# Supplementary material for: The Antioxidant Gallic Acid Inhibits Aflatoxin Formation in <em>Aspergillus flavus</em> by Modulating Transcription Factors FarB and CreA
Source: Preprints.org preprint supplement (doi:10.20944/preprints201806.0204.v1), 2018-06-13
Supplement: Supplementary file 1 [file supplementary]

Archive with 7 entries (7 files):
- Figure S1.pdf
- Table S1-S2.pdf
- Table S3 the transcriptomic profile and the significantly differently expressed genes.xlsx
- Table S4 56 clusters backbone genes.xlsx
- Table S5 peroxisome and fatty acid oxidation.xlsx
- Table S6 GO data.xlsx
- Table S7 Primers for creA mutant and qRT-pcr.xlsx
