# Supplementary material for: The Antioxidant Gallic Acid Inhibits Aflatoxin Formation in <em>Aspergillus flavus</em> by Modulating Transcription Factors FarB and CreA
Source: Preprints.org preprint supplement (doi:10.20944/preprints201806.0204.v1), 2018-06-13
Supplement: Supplementary file 1 [file supplementary › Figure S1.pdf]

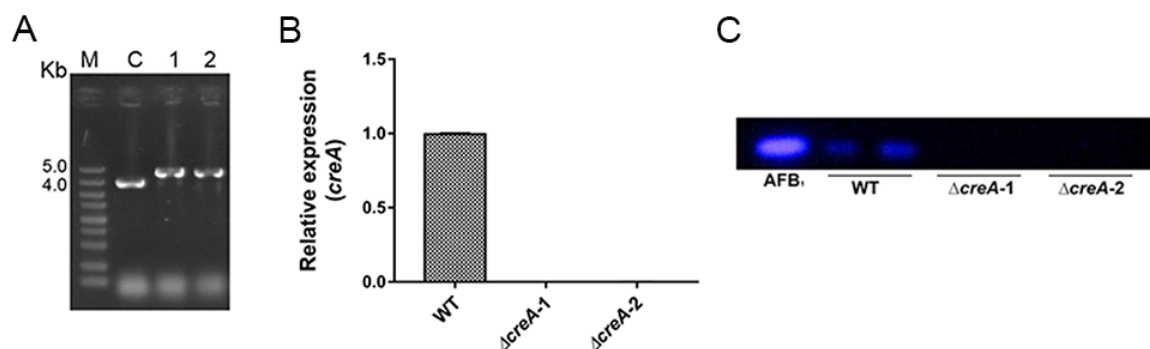

**Figure S1. Confirmation of *creA* mutants (A and B) and the aflatoxin formation in *creA* mutants (C).** (A). The primers *creA*-NF and *creA*-NR was used to confirm the *creA* mutants, the size of *creA*-NF and *creA*-NR from WT is around 3.8 kb, from *creA* deletion mutants is around 4.5 kb. (B). Primers *creA*-F and *creA*-N was used for qRT-PCR to confirm the *creA* deletion mutants  $\Delta creA-1$  and  $\Delta creA-2$ . (C).  $10^7$  spores of WT,  $\Delta creA-1$  and  $\Delta creA-2$  strains were inoculated into 30 mL PDB, and cultured at 200 rpm, 30 °C for 3 days, 200  $\mu$ L culture medium was used for aflatoxin TLC analysis.
