# Supplementary material for: The Antioxidant Gallic Acid Inhibits Aflatoxin Formation in <em>Aspergillus flavus</em> by Modulating Transcription Factors FarB and CreA
Source: Preprints.org preprint supplement (doi:10.20944/preprints201806.0204.v1), 2018-06-13
Supplement: Supplementary file 1 [file supplementary › Table S1-S2.pdf]

**Table S1. The inhibition rate and significance analysis of gallic acid on *A. flavus* growth**

|                  | PDA        | PDA+0.2% GA                     |                               | PDA+0.5% GA        |                 | PDA+0.8% GA        |                 | PDA+1% GA          |                 |
|------------------|------------|---------------------------------|-------------------------------|--------------------|-----------------|--------------------|-----------------|--------------------|-----------------|
|                  | Dc<br>(cm) | inhibition<br>rate <sup>#</sup> | Log2<br>(Ds/Dc <sup>*</sup> ) | inhibition<br>rate | Log2<br>(Ds/Dc) | inhibition<br>rate | Log2<br>(Ds/Dc) | inhibition<br>rate | Log2<br>(Ds/Dc) |
| 3 d <sup>a</sup> | 2.75       | 0.09                            | -0.14                         | 0.15               | -0.24           | 0.21               | -0.33           | 0.24               | -0.40           |
| 4 d              | 3.82       | 0.08                            | -0.12                         | 0.15               | -0.23           | 0.19               | -0.30           | 0.21               | -0.34           |
| 5 d              | 4.62       | 0.06                            | -0.10                         | 0.14               | -0.22           | 0.18               | -0.29           | 0.22               | -0.36           |
| 6 d              | 5.47       | 0.07                            | -0.10                         | 0.15               | -0.23           | 0.19               | -0.31           | 0.21               | -0.34           |
| 7 d              | 6.23       | 0.07                            | -0.11                         | 0.16               | -0.25           | 0.19               | -0.30           | 0.21               | -0.35           |
| 10 d             | 8.00       | 0.04                            | -0.06                         | 0.10               | -0.15           | 0.14               | -0.21           | 0.16               | -0.26           |

<sup>#</sup>: inhibition rate=1-Ds/Dc. <sup>\*</sup>: Ds: the mean value of gallic acid treated *A. flavus* colonies diameter. Dc: the mean value of the untreated *A. flavus* colonies diameter with the same culture days. <sup>a</sup>: days.

**Table S2. Summary of the RNA-Seq data**

| Sample               | P1         | P2         | P3         | P02-1      | P02-2      | P02-3      | P08-1      | P08-2      | P08-3      |
|----------------------|------------|------------|------------|------------|------------|------------|------------|------------|------------|
| Raw Reads Number     | 23,898,280 | 22,778,644 | 23,273,248 | 23,292,774 | 23,976,760 | 22,857,152 | 20,548,080 | 22,896,190 | 24,414,006 |
| Clean Reads Number   | 23,118,022 | 22,133,478 | 22,624,608 | 22,585,384 | 23,340,760 | 22,191,008 | 19,892,462 | 22,142,460 | 23,708,028 |
| Clean Reads Rate (%) | 96.73      | 97.17      | 97.21      | 96.96      | 97.35      | 97.09      | 96.81      | 96.71      | 97.11      |
| Mapped Reads         | 20,770,075 | 19,955,585 | 20,593,157 | 20,194,237 | 20,894,924 | 17,143,917 | 18,172,737 | 19,738,124 | 21,416,603 |
| Mapping Rate (%)     | 0.8984     | 0.9016     | 0.9102     | 0.8941     | 0.8952     | 0.7726     | 0.9135     | 0.8914     | 0.9033     |
| UnMapped Reads       | 2,347,947  | 2,177,893  | 2,031,451  | 2,391,147  | 2,445,836  | 5,047,091  | 1,719,725  | 2,404,336  | 2,291,425  |
| MultiMap Reads       | 72,026     | 78,501     | 55,283     | 80,440     | 74,028     | 270,335    | 42,123     | 94,076     | 52,264     |
| MultiMap Rate (%)    | 0.0031     | 0.0035     | 0.0024     | 0.0036     | 0.0032     | 0.0122     | 0.0021     | 0.0042     | 0.0022     |
| UniqueMap Reads      | 18,350,102 | 17699191   | 18506423   | 17722650   | 18375060   | 11826491   | 16410889   | 17239712   | 19072914   |
| UniqueMap Rate (%)   | 0.8834875  | 0.8869292  | 0.8986686  | 0.8776093  | 0.8794031  | 0.689836   | 0.9030499  | 0.873422   | 0.890567   |

P1, P2, P3: triplicates of the untreated *A. flavus* samples. P02-1, P02-2, P02-3: triplicates of the 0.2% (w/v) gallic acid treated *A. flavus* samples. P08-1, P08-2, P08-3: triplicates of the 0.8% (w/v) gallic acid treated *A. flavus* samples.
