# Supplementary material for: The Antioxidant Gallic Acid Inhibits Aflatoxin Formation in <em>Aspergillus flavus</em> by Modulating Transcription Factors FarB and CreA
Source: Preprints.org preprint supplement (doi:10.20944/preprints201806.0204.v1), 2018-06-13
Supplement: Supplementary file 1 [file supplementary › Table S4 56 clusters backbone genes.xlsx]

## Sheet: Sheet1
a: the average from each genes triplicate FPKM value. P: untreated A. flavus samples, P02: 0.2% (w/v) gallic acid treated A. flavus samples, P08: 0.8% (w/v) gallic acid treated A. flavus samples.
b: genes expression level in P02 compare with P, ratio: the mean value of the count number of each gene in P02/in P, significant: gene with |log2Ratio|≥1 and q<0.05 was consider as significantly differentially expressed, described as 'yes".
c: genes expression level in P08 compare with P, ratio: the mean value of the count number of each gene in P08/in P, significant: gene with |log2Ratio|≥1 and q<0.05 was consider as significantly differentially expressed, described as 'yes".
		FPKMa			P02_Pb				P08_Pc
Cluster #	Backbone gene	P	P02	P08	Log2 ratio	p value	Up/Down	Significant	Log2 ratio	p value	Up/Down	Significant	Description
1	AFLA_002900	14.2216	20.7165	25.8152	0.464437	0.737778	up	no	0.77205	0.0141399	up	no	polyketide synthase, putative
2	AFLA_004300	0.104483	0.119929	0.241205	0.168395	1	up	no	1.18673	0.57496	up	no	prenyltransferase, putative
3	AFLA_004450	0.582892	1.11712	0.817221	0.922247	0.258719	up	no	0.467113	0.397255	up	no	nonribosomal peptide synthase, putative
4	AFLA_005440	0.0262092	0.0235232	0.0235097	-0.396924	1	down	no	-0.276117	1	down	no	nonribosomal peptide synthase, putative
5	AFLA_006170	2.37584	1.05356	1.10677	-1.17274	0.107942	down	no	-1.10368	0.00585479	down	yes	polyketide synthetase PksP
6	AFLA_008770	0.035418	0.0315129	0.0853848	-0.230108	1	down	no	1.19629	0.180013	up	no	nonribosomal peptide synthase, putative
7	AFLA_009120	1.04262	1.15324	0.509093	0.0859796	1	up	no	-1.05807	0.174934	down	no	NRPS-like enzyme, putative
8	AFLA_010000	1.27816	0.559917	0.516777	-1.22629	0.159968	down	no	-1.34942	0.0443335	down	yes	polyketide synthase, putative
8	AFLA_010010	3.69142	2.61156	1.68593	-0.503266	0.68755	down	no	-1.1658	0.00200973	down	yes	nonribosomal peptide synthase, putative
8	AFLA_010020	3.60869	3.04695	3.10084	-0.273407	0.877152	down	no	-0.254134	0.596107	down	no	nonribosomal peptide synthase, putative
9	AFLA_010580	32.5638	5.74615	2.14444	-2.5996	0.0876997	down	no	-3.94173	2.4e-87	down	yes	nonribosomal peptide synthase, putative
9	AFLA_010620	1.15454	1.4638	1.95674	0.29587	0.866644	up	no	0.720701	0.128974	up	no	nonribosomal siderophore peptide synthase Sid2
10	AFLA_016140	121.139	104.97	287.495	-0.238293	0.987341	down	no	1.17252	6.94e-05	up	yes	conidial pigment biosynthesis scytalone dehydratase Arp1
11	AFLA_023020	0.30329	0.0262272	0.0236354	-3.54334	0.0703404	down	no	-3.68929	0.00657783	down	yes	NRPS-like enzyme, putative
12	AFLA_028720	0.0570014	0.0264863	0.0218826	-1.19003	0.904345	down	no	-1.49501	0.85482	down	no	NRPS-like enzyme, putative
13	AFLA_038600	0.416959	0.177707	0.366124	-1.33234	0.459786	down	no	-0.245608	0.839154	down	no	nonribosomal peptide synthase, putative
14	AFLA_041050												enterobactin esterase IroE-like, putative
15	AFLA_045490	0.0788078	0	0.080798	#NAME?	0.728781	down	no	-0.143939	1	down	no	dimethylallyl tryptophan synthase, putative
16	AFLA_047190	46.7513	24.7983	29.9622	-0.870941	0.317969	down	no	-0.624644	0.059361	down	no	L-ornithine N5-oxygenase SidA
16	AFLA_047200	38.8955	44.5371	34.8605	0.214016	0.927807	up	no	-0.149975	0.663011	down	no	palmitoyltransferase SidR
17	AFLA_053770	1.86127	0.497316	0.649456	-1.92361	0.122974	down	no	-1.55644	0.106045	down	no	PKS-like enzyme, putative
17	AFLA_053780	1.41261	1.1341	0.707079	-0.398191	0.92533	down	no	-1.04117	0.237168	down	no	PKS-like enzyme, putative
17	AFLA_053870	1.11998	0.883785	1.29233	-0.338279	0.81262	down	no	0.206555	0.800635	up	no	polyketide synthase, putative
18	AFLA_054270	0.0643993	0.0428182	0.0104495	-0.724	0.96484	down	no	-2.73906	0.288118	down	no	NRPS-like enzyme, putative
19	AFLA_060680	72.3913	10.7934	57.2471	-2.72994	2.05e-07	down	yes	-0.334921	0.546127	down	no	dimethylallyl tryptophan synthase, putative
20	AFLA_062820	3.72382	1.25607	15.6434	-1.60565	0.210611	down	no	2.05765	4.13e-09	up	yes	polyketide synthase, putative
20	AFLA_062860	13.2783	5.31655	54.8707	-1.39093	0.0622689	down	no	1.9784	8.59e-07	up	yes	polyketide synthase, putative
21	AFLA_064560	0.505512	0.295594	0.28492	-0.80261	0.698926	down	no	-0.925024	0.616275	down	no	nonribosomal peptide synthase, putative
22	AFLA_066720	0.406917	0.109949	0.123949	-1.88054	0.025434	down	yes	-1.70541	0.0731331	down	no	nonribosomal peptide synthase, putative
23	AFLA_066840	2.40573	2.20221	1.96313	-0.198706	0.937415	down	no	-0.362339	0.40885	down	no	hybrid NRPS/PKS enzyme, putative
23	AFLA_066980	5.1033	1.65995	1.91674	-1.72513	0.0462487	down	yes	-1.50985	1.6e-06	down	yes	polyketide synthase, putative
24	AFLA_069330	77.2819	26.8979	23.3959	-1.54074	0.01834	down	yes	-1.7294	2.5e-17	down	yes	nonribosomal peptide synthase Pes1
25	AFLA_070860	0.461868	0.209152	0.208998	-1.16654	0.527646	down	no	-1.13272	0.1297	down	no	ACV synthetase PcbAB
25	AFLA_070920	0.0118012	0.0112832	0	0.0909487	1	up	no	#NAME?	1	down	no	NRPS-like enzyme, putative
26	AFLA_079360	0.112141	0	0.286095	#NAME?	0.876886	down	no	1.42119	0.709707	up	no	PKS-like enzyme, putative
26	AFLA_079380	1.39023	1.03657	3.30363	-0.436859	0.803478	down	no	1.21829	0.0122201	up	yes	NRPS-like enzyme, putative
26	AFLA_079400	40.8631	18.4229	18.0339	-1.16114	0.334751	down	no	-1.16488	8.15e-07	down	yes	NRPS-like enzyme, putative
27	AFLA_082150	0.0566278	0.0420297	0.146324	-0.461102	1	down	no	1.28833	0.252016	up	no	polyketide synthase, putative
28	AFLA_082480	0.201859	0.11652	0.0917375	-1.00714	1	down	no	-1.2214	0.900241	down	no	NRPS-like enzyme, putative
29	AFLA_084080	0.239151	0	0.246212	#NAME?	0.372128	down	no	0.0068272	1	up	no	dimethylallyl tryptophan synthase, putative
30	AFLA_090190												dimethylallyl tryptophan synthase, putative
30	AFLA_090200	0.0131925	0.0088873	0.0499229	-0.763987	1	down	no	1.81414	0.452996	up	no	nonribosomal peptide synthase, putative
31	AFLA_095040	0.187332	0.105556	0.125825	-0.735887	0.96041	down	no	-0.594057	1	down	no	NRPS-like enzyme, putative
31	AFLA_095050	0.138829	0	0	#NAME?	0.383191	down	no	#NAME?	0.172714	down	no	dimethylaniline monooxygenase, putative
32	AFLA_096390	0.0696276	0.0800125	0	0.246783	1	up	no	#NAME?	0.73367	down	no	geranylgeranyl pyrophosphate synthase AtmC
33	AFLA_096700												NRPS-like enzyme, putative
33	AFLA_096710	0.0748896	0	0.164563	#NAME?	0.863822	down	no	1.22099	0.890414	up	no	NRPS-like enzyme, putative
33	AFLA_096770	0.0603895	0.0619573	0.206489	-0.0344676	1	down	no	1.65509	0.291981	up	no	polyketide synthase, putative
34	AFLA_100340	0.00931304	0	0	#NAME?	1	down	no	#NAME?	1	down	no	nonribosomal peptide synthase, putative
35	AFLA_101700	13.838	16.8069	17.4907	0.238046	0.845558	up	no	0.277642	0.469673	up	no	NRPS-like enzyme, putative
36	AFLA_104210	0.602382	0.54729	0.761147	-0.22823	1	down	no	0.202156	0.934863	up	no	PKS-like enzyme, putative
36	AFLA_104240	7.62806	5.00133	7.61184	-0.695044	0.653109	down	no	-0.0652889	1	down	no	PKS-like enzyme, putative
36	AFLA_104250	9.66847	9.39378	10.7546	-0.097807	0.998145	down	no	0.107583	0.884376	up	no	PKS-like enzyme, putative
37	AFLA_105190	3.76968	2.02559	6.6223	-1.05299	0.739077	down	no	0.694814	0.196953	up	no	NRPS-like enzyme, putative
38	AFLA_105450	0.103227	0.162735	0.126907	0.610623	0.752438	up	no	0.209082	0.8552	up	no	polyketide synthase, putative
39	AFLA_108550	0.0854934	0.0419609	0.0419711	-1.20202	0.846994	down	no	-1.14111	0.51645	down	no	polyketide synthase, putative
40	AFLA_112840	1.0968	0.754842	0.996284	-0.602019	0.717743	down	no	-0.174243	0.826781	down	no	polyketide synthase, putative
41	AFLA_114820	1.79637	1.84237	2.28806	-0.00631989	1	down	no	0.282759	0.643791	up	no	polyketide synthase, putative
42	AFLA_116220	0.311848	0.245627	0.118787	-0.442255	0.889416	down	no	-1.51301	0.0764425	down	no	polyketide synthase, putative
43	AFLA_116500	0.110575	0	0	#NAME?	0.585708	down	no	#NAME?	0.353321	down	no	PKS-like enzyme, putative
43	AFLA_116600	8.57687	2.73063	3.18406	-1.71249	0.0257572	down	yes	-1.48324	0.000826095	down	yes	dimethylallyl tryptophan synthase, putative
44	AFLA_116890	3.27789	0.427874	0.366355	-2.98869	0.0039341	down	yes	-3.16962	6.46e-20	down	yes	polyketide synthase, putative
45	AFLA_118440	2.25037	3.17614	2.01973	0.361404	0.840555	up	no	-0.237652	0.737169	down	no	NRPS-like enzyme, putative
46	AFLA_118940	0.137172	0.120067	0.10237	-0.239675	1	down	no	-0.483697	0.733342	down	no	polyketide synthase, putative
46	AFLA_118960	0.304102	0.0873075	0.101055	-1.79796	0.104013	down	no	-1.58392	0.0291407	down	yes	polyketide synthase, putative
47	AFLA_119110	0.645877	0.368142	0.395267	-0.802987	0.623335	down	no	-0.724604	0.482205	down	no	NRPS-like enzyme, putative
48	AFLA_121520	0.0686608	0.0117438	0.0489862	-2.63634	0.639726	down	no	-0.632483	0.914467	down	no	NRPS-like enzyme, putative
49	AFLA_125640	0	0	0.0156172					Inf	1	up	no	PKS-like enzyme, putative
50	AFLA_126710	0.0277918	0.010696	0.0446781	-1.48625	0.823935	down	no	0.606614	0.834719	up	no	polyketide synthase, putative
51	AFLA_127090	0.641617	0.411805	0.406687	-0.633314	0.615867	down	no	-0.67394	0.311984	down	no	polyketide synthase, putative
52	AFLA_128060	0.124762	0.0803148	0.134867	-0.731309	0.799331	down	no	-0.00431444	0.991745	down	no	polyketide synthase, putative
53	AFLA_135490	0.193843	0.228898	0.273615	0.255162	0.948092	up	no	0.453649	0.775344	up	no	nonribosomal peptide synthase, putative
54	AFLA_139410	183.9	189.784	24.5096	-0.00522355	1	down	no	-2.96887	6.68e-41	down	yes	aflC / pksA / pksL1 / polyketide synthase
55	AFLA_139480	382.567	291.738	403.277	-0.412435	0.7435	down	no	0.0403711	0.988608	up	no	dimethylallyl tryptophan synthase, putative
55	AFLA_139490	20.216	8.4981	8.85336	-1.27466	0.27957	down	no	-1.17628	0.000159337	down	yes	hybrid PKS/NRPS enzyme, putative
56	AFLA_096050	12.3104	13.623	21.1366	0.0985067	0.984792	up	no	0.719617	0.07863	up	no	protein RDR1, putative
