# Supplementary material for: The Antioxidant Gallic Acid Inhibits Aflatoxin Formation in <em>Aspergillus flavus</em> by Modulating Transcription Factors FarB and CreA
Source: Preprints.org preprint supplement (doi:10.20944/preprints201806.0204.v1), 2018-06-13
Supplement: Supplementary file 1 [file supplementary › Table S5 peroxisome and fatty acid oxidation.xlsx]

## Sheet: Sheet1
a: the average from each genes triplicate FPKM value. P: untreated A. flavus samples, P02: 0.2% (w/v) gallic acid treated A. flavus samples, P08: 0.8% (w/v) gallic acid treated A. flavus samples.
b: genes expression level in P02 compare with P, ratio: the mean value of the count number of each gene in P02/in P, significant: gene with |log2Ratio|≥1 and q<0.05 was consider as significantly differentially expressed, described as 'yes".
c: genes expression level in P08 compare with P, ratio: the mean value of the count number of each gene in P08/in P, significant: gene with |log2Ratio|≥1 and q<0.05 was consider as significantly differentially expressed, described as 'yes".
	FPKMa			P02_Pb				P08_Pc
Gene ID	P	P02	P08	Log2 ratio	p value	Up/Down	Significant	Log2 ratio	p value	Up/Down	Significant	Description
peroxisomal
AFLA_053060	89.9988	169.713	202.611	0.872398	0.180526	up	no	1.10535	7.84e-05	up	yes	peroxiredoxin 5, prdx5, putative
AFLA_073320	12.4581	34.2789	43.4657	1.43047	0.0132362	up	yes	1.74983	3.85e-07	up	yes	3-ketoacyl-CoA thiolase (POT1), putative
AFLA_086800	45.4499	60.3292	129.565	0.357719	0.770045	up	no	1.42918	3.7e-06	up	yes	epoxide hydrolase, putative
AFLA_086860	6.4562	7.31489	13.8863	0.136736	0.963859	up	no	1.05007	0.0268206	up	yes	NUDIX domain protein
AFLA_115890	0.868276	1.00921	2.07829	0.185236	1	up	no	1.25723	0.0438053	up	yes	acyl-CoA oxidase, putative
AFLA_091060	830.325	1296.03	2168.52	0.585119	0.587215	up	no	1.30209	1.28e-05	up	yes	allergen Asp F3
AFLA_019280	150.157	282.34	334.949	0.893377	0.17903	up	no	1.10355	6.96e-05	up	yes	peroxiredoxin, putative
AFLA_099870	9.01769	19.3003	24.7008	1.08002	0.13425	up	no	1.44337	0.00830332	up	yes	alpha/beta hydrolase, putative
AFLA_100250	3.62999	1.75863	10.2345	-1.13087	0.39674	down	no	1.38167	0.0203735	up	yes	catalase Cat
AFLA_139080	2.10296	0.706728	0.299613	-1.47877	0.625393	down	no	-2.75859	0.000301106	down	yes	AAA ATPase, putative
AFLA_024060	6.28662	3.67635	3.1469	-0.830071	0.419916	down	no	-1.06555	0.0334533	down	yes	nonspecific lipid-transfer protein, putative
AFLA_026950	308.833	230.414	144.086	-0.404572	0.731685	down	no	-1.08085	0.016751	down	yes	3-ketoacyl-coA thiolase peroxisomal A precursor
AFLA_033670	526.032	302.5	213.383	-0.782236	0.455563	down	no	-1.32377	1.78e-09	down	yes	lipid transfer protein, putative
AFLA_035080	71.7894	29.604	27.0461	-1.34098	0.0896494	down	no	-1.5039	1.85e-10	down	yes	glucose-methanol-choline (gmc) oxidoreductase, putative
AFLA_052400	798.892	339.156	262.884	-1.30079	0.0826523	down	no	-1.67563	1.2e-15	down	yes	isocitrate lyase AcuD
AFLA_009410	5.34128	2.26356	2.43528	-1.24717	0.2017	down	no	-1.14473	0.0417384	down	yes	delta(3,5)-delta(2,4)-dienoyl-CoA isomerase, mitochondrial precursor, putative
AFLA_077250	57.6564	37.1401	21.0161	-0.609063	0.514907	down	no	-1.45728	0.000434502	down	yes	fatty-acyl coenzyme A oxidase (Pox1), putative
AFLA_079220	4.00187	1.49563	0.463707	-1.42844	0.138298	down	no	-3.13526	4.55e-07	down	yes	glucose dehydrogenase, putative
AFLA_117410	0.940204	0.253394	0.200575	-1.96959	0.609927	down	no	-2.38583	0.0213172	down	yes	citrate synthase, putative
AFLA_090720	1.54493	0.751826	0.223432	-1.16221	0.619432	down	no	-2.86983	0.000293024	down	yes	male sterility domain containing protein, putative
AFLA_016570	38.9287	19.9465	18.3351	-1.06957	0.28479	down	no	-1.21816	0.0378921	down	yes	epoxide hydrolase, putative
AFLA_018560	34.8745	26.3681	13.2373	-0.359958	0.84563	down	no	-1.38699	9.07e-08	down	yes	ABC fatty acid transporter, putative
AFLA_041580	255.759	159.3	119.158	-0.647179	0.537417	down	no	-1.07295	0.000752014	down	yes	estradiol 17 beta-dehydrogenase, putative
AFLA_041590	211.692	145.529	93.7162	-0.513891	0.641988	down	no	-1.15888	1.71e-05	down	yes	peroxisomal multifunctional beta-oxidation protein (MFP), putative
AFLA_044460	7.03523	2.38532	1.72449	-1.59528	0.03496	down	yes	-2.10219	0.026185	down	yes	phenylacetyl-CoA ligase, putative
AFLA_070820	106.185	81.4463	54.9339	-0.448289	0.704416	down	no	-1.02024	0.00158922	down	yes	3-hydroxymethyl-3-methylglutaryl-Coenzyme A lyase, putative
AFLA_000640	3.91672	1.94031	1.41206	-1.03482	0.271518	down	no	-1.49321	0.00491379	down	yes	polyamine oxidase, putative
AFLA_049390	847.809	301.334	260.366	-1.54083	0.0319623	down	yes	-1.77828	9.84e-18	down	yes	malate synthase AcuE
AFLA_134180	45.7539	23.015	22.0157	-0.947245	0.294572	down	no	-1.03292	0.000316102	down	yes	peroxisomal 3-ketoacyl-coA thiolase (Kat1), putative
AFLA_134190	3.45162	2.23759	1.67163	-0.615131	0.582581	down	no	-1.02594	0.0425223	down	yes	bifunctional fatty acid transporter and acyl-CoA synthetase, putative
AFLA_135240	219.763	125.805	90.1078	-0.814827	0.292847	down	no	-1.29979	1.85e-05	down	yes	carnitine acetyl transferase
fatty acid beta-oxidation
AFLA_073320	12.4581	34.2789	43.4657	1.43047	0.0132362	up	yes	1.74983	3.85e-07	up	yes	3-ketoacyl-CoA thiolase (POT1), putative
AFLA_115890	0.868276	1.00921	2.07829	0.185236	1	up	no	1.25723	0.0438053	up	yes	acyl-CoA oxidase, putative
AFLA_026950	308.833	230.414	144.086	-0.404572	0.731685	down	no	-1.08085	0.016751	down	yes	3-ketoacyl-coA thiolase peroxisomal A precursor
AFLA_111190	128.559	103.75	43.7578	-0.240166	0.977877	down	no	-1.51995	6.09e-12	down	yes	acyl-CoA dehydrogenase, putative
AFLA_009410	5.34128	2.26356	2.43528	-1.24717	0.2017	down	no	-1.14473	0.0417384	down	yes	delta(3,5)-delta(2,4)-dienoyl-CoA isomerase, mitochondrial precursor, putative
AFLA_077250	57.6564	37.1401	21.0161	-0.609063	0.514907	down	no	-1.45728	0.000434502	down	yes	fatty-acyl coenzyme A oxidase (Pox1), putative
AFLA_077410	6.11645	3.2902	1.77479	-0.941436	0.380007	down	no	-1.84842	9.54e-05	down	yes	acyl-CoA dehydrogenase, putative
AFLA_117410	0.940204	0.253394	0.200575	-1.96959	0.609927	down	no	-2.38583	0.0213172	down	yes	citrate synthase, putative
AFLA_018560	34.8745	26.3681	13.2373	-0.359958	0.84563	down	no	-1.38699	9.07e-08	down	yes	ABC fatty acid transporter, putative
AFLA_018730	30.3809	16.0461	10.6645	-0.922262	0.255874	down	no	-1.53648	4.77e-06	down	yes	epoxide hydrolase, putative
AFLA_041580	255.759	159.3	119.158	-0.647179	0.537417	down	no	-1.07295	0.000752014	down	yes	estradiol 17 beta-dehydrogenase, putative
AFLA_041590	211.692	145.529	93.7162	-0.513891	0.641988	down	no	-1.15888	1.71e-05	down	yes	peroxisomal multifunctional beta-oxidation protein (MFP), putative
AFLA_043970	18.7785	13.92	9.26247	-0.483852	0.707936	down	no	-1.08158	0.00695393	down	yes	enoyl-CoA hydratase
AFLA_134180	45.7539	23.015	22.0157	-0.947245	0.294572	down	no	-1.03292	0.000316102	down	yes	peroxisomal 3-ketoacyl-coA thiolase (Kat1), putative
AFLA_134190	3.45162	2.23759	1.67163	-0.615131	0.582581	down	no	-1.02594	0.0425223	down	yes	bifunctional fatty acid transporter and acyl-CoA synthetase, putative
