# Supplementary material for: The Antioxidant Gallic Acid Inhibits Aflatoxin Formation in <em>Aspergillus flavus</em> by Modulating Transcription Factors FarB and CreA
Source: Preprints.org preprint supplement (doi:10.20944/preprints201806.0204.v1), 2018-06-13
Supplement: Supplementary file 1 [file supplementary › Table S6 GO data.xlsx]

## Sheet: P02_P_Biological Process
Description	GO	p	FDR	Significant	Gene_in_de	Annotated	Up_Gene	Up_Count	Down_Gene	Down_Count	Links	Result
small molecule catabolic process	GO:0044282	1.8e-06	0.0130248	27	AFLA_024750|AFLA_028740|AFLA_035970|AFLA_036090|AFLA_036110|AFLA_036440|AFLA_107840|AFLA_108930|AFLA_060700|AFLA_062260|AFLA_063160|AFLA_012050|AFLA_012080|AFLA_073320|AFLA_122560|AFLA_122570|AFLA_093790|AFLA_015920|AFLA_044400|AFLA_099250|AFLA_099270|AFLA_099280|AFLA_067450|AFLA_071180|AFLA_003810|AFLA_049390|AFLA_005130	258	AFLA_028740|AFLA_035970|AFLA_108930|AFLA_062260|AFLA_073320|AFLA_122560|AFLA_122570|AFLA_067450|AFLA_003810	9	AFLA_024750|AFLA_036090|AFLA_036110|AFLA_036440|AFLA_107840|AFLA_060700|AFLA_063160|AFLA_012050|AFLA_012080|AFLA_093790|AFLA_015920|AFLA_044400|AFLA_099250|AFLA_099270|AFLA_099280|AFLA_071180|AFLA_049390|AFLA_005130	18	http://amigo.geneontology.org/cgi-bin/amigo/term_details?term=GO:0044282	yes
carboxylic acid catabolic process	GO:0046395	6.9e-06	0.0166428	23	AFLA_024750|AFLA_035970|AFLA_036090|AFLA_036110|AFLA_036440|AFLA_107840|AFLA_108930|AFLA_060700|AFLA_062260|AFLA_063160|AFLA_012050|AFLA_012080|AFLA_073320|AFLA_122560|AFLA_122570|AFLA_015920|AFLA_099250|AFLA_099270|AFLA_099280|AFLA_067450|AFLA_071180|AFLA_049390|AFLA_005130	214	AFLA_035970|AFLA_108930|AFLA_062260|AFLA_073320|AFLA_122560|AFLA_122570|AFLA_067450	7	AFLA_024750|AFLA_036090|AFLA_036110|AFLA_036440|AFLA_107840|AFLA_060700|AFLA_063160|AFLA_012050|AFLA_012080|AFLA_015920|AFLA_099250|AFLA_099270|AFLA_099280|AFLA_071180|AFLA_049390|AFLA_005130	16	http://amigo.geneontology.org/cgi-bin/amigo/term_details?term=GO:0046395	yes
organic acid catabolic process	GO:0016054	6.9e-06	0.0166428	23	AFLA_024750|AFLA_035970|AFLA_036090|AFLA_036110|AFLA_036440|AFLA_107840|AFLA_108930|AFLA_060700|AFLA_062260|AFLA_063160|AFLA_012050|AFLA_012080|AFLA_073320|AFLA_122560|AFLA_122570|AFLA_015920|AFLA_099250|AFLA_099270|AFLA_099280|AFLA_067450|AFLA_071180|AFLA_049390|AFLA_005130	214	AFLA_035970|AFLA_108930|AFLA_062260|AFLA_073320|AFLA_122560|AFLA_122570|AFLA_067450	7	AFLA_024750|AFLA_036090|AFLA_036110|AFLA_036440|AFLA_107840|AFLA_060700|AFLA_063160|AFLA_012050|AFLA_012080|AFLA_015920|AFLA_099250|AFLA_099270|AFLA_099280|AFLA_071180|AFLA_049390|AFLA_005130	16	http://amigo.geneontology.org/cgi-bin/amigo/term_details?term=GO:0016054	yes
single-organism catabolic process	GO:0044712	5.3e-05	0.095877	42	AFLA_023420|AFLA_024750|AFLA_028740|AFLA_029780|AFLA_030430|AFLA_035970|AFLA_036090|AFLA_036110|AFLA_036440|AFLA_107840|AFLA_108930|AFLA_110960|AFLA_056250|AFLA_060700|AFLA_062260|AFLA_063160|AFLA_124470|AFLA_012050|AFLA_012080|AFLA_073320|AFLA_125700|AFLA_120890|AFLA_122560|AFLA_122570|AFLA_093790|AFLA_015920|AFLA_018500|AFLA_041410|AFLA_042390|AFLA_044400|AFLA_099250|AFLA_099270|AFLA_099280|AFL…	588	AFLA_028740|AFLA_029780|AFLA_035970|AFLA_108930|AFLA_110960|AFLA_062260|AFLA_073320|AFLA_120890|AFLA_122560|AFLA_122570|AFLA_018500|AFLA_042390|AFLA_101470|AFLA_102850|AFLA_067450|AFLA_003220|AFLA_003810|AFLA_134560	18	AFLA_023420|AFLA_024750|AFLA_030430|AFLA_036090|AFLA_036110|AFLA_036440|AFLA_107840|AFLA_056250|AFLA_060700|AFLA_063160|AFLA_124470|AFLA_012050|AFLA_012080|AFLA_125700|AFLA_093790|AFLA_015920|AFLA_041410|AFLA_044400|AFLA_099250|AFLA_099270|AFLA_099280|AFLA_071180|AFLA_049390|AFLA_005130	24	http://amigo.geneontology.org/cgi-bin/amigo/term_details?term=GO:0044712	no
alpha-amino acid catabolic process	GO:1901606	0.00042	0.607824	11	AFLA_036090|AFLA_036110|AFLA_036440|AFLA_060700|AFLA_015920|AFLA_099250|AFLA_099270|AFLA_099280|AFLA_067450|AFLA_071180|AFLA_005130	86	AFLA_067450	1	AFLA_036090|AFLA_036110|AFLA_036440|AFLA_060700|AFLA_015920|AFLA_099250|AFLA_099270|AFLA_099280|AFLA_071180|AFLA_005130	10	http://amigo.geneontology.org/cgi-bin/amigo/term_details?term=GO:1901606	no
leucine catabolic process	GO:0006552	0.00054	0.65124	3	AFLA_099250|AFLA_099270|AFLA_099280	5	.	0	AFLA_099250|AFLA_099270|AFLA_099280	3	http://amigo.geneontology.org/cgi-bin/amigo/term_details?term=GO:0006552	no
cellular amino acid catabolic process	GO:0009063	0.00086	0.888994	12	AFLA_035970|AFLA_036090|AFLA_036110|AFLA_036440|AFLA_060700|AFLA_015920|AFLA_099250|AFLA_099270|AFLA_099280|AFLA_067450|AFLA_071180|AFLA_005130	108	AFLA_035970|AFLA_067450	2	AFLA_036090|AFLA_036110|AFLA_036440|AFLA_060700|AFLA_015920|AFLA_099250|AFLA_099270|AFLA_099280|AFLA_071180|AFLA_005130	10	http://amigo.geneontology.org/cgi-bin/amigo/term_details?term=GO:0009063	no
N-acetylneuraminate catabolic process	GO:0019262	0.00148	1	2	AFLA_012050|AFLA_012080	2	.	0	AFLA_012050|AFLA_012080	2	http://amigo.geneontology.org/cgi-bin/amigo/term_details?term=GO:0019262	no
N-acetylneuraminate metabolic process	GO:0006054	0.00148	1	2	AFLA_012050|AFLA_012080	2	.	0	AFLA_012050|AFLA_012080	2	http://amigo.geneontology.org/cgi-bin/amigo/term_details?term=GO:0006054	no
N-acetylglucosamine catabolic process	GO:0006046	0.00148	1	2	AFLA_012050|AFLA_012080	2	.	0	AFLA_012050|AFLA_012080	2	http://amigo.geneontology.org/cgi-bin/amigo/term_details?term=GO:0006046	no
organonitrogen compound catabolic process	GO:1901565	0.00189	1	19	AFLA_023420|AFLA_031380|AFLA_035970|AFLA_036090|AFLA_036110|AFLA_036440|AFLA_060700|AFLA_063160|AFLA_054470|AFLA_015920|AFLA_099250|AFLA_099270|AFLA_099280|AFLA_102850|AFLA_067450|AFLA_071180|AFLA_003810|AFLA_005130|AFLA_134560	237	AFLA_031380|AFLA_035970|AFLA_054470|AFLA_102850|AFLA_067450|AFLA_003810|AFLA_134560	7	AFLA_023420|AFLA_036090|AFLA_036110|AFLA_036440|AFLA_060700|AFLA_063160|AFLA_015920|AFLA_099250|AFLA_099270|AFLA_099280|AFLA_071180|AFLA_005130	12	http://amigo.geneontology.org/cgi-bin/amigo/term_details?term=GO:1901565	no
calcium ion homeostasis	GO:0055074	0.00228	1	6	AFLA_032000|AFLA_075860|AFLA_038590|AFLA_129430|AFLA_068440|AFLA_050180	36	AFLA_032000|AFLA_075860|AFLA_038590|AFLA_129430|AFLA_068440	5	AFLA_050180	1	http://amigo.geneontology.org/cgi-bin/amigo/term_details?term=GO:0055074	no
aromatic amino acid family metabolic process	GO:0009072	0.00282	1	7	AFLA_036090|AFLA_036110|AFLA_110930|AFLA_060700|AFLA_015920|AFLA_066210|AFLA_071180	50	.	0	AFLA_036090|AFLA_036110|AFLA_110930|AFLA_060700|AFLA_015920|AFLA_066210|AFLA_071180	7	http://amigo.geneontology.org/cgi-bin/amigo/term_details?term=GO:0009072	no
ribosomal large subunit biogenesis	GO:0042273	0.00317	1	7	AFLA_112090|AFLA_056250|AFLA_079160|AFLA_080140|AFLA_093880|AFLA_130100|AFLA_068000	51	.	0	AFLA_112090|AFLA_056250|AFLA_079160|AFLA_080140|AFLA_093880|AFLA_130100|AFLA_068000	7	http://amigo.geneontology.org/cgi-bin/amigo/term_details?term=GO:0042273	no
carboxylic acid metabolic process	GO:0019752	0.00318	1	48	AFLA_024510|AFLA_024750|AFLA_030430|AFLA_035970|AFLA_036090|AFLA_036110|AFLA_036440|AFLA_106350|AFLA_107840|AFLA_108930|AFLA_110930|AFLA_112010|AFLA_060530|AFLA_060700|AFLA_062260|AFLA_063160|AFLA_012050|AFLA_012080|AFLA_073320|AFLA_078420|AFLA_079230|AFLA_125680|AFLA_084230|AFLA_116430|AFLA_122560|AFLA_122570|AFLA_014490|AFLA_015920|AFLA_021700|AFLA_041420|AFLA_041430|AFLA_042390|AFLA_044400|AFL…	845	AFLA_035970|AFLA_106350|AFLA_108930|AFLA_112010|AFLA_062260|AFLA_073320|AFLA_116430|AFLA_122560|AFLA_122570|AFLA_014490|AFLA_042390|AFLA_047080|AFLA_101470|AFLA_066620|AFLA_067450|AFLA_134090	16	AFLA_024510|AFLA_024750|AFLA_030430|AFLA_036090|AFLA_036110|AFLA_036440|AFLA_107840|AFLA_110930|AFLA_060530|AFLA_060700|AFLA_063160|AFLA_012050|AFLA_012080|AFLA_078420|AFLA_079230|AFLA_125680|AFLA_084230|AFLA_015920|AFLA_021700|AFLA_041420|AFLA_041430|AFLA_044400|AFLA_044460|AFLA_099250|AFLA_099270|AFLA_099280|AFLA_065130|AFLA_066210|AFLA_071180|AFLA_049390|AFLA_005130|AFLA_138430	32	http://amigo.geneontology.org/cgi-bin/amigo/term_details?term=GO:0019752	no
leucine metabolic process	GO:0006551	0.00346	1	4	AFLA_099250|AFLA_099270|AFLA_099280|AFLA_134090	17	AFLA_134090	1	AFLA_099250|AFLA_099270|AFLA_099280	3	http://amigo.geneontology.org/cgi-bin/amigo/term_details?term=GO:0006551	no
glycine metabolic process	GO:0006544	0.00401	1	3	AFLA_021700|AFLA_047080|AFLA_067450	9	AFLA_047080|AFLA_067450	2	AFLA_021700	1	http://amigo.geneontology.org/cgi-bin/amigo/term_details?term=GO:0006544	no
chorismate biosynthetic process	GO:0009423	0.00401	1	3	AFLA_110930|AFLA_122560|AFLA_066210	9	AFLA_122560	1	AFLA_110930|AFLA_066210	2	http://amigo.geneontology.org/cgi-bin/amigo/term_details?term=GO:0009423	no
erythrose 4-phosphate/phosphoenolpyruvate family amino acid catabolic process	GO:1902222	0.00431	1	4	AFLA_036090|AFLA_036110|AFLA_060700|AFLA_015920	18	.	0	AFLA_036090|AFLA_036110|AFLA_060700|AFLA_015920	4	http://amigo.geneontology.org/cgi-bin/amigo/term_details?term=GO:1902222	no
L-phenylalanine catabolic process	GO:0006559	0.00431	1	4	AFLA_036090|AFLA_036110|AFLA_060700|AFLA_015920	18	.	0	AFLA_036090|AFLA_036110|AFLA_060700|AFLA_015920	4	http://amigo.geneontology.org/cgi-bin/amigo/term_details?term=GO:0006559	no
aromatic amino acid family catabolic process	GO:0009074	0.00456	1	5	AFLA_036090|AFLA_036110|AFLA_060700|AFLA_015920|AFLA_071180	29	.	0	AFLA_036090|AFLA_036110|AFLA_060700|AFLA_015920|AFLA_071180	5	http://amigo.geneontology.org/cgi-bin/amigo/term_details?term=GO:0009074	no
branched-chain amino acid catabolic process	GO:0009083	0.0053	1	4	AFLA_015920|AFLA_099250|AFLA_099270|AFLA_099280	19	.	0	AFLA_015920|AFLA_099250|AFLA_099270|AFLA_099280	4	http://amigo.geneontology.org/cgi-bin/amigo/term_details?term=GO:0009083	no
divalent inorganic cation homeostasis	GO:0072507	0.00539	1	7	AFLA_032000|AFLA_075860|AFLA_038590|AFLA_129430|AFLA_068440|AFLA_003980|AFLA_050180	56	AFLA_032000|AFLA_075860|AFLA_038590|AFLA_129430|AFLA_068440	5	AFLA_003980|AFLA_050180	2	http://amigo.geneontology.org/cgi-bin/amigo/term_details?term=GO:0072507	no
organic hydroxy compound metabolic process	GO:1901615	0.00562	1	23	AFLA_024510|AFLA_030250|AFLA_036110|AFLA_109820|AFLA_110890|AFLA_057420|AFLA_063160|AFLA_125090|AFLA_125270|AFLA_079230|AFLA_125680|AFLA_119710|AFLA_122210|AFLA_122560|AFLA_122570|AFLA_093790|AFLA_016930|AFLA_017590|AFLA_044400|AFLA_065130|AFLA_065740|AFLA_003810|AFLA_138560	339	AFLA_030250|AFLA_110890|AFLA_057420|AFLA_125090|AFLA_119710|AFLA_122560|AFLA_122570|AFLA_016930|AFLA_017590|AFLA_003810|AFLA_138560	11	AFLA_024510|AFLA_036110|AFLA_109820|AFLA_063160|AFLA_125270|AFLA_079230|AFLA_125680|AFLA_122210|AFLA_093790|AFLA_044400|AFLA_065130|AFLA_065740	12	http://amigo.geneontology.org/cgi-bin/amigo/term_details?term=GO:1901615	no
cellular calcium ion homeostasis	GO:0006874	0.00613	1	5	AFLA_032000|AFLA_038590|AFLA_129430|AFLA_068440|AFLA_050180	31	AFLA_032000|AFLA_038590|AFLA_129430|AFLA_068440	4	AFLA_050180	1	http://amigo.geneontology.org/cgi-bin/amigo/term_details?term=GO:0006874	no
pathogenesis	GO:0009405	0.0063	1	13	AFLA_031050|AFLA_109820|AFLA_060680|AFLA_078060|AFLA_127130|AFLA_128330|AFLA_038650|AFLA_046070|AFLA_098090|AFLA_066720|AFLA_069330|AFLA_131330|AFLA_132650	154	AFLA_078060|AFLA_127130|AFLA_128330|AFLA_038650|AFLA_046070|AFLA_098090|AFLA_131330|AFLA_132650	8	AFLA_031050|AFLA_109820|AFLA_060680|AFLA_066720|AFLA_069330	5	http://amigo.geneontology.org/cgi-bin/amigo/term_details?term=GO:0009405	no
divalent metal ion transport	GO:0070838	0.0064	1	6	AFLA_126510|AFLA_018740|AFLA_038590|AFLA_129430|AFLA_068440|AFLA_050180	44	AFLA_038590|AFLA_129430|AFLA_068440	3	AFLA_126510|AFLA_018740|AFLA_050180	3	http://amigo.geneontology.org/cgi-bin/amigo/term_details?term=GO:0070838	no
maturation of LSU-rRNA	GO:0000470	0.00643	1	4	AFLA_079160|AFLA_093880|AFLA_130100|AFLA_068000	20	.	0	AFLA_079160|AFLA_093880|AFLA_130100|AFLA_068000	4	http://amigo.geneontology.org/cgi-bin/amigo/term_details?term=GO:0000470	no
organic hydroxy compound catabolic process	GO:1901616	0.00655	1	7	AFLA_063160|AFLA_125090|AFLA_122560|AFLA_122570|AFLA_093790|AFLA_044400|AFLA_003810	58	AFLA_125090|AFLA_122560|AFLA_122570|AFLA_003810	4	AFLA_063160|AFLA_093790|AFLA_044400	3	http://amigo.geneontology.org/cgi-bin/amigo/term_details?term=GO:1901616	no
oxoacid metabolic process	GO:0043436	0.00672	1	48	AFLA_024510|AFLA_024750|AFLA_030430|AFLA_035970|AFLA_036090|AFLA_036110|AFLA_036440|AFLA_106350|AFLA_107840|AFLA_108930|AFLA_110930|AFLA_112010|AFLA_060530|AFLA_060700|AFLA_062260|AFLA_063160|AFLA_012050|AFLA_012080|AFLA_073320|AFLA_078420|AFLA_079230|AFLA_125680|AFLA_084230|AFLA_116430|AFLA_122560|AFLA_122570|AFLA_014490|AFLA_015920|AFLA_021700|AFLA_041420|AFLA_041430|AFLA_042390|AFLA_044400|AFL…	878	AFLA_035970|AFLA_106350|AFLA_108930|AFLA_112010|AFLA_062260|AFLA_073320|AFLA_116430|AFLA_122560|AFLA_122570|AFLA_014490|AFLA_042390|AFLA_047080|AFLA_101470|AFLA_066620|AFLA_067450|AFLA_134090	16	AFLA_024510|AFLA_024750|AFLA_030430|AFLA_036090|AFLA_036110|AFLA_036440|AFLA_107840|AFLA_110930|AFLA_060530|AFLA_060700|AFLA_063160|AFLA_012050|AFLA_012080|AFLA_078420|AFLA_079230|AFLA_125680|AFLA_084230|AFLA_015920|AFLA_021700|AFLA_041420|AFLA_041430|AFLA_044400|AFLA_044460|AFLA_099250|AFLA_099270|AFLA_099280|AFLA_065130|AFLA_066210|AFLA_071180|AFLA_049390|AFLA_005130|AFLA_138430	32	http://amigo.geneontology.org/cgi-bin/amigo/term_details?term=GO:0043436	no
chorismate metabolic process	GO:0046417	0.00744	1	3	AFLA_110930|AFLA_122560|AFLA_066210	11	AFLA_122560	1	AFLA_110930|AFLA_066210	2	http://amigo.geneontology.org/cgi-bin/amigo/term_details?term=GO:0046417	no
glycosaminoglycan biosynthetic process	GO:0006024	0.00744	1	3	AFLA_075840|AFLA_123350|AFLA_116430	11	AFLA_116430	1	AFLA_075840|AFLA_123350	2	http://amigo.geneontology.org/cgi-bin/amigo/term_details?term=GO:0006024	no
L-phenylalanine metabolic process	GO:0006558	0.00771	1	4	AFLA_036090|AFLA_036110|AFLA_060700|AFLA_015920	21	.	0	AFLA_036090|AFLA_036110|AFLA_060700|AFLA_015920	4	http://amigo.geneontology.org/cgi-bin/amigo/term_details?term=GO:0006558	no
erythrose 4-phosphate/phosphoenolpyruvate family amino acid metabolic process	GO:1902221	0.00771	1	4	AFLA_036090|AFLA_036110|AFLA_060700|AFLA_015920	21	.	0	AFLA_036090|AFLA_036110|AFLA_060700|AFLA_015920	4	http://amigo.geneontology.org/cgi-bin/amigo/term_details?term=GO:1902221	no
glucosamine-containing compound catabolic process	GO:1901072	0.00771	1	4	AFLA_031380|AFLA_054470|AFLA_012050|AFLA_012080	21	AFLA_031380|AFLA_054470	2	AFLA_012050|AFLA_012080	2	http://amigo.geneontology.org/cgi-bin/amigo/term_details?term=GO:1901072	no
organic acid metabolic process	GO:0006082	0.0078	1	48	AFLA_024510|AFLA_024750|AFLA_030430|AFLA_035970|AFLA_036090|AFLA_036110|AFLA_036440|AFLA_106350|AFLA_107840|AFLA_108930|AFLA_110930|AFLA_112010|AFLA_060530|AFLA_060700|AFLA_062260|AFLA_063160|AFLA_012050|AFLA_012080|AFLA_073320|AFLA_078420|AFLA_079230|AFLA_125680|AFLA_084230|AFLA_116430|AFLA_122560|AFLA_122570|AFLA_014490|AFLA_015920|AFLA_021700|AFLA_041420|AFLA_041430|AFLA_042390|AFLA_044400|AFL…	885	AFLA_035970|AFLA_106350|AFLA_108930|AFLA_112010|AFLA_062260|AFLA_073320|AFLA_116430|AFLA_122560|AFLA_122570|AFLA_014490|AFLA_042390|AFLA_047080|AFLA_101470|AFLA_066620|AFLA_067450|AFLA_134090	16	AFLA_024510|AFLA_024750|AFLA_030430|AFLA_036090|AFLA_036110|AFLA_036440|AFLA_107840|AFLA_110930|AFLA_060530|AFLA_060700|AFLA_063160|AFLA_012050|AFLA_012080|AFLA_078420|AFLA_079230|AFLA_125680|AFLA_084230|AFLA_015920|AFLA_021700|AFLA_041420|AFLA_041430|AFLA_044400|AFLA_044460|AFLA_099250|AFLA_099270|AFLA_099280|AFLA_065130|AFLA_066210|AFLA_071180|AFLA_049390|AFLA_005130|AFLA_138430	32	http://amigo.geneontology.org/cgi-bin/amigo/term_details?term=GO:0006082	no
divalent inorganic cation transport	GO:0072511	0.00796	1	6	AFLA_126510|AFLA_018740|AFLA_038590|AFLA_129430|AFLA_068440|AFLA_050180	46	AFLA_038590|AFLA_129430|AFLA_068440	3	AFLA_126510|AFLA_018740|AFLA_050180	3	http://amigo.geneontology.org/cgi-bin/amigo/term_details?term=GO:0072511	no
beta-ketoadipate pathway	GO:0042952	0.00845	1	2	AFLA_108330|AFLA_125090	4	AFLA_108330|AFLA_125090	2	.	0	http://amigo.geneontology.org/cgi-bin/amigo/term_details?term=GO:0042952	no
malonate catabolic process	GO:0090410	0.00845	1	2	AFLA_107840|AFLA_108930	4	AFLA_108930	1	AFLA_107840	1	http://amigo.geneontology.org/cgi-bin/amigo/term_details?term=GO:0090410	no
cellular divalent inorganic cation homeostasis	GO:0072503	0.00884	1	6	AFLA_032000|AFLA_038590|AFLA_129430|AFLA_068440|AFLA_003980|AFLA_050180	47	AFLA_032000|AFLA_038590|AFLA_129430|AFLA_068440	4	AFLA_003980|AFLA_050180	2	http://amigo.geneontology.org/cgi-bin/amigo/term_details?term=GO:0072503	no
amino sugar catabolic process	GO:0046348	0.00914	1	4	AFLA_031380|AFLA_054470|AFLA_012050|AFLA_012080	22	AFLA_031380|AFLA_054470	2	AFLA_012050|AFLA_012080	2	http://amigo.geneontology.org/cgi-bin/amigo/term_details?term=GO:0046348	no
cholesterol biosynthetic process	GO:0006695	0.00964	1	3	AFLA_030250|AFLA_065740|AFLA_138560	12	AFLA_030250|AFLA_138560	2	AFLA_065740	1	http://amigo.geneontology.org/cgi-bin/amigo/term_details?term=GO:0006695	no
alpha-amino acid metabolic process	GO:1901605	0.01233	1	20	AFLA_036090|AFLA_036110|AFLA_036440|AFLA_060530|AFLA_060700|AFLA_084230|AFLA_014490|AFLA_015920|AFLA_021700|AFLA_041420|AFLA_041430|AFLA_047080|AFLA_099250|AFLA_099270|AFLA_099280|AFLA_067450|AFLA_071180|AFLA_005130|AFLA_134090|AFLA_138430	302	AFLA_014490|AFLA_047080|AFLA_067450|AFLA_134090	4	AFLA_036090|AFLA_036110|AFLA_036440|AFLA_060530|AFLA_060700|AFLA_084230|AFLA_015920|AFLA_021700|AFLA_041420|AFLA_041430|AFLA_099250|AFLA_099270|AFLA_099280|AFLA_071180|AFLA_005130|AFLA_138430	16	http://amigo.geneontology.org/cgi-bin/amigo/term_details?term=GO:1901605	no
N-acetylglucosamine metabolic process	GO:0006044	0.01372	1	2	AFLA_012050|AFLA_012080	5	.	0	AFLA_012050|AFLA_012080	2	http://amigo.geneontology.org/cgi-bin/amigo/term_details?term=GO:0006044	no
aminoglycan metabolic process	GO:0006022	0.01429	1	6	AFLA_031380|AFLA_054470|AFLA_075840|AFLA_123350|AFLA_116430|AFLA_137200	52	AFLA_031380|AFLA_054470|AFLA_116430|AFLA_137200	4	AFLA_075840|AFLA_123350	2	http://amigo.geneontology.org/cgi-bin/amigo/term_details?term=GO:0006022	no
aminoglycan biosynthetic process	GO:0006023	0.01444	1	4	AFLA_075840|AFLA_123350|AFLA_116430|AFLA_137200	25	AFLA_116430|AFLA_137200	2	AFLA_075840|AFLA_123350	2	http://amigo.geneontology.org/cgi-bin/amigo/term_details?term=GO:0006023	no
ribosome assembly	GO:0042255	0.01455	1	5	AFLA_034340|AFLA_112090|AFLA_079160|AFLA_080140|AFLA_044170	38	.	0	AFLA_034340|AFLA_112090|AFLA_079160|AFLA_080140|AFLA_044170	5	http://amigo.geneontology.org/cgi-bin/amigo/term_details?term=GO:0042255	no
organic substance catabolic process	GO:1901575	0.01479	1	53	AFLA_023420|AFLA_023490|AFLA_024750|AFLA_028740|AFLA_029780|AFLA_031380|AFLA_035970|AFLA_036090|AFLA_036110|AFLA_036440|AFLA_107840|AFLA_108930|AFLA_110960|AFLA_060700|AFLA_062260|AFLA_063040|AFLA_063160|AFLA_063680|AFLA_054470|AFLA_124470|AFLA_011230|AFLA_012050|AFLA_012080|AFLA_073320|AFLA_125090|AFLA_125700|AFLA_081980|AFLA_082200|AFLA_087870|AFLA_120890|AFLA_122400|AFLA_122560|AFLA_122570|AFL…	1032	AFLA_023490|AFLA_028740|AFLA_029780|AFLA_031380|AFLA_035970|AFLA_108930|AFLA_110960|AFLA_062260|AFLA_054470|AFLA_011230|AFLA_073320|AFLA_125090|AFLA_087870|AFLA_120890|AFLA_122560|AFLA_122570|AFLA_093470|AFLA_018500|AFLA_042390|AFLA_101470|AFLA_102850|AFLA_067450|AFLA_003220|AFLA_003810|AFLA_134560	25	AFLA_023420|AFLA_024750|AFLA_036090|AFLA_036110|AFLA_036440|AFLA_107840|AFLA_060700|AFLA_063040|AFLA_063160|AFLA_063680|AFLA_124470|AFLA_012050|AFLA_012080|AFLA_125700|AFLA_081980|AFLA_082200|AFLA_122400|AFLA_093790|AFLA_015920|AFLA_041410|AFLA_044400|AFLA_099250|AFLA_099270|AFLA_099280|AFLA_070170|AFLA_071180|AFLA_049390|AFLA_005130	28	http://amigo.geneontology.org/cgi-bin/amigo/term_details?term=GO:1901575	no
tyrosine catabolic process	GO:0006572	0.0183	1	3	AFLA_036090|AFLA_036110|AFLA_015920	15	.	0	AFLA_036090|AFLA_036110|AFLA_015920	3	http://amigo.geneontology.org/cgi-bin/amigo/term_details?term=GO:0006572	no
translation	GO:0006412	0.01879	1	20	AFLA_050800|AFLA_030140|AFLA_031780|AFLA_034340|AFLA_111980|AFLA_112090|AFLA_054760|AFLA_056250|AFLA_075030|AFLA_079880|AFLA_080140|AFLA_127220|AFLA_041730|AFLA_043150|AFLA_044170|AFLA_045770|AFLA_101160|AFLA_068000|AFLA_002560|AFLA_131470	315	AFLA_045770	1	AFLA_050800|AFLA_030140|AFLA_031780|AFLA_034340|AFLA_111980|AFLA_112090|AFLA_054760|AFLA_056250|AFLA_075030|AFLA_079880|AFLA_080140|AFLA_127220|AFLA_041730|AFLA_043150|AFLA_044170|AFLA_101160|AFLA_068000|AFLA_002560|AFLA_131470	19	http://amigo.geneontology.org/cgi-bin/amigo/term_details?term=GO:0006412	no
glucosamine-containing compound metabolic process	GO:1901071	0.0198	1	5	AFLA_031380|AFLA_054470|AFLA_012050|AFLA_012080|AFLA_137200	41	AFLA_031380|AFLA_054470|AFLA_137200	3	AFLA_012050|AFLA_012080	2	http://amigo.geneontology.org/cgi-bin/amigo/term_details?term=GO:1901071	no
manganese ion transport	GO:0006828	0.02007	1	2	AFLA_045770|AFLA_050180	6	AFLA_045770	1	AFLA_050180	1	http://amigo.geneontology.org/cgi-bin/amigo/term_details?term=GO:0006828	no
phenylpropanoid biosynthetic process	GO:0009699	0.02007	1	2	AFLA_060700|AFLA_064290	6	.	0	AFLA_060700|AFLA_064290	2	http://amigo.geneontology.org/cgi-bin/amigo/term_details?term=GO:0009699	no
skeletal system development	GO:0001501	0.02007	1	2	AFLA_075840|AFLA_138560	6	AFLA_138560	1	AFLA_075840	1	http://amigo.geneontology.org/cgi-bin/amigo/term_details?term=GO:0001501	no
kidney development	GO:0001822	0.02007	1	2	AFLA_110340|AFLA_075840	6	AFLA_110340	1	AFLA_075840	1	http://amigo.geneontology.org/cgi-bin/amigo/term_details?term=GO:0001822	no
UDP-N-acetylglucosamine biosynthetic process	GO:0006048	0.02007	1	2	AFLA_012050|AFLA_012080	6	.	0	AFLA_012050|AFLA_012080	2	http://amigo.geneontology.org/cgi-bin/amigo/term_details?term=GO:0006048	no
renal system development	GO:0072001	0.02007	1	2	AFLA_110340|AFLA_075840	6	AFLA_110340	1	AFLA_075840	1	http://amigo.geneontology.org/cgi-bin/amigo/term_details?term=GO:0072001	no
glycosaminoglycan metabolic process	GO:0030203	0.02189	1	3	AFLA_075840|AFLA_123350|AFLA_116430	16	AFLA_116430	1	AFLA_075840|AFLA_123350	2	http://amigo.geneontology.org/cgi-bin/amigo/term_details?term=GO:0030203	no
metal ion transport	GO:0030001	0.02437	1	9	AFLA_110050|AFLA_126510|AFLA_018740|AFLA_038590|AFLA_129430|AFLA_045770|AFLA_068440|AFLA_003980|AFLA_050180	109	AFLA_038590|AFLA_129430|AFLA_045770|AFLA_068440	4	AFLA_110050|AFLA_126510|AFLA_018740|AFLA_003980|AFLA_050180	5	http://amigo.geneontology.org/cgi-bin/amigo/term_details?term=GO:0030001	no
tyrosine metabolic process	GO:0006570	0.02584	1	3	AFLA_036090|AFLA_036110|AFLA_015920	17	.	0	AFLA_036090|AFLA_036110|AFLA_015920	3	http://amigo.geneontology.org/cgi-bin/amigo/term_details?term=GO:0006570	no
sequestering of metal ion	GO:0051238	0.02584	1	3	AFLA_038590|AFLA_003980|AFLA_050180	17	AFLA_038590	1	AFLA_003980|AFLA_050180	2	http://amigo.geneontology.org/cgi-bin/amigo/term_details?term=GO:0051238	no
catecholamine metabolic process	GO:0006584	0.02739	1	2	AFLA_057420|AFLA_016930	7	AFLA_057420|AFLA_016930	2	.	0	http://amigo.geneontology.org/cgi-bin/amigo/term_details?term=GO:0006584	no
positive regulation of cytosolic calcium ion concentration	GO:0007204	0.02739	1	2	AFLA_038590|AFLA_068440	7	AFLA_038590|AFLA_068440	2	.	0	http://amigo.geneontology.org/cgi-bin/amigo/term_details?term=GO:0007204	no
calcium ion transport into cytosol	GO:0060402	0.02739	1	2	AFLA_038590|AFLA_068440	7	AFLA_038590|AFLA_068440	2	.	0	http://amigo.geneontology.org/cgi-bin/amigo/term_details?term=GO:0060402	no
cytosolic calcium ion transport	GO:0060401	0.02739	1	2	AFLA_038590|AFLA_068440	7	AFLA_038590|AFLA_068440	2	.	0	http://amigo.geneontology.org/cgi-bin/amigo/term_details?term=GO:0060401	no
regulation of cytosolic calcium ion concentration	GO:0051480	0.02739	1	2	AFLA_038590|AFLA_068440	7	AFLA_038590|AFLA_068440	2	.	0	http://amigo.geneontology.org/cgi-bin/amigo/term_details?term=GO:0051480	no
UDP-N-acetylglucosamine metabolic process	GO:0006047	0.02739	1	2	AFLA_012050|AFLA_012080	7	.	0	AFLA_012050|AFLA_012080	2	http://amigo.geneontology.org/cgi-bin/amigo/term_details?term=GO:0006047	no
catabolic process	GO:0009056	0.03039	1	58	AFLA_023420|AFLA_023490|AFLA_024750|AFLA_028740|AFLA_029780|AFLA_030430|AFLA_031380|AFLA_035970|AFLA_036090|AFLA_036110|AFLA_036440|AFLA_107840|AFLA_108330|AFLA_108930|AFLA_110960|AFLA_056250|AFLA_060700|AFLA_062260|AFLA_063040|AFLA_063160|AFLA_063680|AFLA_054470|AFLA_124470|AFLA_011230|AFLA_012050|AFLA_012080|AFLA_073320|AFLA_125090|AFLA_125700|AFLA_081980|AFLA_082200|AFLA_087870|AFLA_120890|AFL…	1193	AFLA_023490|AFLA_028740|AFLA_029780|AFLA_031380|AFLA_035970|AFLA_108330|AFLA_108930|AFLA_110960|AFLA_062260|AFLA_054470|AFLA_011230|AFLA_073320|AFLA_125090|AFLA_087870|AFLA_120890|AFLA_121450|AFLA_122560|AFLA_122570|AFLA_093470|AFLA_018500|AFLA_042390|AFLA_042910|AFLA_101470|AFLA_102850|AFLA_067450|AFLA_003220|AFLA_003810|AFLA_134560	28	AFLA_023420|AFLA_024750|AFLA_030430|AFLA_036090|AFLA_036110|AFLA_036440|AFLA_107840|AFLA_056250|AFLA_060700|AFLA_063040|AFLA_063160|AFLA_063680|AFLA_124470|AFLA_012050|AFLA_012080|AFLA_125700|AFLA_081980|AFLA_082200|AFLA_122400|AFLA_093790|AFLA_015920|AFLA_041410|AFLA_044400|AFLA_099250|AFLA_099270|AFLA_099280|AFLA_070170|AFLA_071180|AFLA_049390|AFLA_005130	30	http://amigo.geneontology.org/cgi-bin/amigo/term_details?term=GO:0009056	no
response to inorganic substance	GO:0010035	0.03203	1	7	AFLA_030430|AFLA_009750|AFLA_126510|AFLA_018740|AFLA_003980|AFLA_131330|AFLA_050180	79	AFLA_131330	1	AFLA_030430|AFLA_009750|AFLA_126510|AFLA_018740|AFLA_003980|AFLA_050180	6	http://amigo.geneontology.org/cgi-bin/amigo/term_details?term=GO:0010035	no
small molecule metabolic process	GO:0044281	0.03203	1	66	AFLA_023420|AFLA_024510|AFLA_024750|AFLA_028740|AFLA_030250|AFLA_030430|AFLA_035970|AFLA_036090|AFLA_036110|AFLA_036440|AFLA_106350|AFLA_107840|AFLA_108930|AFLA_109820|AFLA_110890|AFLA_110930|AFLA_112010|AFLA_060530|AFLA_060700|AFLA_062260|AFLA_063160|AFLA_012050|AFLA_012080|AFLA_073320|AFLA_078420|AFLA_079230|AFLA_125680|AFLA_084230|AFLA_116430|AFLA_119710|AFLA_122210|AFLA_122560|AFLA_122570|AFL…	1388	AFLA_028740|AFLA_030250|AFLA_035970|AFLA_106350|AFLA_108930|AFLA_110890|AFLA_112010|AFLA_062260|AFLA_073320|AFLA_116430|AFLA_119710|AFLA_122560|AFLA_122570|AFLA_092640|AFLA_093230|AFLA_014490|AFLA_017590|AFLA_042390|AFLA_047080|AFLA_101470|AFLA_102850|AFLA_103000|AFLA_066620|AFLA_067450|AFLA_001850|AFLA_003810|AFLA_134090|AFLA_134560|AFLA_138560	29	AFLA_023420|AFLA_024510|AFLA_024750|AFLA_030430|AFLA_036090|AFLA_036110|AFLA_036440|AFLA_107840|AFLA_109820|AFLA_110930|AFLA_060530|AFLA_060700|AFLA_063160|AFLA_012050|AFLA_012080|AFLA_078420|AFLA_079230|AFLA_125680|AFLA_084230|AFLA_122210|AFLA_093790|AFLA_015920|AFLA_021700|AFLA_041420|AFLA_041430|AFLA_044400|AFLA_044460|AFLA_099250|AFLA_099270|AFLA_099280|AFLA_065130|AFLA_065740|AFLA_066210|AFL…	37	http://amigo.geneontology.org/cgi-bin/amigo/term_details?term=GO:0044281	no
cellular metal ion homeostasis	GO:0006875	0.03305	1	8	AFLA_032000|AFLA_077030|AFLA_126510|AFLA_038590|AFLA_129430|AFLA_068440|AFLA_003980|AFLA_050180	97	AFLA_032000|AFLA_038590|AFLA_129430|AFLA_068440	4	AFLA_077030|AFLA_126510|AFLA_003980|AFLA_050180	4	http://amigo.geneontology.org/cgi-bin/amigo/term_details?term=GO:0006875	no
conidium formation	GO:0048315	0.0333	1	4	AFLA_082850|AFLA_083110|AFLA_044790|AFLA_131330	32	AFLA_083110|AFLA_044790|AFLA_131330	3	AFLA_082850	1	http://amigo.geneontology.org/cgi-bin/amigo/term_details?term=GO:0048315	no
alcohol catabolic process	GO:0046164	0.0333	1	4	AFLA_063160|AFLA_093790|AFLA_044400|AFLA_003810	32	AFLA_003810	1	AFLA_063160|AFLA_093790|AFLA_044400	3	http://amigo.geneontology.org/cgi-bin/amigo/term_details?term=GO:0046164	no
amino sugar metabolic process	GO:0006040	0.03367	1	5	AFLA_031380|AFLA_054470|AFLA_012050|AFLA_012080|AFLA_137200	47	AFLA_031380|AFLA_054470|AFLA_137200	3	AFLA_012050|AFLA_012080	2	http://amigo.geneontology.org/cgi-bin/amigo/term_details?term=GO:0006040	no
amino sugar biosynthetic process	GO:0046349	0.03481	1	3	AFLA_012050|AFLA_012080|AFLA_137200	19	AFLA_137200	1	AFLA_012050|AFLA_012080	2	http://amigo.geneontology.org/cgi-bin/amigo/term_details?term=GO:0046349	no
nucleotide-sugar biosynthetic process	GO:0009226	0.03481	1	3	AFLA_012050|AFLA_012080|AFLA_116430	19	AFLA_116430	1	AFLA_012050|AFLA_012080	2	http://amigo.geneontology.org/cgi-bin/amigo/term_details?term=GO:0009226	no
action potential	GO:0001508	0.0356	1	2	AFLA_038590|AFLA_068440	8	AFLA_038590|AFLA_068440	2	.	0	http://amigo.geneontology.org/cgi-bin/amigo/term_details?term=GO:0001508	no
quinate catabolic process	GO:0019631	0.0356	1	2	AFLA_122560|AFLA_122570	8	AFLA_122560|AFLA_122570	2	.	0	http://amigo.geneontology.org/cgi-bin/amigo/term_details?term=GO:0019631	no
lignin metabolic process	GO:0009808	0.0356	1	2	AFLA_120890|AFLA_064290	8	AFLA_120890	1	AFLA_064290	1	http://amigo.geneontology.org/cgi-bin/amigo/term_details?term=GO:0009808	no
glyoxylate metabolic process	GO:0046487	0.0356	1	2	AFLA_063160|AFLA_049390	8	.	0	AFLA_063160|AFLA_049390	2	http://amigo.geneontology.org/cgi-bin/amigo/term_details?term=GO:0046487	no
response to karrikin	GO:0080167	0.0356	1	2	AFLA_009750|AFLA_137780	8	.	0	AFLA_009750|AFLA_137780	2	http://amigo.geneontology.org/cgi-bin/amigo/term_details?term=GO:0080167	no
secondary metabolite biosynthetic process	GO:0044550	0.03614	1	12	AFLA_024750|AFLA_036110|AFLA_110890|AFLA_058760|AFLA_060700|AFLA_063420|AFLA_125270|AFLA_118100|AFLA_064290|AFLA_065570|AFLA_002920|AFLA_138050	174	AFLA_110890|AFLA_065570	2	AFLA_024750|AFLA_036110|AFLA_058760|AFLA_060700|AFLA_063420|AFLA_125270|AFLA_118100|AFLA_064290|AFLA_002920|AFLA_138050	10	http://amigo.geneontology.org/cgi-bin/amigo/term_details?term=GO:0044550	no
monocarboxylic acid metabolic process	GO:0032787	0.03756	1	22	AFLA_024510|AFLA_024750|AFLA_030430|AFLA_106350|AFLA_107840|AFLA_108930|AFLA_060700|AFLA_062260|AFLA_063160|AFLA_073320|AFLA_125680|AFLA_122560|AFLA_122570|AFLA_042390|AFLA_044460|AFLA_099270|AFLA_101470|AFLA_065130|AFLA_066620|AFLA_071180|AFLA_049390|AFLA_005130	382	AFLA_106350|AFLA_108930|AFLA_062260|AFLA_073320|AFLA_122560|AFLA_122570|AFLA_042390|AFLA_101470|AFLA_066620	9	AFLA_024510|AFLA_024750|AFLA_030430|AFLA_107840|AFLA_060700|AFLA_063160|AFLA_125680|AFLA_044460|AFLA_099270|AFLA_065130|AFLA_071180|AFLA_049390|AFLA_005130	13	http://amigo.geneontology.org/cgi-bin/amigo/term_details?term=GO:0032787	no
regulation of interleukin-10 production	GO:0032653	0.03858	1	1	AFLA_071180	1	.	0	AFLA_071180	1	http://amigo.geneontology.org/cgi-bin/amigo/term_details?term=GO:0032653	no
red or far-red light signaling pathway	GO:0010017	0.03858	1	1	AFLA_065850	1	AFLA_065850	1	.	0	http://amigo.geneontology.org/cgi-bin/amigo/term_details?term=GO:0010017	no
DNA replication termination	GO:0006274	0.03858	1	1	AFLA_073340	1	AFLA_073340	1	.	0	http://amigo.geneontology.org/cgi-bin/amigo/term_details?term=GO:0006274	no
pyridoxal phosphate transport	GO:0031921	0.03858	1	1	AFLA_045770	1	AFLA_045770	1	.	0	http://amigo.geneontology.org/cgi-bin/amigo/term_details?term=GO:0031921	no
regulation of monocyte aggregation	GO:1900623	0.03858	1	1	AFLA_075840	1	.	0	AFLA_075840	1	http://amigo.geneontology.org/cgi-bin/amigo/term_details?term=GO:1900623	no
positive regulation of monocyte aggregation	GO:1900625	0.03858	1	1	AFLA_075840	1	.	0	AFLA_075840	1	http://amigo.geneontology.org/cgi-bin/amigo/term_details?term=GO:1900625	no
leukocyte aggregation	GO:0070486	0.03858	1	1	AFLA_075840	1	.	0	AFLA_075840	1	http://amigo.geneontology.org/cgi-bin/amigo/term_details?term=GO:0070486	no
monocyte aggregation	GO:0070487	0.03858	1	1	AFLA_075840	1	.	0	AFLA_075840	1	http://amigo.geneontology.org/cgi-bin/amigo/term_details?term=GO:0070487	no
glycine biosynthetic process, by transamination of glyoxylate	GO:0019265	0.03858	1	1	AFLA_021700	1	.	0	AFLA_021700	1	http://amigo.geneontology.org/cgi-bin/amigo/term_details?term=GO:0019265	no
negative regulation of leukocyte proliferation	GO:0070664	0.03858	1	1	AFLA_071180	1	.	0	AFLA_071180	1	http://amigo.geneontology.org/cgi-bin/amigo/term_details?term=GO:0070664	no
regulation of interleukin-12 production	GO:0032655	0.03858	1	1	AFLA_071180	1	.	0	AFLA_071180	1	http://amigo.geneontology.org/cgi-bin/amigo/term_details?term=GO:0032655	no
response to fluid shear stress	GO:0034405	0.03858	1	1	AFLA_075840	1	.	0	AFLA_075840	1	http://amigo.geneontology.org/cgi-bin/amigo/term_details?term=GO:0034405	no
alanine biosynthetic process	GO:0006523	0.03858	1	1	AFLA_036440	1	.	0	AFLA_036440	1	http://amigo.geneontology.org/cgi-bin/amigo/term_details?term=GO:0006523	no
alanine catabolic process	GO:0006524	0.03858	1	1	AFLA_036440	1	.	0	AFLA_036440	1	http://amigo.geneontology.org/cgi-bin/amigo/term_details?term=GO:0006524	no
basipetal auxin transport	GO:0010540	0.03858	1	1	AFLA_009750	1	.	0	AFLA_009750	1	http://amigo.geneontology.org/cgi-bin/amigo/term_details?term=GO:0010540	no
L-alanine metabolic process	GO:0042851	0.03858	1	1	AFLA_036440	1	.	0	AFLA_036440	1	http://amigo.geneontology.org/cgi-bin/amigo/term_details?term=GO:0042851	no
L-alanine catabolic process	GO:0042853	0.03858	1	1	AFLA_036440	1	.	0	AFLA_036440	1	http://amigo.geneontology.org/cgi-bin/amigo/term_details?term=GO:0042853	no
tolerance induction	GO:0002507	0.03858	1	1	AFLA_071180	1	.	0	AFLA_071180	1	http://amigo.geneontology.org/cgi-bin/amigo/term_details?term=GO:0002507	no
cytokine production involved in inflammatory response	GO:0002534	0.03858	1	1	AFLA_071180	1	.	0	AFLA_071180	1	http://amigo.geneontology.org/cgi-bin/amigo/term_details?term=GO:0002534	no
swimming behavior	GO:0036269	0.03858	1	1	AFLA_071180	1	.	0	AFLA_071180	1	http://amigo.geneontology.org/cgi-bin/amigo/term_details?term=GO:0036269	no
interleukin-10 production	GO:0032613	0.03858	1	1	AFLA_071180	1	.	0	AFLA_071180	1	http://amigo.geneontology.org/cgi-bin/amigo/term_details?term=GO:0032613	no
glycolate catabolic process	GO:0046296	0.03858	1	1	AFLA_063160	1	.	0	AFLA_063160	1	http://amigo.geneontology.org/cgi-bin/amigo/term_details?term=GO:0046296	no
positive regulation of inflammatory response	GO:0050729	0.03858	1	1	AFLA_071180	1	.	0	AFLA_071180	1	http://amigo.geneontology.org/cgi-bin/amigo/term_details?term=GO:0050729	no
regulation of eclosion	GO:0007563	0.03858	1	1	AFLA_099280	1	.	0	AFLA_099280	1	http://amigo.geneontology.org/cgi-bin/amigo/term_details?term=GO:0007563	no
eclosion	GO:0007562	0.03858	1	1	AFLA_099280	1	.	0	AFLA_099280	1	http://amigo.geneontology.org/cgi-bin/amigo/term_details?term=GO:0007562	no
regulation of leukocyte apoptotic process	GO:2000106	0.03858	1	1	AFLA_071180	1	.	0	AFLA_071180	1	http://amigo.geneontology.org/cgi-bin/amigo/term_details?term=GO:2000106	no
negative regulation of leukocyte apoptotic process	GO:2000107	0.03858	1	1	AFLA_071180	1	.	0	AFLA_071180	1	http://amigo.geneontology.org/cgi-bin/amigo/term_details?term=GO:2000107	no
positive regulation of leukocyte apoptotic process	GO:2000108	0.03858	1	1	AFLA_071180	1	.	0	AFLA_071180	1	http://amigo.geneontology.org/cgi-bin/amigo/term_details?term=GO:2000108	no
cellular response to platelet-derived growth factor stimulus	GO:0036120	0.03858	1	1	AFLA_075840	1	.	0	AFLA_075840	1	http://amigo.geneontology.org/cgi-bin/amigo/term_details?term=GO:0036120	no
atrioventricular canal development	GO:0036302	0.03858	1	1	AFLA_075840	1	.	0	AFLA_075840	1	http://amigo.geneontology.org/cgi-bin/amigo/term_details?term=GO:0036302	no
negative regulation of protein folding	GO:1903333	0.03858	1	1	AFLA_093230	1	AFLA_093230	1	.	0	http://amigo.geneontology.org/cgi-bin/amigo/term_details?term=GO:1903333	no
positive regulation of hyaluronan biosynthetic process	GO:1900127	0.03858	1	1	AFLA_075840	1	.	0	AFLA_075840	1	http://amigo.geneontology.org/cgi-bin/amigo/term_details?term=GO:1900127	no
negative regulation of T cell proliferation	GO:0042130	0.03858	1	1	AFLA_071180	1	.	0	AFLA_071180	1	http://amigo.geneontology.org/cgi-bin/amigo/term_details?term=GO:0042130	no
negative regulation of T cell apoptotic process	GO:0070233	0.03858	1	1	AFLA_071180	1	.	0	AFLA_071180	1	http://amigo.geneontology.org/cgi-bin/amigo/term_details?term=GO:0070233	no
regulation of T cell apoptotic process	GO:0070232	0.03858	1	1	AFLA_071180	1	.	0	AFLA_071180	1	http://amigo.geneontology.org/cgi-bin/amigo/term_details?term=GO:0070232	no
sensory perception of light stimulus	GO:0050953	0.03858	1	1	AFLA_093230	1	AFLA_093230	1	.	0	http://amigo.geneontology.org/cgi-bin/amigo/term_details?term=GO:0050953	no
pyruvate family amino acid biosynthetic process	GO:0009079	0.03858	1	1	AFLA_036440	1	.	0	AFLA_036440	1	http://amigo.geneontology.org/cgi-bin/amigo/term_details?term=GO:0009079	no
regulation of lymphocyte apoptotic process	GO:0070228	0.03858	1	1	AFLA_071180	1	.	0	AFLA_071180	1	http://amigo.geneontology.org/cgi-bin/amigo/term_details?term=GO:0070228	no
negative regulation of lymphocyte apoptotic process	GO:0070229	0.03858	1	1	AFLA_071180	1	.	0	AFLA_071180	1	http://amigo.geneontology.org/cgi-bin/amigo/term_details?term=GO:0070229	no
estrous cycle	GO:0044849	0.03858	1	1	AFLA_075840	1	.	0	AFLA_075840	1	http://amigo.geneontology.org/cgi-bin/amigo/term_details?term=GO:0044849	no
positive regulation of tolerance induction	GO:0002645	0.03858	1	1	AFLA_071180	1	.	0	AFLA_071180	1	http://amigo.geneontology.org/cgi-bin/amigo/term_details?term=GO:0002645	no
regulation of tolerance induction	GO:0002643	0.03858	1	1	AFLA_071180	1	.	0	AFLA_071180	1	http://amigo.geneontology.org/cgi-bin/amigo/term_details?term=GO:0002643	no
establishment of imprinting at mating-type locus	GO:0071516	0.03858	1	1	AFLA_073340	1	AFLA_073340	1	.	0	http://amigo.geneontology.org/cgi-bin/amigo/term_details?term=GO:0071516	no
genetic imprinting at mating-type locus	GO:0071515	0.03858	1	1	AFLA_073340	1	AFLA_073340	1	.	0	http://amigo.geneontology.org/cgi-bin/amigo/term_details?term=GO:0071515	no
genetic imprinting	GO:0071514	0.03858	1	1	AFLA_073340	1	AFLA_073340	1	.	0	http://amigo.geneontology.org/cgi-bin/amigo/term_details?term=GO:0071514	no
negative regulation of interleukin-10 production	GO:0032693	0.03858	1	1	AFLA_071180	1	.	0	AFLA_071180	1	http://amigo.geneontology.org/cgi-bin/amigo/term_details?term=GO:0032693	no
L-fucose catabolic process	GO:0042355	0.03858	1	1	AFLA_041410	1	.	0	AFLA_041410	1	http://amigo.geneontology.org/cgi-bin/amigo/term_details?term=GO:0042355	no
hyaluronan biosynthetic process	GO:0030213	0.03858	1	1	AFLA_075840	1	.	0	AFLA_075840	1	http://amigo.geneontology.org/cgi-bin/amigo/term_details?term=GO:0030213	no
hyaluronan metabolic process	GO:0030212	0.03858	1	1	AFLA_075840	1	.	0	AFLA_075840	1	http://amigo.geneontology.org/cgi-bin/amigo/term_details?term=GO:0030212	no
regulation of vesicle targeting, to, from or within Golgi	GO:0048209	0.03858	1	1	AFLA_069190	1	AFLA_069190	1	.	0	http://amigo.geneontology.org/cgi-bin/amigo/term_details?term=GO:0048209	no
lignin biosynthetic process	GO:0009809	0.03858	1	1	AFLA_064290	1	.	0	AFLA_064290	1	http://amigo.geneontology.org/cgi-bin/amigo/term_details?term=GO:0009809	no
positive regulation of T cell apoptotic process	GO:0070234	0.03858	1	1	AFLA_071180	1	.	0	AFLA_071180	1	http://amigo.geneontology.org/cgi-bin/amigo/term_details?term=GO:0070234	no
kynurenic acid metabolic process	GO:0034275	0.03858	1	1	AFLA_071180	1	.	0	AFLA_071180	1	http://amigo.geneontology.org/cgi-bin/amigo/term_details?term=GO:0034275	no
kynurenic acid biosynthetic process	GO:0034276	0.03858	1	1	AFLA_071180	1	.	0	AFLA_071180	1	http://amigo.geneontology.org/cgi-bin/amigo/term_details?term=GO:0034276	no
endocardial cushion to mesenchymal transition	GO:0090500	0.03858	1	1	AFLA_075840	1	.	0	AFLA_075840	1	http://amigo.geneontology.org/cgi-bin/amigo/term_details?term=GO:0090500	no
negative regulation of mononuclear cell proliferation	GO:0032945	0.03858	1	1	AFLA_071180	1	.	0	AFLA_071180	1	http://amigo.geneontology.org/cgi-bin/amigo/term_details?term=GO:0032945	no
response to platelet-derived growth factor	GO:0036119	0.03858	1	1	AFLA_075840	1	.	0	AFLA_075840	1	http://amigo.geneontology.org/cgi-bin/amigo/term_details?term=GO:0036119	no
cell cycle DNA replication termination	GO:1902294	0.03858	1	1	AFLA_073340	1	AFLA_073340	1	.	0	http://amigo.geneontology.org/cgi-bin/amigo/term_details?term=GO:1902294	no
glucosamine catabolic process	GO:0006043	0.03858	1	1	AFLA_012080	1	.	0	AFLA_012080	1	http://amigo.geneontology.org/cgi-bin/amigo/term_details?term=GO:0006043	no
glucosamine metabolic process	GO:0006041	0.03858	1	1	AFLA_012080	1	.	0	AFLA_012080	1	http://amigo.geneontology.org/cgi-bin/amigo/term_details?term=GO:0006041	no
leukocyte cell-cell adhesion	GO:0007159	0.03858	1	1	AFLA_075840	1	.	0	AFLA_075840	1	http://amigo.geneontology.org/cgi-bin/amigo/term_details?term=GO:0007159	no
red, far-red light phototransduction	GO:0009585	0.03858	1	1	AFLA_065850	1	AFLA_065850	1	.	0	http://amigo.geneontology.org/cgi-bin/amigo/term_details?term=GO:0009585	no
detection of visible light	GO:0009584	0.03858	1	1	AFLA_065850	1	AFLA_065850	1	.	0	http://amigo.geneontology.org/cgi-bin/amigo/term_details?term=GO:0009584	no
positive regulation of interleukin-12 production	GO:0032735	0.03858	1	1	AFLA_071180	1	.	0	AFLA_071180	1	http://amigo.geneontology.org/cgi-bin/amigo/term_details?term=GO:0032735	no
fucose catabolic process	GO:0019317	0.03858	1	1	AFLA_041410	1	.	0	AFLA_041410	1	http://amigo.geneontology.org/cgi-bin/amigo/term_details?term=GO:0019317	no
negative regulation of leukocyte activation	GO:0002695	0.03858	1	1	AFLA_071180	1	.	0	AFLA_071180	1	http://amigo.geneontology.org/cgi-bin/amigo/term_details?term=GO:0002695	no
type 2 immune response	GO:0042092	0.03858	1	1	AFLA_071180	1	.	0	AFLA_071180	1	http://amigo.geneontology.org/cgi-bin/amigo/term_details?term=GO:0042092	no
acetate fermentation	GO:0019654	0.03858	1	1	AFLA_005130	1	.	0	AFLA_005130	1	http://amigo.geneontology.org/cgi-bin/amigo/term_details?term=GO:0019654	no
L-lysine catabolic process to acetate	GO:0019475	0.03858	1	1	AFLA_005130	1	.	0	AFLA_005130	1	http://amigo.geneontology.org/cgi-bin/amigo/term_details?term=GO:0019475	no
anaerobic amino acid catabolic process	GO:0019665	0.03858	1	1	AFLA_005130	1	.	0	AFLA_005130	1	http://amigo.geneontology.org/cgi-bin/amigo/term_details?term=GO:0019665	no
multicellular organismal response to stress	GO:0033555	0.03858	1	1	AFLA_071180	1	.	0	AFLA_071180	1	http://amigo.geneontology.org/cgi-bin/amigo/term_details?term=GO:0033555	no
regulation of protein folding	GO:1903332	0.03858	1	1	AFLA_093230	1	AFLA_093230	1	.	0	http://amigo.geneontology.org/cgi-bin/amigo/term_details?term=GO:1903332	no
regulation of protein refolding	GO:0061083	0.03858	1	1	AFLA_093230	1	AFLA_093230	1	.	0	http://amigo.geneontology.org/cgi-bin/amigo/term_details?term=GO:0061083	no
negative regulation of protein refolding	GO:0061084	0.03858	1	1	AFLA_093230	1	AFLA_093230	1	.	0	http://amigo.geneontology.org/cgi-bin/amigo/term_details?term=GO:0061084	no
visual perception	GO:0007601	0.03858	1	1	AFLA_093230	1	AFLA_093230	1	.	0	http://amigo.geneontology.org/cgi-bin/amigo/term_details?term=GO:0007601	no
positive regulation of keratinocyte proliferation	GO:0010838	0.03858	1	1	AFLA_075840	1	.	0	AFLA_075840	1	http://amigo.geneontology.org/cgi-bin/amigo/term_details?term=GO:0010838	no
calcium ion import across plasma membrane	GO:0098703	0.03858	1	1	AFLA_068440	1	AFLA_068440	1	.	0	http://amigo.geneontology.org/cgi-bin/amigo/term_details?term=GO:0098703	no
cellular response to red or far red light	GO:0071489	0.03858	1	1	AFLA_065850	1	AFLA_065850	1	.	0	http://amigo.geneontology.org/cgi-bin/amigo/term_details?term=GO:0071489	no
positive regulation of T cell tolerance induction	GO:0002666	0.03858	1	1	AFLA_071180	1	.	0	AFLA_071180	1	http://amigo.geneontology.org/cgi-bin/amigo/term_details?term=GO:0002666	no
regulation of T cell tolerance induction	GO:0002664	0.03858	1	1	AFLA_071180	1	.	0	AFLA_071180	1	http://amigo.geneontology.org/cgi-bin/amigo/term_details?term=GO:0002664	no
cellular response to fluid shear stress	GO:0071498	0.03858	1	1	AFLA_075840	1	.	0	AFLA_075840	1	http://amigo.geneontology.org/cgi-bin/amigo/term_details?term=GO:0071498	no
auxin polar transport	GO:0009926	0.03858	1	1	AFLA_009750	1	.	0	AFLA_009750	1	http://amigo.geneontology.org/cgi-bin/amigo/term_details?term=GO:0009926	no
negative regulation of lymphocyte activation	GO:0051250	0.03858	1	1	AFLA_071180	1	.	0	AFLA_071180	1	http://amigo.geneontology.org/cgi-bin/amigo/term_details?term=GO:0051250	no
regulation of chronic inflammatory response	GO:0002676	0.03858	1	1	AFLA_071180	1	.	0	AFLA_071180	1	http://amigo.geneontology.org/cgi-bin/amigo/term_details?term=GO:0002676	no
positive regulation of chronic inflammatory response	GO:0002678	0.03858	1	1	AFLA_071180	1	.	0	AFLA_071180	1	http://amigo.geneontology.org/cgi-bin/amigo/term_details?term=GO:0002678	no
heterotrimeric G-protein complex assembly	GO:1902605	0.03858	1	1	AFLA_093230	1	AFLA_093230	1	.	0	http://amigo.geneontology.org/cgi-bin/amigo/term_details?term=GO:1902605	no
histone H3-S10 phosphorylation involved in chromosome condensation	GO:2000775	0.03858	1	1	AFLA_047300	1	.	0	AFLA_047300	1	http://amigo.geneontology.org/cgi-bin/amigo/term_details?term=GO:2000775	no
keratinocyte proliferation	GO:0043616	0.03858	1	1	AFLA_075840	1	.	0	AFLA_075840	1	http://amigo.geneontology.org/cgi-bin/amigo/term_details?term=GO:0043616	no
chronic inflammatory response	GO:0002544	0.03858	1	1	AFLA_071180	1	.	0	AFLA_071180	1	http://amigo.geneontology.org/cgi-bin/amigo/term_details?term=GO:0002544	no
positive regulation of urine volume	GO:0035810	0.03858	1	1	AFLA_075840	1	.	0	AFLA_075840	1	http://amigo.geneontology.org/cgi-bin/amigo/term_details?term=GO:0035810	no
mitotic DNA replication termination	GO:1902979	0.03858	1	1	AFLA_073340	1	AFLA_073340	1	.	0	http://amigo.geneontology.org/cgi-bin/amigo/term_details?term=GO:1902979	no
organism emergence from protective structure	GO:0071684	0.03858	1	1	AFLA_099280	1	.	0	AFLA_099280	1	http://amigo.geneontology.org/cgi-bin/amigo/term_details?term=GO:0071684	no
starch catabolic process	GO:0005983	0.03858	1	1	AFLA_023490	1	AFLA_023490	1	.	0	http://amigo.geneontology.org/cgi-bin/amigo/term_details?term=GO:0005983	no
regulation of hyaluronan biosynthetic process	GO:1900125	0.03858	1	1	AFLA_075840	1	.	0	AFLA_075840	1	http://amigo.geneontology.org/cgi-bin/amigo/term_details?term=GO:1900125	no
cardiac epithelial to mesenchymal transition	GO:0060317	0.03858	1	1	AFLA_075840	1	.	0	AFLA_075840	1	http://amigo.geneontology.org/cgi-bin/amigo/term_details?term=GO:0060317	no
regulation of keratinocyte proliferation	GO:0010837	0.03858	1	1	AFLA_075840	1	.	0	AFLA_075840	1	http://amigo.geneontology.org/cgi-bin/amigo/term_details?term=GO:0010837	no
positive regulation of keratinocyte migration	GO:0051549	0.03858	1	1	AFLA_075840	1	.	0	AFLA_075840	1	http://amigo.geneontology.org/cgi-bin/amigo/term_details?term=GO:0051549	no
keratinocyte migration	GO:0051546	0.03858	1	1	AFLA_075840	1	.	0	AFLA_075840	1	http://amigo.geneontology.org/cgi-bin/amigo/term_details?term=GO:0051546	no
regulation of keratinocyte migration	GO:0051547	0.03858	1	1	AFLA_075840	1	.	0	AFLA_075840	1	http://amigo.geneontology.org/cgi-bin/amigo/term_details?term=GO:0051547	no
calcium ion import into cell	GO:1990035	0.03858	1	1	AFLA_068440	1	AFLA_068440	1	.	0	http://amigo.geneontology.org/cgi-bin/amigo/term_details?term=GO:1990035	no
protein biotinylation	GO:0009305	0.03858	1	1	AFLA_045250	1	AFLA_045250	1	.	0	http://amigo.geneontology.org/cgi-bin/amigo/term_details?term=GO:0009305	no
T cell tolerance induction	GO:0002517	0.03858	1	1	AFLA_071180	1	.	0	AFLA_071180	1	http://amigo.geneontology.org/cgi-bin/amigo/term_details?term=GO:0002517	no
interleukin-12 production	GO:0032615	0.03858	1	1	AFLA_071180	1	.	0	AFLA_071180	1	http://amigo.geneontology.org/cgi-bin/amigo/term_details?term=GO:0032615	no
nuclear DNA replication termination	GO:1902317	0.03858	1	1	AFLA_073340	1	AFLA_073340	1	.	0	http://amigo.geneontology.org/cgi-bin/amigo/term_details?term=GO:1902317	no
site-specific DNA replication termination at RTS1 barrier	GO:0071171	0.03858	1	1	AFLA_073340	1	AFLA_073340	1	.	0	http://amigo.geneontology.org/cgi-bin/amigo/term_details?term=GO:0071171	no
site-specific DNA replication termination	GO:0071170	0.03858	1	1	AFLA_073340	1	AFLA_073340	1	.	0	http://amigo.geneontology.org/cgi-bin/amigo/term_details?term=GO:0071170	no
positive regulation of lymphocyte apoptotic process	GO:0070230	0.03858	1	1	AFLA_071180	1	.	0	AFLA_071180	1	http://amigo.geneontology.org/cgi-bin/amigo/term_details?term=GO:0070230	no
regulation of type 2 immune response	GO:0002828	0.03858	1	1	AFLA_071180	1	.	0	AFLA_071180	1	http://amigo.geneontology.org/cgi-bin/amigo/term_details?term=GO:0002828	no
L-ascorbic acid metabolic process	GO:0019852	0.03858	1	1	AFLA_044400	1	.	0	AFLA_044400	1	http://amigo.geneontology.org/cgi-bin/amigo/term_details?term=GO:0019852	no
L-ascorbic acid biosynthetic process	GO:0019853	0.03858	1	1	AFLA_044400	1	.	0	AFLA_044400	1	http://amigo.geneontology.org/cgi-bin/amigo/term_details?term=GO:0019853	no
L-fucose metabolic process	GO:0042354	0.03858	1	1	AFLA_041410	1	.	0	AFLA_041410	1	http://amigo.geneontology.org/cgi-bin/amigo/term_details?term=GO:0042354	no
negative regulation of lymphocyte proliferation	GO:0050672	0.03858	1	1	AFLA_071180	1	.	0	AFLA_071180	1	http://amigo.geneontology.org/cgi-bin/amigo/term_details?term=GO:0050672	no
negative regulation of T cell activation	GO:0050868	0.03858	1	1	AFLA_071180	1	.	0	AFLA_071180	1	http://amigo.geneontology.org/cgi-bin/amigo/term_details?term=GO:0050868	no
negative regulation of cell activation	GO:0050866	0.03858	1	1	AFLA_071180	1	.	0	AFLA_071180	1	http://amigo.geneontology.org/cgi-bin/amigo/term_details?term=GO:0050866	no
positive regulation of type 2 immune response	GO:0002830	0.03858	1	1	AFLA_071180	1	.	0	AFLA_071180	1	http://amigo.geneontology.org/cgi-bin/amigo/term_details?term=GO:0002830	no
regulation of leukocyte cell-cell adhesion	GO:1903037	0.03858	1	1	AFLA_075840	1	.	0	AFLA_075840	1	http://amigo.geneontology.org/cgi-bin/amigo/term_details?term=GO:1903037	no
pyruvate family amino acid catabolic process	GO:0009080	0.03858	1	1	AFLA_036440	1	.	0	AFLA_036440	1	http://amigo.geneontology.org/cgi-bin/amigo/term_details?term=GO:0009080	no
positive regulation of leukocyte cell-cell adhesion	GO:1903039	0.03858	1	1	AFLA_075840	1	.	0	AFLA_075840	1	http://amigo.geneontology.org/cgi-bin/amigo/term_details?term=GO:1903039	no
regulation of urine volume	GO:0035809	0.03858	1	1	AFLA_075840	1	.	0	AFLA_075840	1	http://amigo.geneontology.org/cgi-bin/amigo/term_details?term=GO:0035809	no
ribonucleoprotein complex assembly	GO:0022618	0.0386	1	8	AFLA_034340|AFLA_111980|AFLA_112090|AFLA_079160|AFLA_080140|AFLA_041730|AFLA_044170|AFLA_131470	100	.	0	AFLA_034340|AFLA_111980|AFLA_112090|AFLA_079160|AFLA_080140|AFLA_041730|AFLA_044170|AFLA_131470	8	http://amigo.geneontology.org/cgi-bin/amigo/term_details?term=GO:0022618	no
branched-chain amino acid metabolic process	GO:0009081	0.03936	1	5	AFLA_015920|AFLA_099250|AFLA_099270|AFLA_099280|AFLA_134090	49	AFLA_134090	1	AFLA_015920|AFLA_099250|AFLA_099270|AFLA_099280	4	http://amigo.geneontology.org/cgi-bin/amigo/term_details?term=GO:0009081	no
cholesterol metabolic process	GO:0008203	0.03982	1	3	AFLA_030250|AFLA_065740|AFLA_138560	20	AFLA_030250|AFLA_138560	2	AFLA_065740	1	http://amigo.geneontology.org/cgi-bin/amigo/term_details?term=GO:0008203	no
quinate metabolic process	GO:0019630	0.04047	1	4	AFLA_024510|AFLA_125680|AFLA_122560|AFLA_122570	34	AFLA_122560|AFLA_122570	2	AFLA_024510|AFLA_125680	2	http://amigo.geneontology.org/cgi-bin/amigo/term_details?term=GO:0019630	no
cellular amino acid metabolic process	GO:0006520	0.04385	1	25	AFLA_035970|AFLA_036090|AFLA_036110|AFLA_036440|AFLA_110930|AFLA_112010|AFLA_060530|AFLA_060700|AFLA_079230|AFLA_084230|AFLA_014490|AFLA_015920|AFLA_021700|AFLA_041420|AFLA_041430|AFLA_047080|AFLA_099250|AFLA_099270|AFLA_099280|AFLA_066210|AFLA_067450|AFLA_071180|AFLA_005130|AFLA_134090|AFLA_138430	454	AFLA_035970|AFLA_112010|AFLA_014490|AFLA_047080|AFLA_067450|AFLA_134090	6	AFLA_036090|AFLA_036110|AFLA_036440|AFLA_110930|AFLA_060530|AFLA_060700|AFLA_079230|AFLA_084230|AFLA_015920|AFLA_021700|AFLA_041420|AFLA_041430|AFLA_099250|AFLA_099270|AFLA_099280|AFLA_066210|AFLA_071180|AFLA_005130|AFLA_138430	19	http://amigo.geneontology.org/cgi-bin/amigo/term_details?term=GO:0006520	no
acetate metabolic process	GO:0006083	0.04462	1	2	AFLA_049390|AFLA_005130	9	.	0	AFLA_049390|AFLA_005130	2	http://amigo.geneontology.org/cgi-bin/amigo/term_details?term=GO:0006083	no
extracellular structure organization	GO:0043062	0.04462	1	2	AFLA_075840|AFLA_077580	9	AFLA_077580	1	AFLA_075840	1	http://amigo.geneontology.org/cgi-bin/amigo/term_details?term=GO:0043062	no
extracellular matrix organization	GO:0030198	0.04462	1	2	AFLA_075840|AFLA_077580	9	AFLA_077580	1	AFLA_075840	1	http://amigo.geneontology.org/cgi-bin/amigo/term_details?term=GO:0030198	no
urogenital system development	GO:0001655	0.04462	1	2	AFLA_110340|AFLA_075840	9	AFLA_110340	1	AFLA_075840	1	http://amigo.geneontology.org/cgi-bin/amigo/term_details?term=GO:0001655	no
calcium-mediated signaling	GO:0019722	0.04462	1	2	AFLA_038590|AFLA_068440	9	AFLA_038590|AFLA_068440	2	.	0	http://amigo.geneontology.org/cgi-bin/amigo/term_details?term=GO:0019722	no
ribosomal large subunit assembly	GO:0000027	0.04517	1	3	AFLA_112090|AFLA_079160|AFLA_080140	21	.	0	AFLA_112090|AFLA_079160|AFLA_080140	3	http://amigo.geneontology.org/cgi-bin/amigo/term_details?term=GO:0000027	no
phenylpropanoid metabolic process	GO:0009698	0.04517	1	3	AFLA_060700|AFLA_120890|AFLA_064290	21	AFLA_120890	1	AFLA_060700|AFLA_064290	2	http://amigo.geneontology.org/cgi-bin/amigo/term_details?term=GO:0009698	no
response to metal ion	GO:0010038	0.0456	1	5	AFLA_126510|AFLA_018740|AFLA_003980|AFLA_131330|AFLA_050180	51	AFLA_131330	1	AFLA_126510|AFLA_018740|AFLA_003980|AFLA_050180	4	http://amigo.geneontology.org/cgi-bin/amigo/term_details?term=GO:0010038	no
organic cyclic compound catabolic process	GO:1901361	0.04821	1	16	AFLA_023420|AFLA_024750|AFLA_036090|AFLA_036110|AFLA_060700|AFLA_062260|AFLA_063160|AFLA_125090|AFLA_120890|AFLA_122560|AFLA_122570|AFLA_093470|AFLA_015920|AFLA_102850|AFLA_071180|AFLA_134560	264	AFLA_062260|AFLA_125090|AFLA_120890|AFLA_122560|AFLA_122570|AFLA_093470|AFLA_102850|AFLA_134560	8	AFLA_023420|AFLA_024750|AFLA_036090|AFLA_036110|AFLA_060700|AFLA_063160|AFLA_015920|AFLA_071180	8	http://amigo.geneontology.org/cgi-bin/amigo/term_details?term=GO:1901361	no
ribonucleoprotein complex subunit organization	GO:0071826	0.0492	1	8	AFLA_034340|AFLA_111980|AFLA_112090|AFLA_079160|AFLA_080140|AFLA_041730|AFLA_044170|AFLA_131470	105	.	0	AFLA_034340|AFLA_111980|AFLA_112090|AFLA_079160|AFLA_080140|AFLA_041730|AFLA_044170|AFLA_131470	8	http://amigo.geneontology.org/cgi-bin/amigo/term_details?term=GO:0071826	no
small molecule biosynthetic process	GO:0044283	0.05144	1	29	AFLA_024750|AFLA_030250|AFLA_030430|AFLA_036440|AFLA_106350|AFLA_107840|AFLA_108930|AFLA_110890|AFLA_110930|AFLA_060530|AFLA_060700|AFLA_079230|AFLA_084230|AFLA_116430|AFLA_119710|AFLA_122210|AFLA_122560|AFLA_021700|AFLA_041430|AFLA_044400|AFLA_044460|AFLA_103000|AFLA_065130|AFLA_065740|AFLA_066210|AFLA_066620|AFLA_071180|AFLA_134090|AFLA_138560	551	AFLA_030250|AFLA_106350|AFLA_108930|AFLA_110890|AFLA_116430|AFLA_119710|AFLA_122560|AFLA_103000|AFLA_066620|AFLA_134090|AFLA_138560	11	AFLA_024750|AFLA_030430|AFLA_036440|AFLA_107840|AFLA_110930|AFLA_060530|AFLA_060700|AFLA_079230|AFLA_084230|AFLA_122210|AFLA_021700|AFLA_041430|AFLA_044400|AFLA_044460|AFLA_065130|AFLA_065740|AFLA_066210|AFLA_071180	18	http://amigo.geneontology.org/cgi-bin/amigo/term_details?term=GO:0044283	no
melanin biosynthetic process	GO:0042438	0.05439	1	2	AFLA_036110|AFLA_125270	10	.	0	AFLA_036110|AFLA_125270	2	http://amigo.geneontology.org/cgi-bin/amigo/term_details?term=GO:0042438	no
calcium ion transmembrane transport	GO:0070588	0.05439	1	2	AFLA_038590|AFLA_068440	10	AFLA_038590|AFLA_068440	2	.	0	http://amigo.geneontology.org/cgi-bin/amigo/term_details?term=GO:0070588	no
hormone transport	GO:0009914	0.05439	1	2	AFLA_028740|AFLA_009750	10	AFLA_028740	1	AFLA_009750	1	http://amigo.geneontology.org/cgi-bin/amigo/term_details?term=GO:0009914	no
regulation of translational initiation	GO:0006446	0.05688	1	3	AFLA_031780|AFLA_041730|AFLA_131470	23	.	0	AFLA_031780|AFLA_041730|AFLA_131470	3	http://amigo.geneontology.org/cgi-bin/amigo/term_details?term=GO:0006446	no
monocarboxylic acid catabolic process	GO:0072329	0.05892	1	8	AFLA_024750|AFLA_062260|AFLA_063160|AFLA_073320|AFLA_122560|AFLA_122570|AFLA_099270|AFLA_049390	109	AFLA_062260|AFLA_073320|AFLA_122560|AFLA_122570	4	AFLA_024750|AFLA_063160|AFLA_099270|AFLA_049390	4	http://amigo.geneontology.org/cgi-bin/amigo/term_details?term=GO:0072329	no
cytoplasmic translation	GO:0002181	0.05977	1	5	AFLA_030140|AFLA_034340|AFLA_054760|AFLA_056250|AFLA_079880	55	.	0	AFLA_030140|AFLA_034340|AFLA_054760|AFLA_056250|AFLA_079880	5	http://amigo.geneontology.org/cgi-bin/amigo/term_details?term=GO:0002181	no
monosaccharide biosynthetic process	GO:0046364	0.06321	1	3	AFLA_035030|AFLA_112010|AFLA_044400	24	AFLA_035030|AFLA_112010	2	AFLA_044400	1	http://amigo.geneontology.org/cgi-bin/amigo/term_details?term=GO:0046364	no
nucleotide-sugar metabolic process	GO:0009225	0.06321	1	3	AFLA_012050|AFLA_012080|AFLA_116430	24	AFLA_116430	1	AFLA_012050|AFLA_012080	2	http://amigo.geneontology.org/cgi-bin/amigo/term_details?term=GO:0009225	no
catechol-containing compound metabolic process	GO:0009712	0.06321	1	3	AFLA_057420|AFLA_125090|AFLA_016930	24	AFLA_057420|AFLA_125090|AFLA_016930	3	.	0	http://amigo.geneontology.org/cgi-bin/amigo/term_details?term=GO:0009712	no
metal ion homeostasis	GO:0055065	0.06327	1	9	AFLA_032000|AFLA_075860|AFLA_077030|AFLA_126510|AFLA_038590|AFLA_129430|AFLA_068440|AFLA_003980|AFLA_050180	130	AFLA_032000|AFLA_075860|AFLA_038590|AFLA_129430|AFLA_068440	5	AFLA_077030|AFLA_126510|AFLA_003980|AFLA_050180	4	http://amigo.geneontology.org/cgi-bin/amigo/term_details?term=GO:0055065	no
aromatic compound catabolic process	GO:0019439	0.06332	1	16	AFLA_023420|AFLA_024750|AFLA_036090|AFLA_036110|AFLA_108330|AFLA_060700|AFLA_062260|AFLA_125090|AFLA_120890|AFLA_121450|AFLA_093470|AFLA_015920|AFLA_042910|AFLA_102850|AFLA_071180|AFLA_134560	274	AFLA_108330|AFLA_062260|AFLA_125090|AFLA_120890|AFLA_121450|AFLA_093470|AFLA_042910|AFLA_102850|AFLA_134560	9	AFLA_023420|AFLA_024750|AFLA_036090|AFLA_036110|AFLA_060700|AFLA_015920|AFLA_071180	7	http://amigo.geneontology.org/cgi-bin/amigo/term_details?term=GO:0019439	no
secondary metabolic process	GO:0019748	0.06364	1	13	AFLA_024750|AFLA_036110|AFLA_110890|AFLA_058760|AFLA_060700|AFLA_063420|AFLA_125270|AFLA_118100|AFLA_120890|AFLA_064290|AFLA_065570|AFLA_002920|AFLA_138050	211	AFLA_110890|AFLA_120890|AFLA_065570	3	AFLA_024750|AFLA_036110|AFLA_058760|AFLA_060700|AFLA_063420|AFLA_125270|AFLA_118100|AFLA_064290|AFLA_002920|AFLA_138050	10	http://amigo.geneontology.org/cgi-bin/amigo/term_details?term=GO:0019748	no
alcohol metabolic process	GO:0006066	0.06389	1	14	AFLA_030250|AFLA_109820|AFLA_110890|AFLA_063160|AFLA_079230|AFLA_119710|AFLA_122210|AFLA_093790|AFLA_017590|AFLA_044400|AFLA_065130|AFLA_065740|AFLA_003810|AFLA_138560	232	AFLA_030250|AFLA_110890|AFLA_119710|AFLA_017590|AFLA_003810|AFLA_138560	6	AFLA_109820|AFLA_063160|AFLA_079230|AFLA_122210|AFLA_093790|AFLA_044400|AFLA_065130|AFLA_065740	8	http://amigo.geneontology.org/cgi-bin/amigo/term_details?term=GO:0006066	no
melanin metabolic process	GO:0006582	0.06482	1	2	AFLA_036110|AFLA_125270	11	.	0	AFLA_036110|AFLA_125270	2	http://amigo.geneontology.org/cgi-bin/amigo/term_details?term=GO:0006582	no
receptor-mediated endocytosis	GO:0006898	0.06482	1	2	AFLA_078270|AFLA_098330	11	AFLA_078270|AFLA_098330	2	.	0	http://amigo.geneontology.org/cgi-bin/amigo/term_details?term=GO:0006898	no
regulation of cellular component movement	GO:0051270	0.06482	1	2	AFLA_075840|AFLA_038590	11	AFLA_038590	1	AFLA_075840	1	http://amigo.geneontology.org/cgi-bin/amigo/term_details?term=GO:0051270	no
establishment of protein localization to plasma membrane	GO:0090002	0.06987	1	3	AFLA_052640|AFLA_089900|AFLA_038590	25	AFLA_052640|AFLA_038590	2	AFLA_089900	1	http://amigo.geneontology.org/cgi-bin/amigo/term_details?term=GO:0090002	no
sporulation	GO:0043934	0.07094	1	9	AFLA_023600|AFLA_082850|AFLA_083110|AFLA_128330|AFLA_044790|AFLA_066700|AFLA_003220|AFLA_131330|AFLA_137060	133	AFLA_023600|AFLA_083110|AFLA_128330|AFLA_044790|AFLA_003220|AFLA_131330|AFLA_137060	7	AFLA_082850|AFLA_066700	2	http://amigo.geneontology.org/cgi-bin/amigo/term_details?term=GO:0043934	no
phenol-containing compound metabolic process	GO:0018958	0.07186	1	5	AFLA_036110|AFLA_057420|AFLA_125090|AFLA_125270|AFLA_016930	58	AFLA_057420|AFLA_125090|AFLA_016930	3	AFLA_036110|AFLA_125270	2	http://amigo.geneontology.org/cgi-bin/amigo/term_details?term=GO:0018958	no
ribosomal small subunit biogenesis	GO:0042274	0.07186	1	5	AFLA_034340|AFLA_035340|AFLA_044170|AFLA_130100|AFLA_098430	58	.	0	AFLA_034340|AFLA_035340|AFLA_044170|AFLA_130100|AFLA_098430	5	http://amigo.geneontology.org/cgi-bin/amigo/term_details?term=GO:0042274	no
asexual sporulation	GO:0030436	0.07189	1	4	AFLA_082850|AFLA_083110|AFLA_044790|AFLA_131330	41	AFLA_083110|AFLA_044790|AFLA_131330	3	AFLA_082850	1	http://amigo.geneontology.org/cgi-bin/amigo/term_details?term=GO:0030436	no
monosaccharide metabolic process	GO:0005996	0.07267	1	8	AFLA_035030|AFLA_112010|AFLA_125700|AFLA_041410|AFLA_042390|AFLA_044400|AFLA_101470|AFLA_065130	114	AFLA_035030|AFLA_112010|AFLA_042390|AFLA_101470	4	AFLA_125700|AFLA_041410|AFLA_044400|AFLA_065130	4	http://amigo.geneontology.org/cgi-bin/amigo/term_details?term=GO:0005996	no
ribonucleoprotein complex biogenesis	GO:0022613	0.07565	1	16	AFLA_030140|AFLA_034340|AFLA_035340|AFLA_037860|AFLA_111980|AFLA_112090|AFLA_056250|AFLA_079160|AFLA_080140|AFLA_093880|AFLA_041730|AFLA_044170|AFLA_130100|AFLA_098430|AFLA_068000|AFLA_131470	281	.	0	AFLA_030140|AFLA_034340|AFLA_035340|AFLA_037860|AFLA_111980|AFLA_112090|AFLA_056250|AFLA_079160|AFLA_080140|AFLA_093880|AFLA_041730|AFLA_044170|AFLA_130100|AFLA_098430|AFLA_068000|AFLA_131470	16	http://amigo.geneontology.org/cgi-bin/amigo/term_details?term=GO:0022613	no
mesenchyme development	GO:0060485	0.07568	1	1	AFLA_075840	2	.	0	AFLA_075840	1	http://amigo.geneontology.org/cgi-bin/amigo/term_details?term=GO:0060485	no
calcium ion transmembrane import into cytosol	GO:0097553	0.07568	1	1	AFLA_068440	2	AFLA_068440	1	.	0	http://amigo.geneontology.org/cgi-bin/amigo/term_details?term=GO:0097553	no
renal water transport	GO:0003097	0.07568	1	1	AFLA_075840	2	.	0	AFLA_075840	1	http://amigo.geneontology.org/cgi-bin/amigo/term_details?term=GO:0003097	no
renal water homeostasis	GO:0003091	0.07568	1	1	AFLA_075840	2	.	0	AFLA_075840	1	http://amigo.geneontology.org/cgi-bin/amigo/term_details?term=GO:0003091	no
positive regulation of cell morphogenesis involved in differentiation	GO:0010770	0.07568	1	1	AFLA_075840	2	.	0	AFLA_075840	1	http://amigo.geneontology.org/cgi-bin/amigo/term_details?term=GO:0010770	no
regulation of leukocyte proliferation	GO:0070663	0.07568	1	1	AFLA_071180	2	.	0	AFLA_071180	1	http://amigo.geneontology.org/cgi-bin/amigo/term_details?term=GO:0070663	no
stomatal closure	GO:0090332	0.07568	1	1	AFLA_009750	2	.	0	AFLA_009750	1	http://amigo.geneontology.org/cgi-bin/amigo/term_details?term=GO:0090332	no
regulation of stomatal closure	GO:0090333	0.07568	1	1	AFLA_009750	2	.	0	AFLA_009750	1	http://amigo.geneontology.org/cgi-bin/amigo/term_details?term=GO:0090333	no
regulation of insulin secretion involved in cellular response to glucose stimulus	GO:0061178	0.07568	1	1	AFLA_028740	2	AFLA_028740	1	.	0	http://amigo.geneontology.org/cgi-bin/amigo/term_details?term=GO:0061178	no
positive regulation of insulin secretion involved in cellular response to glucose stimulus	GO:0035774	0.07568	1	1	AFLA_028740	2	AFLA_028740	1	.	0	http://amigo.geneontology.org/cgi-bin/amigo/term_details?term=GO:0035774	no
muscle cell migration	GO:0014812	0.07568	1	1	AFLA_075840	2	.	0	AFLA_075840	1	http://amigo.geneontology.org/cgi-bin/amigo/term_details?term=GO:0014812	no
acetate catabolic process	GO:0045733	0.07568	1	1	AFLA_049390	2	.	0	AFLA_049390	1	http://amigo.geneontology.org/cgi-bin/amigo/term_details?term=GO:0045733	no
D-amino acid biosynthetic process	GO:0046437	0.07568	1	1	AFLA_060530	2	.	0	AFLA_060530	1	http://amigo.geneontology.org/cgi-bin/amigo/term_details?term=GO:0046437	no
bone development	GO:0060348	0.07568	1	1	AFLA_075840	2	.	0	AFLA_075840	1	http://amigo.geneontology.org/cgi-bin/amigo/term_details?term=GO:0060348	no
bone morphogenesis	GO:0060349	0.07568	1	1	AFLA_075840	2	.	0	AFLA_075840	1	http://amigo.geneontology.org/cgi-bin/amigo/term_details?term=GO:0060349	no
D-serine biosynthetic process	GO:0070179	0.07568	1	1	AFLA_060530	2	.	0	AFLA_060530	1	http://amigo.geneontology.org/cgi-bin/amigo/term_details?term=GO:0070179	no
T cell apoptotic process	GO:0070231	0.07568	1	1	AFLA_071180	2	.	0	AFLA_071180	1	http://amigo.geneontology.org/cgi-bin/amigo/term_details?term=GO:0070231	no
lymphocyte apoptotic process	GO:0070227	0.07568	1	1	AFLA_071180	2	.	0	AFLA_071180	1	http://amigo.geneontology.org/cgi-bin/amigo/term_details?term=GO:0070227	no
cellular response to iron ion	GO:0071281	0.07568	1	1	AFLA_050180	2	.	0	AFLA_050180	1	http://amigo.geneontology.org/cgi-bin/amigo/term_details?term=GO:0071281	no
vasculogenesis	GO:0001570	0.07568	1	1	AFLA_075840	2	.	0	AFLA_075840	1	http://amigo.geneontology.org/cgi-bin/amigo/term_details?term=GO:0001570	no
histone H3-S10 phosphorylation	GO:0043987	0.07568	1	1	AFLA_047300	2	.	0	AFLA_047300	1	http://amigo.geneontology.org/cgi-bin/amigo/term_details?term=GO:0043987	no
glyoxylate catabolic process	GO:0009436	0.07568	1	1	AFLA_063160	2	.	0	AFLA_063160	1	http://amigo.geneontology.org/cgi-bin/amigo/term_details?term=GO:0009436	no
regulation of mononuclear cell proliferation	GO:0032944	0.07568	1	1	AFLA_071180	2	.	0	AFLA_071180	1	http://amigo.geneontology.org/cgi-bin/amigo/term_details?term=GO:0032944	no
negative regulation of immune system process	GO:0002683	0.07568	1	1	AFLA_071180	2	.	0	AFLA_071180	1	http://amigo.geneontology.org/cgi-bin/amigo/term_details?term=GO:0002683	no
cholesterol biosynthetic process via lathosterol	GO:0033490	0.07568	1	1	AFLA_138560	2	AFLA_138560	1	.	0	http://amigo.geneontology.org/cgi-bin/amigo/term_details?term=GO:0033490	no
regulation of smooth muscle cell migration	GO:0014910	0.07568	1	1	AFLA_075840	2	.	0	AFLA_075840	1	http://amigo.geneontology.org/cgi-bin/amigo/term_details?term=GO:0014910	no
positive regulation of smooth muscle cell migration	GO:0014911	0.07568	1	1	AFLA_075840	2	.	0	AFLA_075840	1	http://amigo.geneontology.org/cgi-bin/amigo/term_details?term=GO:0014911	no
regulation of cell fate commitment	GO:0010453	0.07568	1	1	AFLA_073340	2	AFLA_073340	1	.	0	http://amigo.geneontology.org/cgi-bin/amigo/term_details?term=GO:0010453	no
AV node cell to bundle of His cell signaling	GO:0086027	0.07568	1	1	AFLA_038590	2	AFLA_038590	1	.	0	http://amigo.geneontology.org/cgi-bin/amigo/term_details?term=GO:0086027	no
detection of light stimulus	GO:0009583	0.07568	1	1	AFLA_065850	2	AFLA_065850	1	.	0	http://amigo.geneontology.org/cgi-bin/amigo/term_details?term=GO:0009583	no
detection of abiotic stimulus	GO:0009582	0.07568	1	1	AFLA_065850	2	AFLA_065850	1	.	0	http://amigo.geneontology.org/cgi-bin/amigo/term_details?term=GO:0009582	no
detection of external stimulus	GO:0009581	0.07568	1	1	AFLA_065850	2	AFLA_065850	1	.	0	http://amigo.geneontology.org/cgi-bin/amigo/term_details?term=GO:0009581	no
regulation of cardiac muscle cell membrane potential	GO:0086036	0.07568	1	1	AFLA_038590	2	AFLA_038590	1	.	0	http://amigo.geneontology.org/cgi-bin/amigo/term_details?term=GO:0086036	no
glycine decarboxylation via glycine cleavage system	GO:0019464	0.07568	1	1	AFLA_067450	2	AFLA_067450	1	.	0	http://amigo.geneontology.org/cgi-bin/amigo/term_details?term=GO:0019464	no
epithelial to mesenchymal transition	GO:0001837	0.07568	1	1	AFLA_075840	2	.	0	AFLA_075840	1	http://amigo.geneontology.org/cgi-bin/amigo/term_details?term=GO:0001837	no
T cell proliferation	GO:0042098	0.07568	1	1	AFLA_071180	2	.	0	AFLA_071180	1	http://amigo.geneontology.org/cgi-bin/amigo/term_details?term=GO:0042098	no
mesenchymal cell differentiation	GO:0048762	0.07568	1	1	AFLA_075840	2	.	0	AFLA_075840	1	http://amigo.geneontology.org/cgi-bin/amigo/term_details?term=GO:0048762	no
D-ribose catabolic process	GO:0019303	0.07568	1	1	AFLA_125700	2	.	0	AFLA_125700	1	http://amigo.geneontology.org/cgi-bin/amigo/term_details?term=GO:0019303	no
phototransduction	GO:0007602	0.07568	1	1	AFLA_065850	2	AFLA_065850	1	.	0	http://amigo.geneontology.org/cgi-bin/amigo/term_details?term=GO:0007602	no
fucose metabolic process	GO:0006004	0.07568	1	1	AFLA_041410	2	.	0	AFLA_041410	1	http://amigo.geneontology.org/cgi-bin/amigo/term_details?term=GO:0006004	no
O-glycan processing	GO:0016266	0.07568	1	1	AFLA_110340	2	AFLA_110340	1	.	0	http://amigo.geneontology.org/cgi-bin/amigo/term_details?term=GO:0016266	no
O-glycan processing, core 1	GO:0016267	0.07568	1	1	AFLA_110340	2	AFLA_110340	1	.	0	http://amigo.geneontology.org/cgi-bin/amigo/term_details?term=GO:0016267	no
mesenchymal cell development	GO:0014031	0.07568	1	1	AFLA_075840	2	.	0	AFLA_075840	1	http://amigo.geneontology.org/cgi-bin/amigo/term_details?term=GO:0014031	no
catechol catabolic process, ortho-cleavage	GO:0019615	0.07568	1	1	AFLA_125090	2	AFLA_125090	1	.	0	http://amigo.geneontology.org/cgi-bin/amigo/term_details?term=GO:0019615	no
auxin transport	GO:0060918	0.07568	1	1	AFLA_009750	2	.	0	AFLA_009750	1	http://amigo.geneontology.org/cgi-bin/amigo/term_details?term=GO:0060918	no
extracellular matrix assembly	GO:0085029	0.07568	1	1	AFLA_075840	2	.	0	AFLA_075840	1	http://amigo.geneontology.org/cgi-bin/amigo/term_details?term=GO:0085029	no
cholesterol biosynthetic process via desmosterol	GO:0033489	0.07568	1	1	AFLA_138560	2	AFLA_138560	1	.	0	http://amigo.geneontology.org/cgi-bin/amigo/term_details?term=GO:0033489	no
smooth muscle cell migration	GO:0014909	0.07568	1	1	AFLA_075840	2	.	0	AFLA_075840	1	http://amigo.geneontology.org/cgi-bin/amigo/term_details?term=GO:0014909	no
regulation of AV node cell action potential	GO:0098904	0.07568	1	1	AFLA_038590	2	AFLA_038590	1	.	0	http://amigo.geneontology.org/cgi-bin/amigo/term_details?term=GO:0098904	no
re-entry into mitotic cell cycle	GO:0000320	0.07568	1	1	AFLA_047300	2	.	0	AFLA_047300	1	http://amigo.geneontology.org/cgi-bin/amigo/term_details?term=GO:0000320	no
hexitol biosynthetic process	GO:0019406	0.07568	1	1	AFLA_122210	2	.	0	AFLA_122210	1	http://amigo.geneontology.org/cgi-bin/amigo/term_details?term=GO:0019406	no
leukocyte apoptotic process	GO:0071887	0.07568	1	1	AFLA_071180	2	.	0	AFLA_071180	1	http://amigo.geneontology.org/cgi-bin/amigo/term_details?term=GO:0071887	no
allantoin assimilation pathway	GO:0009442	0.07568	1	1	AFLA_063160	2	.	0	AFLA_063160	1	http://amigo.geneontology.org/cgi-bin/amigo/term_details?term=GO:0009442	no
inorganic ion import into cell	GO:0099587	0.07568	1	1	AFLA_068440	2	AFLA_068440	1	.	0	http://amigo.geneontology.org/cgi-bin/amigo/term_details?term=GO:0099587	no
glycolate metabolic process	GO:0009441	0.07568	1	1	AFLA_063160	2	.	0	AFLA_063160	1	http://amigo.geneontology.org/cgi-bin/amigo/term_details?term=GO:0009441	no
starch metabolic process	GO:0005982	0.07568	1	1	AFLA_023490	2	AFLA_023490	1	.	0	http://amigo.geneontology.org/cgi-bin/amigo/term_details?term=GO:0005982	no
multicellular organismal water homeostasis	GO:0050891	0.07568	1	1	AFLA_075840	2	.	0	AFLA_075840	1	http://amigo.geneontology.org/cgi-bin/amigo/term_details?term=GO:0050891	no
intestinal epithelial cell development	GO:0060576	0.07568	1	1	AFLA_110340	2	AFLA_110340	1	.	0	http://amigo.geneontology.org/cgi-bin/amigo/term_details?term=GO:0060576	no
intestinal epithelial cell differentiation	GO:0060575	0.07568	1	1	AFLA_110340	2	AFLA_110340	1	.	0	http://amigo.geneontology.org/cgi-bin/amigo/term_details?term=GO:0060575	no
positive regulation of calcium-mediated signaling involved in cellular response to salt stress	GO:1901196	0.07568	1	1	AFLA_068440	2	AFLA_068440	1	.	0	http://amigo.geneontology.org/cgi-bin/amigo/term_details?term=GO:1901196	no
positive regulation of calcium-mediated signaling	GO:0050850	0.07568	1	1	AFLA_068440	2	AFLA_068440	1	.	0	http://amigo.geneontology.org/cgi-bin/amigo/term_details?term=GO:0050850	no
positive regulation of substrate adhesion-dependent cell spreading	GO:1900026	0.07568	1	1	AFLA_075840	2	.	0	AFLA_075840	1	http://amigo.geneontology.org/cgi-bin/amigo/term_details?term=GO:1900026	no
ferrous iron transport	GO:0015684	0.07568	1	1	AFLA_050180	2	.	0	AFLA_050180	1	http://amigo.geneontology.org/cgi-bin/amigo/term_details?term=GO:0015684	no
D-ribose metabolic process	GO:0006014	0.07568	1	1	AFLA_125700	2	.	0	AFLA_125700	1	http://amigo.geneontology.org/cgi-bin/amigo/term_details?term=GO:0006014	no
AV node cell action potential	GO:0086016	0.07568	1	1	AFLA_038590	2	AFLA_038590	1	.	0	http://amigo.geneontology.org/cgi-bin/amigo/term_details?term=GO:0086016	no
renal absorption	GO:0070293	0.07568	1	1	AFLA_075840	2	.	0	AFLA_075840	1	http://amigo.geneontology.org/cgi-bin/amigo/term_details?term=GO:0070293	no
renal water absorption	GO:0070295	0.07568	1	1	AFLA_075840	2	.	0	AFLA_075840	1	http://amigo.geneontology.org/cgi-bin/amigo/term_details?term=GO:0070295	no
AV node cell to bundle of His cell communication	GO:0086067	0.07568	1	1	AFLA_038590	2	AFLA_038590	1	.	0	http://amigo.geneontology.org/cgi-bin/amigo/term_details?term=GO:0086067	no
regulation of mating type switching	GO:0031494	0.07568	1	1	AFLA_073340	2	AFLA_073340	1	.	0	http://amigo.geneontology.org/cgi-bin/amigo/term_details?term=GO:0031494	no
calcium ion import into cytosol	GO:1902656	0.07568	1	1	AFLA_068440	2	AFLA_068440	1	.	0	http://amigo.geneontology.org/cgi-bin/amigo/term_details?term=GO:1902656	no
regulation of lymphocyte proliferation	GO:0050670	0.07568	1	1	AFLA_071180	2	.	0	AFLA_071180	1	http://amigo.geneontology.org/cgi-bin/amigo/term_details?term=GO:0050670	no
inorganic cation import into cell	GO:0098659	0.07568	1	1	AFLA_068440	2	AFLA_068440	1	.	0	http://amigo.geneontology.org/cgi-bin/amigo/term_details?term=GO:0098659	no
sorbitol biosynthetic process	GO:0006061	0.07568	1	1	AFLA_122210	2	.	0	AFLA_122210	1	http://amigo.geneontology.org/cgi-bin/amigo/term_details?term=GO:0006061	no
sorbitol metabolic process	GO:0006060	0.07568	1	1	AFLA_122210	2	.	0	AFLA_122210	1	http://amigo.geneontology.org/cgi-bin/amigo/term_details?term=GO:0006060	no
Golgi vesicle budding	GO:0048194	0.07568	1	1	AFLA_046150	2	AFLA_046150	1	.	0	http://amigo.geneontology.org/cgi-bin/amigo/term_details?term=GO:0048194	no
regulation of T cell proliferation	GO:0042129	0.07568	1	1	AFLA_071180	2	.	0	AFLA_071180	1	http://amigo.geneontology.org/cgi-bin/amigo/term_details?term=GO:0042129	no
positive regulation of response to wounding	GO:1903036	0.07568	1	1	AFLA_071180	2	.	0	AFLA_071180	1	http://amigo.geneontology.org/cgi-bin/amigo/term_details?term=GO:1903036	no
ribosomal small subunit assembly	GO:0000028	0.07586	1	2	AFLA_034340|AFLA_044170	12	.	0	AFLA_034340|AFLA_044170	2	http://amigo.geneontology.org/cgi-bin/amigo/term_details?term=GO:0000028	no
ascospore-type prospore assembly	GO:0031321	0.07586	1	2	AFLA_003220|AFLA_137060	12	AFLA_003220|AFLA_137060	2	.	0	http://amigo.geneontology.org/cgi-bin/amigo/term_details?term=GO:0031321	no
calcium ion transport	GO:0006816	0.07682	1	3	AFLA_038590|AFLA_129430|AFLA_068440	26	AFLA_038590|AFLA_129430|AFLA_068440	3	.	0	http://amigo.geneontology.org/cgi-bin/amigo/term_details?term=GO:0006816	no
organonitrogen compound metabolic process	GO:1901564	0.0787	1	46	AFLA_023420|AFLA_024750|AFLA_031380|AFLA_035970|AFLA_036090|AFLA_036110|AFLA_036440|AFLA_110930|AFLA_112010|AFLA_057420|AFLA_060530|AFLA_060680|AFLA_060700|AFLA_063160|AFLA_063420|AFLA_054470|AFLA_073450|AFLA_075840|AFLA_079230|AFLA_084230|AFLA_123350|AFLA_116430|AFLA_092640|AFLA_093230|AFLA_014490|AFLA_015920|AFLA_016930|AFLA_021700|AFLA_041420|AFLA_041430|AFLA_047080|AFLA_099250|AFLA_099270|AFL…	974	AFLA_031380|AFLA_035970|AFLA_112010|AFLA_057420|AFLA_054470|AFLA_116430|AFLA_092640|AFLA_093230|AFLA_014490|AFLA_016930|AFLA_047080|AFLA_102850|AFLA_067450|AFLA_001850|AFLA_003810|AFLA_134090|AFLA_134560|AFLA_137200|AFLA_137760	19	AFLA_023420|AFLA_024750|AFLA_036090|AFLA_036110|AFLA_036440|AFLA_110930|AFLA_060530|AFLA_060680|AFLA_060700|AFLA_063160|AFLA_063420|AFLA_073450|AFLA_075840|AFLA_079230|AFLA_084230|AFLA_123350|AFLA_015920|AFLA_021700|AFLA_041420|AFLA_041430|AFLA_099250|AFLA_099270|AFLA_099280|AFLA_066210|AFLA_071180|AFLA_005130|AFLA_138430	27	http://amigo.geneontology.org/cgi-bin/amigo/term_details?term=GO:1901564	no
carboxylic acid biosynthetic process	GO:0046394	0.0791	1	21	AFLA_024750|AFLA_030430|AFLA_036440|AFLA_106350|AFLA_107840|AFLA_108930|AFLA_110930|AFLA_060530|AFLA_060700|AFLA_079230|AFLA_084230|AFLA_116430|AFLA_122560|AFLA_021700|AFLA_041430|AFLA_044400|AFLA_044460|AFLA_066210|AFLA_066620|AFLA_071180|AFLA_134090	393	AFLA_106350|AFLA_108930|AFLA_116430|AFLA_122560|AFLA_066620|AFLA_134090	6	AFLA_024750|AFLA_030430|AFLA_036440|AFLA_107840|AFLA_110930|AFLA_060530|AFLA_060700|AFLA_079230|AFLA_084230|AFLA_021700|AFLA_041430|AFLA_044400|AFLA_044460|AFLA_066210|AFLA_071180	15	http://amigo.geneontology.org/cgi-bin/amigo/term_details?term=GO:0046394	no
organic acid biosynthetic process	GO:0016053	0.0791	1	21	AFLA_024750|AFLA_030430|AFLA_036440|AFLA_106350|AFLA_107840|AFLA_108930|AFLA_110930|AFLA_060530|AFLA_060700|AFLA_079230|AFLA_084230|AFLA_116430|AFLA_122560|AFLA_021700|AFLA_041430|AFLA_044400|AFLA_044460|AFLA_066210|AFLA_066620|AFLA_071180|AFLA_134090	393	AFLA_106350|AFLA_108930|AFLA_116430|AFLA_122560|AFLA_066620|AFLA_134090	6	AFLA_024750|AFLA_030430|AFLA_036440|AFLA_107840|AFLA_110930|AFLA_060530|AFLA_060700|AFLA_079230|AFLA_084230|AFLA_021700|AFLA_041430|AFLA_044400|AFLA_044460|AFLA_066210|AFLA_071180	15	http://amigo.geneontology.org/cgi-bin/amigo/term_details?term=GO:0016053	no
amine metabolic process	GO:0009308	0.08178	1	8	AFLA_024750|AFLA_073450|AFLA_079230|AFLA_014490|AFLA_015920|AFLA_071180|AFLA_003810|AFLA_138430	117	AFLA_014490|AFLA_003810	2	AFLA_024750|AFLA_073450|AFLA_079230|AFLA_015920|AFLA_071180|AFLA_138430	6	http://amigo.geneontology.org/cgi-bin/amigo/term_details?term=GO:0009308	no
carbohydrate derivative catabolic process	GO:1901136	0.08355	1	6	AFLA_031380|AFLA_054470|AFLA_012050|AFLA_012080|AFLA_102850|AFLA_134560	79	AFLA_031380|AFLA_054470|AFLA_102850|AFLA_134560	4	AFLA_012050|AFLA_012080	2	http://amigo.geneontology.org/cgi-bin/amigo/term_details?term=GO:1901136	no
organophosphate ester transport	GO:0015748	0.08406	1	3	AFLA_075860|AFLA_045770|AFLA_046150	27	AFLA_075860|AFLA_045770|AFLA_046150	3	.	0	http://amigo.geneontology.org/cgi-bin/amigo/term_details?term=GO:0015748	no
cardiovascular system development	GO:0072358	0.08406	1	3	AFLA_028740|AFLA_110340|AFLA_075840	27	AFLA_028740|AFLA_110340	2	AFLA_075840	1	http://amigo.geneontology.org/cgi-bin/amigo/term_details?term=GO:0072358	no
circulatory system development	GO:0072359	0.08406	1	3	AFLA_028740|AFLA_110340|AFLA_075840	27	AFLA_028740|AFLA_110340	2	AFLA_075840	1	http://amigo.geneontology.org/cgi-bin/amigo/term_details?term=GO:0072359	no
L-serine metabolic process	GO:0006563	0.08743	1	2	AFLA_060530|AFLA_047080	13	AFLA_047080	1	AFLA_060530	1	http://amigo.geneontology.org/cgi-bin/amigo/term_details?term=GO:0006563	no
response to pheromone involved in conjugation with cellular fusion	GO:0000749	0.08743	1	2	AFLA_003220|AFLA_050300	13	AFLA_003220|AFLA_050300	2	.	0	http://amigo.geneontology.org/cgi-bin/amigo/term_details?term=GO:0000749	no
aflatoxin biosynthetic process	GO:0045122	0.08828	1	4	AFLA_058760|AFLA_065570|AFLA_002920|AFLA_138050	44	AFLA_065570	1	AFLA_058760|AFLA_002920|AFLA_138050	3	http://amigo.geneontology.org/cgi-bin/amigo/term_details?term=GO:0045122	no
serine family amino acid metabolic process	GO:0009069	0.08828	1	4	AFLA_060530|AFLA_021700|AFLA_047080|AFLA_067450	44	AFLA_047080|AFLA_067450	2	AFLA_060530|AFLA_021700	2	http://amigo.geneontology.org/cgi-bin/amigo/term_details?term=GO:0009069	no
aflatoxin metabolic process	GO:0046222	0.08828	1	4	AFLA_058760|AFLA_065570|AFLA_002920|AFLA_138050	44	AFLA_065570	1	AFLA_058760|AFLA_002920|AFLA_138050	3	http://amigo.geneontology.org/cgi-bin/amigo/term_details?term=GO:0046222	no
sporulation resulting in formation of a cellular spore	GO:0030435	0.09154	1	8	AFLA_023600|AFLA_082850|AFLA_083110|AFLA_128330|AFLA_044790|AFLA_066700|AFLA_003220|AFLA_137060	120	AFLA_023600|AFLA_083110|AFLA_128330|AFLA_044790|AFLA_003220|AFLA_137060	6	AFLA_082850|AFLA_066700	2	http://amigo.geneontology.org/cgi-bin/amigo/term_details?term=GO:0030435	no
protein localization to plasma membrane	GO:0072659	0.09159	1	3	AFLA_052640|AFLA_089900|AFLA_038590	28	AFLA_052640|AFLA_038590	2	AFLA_089900	1	http://amigo.geneontology.org/cgi-bin/amigo/term_details?term=GO:0072659	no
system process	GO:0003008	0.09159	1	3	AFLA_075840|AFLA_093230|AFLA_038590	28	AFLA_093230|AFLA_038590	2	AFLA_075840	1	http://amigo.geneontology.org/cgi-bin/amigo/term_details?term=GO:0003008	no
fatty acid biosynthetic process	GO:0006633	0.09169	1	6	AFLA_030430|AFLA_106350|AFLA_107840|AFLA_108930|AFLA_044460|AFLA_066620	81	AFLA_106350|AFLA_108930|AFLA_066620	3	AFLA_030430|AFLA_107840|AFLA_044460	3	http://amigo.geneontology.org/cgi-bin/amigo/term_details?term=GO:0006633	no
carbohydrate metabolic process	GO:0005975	0.09305	1	31	AFLA_023490|AFLA_031380|AFLA_035030|AFLA_110340|AFLA_112010|AFLA_063040|AFLA_063680|AFLA_054470|AFLA_011230|AFLA_012050|AFLA_012080|AFLA_074520|AFLA_075840|AFLA_078120|AFLA_125700|AFLA_081980|AFLA_087870|AFLA_116430|AFLA_121370|AFLA_122210|AFLA_122400|AFLA_093790|AFLA_094850|AFLA_041410|AFLA_042390|AFLA_044400|AFLA_101470|AFLA_065130|AFLA_070170|AFLA_049390|AFLA_132650	631	AFLA_023490|AFLA_031380|AFLA_035030|AFLA_110340|AFLA_112010|AFLA_054470|AFLA_011230|AFLA_078120|AFLA_087870|AFLA_116430|AFLA_121370|AFLA_094850|AFLA_042390|AFLA_101470|AFLA_132650	15	AFLA_063040|AFLA_063680|AFLA_012050|AFLA_012080|AFLA_074520|AFLA_075840|AFLA_125700|AFLA_081980|AFLA_122210|AFLA_122400|AFLA_093790|AFLA_041410|AFLA_044400|AFLA_065130|AFLA_070170|AFLA_049390	16	http://amigo.geneontology.org/cgi-bin/amigo/term_details?term=GO:0005975	no
ribosome biogenesis	GO:0042254	0.09415	1	13	AFLA_030140|AFLA_034340|AFLA_035340|AFLA_037860|AFLA_112090|AFLA_056250|AFLA_079160|AFLA_080140|AFLA_093880|AFLA_044170|AFLA_130100|AFLA_098430|AFLA_068000	225	.	0	AFLA_030140|AFLA_034340|AFLA_035340|AFLA_037860|AFLA_112090|AFLA_056250|AFLA_079160|AFLA_080140|AFLA_093880|AFLA_044170|AFLA_130100|AFLA_098430|AFLA_068000	13	http://amigo.geneontology.org/cgi-bin/amigo/term_details?term=GO:0042254	no
cellular cation homeostasis	GO:0030003	0.09494	1	8	AFLA_032000|AFLA_077030|AFLA_126510|AFLA_038590|AFLA_129430|AFLA_068440|AFLA_003980|AFLA_050180	121	AFLA_032000|AFLA_038590|AFLA_129430|AFLA_068440	4	AFLA_077030|AFLA_126510|AFLA_003980|AFLA_050180	4	http://amigo.geneontology.org/cgi-bin/amigo/term_details?term=GO:0030003	no
chemical homeostasis	GO:0048878	0.0951	1	12	AFLA_028740|AFLA_032000|AFLA_075840|AFLA_075860|AFLA_077030|AFLA_126510|AFLA_038590|AFLA_129430|AFLA_099270|AFLA_068440|AFLA_003980|AFLA_050180	204	AFLA_028740|AFLA_032000|AFLA_075860|AFLA_038590|AFLA_129430|AFLA_068440	6	AFLA_075840|AFLA_077030|AFLA_126510|AFLA_099270|AFLA_003980|AFLA_050180	6	http://amigo.geneontology.org/cgi-bin/amigo/term_details?term=GO:0048878	no
asexual reproduction	GO:0019954	0.09592	1	6	AFLA_011230|AFLA_082850|AFLA_083110|AFLA_019060|AFLA_044790|AFLA_131330	82	AFLA_011230|AFLA_083110|AFLA_044790|AFLA_131330	4	AFLA_082850|AFLA_019060	2	http://amigo.geneontology.org/cgi-bin/amigo/term_details?term=GO:0019954	no
lipid catabolic process	GO:0016042	0.09726	1	9	AFLA_029780|AFLA_110960|AFLA_124470|AFLA_073320|AFLA_018500|AFLA_099270|AFLA_003220|AFLA_003810|AFLA_049390	142	AFLA_029780|AFLA_110960|AFLA_073320|AFLA_018500|AFLA_003220|AFLA_003810	6	AFLA_124470|AFLA_099270|AFLA_049390	3	http://amigo.geneontology.org/cgi-bin/amigo/term_details?term=GO:0016042	no
blood vessel morphogenesis	GO:0048514	0.0995	1	2	AFLA_110340|AFLA_075840	14	AFLA_110340	1	AFLA_075840	1	http://amigo.geneontology.org/cgi-bin/amigo/term_details?term=GO:0048514	no
heart development	GO:0007507	0.0995	1	2	AFLA_028740|AFLA_075840	14	AFLA_028740	1	AFLA_075840	1	http://amigo.geneontology.org/cgi-bin/amigo/term_details?term=GO:0007507	no
benzene-containing compound metabolic process	GO:0042537	0.10012	1	4	AFLA_024750|AFLA_060700|AFLA_062260|AFLA_071180	46	AFLA_062260	1	AFLA_024750|AFLA_060700|AFLA_071180	3	http://amigo.geneontology.org/cgi-bin/amigo/term_details?term=GO:0042537	no
anatomical structure formation involved in morphogenesis	GO:0048646	0.10436	1	10	AFLA_023600|AFLA_110340|AFLA_082850|AFLA_083110|AFLA_128330|AFLA_044790|AFLA_066700|AFLA_003220|AFLA_131330|AFLA_137060	165	AFLA_023600|AFLA_110340|AFLA_083110|AFLA_128330|AFLA_044790|AFLA_003220|AFLA_131330|AFLA_137060	8	AFLA_082850|AFLA_066700	2	http://amigo.geneontology.org/cgi-bin/amigo/term_details?term=GO:0048646	no
cellular catabolic process	GO:0044248	0.10569	1	38	AFLA_023420|AFLA_024750|AFLA_028740|AFLA_030430|AFLA_035970|AFLA_036090|AFLA_036110|AFLA_036440|AFLA_107840|AFLA_108330|AFLA_108930|AFLA_110960|AFLA_056250|AFLA_060700|AFLA_062260|AFLA_063160|AFLA_012050|AFLA_012080|AFLA_073320|AFLA_125090|AFLA_081980|AFLA_120890|AFLA_121450|AFLA_122560|AFLA_122570|AFLA_093470|AFLA_015920|AFLA_042910|AFLA_099250|AFLA_099270|AFLA_099280|AFLA_102850|AFLA_067450|AFL…	805	AFLA_028740|AFLA_035970|AFLA_108330|AFLA_108930|AFLA_110960|AFLA_062260|AFLA_073320|AFLA_125090|AFLA_120890|AFLA_121450|AFLA_122560|AFLA_122570|AFLA_093470|AFLA_042910|AFLA_102850|AFLA_067450|AFLA_003810|AFLA_134560	18	AFLA_023420|AFLA_024750|AFLA_030430|AFLA_036090|AFLA_036110|AFLA_036440|AFLA_107840|AFLA_056250|AFLA_060700|AFLA_063160|AFLA_012050|AFLA_012080|AFLA_081980|AFLA_015920|AFLA_099250|AFLA_099270|AFLA_099280|AFLA_071180|AFLA_049390|AFLA_005130	20	http://amigo.geneontology.org/cgi-bin/amigo/term_details?term=GO:0044248	no
polyol metabolic process	GO:0019751	0.1063	1	4	AFLA_110890|AFLA_122210|AFLA_093790|AFLA_044400	47	AFLA_110890	1	AFLA_122210|AFLA_093790|AFLA_044400	3	http://amigo.geneontology.org/cgi-bin/amigo/term_details?term=GO:0019751	no
cellular chemical homeostasis	GO:0055082	0.10715	1	9	AFLA_028740|AFLA_032000|AFLA_077030|AFLA_126510|AFLA_038590|AFLA_129430|AFLA_068440|AFLA_003980|AFLA_050180	145	AFLA_028740|AFLA_032000|AFLA_038590|AFLA_129430|AFLA_068440	5	AFLA_077030|AFLA_126510|AFLA_003980|AFLA_050180	4	http://amigo.geneontology.org/cgi-bin/amigo/term_details?term=GO:0055082	no
plasma membrane organization	GO:0007009	0.10743	1	3	AFLA_052640|AFLA_089900|AFLA_038590	30	AFLA_052640|AFLA_038590	2	AFLA_089900	1	http://amigo.geneontology.org/cgi-bin/amigo/term_details?term=GO:0007009	no
cellular amine metabolic process	GO:0044106	0.11019	1	7	AFLA_024750|AFLA_079230|AFLA_014490|AFLA_015920|AFLA_071180|AFLA_003810|AFLA_138430	105	AFLA_014490|AFLA_003810	2	AFLA_024750|AFLA_079230|AFLA_015920|AFLA_071180|AFLA_138430	5	http://amigo.geneontology.org/cgi-bin/amigo/term_details?term=GO:0044106	no
regulation of substrate adhesion-dependent cell spreading	GO:1900024	0.11136	1	1	AFLA_075840	3	.	0	AFLA_075840	1	http://amigo.geneontology.org/cgi-bin/amigo/term_details?term=GO:1900024	no
positive regulation of potassium ion transport	GO:0043268	0.11136	1	1	AFLA_038590	3	AFLA_038590	1	.	0	http://amigo.geneontology.org/cgi-bin/amigo/term_details?term=GO:0043268	no
UDP-glucuronate metabolic process	GO:0046398	0.11136	1	1	AFLA_116430	3	AFLA_116430	1	.	0	http://amigo.geneontology.org/cgi-bin/amigo/term_details?term=GO:0046398	no
positive regulation of insulin secretion	GO:0032024	0.11136	1	1	AFLA_028740	3	AFLA_028740	1	.	0	http://amigo.geneontology.org/cgi-bin/amigo/term_details?term=GO:0032024	no
leukocyte proliferation	GO:0070661	0.11136	1	1	AFLA_071180	3	.	0	AFLA_071180	1	http://amigo.geneontology.org/cgi-bin/amigo/term_details?term=GO:0070661	no
response to lipopolysaccharide	GO:0032496	0.11136	1	1	AFLA_071180	3	.	0	AFLA_071180	1	http://amigo.geneontology.org/cgi-bin/amigo/term_details?term=GO:0032496	no
regulation of heart rate	GO:0002027	0.11136	1	1	AFLA_038590	3	AFLA_038590	1	.	0	http://amigo.geneontology.org/cgi-bin/amigo/term_details?term=GO:0002027	no
2,4-dichlorophenoxyacetic acid catabolic process	GO:0046300	0.11136	1	1	AFLA_062260	3	AFLA_062260	1	.	0	http://amigo.geneontology.org/cgi-bin/amigo/term_details?term=GO:0046300	no
lymphocyte proliferation	GO:0046651	0.11136	1	1	AFLA_071180	3	.	0	AFLA_071180	1	http://amigo.geneontology.org/cgi-bin/amigo/term_details?term=GO:0046651	no
protein localization to T-tubule	GO:0036371	0.11136	1	1	AFLA_038590	3	AFLA_038590	1	.	0	http://amigo.geneontology.org/cgi-bin/amigo/term_details?term=GO:0036371	no
UDP-glucuronate biosynthetic process	GO:0006065	0.11136	1	1	AFLA_116430	3	AFLA_116430	1	.	0	http://amigo.geneontology.org/cgi-bin/amigo/term_details?term=GO:0006065	no
glycine catabolic process	GO:0006546	0.11136	1	1	AFLA_067450	3	AFLA_067450	1	.	0	http://amigo.geneontology.org/cgi-bin/amigo/term_details?term=GO:0006546	no
intracellular sequestering of iron ion	GO:0006880	0.11136	1	1	AFLA_050180	3	.	0	AFLA_050180	1	http://amigo.geneontology.org/cgi-bin/amigo/term_details?term=GO:0006880	no
adenosine catabolic process	GO:0006154	0.11136	1	1	AFLA_134560	3	AFLA_134560	1	.	0	http://amigo.geneontology.org/cgi-bin/amigo/term_details?term=GO:0006154	no
insulin secretion involved in cellular response to glucose stimulus	GO:0035773	0.11136	1	1	AFLA_028740	3	AFLA_028740	1	.	0	http://amigo.geneontology.org/cgi-bin/amigo/term_details?term=GO:0035773	no
positive regulation of calcium ion transmembrane transporter activity	GO:1901021	0.11136	1	1	AFLA_038590	3	AFLA_038590	1	.	0	http://amigo.geneontology.org/cgi-bin/amigo/term_details?term=GO:1901021	no
response to nickel cation	GO:0010045	0.11136	1	1	AFLA_018740	3	.	0	AFLA_018740	1	http://amigo.geneontology.org/cgi-bin/amigo/term_details?term=GO:0010045	no
regulation of heart contraction	GO:0008016	0.11136	1	1	AFLA_038590	3	AFLA_038590	1	.	0	http://amigo.geneontology.org/cgi-bin/amigo/term_details?term=GO:0008016	no
regulation of calcium ion transmembrane transporter activity	GO:1901019	0.11136	1	1	AFLA_038590	3	AFLA_038590	1	.	0	http://amigo.geneontology.org/cgi-bin/amigo/term_details?term=GO:1901019	no
positive regulation of potassium ion transmembrane transporter activity	GO:1901018	0.11136	1	1	AFLA_038590	3	AFLA_038590	1	.	0	http://amigo.geneontology.org/cgi-bin/amigo/term_details?term=GO:1901018	no
glycine biosynthetic process	GO:0006545	0.11136	1	1	AFLA_021700	3	.	0	AFLA_021700	1	http://amigo.geneontology.org/cgi-bin/amigo/term_details?term=GO:0006545	no
release of sequestered calcium ion into cytosol by sarcoplasmic reticulum	GO:0014808	0.11136	1	1	AFLA_038590	3	AFLA_038590	1	.	0	http://amigo.geneontology.org/cgi-bin/amigo/term_details?term=GO:0014808	no
columnar/cuboidal epithelial cell development	GO:0002066	0.11136	1	1	AFLA_110340	3	AFLA_110340	1	.	0	http://amigo.geneontology.org/cgi-bin/amigo/term_details?term=GO:0002066	no
positive regulation of peptide secretion	GO:0002793	0.11136	1	1	AFLA_028740	3	AFLA_028740	1	.	0	http://amigo.geneontology.org/cgi-bin/amigo/term_details?term=GO:0002793	no
regulation of peptide secretion	GO:0002791	0.11136	1	1	AFLA_028740	3	AFLA_028740	1	.	0	http://amigo.geneontology.org/cgi-bin/amigo/term_details?term=GO:0002791	no
sequestering of iron ion	GO:0097577	0.11136	1	1	AFLA_050180	3	.	0	AFLA_050180	1	http://amigo.geneontology.org/cgi-bin/amigo/term_details?term=GO:0097577	no
response to red or far red light	GO:0009639	0.11136	1	1	AFLA_065850	3	AFLA_065850	1	.	0	http://amigo.geneontology.org/cgi-bin/amigo/term_details?term=GO:0009639	no
response to activity	GO:0014823	0.11136	1	1	AFLA_028740	3	AFLA_028740	1	.	0	http://amigo.geneontology.org/cgi-bin/amigo/term_details?term=GO:0014823	no
cinnamic acid biosynthetic process	GO:0009800	0.11136	1	1	AFLA_060700	3	.	0	AFLA_060700	1	http://amigo.geneontology.org/cgi-bin/amigo/term_details?term=GO:0009800	no
negative regulation of Rho protein signal transduction	GO:0035024	0.11136	1	1	AFLA_102850	3	AFLA_102850	1	.	0	http://amigo.geneontology.org/cgi-bin/amigo/term_details?term=GO:0035024	no
atrial cardiac muscle cell action potential	GO:0086014	0.11136	1	1	AFLA_038590	3	AFLA_038590	1	.	0	http://amigo.geneontology.org/cgi-bin/amigo/term_details?term=GO:0086014	no
SA node cell to atrial cardiac muscle cell signalling	GO:0086018	0.11136	1	1	AFLA_038590	3	AFLA_038590	1	.	0	http://amigo.geneontology.org/cgi-bin/amigo/term_details?term=GO:0086018	no
regulation of actin filament-based movement	GO:1903115	0.11136	1	1	AFLA_038590	3	AFLA_038590	1	.	0	http://amigo.geneontology.org/cgi-bin/amigo/term_details?term=GO:1903115	no
protein localization to M-band	GO:0036309	0.11136	1	1	AFLA_038590	3	AFLA_038590	1	.	0	http://amigo.geneontology.org/cgi-bin/amigo/term_details?term=GO:0036309	no
alanine metabolic process	GO:0006522	0.11136	1	1	AFLA_036440	3	.	0	AFLA_036440	1	http://amigo.geneontology.org/cgi-bin/amigo/term_details?term=GO:0006522	no
D-serine metabolic process	GO:0070178	0.11136	1	1	AFLA_060530	3	.	0	AFLA_060530	1	http://amigo.geneontology.org/cgi-bin/amigo/term_details?term=GO:0070178	no
regulation of calcium ion transmembrane transport	GO:1903169	0.11136	1	1	AFLA_038590	3	AFLA_038590	1	.	0	http://amigo.geneontology.org/cgi-bin/amigo/term_details?term=GO:1903169	no
heart process	GO:0003015	0.11136	1	1	AFLA_038590	3	AFLA_038590	1	.	0	http://amigo.geneontology.org/cgi-bin/amigo/term_details?term=GO:0003015	no
renal system process	GO:0003014	0.11136	1	1	AFLA_075840	3	.	0	AFLA_075840	1	http://amigo.geneontology.org/cgi-bin/amigo/term_details?term=GO:0003014	no
pyruvate family amino acid metabolic process	GO:0009078	0.11136	1	1	AFLA_036440	3	.	0	AFLA_036440	1	http://amigo.geneontology.org/cgi-bin/amigo/term_details?term=GO:0009078	no
serine family amino acid catabolic process	GO:0009071	0.11136	1	1	AFLA_067450	3	AFLA_067450	1	.	0	http://amigo.geneontology.org/cgi-bin/amigo/term_details?term=GO:0009071	no
regulation of heart rate by cardiac conduction	GO:0086091	0.11136	1	1	AFLA_038590	3	AFLA_038590	1	.	0	http://amigo.geneontology.org/cgi-bin/amigo/term_details?term=GO:0086091	no
regulation of insulin secretion	GO:0050796	0.11136	1	1	AFLA_028740	3	AFLA_028740	1	.	0	http://amigo.geneontology.org/cgi-bin/amigo/term_details?term=GO:0050796	no
skeletal system morphogenesis	GO:0048705	0.11136	1	1	AFLA_075840	3	.	0	AFLA_075840	1	http://amigo.geneontology.org/cgi-bin/amigo/term_details?term=GO:0048705	no
adipose tissue development	GO:0060612	0.11136	1	1	AFLA_028740	3	AFLA_028740	1	.	0	http://amigo.geneontology.org/cgi-bin/amigo/term_details?term=GO:0060612	no
detection of stimulus	GO:0051606	0.11136	1	1	AFLA_065850	3	AFLA_065850	1	.	0	http://amigo.geneontology.org/cgi-bin/amigo/term_details?term=GO:0051606	no
positive regulation of peptide hormone secretion	GO:0090277	0.11136	1	1	AFLA_028740	3	AFLA_028740	1	.	0	http://amigo.geneontology.org/cgi-bin/amigo/term_details?term=GO:0090277	no
response to molecule of bacterial origin	GO:0002237	0.11136	1	1	AFLA_071180	3	.	0	AFLA_071180	1	http://amigo.geneontology.org/cgi-bin/amigo/term_details?term=GO:0002237	no
mononuclear cell proliferation	GO:0032943	0.11136	1	1	AFLA_071180	3	.	0	AFLA_071180	1	http://amigo.geneontology.org/cgi-bin/amigo/term_details?term=GO:0032943	no
substrate adhesion-dependent cell spreading	GO:0034446	0.11136	1	1	AFLA_075840	3	.	0	AFLA_075840	1	http://amigo.geneontology.org/cgi-bin/amigo/term_details?term=GO:0034446	no
cardiac conduction	GO:0061337	0.11136	1	1	AFLA_038590	3	AFLA_038590	1	.	0	http://amigo.geneontology.org/cgi-bin/amigo/term_details?term=GO:0061337	no
striated muscle contraction	GO:0006941	0.11136	1	1	AFLA_038590	3	AFLA_038590	1	.	0	http://amigo.geneontology.org/cgi-bin/amigo/term_details?term=GO:0006941	no
2,4-dichlorophenoxyacetic acid metabolic process	GO:0018901	0.11136	1	1	AFLA_062260	3	AFLA_062260	1	.	0	http://amigo.geneontology.org/cgi-bin/amigo/term_details?term=GO:0018901	no
regulation of atrial cardiac muscle cell action potential	GO:0098910	0.11136	1	1	AFLA_038590	3	AFLA_038590	1	.	0	http://amigo.geneontology.org/cgi-bin/amigo/term_details?term=GO:0098910	no
actin-mediated cell contraction	GO:0070252	0.11136	1	1	AFLA_038590	3	AFLA_038590	1	.	0	http://amigo.geneontology.org/cgi-bin/amigo/term_details?term=GO:0070252	no
atrial cardiac muscle cell to AV node cell signaling	GO:0086026	0.11136	1	1	AFLA_038590	3	AFLA_038590	1	.	0	http://amigo.geneontology.org/cgi-bin/amigo/term_details?term=GO:0086026	no
actin filament severing	GO:0051014	0.11136	1	1	AFLA_089900	3	.	0	AFLA_089900	1	http://amigo.geneontology.org/cgi-bin/amigo/term_details?term=GO:0051014	no
glutathione catabolic process	GO:0006751	0.11136	1	1	AFLA_035970	3	AFLA_035970	1	.	0	http://amigo.geneontology.org/cgi-bin/amigo/term_details?term=GO:0006751	no
sphingomyelin catabolic process	GO:0006685	0.11136	1	1	AFLA_003810	3	AFLA_003810	1	.	0	http://amigo.geneontology.org/cgi-bin/amigo/term_details?term=GO:0006685	no
regulation of peptide hormone secretion	GO:0090276	0.11136	1	1	AFLA_028740	3	AFLA_028740	1	.	0	http://amigo.geneontology.org/cgi-bin/amigo/term_details?term=GO:0090276	no
rhamnose catabolic process	GO:0019301	0.11136	1	1	AFLA_041410	3	.	0	AFLA_041410	1	http://amigo.geneontology.org/cgi-bin/amigo/term_details?term=GO:0019301	no
positive regulation of hormone secretion	GO:0046887	0.11136	1	1	AFLA_028740	3	AFLA_028740	1	.	0	http://amigo.geneontology.org/cgi-bin/amigo/term_details?term=GO:0046887	no
regulation of hormone secretion	GO:0046883	0.11136	1	1	AFLA_028740	3	AFLA_028740	1	.	0	http://amigo.geneontology.org/cgi-bin/amigo/term_details?term=GO:0046883	no
heart contraction	GO:0060047	0.11136	1	1	AFLA_038590	3	AFLA_038590	1	.	0	http://amigo.geneontology.org/cgi-bin/amigo/term_details?term=GO:0060047	no
T-tubule organization	GO:0033292	0.11136	1	1	AFLA_038590	3	AFLA_038590	1	.	0	http://amigo.geneontology.org/cgi-bin/amigo/term_details?term=GO:0033292	no
cardiac muscle cell contraction	GO:0086003	0.11136	1	1	AFLA_038590	3	AFLA_038590	1	.	0	http://amigo.geneontology.org/cgi-bin/amigo/term_details?term=GO:0086003	no
regulation of cardiac muscle cell contraction	GO:0086004	0.11136	1	1	AFLA_038590	3	AFLA_038590	1	.	0	http://amigo.geneontology.org/cgi-bin/amigo/term_details?term=GO:0086004	no
cardiac muscle contraction	GO:0060048	0.11136	1	1	AFLA_038590	3	AFLA_038590	1	.	0	http://amigo.geneontology.org/cgi-bin/amigo/term_details?term=GO:0060048	no
cardiac muscle cell action potential involved in contraction	GO:0086002	0.11136	1	1	AFLA_038590	3	AFLA_038590	1	.	0	http://amigo.geneontology.org/cgi-bin/amigo/term_details?term=GO:0086002	no
actin filament-based movement	GO:0030048	0.11136	1	1	AFLA_038590	3	AFLA_038590	1	.	0	http://amigo.geneontology.org/cgi-bin/amigo/term_details?term=GO:0030048	no
regulation of release of sequestered calcium ion into cytosol by sarcoplasmic reticulum	GO:0010880	0.11136	1	1	AFLA_038590	3	AFLA_038590	1	.	0	http://amigo.geneontology.org/cgi-bin/amigo/term_details?term=GO:0010880	no
regulation of cardiac muscle contraction by regulation of the release of sequestered calcium ion	GO:0010881	0.11136	1	1	AFLA_038590	3	AFLA_038590	1	.	0	http://amigo.geneontology.org/cgi-bin/amigo/term_details?term=GO:0010881	no
rRNA transport	GO:0051029	0.11136	1	1	AFLA_034340	3	.	0	AFLA_034340	1	http://amigo.geneontology.org/cgi-bin/amigo/term_details?term=GO:0051029	no
hexitol metabolic process	GO:0006059	0.11136	1	1	AFLA_122210	3	.	0	AFLA_122210	1	http://amigo.geneontology.org/cgi-bin/amigo/term_details?term=GO:0006059	no
rRNA export from nucleus	GO:0006407	0.11136	1	1	AFLA_034340	3	.	0	AFLA_034340	1	http://amigo.geneontology.org/cgi-bin/amigo/term_details?term=GO:0006407	no
histone-serine phosphorylation	GO:0035404	0.11136	1	1	AFLA_047300	3	.	0	AFLA_047300	1	http://amigo.geneontology.org/cgi-bin/amigo/term_details?term=GO:0035404	no
regulation of cardiac muscle cell action potential involved in regulation of contraction	GO:0098909	0.11136	1	1	AFLA_038590	3	AFLA_038590	1	.	0	http://amigo.geneontology.org/cgi-bin/amigo/term_details?term=GO:0098909	no
regulation of SA node cell action potential	GO:0098907	0.11136	1	1	AFLA_038590	3	AFLA_038590	1	.	0	http://amigo.geneontology.org/cgi-bin/amigo/term_details?term=GO:0098907	no
negative regulation of cytokine production	GO:0001818	0.11136	1	1	AFLA_071180	3	.	0	AFLA_071180	1	http://amigo.geneontology.org/cgi-bin/amigo/term_details?term=GO:0001818	no
regulation of striated muscle contraction	GO:0006942	0.11136	1	1	AFLA_038590	3	AFLA_038590	1	.	0	http://amigo.geneontology.org/cgi-bin/amigo/term_details?term=GO:0006942	no
regulation of calcium-mediated signaling	GO:0050848	0.11136	1	1	AFLA_068440	3	AFLA_068440	1	.	0	http://amigo.geneontology.org/cgi-bin/amigo/term_details?term=GO:0050848	no
regulation of G-protein coupled receptor protein signaling pathway	GO:0008277	0.11136	1	1	AFLA_093230	3	AFLA_093230	1	.	0	http://amigo.geneontology.org/cgi-bin/amigo/term_details?term=GO:0008277	no
regulation of cardiac muscle contraction by calcium ion signaling	GO:0010882	0.11136	1	1	AFLA_038590	3	AFLA_038590	1	.	0	http://amigo.geneontology.org/cgi-bin/amigo/term_details?term=GO:0010882	no
nucleolus organization	GO:0007000	0.11136	1	1	AFLA_047300	3	.	0	AFLA_047300	1	http://amigo.geneontology.org/cgi-bin/amigo/term_details?term=GO:0007000	no
regulation of cardiac muscle contraction	GO:0055117	0.11136	1	1	AFLA_038590	3	AFLA_038590	1	.	0	http://amigo.geneontology.org/cgi-bin/amigo/term_details?term=GO:0055117	no
positive regulation of epithelial cell migration	GO:0010634	0.11136	1	1	AFLA_075840	3	.	0	AFLA_075840	1	http://amigo.geneontology.org/cgi-bin/amigo/term_details?term=GO:0010634	no
ketone body catabolic process	GO:0046952	0.11136	1	1	AFLA_028740	3	AFLA_028740	1	.	0	http://amigo.geneontology.org/cgi-bin/amigo/term_details?term=GO:0046952	no
calcium ion import	GO:0070509	0.11136	1	1	AFLA_068440	3	AFLA_068440	1	.	0	http://amigo.geneontology.org/cgi-bin/amigo/term_details?term=GO:0070509	no
SA node cell action potential	GO:0086015	0.11136	1	1	AFLA_038590	3	AFLA_038590	1	.	0	http://amigo.geneontology.org/cgi-bin/amigo/term_details?term=GO:0086015	no
cell-cell signaling involved in cardiac conduction	GO:0086019	0.11136	1	1	AFLA_038590	3	AFLA_038590	1	.	0	http://amigo.geneontology.org/cgi-bin/amigo/term_details?term=GO:0086019	no
stomatal movement	GO:0010118	0.11136	1	1	AFLA_009750	3	.	0	AFLA_009750	1	http://amigo.geneontology.org/cgi-bin/amigo/term_details?term=GO:0010118	no
regulation of stomatal movement	GO:0010119	0.11136	1	1	AFLA_009750	3	.	0	AFLA_009750	1	http://amigo.geneontology.org/cgi-bin/amigo/term_details?term=GO:0010119	no
protein localization to nucleolar rDNA repeats	GO:0034503	0.11136	1	1	AFLA_047300	3	.	0	AFLA_047300	1	http://amigo.geneontology.org/cgi-bin/amigo/term_details?term=GO:0034503	no
sarcoplasmic reticulum calcium ion transport	GO:0070296	0.11136	1	1	AFLA_038590	3	AFLA_038590	1	.	0	http://amigo.geneontology.org/cgi-bin/amigo/term_details?term=GO:0070296	no
regulation of muscle contraction	GO:0006937	0.11136	1	1	AFLA_038590	3	AFLA_038590	1	.	0	http://amigo.geneontology.org/cgi-bin/amigo/term_details?term=GO:0006937	no
cell communication involved in cardiac conduction	GO:0086065	0.11136	1	1	AFLA_038590	3	AFLA_038590	1	.	0	http://amigo.geneontology.org/cgi-bin/amigo/term_details?term=GO:0086065	no
atrial cardiac muscle cell to AV node cell communication	GO:0086066	0.11136	1	1	AFLA_038590	3	AFLA_038590	1	.	0	http://amigo.geneontology.org/cgi-bin/amigo/term_details?term=GO:0086066	no
SA node cell to atrial cardiac muscle cell communication	GO:0086070	0.11136	1	1	AFLA_038590	3	AFLA_038590	1	.	0	http://amigo.geneontology.org/cgi-bin/amigo/term_details?term=GO:0086070	no
protein refolding	GO:0042026	0.11136	1	1	AFLA_093230	3	AFLA_093230	1	.	0	http://amigo.geneontology.org/cgi-bin/amigo/term_details?term=GO:0042026	no
eisosome assembly	GO:0070941	0.11136	1	1	AFLA_052640	3	AFLA_052640	1	.	0	http://amigo.geneontology.org/cgi-bin/amigo/term_details?term=GO:0070941	no
TOR signaling	GO:0031929	0.11199	1	2	AFLA_031780|AFLA_052640	15	AFLA_052640	1	AFLA_031780	1	http://amigo.geneontology.org/cgi-bin/amigo/term_details?term=GO:0031929	no
dicarboxylic acid catabolic process	GO:0043649	0.11199	1	2	AFLA_107840|AFLA_108930	15	AFLA_108930	1	AFLA_107840	1	http://amigo.geneontology.org/cgi-bin/amigo/term_details?term=GO:0043649	no
monocarboxylic acid biosynthetic process	GO:0072330	0.11405	1	9	AFLA_024750|AFLA_030430|AFLA_106350|AFLA_107840|AFLA_108930|AFLA_060700|AFLA_044460|AFLA_066620|AFLA_071180	147	AFLA_106350|AFLA_108930|AFLA_066620	3	AFLA_024750|AFLA_030430|AFLA_107840|AFLA_060700|AFLA_044460|AFLA_071180	6	http://amigo.geneontology.org/cgi-bin/amigo/term_details?term=GO:0072330	no
single-organism developmental process	GO:0044767	0.11435	1	22	AFLA_023600|AFLA_028740|AFLA_036440|AFLA_110340|AFLA_009750|AFLA_073340|AFLA_075840|AFLA_082850|AFLA_083110|AFLA_123350|AFLA_128330|AFLA_019060|AFLA_038590|AFLA_044790|AFLA_099280|AFLA_065130|AFLA_066700|AFLA_071180|AFLA_003220|AFLA_131330|AFLA_137060|AFLA_138560	435	AFLA_023600|AFLA_028740|AFLA_110340|AFLA_073340|AFLA_083110|AFLA_128330|AFLA_038590|AFLA_044790|AFLA_003220|AFLA_131330|AFLA_137060|AFLA_138560	12	AFLA_036440|AFLA_009750|AFLA_075840|AFLA_082850|AFLA_123350|AFLA_019060|AFLA_099280|AFLA_065130|AFLA_066700|AFLA_071180	10	http://amigo.geneontology.org/cgi-bin/amigo/term_details?term=GO:0044767	no
multi-organism process	GO:0051704	0.11539	1	19	AFLA_031050|AFLA_109820|AFLA_060680|AFLA_078060|AFLA_127130|AFLA_128330|AFLA_038650|AFLA_046070|AFLA_098090|AFLA_066700|AFLA_066720|AFLA_069330|AFLA_071180|AFLA_003220|AFLA_003810|AFLA_131330|AFLA_132650|AFLA_050300|AFLA_137060	367	AFLA_078060|AFLA_127130|AFLA_128330|AFLA_038650|AFLA_046070|AFLA_098090|AFLA_003220|AFLA_003810|AFLA_131330|AFLA_132650|AFLA_050300|AFLA_137060	12	AFLA_031050|AFLA_109820|AFLA_060680|AFLA_066700|AFLA_066720|AFLA_069330|AFLA_071180	7	http://amigo.geneontology.org/cgi-bin/amigo/term_details?term=GO:0051704	no
cellular ion homeostasis	GO:0006873	0.12071	1	8	AFLA_032000|AFLA_077030|AFLA_126510|AFLA_038590|AFLA_129430|AFLA_068440|AFLA_003980|AFLA_050180	128	AFLA_032000|AFLA_038590|AFLA_129430|AFLA_068440	4	AFLA_077030|AFLA_126510|AFLA_003980|AFLA_050180	4	http://amigo.geneontology.org/cgi-bin/amigo/term_details?term=GO:0006873	no
tryptophan catabolic process	GO:0006569	0.12486	1	2	AFLA_015920|AFLA_071180	16	.	0	AFLA_015920|AFLA_071180	2	http://amigo.geneontology.org/cgi-bin/amigo/term_details?term=GO:0006569	no
localization of cell	GO:0051674	0.12486	1	2	AFLA_075840|AFLA_003220	16	AFLA_003220	1	AFLA_075840	1	http://amigo.geneontology.org/cgi-bin/amigo/term_details?term=GO:0051674	no
regulation of membrane potential	GO:0042391	0.12486	1	2	AFLA_038590|AFLA_068440	16	AFLA_038590|AFLA_068440	2	.	0	http://amigo.geneontology.org/cgi-bin/amigo/term_details?term=GO:0042391	no
aromatic amino acid family biosynthetic process	GO:0009073	0.12486	1	2	AFLA_110930|AFLA_066210	16	.	0	AFLA_110930|AFLA_066210	2	http://amigo.geneontology.org/cgi-bin/amigo/term_details?term=GO:0009073	no
polyol catabolic process	GO:0046174	0.12486	1	2	AFLA_093790|AFLA_044400	16	.	0	AFLA_093790|AFLA_044400	2	http://amigo.geneontology.org/cgi-bin/amigo/term_details?term=GO:0046174	no
indole-containing compound catabolic process	GO:0042436	0.12486	1	2	AFLA_015920|AFLA_071180	16	.	0	AFLA_015920|AFLA_071180	2	http://amigo.geneontology.org/cgi-bin/amigo/term_details?term=GO:0042436	no
indolalkylamine catabolic process	GO:0046218	0.12486	1	2	AFLA_015920|AFLA_071180	16	.	0	AFLA_015920|AFLA_071180	2	http://amigo.geneontology.org/cgi-bin/amigo/term_details?term=GO:0046218	no
cell motility	GO:0048870	0.12486	1	2	AFLA_075840|AFLA_003220	16	AFLA_003220	1	AFLA_075840	1	http://amigo.geneontology.org/cgi-bin/amigo/term_details?term=GO:0048870	no
cellular response to pheromone	GO:0071444	0.12486	1	2	AFLA_003220|AFLA_050300	16	AFLA_003220|AFLA_050300	2	.	0	http://amigo.geneontology.org/cgi-bin/amigo/term_details?term=GO:0071444	no
glucose metabolic process	GO:0006006	0.12584	1	4	AFLA_035030|AFLA_112010|AFLA_042390|AFLA_101470	50	AFLA_035030|AFLA_112010|AFLA_042390|AFLA_101470	4	.	0	http://amigo.geneontology.org/cgi-bin/amigo/term_details?term=GO:0006006	no
regulation of homeostatic process	GO:0032844	0.133	1	3	AFLA_028740|AFLA_038590|AFLA_003980	33	AFLA_028740|AFLA_038590	2	AFLA_003980	1	http://amigo.geneontology.org/cgi-bin/amigo/term_details?term=GO:0032844	no
developmental process	GO:0032502	0.13338	1	22	AFLA_023600|AFLA_028740|AFLA_036440|AFLA_110340|AFLA_009750|AFLA_073340|AFLA_075840|AFLA_082850|AFLA_083110|AFLA_123350|AFLA_128330|AFLA_019060|AFLA_038590|AFLA_044790|AFLA_099280|AFLA_065130|AFLA_066700|AFLA_071180|AFLA_003220|AFLA_131330|AFLA_137060|AFLA_138560	444	AFLA_023600|AFLA_028740|AFLA_110340|AFLA_073340|AFLA_083110|AFLA_128330|AFLA_038590|AFLA_044790|AFLA_003220|AFLA_131330|AFLA_137060|AFLA_138560	12	AFLA_036440|AFLA_009750|AFLA_075840|AFLA_082850|AFLA_123350|AFLA_019060|AFLA_099280|AFLA_065130|AFLA_066700|AFLA_071180	10	http://amigo.geneontology.org/cgi-bin/amigo/term_details?term=GO:0032502	no
anatomical structure development	GO:0048856	0.13628	1	19	AFLA_023600|AFLA_028740|AFLA_110340|AFLA_009750|AFLA_075840|AFLA_082850|AFLA_083110|AFLA_123350|AFLA_128330|AFLA_019060|AFLA_038590|AFLA_044790|AFLA_065130|AFLA_066700|AFLA_071180|AFLA_003220|AFLA_131330|AFLA_137060|AFLA_138560	376	AFLA_023600|AFLA_028740|AFLA_110340|AFLA_083110|AFLA_128330|AFLA_038590|AFLA_044790|AFLA_003220|AFLA_131330|AFLA_137060|AFLA_138560	11	AFLA_009750|AFLA_075840|AFLA_082850|AFLA_123350|AFLA_019060|AFLA_065130|AFLA_066700|AFLA_071180	8	http://amigo.geneontology.org/cgi-bin/amigo/term_details?term=GO:0048856	no
potassium ion transport	GO:0006813	0.13806	1	2	AFLA_110050|AFLA_038590	17	AFLA_038590	1	AFLA_110050	1	http://amigo.geneontology.org/cgi-bin/amigo/term_details?term=GO:0006813	no
second-messenger-mediated signaling	GO:0019932	0.13806	1	2	AFLA_038590|AFLA_068440	17	AFLA_038590|AFLA_068440	2	.	0	http://amigo.geneontology.org/cgi-bin/amigo/term_details?term=GO:0019932	no
phospholipid catabolic process	GO:0009395	0.13806	1	2	AFLA_110960|AFLA_003810	17	AFLA_110960|AFLA_003810	2	.	0	http://amigo.geneontology.org/cgi-bin/amigo/term_details?term=GO:0009395	no
cation homeostasis	GO:0055080	0.14006	1	9	AFLA_032000|AFLA_075860|AFLA_077030|AFLA_126510|AFLA_038590|AFLA_129430|AFLA_068440|AFLA_003980|AFLA_050180	154	AFLA_032000|AFLA_075860|AFLA_038590|AFLA_129430|AFLA_068440	5	AFLA_077030|AFLA_126510|AFLA_003980|AFLA_050180	4	http://amigo.geneontology.org/cgi-bin/amigo/term_details?term=GO:0055080	no
response to gravity	GO:0009629	0.14566	1	1	AFLA_009750	4	.	0	AFLA_009750	1	http://amigo.geneontology.org/cgi-bin/amigo/term_details?term=GO:0009629	no
putrescine biosynthetic process from ornithine	GO:0033387	0.14566	1	1	AFLA_138430	4	.	0	AFLA_138430	1	http://amigo.geneontology.org/cgi-bin/amigo/term_details?term=GO:0033387	no
tropism	GO:0009606	0.14566	1	1	AFLA_009750	4	.	0	AFLA_009750	1	http://amigo.geneontology.org/cgi-bin/amigo/term_details?term=GO:0009606	no
response to iron ion	GO:0010039	0.14566	1	1	AFLA_050180	4	.	0	AFLA_050180	1	http://amigo.geneontology.org/cgi-bin/amigo/term_details?term=GO:0010039	no
peptide secretion	GO:0002790	0.14566	1	1	AFLA_028740	4	AFLA_028740	1	.	0	http://amigo.geneontology.org/cgi-bin/amigo/term_details?term=GO:0002790	no
fermentation	GO:0006113	0.14566	1	1	AFLA_005130	4	.	0	AFLA_005130	1	http://amigo.geneontology.org/cgi-bin/amigo/term_details?term=GO:0006113	no
cellular hypotonic response	GO:0071476	0.14566	1	1	AFLA_075860	4	AFLA_075860	1	.	0	http://amigo.geneontology.org/cgi-bin/amigo/term_details?term=GO:0071476	no
gravitropism	GO:0009630	0.14566	1	1	AFLA_009750	4	.	0	AFLA_009750	1	http://amigo.geneontology.org/cgi-bin/amigo/term_details?term=GO:0009630	no
regulation of inflammatory response	GO:0050727	0.14566	1	1	AFLA_071180	4	.	0	AFLA_071180	1	http://amigo.geneontology.org/cgi-bin/amigo/term_details?term=GO:0050727	no
allantoin metabolic process	GO:0000255	0.14566	1	1	AFLA_063160	4	.	0	AFLA_063160	1	http://amigo.geneontology.org/cgi-bin/amigo/term_details?term=GO:0000255	no
allantoin catabolic process	GO:0000256	0.14566	1	1	AFLA_063160	4	.	0	AFLA_063160	1	http://amigo.geneontology.org/cgi-bin/amigo/term_details?term=GO:0000256	no
tryptophan catabolic process to kynurenine	GO:0019441	0.14566	1	1	AFLA_071180	4	.	0	AFLA_071180	1	http://amigo.geneontology.org/cgi-bin/amigo/term_details?term=GO:0019441	no
cadmium ion transport	GO:0015691	0.14566	1	1	AFLA_126510	4	.	0	AFLA_126510	1	http://amigo.geneontology.org/cgi-bin/amigo/term_details?term=GO:0015691	no
hemolysis in other organism	GO:0044179	0.14566	1	1	AFLA_003810	4	AFLA_003810	1	.	0	http://amigo.geneontology.org/cgi-bin/amigo/term_details?term=GO:0044179	no
heart morphogenesis	GO:0003007	0.14566	1	1	AFLA_075840	4	.	0	AFLA_075840	1	http://amigo.geneontology.org/cgi-bin/amigo/term_details?term=GO:0003007	no
phosphatidic acid biosynthetic process	GO:0006654	0.14566	1	1	AFLA_003220	4	AFLA_003220	1	.	0	http://amigo.geneontology.org/cgi-bin/amigo/term_details?term=GO:0006654	no
regulation of translational initiation in response to stress	GO:0043558	0.14566	1	1	AFLA_031780	4	.	0	AFLA_031780	1	http://amigo.geneontology.org/cgi-bin/amigo/term_details?term=GO:0043558	no
ovulation cycle	GO:0042698	0.14566	1	1	AFLA_075840	4	.	0	AFLA_075840	1	http://amigo.geneontology.org/cgi-bin/amigo/term_details?term=GO:0042698	no
phenylacetate catabolic process	GO:0010124	0.14566	1	1	AFLA_024750	4	.	0	AFLA_024750	1	http://amigo.geneontology.org/cgi-bin/amigo/term_details?term=GO:0010124	no
regulation of peptide transport	GO:0090087	0.14566	1	1	AFLA_028740	4	AFLA_028740	1	.	0	http://amigo.geneontology.org/cgi-bin/amigo/term_details?term=GO:0090087	no
ameboidal-type cell migration	GO:0001667	0.14566	1	1	AFLA_075840	4	.	0	AFLA_075840	1	http://amigo.geneontology.org/cgi-bin/amigo/term_details?term=GO:0001667	no
cell morphogenesis involved in conjugation with cellular fusion	GO:0000753	0.14566	1	1	AFLA_003220	4	AFLA_003220	1	.	0	http://amigo.geneontology.org/cgi-bin/amigo/term_details?term=GO:0000753	no
sphingomyelin metabolic process	GO:0006684	0.14566	1	1	AFLA_003810	4	AFLA_003810	1	.	0	http://amigo.geneontology.org/cgi-bin/amigo/term_details?term=GO:0006684	no
regulation of release of sequestered calcium ion into cytosol	GO:0051279	0.14566	1	1	AFLA_038590	4	AFLA_038590	1	.	0	http://amigo.geneontology.org/cgi-bin/amigo/term_details?term=GO:0051279	no
inositol catabolic process	GO:0019310	0.14566	1	1	AFLA_044400	4	.	0	AFLA_044400	1	http://amigo.geneontology.org/cgi-bin/amigo/term_details?term=GO:0019310	no
tissue migration	GO:0090130	0.14566	1	1	AFLA_075840	4	.	0	AFLA_075840	1	http://amigo.geneontology.org/cgi-bin/amigo/term_details?term=GO:0090130	no
epithelium migration	GO:0090132	0.14566	1	1	AFLA_075840	4	.	0	AFLA_075840	1	http://amigo.geneontology.org/cgi-bin/amigo/term_details?term=GO:0090132	no
negative regulation of sequestering of calcium ion	GO:0051283	0.14566	1	1	AFLA_038590	4	AFLA_038590	1	.	0	http://amigo.geneontology.org/cgi-bin/amigo/term_details?term=GO:0051283	no
regulation of sequestering of calcium ion	GO:0051282	0.14566	1	1	AFLA_038590	4	AFLA_038590	1	.	0	http://amigo.geneontology.org/cgi-bin/amigo/term_details?term=GO:0051282	no
FAD transport	GO:0015883	0.14566	1	1	AFLA_075860	4	AFLA_075860	1	.	0	http://amigo.geneontology.org/cgi-bin/amigo/term_details?term=GO:0015883	no
cellular response to interleukin-1	GO:0071347	0.14566	1	1	AFLA_075840	4	.	0	AFLA_075840	1	http://amigo.geneontology.org/cgi-bin/amigo/term_details?term=GO:0071347	no
TORC2 signaling	GO:0038203	0.14566	1	1	AFLA_052640	4	AFLA_052640	1	.	0	http://amigo.geneontology.org/cgi-bin/amigo/term_details?term=GO:0038203	no
positive regulation of cell motility	GO:2000147	0.14566	1	1	AFLA_075840	4	.	0	AFLA_075840	1	http://amigo.geneontology.org/cgi-bin/amigo/term_details?term=GO:2000147	no
response to interleukin-1	GO:0070555	0.14566	1	1	AFLA_075840	4	.	0	AFLA_075840	1	http://amigo.geneontology.org/cgi-bin/amigo/term_details?term=GO:0070555	no
regulation of epithelial cell migration	GO:0010632	0.14566	1	1	AFLA_075840	4	.	0	AFLA_075840	1	http://amigo.geneontology.org/cgi-bin/amigo/term_details?term=GO:0010632	no
rhamnose metabolic process	GO:0019299	0.14566	1	1	AFLA_041410	4	.	0	AFLA_041410	1	http://amigo.geneontology.org/cgi-bin/amigo/term_details?term=GO:0019299	no
insulin secretion	GO:0030073	0.14566	1	1	AFLA_028740	4	AFLA_028740	1	.	0	http://amigo.geneontology.org/cgi-bin/amigo/term_details?term=GO:0030073	no
peptide hormone secretion	GO:0030072	0.14566	1	1	AFLA_028740	4	AFLA_028740	1	.	0	http://amigo.geneontology.org/cgi-bin/amigo/term_details?term=GO:0030072	no
alditol biosynthetic process	GO:0019401	0.14566	1	1	AFLA_122210	4	.	0	AFLA_122210	1	http://amigo.geneontology.org/cgi-bin/amigo/term_details?term=GO:0019401	no
release of sequestered calcium ion into cytosol	GO:0051209	0.14566	1	1	AFLA_038590	4	AFLA_038590	1	.	0	http://amigo.geneontology.org/cgi-bin/amigo/term_details?term=GO:0051209	no
positive regulation of cell migration	GO:0030335	0.14566	1	1	AFLA_075840	4	.	0	AFLA_075840	1	http://amigo.geneontology.org/cgi-bin/amigo/term_details?term=GO:0030335	no
ether catabolic process	GO:1901502	0.14566	1	1	AFLA_062260	4	AFLA_062260	1	.	0	http://amigo.geneontology.org/cgi-bin/amigo/term_details?term=GO:1901502	no
epithelial cell migration	GO:0010631	0.14566	1	1	AFLA_075840	4	.	0	AFLA_075840	1	http://amigo.geneontology.org/cgi-bin/amigo/term_details?term=GO:0010631	no
cell morphogenesis involved in conjugation	GO:0000767	0.14566	1	1	AFLA_003220	4	AFLA_003220	1	.	0	http://amigo.geneontology.org/cgi-bin/amigo/term_details?term=GO:0000767	no
muscle contraction	GO:0006936	0.14566	1	1	AFLA_038590	4	AFLA_038590	1	.	0	http://amigo.geneontology.org/cgi-bin/amigo/term_details?term=GO:0006936	no
hormone secretion	GO:0046879	0.14566	1	1	AFLA_028740	4	AFLA_028740	1	.	0	http://amigo.geneontology.org/cgi-bin/amigo/term_details?term=GO:0046879	no
positive regulation of epithelial cell proliferation	GO:0050679	0.14566	1	1	AFLA_075840	4	.	0	AFLA_075840	1	http://amigo.geneontology.org/cgi-bin/amigo/term_details?term=GO:0050679	no
positive regulation of translational fidelity	GO:0045903	0.14566	1	1	AFLA_101160	4	.	0	AFLA_101160	1	http://amigo.geneontology.org/cgi-bin/amigo/term_details?term=GO:0045903	no
reproductive process in single-celled organism	GO:0022413	0.14677	1	4	AFLA_073340|AFLA_066700|AFLA_003220|AFLA_137060	53	AFLA_073340|AFLA_003220|AFLA_137060	3	AFLA_066700	1	http://amigo.geneontology.org/cgi-bin/amigo/term_details?term=GO:0022413	no
cellular iron ion homeostasis	GO:0006879	0.1511	1	3	AFLA_077030|AFLA_126510|AFLA_050180	35	.	0	AFLA_077030|AFLA_126510|AFLA_050180	3	http://amigo.geneontology.org/cgi-bin/amigo/term_details?term=GO:0006879	no
formation of translation preinitiation complex	GO:0001731	0.15155	1	2	AFLA_041730|AFLA_131470	18	.	0	AFLA_041730|AFLA_131470	2	http://amigo.geneontology.org/cgi-bin/amigo/term_details?term=GO:0001731	no
cellular response to inorganic substance	GO:0071241	0.15155	1	2	AFLA_131330|AFLA_050180	18	AFLA_131330	1	AFLA_050180	1	http://amigo.geneontology.org/cgi-bin/amigo/term_details?term=GO:0071241	no
cellular response to metal ion	GO:0071248	0.15155	1	2	AFLA_131330|AFLA_050180	18	AFLA_131330	1	AFLA_050180	1	http://amigo.geneontology.org/cgi-bin/amigo/term_details?term=GO:0071248	no
regulation of ion homeostasis	GO:2000021	0.15155	1	2	AFLA_038590|AFLA_003980	18	AFLA_038590	1	AFLA_003980	1	http://amigo.geneontology.org/cgi-bin/amigo/term_details?term=GO:2000021	no
dicarboxylic acid metabolic process	GO:0043648	0.15431	1	6	AFLA_107840|AFLA_108930|AFLA_110930|AFLA_078420|AFLA_122560|AFLA_066210	94	AFLA_108930|AFLA_122560	2	AFLA_107840|AFLA_110930|AFLA_078420|AFLA_066210	4	http://amigo.geneontology.org/cgi-bin/amigo/term_details?term=GO:0043648	no
translational initiation	GO:0006413	0.16043	1	3	AFLA_031780|AFLA_041730|AFLA_131470	36	.	0	AFLA_031780|AFLA_041730|AFLA_131470	3	http://amigo.geneontology.org/cgi-bin/amigo/term_details?term=GO:0006413	no
chitin metabolic process	GO:0006030	0.16043	1	3	AFLA_031380|AFLA_054470|AFLA_137200	36	AFLA_031380|AFLA_054470|AFLA_137200	3	.	0	http://amigo.geneontology.org/cgi-bin/amigo/term_details?term=GO:0006030	no
transition metal ion transport	GO:0000041	0.16142	1	4	AFLA_126510|AFLA_045770|AFLA_003980|AFLA_050180	55	AFLA_045770	1	AFLA_126510|AFLA_003980|AFLA_050180	3	http://amigo.geneontology.org/cgi-bin/amigo/term_details?term=GO:0000041	no
reproduction of a single-celled organism	GO:0032505	0.16252	1	5	AFLA_011230|AFLA_073340|AFLA_066700|AFLA_003220|AFLA_137060	75	AFLA_011230|AFLA_073340|AFLA_003220|AFLA_137060	4	AFLA_066700	1	http://amigo.geneontology.org/cgi-bin/amigo/term_details?term=GO:0032505	no
sterol biosynthetic process	GO:0016126	0.16252	1	5	AFLA_030250|AFLA_119710|AFLA_065130|AFLA_065740|AFLA_138560	75	AFLA_030250|AFLA_119710|AFLA_138560	3	AFLA_065130|AFLA_065740	2	http://amigo.geneontology.org/cgi-bin/amigo/term_details?term=GO:0016126	no
organic hydroxy compound biosynthetic process	GO:1901617	0.16458	1	9	AFLA_030250|AFLA_036110|AFLA_110890|AFLA_125270|AFLA_119710|AFLA_122210|AFLA_065130|AFLA_065740|AFLA_138560	160	AFLA_030250|AFLA_110890|AFLA_119710|AFLA_138560	4	AFLA_036110|AFLA_125270|AFLA_122210|AFLA_065130|AFLA_065740	5	http://amigo.geneontology.org/cgi-bin/amigo/term_details?term=GO:1901617	no
vacuole fusion, non-autophagic	GO:0042144	0.16528	1	2	AFLA_056120|AFLA_003270	19	AFLA_056120|AFLA_003270	2	.	0	http://amigo.geneontology.org/cgi-bin/amigo/term_details?term=GO:0042144	no
negative regulation of apoptotic process	GO:0043066	0.16528	1	2	AFLA_031780|AFLA_071180	19	.	0	AFLA_031780|AFLA_071180	2	http://amigo.geneontology.org/cgi-bin/amigo/term_details?term=GO:0043066	no
vasculature development	GO:0001944	0.16528	1	2	AFLA_110340|AFLA_075840	19	AFLA_110340	1	AFLA_075840	1	http://amigo.geneontology.org/cgi-bin/amigo/term_details?term=GO:0001944	no
polyol biosynthetic process	GO:0046173	0.16528	1	2	AFLA_110890|AFLA_122210	19	AFLA_110890	1	AFLA_122210	1	http://amigo.geneontology.org/cgi-bin/amigo/term_details?term=GO:0046173	no
blood vessel development	GO:0001568	0.16528	1	2	AFLA_110340|AFLA_075840	19	AFLA_110340	1	AFLA_075840	1	http://amigo.geneontology.org/cgi-bin/amigo/term_details?term=GO:0001568	no
chitin catabolic process	GO:0006032	0.16528	1	2	AFLA_031380|AFLA_054470	19	AFLA_031380|AFLA_054470	2	.	0	http://amigo.geneontology.org/cgi-bin/amigo/term_details?term=GO:0006032	no
organic heteropentacyclic compound biosynthetic process	GO:1901378	0.16888	1	5	AFLA_058760|AFLA_118100|AFLA_065570|AFLA_002920|AFLA_138050	76	AFLA_065570	1	AFLA_058760|AFLA_118100|AFLA_002920|AFLA_138050	4	http://amigo.geneontology.org/cgi-bin/amigo/term_details?term=GO:1901378	no
organic heteropentacyclic compound metabolic process	GO:1901376	0.16888	1	5	AFLA_058760|AFLA_118100|AFLA_065570|AFLA_002920|AFLA_138050	76	AFLA_065570	1	AFLA_058760|AFLA_118100|AFLA_002920|AFLA_138050	4	http://amigo.geneontology.org/cgi-bin/amigo/term_details?term=GO:1901376	no
cellular component assembly involved in morphogenesis	GO:0010927	0.16994	1	3	AFLA_066700|AFLA_003220|AFLA_137060	37	AFLA_003220|AFLA_137060	2	AFLA_066700	1	http://amigo.geneontology.org/cgi-bin/amigo/term_details?term=GO:0010927	no
post-Golgi vesicle-mediated transport	GO:0006892	0.16994	1	3	AFLA_089900|AFLA_045960|AFLA_046150	37	AFLA_045960|AFLA_046150	2	AFLA_089900	1	http://amigo.geneontology.org/cgi-bin/amigo/term_details?term=GO:0006892	no
alcohol biosynthetic process	GO:0046165	0.17018	1	7	AFLA_030250|AFLA_110890|AFLA_119710|AFLA_122210|AFLA_065130|AFLA_065740|AFLA_138560	118	AFLA_030250|AFLA_110890|AFLA_119710|AFLA_138560	4	AFLA_122210|AFLA_065130|AFLA_065740	3	http://amigo.geneontology.org/cgi-bin/amigo/term_details?term=GO:0046165	no
ion homeostasis	GO:0050801	0.17318	1	9	AFLA_032000|AFLA_075860|AFLA_077030|AFLA_126510|AFLA_038590|AFLA_129430|AFLA_068440|AFLA_003980|AFLA_050180	162	AFLA_032000|AFLA_075860|AFLA_038590|AFLA_129430|AFLA_068440	5	AFLA_077030|AFLA_126510|AFLA_003980|AFLA_050180	4	http://amigo.geneontology.org/cgi-bin/amigo/term_details?term=GO:0050801	no
carbohydrate catabolic process	GO:0016052	0.17516	1	16	AFLA_023490|AFLA_031380|AFLA_063040|AFLA_063680|AFLA_054470|AFLA_011230|AFLA_125700|AFLA_081980|AFLA_087870|AFLA_122400|AFLA_093790|AFLA_041410|AFLA_042390|AFLA_044400|AFLA_101470|AFLA_070170	321	AFLA_023490|AFLA_031380|AFLA_054470|AFLA_011230|AFLA_087870|AFLA_042390|AFLA_101470	7	AFLA_063040|AFLA_063680|AFLA_125700|AFLA_081980|AFLA_122400|AFLA_093790|AFLA_041410|AFLA_044400|AFLA_070170	9	http://amigo.geneontology.org/cgi-bin/amigo/term_details?term=GO:0016052	no
hexose metabolic process	GO:0019318	0.17535	1	5	AFLA_035030|AFLA_112010|AFLA_041410|AFLA_042390|AFLA_101470	77	AFLA_035030|AFLA_112010|AFLA_042390|AFLA_101470	4	AFLA_041410	1	http://amigo.geneontology.org/cgi-bin/amigo/term_details?term=GO:0019318	no
endocytosis	GO:0006897	0.17658	1	4	AFLA_078270|AFLA_089900|AFLA_098090|AFLA_098330	57	AFLA_078270|AFLA_098090|AFLA_098330	3	AFLA_089900	1	http://amigo.geneontology.org/cgi-bin/amigo/term_details?term=GO:0006897	no
cell development	GO:0048468	0.17664	1	6	AFLA_110340|AFLA_075840|AFLA_038590|AFLA_066700|AFLA_003220|AFLA_137060	98	AFLA_110340|AFLA_038590|AFLA_003220|AFLA_137060	4	AFLA_075840|AFLA_066700	2	http://amigo.geneontology.org/cgi-bin/amigo/term_details?term=GO:0048468	no
cell differentiation	GO:0030154	0.17716	1	12	AFLA_023600|AFLA_110340|AFLA_073340|AFLA_075840|AFLA_082850|AFLA_083110|AFLA_128330|AFLA_038590|AFLA_044790|AFLA_066700|AFLA_003220|AFLA_137060	230	AFLA_023600|AFLA_110340|AFLA_073340|AFLA_083110|AFLA_128330|AFLA_038590|AFLA_044790|AFLA_003220|AFLA_137060	9	AFLA_075840|AFLA_082850|AFLA_066700	3	http://amigo.geneontology.org/cgi-bin/amigo/term_details?term=GO:0030154	no
single-organism biosynthetic process	GO:0044711	0.17792	1	51	AFLA_024750|AFLA_030250|AFLA_030430|AFLA_035030|AFLA_036110|AFLA_036440|AFLA_106350|AFLA_107840|AFLA_108930|AFLA_110890|AFLA_110930|AFLA_112010|AFLA_058760|AFLA_060530|AFLA_060700|AFLA_063420|AFLA_012050|AFLA_012080|AFLA_073340|AFLA_125270|AFLA_075840|AFLA_077580|AFLA_079230|AFLA_084230|AFLA_123350|AFLA_116430|AFLA_118100|AFLA_119710|AFLA_122210|AFLA_122560|AFLA_093230|AFLA_021700|AFLA_041430|AFL…	1167	AFLA_030250|AFLA_035030|AFLA_106350|AFLA_108930|AFLA_110890|AFLA_112010|AFLA_073340|AFLA_077580|AFLA_116430|AFLA_119710|AFLA_122560|AFLA_093230|AFLA_103000|AFLA_065570|AFLA_066620|AFLA_001850|AFLA_003220|AFLA_134090|AFLA_137200|AFLA_138560	20	AFLA_024750|AFLA_030430|AFLA_036110|AFLA_036440|AFLA_107840|AFLA_110930|AFLA_058760|AFLA_060530|AFLA_060700|AFLA_063420|AFLA_012050|AFLA_012080|AFLA_125270|AFLA_075840|AFLA_079230|AFLA_084230|AFLA_123350|AFLA_118100|AFLA_122210|AFLA_021700|AFLA_041430|AFLA_044400|AFLA_044460|AFLA_064290|AFLA_065130|AFLA_065740|AFLA_066210|AFLA_071180|AFLA_002920|AFLA_138050|AFLA_138430	31	http://amigo.geneontology.org/cgi-bin/amigo/term_details?term=GO:0044711	no
protein palmitoylation	GO:0018345	0.17864	1	1	AFLA_003270	5	AFLA_003270	1	.	0	http://amigo.geneontology.org/cgi-bin/amigo/term_details?term=GO:0018345	no
protein localization to cell surface	GO:0034394	0.17864	1	1	AFLA_038590	5	AFLA_038590	1	.	0	http://amigo.geneontology.org/cgi-bin/amigo/term_details?term=GO:0034394	no
oxylipin metabolic process	GO:0031407	0.17864	1	1	AFLA_044460	5	.	0	AFLA_044460	1	http://amigo.geneontology.org/cgi-bin/amigo/term_details?term=GO:0031407	no
membrane lipid catabolic process	GO:0046466	0.17864	1	1	AFLA_003810	5	AFLA_003810	1	.	0	http://amigo.geneontology.org/cgi-bin/amigo/term_details?term=GO:0046466	no
homotypic cell-cell adhesion	GO:0034109	0.17864	1	1	AFLA_075840	5	.	0	AFLA_075840	1	http://amigo.geneontology.org/cgi-bin/amigo/term_details?term=GO:0034109	no
digestive tract development	GO:0048565	0.17864	1	1	AFLA_110340	5	AFLA_110340	1	.	0	http://amigo.geneontology.org/cgi-bin/amigo/term_details?term=GO:0048565	no
fumarate metabolic process	GO:0006106	0.17864	1	1	AFLA_078420	5	.	0	AFLA_078420	1	http://amigo.geneontology.org/cgi-bin/amigo/term_details?term=GO:0006106	no
phosphatidic acid metabolic process	GO:0046473	0.17864	1	1	AFLA_003220	5	AFLA_003220	1	.	0	http://amigo.geneontology.org/cgi-bin/amigo/term_details?term=GO:0046473	no
regulation of muscle system process	GO:0090257	0.17864	1	1	AFLA_038590	5	AFLA_038590	1	.	0	http://amigo.geneontology.org/cgi-bin/amigo/term_details?term=GO:0090257	no
fluid transport	GO:0042044	0.17864	1	1	AFLA_075840	5	.	0	AFLA_075840	1	http://amigo.geneontology.org/cgi-bin/amigo/term_details?term=GO:0042044	no
columnar/cuboidal epithelial cell differentiation	GO:0002065	0.17864	1	1	AFLA_110340	5	AFLA_110340	1	.	0	http://amigo.geneontology.org/cgi-bin/amigo/term_details?term=GO:0002065	no
oxylipin biosynthetic process	GO:0031408	0.17864	1	1	AFLA_044460	5	.	0	AFLA_044460	1	http://amigo.geneontology.org/cgi-bin/amigo/term_details?term=GO:0031408	no
production of molecular mediator involved in inflammatory response	GO:0002532	0.17864	1	1	AFLA_071180	5	.	0	AFLA_071180	1	http://amigo.geneontology.org/cgi-bin/amigo/term_details?term=GO:0002532	no
digestive system development	GO:0055123	0.17864	1	1	AFLA_110340	5	AFLA_110340	1	.	0	http://amigo.geneontology.org/cgi-bin/amigo/term_details?term=GO:0055123	no
regulation of homotypic cell-cell adhesion	GO:0034110	0.17864	1	1	AFLA_075840	5	.	0	AFLA_075840	1	http://amigo.geneontology.org/cgi-bin/amigo/term_details?term=GO:0034110	no
signal release	GO:0023061	0.17864	1	1	AFLA_028740	5	AFLA_028740	1	.	0	http://amigo.geneontology.org/cgi-bin/amigo/term_details?term=GO:0023061	no
positive regulation of homotypic cell-cell adhesion	GO:0034112	0.17864	1	1	AFLA_075840	5	.	0	AFLA_075840	1	http://amigo.geneontology.org/cgi-bin/amigo/term_details?term=GO:0034112	no
cellular response to calcium ion	GO:0071277	0.17864	1	1	AFLA_131330	5	AFLA_131330	1	.	0	http://amigo.geneontology.org/cgi-bin/amigo/term_details?term=GO:0071277	no
positive regulation of locomotion	GO:0040017	0.17864	1	1	AFLA_075840	5	.	0	AFLA_075840	1	http://amigo.geneontology.org/cgi-bin/amigo/term_details?term=GO:0040017	no
queuosine biosynthetic process	GO:0008616	0.17864	1	1	AFLA_093230	5	AFLA_093230	1	.	0	http://amigo.geneontology.org/cgi-bin/amigo/term_details?term=GO:0008616	no
sequestering of calcium ion	GO:0051208	0.17864	1	1	AFLA_038590	5	AFLA_038590	1	.	0	http://amigo.geneontology.org/cgi-bin/amigo/term_details?term=GO:0051208	no
putrescine biosynthetic process	GO:0009446	0.17864	1	1	AFLA_138430	5	.	0	AFLA_138430	1	http://amigo.geneontology.org/cgi-bin/amigo/term_details?term=GO:0009446	no
water transport	GO:0006833	0.17864	1	1	AFLA_075840	5	.	0	AFLA_075840	1	http://amigo.geneontology.org/cgi-bin/amigo/term_details?term=GO:0006833	no
queuosine metabolic process	GO:0046116	0.17864	1	1	AFLA_093230	5	AFLA_093230	1	.	0	http://amigo.geneontology.org/cgi-bin/amigo/term_details?term=GO:0046116	no
asperfuranone metabolic process	GO:1900552	0.17864	1	1	AFLA_110890	5	AFLA_110890	1	.	0	http://amigo.geneontology.org/cgi-bin/amigo/term_details?term=GO:1900552	no
asperfuranone biosynthetic process	GO:1900554	0.17864	1	1	AFLA_110890	5	AFLA_110890	1	.	0	http://amigo.geneontology.org/cgi-bin/amigo/term_details?term=GO:1900554	no
cellular manganese ion homeostasis	GO:0030026	0.17864	1	1	AFLA_050180	5	.	0	AFLA_050180	1	http://amigo.geneontology.org/cgi-bin/amigo/term_details?term=GO:0030026	no
manganese ion homeostasis	GO:0055071	0.17864	1	1	AFLA_050180	5	.	0	AFLA_050180	1	http://amigo.geneontology.org/cgi-bin/amigo/term_details?term=GO:0055071	no
regulation of translation in response to stress	GO:0043555	0.17864	1	1	AFLA_031780	5	.	0	AFLA_031780	1	http://amigo.geneontology.org/cgi-bin/amigo/term_details?term=GO:0043555	no
hypotonic response	GO:0006971	0.17864	1	1	AFLA_075860	5	AFLA_075860	1	.	0	http://amigo.geneontology.org/cgi-bin/amigo/term_details?term=GO:0006971	no
muscle cell development	GO:0055001	0.17864	1	1	AFLA_038590	5	AFLA_038590	1	.	0	http://amigo.geneontology.org/cgi-bin/amigo/term_details?term=GO:0055001	no
regulation of leukocyte activation	GO:0002694	0.17864	1	1	AFLA_071180	5	.	0	AFLA_071180	1	http://amigo.geneontology.org/cgi-bin/amigo/term_details?term=GO:0002694	no
histone phosphorylation	GO:0016572	0.17864	1	1	AFLA_047300	5	.	0	AFLA_047300	1	http://amigo.geneontology.org/cgi-bin/amigo/term_details?term=GO:0016572	no
regulation of cell motility	GO:2000145	0.17864	1	1	AFLA_075840	5	.	0	AFLA_075840	1	http://amigo.geneontology.org/cgi-bin/amigo/term_details?term=GO:2000145	no
regulation of lymphocyte activation	GO:0051249	0.17864	1	1	AFLA_071180	5	.	0	AFLA_071180	1	http://amigo.geneontology.org/cgi-bin/amigo/term_details?term=GO:0051249	no
negative regulation of multicellular organismal process	GO:0051241	0.17864	1	1	AFLA_071180	5	.	0	AFLA_071180	1	http://amigo.geneontology.org/cgi-bin/amigo/term_details?term=GO:0051241	no
catechol-containing compound catabolic process	GO:0019614	0.17864	1	1	AFLA_125090	5	AFLA_125090	1	.	0	http://amigo.geneontology.org/cgi-bin/amigo/term_details?term=GO:0019614	no
extracellular polysaccharide biosynthetic process	GO:0045226	0.17864	1	1	AFLA_075840	5	.	0	AFLA_075840	1	http://amigo.geneontology.org/cgi-bin/amigo/term_details?term=GO:0045226	no
protein lipoylation	GO:0009249	0.17864	1	1	AFLA_067450	5	AFLA_067450	1	.	0	http://amigo.geneontology.org/cgi-bin/amigo/term_details?term=GO:0009249	no
regulation of calcium ion transport into cytosol	GO:0010522	0.17864	1	1	AFLA_038590	5	AFLA_038590	1	.	0	http://amigo.geneontology.org/cgi-bin/amigo/term_details?term=GO:0010522	no
regulation of vacuole fusion, non-autophagic	GO:0032889	0.17864	1	1	AFLA_056120	5	AFLA_056120	1	.	0	http://amigo.geneontology.org/cgi-bin/amigo/term_details?term=GO:0032889	no
deadenylation-dependent decapping of nuclear-transcribed mRNA	GO:0000290	0.17864	1	1	AFLA_093470	5	AFLA_093470	1	.	0	http://amigo.geneontology.org/cgi-bin/amigo/term_details?term=GO:0000290	no
cellular ketone body metabolic process	GO:0046950	0.17864	1	1	AFLA_028740	5	AFLA_028740	1	.	0	http://amigo.geneontology.org/cgi-bin/amigo/term_details?term=GO:0046950	no
regulation of cell migration	GO:0030334	0.17864	1	1	AFLA_075840	5	.	0	AFLA_075840	1	http://amigo.geneontology.org/cgi-bin/amigo/term_details?term=GO:0030334	no
connective tissue development	GO:0061448	0.17864	1	1	AFLA_028740	5	AFLA_028740	1	.	0	http://amigo.geneontology.org/cgi-bin/amigo/term_details?term=GO:0061448	no
regulation of cell-cell adhesion	GO:0022407	0.17864	1	1	AFLA_075840	5	.	0	AFLA_075840	1	http://amigo.geneontology.org/cgi-bin/amigo/term_details?term=GO:0022407	no
positive regulation of cell-cell adhesion	GO:0022409	0.17864	1	1	AFLA_075840	5	.	0	AFLA_075840	1	http://amigo.geneontology.org/cgi-bin/amigo/term_details?term=GO:0022409	no
tertiary alcohol biosynthetic process	GO:1902645	0.17864	1	1	AFLA_110890	5	AFLA_110890	1	.	0	http://amigo.geneontology.org/cgi-bin/amigo/term_details?term=GO:1902645	no
tertiary alcohol metabolic process	GO:1902644	0.17864	1	1	AFLA_110890	5	AFLA_110890	1	.	0	http://amigo.geneontology.org/cgi-bin/amigo/term_details?term=GO:1902644	no
sphingolipid catabolic process	GO:0030149	0.17864	1	1	AFLA_003810	5	AFLA_003810	1	.	0	http://amigo.geneontology.org/cgi-bin/amigo/term_details?term=GO:0030149	no
locomotory behavior	GO:0007626	0.17864	1	1	AFLA_071180	5	.	0	AFLA_071180	1	http://amigo.geneontology.org/cgi-bin/amigo/term_details?term=GO:0007626	no
cytolysis in other organism	GO:0051715	0.17864	1	1	AFLA_003810	5	AFLA_003810	1	.	0	http://amigo.geneontology.org/cgi-bin/amigo/term_details?term=GO:0051715	no
regulation of T cell activation	GO:0050863	0.17864	1	1	AFLA_071180	5	.	0	AFLA_071180	1	http://amigo.geneontology.org/cgi-bin/amigo/term_details?term=GO:0050863	no
regulation of cell activation	GO:0050865	0.17864	1	1	AFLA_071180	5	.	0	AFLA_071180	1	http://amigo.geneontology.org/cgi-bin/amigo/term_details?term=GO:0050865	no
vesicle targeting, to, from or within Golgi	GO:0048199	0.17864	1	1	AFLA_069190	5	AFLA_069190	1	.	0	http://amigo.geneontology.org/cgi-bin/amigo/term_details?term=GO:0048199	no
protein-chromophore linkage	GO:0018298	0.17864	1	1	AFLA_065850	5	AFLA_065850	1	.	0	http://amigo.geneontology.org/cgi-bin/amigo/term_details?term=GO:0018298	no
G-protein coupled receptor signaling pathway	GO:0007186	0.17922	1	2	AFLA_093230|AFLA_050300	20	AFLA_093230|AFLA_050300	2	.	0	http://amigo.geneontology.org/cgi-bin/amigo/term_details?term=GO:0007186	no
negative regulation of programmed cell death	GO:0043069	0.17922	1	2	AFLA_031780|AFLA_071180	20	.	0	AFLA_031780|AFLA_071180	2	http://amigo.geneontology.org/cgi-bin/amigo/term_details?term=GO:0043069	no
vacuole fusion	GO:0097576	0.17922	1	2	AFLA_056120|AFLA_003270	20	AFLA_056120|AFLA_003270	2	.	0	http://amigo.geneontology.org/cgi-bin/amigo/term_details?term=GO:0097576	no
cellular biogenic amine catabolic process	GO:0042402	0.17922	1	2	AFLA_015920|AFLA_071180	20	.	0	AFLA_015920|AFLA_071180	2	http://amigo.geneontology.org/cgi-bin/amigo/term_details?term=GO:0042402	no
dicarboxylic acid biosynthetic process	GO:0043650	0.1796	1	3	AFLA_110930|AFLA_122560|AFLA_066210	38	AFLA_122560	1	AFLA_110930|AFLA_066210	2	http://amigo.geneontology.org/cgi-bin/amigo/term_details?term=GO:0043650	no
maturation of SSU-rRNA	GO:0030490	0.1796	1	3	AFLA_035340|AFLA_044170|AFLA_130100	38	.	0	AFLA_035340|AFLA_044170|AFLA_130100	3	http://amigo.geneontology.org/cgi-bin/amigo/term_details?term=GO:0030490	no
cellular transition metal ion homeostasis	GO:0046916	0.18434	1	4	AFLA_077030|AFLA_126510|AFLA_003980|AFLA_050180	58	.	0	AFLA_077030|AFLA_126510|AFLA_003980|AFLA_050180	4	http://amigo.geneontology.org/cgi-bin/amigo/term_details?term=GO:0046916	no
sterol metabolic process	GO:0016125	0.18827	1	6	AFLA_030250|AFLA_109820|AFLA_119710|AFLA_065130|AFLA_065740|AFLA_138560	100	AFLA_030250|AFLA_119710|AFLA_138560	3	AFLA_109820|AFLA_065130|AFLA_065740	3	http://amigo.geneontology.org/cgi-bin/amigo/term_details?term=GO:0016125	no
cellular biogenic amine metabolic process	GO:0006576	0.18855	1	5	AFLA_079230|AFLA_015920|AFLA_071180|AFLA_003810|AFLA_138430	79	AFLA_003810	1	AFLA_079230|AFLA_015920|AFLA_071180|AFLA_138430	4	http://amigo.geneontology.org/cgi-bin/amigo/term_details?term=GO:0006576	no
ascospore formation	GO:0030437	0.1894	1	3	AFLA_066700|AFLA_003220|AFLA_137060	39	AFLA_003220|AFLA_137060	2	AFLA_066700	1	http://amigo.geneontology.org/cgi-bin/amigo/term_details?term=GO:0030437	no
gluconeogenesis	GO:0006094	0.19333	1	2	AFLA_035030|AFLA_112010	21	AFLA_035030|AFLA_112010	2	.	0	http://amigo.geneontology.org/cgi-bin/amigo/term_details?term=GO:0006094	no
immune system development	GO:0002520	0.19333	1	2	AFLA_071180|AFLA_138560	21	AFLA_138560	1	AFLA_071180	1	http://amigo.geneontology.org/cgi-bin/amigo/term_details?term=GO:0002520	no
negative regulation of cell death	GO:0060548	0.19333	1	2	AFLA_031780|AFLA_071180	21	.	0	AFLA_031780|AFLA_071180	2	http://amigo.geneontology.org/cgi-bin/amigo/term_details?term=GO:0060548	no
cell-cell signaling	GO:0007267	0.19333	1	2	AFLA_028740|AFLA_038590	21	AFLA_028740|AFLA_038590	2	.	0	http://amigo.geneontology.org/cgi-bin/amigo/term_details?term=GO:0007267	no
single organism reproductive process	GO:0044702	0.19643	1	7	AFLA_073340|AFLA_075840|AFLA_019060|AFLA_065130|AFLA_066700|AFLA_003220|AFLA_137060	123	AFLA_073340|AFLA_003220|AFLA_137060	3	AFLA_075840|AFLA_019060|AFLA_065130|AFLA_066700	4	http://amigo.geneontology.org/cgi-bin/amigo/term_details?term=GO:0044702	no
antibiotic biosynthetic process	GO:0017000	0.19934	1	3	AFLA_024750|AFLA_057710|AFLA_070870	40	.	0	AFLA_024750|AFLA_057710|AFLA_070870	3	http://amigo.geneontology.org/cgi-bin/amigo/term_details?term=GO:0017000	no
Golgi to plasma membrane transport	GO:0006893	0.20758	1	2	AFLA_089900|AFLA_045960	22	AFLA_045960	1	AFLA_089900	1	http://amigo.geneontology.org/cgi-bin/amigo/term_details?term=GO:0006893	no
hexose biosynthetic process	GO:0019319	0.20758	1	2	AFLA_035030|AFLA_112010	22	AFLA_035030|AFLA_112010	2	.	0	http://amigo.geneontology.org/cgi-bin/amigo/term_details?term=GO:0019319	no
translational elongation	GO:0006414	0.20758	1	2	AFLA_031780|AFLA_101160	22	.	0	AFLA_031780|AFLA_101160	2	http://amigo.geneontology.org/cgi-bin/amigo/term_details?term=GO:0006414	no
single-organism membrane fusion	GO:0044801	0.20824	1	4	AFLA_056120|AFLA_069190|AFLA_003270|AFLA_137060	61	AFLA_056120|AFLA_069190|AFLA_003270|AFLA_137060	4	.	0	http://amigo.geneontology.org/cgi-bin/amigo/term_details?term=GO:0044801	no
vesicle fusion	GO:0006906	0.2094	1	3	AFLA_056120|AFLA_069190|AFLA_137060	41	AFLA_056120|AFLA_069190|AFLA_137060	3	.	0	http://amigo.geneontology.org/cgi-bin/amigo/term_details?term=GO:0006906	no
cellular response to glucose stimulus	GO:0071333	0.21035	1	1	AFLA_028740	6	AFLA_028740	1	.	0	http://amigo.geneontology.org/cgi-bin/amigo/term_details?term=GO:0071333	no
cellular response to hexose stimulus	GO:0071331	0.21035	1	1	AFLA_028740	6	AFLA_028740	1	.	0	http://amigo.geneontology.org/cgi-bin/amigo/term_details?term=GO:0071331	no
penicillin biosynthetic process	GO:0042318	0.21035	1	1	AFLA_024750	6	.	0	AFLA_024750	1	http://amigo.geneontology.org/cgi-bin/amigo/term_details?term=GO:0042318	no
chronological cell aging	GO:0001300	0.21035	1	1	AFLA_036440	6	.	0	AFLA_036440	1	http://amigo.geneontology.org/cgi-bin/amigo/term_details?term=GO:0001300	no
cellular response to monosaccharide stimulus	GO:0071326	0.21035	1	1	AFLA_028740	6	AFLA_028740	1	.	0	http://amigo.geneontology.org/cgi-bin/amigo/term_details?term=GO:0071326	no
ornithine metabolic process	GO:0006591	0.21035	1	1	AFLA_138430	6	.	0	AFLA_138430	1	http://amigo.geneontology.org/cgi-bin/amigo/term_details?term=GO:0006591	no
regulation of locomotion	GO:0040012	0.21035	1	1	AFLA_075840	6	.	0	AFLA_075840	1	http://amigo.geneontology.org/cgi-bin/amigo/term_details?term=GO:0040012	no
cell killing	GO:0001906	0.21035	1	1	AFLA_003810	6	AFLA_003810	1	.	0	http://amigo.geneontology.org/cgi-bin/amigo/term_details?term=GO:0001906	no
ergot alkaloid biosynthetic process	GO:0035837	0.21035	1	1	AFLA_063420	6	.	0	AFLA_063420	1	http://amigo.geneontology.org/cgi-bin/amigo/term_details?term=GO:0035837	no
glyoxylate cycle	GO:0006097	0.21035	1	1	AFLA_049390	6	.	0	AFLA_049390	1	http://amigo.geneontology.org/cgi-bin/amigo/term_details?term=GO:0006097	no
glycerol catabolic process	GO:0019563	0.21035	1	1	AFLA_093790	6	.	0	AFLA_093790	1	http://amigo.geneontology.org/cgi-bin/amigo/term_details?term=GO:0019563	no
kynurenine metabolic process	GO:0070189	0.21035	1	1	AFLA_071180	6	.	0	AFLA_071180	1	http://amigo.geneontology.org/cgi-bin/amigo/term_details?term=GO:0070189	no
epithelial cell development	GO:0002064	0.21035	1	1	AFLA_110340	6	AFLA_110340	1	.	0	http://amigo.geneontology.org/cgi-bin/amigo/term_details?term=GO:0002064	no
glutamine biosynthetic process	GO:0006542	0.21035	1	1	AFLA_041430	6	.	0	AFLA_041430	1	http://amigo.geneontology.org/cgi-bin/amigo/term_details?term=GO:0006542	no
positive regulation of calcium ion transport	GO:0051928	0.21035	1	1	AFLA_038590	6	AFLA_038590	1	.	0	http://amigo.geneontology.org/cgi-bin/amigo/term_details?term=GO:0051928	no
regulation of system process	GO:0044057	0.21035	1	1	AFLA_038590	6	AFLA_038590	1	.	0	http://amigo.geneontology.org/cgi-bin/amigo/term_details?term=GO:0044057	no
female pregnancy	GO:0007565	0.21035	1	1	AFLA_071180	6	.	0	AFLA_071180	1	http://amigo.geneontology.org/cgi-bin/amigo/term_details?term=GO:0007565	no
muscle system process	GO:0003012	0.21035	1	1	AFLA_038590	6	AFLA_038590	1	.	0	http://amigo.geneontology.org/cgi-bin/amigo/term_details?term=GO:0003012	no
regulation of translational fidelity	GO:0006450	0.21035	1	1	AFLA_101160	6	.	0	AFLA_101160	1	http://amigo.geneontology.org/cgi-bin/amigo/term_details?term=GO:0006450	no
deadenylation-independent decapping of nuclear-transcribed mRNA	GO:0031087	0.21035	1	1	AFLA_093470	6	AFLA_093470	1	.	0	http://amigo.geneontology.org/cgi-bin/amigo/term_details?term=GO:0031087	no
nuclear-transcribed mRNA catabolic process, deadenylation-independent decay	GO:0031086	0.21035	1	1	AFLA_093470	6	AFLA_093470	1	.	0	http://amigo.geneontology.org/cgi-bin/amigo/term_details?term=GO:0031086	no
terpenoid indole alkaloid metabolic process	GO:0046447	0.21035	1	1	AFLA_063420	6	.	0	AFLA_063420	1	http://amigo.geneontology.org/cgi-bin/amigo/term_details?term=GO:0046447	no
lipid translocation	GO:0034204	0.21035	1	1	AFLA_046150	6	AFLA_046150	1	.	0	http://amigo.geneontology.org/cgi-bin/amigo/term_details?term=GO:0034204	no
phospholipid translocation	GO:0045332	0.21035	1	1	AFLA_046150	6	AFLA_046150	1	.	0	http://amigo.geneontology.org/cgi-bin/amigo/term_details?term=GO:0045332	no
T cell activation	GO:0042110	0.21035	1	1	AFLA_071180	6	.	0	AFLA_071180	1	http://amigo.geneontology.org/cgi-bin/amigo/term_details?term=GO:0042110	no
carbon utilization	GO:0015976	0.21035	1	1	AFLA_049390	6	.	0	AFLA_049390	1	http://amigo.geneontology.org/cgi-bin/amigo/term_details?term=GO:0015976	no
single organismal cell-cell adhesion	GO:0016337	0.21035	1	1	AFLA_075840	6	.	0	AFLA_075840	1	http://amigo.geneontology.org/cgi-bin/amigo/term_details?term=GO:0016337	no
flavonoid glucuronidation	GO:0052696	0.21035	1	1	AFLA_065130	6	.	0	AFLA_065130	1	http://amigo.geneontology.org/cgi-bin/amigo/term_details?term=GO:0052696	no
regulation of arginine metabolic process	GO:0000821	0.21035	1	1	AFLA_014490	6	AFLA_014490	1	.	0	http://amigo.geneontology.org/cgi-bin/amigo/term_details?term=GO:0000821	no
multicellular organismal signaling	GO:0035637	0.21035	1	1	AFLA_038590	6	AFLA_038590	1	.	0	http://amigo.geneontology.org/cgi-bin/amigo/term_details?term=GO:0035637	no
positive regulation of cellular component movement	GO:0051272	0.21035	1	1	AFLA_075840	6	.	0	AFLA_075840	1	http://amigo.geneontology.org/cgi-bin/amigo/term_details?term=GO:0051272	no
adenosine metabolic process	GO:0046085	0.21035	1	1	AFLA_134560	6	AFLA_134560	1	.	0	http://amigo.geneontology.org/cgi-bin/amigo/term_details?term=GO:0046085	no
terpenoid indole alkaloid biosynthetic process	GO:0009709	0.21035	1	1	AFLA_063420	6	.	0	AFLA_063420	1	http://amigo.geneontology.org/cgi-bin/amigo/term_details?term=GO:0009709	no
positive regulation of cell development	GO:0010720	0.21035	1	1	AFLA_075840	6	.	0	AFLA_075840	1	http://amigo.geneontology.org/cgi-bin/amigo/term_details?term=GO:0010720	no
beta-lactam antibiotic biosynthetic process	GO:0030654	0.21035	1	1	AFLA_024750	6	.	0	AFLA_024750	1	http://amigo.geneontology.org/cgi-bin/amigo/term_details?term=GO:0030654	no
cellular lactam biosynthetic process	GO:0072339	0.21035	1	1	AFLA_024750	6	.	0	AFLA_024750	1	http://amigo.geneontology.org/cgi-bin/amigo/term_details?term=GO:0072339	no
ribosomal small subunit export from nucleus	GO:0000056	0.21035	1	1	AFLA_098430	6	.	0	AFLA_098430	1	http://amigo.geneontology.org/cgi-bin/amigo/term_details?term=GO:0000056	no
disruption of cells of other organism	GO:0044364	0.21035	1	1	AFLA_003810	6	AFLA_003810	1	.	0	http://amigo.geneontology.org/cgi-bin/amigo/term_details?term=GO:0044364	no
ergot alkaloid metabolic process	GO:0035836	0.21035	1	1	AFLA_063420	6	.	0	AFLA_063420	1	http://amigo.geneontology.org/cgi-bin/amigo/term_details?term=GO:0035836	no
killing of cells of other organism	GO:0031640	0.21035	1	1	AFLA_003810	6	AFLA_003810	1	.	0	http://amigo.geneontology.org/cgi-bin/amigo/term_details?term=GO:0031640	no
membrane depolarization during action potential	GO:0086010	0.21035	1	1	AFLA_068440	6	AFLA_068440	1	.	0	http://amigo.geneontology.org/cgi-bin/amigo/term_details?term=GO:0086010	no
vesicle targeting	GO:0006903	0.21035	1	1	AFLA_069190	6	AFLA_069190	1	.	0	http://amigo.geneontology.org/cgi-bin/amigo/term_details?term=GO:0006903	no
regulation of body fluid levels	GO:0050878	0.21035	1	1	AFLA_075840	6	.	0	AFLA_075840	1	http://amigo.geneontology.org/cgi-bin/amigo/term_details?term=GO:0050878	no
cellular glucuronidation	GO:0052695	0.21035	1	1	AFLA_065130	6	.	0	AFLA_065130	1	http://amigo.geneontology.org/cgi-bin/amigo/term_details?term=GO:0052695	no
secondary alcohol biosynthetic process	GO:1902653	0.21035	1	1	AFLA_110890	6	AFLA_110890	1	.	0	http://amigo.geneontology.org/cgi-bin/amigo/term_details?term=GO:1902653	no
regulation of epithelial cell proliferation	GO:0050678	0.21035	1	1	AFLA_075840	6	.	0	AFLA_075840	1	http://amigo.geneontology.org/cgi-bin/amigo/term_details?term=GO:0050678	no
coenzyme transport	GO:0051182	0.21035	1	1	AFLA_075860	6	AFLA_075860	1	.	0	http://amigo.geneontology.org/cgi-bin/amigo/term_details?term=GO:0051182	no
membrane depolarization	GO:0051899	0.21035	1	1	AFLA_068440	6	AFLA_068440	1	.	0	http://amigo.geneontology.org/cgi-bin/amigo/term_details?term=GO:0051899	no
regulation of response to wounding	GO:1903034	0.21035	1	1	AFLA_071180	6	.	0	AFLA_071180	1	http://amigo.geneontology.org/cgi-bin/amigo/term_details?term=GO:1903034	no
vesicle organization	GO:0016050	0.21641	1	4	AFLA_056120|AFLA_046150|AFLA_069190|AFLA_137060	62	AFLA_056120|AFLA_046150|AFLA_069190|AFLA_137060	4	.	0	http://amigo.geneontology.org/cgi-bin/amigo/term_details?term=GO:0016050	no
antibiotic metabolic process	GO:0016999	0.21958	1	3	AFLA_024750|AFLA_057710|AFLA_070870	42	.	0	AFLA_024750|AFLA_057710|AFLA_070870	3	http://amigo.geneontology.org/cgi-bin/amigo/term_details?term=GO:0016999	no
response to pheromone	GO:0019236	0.22193	1	2	AFLA_003220|AFLA_050300	23	AFLA_003220|AFLA_050300	2	.	0	http://amigo.geneontology.org/cgi-bin/amigo/term_details?term=GO:0019236	no
aminoglycan catabolic process	GO:0006026	0.22193	1	2	AFLA_031380|AFLA_054470	23	AFLA_031380|AFLA_054470	2	.	0	http://amigo.geneontology.org/cgi-bin/amigo/term_details?term=GO:0006026	no
regulation of hormone levels	GO:0010817	0.22193	1	2	AFLA_028740|AFLA_009750	23	AFLA_028740	1	AFLA_009750	1	http://amigo.geneontology.org/cgi-bin/amigo/term_details?term=GO:0010817	no
cellular carbohydrate catabolic process	GO:0044275	0.223	1	5	AFLA_023490|AFLA_063040|AFLA_087870|AFLA_093790|AFLA_044400	84	AFLA_023490|AFLA_087870	2	AFLA_063040|AFLA_093790|AFLA_044400	3	http://amigo.geneontology.org/cgi-bin/amigo/term_details?term=GO:0044275	no
organic hydroxy compound transport	GO:0015850	0.23011	1	5	AFLA_040450|AFLA_043090|AFLA_045770|AFLA_097330|AFLA_138640	85	AFLA_045770	1	AFLA_040450|AFLA_043090|AFLA_097330|AFLA_138640	4	http://amigo.geneontology.org/cgi-bin/amigo/term_details?term=GO:0015850	no
steroid biosynthetic process	GO:0006694	0.23011	1	5	AFLA_030250|AFLA_119710|AFLA_065130|AFLA_065740|AFLA_138560	85	AFLA_030250|AFLA_119710|AFLA_138560	3	AFLA_065130|AFLA_065740	2	http://amigo.geneontology.org/cgi-bin/amigo/term_details?term=GO:0006694	no
mycotoxin biosynthetic process	GO:0043386	0.23298	1	4	AFLA_058760|AFLA_065570|AFLA_002920|AFLA_138050	64	AFLA_065570	1	AFLA_058760|AFLA_002920|AFLA_138050	3	http://amigo.geneontology.org/cgi-bin/amigo/term_details?term=GO:0043386	no
cellular lipid catabolic process	GO:0044242	0.23729	1	5	AFLA_110960|AFLA_073320|AFLA_099270|AFLA_003810|AFLA_049390	86	AFLA_110960|AFLA_073320|AFLA_003810	3	AFLA_099270|AFLA_049390	2	http://amigo.geneontology.org/cgi-bin/amigo/term_details?term=GO:0044242	no
sexual sporulation	GO:0034293	0.2402	1	3	AFLA_066700|AFLA_003220|AFLA_137060	44	AFLA_003220|AFLA_137060	2	AFLA_066700	1	http://amigo.geneontology.org/cgi-bin/amigo/term_details?term=GO:0034293	no
sexual sporulation resulting in formation of a cellular spore	GO:0043935	0.2402	1	3	AFLA_066700|AFLA_003220|AFLA_137060	44	AFLA_003220|AFLA_137060	2	AFLA_066700	1	http://amigo.geneontology.org/cgi-bin/amigo/term_details?term=GO:0043935	no
lipid glycosylation	GO:0030259	0.24085	1	1	AFLA_065130	7	.	0	AFLA_065130	1	http://amigo.geneontology.org/cgi-bin/amigo/term_details?term=GO:0030259	no
regulation of cell morphogenesis involved in differentiation	GO:0010769	0.24085	1	1	AFLA_075840	7	.	0	AFLA_075840	1	http://amigo.geneontology.org/cgi-bin/amigo/term_details?term=GO:0010769	no
regulation of potassium ion transport	GO:0043266	0.24085	1	1	AFLA_038590	7	AFLA_038590	1	.	0	http://amigo.geneontology.org/cgi-bin/amigo/term_details?term=GO:0043266	no
cellular response to tumor necrosis factor	GO:0071356	0.24085	1	1	AFLA_075840	7	.	0	AFLA_075840	1	http://amigo.geneontology.org/cgi-bin/amigo/term_details?term=GO:0071356	no
regulation of potassium ion transmembrane transporter activity	GO:1901016	0.24085	1	1	AFLA_038590	7	AFLA_038590	1	.	0	http://amigo.geneontology.org/cgi-bin/amigo/term_details?term=GO:1901016	no
prostaglandin biosynthetic process	GO:0001516	0.24085	1	1	AFLA_030430	7	.	0	AFLA_030430	1	http://amigo.geneontology.org/cgi-bin/amigo/term_details?term=GO:0001516	no
response to tumor necrosis factor	GO:0034612	0.24085	1	1	AFLA_075840	7	.	0	AFLA_075840	1	http://amigo.geneontology.org/cgi-bin/amigo/term_details?term=GO:0034612	no
rhythmic process	GO:0048511	0.24085	1	1	AFLA_075840	7	.	0	AFLA_075840	1	http://amigo.geneontology.org/cgi-bin/amigo/term_details?term=GO:0048511	no
cellular modified amino acid catabolic process	GO:0042219	0.24085	1	1	AFLA_035970	7	AFLA_035970	1	.	0	http://amigo.geneontology.org/cgi-bin/amigo/term_details?term=GO:0042219	no
response to calcium ion	GO:0051592	0.24085	1	1	AFLA_131330	7	AFLA_131330	1	.	0	http://amigo.geneontology.org/cgi-bin/amigo/term_details?term=GO:0051592	no
regulation of membrane lipid distribution	GO:0097035	0.24085	1	1	AFLA_046150	7	AFLA_046150	1	.	0	http://amigo.geneontology.org/cgi-bin/amigo/term_details?term=GO:0097035	no
prostanoid biosynthetic process	GO:0046457	0.24085	1	1	AFLA_030430	7	.	0	AFLA_030430	1	http://amigo.geneontology.org/cgi-bin/amigo/term_details?term=GO:0046457	no
endocytic recycling	GO:0032456	0.24085	1	1	AFLA_046150	7	AFLA_046150	1	.	0	http://amigo.geneontology.org/cgi-bin/amigo/term_details?term=GO:0032456	no
positive regulation of cation channel activity	GO:2001259	0.24085	1	1	AFLA_038590	7	AFLA_038590	1	.	0	http://amigo.geneontology.org/cgi-bin/amigo/term_details?term=GO:2001259	no
regulation of cation channel activity	GO:2001257	0.24085	1	1	AFLA_038590	7	AFLA_038590	1	.	0	http://amigo.geneontology.org/cgi-bin/amigo/term_details?term=GO:2001257	no
cinnamic acid metabolic process	GO:0009803	0.24085	1	1	AFLA_060700	7	.	0	AFLA_060700	1	http://amigo.geneontology.org/cgi-bin/amigo/term_details?term=GO:0009803	no
glucuronate metabolic process	GO:0019585	0.24085	1	1	AFLA_065130	7	.	0	AFLA_065130	1	http://amigo.geneontology.org/cgi-bin/amigo/term_details?term=GO:0019585	no
pheromone-dependent signal transduction involved in conjugation with cellular fusion	GO:0000750	0.24085	1	1	AFLA_050300	7	AFLA_050300	1	.	0	http://amigo.geneontology.org/cgi-bin/amigo/term_details?term=GO:0000750	no
regulation of potassium ion transmembrane transport	GO:1901379	0.24085	1	1	AFLA_038590	7	AFLA_038590	1	.	0	http://amigo.geneontology.org/cgi-bin/amigo/term_details?term=GO:1901379	no
root development	GO:0048364	0.24085	1	1	AFLA_009750	7	.	0	AFLA_009750	1	http://amigo.geneontology.org/cgi-bin/amigo/term_details?term=GO:0048364	no
cardiac muscle cell action potential	GO:0086001	0.24085	1	1	AFLA_038590	7	AFLA_038590	1	.	0	http://amigo.geneontology.org/cgi-bin/amigo/term_details?term=GO:0086001	no
lignin catabolic process	GO:0046274	0.24085	1	1	AFLA_120890	7	AFLA_120890	1	.	0	http://amigo.geneontology.org/cgi-bin/amigo/term_details?term=GO:0046274	no
peptidoglycan-based cell wall biogenesis	GO:0009273	0.24085	1	1	AFLA_123350	7	.	0	AFLA_123350	1	http://amigo.geneontology.org/cgi-bin/amigo/term_details?term=GO:0009273	no
actin filament depolymerization	GO:0030042	0.24085	1	1	AFLA_089900	7	.	0	AFLA_089900	1	http://amigo.geneontology.org/cgi-bin/amigo/term_details?term=GO:0030042	no
interstrand cross-link repair	GO:0036297	0.24085	1	1	AFLA_017580	7	AFLA_017580	1	.	0	http://amigo.geneontology.org/cgi-bin/amigo/term_details?term=GO:0036297	no
peptidoglycan biosynthetic process	GO:0009252	0.24085	1	1	AFLA_123350	7	.	0	AFLA_123350	1	http://amigo.geneontology.org/cgi-bin/amigo/term_details?term=GO:0009252	no
regulation of cardiac muscle cell action potential	GO:0098901	0.24085	1	1	AFLA_038590	7	AFLA_038590	1	.	0	http://amigo.geneontology.org/cgi-bin/amigo/term_details?term=GO:0098901	no
regulation of action potential	GO:0098900	0.24085	1	1	AFLA_038590	7	AFLA_038590	1	.	0	http://amigo.geneontology.org/cgi-bin/amigo/term_details?term=GO:0098900	no
positive regulation of cytokine production	GO:0001819	0.24085	1	1	AFLA_071180	7	.	0	AFLA_071180	1	http://amigo.geneontology.org/cgi-bin/amigo/term_details?term=GO:0001819	no
root system development	GO:0022622	0.24085	1	1	AFLA_009750	7	.	0	AFLA_009750	1	http://amigo.geneontology.org/cgi-bin/amigo/term_details?term=GO:0022622	no
putrescine metabolic process	GO:0009445	0.24085	1	1	AFLA_138430	7	.	0	AFLA_138430	1	http://amigo.geneontology.org/cgi-bin/amigo/term_details?term=GO:0009445	no
stem cell development	GO:0048864	0.24085	1	1	AFLA_075840	7	.	0	AFLA_075840	1	http://amigo.geneontology.org/cgi-bin/amigo/term_details?term=GO:0048864	no
positive regulation of ion transmembrane transporter activity	GO:0032414	0.24085	1	1	AFLA_038590	7	AFLA_038590	1	.	0	http://amigo.geneontology.org/cgi-bin/amigo/term_details?term=GO:0032414	no
positive regulation of transporter activity	GO:0032411	0.24085	1	1	AFLA_038590	7	AFLA_038590	1	.	0	http://amigo.geneontology.org/cgi-bin/amigo/term_details?term=GO:0032411	no
regulation of vacuole organization	GO:0044088	0.24085	1	1	AFLA_056120	7	AFLA_056120	1	.	0	http://amigo.geneontology.org/cgi-bin/amigo/term_details?term=GO:0044088	no
water homeostasis	GO:0030104	0.24085	1	1	AFLA_075840	7	.	0	AFLA_075840	1	http://amigo.geneontology.org/cgi-bin/amigo/term_details?term=GO:0030104	no
indole alkaloid metabolic process	GO:0035834	0.24085	1	1	AFLA_063420	7	.	0	AFLA_063420	1	http://amigo.geneontology.org/cgi-bin/amigo/term_details?term=GO:0035834	no
indole alkaloid biosynthetic process	GO:0035835	0.24085	1	1	AFLA_063420	7	.	0	AFLA_063420	1	http://amigo.geneontology.org/cgi-bin/amigo/term_details?term=GO:0035835	no
spore germination	GO:0009847	0.24085	1	1	AFLA_131330	7	AFLA_131330	1	.	0	http://amigo.geneontology.org/cgi-bin/amigo/term_details?term=GO:0009847	no
secondary alcohol metabolic process	GO:1902652	0.24085	1	1	AFLA_110890	7	AFLA_110890	1	.	0	http://amigo.geneontology.org/cgi-bin/amigo/term_details?term=GO:1902652	no
epithelial cell proliferation	GO:0050673	0.24085	1	1	AFLA_075840	7	.	0	AFLA_075840	1	http://amigo.geneontology.org/cgi-bin/amigo/term_details?term=GO:0050673	no
glucose import	GO:0046323	0.24138	1	4	AFLA_080990|AFLA_043090|AFLA_097330|AFLA_131830	65	.	0	AFLA_080990|AFLA_043090|AFLA_097330|AFLA_131830	4	http://amigo.geneontology.org/cgi-bin/amigo/term_details?term=GO:0046323	no
mycotoxin metabolic process	GO:0043385	0.24138	1	4	AFLA_058760|AFLA_065570|AFLA_002920|AFLA_138050	65	AFLA_065570	1	AFLA_058760|AFLA_002920|AFLA_138050	3	http://amigo.geneontology.org/cgi-bin/amigo/term_details?term=GO:0043385	no
endosomal transport	GO:0016197	0.24138	1	4	AFLA_052640|AFLA_095670|AFLA_046150|AFLA_047300	65	AFLA_052640|AFLA_046150	2	AFLA_095670|AFLA_047300	2	http://amigo.geneontology.org/cgi-bin/amigo/term_details?term=GO:0016197	no
membrane fusion	GO:0061025	0.24138	1	4	AFLA_056120|AFLA_069190|AFLA_003270|AFLA_137060	65	AFLA_056120|AFLA_069190|AFLA_003270|AFLA_137060	4	.	0	http://amigo.geneontology.org/cgi-bin/amigo/term_details?term=GO:0061025	no
cellular developmental process	GO:0048869	0.24417	1	14	AFLA_023600|AFLA_110340|AFLA_073340|AFLA_075840|AFLA_082850|AFLA_083110|AFLA_123350|AFLA_128330|AFLA_038590|AFLA_044790|AFLA_066700|AFLA_003220|AFLA_131330|AFLA_137060	294	AFLA_023600|AFLA_110340|AFLA_073340|AFLA_083110|AFLA_128330|AFLA_038590|AFLA_044790|AFLA_003220|AFLA_131330|AFLA_137060	10	AFLA_075840|AFLA_082850|AFLA_123350|AFLA_066700	4	http://amigo.geneontology.org/cgi-bin/amigo/term_details?term=GO:0048869	no
regulation of localization	GO:0032879	0.24731	1	7	AFLA_028740|AFLA_056120|AFLA_075840|AFLA_038590|AFLA_098430|AFLA_069190|AFLA_003980	132	AFLA_028740|AFLA_056120|AFLA_038590|AFLA_069190	4	AFLA_075840|AFLA_098430|AFLA_003980	3	http://amigo.geneontology.org/cgi-bin/amigo/term_details?term=GO:0032879	no
glucose transport	GO:0015758	0.24985	1	4	AFLA_080990|AFLA_043090|AFLA_097330|AFLA_131830	66	.	0	AFLA_080990|AFLA_043090|AFLA_097330|AFLA_131830	4	http://amigo.geneontology.org/cgi-bin/amigo/term_details?term=GO:0015758	no
regulation of multicellular organismal process	GO:0051239	0.24985	1	4	AFLA_075840|AFLA_038590|AFLA_099280|AFLA_071180	66	AFLA_038590	1	AFLA_075840|AFLA_099280|AFLA_071180	3	http://amigo.geneontology.org/cgi-bin/amigo/term_details?term=GO:0051239	no
glycolytic process	GO:0006096	0.25084	1	2	AFLA_042390|AFLA_101470	25	AFLA_042390|AFLA_101470	2	.	0	http://amigo.geneontology.org/cgi-bin/amigo/term_details?term=GO:0006096	no
alditol metabolic process	GO:0019400	0.25084	1	2	AFLA_122210|AFLA_093790	25	.	0	AFLA_122210|AFLA_093790	2	http://amigo.geneontology.org/cgi-bin/amigo/term_details?term=GO:0019400	no
glycerol transport	GO:0015793	0.25084	1	2	AFLA_043090|AFLA_097330	25	.	0	AFLA_043090|AFLA_097330	2	http://amigo.geneontology.org/cgi-bin/amigo/term_details?term=GO:0015793	no
cation transport	GO:0006812	0.25109	1	11	AFLA_110050|AFLA_126510|AFLA_018740|AFLA_038590|AFLA_040450|AFLA_129430|AFLA_045770|AFLA_068440|AFLA_003980|AFLA_050180|AFLA_138640	225	AFLA_038590|AFLA_129430|AFLA_045770|AFLA_068440	4	AFLA_110050|AFLA_126510|AFLA_018740|AFLA_040450|AFLA_003980|AFLA_050180|AFLA_138640	7	http://amigo.geneontology.org/cgi-bin/amigo/term_details?term=GO:0006812	no
organelle assembly	GO:0070925	0.25183	1	5	AFLA_034340|AFLA_112090|AFLA_079160|AFLA_080140|AFLA_044170	88	.	0	AFLA_034340|AFLA_112090|AFLA_079160|AFLA_080140|AFLA_044170	5	http://amigo.geneontology.org/cgi-bin/amigo/term_details?term=GO:0070925	no
cellular homeostasis	GO:0019725	0.25383	1	9	AFLA_028740|AFLA_032000|AFLA_077030|AFLA_126510|AFLA_038590|AFLA_129430|AFLA_068440|AFLA_003980|AFLA_050180	179	AFLA_028740|AFLA_032000|AFLA_038590|AFLA_129430|AFLA_068440	5	AFLA_077030|AFLA_126510|AFLA_003980|AFLA_050180	4	http://amigo.geneontology.org/cgi-bin/amigo/term_details?term=GO:0019725	no
anatomical structure morphogenesis	GO:0009653	0.2549	1	13	AFLA_023600|AFLA_110340|AFLA_075840|AFLA_082850|AFLA_083110|AFLA_123350|AFLA_128330|AFLA_019060|AFLA_044790|AFLA_066700|AFLA_003220|AFLA_131330|AFLA_137060	273	AFLA_023600|AFLA_110340|AFLA_083110|AFLA_128330|AFLA_044790|AFLA_003220|AFLA_131330|AFLA_137060	8	AFLA_075840|AFLA_082850|AFLA_123350|AFLA_019060|AFLA_066700	5	http://amigo.geneontology.org/cgi-bin/amigo/term_details?term=GO:0009653	no
steroid metabolic process	GO:0008202	0.25694	1	6	AFLA_030250|AFLA_109820|AFLA_119710|AFLA_065130|AFLA_065740|AFLA_138560	111	AFLA_030250|AFLA_119710|AFLA_138560	3	AFLA_109820|AFLA_065130|AFLA_065740	3	http://amigo.geneontology.org/cgi-bin/amigo/term_details?term=GO:0008202	no
single-organism carbohydrate catabolic process	GO:0044724	0.25694	1	6	AFLA_125700|AFLA_093790|AFLA_041410|AFLA_042390|AFLA_044400|AFLA_101470	111	AFLA_042390|AFLA_101470	2	AFLA_125700|AFLA_093790|AFLA_041410|AFLA_044400	4	http://amigo.geneontology.org/cgi-bin/amigo/term_details?term=GO:0044724	no
organelle fusion	GO:0048284	0.25839	1	4	AFLA_056120|AFLA_069190|AFLA_003270|AFLA_137060	67	AFLA_056120|AFLA_069190|AFLA_003270|AFLA_137060	4	.	0	http://amigo.geneontology.org/cgi-bin/amigo/term_details?term=GO:0048284	no
monosaccharide transport	GO:0015749	0.25839	1	4	AFLA_080990|AFLA_043090|AFLA_097330|AFLA_131830	67	.	0	AFLA_080990|AFLA_043090|AFLA_097330|AFLA_131830	4	http://amigo.geneontology.org/cgi-bin/amigo/term_details?term=GO:0015749	no
hexose transport	GO:0008645	0.25839	1	4	AFLA_080990|AFLA_043090|AFLA_097330|AFLA_131830	67	.	0	AFLA_080990|AFLA_043090|AFLA_097330|AFLA_131830	4	http://amigo.geneontology.org/cgi-bin/amigo/term_details?term=GO:0008645	no
tissue development	GO:0009888	0.26114	1	3	AFLA_028740|AFLA_110340|AFLA_075840	46	AFLA_028740|AFLA_110340	2	AFLA_075840	1	http://amigo.geneontology.org/cgi-bin/amigo/term_details?term=GO:0009888	no
tryptophan metabolic process	GO:0006568	0.26534	1	2	AFLA_015920|AFLA_071180	26	.	0	AFLA_015920|AFLA_071180	2	http://amigo.geneontology.org/cgi-bin/amigo/term_details?term=GO:0006568	no
indolalkylamine metabolic process	GO:0006586	0.26534	1	2	AFLA_015920|AFLA_071180	26	.	0	AFLA_015920|AFLA_071180	2	http://amigo.geneontology.org/cgi-bin/amigo/term_details?term=GO:0006586	no
polyol transport	GO:0015791	0.26534	1	2	AFLA_043090|AFLA_097330	26	.	0	AFLA_043090|AFLA_097330	2	http://amigo.geneontology.org/cgi-bin/amigo/term_details?term=GO:0015791	no
carbohydrate biosynthetic process	GO:0016051	0.26658	1	5	AFLA_035030|AFLA_112010|AFLA_075840|AFLA_122210|AFLA_044400	90	AFLA_035030|AFLA_112010	2	AFLA_075840|AFLA_122210|AFLA_044400	3	http://amigo.geneontology.org/cgi-bin/amigo/term_details?term=GO:0016051	no
sorocarp morphogenesis	GO:0031288	0.27017	1	1	AFLA_019060	8	.	0	AFLA_019060	1	http://amigo.geneontology.org/cgi-bin/amigo/term_details?term=GO:0031288	no
penicillin metabolic process	GO:0042316	0.27017	1	1	AFLA_024750	8	.	0	AFLA_024750	1	http://amigo.geneontology.org/cgi-bin/amigo/term_details?term=GO:0042316	no
cellular response to carbohydrate stimulus	GO:0071322	0.27017	1	1	AFLA_028740	8	AFLA_028740	1	.	0	http://amigo.geneontology.org/cgi-bin/amigo/term_details?term=GO:0071322	no
fatty acid derivative biosynthetic process	GO:1901570	0.27017	1	1	AFLA_030430	8	.	0	AFLA_030430	1	http://amigo.geneontology.org/cgi-bin/amigo/term_details?term=GO:1901570	no
tetrahydrofolate interconversion	GO:0035999	0.27017	1	1	AFLA_047080	8	AFLA_047080	1	.	0	http://amigo.geneontology.org/cgi-bin/amigo/term_details?term=GO:0035999	no
acetyl-CoA biosynthetic process	GO:0006085	0.27017	1	1	AFLA_106350	8	AFLA_106350	1	.	0	http://amigo.geneontology.org/cgi-bin/amigo/term_details?term=GO:0006085	no
positive regulation of apoptotic process	GO:0043065	0.27017	1	1	AFLA_071180	8	.	0	AFLA_071180	1	http://amigo.geneontology.org/cgi-bin/amigo/term_details?term=GO:0043065	no
regulation of calcium ion transport	GO:0051924	0.27017	1	1	AFLA_038590	8	AFLA_038590	1	.	0	http://amigo.geneontology.org/cgi-bin/amigo/term_details?term=GO:0051924	no
ketone catabolic process	GO:0042182	0.27017	1	1	AFLA_028740	8	AFLA_028740	1	.	0	http://amigo.geneontology.org/cgi-bin/amigo/term_details?term=GO:0042182	no
chaperone-mediated protein complex assembly	GO:0051131	0.27017	1	1	AFLA_005180	8	.	0	AFLA_005180	1	http://amigo.geneontology.org/cgi-bin/amigo/term_details?term=GO:0051131	no
angiogenesis	GO:0001525	0.27017	1	1	AFLA_110340	8	AFLA_110340	1	.	0	http://amigo.geneontology.org/cgi-bin/amigo/term_details?term=GO:0001525	no
phospholipid transport	GO:0015914	0.27017	1	1	AFLA_046150	8	AFLA_046150	1	.	0	http://amigo.geneontology.org/cgi-bin/amigo/term_details?term=GO:0015914	no
alkaloid biosynthetic process	GO:0009821	0.27017	1	1	AFLA_063420	8	.	0	AFLA_063420	1	http://amigo.geneontology.org/cgi-bin/amigo/term_details?term=GO:0009821	no
icosanoid biosynthetic process	GO:0046456	0.27017	1	1	AFLA_030430	8	.	0	AFLA_030430	1	http://amigo.geneontology.org/cgi-bin/amigo/term_details?term=GO:0046456	no
chromosome condensation	GO:0030261	0.27017	1	1	AFLA_047300	8	.	0	AFLA_047300	1	http://amigo.geneontology.org/cgi-bin/amigo/term_details?term=GO:0030261	no
mitochondrial respiratory chain complex III assembly	GO:0034551	0.27017	1	1	AFLA_005180	8	.	0	AFLA_005180	1	http://amigo.geneontology.org/cgi-bin/amigo/term_details?term=GO:0034551	no
positive regulation of defense response	GO:0031349	0.27017	1	1	AFLA_071180	8	.	0	AFLA_071180	1	http://amigo.geneontology.org/cgi-bin/amigo/term_details?term=GO:0031349	no
response to water	GO:0009415	0.27017	1	1	AFLA_009750	8	.	0	AFLA_009750	1	http://amigo.geneontology.org/cgi-bin/amigo/term_details?term=GO:0009415	no
response to water deprivation	GO:0009414	0.27017	1	1	AFLA_009750	8	.	0	AFLA_009750	1	http://amigo.geneontology.org/cgi-bin/amigo/term_details?term=GO:0009414	no
beta-lactam antibiotic metabolic process	GO:0030653	0.27017	1	1	AFLA_024750	8	.	0	AFLA_024750	1	http://amigo.geneontology.org/cgi-bin/amigo/term_details?term=GO:0030653	no
cellular lactam metabolic process	GO:0072338	0.27017	1	1	AFLA_024750	8	.	0	AFLA_024750	1	http://amigo.geneontology.org/cgi-bin/amigo/term_details?term=GO:0072338	no
diol biosynthetic process	GO:0034312	0.27017	1	1	AFLA_110890	8	AFLA_110890	1	.	0	http://amigo.geneontology.org/cgi-bin/amigo/term_details?term=GO:0034312	no
positive regulation of immune response	GO:0050778	0.27017	1	1	AFLA_071180	8	.	0	AFLA_071180	1	http://amigo.geneontology.org/cgi-bin/amigo/term_details?term=GO:0050778	no
single organism cell adhesion	GO:0098602	0.27017	1	1	AFLA_075840	8	.	0	AFLA_075840	1	http://amigo.geneontology.org/cgi-bin/amigo/term_details?term=GO:0098602	no
respiratory chain complex III assembly	GO:0017062	0.27017	1	1	AFLA_005180	8	.	0	AFLA_005180	1	http://amigo.geneontology.org/cgi-bin/amigo/term_details?term=GO:0017062	no
homeostatic process	GO:0042592	0.27158	1	13	AFLA_028740|AFLA_031780|AFLA_032000|AFLA_075840|AFLA_075860|AFLA_077030|AFLA_126510|AFLA_038590|AFLA_129430|AFLA_099270|AFLA_068440|AFLA_003980|AFLA_050180	277	AFLA_028740|AFLA_032000|AFLA_075860|AFLA_038590|AFLA_129430|AFLA_068440	6	AFLA_031780|AFLA_075840|AFLA_077030|AFLA_126510|AFLA_099270|AFLA_003980|AFLA_050180	7	http://amigo.geneontology.org/cgi-bin/amigo/term_details?term=GO:0042592	no
ethanolamine transport	GO:0034229	0.27985	1	2	AFLA_040450|AFLA_138640	27	.	0	AFLA_040450|AFLA_138640	2	http://amigo.geneontology.org/cgi-bin/amigo/term_details?term=GO:0034229	no
glycine betaine transport	GO:0031460	0.27985	1	2	AFLA_040450|AFLA_138640	27	.	0	AFLA_040450|AFLA_138640	2	http://amigo.geneontology.org/cgi-bin/amigo/term_details?term=GO:0031460	no
choline transport	GO:0015871	0.27985	1	2	AFLA_040450|AFLA_138640	27	.	0	AFLA_040450|AFLA_138640	2	http://amigo.geneontology.org/cgi-bin/amigo/term_details?term=GO:0015871	no
primary alcohol metabolic process	GO:0034308	0.27985	1	2	AFLA_063160|AFLA_017590	27	AFLA_017590	1	AFLA_063160	1	http://amigo.geneontology.org/cgi-bin/amigo/term_details?term=GO:0034308	no
cellular ketone metabolic process	GO:0042180	0.28152	1	5	AFLA_028740|AFLA_110890|AFLA_014490|AFLA_103000|AFLA_071180	92	AFLA_028740|AFLA_110890|AFLA_014490|AFLA_103000	4	AFLA_071180	1	http://amigo.geneontology.org/cgi-bin/amigo/term_details?term=GO:0042180	no
fungal-type cell wall biogenesis	GO:0009272	0.2823	1	3	AFLA_011230|AFLA_075860|AFLA_066700	48	AFLA_011230|AFLA_075860	2	AFLA_066700	1	http://amigo.geneontology.org/cgi-bin/amigo/term_details?term=GO:0009272	no
glutamine metabolic process	GO:0006541	0.29433	1	2	AFLA_041420|AFLA_041430	28	.	0	AFLA_041420|AFLA_041430	2	http://amigo.geneontology.org/cgi-bin/amigo/term_details?term=GO:0006541	no
amine catabolic process	GO:0009310	0.29433	1	2	AFLA_015920|AFLA_071180	28	.	0	AFLA_015920|AFLA_071180	2	http://amigo.geneontology.org/cgi-bin/amigo/term_details?term=GO:0009310	no
regulation of cell proliferation	GO:0042127	0.29433	1	2	AFLA_075840|AFLA_071180	28	.	0	AFLA_075840|AFLA_071180	2	http://amigo.geneontology.org/cgi-bin/amigo/term_details?term=GO:0042127	no
fatty acid metabolic process	GO:0006631	0.29552	1	9	AFLA_030430|AFLA_106350|AFLA_107840|AFLA_108930|AFLA_073320|AFLA_044460|AFLA_099270|AFLA_066620|AFLA_049390	187	AFLA_106350|AFLA_108930|AFLA_073320|AFLA_066620	4	AFLA_030430|AFLA_107840|AFLA_044460|AFLA_099270|AFLA_049390	5	http://amigo.geneontology.org/cgi-bin/amigo/term_details?term=GO:0006631	no
polyamine biosynthetic process	GO:0006596	0.29837	1	1	AFLA_138430	9	.	0	AFLA_138430	1	http://amigo.geneontology.org/cgi-bin/amigo/term_details?term=GO:0006596	no
pyrimidine nucleotide salvage	GO:0032262	0.29837	1	1	AFLA_001850	9	AFLA_001850	1	.	0	http://amigo.geneontology.org/cgi-bin/amigo/term_details?term=GO:0032262	no
response to zinc ion	GO:0010043	0.29837	1	1	AFLA_003980	9	.	0	AFLA_003980	1	http://amigo.geneontology.org/cgi-bin/amigo/term_details?term=GO:0010043	no
positive regulation of programmed cell death	GO:0043068	0.29837	1	1	AFLA_071180	9	.	0	AFLA_071180	1	http://amigo.geneontology.org/cgi-bin/amigo/term_details?term=GO:0043068	no
jasmonic acid biosynthetic process	GO:0009695	0.29837	1	1	AFLA_044460	9	.	0	AFLA_044460	1	http://amigo.geneontology.org/cgi-bin/amigo/term_details?term=GO:0009695	no
jasmonic acid metabolic process	GO:0009694	0.29837	1	1	AFLA_044460	9	.	0	AFLA_044460	1	http://amigo.geneontology.org/cgi-bin/amigo/term_details?term=GO:0009694	no
UMP salvage	GO:0044206	0.29837	1	1	AFLA_001850	9	AFLA_001850	1	.	0	http://amigo.geneontology.org/cgi-bin/amigo/term_details?term=GO:0044206	no
muscle cell differentiation	GO:0042692	0.29837	1	1	AFLA_038590	9	AFLA_038590	1	.	0	http://amigo.geneontology.org/cgi-bin/amigo/term_details?term=GO:0042692	no
regulation of transmembrane transporter activity	GO:0022898	0.29837	1	1	AFLA_038590	9	AFLA_038590	1	.	0	http://amigo.geneontology.org/cgi-bin/amigo/term_details?term=GO:0022898	no
response to ethanol	GO:0045471	0.29837	1	1	AFLA_028740	9	AFLA_028740	1	.	0	http://amigo.geneontology.org/cgi-bin/amigo/term_details?term=GO:0045471	no
sequestering of zinc ion	GO:0032119	0.29837	1	1	AFLA_003980	9	.	0	AFLA_003980	1	http://amigo.geneontology.org/cgi-bin/amigo/term_details?term=GO:0032119	no
sensory perception	GO:0007600	0.29837	1	1	AFLA_093230	9	AFLA_093230	1	.	0	http://amigo.geneontology.org/cgi-bin/amigo/term_details?term=GO:0007600	no
regulation of sequestering of zinc ion	GO:0061088	0.29837	1	1	AFLA_003980	9	.	0	AFLA_003980	1	http://amigo.geneontology.org/cgi-bin/amigo/term_details?term=GO:0061088	no
response to monosaccharide	GO:0034284	0.29837	1	1	AFLA_028740	9	AFLA_028740	1	.	0	http://amigo.geneontology.org/cgi-bin/amigo/term_details?term=GO:0034284	no
response to hexose	GO:0009746	0.29837	1	1	AFLA_028740	9	AFLA_028740	1	.	0	http://amigo.geneontology.org/cgi-bin/amigo/term_details?term=GO:0009746	no
response to glucose	GO:0009749	0.29837	1	1	AFLA_028740	9	AFLA_028740	1	.	0	http://amigo.geneontology.org/cgi-bin/amigo/term_details?term=GO:0009749	no
primary alcohol catabolic process	GO:0034310	0.29837	1	1	AFLA_063160	9	.	0	AFLA_063160	1	http://amigo.geneontology.org/cgi-bin/amigo/term_details?term=GO:0034310	no
diol metabolic process	GO:0034311	0.29837	1	1	AFLA_110890	9	AFLA_110890	1	.	0	http://amigo.geneontology.org/cgi-bin/amigo/term_details?term=GO:0034311	no
stem cell differentiation	GO:0048863	0.29837	1	1	AFLA_075840	9	.	0	AFLA_075840	1	http://amigo.geneontology.org/cgi-bin/amigo/term_details?term=GO:0048863	no
culmination involved in sorocarp development	GO:0031154	0.29837	1	1	AFLA_019060	9	.	0	AFLA_019060	1	http://amigo.geneontology.org/cgi-bin/amigo/term_details?term=GO:0031154	no
positive regulation of carbohydrate metabolic process	GO:0045913	0.29837	1	1	AFLA_075840	9	.	0	AFLA_075840	1	http://amigo.geneontology.org/cgi-bin/amigo/term_details?term=GO:0045913	no
regulation of ion transmembrane transporter activity	GO:0032412	0.29837	1	1	AFLA_038590	9	AFLA_038590	1	.	0	http://amigo.geneontology.org/cgi-bin/amigo/term_details?term=GO:0032412	no
modification of morphology or physiology of other organism	GO:0035821	0.29837	1	1	AFLA_003810	9	AFLA_003810	1	.	0	http://amigo.geneontology.org/cgi-bin/amigo/term_details?term=GO:0035821	no
regulation of polysaccharide biosynthetic process	GO:0032885	0.29837	1	1	AFLA_075840	9	.	0	AFLA_075840	1	http://amigo.geneontology.org/cgi-bin/amigo/term_details?term=GO:0032885	no
regulation of transporter activity	GO:0032409	0.29837	1	1	AFLA_038590	9	AFLA_038590	1	.	0	http://amigo.geneontology.org/cgi-bin/amigo/term_details?term=GO:0032409	no
positive regulation of secretion	GO:0051047	0.29837	1	1	AFLA_028740	9	AFLA_028740	1	.	0	http://amigo.geneontology.org/cgi-bin/amigo/term_details?term=GO:0051047	no
regulation of translational elongation	GO:0006448	0.29837	1	1	AFLA_101160	9	.	0	AFLA_101160	1	http://amigo.geneontology.org/cgi-bin/amigo/term_details?term=GO:0006448	no
cellular response to amino acid starvation	GO:0034198	0.29837	1	1	AFLA_034340	9	.	0	AFLA_034340	1	http://amigo.geneontology.org/cgi-bin/amigo/term_details?term=GO:0034198	no
pyrimidine ribonucleotide salvage	GO:0010138	0.29837	1	1	AFLA_001850	9	AFLA_001850	1	.	0	http://amigo.geneontology.org/cgi-bin/amigo/term_details?term=GO:0010138	no
single-organism membrane organization	GO:0044802	0.29889	1	8	AFLA_052640|AFLA_056120|AFLA_089900|AFLA_038590|AFLA_046150|AFLA_069190|AFLA_003270|AFLA_137060	164	AFLA_052640|AFLA_056120|AFLA_038590|AFLA_046150|AFLA_069190|AFLA_003270|AFLA_137060	7	AFLA_089900	1	http://amigo.geneontology.org/cgi-bin/amigo/term_details?term=GO:0044802	no
secretion by cell	GO:0032940	0.30361	1	3	AFLA_028740|AFLA_003220|AFLA_137060	50	AFLA_028740|AFLA_003220|AFLA_137060	3	.	0	http://amigo.geneontology.org/cgi-bin/amigo/term_details?term=GO:0032940	no
positive regulation of catalytic activity	GO:0043085	0.30361	1	3	AFLA_034340|AFLA_018500|AFLA_102850	50	AFLA_018500|AFLA_102850	2	AFLA_034340	1	http://amigo.geneontology.org/cgi-bin/amigo/term_details?term=GO:0043085	no
alkaloid metabolic process	GO:0009820	0.30877	1	2	AFLA_060680|AFLA_063420	29	.	0	AFLA_060680|AFLA_063420	2	http://amigo.geneontology.org/cgi-bin/amigo/term_details?term=GO:0009820	no
regulation of translation	GO:0006417	0.3106	1	4	AFLA_031780|AFLA_041730|AFLA_101160|AFLA_131470	73	.	0	AFLA_031780|AFLA_041730|AFLA_101160|AFLA_131470	4	http://amigo.geneontology.org/cgi-bin/amigo/term_details?term=GO:0006417	no
toxin biosynthetic process	GO:0009403	0.31186	1	5	AFLA_058760|AFLA_118100|AFLA_065570|AFLA_002920|AFLA_138050	96	AFLA_065570	1	AFLA_058760|AFLA_118100|AFLA_002920|AFLA_138050	4	http://amigo.geneontology.org/cgi-bin/amigo/term_details?term=GO:0009403	no
lipid metabolic process	GO:0006629	0.31422	1	25	AFLA_029780|AFLA_030250|AFLA_030430|AFLA_106350|AFLA_107840|AFLA_108930|AFLA_109820|AFLA_110960|AFLA_124470|AFLA_073320|AFLA_073770|AFLA_077580|AFLA_119710|AFLA_014740|AFLA_018500|AFLA_021530|AFLA_044460|AFLA_099270|AFLA_065130|AFLA_065740|AFLA_066620|AFLA_003220|AFLA_003810|AFLA_049390|AFLA_138560	582	AFLA_029780|AFLA_030250|AFLA_106350|AFLA_108930|AFLA_110960|AFLA_073320|AFLA_073770|AFLA_077580|AFLA_119710|AFLA_014740|AFLA_018500|AFLA_021530|AFLA_066620|AFLA_003220|AFLA_003810|AFLA_138560	16	AFLA_030430|AFLA_107840|AFLA_109820|AFLA_124470|AFLA_044460|AFLA_099270|AFLA_065130|AFLA_065740|AFLA_049390	9	http://amigo.geneontology.org/cgi-bin/amigo/term_details?term=GO:0006629	no
positive regulation of molecular function	GO:0044093	0.31942	1	4	AFLA_034340|AFLA_018500|AFLA_038590|AFLA_102850	74	AFLA_018500|AFLA_038590|AFLA_102850	3	AFLA_034340	1	http://amigo.geneontology.org/cgi-bin/amigo/term_details?term=GO:0044093	no
single-multicellular organism process	GO:0044707	0.32153	1	11	AFLA_028740|AFLA_110340|AFLA_009750|AFLA_075840|AFLA_093230|AFLA_019060|AFLA_038590|AFLA_099280|AFLA_065130|AFLA_071180|AFLA_138560	240	AFLA_028740|AFLA_110340|AFLA_093230|AFLA_038590|AFLA_138560	5	AFLA_009750|AFLA_075840|AFLA_019060|AFLA_099280|AFLA_065130|AFLA_071180	6	http://amigo.geneontology.org/cgi-bin/amigo/term_details?term=GO:0044707	no
indole-containing compound metabolic process	GO:0042430	0.32315	1	2	AFLA_015920|AFLA_071180	30	.	0	AFLA_015920|AFLA_071180	2	http://amigo.geneontology.org/cgi-bin/amigo/term_details?term=GO:0042430	no
cellular polysaccharide catabolic process	GO:0044247	0.32498	1	3	AFLA_023490|AFLA_063040|AFLA_087870	52	AFLA_023490|AFLA_087870	2	AFLA_063040	1	http://amigo.geneontology.org/cgi-bin/amigo/term_details?term=GO:0044247	no
drug metabolic process	GO:0017144	0.32498	1	3	AFLA_024750|AFLA_057710|AFLA_070870	52	.	0	AFLA_024750|AFLA_057710|AFLA_070870	3	http://amigo.geneontology.org/cgi-bin/amigo/term_details?term=GO:0017144	no
inositol lipid-mediated signaling	GO:0048017	0.32547	1	1	AFLA_003220	10	AFLA_003220	1	.	0	http://amigo.geneontology.org/cgi-bin/amigo/term_details?term=GO:0048017	no
pyrimidine nucleoside salvage	GO:0043097	0.32547	1	1	AFLA_001850	10	AFLA_001850	1	.	0	http://amigo.geneontology.org/cgi-bin/amigo/term_details?term=GO:0043097	no
multi-multicellular organism process	GO:0044706	0.32547	1	1	AFLA_071180	10	.	0	AFLA_071180	1	http://amigo.geneontology.org/cgi-bin/amigo/term_details?term=GO:0044706	no
blood circulation	GO:0008015	0.32547	1	1	AFLA_038590	10	AFLA_038590	1	.	0	http://amigo.geneontology.org/cgi-bin/amigo/term_details?term=GO:0008015	no
flavonoid biosynthetic process	GO:0009813	0.32547	1	1	AFLA_065130	10	.	0	AFLA_065130	1	http://amigo.geneontology.org/cgi-bin/amigo/term_details?term=GO:0009813	no
single-organism membrane budding	GO:1902591	0.32547	1	1	AFLA_046150	10	AFLA_046150	1	.	0	http://amigo.geneontology.org/cgi-bin/amigo/term_details?term=GO:1902591	no
circulatory system process	GO:0003013	0.32547	1	1	AFLA_038590	10	AFLA_038590	1	.	0	http://amigo.geneontology.org/cgi-bin/amigo/term_details?term=GO:0003013	no
lymphocyte activation	GO:0046649	0.32547	1	1	AFLA_071180	10	.	0	AFLA_071180	1	http://amigo.geneontology.org/cgi-bin/amigo/term_details?term=GO:0046649	no
tube development	GO:0035295	0.32547	1	1	AFLA_110340	10	AFLA_110340	1	.	0	http://amigo.geneontology.org/cgi-bin/amigo/term_details?term=GO:0035295	no
unidimensional cell growth	GO:0009826	0.32547	1	1	AFLA_131330	10	AFLA_131330	1	.	0	http://amigo.geneontology.org/cgi-bin/amigo/term_details?term=GO:0009826	no
leukocyte activation	GO:0045321	0.32547	1	1	AFLA_071180	10	.	0	AFLA_071180	1	http://amigo.geneontology.org/cgi-bin/amigo/term_details?term=GO:0045321	no
protein-cofactor linkage	GO:0018065	0.32547	1	1	AFLA_067450	10	AFLA_067450	1	.	0	http://amigo.geneontology.org/cgi-bin/amigo/term_details?term=GO:0018065	no
sodium ion transport	GO:0006814	0.32547	1	1	AFLA_110050	10	.	0	AFLA_110050	1	http://amigo.geneontology.org/cgi-bin/amigo/term_details?term=GO:0006814	no
regulation of Rho protein signal transduction	GO:0035023	0.32547	1	1	AFLA_102850	10	AFLA_102850	1	.	0	http://amigo.geneontology.org/cgi-bin/amigo/term_details?term=GO:0035023	no
inositol metabolic process	GO:0006020	0.32547	1	1	AFLA_044400	10	.	0	AFLA_044400	1	http://amigo.geneontology.org/cgi-bin/amigo/term_details?term=GO:0006020	no
protein stabilization	GO:0050821	0.32547	1	1	AFLA_038590	10	AFLA_038590	1	.	0	http://amigo.geneontology.org/cgi-bin/amigo/term_details?term=GO:0050821	no
mating type switching	GO:0007533	0.32547	1	1	AFLA_073340	10	AFLA_073340	1	.	0	http://amigo.geneontology.org/cgi-bin/amigo/term_details?term=GO:0007533	no
seed development	GO:0048316	0.32547	1	1	AFLA_065130	10	.	0	AFLA_065130	1	http://amigo.geneontology.org/cgi-bin/amigo/term_details?term=GO:0048316	no
alditol catabolic process	GO:0019405	0.32547	1	1	AFLA_093790	10	.	0	AFLA_093790	1	http://amigo.geneontology.org/cgi-bin/amigo/term_details?term=GO:0019405	no
fruit development	GO:0010154	0.32547	1	1	AFLA_065130	10	.	0	AFLA_065130	1	http://amigo.geneontology.org/cgi-bin/amigo/term_details?term=GO:0010154	no
cell activation	GO:0001775	0.32547	1	1	AFLA_071180	10	.	0	AFLA_071180	1	http://amigo.geneontology.org/cgi-bin/amigo/term_details?term=GO:0001775	no
regulation of polysaccharide metabolic process	GO:0032881	0.32547	1	1	AFLA_075840	10	.	0	AFLA_075840	1	http://amigo.geneontology.org/cgi-bin/amigo/term_details?term=GO:0032881	no
cell migration	GO:0016477	0.32547	1	1	AFLA_075840	10	.	0	AFLA_075840	1	http://amigo.geneontology.org/cgi-bin/amigo/term_details?term=GO:0016477	no
peptide catabolic process	GO:0043171	0.32547	1	1	AFLA_035970	10	AFLA_035970	1	.	0	http://amigo.geneontology.org/cgi-bin/amigo/term_details?term=GO:0043171	no
leucine biosynthetic process	GO:0009098	0.32547	1	1	AFLA_134090	10	AFLA_134090	1	.	0	http://amigo.geneontology.org/cgi-bin/amigo/term_details?term=GO:0009098	no
uronic acid metabolic process	GO:0006063	0.32547	1	1	AFLA_065130	10	.	0	AFLA_065130	1	http://amigo.geneontology.org/cgi-bin/amigo/term_details?term=GO:0006063	no
animal organ development	GO:0048513	0.33117	1	6	AFLA_028740|AFLA_110340|AFLA_009750|AFLA_075840|AFLA_019060|AFLA_138560	122	AFLA_028740|AFLA_110340|AFLA_138560	3	AFLA_009750|AFLA_075840|AFLA_019060	3	http://amigo.geneontology.org/cgi-bin/amigo/term_details?term=GO:0048513	no
cellular component morphogenesis	GO:0032989	0.33117	1	6	AFLA_075840|AFLA_123350|AFLA_066700|AFLA_003220|AFLA_131330|AFLA_137060	122	AFLA_003220|AFLA_131330|AFLA_137060	3	AFLA_075840|AFLA_123350|AFLA_066700	3	http://amigo.geneontology.org/cgi-bin/amigo/term_details?term=GO:0032989	no
multicellular organismal process	GO:0032501	0.33617	1	11	AFLA_028740|AFLA_110340|AFLA_009750|AFLA_075840|AFLA_093230|AFLA_019060|AFLA_038590|AFLA_099280|AFLA_065130|AFLA_071180|AFLA_138560	243	AFLA_028740|AFLA_110340|AFLA_093230|AFLA_038590|AFLA_138560	5	AFLA_009750|AFLA_075840|AFLA_019060|AFLA_099280|AFLA_065130|AFLA_071180	6	http://amigo.geneontology.org/cgi-bin/amigo/term_details?term=GO:0032501	no
cell wall biogenesis	GO:0042546	0.33711	1	4	AFLA_011230|AFLA_075860|AFLA_123350|AFLA_066700	76	AFLA_011230|AFLA_075860	2	AFLA_123350|AFLA_066700	2	http://amigo.geneontology.org/cgi-bin/amigo/term_details?term=GO:0042546	no
locomotion	GO:0040011	0.33745	1	2	AFLA_075840|AFLA_003220	31	AFLA_003220	1	AFLA_075840	1	http://amigo.geneontology.org/cgi-bin/amigo/term_details?term=GO:0040011	no
phenol-containing compound biosynthetic process	GO:0046189	0.33745	1	2	AFLA_036110|AFLA_125270	31	.	0	AFLA_036110|AFLA_125270	2	http://amigo.geneontology.org/cgi-bin/amigo/term_details?term=GO:0046189	no
system development	GO:0048731	0.34532	1	8	AFLA_028740|AFLA_110340|AFLA_009750|AFLA_075840|AFLA_019060|AFLA_065130|AFLA_071180|AFLA_138560	172	AFLA_028740|AFLA_110340|AFLA_138560	3	AFLA_009750|AFLA_075840|AFLA_019060|AFLA_065130|AFLA_071180	5	http://amigo.geneontology.org/cgi-bin/amigo/term_details?term=GO:0048731	no
posttranscriptional regulation of gene expression	GO:0010608	0.35035	1	5	AFLA_031780|AFLA_038590|AFLA_041730|AFLA_101160|AFLA_131470	101	AFLA_038590	1	AFLA_031780|AFLA_041730|AFLA_101160|AFLA_131470	4	http://amigo.geneontology.org/cgi-bin/amigo/term_details?term=GO:0010608	no
membrane organization	GO:0061024	0.3512	1	8	AFLA_052640|AFLA_056120|AFLA_089900|AFLA_038590|AFLA_046150|AFLA_069190|AFLA_003270|AFLA_137060	173	AFLA_052640|AFLA_056120|AFLA_038590|AFLA_046150|AFLA_069190|AFLA_003270|AFLA_137060	7	AFLA_089900	1	http://amigo.geneontology.org/cgi-bin/amigo/term_details?term=GO:0061024	no
thioester biosynthetic process	GO:0035384	0.35154	1	1	AFLA_106350	11	AFLA_106350	1	.	0	http://amigo.geneontology.org/cgi-bin/amigo/term_details?term=GO:0035384	no
D-amino acid metabolic process	GO:0046416	0.35154	1	1	AFLA_060530	11	.	0	AFLA_060530	1	http://amigo.geneontology.org/cgi-bin/amigo/term_details?term=GO:0046416	no
peptidoglycan metabolic process	GO:0000270	0.35154	1	1	AFLA_123350	11	.	0	AFLA_123350	1	http://amigo.geneontology.org/cgi-bin/amigo/term_details?term=GO:0000270	no
cellular response to salt stress	GO:0071472	0.35154	1	1	AFLA_068440	11	AFLA_068440	1	.	0	http://amigo.geneontology.org/cgi-bin/amigo/term_details?term=GO:0071472	no
flavonoid metabolic process	GO:0009812	0.35154	1	1	AFLA_065130	11	.	0	AFLA_065130	1	http://amigo.geneontology.org/cgi-bin/amigo/term_details?term=GO:0009812	no
mitochondrial respiratory chain complex III biogenesis	GO:0097033	0.35154	1	1	AFLA_005180	11	.	0	AFLA_005180	1	http://amigo.geneontology.org/cgi-bin/amigo/term_details?term=GO:0097033	no
response to cold	GO:0009409	0.35154	1	1	AFLA_061280	11	.	0	AFLA_061280	1	http://amigo.geneontology.org/cgi-bin/amigo/term_details?term=GO:0009409	no
mating type determination	GO:0007531	0.35154	1	1	AFLA_073340	11	AFLA_073340	1	.	0	http://amigo.geneontology.org/cgi-bin/amigo/term_details?term=GO:0007531	no
xenobiotic catabolic process	GO:0042178	0.35154	1	1	AFLA_024750	11	.	0	AFLA_024750	1	http://amigo.geneontology.org/cgi-bin/amigo/term_details?term=GO:0042178	no
negative regulation of mitotic nuclear division	GO:0045839	0.35154	1	1	AFLA_047300	11	.	0	AFLA_047300	1	http://amigo.geneontology.org/cgi-bin/amigo/term_details?term=GO:0045839	no
protein depolymerization	GO:0051261	0.35154	1	1	AFLA_089900	11	.	0	AFLA_089900	1	http://amigo.geneontology.org/cgi-bin/amigo/term_details?term=GO:0051261	no
regulation of glutamine family amino acid metabolic process	GO:0000820	0.35154	1	1	AFLA_014490	11	AFLA_014490	1	.	0	http://amigo.geneontology.org/cgi-bin/amigo/term_details?term=GO:0000820	no
actin filament bundle assembly	GO:0051017	0.35154	1	1	AFLA_052640	11	AFLA_052640	1	.	0	http://amigo.geneontology.org/cgi-bin/amigo/term_details?term=GO:0051017	no
cell wall macromolecule catabolic process	GO:0016998	0.35154	1	1	AFLA_081980	11	.	0	AFLA_081980	1	http://amigo.geneontology.org/cgi-bin/amigo/term_details?term=GO:0016998	no
negative regulation of metaphase/anaphase transition of cell cycle	GO:1902100	0.35154	1	1	AFLA_047300	11	.	0	AFLA_047300	1	http://amigo.geneontology.org/cgi-bin/amigo/term_details?term=GO:1902100	no
pyrimidine-containing compound salvage	GO:0008655	0.35154	1	1	AFLA_001850	11	AFLA_001850	1	.	0	http://amigo.geneontology.org/cgi-bin/amigo/term_details?term=GO:0008655	no
cellular response to cytokine stimulus	GO:0071345	0.35154	1	1	AFLA_075840	11	.	0	AFLA_075840	1	http://amigo.geneontology.org/cgi-bin/amigo/term_details?term=GO:0071345	no
cellular glucose homeostasis	GO:0001678	0.35154	1	1	AFLA_028740	11	AFLA_028740	1	.	0	http://amigo.geneontology.org/cgi-bin/amigo/term_details?term=GO:0001678	no
response to carbohydrate	GO:0009743	0.35154	1	1	AFLA_028740	11	AFLA_028740	1	.	0	http://amigo.geneontology.org/cgi-bin/amigo/term_details?term=GO:0009743	no
regulation of cytokine production	GO:0001817	0.35154	1	1	AFLA_071180	11	.	0	AFLA_071180	1	http://amigo.geneontology.org/cgi-bin/amigo/term_details?term=GO:0001817	no
mitotic spindle assembly checkpoint	GO:0007094	0.35154	1	1	AFLA_047300	11	.	0	AFLA_047300	1	http://amigo.geneontology.org/cgi-bin/amigo/term_details?term=GO:0007094	no
hydrogen peroxide catabolic process	GO:0042744	0.35154	1	1	AFLA_030430	11	.	0	AFLA_030430	1	http://amigo.geneontology.org/cgi-bin/amigo/term_details?term=GO:0042744	no
acyl-CoA biosynthetic process	GO:0071616	0.35154	1	1	AFLA_106350	11	AFLA_106350	1	.	0	http://amigo.geneontology.org/cgi-bin/amigo/term_details?term=GO:0071616	no
epithelial cell differentiation	GO:0030855	0.35154	1	1	AFLA_110340	11	AFLA_110340	1	.	0	http://amigo.geneontology.org/cgi-bin/amigo/term_details?term=GO:0030855	no
negative regulation of mitotic metaphase/anaphase transition	GO:0045841	0.35154	1	1	AFLA_047300	11	.	0	AFLA_047300	1	http://amigo.geneontology.org/cgi-bin/amigo/term_details?term=GO:0045841	no
regulation of immune response	GO:0050776	0.35154	1	1	AFLA_071180	11	.	0	AFLA_071180	1	http://amigo.geneontology.org/cgi-bin/amigo/term_details?term=GO:0050776	no
cytolysis	GO:0019835	0.35154	1	1	AFLA_003810	11	AFLA_003810	1	.	0	http://amigo.geneontology.org/cgi-bin/amigo/term_details?term=GO:0019835	no
spindle assembly checkpoint	GO:0071173	0.35154	1	1	AFLA_047300	11	.	0	AFLA_047300	1	http://amigo.geneontology.org/cgi-bin/amigo/term_details?term=GO:0071173	no
negative regulation of small GTPase mediated signal transduction	GO:0051058	0.35154	1	1	AFLA_102850	11	AFLA_102850	1	.	0	http://amigo.geneontology.org/cgi-bin/amigo/term_details?term=GO:0051058	no
negative regulation of Ras protein signal transduction	GO:0046580	0.35154	1	1	AFLA_102850	11	AFLA_102850	1	.	0	http://amigo.geneontology.org/cgi-bin/amigo/term_details?term=GO:0046580	no
carnitine transport	GO:0015879	0.35167	1	2	AFLA_040450|AFLA_138640	32	.	0	AFLA_040450|AFLA_138640	2	http://amigo.geneontology.org/cgi-bin/amigo/term_details?term=GO:0015879	no
quaternary ammonium group transport	GO:0015697	0.35167	1	2	AFLA_040450|AFLA_138640	32	.	0	AFLA_040450|AFLA_138640	2	http://amigo.geneontology.org/cgi-bin/amigo/term_details?term=GO:0015697	no
(R)-carnitine transport	GO:1900749	0.35167	1	2	AFLA_040450|AFLA_138640	32	.	0	AFLA_040450|AFLA_138640	2	http://amigo.geneontology.org/cgi-bin/amigo/term_details?term=GO:1900749	no
amino-acid betaine transport	GO:0015838	0.35167	1	2	AFLA_040450|AFLA_138640	32	.	0	AFLA_040450|AFLA_138640	2	http://amigo.geneontology.org/cgi-bin/amigo/term_details?term=GO:0015838	no
establishment of protein localization to membrane	GO:0090150	0.35703	1	3	AFLA_052640|AFLA_089900|AFLA_038590	55	AFLA_052640|AFLA_038590	2	AFLA_089900	1	http://amigo.geneontology.org/cgi-bin/amigo/term_details?term=GO:0090150	no
serine family amino acid biosynthetic process	GO:0009070	0.36578	1	2	AFLA_060530|AFLA_021700	33	.	0	AFLA_060530|AFLA_021700	2	http://amigo.geneontology.org/cgi-bin/amigo/term_details?term=GO:0009070	no
maturation of SSU-rRNA from tricistronic rRNA transcript (SSU-rRNA, 5.8S rRNA, LSU-rRNA)	GO:0000462	0.36578	1	2	AFLA_035340|AFLA_044170	33	.	0	AFLA_035340|AFLA_044170	2	http://amigo.geneontology.org/cgi-bin/amigo/term_details?term=GO:0000462	no
regulation of cellular localization	GO:0060341	0.36768	1	3	AFLA_028740|AFLA_038590|AFLA_069190	56	AFLA_028740|AFLA_038590|AFLA_069190	3	.	0	http://amigo.geneontology.org/cgi-bin/amigo/term_details?term=GO:0060341	no
iron ion homeostasis	GO:0055072	0.36768	1	3	AFLA_077030|AFLA_126510|AFLA_050180	56	.	0	AFLA_077030|AFLA_126510|AFLA_050180	3	http://amigo.geneontology.org/cgi-bin/amigo/term_details?term=GO:0055072	no
reproductive process	GO:0022414	0.37194	1	9	AFLA_073340|AFLA_075840|AFLA_019060|AFLA_065130|AFLA_066700|AFLA_071180|AFLA_003220|AFLA_050300|AFLA_137060	201	AFLA_073340|AFLA_003220|AFLA_050300|AFLA_137060	4	AFLA_075840|AFLA_019060|AFLA_065130|AFLA_066700|AFLA_071180	5	http://amigo.geneontology.org/cgi-bin/amigo/term_details?term=GO:0022414	no
transition metal ion homeostasis	GO:0055076	0.37258	1	4	AFLA_077030|AFLA_126510|AFLA_003980|AFLA_050180	80	.	0	AFLA_077030|AFLA_126510|AFLA_003980|AFLA_050180	4	http://amigo.geneontology.org/cgi-bin/amigo/term_details?term=GO:0055076	no
lipid biosynthetic process	GO:0008610	0.37321	1	13	AFLA_030250|AFLA_030430|AFLA_106350|AFLA_107840|AFLA_108930|AFLA_077580|AFLA_119710|AFLA_044460|AFLA_065130|AFLA_065740|AFLA_066620|AFLA_003220|AFLA_138560	300	AFLA_030250|AFLA_106350|AFLA_108930|AFLA_077580|AFLA_119710|AFLA_066620|AFLA_003220|AFLA_138560	8	AFLA_030430|AFLA_107840|AFLA_044460|AFLA_065130|AFLA_065740	5	http://amigo.geneontology.org/cgi-bin/amigo/term_details?term=GO:0008610	no
toxin metabolic process	GO:0009404	0.37359	1	5	AFLA_058760|AFLA_118100|AFLA_065570|AFLA_002920|AFLA_138050	104	AFLA_065570	1	AFLA_058760|AFLA_118100|AFLA_002920|AFLA_138050	4	http://amigo.geneontology.org/cgi-bin/amigo/term_details?term=GO:0009404	no
carbohydrate homeostasis	GO:0033500	0.3766	1	1	AFLA_028740	12	AFLA_028740	1	.	0	http://amigo.geneontology.org/cgi-bin/amigo/term_details?term=GO:0033500	no
Golgi to plasma membrane protein transport	GO:0043001	0.3766	1	1	AFLA_089900	12	.	0	AFLA_089900	1	http://amigo.geneontology.org/cgi-bin/amigo/term_details?term=GO:0043001	no
magnesium ion transport	GO:0015693	0.3766	1	1	AFLA_018740	12	.	0	AFLA_018740	1	http://amigo.geneontology.org/cgi-bin/amigo/term_details?term=GO:0015693	no
positive regulation of protein kinase activity	GO:0045860	0.3766	1	1	AFLA_034340	12	.	0	AFLA_034340	1	http://amigo.geneontology.org/cgi-bin/amigo/term_details?term=GO:0045860	no
sex determination	GO:0007530	0.3766	1	1	AFLA_073340	12	AFLA_073340	1	.	0	http://amigo.geneontology.org/cgi-bin/amigo/term_details?term=GO:0007530	no
negative regulation of cell proliferation	GO:0008285	0.3766	1	1	AFLA_071180	12	.	0	AFLA_071180	1	http://amigo.geneontology.org/cgi-bin/amigo/term_details?term=GO:0008285	no
positive regulation of kinase activity	GO:0033674	0.3766	1	1	AFLA_034340	12	.	0	AFLA_034340	1	http://amigo.geneontology.org/cgi-bin/amigo/term_details?term=GO:0033674	no
prostanoid metabolic process	GO:0006692	0.3766	1	1	AFLA_030430	12	.	0	AFLA_030430	1	http://amigo.geneontology.org/cgi-bin/amigo/term_details?term=GO:0006692	no
prostaglandin metabolic process	GO:0006693	0.3766	1	1	AFLA_030430	12	.	0	AFLA_030430	1	http://amigo.geneontology.org/cgi-bin/amigo/term_details?term=GO:0006693	no
phenylpropanoid catabolic process	GO:0046271	0.3766	1	1	AFLA_120890	12	AFLA_120890	1	.	0	http://amigo.geneontology.org/cgi-bin/amigo/term_details?term=GO:0046271	no
cellular response to light stimulus	GO:0071482	0.3766	1	1	AFLA_065850	12	AFLA_065850	1	.	0	http://amigo.geneontology.org/cgi-bin/amigo/term_details?term=GO:0071482	no
cytokine production	GO:0001816	0.3766	1	1	AFLA_071180	12	.	0	AFLA_071180	1	http://amigo.geneontology.org/cgi-bin/amigo/term_details?term=GO:0001816	no
hydrogen peroxide metabolic process	GO:0042743	0.3766	1	1	AFLA_030430	12	.	0	AFLA_030430	1	http://amigo.geneontology.org/cgi-bin/amigo/term_details?term=GO:0042743	no
positive regulation of cell death	GO:0010942	0.3766	1	1	AFLA_071180	12	.	0	AFLA_071180	1	http://amigo.geneontology.org/cgi-bin/amigo/term_details?term=GO:0010942	no
extracellular polysaccharide metabolic process	GO:0046379	0.3766	1	1	AFLA_075840	12	.	0	AFLA_075840	1	http://amigo.geneontology.org/cgi-bin/amigo/term_details?term=GO:0046379	no
protein localization to kinetochore	GO:0034501	0.3766	1	1	AFLA_047300	12	.	0	AFLA_047300	1	http://amigo.geneontology.org/cgi-bin/amigo/term_details?term=GO:0034501	no
regulation of secretion	GO:0051046	0.3766	1	1	AFLA_028740	12	AFLA_028740	1	.	0	http://amigo.geneontology.org/cgi-bin/amigo/term_details?term=GO:0051046	no
glucose homeostasis	GO:0042593	0.3766	1	1	AFLA_028740	12	AFLA_028740	1	.	0	http://amigo.geneontology.org/cgi-bin/amigo/term_details?term=GO:0042593	no
cofactor transport	GO:0051181	0.3766	1	1	AFLA_075860	12	AFLA_075860	1	.	0	http://amigo.geneontology.org/cgi-bin/amigo/term_details?term=GO:0051181	no
endomembrane system organization	GO:0010256	0.37829	1	3	AFLA_052640|AFLA_089900|AFLA_038590	57	AFLA_052640|AFLA_038590	2	AFLA_089900	1	http://amigo.geneontology.org/cgi-bin/amigo/term_details?term=GO:0010256	no
hexose transmembrane transport	GO:0035428	0.37829	1	3	AFLA_043090|AFLA_097330|AFLA_131830	57	.	0	AFLA_043090|AFLA_097330|AFLA_131830	3	http://amigo.geneontology.org/cgi-bin/amigo/term_details?term=GO:0035428	no
regulation of vesicle-mediated transport	GO:0060627	0.37976	1	2	AFLA_056120|AFLA_069190	34	AFLA_056120|AFLA_069190	2	.	0	http://amigo.geneontology.org/cgi-bin/amigo/term_details?term=GO:0060627	no
purine ribonucleoside catabolic process	GO:0046130	0.37976	1	2	AFLA_102850|AFLA_134560	34	AFLA_102850|AFLA_134560	2	.	0	http://amigo.geneontology.org/cgi-bin/amigo/term_details?term=GO:0046130	no
regulation of cell differentiation	GO:0045595	0.37976	1	2	AFLA_073340|AFLA_075840	34	AFLA_073340	1	AFLA_075840	1	http://amigo.geneontology.org/cgi-bin/amigo/term_details?term=GO:0045595	no
developmental process involved in reproduction	GO:0003006	0.3798	1	6	AFLA_073340|AFLA_019060|AFLA_065130|AFLA_066700|AFLA_003220|AFLA_137060	129	AFLA_073340|AFLA_003220|AFLA_137060	3	AFLA_019060|AFLA_065130|AFLA_066700	3	http://amigo.geneontology.org/cgi-bin/amigo/term_details?term=GO:0003006	no
cell wall organization	GO:0071555	0.38078	1	8	AFLA_011230|AFLA_078120|AFLA_123350|AFLA_087880|AFLA_121370|AFLA_066700|AFLA_070170|AFLA_137200	178	AFLA_011230|AFLA_078120|AFLA_087880|AFLA_121370|AFLA_137200	5	AFLA_123350|AFLA_066700|AFLA_070170	3	http://amigo.geneontology.org/cgi-bin/amigo/term_details?term=GO:0071555	no
fatty acid catabolic process	GO:0009062	0.38887	1	3	AFLA_073320|AFLA_099270|AFLA_049390	58	AFLA_073320	1	AFLA_099270|AFLA_049390	2	http://amigo.geneontology.org/cgi-bin/amigo/term_details?term=GO:0009062	no
secretion	GO:0046903	0.38887	1	3	AFLA_028740|AFLA_003220|AFLA_137060	58	AFLA_028740|AFLA_003220|AFLA_137060	3	.	0	http://amigo.geneontology.org/cgi-bin/amigo/term_details?term=GO:0046903	no
movement of cell or subcellular component	GO:0006928	0.38887	1	3	AFLA_075840|AFLA_038590|AFLA_003220	58	AFLA_038590|AFLA_003220	2	AFLA_075840	1	http://amigo.geneontology.org/cgi-bin/amigo/term_details?term=GO:0006928	no
pyruvate metabolic process	GO:0006090	0.39362	1	2	AFLA_042390|AFLA_101470	35	AFLA_042390|AFLA_101470	2	.	0	http://amigo.geneontology.org/cgi-bin/amigo/term_details?term=GO:0006090	no
response to lipid	GO:0033993	0.39362	1	2	AFLA_071180|AFLA_003810	35	AFLA_003810	1	AFLA_071180	1	http://amigo.geneontology.org/cgi-bin/amigo/term_details?term=GO:0033993	no
multicellular organism development	GO:0007275	0.3998	1	9	AFLA_028740|AFLA_110340|AFLA_009750|AFLA_075840|AFLA_019060|AFLA_099280|AFLA_065130|AFLA_071180|AFLA_138560	206	AFLA_028740|AFLA_110340|AFLA_138560	3	AFLA_009750|AFLA_075840|AFLA_019060|AFLA_099280|AFLA_065130|AFLA_071180	6	http://amigo.geneontology.org/cgi-bin/amigo/term_details?term=GO:0007275	no
polyamine metabolic process	GO:0006595	0.4007	1	1	AFLA_138430	13	.	0	AFLA_138430	1	http://amigo.geneontology.org/cgi-bin/amigo/term_details?term=GO:0006595	no
actin filament bundle organization	GO:0061572	0.4007	1	1	AFLA_052640	13	AFLA_052640	1	.	0	http://amigo.geneontology.org/cgi-bin/amigo/term_details?term=GO:0061572	no
regulation of metal ion transport	GO:0010959	0.4007	1	1	AFLA_038590	13	AFLA_038590	1	.	0	http://amigo.geneontology.org/cgi-bin/amigo/term_details?term=GO:0010959	no
potassium ion transmembrane transport	GO:0071805	0.4007	1	1	AFLA_038590	13	AFLA_038590	1	.	0	http://amigo.geneontology.org/cgi-bin/amigo/term_details?term=GO:0071805	no
ascospore wall assembly	GO:0030476	0.4007	1	1	AFLA_066700	13	.	0	AFLA_066700	1	http://amigo.geneontology.org/cgi-bin/amigo/term_details?term=GO:0030476	no
establishment or maintenance of actin cytoskeleton polarity	GO:0030950	0.4007	1	1	AFLA_052640	13	AFLA_052640	1	.	0	http://amigo.geneontology.org/cgi-bin/amigo/term_details?term=GO:0030950	no
cellular potassium ion transport	GO:0071804	0.4007	1	1	AFLA_038590	13	AFLA_038590	1	.	0	http://amigo.geneontology.org/cgi-bin/amigo/term_details?term=GO:0071804	no
ascospore wall biogenesis	GO:0070591	0.4007	1	1	AFLA_066700	13	.	0	AFLA_066700	1	http://amigo.geneontology.org/cgi-bin/amigo/term_details?term=GO:0070591	no
iron chelate transport	GO:0015688	0.4007	1	1	AFLA_077030	13	.	0	AFLA_077030	1	http://amigo.geneontology.org/cgi-bin/amigo/term_details?term=GO:0015688	no
positive regulation of cell proliferation	GO:0008284	0.4007	1	1	AFLA_075840	13	.	0	AFLA_075840	1	http://amigo.geneontology.org/cgi-bin/amigo/term_details?term=GO:0008284	no
positive regulation of immune system process	GO:0002684	0.4007	1	1	AFLA_071180	13	.	0	AFLA_071180	1	http://amigo.geneontology.org/cgi-bin/amigo/term_details?term=GO:0002684	no
behavior	GO:0007610	0.4007	1	1	AFLA_071180	13	.	0	AFLA_071180	1	http://amigo.geneontology.org/cgi-bin/amigo/term_details?term=GO:0007610	no
protein targeting to plasma membrane	GO:0072661	0.4007	1	1	AFLA_038590	13	AFLA_038590	1	.	0	http://amigo.geneontology.org/cgi-bin/amigo/term_details?term=GO:0072661	no
siderophore transport	GO:0015891	0.4007	1	1	AFLA_077030	13	.	0	AFLA_077030	1	http://amigo.geneontology.org/cgi-bin/amigo/term_details?term=GO:0015891	no
maturation of LSU-rRNA from tricistronic rRNA transcript (SSU-rRNA, 5.8S rRNA, LSU-rRNA)	GO:0000463	0.4007	1	1	AFLA_079160	13	.	0	AFLA_079160	1	http://amigo.geneontology.org/cgi-bin/amigo/term_details?term=GO:0000463	no
glycine betaine biosynthetic process from choline	GO:0019285	0.4007	1	1	AFLA_079230	13	.	0	AFLA_079230	1	http://amigo.geneontology.org/cgi-bin/amigo/term_details?term=GO:0019285	no
brain development	GO:0007420	0.4007	1	1	AFLA_028740	13	AFLA_028740	1	.	0	http://amigo.geneontology.org/cgi-bin/amigo/term_details?term=GO:0007420	no
phenol-containing compound catabolic process	GO:0019336	0.4007	1	1	AFLA_125090	13	AFLA_125090	1	.	0	http://amigo.geneontology.org/cgi-bin/amigo/term_details?term=GO:0019336	no
glycine betaine biosynthetic process	GO:0031456	0.4007	1	1	AFLA_079230	13	.	0	AFLA_079230	1	http://amigo.geneontology.org/cgi-bin/amigo/term_details?term=GO:0031456	no
glycine betaine metabolic process	GO:0031455	0.4007	1	1	AFLA_079230	13	.	0	AFLA_079230	1	http://amigo.geneontology.org/cgi-bin/amigo/term_details?term=GO:0031455	no
muscle structure development	GO:0061061	0.4007	1	1	AFLA_038590	13	AFLA_038590	1	.	0	http://amigo.geneontology.org/cgi-bin/amigo/term_details?term=GO:0061061	no
transmembrane transport	GO:0055085	0.40204	1	25	AFLA_024520|AFLA_024810|AFLA_124130|AFLA_032450|AFLA_110050|AFLA_112960|AFLA_059480|AFLA_008850|AFLA_075860|AFLA_077030|AFLA_082760|AFLA_083400|AFLA_126510|AFLA_091020|AFLA_038590|AFLA_039360|AFLA_129430|AFLA_043090|AFLA_046070|AFLA_097330|AFLA_097710|AFLA_064430|AFLA_068440|AFLA_070950|AFLA_131830	609	AFLA_112960|AFLA_008850|AFLA_075860|AFLA_083400|AFLA_038590|AFLA_039360|AFLA_129430|AFLA_046070|AFLA_068440	9	AFLA_024520|AFLA_024810|AFLA_124130|AFLA_032450|AFLA_110050|AFLA_059480|AFLA_077030|AFLA_082760|AFLA_126510|AFLA_091020|AFLA_043090|AFLA_097330|AFLA_097710|AFLA_064430|AFLA_070950|AFLA_131830	16	http://amigo.geneontology.org/cgi-bin/amigo/term_details?term=GO:0055085	no
ribonucleoside catabolic process	GO:0042454	0.40734	1	2	AFLA_102850|AFLA_134560	36	AFLA_102850|AFLA_134560	2	.	0	http://amigo.geneontology.org/cgi-bin/amigo/term_details?term=GO:0042454	no
regulation of apoptotic process	GO:0042981	0.40734	1	2	AFLA_031780|AFLA_071180	36	.	0	AFLA_031780|AFLA_071180	2	http://amigo.geneontology.org/cgi-bin/amigo/term_details?term=GO:0042981	no
glucan catabolic process	GO:0009251	0.40989	1	3	AFLA_023490|AFLA_063040|AFLA_087870	60	AFLA_023490|AFLA_087870	2	AFLA_063040	1	http://amigo.geneontology.org/cgi-bin/amigo/term_details?term=GO:0009251	no
external encapsulating structure organization	GO:0045229	0.41051	1	8	AFLA_011230|AFLA_078120|AFLA_123350|AFLA_087880|AFLA_121370|AFLA_066700|AFLA_070170|AFLA_137200	183	AFLA_011230|AFLA_078120|AFLA_087880|AFLA_121370|AFLA_137200	5	AFLA_123350|AFLA_066700|AFLA_070170	3	http://amigo.geneontology.org/cgi-bin/amigo/term_details?term=GO:0045229	no
protein localization to membrane	GO:0072657	0.42032	1	3	AFLA_052640|AFLA_089900|AFLA_038590	61	AFLA_052640|AFLA_038590	2	AFLA_089900	1	http://amigo.geneontology.org/cgi-bin/amigo/term_details?term=GO:0072657	no
purine-containing compound catabolic process	GO:0072523	0.42032	1	3	AFLA_023420|AFLA_102850|AFLA_134560	61	AFLA_102850|AFLA_134560	2	AFLA_023420	1	http://amigo.geneontology.org/cgi-bin/amigo/term_details?term=GO:0072523	no
purine nucleoside catabolic process	GO:0006152	0.42091	1	2	AFLA_102850|AFLA_134560	37	AFLA_102850|AFLA_134560	2	.	0	http://amigo.geneontology.org/cgi-bin/amigo/term_details?term=GO:0006152	no
regulation of programmed cell death	GO:0043067	0.42091	1	2	AFLA_031780|AFLA_071180	37	.	0	AFLA_031780|AFLA_071180	2	http://amigo.geneontology.org/cgi-bin/amigo/term_details?term=GO:0043067	no
organic cation transport	GO:0015695	0.42091	1	2	AFLA_040450|AFLA_138640	37	.	0	AFLA_040450|AFLA_138640	2	http://amigo.geneontology.org/cgi-bin/amigo/term_details?term=GO:0015695	no
vesicle-mediated transport	GO:0016192	0.42091	1	11	AFLA_056120|AFLA_078270|AFLA_089900|AFLA_095670|AFLA_045960|AFLA_046150|AFLA_098090|AFLA_098330|AFLA_069190|AFLA_003220|AFLA_137060	260	AFLA_056120|AFLA_078270|AFLA_045960|AFLA_046150|AFLA_098090|AFLA_098330|AFLA_069190|AFLA_003220|AFLA_137060	9	AFLA_089900|AFLA_095670	2	http://amigo.geneontology.org/cgi-bin/amigo/term_details?term=GO:0016192	no
cell growth	GO:0016049	0.42091	1	2	AFLA_052640|AFLA_131330	37	AFLA_052640|AFLA_131330	2	.	0	http://amigo.geneontology.org/cgi-bin/amigo/term_details?term=GO:0016049	no
amine transport	GO:0015837	0.42091	1	2	AFLA_040450|AFLA_138640	37	.	0	AFLA_040450|AFLA_138640	2	http://amigo.geneontology.org/cgi-bin/amigo/term_details?term=GO:0015837	no
response to wounding	GO:0009611	0.42387	1	1	AFLA_071180	14	.	0	AFLA_071180	1	http://amigo.geneontology.org/cgi-bin/amigo/term_details?term=GO:0009611	no
response to cytokine	GO:0034097	0.42387	1	1	AFLA_075840	14	.	0	AFLA_075840	1	http://amigo.geneontology.org/cgi-bin/amigo/term_details?term=GO:0034097	no
signal transduction involved in conjugation with cellular fusion	GO:0032005	0.42387	1	1	AFLA_050300	14	AFLA_050300	1	.	0	http://amigo.geneontology.org/cgi-bin/amigo/term_details?term=GO:0032005	no
acetyl-CoA metabolic process	GO:0006084	0.42387	1	1	AFLA_106350	14	AFLA_106350	1	.	0	http://amigo.geneontology.org/cgi-bin/amigo/term_details?term=GO:0006084	no
fungal-type cell wall assembly	GO:0071940	0.42387	1	1	AFLA_066700	14	.	0	AFLA_066700	1	http://amigo.geneontology.org/cgi-bin/amigo/term_details?term=GO:0071940	no
spindle checkpoint	GO:0031577	0.42387	1	1	AFLA_047300	14	.	0	AFLA_047300	1	http://amigo.geneontology.org/cgi-bin/amigo/term_details?term=GO:0031577	no
polyketide biosynthetic process	GO:0030639	0.42387	1	1	AFLA_110890	14	AFLA_110890	1	.	0	http://amigo.geneontology.org/cgi-bin/amigo/term_details?term=GO:0030639	no
cell fate commitment	GO:0045165	0.42387	1	1	AFLA_073340	14	AFLA_073340	1	.	0	http://amigo.geneontology.org/cgi-bin/amigo/term_details?term=GO:0045165	no
response to transition metal nanoparticle	GO:1990267	0.42387	1	1	AFLA_003980	14	.	0	AFLA_003980	1	http://amigo.geneontology.org/cgi-bin/amigo/term_details?term=GO:1990267	no
chitin biosynthetic process	GO:0006031	0.42387	1	1	AFLA_137200	14	AFLA_137200	1	.	0	http://amigo.geneontology.org/cgi-bin/amigo/term_details?term=GO:0006031	no
ribosomal subunit export from nucleus	GO:0000054	0.42387	1	1	AFLA_098430	14	.	0	AFLA_098430	1	http://amigo.geneontology.org/cgi-bin/amigo/term_details?term=GO:0000054	no
positive regulation of cell-substrate adhesion	GO:0010811	0.42387	1	1	AFLA_075840	14	.	0	AFLA_075840	1	http://amigo.geneontology.org/cgi-bin/amigo/term_details?term=GO:0010811	no
positive regulation of cell differentiation	GO:0045597	0.42387	1	1	AFLA_075840	14	.	0	AFLA_075840	1	http://amigo.geneontology.org/cgi-bin/amigo/term_details?term=GO:0045597	no
ribonucleoprotein complex export from nucleus	GO:0071426	0.42387	1	1	AFLA_098430	14	.	0	AFLA_098430	1	http://amigo.geneontology.org/cgi-bin/amigo/term_details?term=GO:0071426	no
rRNA-containing ribonucleoprotein complex export from nucleus	GO:0071428	0.42387	1	1	AFLA_098430	14	.	0	AFLA_098430	1	http://amigo.geneontology.org/cgi-bin/amigo/term_details?term=GO:0071428	no
cellular amide catabolic process	GO:0043605	0.42387	1	1	AFLA_063160	14	.	0	AFLA_063160	1	http://amigo.geneontology.org/cgi-bin/amigo/term_details?term=GO:0043605	no
establishment of ribosome localization	GO:0033753	0.42387	1	1	AFLA_098430	14	.	0	AFLA_098430	1	http://amigo.geneontology.org/cgi-bin/amigo/term_details?term=GO:0033753	no
regulation of protein stability	GO:0031647	0.42387	1	1	AFLA_038590	14	AFLA_038590	1	.	0	http://amigo.geneontology.org/cgi-bin/amigo/term_details?term=GO:0031647	no
mitotic spindle checkpoint	GO:0071174	0.42387	1	1	AFLA_047300	14	.	0	AFLA_047300	1	http://amigo.geneontology.org/cgi-bin/amigo/term_details?term=GO:0071174	no
ribonucleoprotein complex localization	GO:0071166	0.42387	1	1	AFLA_098430	14	.	0	AFLA_098430	1	http://amigo.geneontology.org/cgi-bin/amigo/term_details?term=GO:0071166	no
ethanol metabolic process	GO:0006067	0.42387	1	1	AFLA_017590	14	AFLA_017590	1	.	0	http://amigo.geneontology.org/cgi-bin/amigo/term_details?term=GO:0006067	no
glucosamine-containing compound biosynthetic process	GO:1901073	0.42387	1	1	AFLA_137200	14	AFLA_137200	1	.	0	http://amigo.geneontology.org/cgi-bin/amigo/term_details?term=GO:1901073	no
ribosome localization	GO:0033750	0.42387	1	1	AFLA_098430	14	.	0	AFLA_098430	1	http://amigo.geneontology.org/cgi-bin/amigo/term_details?term=GO:0033750	no
glycerol metabolic process	GO:0006071	0.42387	1	1	AFLA_093790	14	.	0	AFLA_093790	1	http://amigo.geneontology.org/cgi-bin/amigo/term_details?term=GO:0006071	no
polysaccharide catabolic process	GO:0000272	0.42771	1	9	AFLA_023490|AFLA_031380|AFLA_063040|AFLA_063680|AFLA_054470|AFLA_081980|AFLA_087870|AFLA_122400|AFLA_070170	211	AFLA_023490|AFLA_031380|AFLA_054470|AFLA_087870	4	AFLA_063040|AFLA_063680|AFLA_081980|AFLA_122400|AFLA_070170	5	http://amigo.geneontology.org/cgi-bin/amigo/term_details?term=GO:0000272	no
carbohydrate transmembrane transport	GO:0034219	0.43069	1	3	AFLA_043090|AFLA_097330|AFLA_131830	62	.	0	AFLA_043090|AFLA_097330|AFLA_131830	3	http://amigo.geneontology.org/cgi-bin/amigo/term_details?term=GO:0034219	no
nucleoside catabolic process	GO:0009164	0.43431	1	2	AFLA_102850|AFLA_134560	38	AFLA_102850|AFLA_134560	2	.	0	http://amigo.geneontology.org/cgi-bin/amigo/term_details?term=GO:0009164	no
single-organism metabolic process	GO:0044710	0.43521	1	99	AFLA_023420|AFLA_024510|AFLA_024750|AFLA_028740|AFLA_029780|AFLA_030250|AFLA_030430|AFLA_031780|AFLA_035030|AFLA_035970|AFLA_036090|AFLA_036110|AFLA_036440|AFLA_106350|AFLA_107840|AFLA_108930|AFLA_109820|AFLA_110340|AFLA_110890|AFLA_110930|AFLA_110960|AFLA_112010|AFLA_056250|AFLA_058760|AFLA_060530|AFLA_060700|AFLA_061280|AFLA_062260|AFLA_063160|AFLA_063420|AFLA_124470|AFLA_012050|AFLA_012080|AFL…	2522	AFLA_028740|AFLA_029780|AFLA_030250|AFLA_035030|AFLA_035970|AFLA_106350|AFLA_108930|AFLA_110340|AFLA_110890|AFLA_110960|AFLA_112010|AFLA_062260|AFLA_073320|AFLA_073340|AFLA_073770|AFLA_077580|AFLA_116430|AFLA_119710|AFLA_120890|AFLA_122560|AFLA_122570|AFLA_092640|AFLA_093230|AFLA_014490|AFLA_014740|AFLA_017580|AFLA_017590|AFLA_018500|AFLA_021530|AFLA_042390|AFLA_047080|AFLA_101470|AFLA_102850|AFL…	45	AFLA_023420|AFLA_024510|AFLA_024750|AFLA_030430|AFLA_031780|AFLA_036090|AFLA_036110|AFLA_036440|AFLA_107840|AFLA_109820|AFLA_110930|AFLA_056250|AFLA_058760|AFLA_060530|AFLA_060700|AFLA_061280|AFLA_063160|AFLA_063420|AFLA_124470|AFLA_012050|AFLA_012080|AFLA_125270|AFLA_075840|AFLA_078420|AFLA_079230|AFLA_125680|AFLA_125700|AFLA_084230|AFLA_123350|AFLA_118100|AFLA_122210|AFLA_093790|AFLA_015920|AFL…	54	http://amigo.geneontology.org/cgi-bin/amigo/term_details?term=GO:0044710	no
response to bacterium	GO:0009617	0.44615	1	1	AFLA_071180	15	.	0	AFLA_071180	1	http://amigo.geneontology.org/cgi-bin/amigo/term_details?term=GO:0009617	no
pyrimidine ribonucleoside monophosphate metabolic process	GO:0009173	0.44615	1	1	AFLA_001850	15	AFLA_001850	1	.	0	http://amigo.geneontology.org/cgi-bin/amigo/term_details?term=GO:0009173	no
purine nucleobase catabolic process	GO:0006145	0.44615	1	1	AFLA_023420	15	.	0	AFLA_023420	1	http://amigo.geneontology.org/cgi-bin/amigo/term_details?term=GO:0006145	no
cellular response to radiation	GO:0071478	0.44615	1	1	AFLA_065850	15	AFLA_065850	1	.	0	http://amigo.geneontology.org/cgi-bin/amigo/term_details?term=GO:0071478	no
protein O-linked glycosylation	GO:0006493	0.44615	1	1	AFLA_110340	15	AFLA_110340	1	.	0	http://amigo.geneontology.org/cgi-bin/amigo/term_details?term=GO:0006493	no
polyketide metabolic process	GO:0030638	0.44615	1	1	AFLA_110890	15	AFLA_110890	1	.	0	http://amigo.geneontology.org/cgi-bin/amigo/term_details?term=GO:0030638	no
nucleotide transport	GO:0006862	0.44615	1	1	AFLA_075860	15	AFLA_075860	1	.	0	http://amigo.geneontology.org/cgi-bin/amigo/term_details?term=GO:0006862	no
pyrimidine ribonucleoside monophosphate biosynthetic process	GO:0009174	0.44615	1	1	AFLA_001850	15	AFLA_001850	1	.	0	http://amigo.geneontology.org/cgi-bin/amigo/term_details?term=GO:0009174	no
UMP biosynthetic process	GO:0006222	0.44615	1	1	AFLA_001850	15	AFLA_001850	1	.	0	http://amigo.geneontology.org/cgi-bin/amigo/term_details?term=GO:0006222	no
retrograde transport, endosome to plasma membrane	GO:1990126	0.44615	1	1	AFLA_095670	15	.	0	AFLA_095670	1	http://amigo.geneontology.org/cgi-bin/amigo/term_details?term=GO:1990126	no
Rho protein signal transduction	GO:0007266	0.44615	1	1	AFLA_102850	15	AFLA_102850	1	.	0	http://amigo.geneontology.org/cgi-bin/amigo/term_details?term=GO:0007266	no
neurological system process	GO:0050877	0.44615	1	1	AFLA_093230	15	AFLA_093230	1	.	0	http://amigo.geneontology.org/cgi-bin/amigo/term_details?term=GO:0050877	no
positive regulation of response to external stimulus	GO:0032103	0.44615	1	1	AFLA_071180	15	.	0	AFLA_071180	1	http://amigo.geneontology.org/cgi-bin/amigo/term_details?term=GO:0032103	no
UMP metabolic process	GO:0046049	0.44615	1	1	AFLA_001850	15	AFLA_001850	1	.	0	http://amigo.geneontology.org/cgi-bin/amigo/term_details?term=GO:0046049	no
regulation of intracellular transport	GO:0032386	0.44755	1	2	AFLA_038590|AFLA_069190	39	AFLA_038590|AFLA_069190	2	.	0	http://amigo.geneontology.org/cgi-bin/amigo/term_details?term=GO:0032386	no
ketone biosynthetic process	GO:0042181	0.44755	1	2	AFLA_110890|AFLA_103000	39	AFLA_110890|AFLA_103000	2	.	0	http://amigo.geneontology.org/cgi-bin/amigo/term_details?term=GO:0042181	no
cell proliferation	GO:0008283	0.44755	1	2	AFLA_075840|AFLA_071180	39	.	0	AFLA_075840|AFLA_071180	2	http://amigo.geneontology.org/cgi-bin/amigo/term_details?term=GO:0008283	no
exocytosis	GO:0006887	0.44755	1	2	AFLA_003220|AFLA_137060	39	AFLA_003220|AFLA_137060	2	.	0	http://amigo.geneontology.org/cgi-bin/amigo/term_details?term=GO:0006887	no
organophosphate catabolic process	GO:0046434	0.45123	1	3	AFLA_110960|AFLA_102850|AFLA_003810	64	AFLA_110960|AFLA_102850|AFLA_003810	3	.	0	http://amigo.geneontology.org/cgi-bin/amigo/term_details?term=GO:0046434	no
maintenance of location	GO:0051235	0.45123	1	3	AFLA_038590|AFLA_003980|AFLA_050180	64	AFLA_038590	1	AFLA_003980|AFLA_050180	2	http://amigo.geneontology.org/cgi-bin/amigo/term_details?term=GO:0051235	no
glycosyl compound catabolic process	GO:1901658	0.46061	1	2	AFLA_102850|AFLA_134560	40	AFLA_102850|AFLA_134560	2	.	0	http://amigo.geneontology.org/cgi-bin/amigo/term_details?term=GO:1901658	no
xylan metabolic process	GO:0045491	0.46061	1	2	AFLA_063680|AFLA_081980	40	.	0	AFLA_063680|AFLA_081980	2	http://amigo.geneontology.org/cgi-bin/amigo/term_details?term=GO:0045491	no
xylan catabolic process	GO:0045493	0.46061	1	2	AFLA_063680|AFLA_081980	40	.	0	AFLA_063680|AFLA_081980	2	http://amigo.geneontology.org/cgi-bin/amigo/term_details?term=GO:0045493	no
ethanolamine-containing compound metabolic process	GO:0042439	0.46061	1	2	AFLA_079230|AFLA_003810	40	AFLA_003810	1	AFLA_079230	1	http://amigo.geneontology.org/cgi-bin/amigo/term_details?term=GO:0042439	no
single-organism transport	GO:0044765	0.46603	1	49	AFLA_024520|AFLA_024810|AFLA_028740|AFLA_124130|AFLA_032450|AFLA_034340|AFLA_106750|AFLA_052640|AFLA_110050|AFLA_112960|AFLA_059480|AFLA_007610|AFLA_008850|AFLA_009750|AFLA_075840|AFLA_075860|AFLA_077030|AFLA_080990|AFLA_082760|AFLA_083400|AFLA_126510|AFLA_089900|AFLA_091020|AFLA_095670|AFLA_018740|AFLA_038590|AFLA_039360|AFLA_040450|AFLA_129430|AFLA_043090|AFLA_045770|AFLA_045960|AFLA_046070|AFL…	1246	AFLA_028740|AFLA_052640|AFLA_112960|AFLA_007610|AFLA_008850|AFLA_075860|AFLA_083400|AFLA_038590|AFLA_039360|AFLA_129430|AFLA_045770|AFLA_045960|AFLA_046070|AFLA_046150|AFLA_068440|AFLA_069190|AFLA_003050|AFLA_003220|AFLA_137060	19	AFLA_024520|AFLA_024810|AFLA_124130|AFLA_032450|AFLA_034340|AFLA_106750|AFLA_110050|AFLA_059480|AFLA_009750|AFLA_075840|AFLA_077030|AFLA_080990|AFLA_082760|AFLA_126510|AFLA_089900|AFLA_091020|AFLA_095670|AFLA_018740|AFLA_040450|AFLA_043090|AFLA_047300|AFLA_097330|AFLA_097710|AFLA_098430|AFLA_064430|AFLA_070950|AFLA_003980|AFLA_131830|AFLA_050180|AFLA_138640	30	http://amigo.geneontology.org/cgi-bin/amigo/term_details?term=GO:0044765	no
cell wall organization or biogenesis	GO:0071554	0.46606	1	11	AFLA_063680|AFLA_011230|AFLA_075860|AFLA_078120|AFLA_081980|AFLA_123350|AFLA_087880|AFLA_121370|AFLA_066700|AFLA_070170|AFLA_137200	269	AFLA_011230|AFLA_075860|AFLA_078120|AFLA_087880|AFLA_121370|AFLA_137200	6	AFLA_063680|AFLA_081980|AFLA_123350|AFLA_066700|AFLA_070170	5	http://amigo.geneontology.org/cgi-bin/amigo/term_details?term=GO:0071554	no
endonucleolytic cleavage involved in rRNA processing	GO:0000478	0.46757	1	1	AFLA_093880	16	.	0	AFLA_093880	1	http://amigo.geneontology.org/cgi-bin/amigo/term_details?term=GO:0000478	no
tetrahydrofolate metabolic process	GO:0046653	0.46757	1	1	AFLA_047080	16	AFLA_047080	1	.	0	http://amigo.geneontology.org/cgi-bin/amigo/term_details?term=GO:0046653	no
cellular zinc ion homeostasis	GO:0006882	0.46757	1	1	AFLA_003980	16	.	0	AFLA_003980	1	http://amigo.geneontology.org/cgi-bin/amigo/term_details?term=GO:0006882	no
lysine catabolic process	GO:0006554	0.46757	1	1	AFLA_005130	16	.	0	AFLA_005130	1	http://amigo.geneontology.org/cgi-bin/amigo/term_details?term=GO:0006554	no
inflammatory response	GO:0006954	0.46757	1	1	AFLA_071180	16	.	0	AFLA_071180	1	http://amigo.geneontology.org/cgi-bin/amigo/term_details?term=GO:0006954	no
establishment or maintenance of cytoskeleton polarity	GO:0030952	0.46757	1	1	AFLA_052640	16	AFLA_052640	1	.	0	http://amigo.geneontology.org/cgi-bin/amigo/term_details?term=GO:0030952	no
nucleoside salvage	GO:0043174	0.46757	1	1	AFLA_001850	16	AFLA_001850	1	.	0	http://amigo.geneontology.org/cgi-bin/amigo/term_details?term=GO:0043174	no
sulfur compound catabolic process	GO:0044273	0.46757	1	1	AFLA_035970	16	AFLA_035970	1	.	0	http://amigo.geneontology.org/cgi-bin/amigo/term_details?term=GO:0044273	no
zinc ion homeostasis	GO:0055069	0.46757	1	1	AFLA_003980	16	.	0	AFLA_003980	1	http://amigo.geneontology.org/cgi-bin/amigo/term_details?term=GO:0055069	no
membrane budding	GO:0006900	0.46757	1	1	AFLA_046150	16	AFLA_046150	1	.	0	http://amigo.geneontology.org/cgi-bin/amigo/term_details?term=GO:0006900	no
unsaturated fatty acid biosynthetic process	GO:0006636	0.46757	1	1	AFLA_030430	16	.	0	AFLA_030430	1	http://amigo.geneontology.org/cgi-bin/amigo/term_details?term=GO:0006636	no
L-lysine metabolic process	GO:0046440	0.46757	1	1	AFLA_005130	16	.	0	AFLA_005130	1	http://amigo.geneontology.org/cgi-bin/amigo/term_details?term=GO:0046440	no
riboflavin transport	GO:0032218	0.46757	1	1	AFLA_097710	16	.	0	AFLA_097710	1	http://amigo.geneontology.org/cgi-bin/amigo/term_details?term=GO:0032218	no
regulation of ion transmembrane transport	GO:0034765	0.46757	1	1	AFLA_038590	16	AFLA_038590	1	.	0	http://amigo.geneontology.org/cgi-bin/amigo/term_details?term=GO:0034765	no
choline metabolic process	GO:0019695	0.46757	1	1	AFLA_079230	16	.	0	AFLA_079230	1	http://amigo.geneontology.org/cgi-bin/amigo/term_details?term=GO:0019695	no
spore wall biogenesis	GO:0070590	0.46757	1	1	AFLA_066700	16	.	0	AFLA_066700	1	http://amigo.geneontology.org/cgi-bin/amigo/term_details?term=GO:0070590	no
nucleotide salvage	GO:0043173	0.46757	1	1	AFLA_001850	16	AFLA_001850	1	.	0	http://amigo.geneontology.org/cgi-bin/amigo/term_details?term=GO:0043173	no
iron coordination entity transport	GO:1901678	0.46757	1	1	AFLA_077030	16	.	0	AFLA_077030	1	http://amigo.geneontology.org/cgi-bin/amigo/term_details?term=GO:1901678	no
cellular biogenic amine biosynthetic process	GO:0042401	0.46757	1	1	AFLA_138430	16	.	0	AFLA_138430	1	http://amigo.geneontology.org/cgi-bin/amigo/term_details?term=GO:0042401	no
L-lysine catabolic process	GO:0019477	0.46757	1	1	AFLA_005130	16	.	0	AFLA_005130	1	http://amigo.geneontology.org/cgi-bin/amigo/term_details?term=GO:0019477	no
zinc II ion transport	GO:0006829	0.46757	1	1	AFLA_003980	16	.	0	AFLA_003980	1	http://amigo.geneontology.org/cgi-bin/amigo/term_details?term=GO:0006829	no
regulation of cell-substrate adhesion	GO:0010810	0.46757	1	1	AFLA_075840	16	.	0	AFLA_075840	1	http://amigo.geneontology.org/cgi-bin/amigo/term_details?term=GO:0010810	no
amine biosynthetic process	GO:0009309	0.46757	1	1	AFLA_138430	16	.	0	AFLA_138430	1	http://amigo.geneontology.org/cgi-bin/amigo/term_details?term=GO:0009309	no
protein localization to endoplasmic reticulum	GO:0070972	0.46757	1	1	AFLA_038590	16	AFLA_038590	1	.	0	http://amigo.geneontology.org/cgi-bin/amigo/term_details?term=GO:0070972	no
spore wall assembly	GO:0042244	0.46757	1	1	AFLA_066700	16	.	0	AFLA_066700	1	http://amigo.geneontology.org/cgi-bin/amigo/term_details?term=GO:0042244	no
regulation of biological quality	GO:0065008	0.4726	1	18	AFLA_028740|AFLA_031780|AFLA_032000|AFLA_009750|AFLA_075840|AFLA_075860|AFLA_077030|AFLA_123350|AFLA_126510|AFLA_038590|AFLA_129430|AFLA_046150|AFLA_099270|AFLA_101160|AFLA_068440|AFLA_003810|AFLA_003980|AFLA_050180	450	AFLA_028740|AFLA_032000|AFLA_075860|AFLA_038590|AFLA_129430|AFLA_046150|AFLA_068440|AFLA_003810	8	AFLA_031780|AFLA_009750|AFLA_075840|AFLA_077030|AFLA_123350|AFLA_126510|AFLA_099270|AFLA_101160|AFLA_003980|AFLA_050180	10	http://amigo.geneontology.org/cgi-bin/amigo/term_details?term=GO:0065008	no
cellular response to organic substance	GO:0071310	0.47334	1	5	AFLA_028740|AFLA_075840|AFLA_003220|AFLA_003810|AFLA_050300	117	AFLA_028740|AFLA_003220|AFLA_003810|AFLA_050300	4	AFLA_075840	1	http://amigo.geneontology.org/cgi-bin/amigo/term_details?term=GO:0071310	no
generation of precursor metabolites and energy	GO:0006091	0.47334	1	5	AFLA_012080|AFLA_042390|AFLA_101470|AFLA_049390|AFLA_005130	117	AFLA_042390|AFLA_101470	2	AFLA_012080|AFLA_049390|AFLA_005130	3	http://amigo.geneontology.org/cgi-bin/amigo/term_details?term=GO:0006091	no
organic substance biosynthetic process	GO:1901576	0.48346	1	89	AFLA_023420|AFLA_024750|AFLA_050800|AFLA_026100|AFLA_030140|AFLA_030250|AFLA_030430|AFLA_031780|AFLA_034340|AFLA_035030|AFLA_036110|AFLA_036440|AFLA_106350|AFLA_107840|AFLA_108930|AFLA_109820|AFLA_110340|AFLA_110890|AFLA_110930|AFLA_111980|AFLA_112010|AFLA_112090|AFLA_054760|AFLA_056250|AFLA_058760|AFLA_060530|AFLA_060700|AFLA_063420|AFLA_012050|AFLA_012080|AFLA_073340|AFLA_075030|AFLA_125270|AFL…	2287	AFLA_026100|AFLA_030250|AFLA_035030|AFLA_106350|AFLA_108930|AFLA_110340|AFLA_110890|AFLA_112010|AFLA_073340|AFLA_077580|AFLA_085740|AFLA_086100|AFLA_116430|AFLA_119710|AFLA_122560|AFLA_122570|AFLA_093230|AFLA_128330|AFLA_014490|AFLA_045770|AFLA_103000|AFLA_065570|AFLA_065850|AFLA_066620|AFLA_001850|AFLA_003220|AFLA_003270|AFLA_131330|AFLA_134090|AFLA_050300|AFLA_137200|AFLA_138560	32	AFLA_023420|AFLA_024750|AFLA_050800|AFLA_030140|AFLA_030430|AFLA_031780|AFLA_034340|AFLA_036110|AFLA_036440|AFLA_107840|AFLA_109820|AFLA_110930|AFLA_111980|AFLA_112090|AFLA_054760|AFLA_056250|AFLA_058760|AFLA_060530|AFLA_060700|AFLA_063420|AFLA_012050|AFLA_012080|AFLA_075030|AFLA_125270|AFLA_075840|AFLA_079230|AFLA_079880|AFLA_080140|AFLA_082850|AFLA_084230|AFLA_123350|AFLA_118100|AFLA_127220|AFL…	57	http://amigo.geneontology.org/cgi-bin/amigo/term_details?term=GO:1901576	no
fungal-type cell wall organization or biogenesis	GO:0071852	0.4856	1	4	AFLA_011230|AFLA_075860|AFLA_087880|AFLA_066700	93	AFLA_011230|AFLA_075860|AFLA_087880	3	AFLA_066700	1	http://amigo.geneontology.org/cgi-bin/amigo/term_details?term=GO:0071852	no
cell morphogenesis	GO:0000902	0.4856	1	4	AFLA_075840|AFLA_123350|AFLA_003220|AFLA_131330	93	AFLA_003220|AFLA_131330	2	AFLA_075840|AFLA_123350	2	http://amigo.geneontology.org/cgi-bin/amigo/term_details?term=GO:0000902	no
monosaccharide catabolic process	GO:0046365	0.48619	1	2	AFLA_125700|AFLA_041410	42	.	0	AFLA_125700|AFLA_041410	2	http://amigo.geneontology.org/cgi-bin/amigo/term_details?term=GO:0046365	no
regulation of cell death	GO:0010941	0.48619	1	2	AFLA_031780|AFLA_071180	42	.	0	AFLA_031780|AFLA_071180	2	http://amigo.geneontology.org/cgi-bin/amigo/term_details?term=GO:0010941	no
establishment of vesicle localization	GO:0051650	0.48816	1	1	AFLA_069190	17	AFLA_069190	1	.	0	http://amigo.geneontology.org/cgi-bin/amigo/term_details?term=GO:0051650	no
regulation of cell development	GO:0060284	0.48816	1	1	AFLA_075840	17	.	0	AFLA_075840	1	http://amigo.geneontology.org/cgi-bin/amigo/term_details?term=GO:0060284	no
positive regulation of GTPase activity	GO:0043547	0.48816	1	1	AFLA_102850	17	AFLA_102850	1	.	0	http://amigo.geneontology.org/cgi-bin/amigo/term_details?term=GO:0043547	no
response to hydrogen peroxide	GO:0042542	0.48816	1	1	AFLA_030430	17	.	0	AFLA_030430	1	http://amigo.geneontology.org/cgi-bin/amigo/term_details?term=GO:0042542	no
cell wall assembly	GO:0070726	0.48816	1	1	AFLA_066700	17	.	0	AFLA_066700	1	http://amigo.geneontology.org/cgi-bin/amigo/term_details?term=GO:0070726	no
regulation of carbohydrate biosynthetic process	GO:0043255	0.48816	1	1	AFLA_075840	17	.	0	AFLA_075840	1	http://amigo.geneontology.org/cgi-bin/amigo/term_details?term=GO:0043255	no
hemopoiesis	GO:0030097	0.48816	1	1	AFLA_138560	17	AFLA_138560	1	.	0	http://amigo.geneontology.org/cgi-bin/amigo/term_details?term=GO:0030097	no
cellular response to hydrogen peroxide	GO:0070301	0.48816	1	1	AFLA_030430	17	.	0	AFLA_030430	1	http://amigo.geneontology.org/cgi-bin/amigo/term_details?term=GO:0070301	no
positive regulation of ion transport	GO:0043270	0.48816	1	1	AFLA_038590	17	AFLA_038590	1	.	0	http://amigo.geneontology.org/cgi-bin/amigo/term_details?term=GO:0043270	no
pyrimidine ribonucleotide metabolic process	GO:0009218	0.48816	1	1	AFLA_001850	17	AFLA_001850	1	.	0	http://amigo.geneontology.org/cgi-bin/amigo/term_details?term=GO:0009218	no
hematopoietic or lymphoid organ development	GO:0048534	0.48816	1	1	AFLA_138560	17	AFLA_138560	1	.	0	http://amigo.geneontology.org/cgi-bin/amigo/term_details?term=GO:0048534	no
pyrimidine ribonucleotide biosynthetic process	GO:0009220	0.48816	1	1	AFLA_001850	17	AFLA_001850	1	.	0	http://amigo.geneontology.org/cgi-bin/amigo/term_details?term=GO:0009220	no
pyrimidine ribonucleoside biosynthetic process	GO:0046132	0.48816	1	1	AFLA_001850	17	AFLA_001850	1	.	0	http://amigo.geneontology.org/cgi-bin/amigo/term_details?term=GO:0046132	no
iron-sulfur cluster assembly	GO:0016226	0.48816	1	1	AFLA_027970	17	AFLA_027970	1	.	0	http://amigo.geneontology.org/cgi-bin/amigo/term_details?term=GO:0016226	no
ubiquinone metabolic process	GO:0006743	0.48816	1	1	AFLA_103000	17	AFLA_103000	1	.	0	http://amigo.geneontology.org/cgi-bin/amigo/term_details?term=GO:0006743	no
ubiquinone biosynthetic process	GO:0006744	0.48816	1	1	AFLA_103000	17	AFLA_103000	1	.	0	http://amigo.geneontology.org/cgi-bin/amigo/term_details?term=GO:0006744	no
metallo-sulfur cluster assembly	GO:0031163	0.48816	1	1	AFLA_027970	17	AFLA_027970	1	.	0	http://amigo.geneontology.org/cgi-bin/amigo/term_details?term=GO:0031163	no
regulation of vesicle fusion	GO:0031338	0.48816	1	1	AFLA_056120	17	AFLA_056120	1	.	0	http://amigo.geneontology.org/cgi-bin/amigo/term_details?term=GO:0031338	no
central nervous system development	GO:0007417	0.48816	1	1	AFLA_028740	17	AFLA_028740	1	.	0	http://amigo.geneontology.org/cgi-bin/amigo/term_details?term=GO:0007417	no
response to cadmium ion	GO:0046686	0.48816	1	1	AFLA_126510	17	.	0	AFLA_126510	1	http://amigo.geneontology.org/cgi-bin/amigo/term_details?term=GO:0046686	no
carbohydrate transport	GO:0008643	0.48831	1	5	AFLA_106750|AFLA_080990|AFLA_043090|AFLA_097330|AFLA_131830	119	.	0	AFLA_106750|AFLA_080990|AFLA_043090|AFLA_097330|AFLA_131830	5	http://amigo.geneontology.org/cgi-bin/amigo/term_details?term=GO:0008643	no
response to osmotic stress	GO:0006970	0.49134	1	3	AFLA_075860|AFLA_098430|AFLA_068440	68	AFLA_075860|AFLA_068440	2	AFLA_098430	1	http://amigo.geneontology.org/cgi-bin/amigo/term_details?term=GO:0006970	no
response to oxygen-containing compound	GO:1901700	0.494	1	4	AFLA_028740|AFLA_030430|AFLA_009750|AFLA_071180	94	AFLA_028740	1	AFLA_030430|AFLA_009750|AFLA_071180	3	http://amigo.geneontology.org/cgi-bin/amigo/term_details?term=GO:1901700	no
actin filament organization	GO:0007015	0.4987	1	2	AFLA_052640|AFLA_089900	43	AFLA_052640	1	AFLA_089900	1	http://amigo.geneontology.org/cgi-bin/amigo/term_details?term=GO:0007015	no
vacuole organization	GO:0007033	0.4987	1	2	AFLA_056120|AFLA_003270	43	AFLA_056120|AFLA_003270	2	.	0	http://amigo.geneontology.org/cgi-bin/amigo/term_details?term=GO:0007033	no
cellular amide metabolic process	GO:0043603	0.50313	1	5	AFLA_024750|AFLA_035970|AFLA_063160|AFLA_003810|AFLA_137760	121	AFLA_035970|AFLA_003810|AFLA_137760	3	AFLA_024750|AFLA_063160	2	http://amigo.geneontology.org/cgi-bin/amigo/term_details?term=GO:0043603	no
transport	GO:0006810	0.50603	1	58	AFLA_024520|AFLA_024810|AFLA_028740|AFLA_124130|AFLA_032450|AFLA_034340|AFLA_124230|AFLA_106750|AFLA_052640|AFLA_110050|AFLA_112960|AFLA_056120|AFLA_059480|AFLA_007610|AFLA_008850|AFLA_009750|AFLA_075840|AFLA_075860|AFLA_077030|AFLA_078270|AFLA_080990|AFLA_082760|AFLA_083400|AFLA_126510|AFLA_089900|AFLA_091020|AFLA_095670|AFLA_018740|AFLA_019060|AFLA_038580|AFLA_038590|AFLA_039360|AFLA_040450|AFL…	1495	AFLA_028740|AFLA_052640|AFLA_112960|AFLA_056120|AFLA_007610|AFLA_008850|AFLA_075860|AFLA_078270|AFLA_083400|AFLA_038580|AFLA_038590|AFLA_039360|AFLA_129430|AFLA_045770|AFLA_045960|AFLA_046070|AFLA_046150|AFLA_098090|AFLA_098330|AFLA_068440|AFLA_069190|AFLA_003050|AFLA_003220|AFLA_003810|AFLA_137060	25	AFLA_024520|AFLA_024810|AFLA_124130|AFLA_032450|AFLA_034340|AFLA_124230|AFLA_106750|AFLA_110050|AFLA_059480|AFLA_009750|AFLA_075840|AFLA_077030|AFLA_080990|AFLA_082760|AFLA_126510|AFLA_089900|AFLA_091020|AFLA_095670|AFLA_018740|AFLA_019060|AFLA_040450|AFLA_043090|AFLA_047300|AFLA_097330|AFLA_097710|AFLA_098430|AFLA_064430|AFLA_069320|AFLA_070950|AFLA_003980|AFLA_131830|AFLA_050180|AFLA_138640	33	http://amigo.geneontology.org/cgi-bin/amigo/term_details?term=GO:0006810	no
positive regulation of cell adhesion	GO:0045785	0.50796	1	1	AFLA_075840	18	.	0	AFLA_075840	1	http://amigo.geneontology.org/cgi-bin/amigo/term_details?term=GO:0045785	no
pyrimidine nucleoside monophosphate metabolic process	GO:0009129	0.50796	1	1	AFLA_001850	18	AFLA_001850	1	.	0	http://amigo.geneontology.org/cgi-bin/amigo/term_details?term=GO:0009129	no
response to growth factor	GO:0070848	0.50796	1	1	AFLA_075840	18	.	0	AFLA_075840	1	http://amigo.geneontology.org/cgi-bin/amigo/term_details?term=GO:0070848	no
pyrimidine nucleoside monophosphate biosynthetic process	GO:0009130	0.50796	1	1	AFLA_001850	18	AFLA_001850	1	.	0	http://amigo.geneontology.org/cgi-bin/amigo/term_details?term=GO:0009130	no
vesicle localization	GO:0051648	0.50796	1	1	AFLA_069190	18	AFLA_069190	1	.	0	http://amigo.geneontology.org/cgi-bin/amigo/term_details?term=GO:0051648	no
late endosome to vacuole transport	GO:0045324	0.50796	1	1	AFLA_047300	18	.	0	AFLA_047300	1	http://amigo.geneontology.org/cgi-bin/amigo/term_details?term=GO:0045324	no
cellular response to growth factor stimulus	GO:0071363	0.50796	1	1	AFLA_075840	18	.	0	AFLA_075840	1	http://amigo.geneontology.org/cgi-bin/amigo/term_details?term=GO:0071363	no
xenobiotic metabolic process	GO:0006805	0.50796	1	1	AFLA_024750	18	.	0	AFLA_024750	1	http://amigo.geneontology.org/cgi-bin/amigo/term_details?term=GO:0006805	no
pyrimidine nucleoside biosynthetic process	GO:0046134	0.50796	1	1	AFLA_001850	18	AFLA_001850	1	.	0	http://amigo.geneontology.org/cgi-bin/amigo/term_details?term=GO:0046134	no
pentose catabolic process	GO:0019323	0.50796	1	1	AFLA_125700	18	.	0	AFLA_125700	1	http://amigo.geneontology.org/cgi-bin/amigo/term_details?term=GO:0019323	no
regulation of defense response	GO:0031347	0.50796	1	1	AFLA_071180	18	.	0	AFLA_071180	1	http://amigo.geneontology.org/cgi-bin/amigo/term_details?term=GO:0031347	no
budding cell bud growth	GO:0007117	0.50796	1	1	AFLA_011230	18	AFLA_011230	1	.	0	http://amigo.geneontology.org/cgi-bin/amigo/term_details?term=GO:0007117	no
positive regulation of multicellular organismal process	GO:0051240	0.50796	1	1	AFLA_071180	18	.	0	AFLA_071180	1	http://amigo.geneontology.org/cgi-bin/amigo/term_details?term=GO:0051240	no
aldehyde catabolic process	GO:0046185	0.50796	1	1	AFLA_063160	18	.	0	AFLA_063160	1	http://amigo.geneontology.org/cgi-bin/amigo/term_details?term=GO:0046185	no
folic acid-containing compound metabolic process	GO:0006760	0.50796	1	1	AFLA_047080	18	AFLA_047080	1	.	0	http://amigo.geneontology.org/cgi-bin/amigo/term_details?term=GO:0006760	no
sorocarp development	GO:0030587	0.50796	1	1	AFLA_019060	18	.	0	AFLA_019060	1	http://amigo.geneontology.org/cgi-bin/amigo/term_details?term=GO:0030587	no
cell aging	GO:0007569	0.50796	1	1	AFLA_036440	18	.	0	AFLA_036440	1	http://amigo.geneontology.org/cgi-bin/amigo/term_details?term=GO:0007569	no
developmental growth involved in morphogenesis	GO:0060560	0.50796	1	1	AFLA_131330	18	AFLA_131330	1	.	0	http://amigo.geneontology.org/cgi-bin/amigo/term_details?term=GO:0060560	no
regulation of cellular amino acid metabolic process	GO:0006521	0.50796	1	1	AFLA_014490	18	AFLA_014490	1	.	0	http://amigo.geneontology.org/cgi-bin/amigo/term_details?term=GO:0006521	no
cellulose catabolic process	GO:0030245	0.51101	1	2	AFLA_063040|AFLA_087870	44	AFLA_087870	1	AFLA_063040	1	http://amigo.geneontology.org/cgi-bin/amigo/term_details?term=GO:0030245	no
cellular aldehyde metabolic process	GO:0006081	0.51101	1	2	AFLA_063160|AFLA_049390	44	.	0	AFLA_063160|AFLA_049390	2	http://amigo.geneontology.org/cgi-bin/amigo/term_details?term=GO:0006081	no
regulation of multicellular organismal development	GO:2000026	0.51101	1	2	AFLA_099280|AFLA_071180	44	.	0	AFLA_099280|AFLA_071180	2	http://amigo.geneontology.org/cgi-bin/amigo/term_details?term=GO:2000026	no
cellular amino acid biosynthetic process	GO:0008652	0.5159	1	9	AFLA_036440|AFLA_110930|AFLA_060530|AFLA_079230|AFLA_084230|AFLA_021700|AFLA_041430|AFLA_066210|AFLA_134090	227	AFLA_134090	1	AFLA_036440|AFLA_110930|AFLA_060530|AFLA_079230|AFLA_084230|AFLA_021700|AFLA_041430|AFLA_066210	8	http://amigo.geneontology.org/cgi-bin/amigo/term_details?term=GO:0008652	no
single-organism carbohydrate metabolic process	GO:0044723	0.51991	1	13	AFLA_035030|AFLA_110340|AFLA_112010|AFLA_075840|AFLA_125700|AFLA_122210|AFLA_093790|AFLA_041410|AFLA_042390|AFLA_044400|AFLA_101470|AFLA_065130|AFLA_049390	332	AFLA_035030|AFLA_110340|AFLA_112010|AFLA_042390|AFLA_101470	5	AFLA_075840|AFLA_125700|AFLA_122210|AFLA_093790|AFLA_041410|AFLA_044400|AFLA_065130|AFLA_049390	8	http://amigo.geneontology.org/cgi-bin/amigo/term_details?term=GO:0044723	no
establishment of localization	GO:0051234	0.52255	1	58	AFLA_024520|AFLA_024810|AFLA_028740|AFLA_124130|AFLA_032450|AFLA_034340|AFLA_124230|AFLA_106750|AFLA_052640|AFLA_110050|AFLA_112960|AFLA_056120|AFLA_059480|AFLA_007610|AFLA_008850|AFLA_009750|AFLA_075840|AFLA_075860|AFLA_077030|AFLA_078270|AFLA_080990|AFLA_082760|AFLA_083400|AFLA_126510|AFLA_089900|AFLA_091020|AFLA_095670|AFLA_018740|AFLA_019060|AFLA_038580|AFLA_038590|AFLA_039360|AFLA_040450|AFL…	1502	AFLA_028740|AFLA_052640|AFLA_112960|AFLA_056120|AFLA_007610|AFLA_008850|AFLA_075860|AFLA_078270|AFLA_083400|AFLA_038580|AFLA_038590|AFLA_039360|AFLA_129430|AFLA_045770|AFLA_045960|AFLA_046070|AFLA_046150|AFLA_098090|AFLA_098330|AFLA_068440|AFLA_069190|AFLA_003050|AFLA_003220|AFLA_003810|AFLA_137060	25	AFLA_024520|AFLA_024810|AFLA_124130|AFLA_032450|AFLA_034340|AFLA_124230|AFLA_106750|AFLA_110050|AFLA_059480|AFLA_009750|AFLA_075840|AFLA_077030|AFLA_080990|AFLA_082760|AFLA_126510|AFLA_089900|AFLA_091020|AFLA_095670|AFLA_018740|AFLA_019060|AFLA_040450|AFLA_043090|AFLA_047300|AFLA_097330|AFLA_097710|AFLA_098430|AFLA_064430|AFLA_069320|AFLA_070950|AFLA_003980|AFLA_131830|AFLA_050180|AFLA_138640	33	http://amigo.geneontology.org/cgi-bin/amigo/term_details?term=GO:0051234	no
beta-glucan catabolic process	GO:0051275	0.52312	1	2	AFLA_063040|AFLA_087870	45	AFLA_087870	1	AFLA_063040	1	http://amigo.geneontology.org/cgi-bin/amigo/term_details?term=GO:0051275	no
hemicellulose metabolic process	GO:0010410	0.52312	1	2	AFLA_063680|AFLA_081980	45	.	0	AFLA_063680|AFLA_081980	2	http://amigo.geneontology.org/cgi-bin/amigo/term_details?term=GO:0010410	no
fatty acid beta-oxidation using acyl-CoA dehydrogenase	GO:0033539	0.527	1	1	AFLA_099270	19	.	0	AFLA_099270	1	http://amigo.geneontology.org/cgi-bin/amigo/term_details?term=GO:0033539	no
cell morphogenesis involved in differentiation	GO:0000904	0.527	1	1	AFLA_075840	19	.	0	AFLA_075840	1	http://amigo.geneontology.org/cgi-bin/amigo/term_details?term=GO:0000904	no
cellular response to xenobiotic stimulus	GO:0071466	0.527	1	1	AFLA_024750	19	.	0	AFLA_024750	1	http://amigo.geneontology.org/cgi-bin/amigo/term_details?term=GO:0071466	no
negative regulation of nuclear division	GO:0051784	0.527	1	1	AFLA_047300	19	.	0	AFLA_047300	1	http://amigo.geneontology.org/cgi-bin/amigo/term_details?term=GO:0051784	no
pyrimidine ribonucleoside metabolic process	GO:0046131	0.527	1	1	AFLA_001850	19	AFLA_001850	1	.	0	http://amigo.geneontology.org/cgi-bin/amigo/term_details?term=GO:0046131	no
pyrimidine nucleoside metabolic process	GO:0006213	0.527	1	1	AFLA_001850	19	AFLA_001850	1	.	0	http://amigo.geneontology.org/cgi-bin/amigo/term_details?term=GO:0006213	no
cytochrome complex assembly	GO:0017004	0.527	1	1	AFLA_005180	19	.	0	AFLA_005180	1	http://amigo.geneontology.org/cgi-bin/amigo/term_details?term=GO:0017004	no
cellulose metabolic process	GO:0030243	0.53502	1	2	AFLA_063040|AFLA_087870	46	AFLA_087870	1	AFLA_063040	1	http://amigo.geneontology.org/cgi-bin/amigo/term_details?term=GO:0030243	no
fatty acid beta-oxidation	GO:0006635	0.53502	1	2	AFLA_073320|AFLA_099270	46	AFLA_073320	1	AFLA_099270	1	http://amigo.geneontology.org/cgi-bin/amigo/term_details?term=GO:0006635	no
biosynthetic process	GO:0009058	0.53601	1	92	AFLA_023420|AFLA_024750|AFLA_050800|AFLA_026100|AFLA_027970|AFLA_030140|AFLA_030250|AFLA_030430|AFLA_031780|AFLA_034340|AFLA_035030|AFLA_036110|AFLA_036440|AFLA_106350|AFLA_107840|AFLA_108930|AFLA_109820|AFLA_110340|AFLA_110890|AFLA_110930|AFLA_111980|AFLA_112010|AFLA_112090|AFLA_054760|AFLA_056250|AFLA_057710|AFLA_058760|AFLA_060530|AFLA_060700|AFLA_063420|AFLA_012050|AFLA_012080|AFLA_073340|AFL…	2390	AFLA_026100|AFLA_027970|AFLA_030250|AFLA_035030|AFLA_106350|AFLA_108930|AFLA_110340|AFLA_110890|AFLA_112010|AFLA_073340|AFLA_077580|AFLA_085740|AFLA_086100|AFLA_116430|AFLA_119710|AFLA_122560|AFLA_122570|AFLA_093230|AFLA_128330|AFLA_014490|AFLA_045770|AFLA_103000|AFLA_065570|AFLA_065850|AFLA_066620|AFLA_001850|AFLA_003220|AFLA_003270|AFLA_131330|AFLA_134090|AFLA_050300|AFLA_137200|AFLA_138560	33	AFLA_023420|AFLA_024750|AFLA_050800|AFLA_030140|AFLA_030430|AFLA_031780|AFLA_034340|AFLA_036110|AFLA_036440|AFLA_107840|AFLA_109820|AFLA_110930|AFLA_111980|AFLA_112090|AFLA_054760|AFLA_056250|AFLA_057710|AFLA_058760|AFLA_060530|AFLA_060700|AFLA_063420|AFLA_012050|AFLA_012080|AFLA_075030|AFLA_125270|AFLA_075840|AFLA_079230|AFLA_079880|AFLA_080140|AFLA_082850|AFLA_084230|AFLA_123350|AFLA_118100|AFL…	59	http://amigo.geneontology.org/cgi-bin/amigo/term_details?term=GO:0009058	no
regulation of developmental process	GO:0050793	0.53942	1	5	AFLA_073340|AFLA_075840|AFLA_123350|AFLA_099280|AFLA_071180	126	AFLA_073340	1	AFLA_075840|AFLA_123350|AFLA_099280|AFLA_071180	4	http://amigo.geneontology.org/cgi-bin/amigo/term_details?term=GO:0050793	no
fatty acid derivative metabolic process	GO:1901568	0.5453	1	1	AFLA_030430	20	.	0	AFLA_030430	1	http://amigo.geneontology.org/cgi-bin/amigo/term_details?term=GO:1901568	no
positive regulation of protein phosphorylation	GO:0001934	0.5453	1	1	AFLA_034340	20	.	0	AFLA_034340	1	http://amigo.geneontology.org/cgi-bin/amigo/term_details?term=GO:0001934	no
iron ion transport	GO:0006826	0.5453	1	1	AFLA_050180	20	.	0	AFLA_050180	1	http://amigo.geneontology.org/cgi-bin/amigo/term_details?term=GO:0006826	no
regulation of metaphase/anaphase transition of cell cycle	GO:1902099	0.5453	1	1	AFLA_047300	20	.	0	AFLA_047300	1	http://amigo.geneontology.org/cgi-bin/amigo/term_details?term=GO:1902099	no
positive regulation of translation	GO:0045727	0.5453	1	1	AFLA_101160	20	.	0	AFLA_101160	1	http://amigo.geneontology.org/cgi-bin/amigo/term_details?term=GO:0045727	no
reactive oxygen species metabolic process	GO:0072593	0.5453	1	1	AFLA_030430	20	.	0	AFLA_030430	1	http://amigo.geneontology.org/cgi-bin/amigo/term_details?term=GO:0072593	no
amino-acid betaine biosynthetic process	GO:0006578	0.5453	1	1	AFLA_079230	20	.	0	AFLA_079230	1	http://amigo.geneontology.org/cgi-bin/amigo/term_details?term=GO:0006578	no
regulation of mitotic metaphase/anaphase transition	GO:0030071	0.5453	1	1	AFLA_047300	20	.	0	AFLA_047300	1	http://amigo.geneontology.org/cgi-bin/amigo/term_details?term=GO:0030071	no
nucleobase catabolic process	GO:0046113	0.5453	1	1	AFLA_023420	20	.	0	AFLA_023420	1	http://amigo.geneontology.org/cgi-bin/amigo/term_details?term=GO:0046113	no
icosanoid metabolic process	GO:0006690	0.5453	1	1	AFLA_030430	20	.	0	AFLA_030430	1	http://amigo.geneontology.org/cgi-bin/amigo/term_details?term=GO:0006690	no
one-carbon metabolic process	GO:0006730	0.5453	1	1	AFLA_047080	20	AFLA_047080	1	.	0	http://amigo.geneontology.org/cgi-bin/amigo/term_details?term=GO:0006730	no
metaphase/anaphase transition of cell cycle	GO:0044784	0.5453	1	1	AFLA_047300	20	.	0	AFLA_047300	1	http://amigo.geneontology.org/cgi-bin/amigo/term_details?term=GO:0044784	no
intra-Golgi vesicle-mediated transport	GO:0006891	0.5453	1	1	AFLA_069190	20	AFLA_069190	1	.	0	http://amigo.geneontology.org/cgi-bin/amigo/term_details?term=GO:0006891	no
metaphase/anaphase transition of mitotic cell cycle	GO:0007091	0.5453	1	1	AFLA_047300	20	.	0	AFLA_047300	1	http://amigo.geneontology.org/cgi-bin/amigo/term_details?term=GO:0007091	no
vitamin transport	GO:0051180	0.5453	1	1	AFLA_097710	20	.	0	AFLA_097710	1	http://amigo.geneontology.org/cgi-bin/amigo/term_details?term=GO:0051180	no
regulation of cell adhesion	GO:0030155	0.5453	1	1	AFLA_075840	20	.	0	AFLA_075840	1	http://amigo.geneontology.org/cgi-bin/amigo/term_details?term=GO:0030155	no
tRNA modification	GO:0006400	0.54673	1	2	AFLA_033330|AFLA_093230	47	AFLA_093230	1	AFLA_033330	1	http://amigo.geneontology.org/cgi-bin/amigo/term_details?term=GO:0006400	no
cellular response to chemical stimulus	GO:0070887	0.5511	1	13	AFLA_024750|AFLA_028740|AFLA_030430|AFLA_109820|AFLA_075840|AFLA_085740|AFLA_122570|AFLA_098430|AFLA_003220|AFLA_003810|AFLA_131330|AFLA_050180|AFLA_050300	339	AFLA_028740|AFLA_085740|AFLA_122570|AFLA_003220|AFLA_003810|AFLA_131330|AFLA_050300	7	AFLA_024750|AFLA_030430|AFLA_109820|AFLA_075840|AFLA_098430|AFLA_050180	6	http://amigo.geneontology.org/cgi-bin/amigo/term_details?term=GO:0070887	no
ion transport	GO:0006811	0.55279	1	19	AFLA_024520|AFLA_032450|AFLA_110050|AFLA_112960|AFLA_075860|AFLA_082760|AFLA_126510|AFLA_018740|AFLA_038590|AFLA_040450|AFLA_129430|AFLA_045770|AFLA_045960|AFLA_046150|AFLA_097710|AFLA_068440|AFLA_003980|AFLA_050180|AFLA_138640	497	AFLA_112960|AFLA_075860|AFLA_038590|AFLA_129430|AFLA_045770|AFLA_045960|AFLA_046150|AFLA_068440	8	AFLA_024520|AFLA_032450|AFLA_110050|AFLA_082760|AFLA_126510|AFLA_018740|AFLA_040450|AFLA_097710|AFLA_003980|AFLA_050180|AFLA_138640	11	http://amigo.geneontology.org/cgi-bin/amigo/term_details?term=GO:0006811	no
cellular response to abiotic stimulus	GO:0071214	0.55785	1	3	AFLA_075860|AFLA_065850|AFLA_068440	75	AFLA_075860|AFLA_065850|AFLA_068440	3	.	0	http://amigo.geneontology.org/cgi-bin/amigo/term_details?term=GO:0071214	no
cellular response to osmotic stress	GO:0071470	0.55822	1	2	AFLA_075860|AFLA_068440	48	AFLA_075860|AFLA_068440	2	.	0	http://amigo.geneontology.org/cgi-bin/amigo/term_details?term=GO:0071470	no
lipid oxidation	GO:0034440	0.55822	1	2	AFLA_073320|AFLA_099270	48	AFLA_073320	1	AFLA_099270	1	http://amigo.geneontology.org/cgi-bin/amigo/term_details?term=GO:0034440	no
fatty acid oxidation	GO:0019395	0.55822	1	2	AFLA_073320|AFLA_099270	48	AFLA_073320	1	AFLA_099270	1	http://amigo.geneontology.org/cgi-bin/amigo/term_details?term=GO:0019395	no
positive regulation of hydrolase activity	GO:0051345	0.5629	1	1	AFLA_102850	21	AFLA_102850	1	.	0	http://amigo.geneontology.org/cgi-bin/amigo/term_details?term=GO:0051345	no
response to salt stress	GO:0009651	0.5629	1	1	AFLA_068440	21	AFLA_068440	1	.	0	http://amigo.geneontology.org/cgi-bin/amigo/term_details?term=GO:0009651	no
cellular response to lipid	GO:0071396	0.5629	1	1	AFLA_003810	21	AFLA_003810	1	.	0	http://amigo.geneontology.org/cgi-bin/amigo/term_details?term=GO:0071396	no
regulation of cell growth	GO:0001558	0.5629	1	1	AFLA_052640	21	AFLA_052640	1	.	0	http://amigo.geneontology.org/cgi-bin/amigo/term_details?term=GO:0001558	no
hexose catabolic process	GO:0019320	0.5629	1	1	AFLA_041410	21	.	0	AFLA_041410	1	http://amigo.geneontology.org/cgi-bin/amigo/term_details?term=GO:0019320	no
macroautophagy	GO:0016236	0.5629	1	1	AFLA_056250	21	.	0	AFLA_056250	1	http://amigo.geneontology.org/cgi-bin/amigo/term_details?term=GO:0016236	no
cell-substrate adhesion	GO:0031589	0.5629	1	1	AFLA_075840	21	.	0	AFLA_075840	1	http://amigo.geneontology.org/cgi-bin/amigo/term_details?term=GO:0031589	no
response to abiotic stimulus	GO:0009628	0.5646	1	7	AFLA_061280|AFLA_009750|AFLA_075860|AFLA_098430|AFLA_065850|AFLA_068440|AFLA_137780	183	AFLA_075860|AFLA_065850|AFLA_068440	3	AFLA_061280|AFLA_009750|AFLA_098430|AFLA_137780	4	http://amigo.geneontology.org/cgi-bin/amigo/term_details?term=GO:0009628	no
cellular glucan metabolic process	GO:0006073	0.57588	1	3	AFLA_023490|AFLA_063040|AFLA_087870	77	AFLA_023490|AFLA_087870	2	AFLA_063040	1	http://amigo.geneontology.org/cgi-bin/amigo/term_details?term=GO:0006073	no
response to chemical	GO:0042221	0.57838	1	19	AFLA_024750|AFLA_028740|AFLA_030430|AFLA_109820|AFLA_009750|AFLA_075840|AFLA_085740|AFLA_126510|AFLA_122570|AFLA_018740|AFLA_039360|AFLA_098430|AFLA_071180|AFLA_003220|AFLA_003810|AFLA_003980|AFLA_131330|AFLA_050180|AFLA_050300	504	AFLA_028740|AFLA_085740|AFLA_122570|AFLA_039360|AFLA_003220|AFLA_003810|AFLA_131330|AFLA_050300	8	AFLA_024750|AFLA_030430|AFLA_109820|AFLA_009750|AFLA_075840|AFLA_126510|AFLA_018740|AFLA_098430|AFLA_071180|AFLA_003980|AFLA_050180	11	http://amigo.geneontology.org/cgi-bin/amigo/term_details?term=GO:0042221	no
ncRNA processing	GO:0034470	0.57916	1	9	AFLA_033330|AFLA_035340|AFLA_079160|AFLA_091360|AFLA_093230|AFLA_093880|AFLA_044170|AFLA_130100|AFLA_068000	239	AFLA_093230	1	AFLA_033330|AFLA_035340|AFLA_079160|AFLA_091360|AFLA_093880|AFLA_044170|AFLA_130100|AFLA_068000	8	http://amigo.geneontology.org/cgi-bin/amigo/term_details?term=GO:0034470	no
nuclear DNA replication	GO:0033260	0.57982	1	1	AFLA_073340	22	AFLA_073340	1	.	0	http://amigo.geneontology.org/cgi-bin/amigo/term_details?term=GO:0033260	no
cellular response to reactive oxygen species	GO:0034614	0.57982	1	1	AFLA_030430	22	.	0	AFLA_030430	1	http://amigo.geneontology.org/cgi-bin/amigo/term_details?term=GO:0034614	no
protein dephosphorylation	GO:0006470	0.57982	1	1	AFLA_092640	22	AFLA_092640	1	.	0	http://amigo.geneontology.org/cgi-bin/amigo/term_details?term=GO:0006470	no
drug transmembrane transport	GO:0006855	0.57982	1	1	AFLA_039360	22	AFLA_039360	1	.	0	http://amigo.geneontology.org/cgi-bin/amigo/term_details?term=GO:0006855	no
actin polymerization or depolymerization	GO:0008154	0.57982	1	1	AFLA_089900	22	.	0	AFLA_089900	1	http://amigo.geneontology.org/cgi-bin/amigo/term_details?term=GO:0008154	no
nuclear-transcribed mRNA catabolic process, deadenylation-dependent decay	GO:0000288	0.57982	1	1	AFLA_093470	22	AFLA_093470	1	.	0	http://amigo.geneontology.org/cgi-bin/amigo/term_details?term=GO:0000288	no
pigment biosynthetic process	GO:0046148	0.58059	1	2	AFLA_036110|AFLA_125270	50	.	0	AFLA_036110|AFLA_125270	2	http://amigo.geneontology.org/cgi-bin/amigo/term_details?term=GO:0046148	no
positive regulation of transport	GO:0051050	0.58059	1	2	AFLA_028740|AFLA_038590	50	AFLA_028740|AFLA_038590	2	.	0	http://amigo.geneontology.org/cgi-bin/amigo/term_details?term=GO:0051050	no
regulation of transport	GO:0051049	0.5821	1	4	AFLA_028740|AFLA_056120|AFLA_038590|AFLA_069190	105	AFLA_028740|AFLA_056120|AFLA_038590|AFLA_069190	4	.	0	http://amigo.geneontology.org/cgi-bin/amigo/term_details?term=GO:0051049	no
Golgi vesicle transport	GO:0048193	0.5821	1	4	AFLA_089900|AFLA_045960|AFLA_046150|AFLA_069190	105	AFLA_045960|AFLA_046150|AFLA_069190	3	AFLA_089900	1	http://amigo.geneontology.org/cgi-bin/amigo/term_details?term=GO:0048193	no
RNA modification	GO:0009451	0.58472	1	3	AFLA_033330|AFLA_093230|AFLA_001850	78	AFLA_093230|AFLA_001850	2	AFLA_033330	1	http://amigo.geneontology.org/cgi-bin/amigo/term_details?term=GO:0009451	no
polysaccharide metabolic process	GO:0005976	0.58562	1	10	AFLA_023490|AFLA_031380|AFLA_063040|AFLA_063680|AFLA_054470|AFLA_075840|AFLA_081980|AFLA_087870|AFLA_122400|AFLA_070170	267	AFLA_023490|AFLA_031380|AFLA_054470|AFLA_087870	4	AFLA_063040|AFLA_063680|AFLA_075840|AFLA_081980|AFLA_122400|AFLA_070170	6	http://amigo.geneontology.org/cgi-bin/amigo/term_details?term=GO:0005976	no
glucan metabolic process	GO:0044042	0.59344	1	3	AFLA_023490|AFLA_063040|AFLA_087870	79	AFLA_023490|AFLA_087870	2	AFLA_063040	1	http://amigo.geneontology.org/cgi-bin/amigo/term_details?term=GO:0044042	no
actin filament-based process	GO:0030029	0.59344	1	3	AFLA_052640|AFLA_089900|AFLA_038590	79	AFLA_052640|AFLA_038590	2	AFLA_089900	1	http://amigo.geneontology.org/cgi-bin/amigo/term_details?term=GO:0030029	no
pteridine-containing compound metabolic process	GO:0042558	0.59609	1	1	AFLA_047080	23	AFLA_047080	1	.	0	http://amigo.geneontology.org/cgi-bin/amigo/term_details?term=GO:0042558	no
response to light stimulus	GO:0009416	0.59609	1	1	AFLA_065850	23	AFLA_065850	1	.	0	http://amigo.geneontology.org/cgi-bin/amigo/term_details?term=GO:0009416	no
positive regulation of transferase activity	GO:0051347	0.59609	1	1	AFLA_034340	23	.	0	AFLA_034340	1	http://amigo.geneontology.org/cgi-bin/amigo/term_details?term=GO:0051347	no
amino acid transmembrane transport	GO:0003333	0.59609	1	1	AFLA_112960	23	AFLA_112960	1	.	0	http://amigo.geneontology.org/cgi-bin/amigo/term_details?term=GO:0003333	no
RNA phosphodiester bond hydrolysis, endonucleolytic	GO:0090502	0.59609	1	1	AFLA_093880	23	.	0	AFLA_093880	1	http://amigo.geneontology.org/cgi-bin/amigo/term_details?term=GO:0090502	no
ether metabolic process	GO:0018904	0.59609	1	1	AFLA_062260	23	AFLA_062260	1	.	0	http://amigo.geneontology.org/cgi-bin/amigo/term_details?term=GO:0018904	no
regulation of cytokinesis	GO:0032465	0.59609	1	1	AFLA_047300	23	.	0	AFLA_047300	1	http://amigo.geneontology.org/cgi-bin/amigo/term_details?term=GO:0032465	no
cell budding	GO:0007114	0.59609	1	1	AFLA_011230	23	AFLA_011230	1	.	0	http://amigo.geneontology.org/cgi-bin/amigo/term_details?term=GO:0007114	no
cellular protein complex disassembly	GO:0043624	0.59609	1	1	AFLA_089900	23	.	0	AFLA_089900	1	http://amigo.geneontology.org/cgi-bin/amigo/term_details?term=GO:0043624	no
protein localization to chromosome	GO:0034502	0.59609	1	1	AFLA_047300	23	.	0	AFLA_047300	1	http://amigo.geneontology.org/cgi-bin/amigo/term_details?term=GO:0034502	no
mitochondrial respiratory chain complex assembly	GO:0033108	0.59609	1	1	AFLA_005180	23	.	0	AFLA_005180	1	http://amigo.geneontology.org/cgi-bin/amigo/term_details?term=GO:0033108	no
lipid modification	GO:0030258	0.60204	1	3	AFLA_073320|AFLA_099270|AFLA_065130	80	AFLA_073320	1	AFLA_099270|AFLA_065130	2	http://amigo.geneontology.org/cgi-bin/amigo/term_details?term=GO:0030258	no
positive regulation of transcription from RNA polymerase II promoter by a nonfermentable carbon source	GO:0061414	0.60212	1	2	AFLA_085740|AFLA_122570	52	AFLA_085740|AFLA_122570	2	.	0	http://amigo.geneontology.org/cgi-bin/amigo/term_details?term=GO:0061414	no
ergosterol metabolic process	GO:0008204	0.60212	1	2	AFLA_109820|AFLA_119710	52	AFLA_119710	1	AFLA_109820	1	http://amigo.geneontology.org/cgi-bin/amigo/term_details?term=GO:0008204	no
regulation of transcription from RNA polymerase II promoter by a nonfermentable carbon source	GO:0061413	0.60212	1	2	AFLA_085740|AFLA_122570	52	AFLA_085740|AFLA_122570	2	.	0	http://amigo.geneontology.org/cgi-bin/amigo/term_details?term=GO:0061413	no
phytosteroid metabolic process	GO:0016128	0.60212	1	2	AFLA_109820|AFLA_119710	52	AFLA_119710	1	AFLA_109820	1	http://amigo.geneontology.org/cgi-bin/amigo/term_details?term=GO:0016128	no
lipid transport	GO:0006869	0.60212	1	2	AFLA_046150|AFLA_003050	52	AFLA_046150|AFLA_003050	2	.	0	http://amigo.geneontology.org/cgi-bin/amigo/term_details?term=GO:0006869	no
cellular alcohol metabolic process	GO:0044107	0.60212	1	2	AFLA_109820|AFLA_119710	52	AFLA_119710	1	AFLA_109820	1	http://amigo.geneontology.org/cgi-bin/amigo/term_details?term=GO:0044107	no
pigment metabolic process	GO:0042440	0.60212	1	2	AFLA_036110|AFLA_125270	52	.	0	AFLA_036110|AFLA_125270	2	http://amigo.geneontology.org/cgi-bin/amigo/term_details?term=GO:0042440	no
organic anion transport	GO:0015711	0.60483	1	7	AFLA_112960|AFLA_075860|AFLA_040450|AFLA_045770|AFLA_046150|AFLA_097710|AFLA_138640	190	AFLA_112960|AFLA_075860|AFLA_045770|AFLA_046150	4	AFLA_040450|AFLA_097710|AFLA_138640	3	http://amigo.geneontology.org/cgi-bin/amigo/term_details?term=GO:0015711	no
regulation of signaling	GO:0023051	0.60805	1	5	AFLA_028740|AFLA_093230|AFLA_038590|AFLA_102850|AFLA_068440	136	AFLA_028740|AFLA_093230|AFLA_038590|AFLA_102850|AFLA_068440	5	.	0	http://amigo.geneontology.org/cgi-bin/amigo/term_details?term=GO:0023051	no
tRNA processing	GO:0008033	0.61053	1	3	AFLA_033330|AFLA_091360|AFLA_093230	81	AFLA_093230	1	AFLA_033330|AFLA_091360	2	http://amigo.geneontology.org/cgi-bin/amigo/term_details?term=GO:0008033	no
regulation of cellular amine metabolic process	GO:0033238	0.61173	1	1	AFLA_014490	24	AFLA_014490	1	.	0	http://amigo.geneontology.org/cgi-bin/amigo/term_details?term=GO:0033238	no
epithelium development	GO:0060429	0.61173	1	1	AFLA_110340	24	AFLA_110340	1	.	0	http://amigo.geneontology.org/cgi-bin/amigo/term_details?term=GO:0060429	no
chromatin silencing at centromere	GO:0030702	0.61173	1	1	AFLA_093880	24	.	0	AFLA_093880	1	http://amigo.geneontology.org/cgi-bin/amigo/term_details?term=GO:0030702	no
response to reactive oxygen species	GO:0000302	0.61173	1	1	AFLA_030430	24	.	0	AFLA_030430	1	http://amigo.geneontology.org/cgi-bin/amigo/term_details?term=GO:0000302	no
rRNA processing	GO:0006364	0.61193	1	6	AFLA_035340|AFLA_079160|AFLA_093880|AFLA_044170|AFLA_130100|AFLA_068000	164	.	0	AFLA_035340|AFLA_079160|AFLA_093880|AFLA_044170|AFLA_130100|AFLA_068000	6	http://amigo.geneontology.org/cgi-bin/amigo/term_details?term=GO:0006364	no
establishment of organelle localization	GO:0051656	0.61257	1	2	AFLA_098430|AFLA_069190	53	AFLA_069190	1	AFLA_098430	1	http://amigo.geneontology.org/cgi-bin/amigo/term_details?term=GO:0051656	no
nuclear export	GO:0051168	0.61257	1	2	AFLA_034340|AFLA_098430	53	.	0	AFLA_034340|AFLA_098430	2	http://amigo.geneontology.org/cgi-bin/amigo/term_details?term=GO:0051168	no
modified amino acid transport	GO:0072337	0.61257	1	2	AFLA_040450|AFLA_138640	53	.	0	AFLA_040450|AFLA_138640	2	http://amigo.geneontology.org/cgi-bin/amigo/term_details?term=GO:0072337	no
response to nutrient	GO:0007584	0.61889	1	3	AFLA_028740|AFLA_085740|AFLA_122570	82	AFLA_028740|AFLA_085740|AFLA_122570	3	.	0	http://amigo.geneontology.org/cgi-bin/amigo/term_details?term=GO:0007584	no
cellular carbohydrate metabolic process	GO:0044262	0.62518	1	8	AFLA_023490|AFLA_063040|AFLA_075840|AFLA_087870|AFLA_122210|AFLA_093790|AFLA_044400|AFLA_049390	221	AFLA_023490|AFLA_087870	2	AFLA_063040|AFLA_075840|AFLA_122210|AFLA_093790|AFLA_044400|AFLA_049390	6	http://amigo.geneontology.org/cgi-bin/amigo/term_details?term=GO:0044262	no
regulation of carbohydrate metabolic process	GO:0006109	0.62677	1	1	AFLA_075840	25	.	0	AFLA_075840	1	http://amigo.geneontology.org/cgi-bin/amigo/term_details?term=GO:0006109	no
aging	GO:0007568	0.62677	1	1	AFLA_036440	25	.	0	AFLA_036440	1	http://amigo.geneontology.org/cgi-bin/amigo/term_details?term=GO:0007568	no
negative regulation of intracellular signal transduction	GO:1902532	0.62677	1	1	AFLA_102850	25	AFLA_102850	1	.	0	http://amigo.geneontology.org/cgi-bin/amigo/term_details?term=GO:1902532	no
regulation of immune system process	GO:0002682	0.62677	1	1	AFLA_071180	25	.	0	AFLA_071180	1	http://amigo.geneontology.org/cgi-bin/amigo/term_details?term=GO:0002682	no
cleavage involved in rRNA processing	GO:0000469	0.62677	1	1	AFLA_093880	25	.	0	AFLA_093880	1	http://amigo.geneontology.org/cgi-bin/amigo/term_details?term=GO:0000469	no
aspartate family amino acid catabolic process	GO:0009068	0.62677	1	1	AFLA_005130	25	.	0	AFLA_005130	1	http://amigo.geneontology.org/cgi-bin/amigo/term_details?term=GO:0009068	no
response to biotic stimulus	GO:0009607	0.63284	1	2	AFLA_097650|AFLA_071180	55	AFLA_097650	1	AFLA_071180	1	http://amigo.geneontology.org/cgi-bin/amigo/term_details?term=GO:0009607	no
cellular polysaccharide metabolic process	GO:0044264	0.63336	1	4	AFLA_023490|AFLA_063040|AFLA_075840|AFLA_087870	112	AFLA_023490|AFLA_087870	2	AFLA_063040|AFLA_075840	2	http://amigo.geneontology.org/cgi-bin/amigo/term_details?term=GO:0044264	no
cellular modified amino acid metabolic process	GO:0006575	0.63336	1	4	AFLA_035970|AFLA_079230|AFLA_047080|AFLA_071180	112	AFLA_035970|AFLA_047080	2	AFLA_079230|AFLA_071180	2	http://amigo.geneontology.org/cgi-bin/amigo/term_details?term=GO:0006575	no
rRNA metabolic process	GO:0016072	0.63544	1	6	AFLA_035340|AFLA_079160|AFLA_093880|AFLA_044170|AFLA_130100|AFLA_068000	168	.	0	AFLA_035340|AFLA_079160|AFLA_093880|AFLA_044170|AFLA_130100|AFLA_068000	6	http://amigo.geneontology.org/cgi-bin/amigo/term_details?term=GO:0016072	no
multi-organism reproductive process	GO:0044703	0.64009	1	5	AFLA_066700|AFLA_071180|AFLA_003220|AFLA_050300|AFLA_137060	141	AFLA_003220|AFLA_050300|AFLA_137060	3	AFLA_066700|AFLA_071180	2	http://amigo.geneontology.org/cgi-bin/amigo/term_details?term=GO:0044703	no
post-embryonic development	GO:0009791	0.64122	1	1	AFLA_065130	26	.	0	AFLA_065130	1	http://amigo.geneontology.org/cgi-bin/amigo/term_details?term=GO:0009791	no
multicellular organismal reproductive process	GO:0048609	0.64122	1	1	AFLA_075840	26	.	0	AFLA_075840	1	http://amigo.geneontology.org/cgi-bin/amigo/term_details?term=GO:0048609	no
amino-acid betaine metabolic process	GO:0006577	0.64122	1	1	AFLA_079230	26	.	0	AFLA_079230	1	http://amigo.geneontology.org/cgi-bin/amigo/term_details?term=GO:0006577	no
positive regulation of phosphorylation	GO:0042327	0.64122	1	1	AFLA_034340	26	.	0	AFLA_034340	1	http://amigo.geneontology.org/cgi-bin/amigo/term_details?term=GO:0042327	no
protein targeting to membrane	GO:0006612	0.64122	1	1	AFLA_038590	26	AFLA_038590	1	.	0	http://amigo.geneontology.org/cgi-bin/amigo/term_details?term=GO:0006612	no
multicellular organism reproduction	GO:0032504	0.64122	1	1	AFLA_075840	26	.	0	AFLA_075840	1	http://amigo.geneontology.org/cgi-bin/amigo/term_details?term=GO:0032504	no
regulation of GTPase activity	GO:0043087	0.64122	1	1	AFLA_102850	26	AFLA_102850	1	.	0	http://amigo.geneontology.org/cgi-bin/amigo/term_details?term=GO:0043087	no
cell cycle DNA replication	GO:0044786	0.64122	1	1	AFLA_073340	26	AFLA_073340	1	.	0	http://amigo.geneontology.org/cgi-bin/amigo/term_details?term=GO:0044786	no
protein autophosphorylation	GO:0046777	0.64122	1	1	AFLA_065850	26	AFLA_065850	1	.	0	http://amigo.geneontology.org/cgi-bin/amigo/term_details?term=GO:0046777	no
branched-chain amino acid biosynthetic process	GO:0009082	0.64122	1	1	AFLA_134090	26	AFLA_134090	1	.	0	http://amigo.geneontology.org/cgi-bin/amigo/term_details?term=GO:0009082	no
organonitrogen compound biosynthetic process	GO:1901566	0.64149	1	19	AFLA_024750|AFLA_036440|AFLA_110930|AFLA_060530|AFLA_063420|AFLA_075840|AFLA_079230|AFLA_084230|AFLA_123350|AFLA_116430|AFLA_093230|AFLA_021700|AFLA_041430|AFLA_066210|AFLA_071180|AFLA_001850|AFLA_134090|AFLA_137200|AFLA_138430	522	AFLA_116430|AFLA_093230|AFLA_001850|AFLA_134090|AFLA_137200	5	AFLA_024750|AFLA_036440|AFLA_110930|AFLA_060530|AFLA_063420|AFLA_075840|AFLA_079230|AFLA_084230|AFLA_123350|AFLA_021700|AFLA_041430|AFLA_066210|AFLA_071180|AFLA_138430	14	http://amigo.geneontology.org/cgi-bin/amigo/term_details?term=GO:1901566	no
fungal-type cell wall organization	GO:0031505	0.64266	1	2	AFLA_087880|AFLA_066700	56	AFLA_087880	1	AFLA_066700	1	http://amigo.geneontology.org/cgi-bin/amigo/term_details?term=GO:0031505	no
response to drug	GO:0042493	0.64325	1	3	AFLA_028740|AFLA_109820|AFLA_039360	85	AFLA_028740|AFLA_039360	2	AFLA_109820	1	http://amigo.geneontology.org/cgi-bin/amigo/term_details?term=GO:0042493	no
response to external stimulus	GO:0009605	0.64326	1	9	AFLA_028740|AFLA_034340|AFLA_056250|AFLA_009750|AFLA_085740|AFLA_122570|AFLA_019060|AFLA_065850|AFLA_071180	252	AFLA_028740|AFLA_085740|AFLA_122570|AFLA_065850	4	AFLA_034340|AFLA_056250|AFLA_009750|AFLA_019060|AFLA_071180	5	http://amigo.geneontology.org/cgi-bin/amigo/term_details?term=GO:0009605	no
regulation of cell communication	GO:0010646	0.6463	1	5	AFLA_028740|AFLA_093230|AFLA_038590|AFLA_102850|AFLA_068440	142	AFLA_028740|AFLA_093230|AFLA_038590|AFLA_102850|AFLA_068440	5	.	0	http://amigo.geneontology.org/cgi-bin/amigo/term_details?term=GO:0010646	no
response to organic substance	GO:0010033	0.64688	1	6	AFLA_028740|AFLA_075840|AFLA_071180|AFLA_003220|AFLA_003810|AFLA_050300	170	AFLA_028740|AFLA_003220|AFLA_003810|AFLA_050300	4	AFLA_075840|AFLA_071180	2	http://amigo.geneontology.org/cgi-bin/amigo/term_details?term=GO:0010033	no
response to starvation	GO:0042594	0.64725	1	4	AFLA_028740|AFLA_034340|AFLA_056250|AFLA_019060	114	AFLA_028740	1	AFLA_034340|AFLA_056250|AFLA_019060	3	http://amigo.geneontology.org/cgi-bin/amigo/term_details?term=GO:0042594	no
lipid localization	GO:0010876	0.65227	1	2	AFLA_046150|AFLA_003050	57	AFLA_046150|AFLA_003050	2	.	0	http://amigo.geneontology.org/cgi-bin/amigo/term_details?term=GO:0010876	no
quinone biosynthetic process	GO:1901663	0.65512	1	1	AFLA_103000	27	AFLA_103000	1	.	0	http://amigo.geneontology.org/cgi-bin/amigo/term_details?term=GO:1901663	no
lipid homeostasis	GO:0055088	0.65512	1	1	AFLA_099270	27	.	0	AFLA_099270	1	http://amigo.geneontology.org/cgi-bin/amigo/term_details?term=GO:0055088	no
guanosine-containing compound catabolic process	GO:1901069	0.65512	1	1	AFLA_102850	27	AFLA_102850	1	.	0	http://amigo.geneontology.org/cgi-bin/amigo/term_details?term=GO:1901069	no
response to hormone	GO:0009725	0.65512	1	1	AFLA_028740	27	AFLA_028740	1	.	0	http://amigo.geneontology.org/cgi-bin/amigo/term_details?term=GO:0009725	no
animal organ morphogenesis	GO:0009887	0.65512	1	1	AFLA_075840	27	.	0	AFLA_075840	1	http://amigo.geneontology.org/cgi-bin/amigo/term_details?term=GO:0009887	no
beta-glucan metabolic process	GO:0051273	0.66168	1	2	AFLA_063040|AFLA_087870	58	AFLA_087870	1	AFLA_063040	1	http://amigo.geneontology.org/cgi-bin/amigo/term_details?term=GO:0051273	no
reproduction	GO:0000003	0.66466	1	12	AFLA_011230|AFLA_073340|AFLA_075840|AFLA_082850|AFLA_083110|AFLA_019060|AFLA_044790|AFLA_066700|AFLA_003220|AFLA_131330|AFLA_050300|AFLA_137060	339	AFLA_011230|AFLA_073340|AFLA_083110|AFLA_044790|AFLA_003220|AFLA_131330|AFLA_050300|AFLA_137060	8	AFLA_075840|AFLA_082850|AFLA_019060|AFLA_066700	4	http://amigo.geneontology.org/cgi-bin/amigo/term_details?term=GO:0000003	no
regulation of ion transport	GO:0043269	0.66848	1	1	AFLA_038590	28	AFLA_038590	1	.	0	http://amigo.geneontology.org/cgi-bin/amigo/term_details?term=GO:0043269	no
developmental growth	GO:0048589	0.66848	1	1	AFLA_131330	28	AFLA_131330	1	.	0	http://amigo.geneontology.org/cgi-bin/amigo/term_details?term=GO:0048589	no
response to xenobiotic stimulus	GO:0009410	0.66848	1	1	AFLA_024750	28	.	0	AFLA_024750	1	http://amigo.geneontology.org/cgi-bin/amigo/term_details?term=GO:0009410	no
mitochondrial genome maintenance	GO:0000002	0.66848	1	1	AFLA_071500	28	AFLA_071500	1	.	0	http://amigo.geneontology.org/cgi-bin/amigo/term_details?term=GO:0000002	no
peptidyl-serine phosphorylation	GO:0018105	0.66848	1	1	AFLA_047300	28	.	0	AFLA_047300	1	http://amigo.geneontology.org/cgi-bin/amigo/term_details?term=GO:0018105	no
protein complex disassembly	GO:0043241	0.66848	1	1	AFLA_089900	28	.	0	AFLA_089900	1	http://amigo.geneontology.org/cgi-bin/amigo/term_details?term=GO:0043241	no
regulation of actin filament-based process	GO:0032970	0.66848	1	1	AFLA_038590	28	AFLA_038590	1	.	0	http://amigo.geneontology.org/cgi-bin/amigo/term_details?term=GO:0032970	no
pentose metabolic process	GO:0019321	0.66848	1	1	AFLA_125700	28	.	0	AFLA_125700	1	http://amigo.geneontology.org/cgi-bin/amigo/term_details?term=GO:0019321	no
positive regulation of intracellular signal transduction	GO:1902533	0.66848	1	1	AFLA_068440	28	AFLA_068440	1	.	0	http://amigo.geneontology.org/cgi-bin/amigo/term_details?term=GO:1902533	no
regulation of transmembrane transport	GO:0034762	0.66848	1	1	AFLA_038590	28	AFLA_038590	1	.	0	http://amigo.geneontology.org/cgi-bin/amigo/term_details?term=GO:0034762	no
GTP metabolic process	GO:0046039	0.66848	1	1	AFLA_102850	28	AFLA_102850	1	.	0	http://amigo.geneontology.org/cgi-bin/amigo/term_details?term=GO:0046039	no
defense response	GO:0006952	0.67088	1	2	AFLA_097650|AFLA_071180	59	AFLA_097650	1	AFLA_071180	1	http://amigo.geneontology.org/cgi-bin/amigo/term_details?term=GO:0006952	no
cellular component biogenesis	GO:0044085	0.67269	1	25	AFLA_027970|AFLA_030140|AFLA_034340|AFLA_035340|AFLA_037860|AFLA_052640|AFLA_111980|AFLA_112090|AFLA_056250|AFLA_011230|AFLA_075840|AFLA_075860|AFLA_079160|AFLA_080140|AFLA_123350|AFLA_093230|AFLA_093880|AFLA_041730|AFLA_044170|AFLA_130100|AFLA_098430|AFLA_066700|AFLA_068000|AFLA_005180|AFLA_131470	693	AFLA_027970|AFLA_052640|AFLA_011230|AFLA_075860|AFLA_093230	5	AFLA_030140|AFLA_034340|AFLA_035340|AFLA_037860|AFLA_111980|AFLA_112090|AFLA_056250|AFLA_075840|AFLA_079160|AFLA_080140|AFLA_123350|AFLA_093880|AFLA_041730|AFLA_044170|AFLA_130100|AFLA_098430|AFLA_066700|AFLA_068000|AFLA_005180|AFLA_131470	20	http://amigo.geneontology.org/cgi-bin/amigo/term_details?term=GO:0044085	no
response to oxidative stress	GO:0006979	0.674	1	3	AFLA_030430|AFLA_098430|AFLA_134480	89	AFLA_134480	1	AFLA_030430|AFLA_098430	2	http://amigo.geneontology.org/cgi-bin/amigo/term_details?term=GO:0006979	no
cellular nitrogen compound catabolic process	GO:0044270	0.67906	1	7	AFLA_023420|AFLA_063160|AFLA_093470|AFLA_015920|AFLA_102850|AFLA_071180|AFLA_134560	204	AFLA_093470|AFLA_102850|AFLA_134560	3	AFLA_023420|AFLA_063160|AFLA_015920|AFLA_071180	4	http://amigo.geneontology.org/cgi-bin/amigo/term_details?term=GO:0044270	no
regulation of cell morphogenesis	GO:0022604	0.67988	1	2	AFLA_075840|AFLA_123350	60	.	0	AFLA_075840|AFLA_123350	2	http://amigo.geneontology.org/cgi-bin/amigo/term_details?term=GO:0022604	no
alpha-amino acid biosynthetic process	GO:1901607	0.67988	1	6	AFLA_036440|AFLA_060530|AFLA_084230|AFLA_021700|AFLA_041430|AFLA_134090	176	AFLA_134090	1	AFLA_036440|AFLA_060530|AFLA_084230|AFLA_021700|AFLA_041430	5	http://amigo.geneontology.org/cgi-bin/amigo/term_details?term=GO:1901607	no
cellular macromolecular complex assembly	GO:0034622	0.67991	1	9	AFLA_034340|AFLA_111980|AFLA_112090|AFLA_079160|AFLA_080140|AFLA_041730|AFLA_044170|AFLA_005180|AFLA_131470	260	.	0	AFLA_034340|AFLA_111980|AFLA_112090|AFLA_079160|AFLA_080140|AFLA_041730|AFLA_044170|AFLA_005180|AFLA_131470	9	http://amigo.geneontology.org/cgi-bin/amigo/term_details?term=GO:0034622	no
thioester metabolic process	GO:0035383	0.68133	1	1	AFLA_106350	29	AFLA_106350	1	.	0	http://amigo.geneontology.org/cgi-bin/amigo/term_details?term=GO:0035383	no
mitotic spindle organization	GO:0007052	0.68133	1	1	AFLA_047300	29	.	0	AFLA_047300	1	http://amigo.geneontology.org/cgi-bin/amigo/term_details?term=GO:0007052	no
acyl-CoA metabolic process	GO:0006637	0.68133	1	1	AFLA_106350	29	AFLA_106350	1	.	0	http://amigo.geneontology.org/cgi-bin/amigo/term_details?term=GO:0006637	no
regulation of Ras protein signal transduction	GO:0046578	0.68133	1	1	AFLA_102850	29	AFLA_102850	1	.	0	http://amigo.geneontology.org/cgi-bin/amigo/term_details?term=GO:0046578	no
ribonucleoside triphosphate catabolic process	GO:0009203	0.68133	1	1	AFLA_102850	29	AFLA_102850	1	.	0	http://amigo.geneontology.org/cgi-bin/amigo/term_details?term=GO:0009203	no
purine ribonucleoside triphosphate catabolic process	GO:0009207	0.68133	1	1	AFLA_102850	29	AFLA_102850	1	.	0	http://amigo.geneontology.org/cgi-bin/amigo/term_details?term=GO:0009207	no
pectin catabolic process	GO:0045490	0.68133	1	1	AFLA_081980	29	.	0	AFLA_081980	1	http://amigo.geneontology.org/cgi-bin/amigo/term_details?term=GO:0045490	no
regulation of nucleotide catabolic process	GO:0030811	0.68133	1	1	AFLA_102850	29	AFLA_102850	1	.	0	http://amigo.geneontology.org/cgi-bin/amigo/term_details?term=GO:0030811	no
galacturonan metabolic process	GO:0010393	0.68133	1	1	AFLA_081980	29	.	0	AFLA_081980	1	http://amigo.geneontology.org/cgi-bin/amigo/term_details?term=GO:0010393	no
regulation of purine nucleotide catabolic process	GO:0033121	0.68133	1	1	AFLA_102850	29	AFLA_102850	1	.	0	http://amigo.geneontology.org/cgi-bin/amigo/term_details?term=GO:0033121	no
maturation of 5.8S rRNA	GO:0000460	0.68133	1	1	AFLA_093880	29	.	0	AFLA_093880	1	http://amigo.geneontology.org/cgi-bin/amigo/term_details?term=GO:0000460	no
arginine metabolic process	GO:0006525	0.68133	1	1	AFLA_014490	29	AFLA_014490	1	.	0	http://amigo.geneontology.org/cgi-bin/amigo/term_details?term=GO:0006525	no
pectin metabolic process	GO:0045488	0.68133	1	1	AFLA_081980	29	.	0	AFLA_081980	1	http://amigo.geneontology.org/cgi-bin/amigo/term_details?term=GO:0045488	no
pyrimidine nucleotide biosynthetic process	GO:0006221	0.68133	1	1	AFLA_001850	29	AFLA_001850	1	.	0	http://amigo.geneontology.org/cgi-bin/amigo/term_details?term=GO:0006221	no
cellular lipid metabolic process	GO:0044255	0.68351	1	15	AFLA_030430|AFLA_106350|AFLA_107840|AFLA_108930|AFLA_110960|AFLA_073320|AFLA_077580|AFLA_119710|AFLA_044460|AFLA_099270|AFLA_065130|AFLA_066620|AFLA_003220|AFLA_003810|AFLA_049390	426	AFLA_106350|AFLA_108930|AFLA_110960|AFLA_073320|AFLA_077580|AFLA_119710|AFLA_066620|AFLA_003220|AFLA_003810	9	AFLA_030430|AFLA_107840|AFLA_044460|AFLA_099270|AFLA_065130|AFLA_049390	6	http://amigo.geneontology.org/cgi-bin/amigo/term_details?term=GO:0044255	no
heterocycle catabolic process	GO:0046700	0.68401	1	7	AFLA_023420|AFLA_063160|AFLA_093470|AFLA_015920|AFLA_102850|AFLA_071180|AFLA_134560	205	AFLA_093470|AFLA_102850|AFLA_134560	3	AFLA_023420|AFLA_063160|AFLA_015920|AFLA_071180	4	http://amigo.geneontology.org/cgi-bin/amigo/term_details?term=GO:0046700	no
cellular biosynthetic process	GO:0044249	0.68509	1	84	AFLA_023420|AFLA_024750|AFLA_050800|AFLA_026100|AFLA_030140|AFLA_030430|AFLA_031780|AFLA_034340|AFLA_036110|AFLA_036440|AFLA_106350|AFLA_107840|AFLA_108930|AFLA_109820|AFLA_110340|AFLA_110890|AFLA_110930|AFLA_111980|AFLA_112090|AFLA_054760|AFLA_056250|AFLA_057710|AFLA_058760|AFLA_060530|AFLA_060700|AFLA_063420|AFLA_012050|AFLA_012080|AFLA_073340|AFLA_075030|AFLA_125270|AFLA_075840|AFLA_077580|AFL…	2257	AFLA_026100|AFLA_106350|AFLA_108930|AFLA_110340|AFLA_110890|AFLA_073340|AFLA_077580|AFLA_085740|AFLA_086100|AFLA_116430|AFLA_119710|AFLA_122560|AFLA_122570|AFLA_093230|AFLA_128330|AFLA_014490|AFLA_045770|AFLA_103000|AFLA_065570|AFLA_065850|AFLA_066620|AFLA_001850|AFLA_003220|AFLA_003270|AFLA_131330|AFLA_134090|AFLA_050300	27	AFLA_023420|AFLA_024750|AFLA_050800|AFLA_030140|AFLA_030430|AFLA_031780|AFLA_034340|AFLA_036110|AFLA_036440|AFLA_107840|AFLA_109820|AFLA_110930|AFLA_111980|AFLA_112090|AFLA_054760|AFLA_056250|AFLA_057710|AFLA_058760|AFLA_060530|AFLA_060700|AFLA_063420|AFLA_012050|AFLA_012080|AFLA_075030|AFLA_125270|AFLA_075840|AFLA_079230|AFLA_079880|AFLA_080140|AFLA_082850|AFLA_084230|AFLA_123350|AFLA_118100|AFL…	57	http://amigo.geneontology.org/cgi-bin/amigo/term_details?term=GO:0044249	no
cellular response to oxygen-containing compound	GO:1901701	0.68868	1	2	AFLA_028740|AFLA_030430	61	AFLA_028740	1	AFLA_030430	1	http://amigo.geneontology.org/cgi-bin/amigo/term_details?term=GO:1901701	no
carbon catabolite activation of transcription from RNA polymerase II promoter	GO:0000436	0.68868	1	2	AFLA_085740|AFLA_122570	61	AFLA_085740|AFLA_122570	2	.	0	http://amigo.geneontology.org/cgi-bin/amigo/term_details?term=GO:0000436	no
regulation of nucleoside metabolic process	GO:0009118	0.69368	1	1	AFLA_102850	30	AFLA_102850	1	.	0	http://amigo.geneontology.org/cgi-bin/amigo/term_details?term=GO:0009118	no
quinone metabolic process	GO:1901661	0.69368	1	1	AFLA_103000	30	AFLA_103000	1	.	0	http://amigo.geneontology.org/cgi-bin/amigo/term_details?term=GO:1901661	no
response to alcohol	GO:0097305	0.69368	1	1	AFLA_028740	30	AFLA_028740	1	.	0	http://amigo.geneontology.org/cgi-bin/amigo/term_details?term=GO:0097305	no
pyrimidine nucleotide metabolic process	GO:0006220	0.69368	1	1	AFLA_001850	30	AFLA_001850	1	.	0	http://amigo.geneontology.org/cgi-bin/amigo/term_details?term=GO:0006220	no
regulation of small GTPase mediated signal transduction	GO:0051056	0.69368	1	1	AFLA_102850	30	AFLA_102850	1	.	0	http://amigo.geneontology.org/cgi-bin/amigo/term_details?term=GO:0051056	no
reproductive structure development	GO:0048608	0.69728	1	2	AFLA_019060|AFLA_065130	62	.	0	AFLA_019060|AFLA_065130	2	http://amigo.geneontology.org/cgi-bin/amigo/term_details?term=GO:0048608	no
reproductive system development	GO:0061458	0.69728	1	2	AFLA_019060|AFLA_065130	62	.	0	AFLA_019060|AFLA_065130	2	http://amigo.geneontology.org/cgi-bin/amigo/term_details?term=GO:0061458	no
carbon catabolite regulation of transcription from RNA polymerase II promoter	GO:0000429	0.69728	1	2	AFLA_085740|AFLA_122570	62	AFLA_085740|AFLA_122570	2	.	0	http://amigo.geneontology.org/cgi-bin/amigo/term_details?term=GO:0000429	no
conjugation	GO:0000746	0.69728	1	2	AFLA_003220|AFLA_050300	62	AFLA_003220|AFLA_050300	2	.	0	http://amigo.geneontology.org/cgi-bin/amigo/term_details?term=GO:0000746	no
conjugation with cellular fusion	GO:0000747	0.69728	1	2	AFLA_003220|AFLA_050300	62	AFLA_003220|AFLA_050300	2	.	0	http://amigo.geneontology.org/cgi-bin/amigo/term_details?term=GO:0000747	no
glutamine family amino acid metabolic process	GO:0009064	0.70276	1	3	AFLA_014490|AFLA_041420|AFLA_041430	93	AFLA_014490	1	AFLA_041420|AFLA_041430	2	http://amigo.geneontology.org/cgi-bin/amigo/term_details?term=GO:0009064	no
unsaturated fatty acid metabolic process	GO:0033559	0.70556	1	1	AFLA_030430	31	.	0	AFLA_030430	1	http://amigo.geneontology.org/cgi-bin/amigo/term_details?term=GO:0033559	no
response to acid chemical	GO:0001101	0.70556	1	1	AFLA_009750	31	.	0	AFLA_009750	1	http://amigo.geneontology.org/cgi-bin/amigo/term_details?term=GO:0001101	no
regulation of response to external stimulus	GO:0032101	0.70556	1	1	AFLA_071180	31	.	0	AFLA_071180	1	http://amigo.geneontology.org/cgi-bin/amigo/term_details?term=GO:0032101	no
carbon catabolite activation of transcription	GO:0045991	0.70568	1	2	AFLA_085740|AFLA_122570	63	AFLA_085740|AFLA_122570	2	.	0	http://amigo.geneontology.org/cgi-bin/amigo/term_details?term=GO:0045991	no
peptide metabolic process	GO:0006518	0.70568	1	2	AFLA_035970|AFLA_137760	63	AFLA_035970|AFLA_137760	2	.	0	http://amigo.geneontology.org/cgi-bin/amigo/term_details?term=GO:0006518	no
monovalent inorganic cation transport	GO:0015672	0.71389	1	2	AFLA_110050|AFLA_038590	64	AFLA_038590	1	AFLA_110050	1	http://amigo.geneontology.org/cgi-bin/amigo/term_details?term=GO:0015672	no
nucleic acid phosphodiester bond hydrolysis	GO:0090305	0.71389	1	2	AFLA_093470|AFLA_093880	64	AFLA_093470	1	AFLA_093880	1	http://amigo.geneontology.org/cgi-bin/amigo/term_details?term=GO:0090305	no
apoptotic process	GO:0006915	0.71389	1	2	AFLA_031780|AFLA_071180	64	.	0	AFLA_031780|AFLA_071180	2	http://amigo.geneontology.org/cgi-bin/amigo/term_details?term=GO:0006915	no
positive regulation of transcription from RNA polymerase II promoter	GO:0045944	0.71579	1	6	AFLA_109820|AFLA_085740|AFLA_122570|AFLA_014490|AFLA_015920|AFLA_131330	183	AFLA_085740|AFLA_122570|AFLA_014490|AFLA_131330	4	AFLA_109820|AFLA_015920	2	http://amigo.geneontology.org/cgi-bin/amigo/term_details?term=GO:0045944	no
regulation of cellular protein metabolic process	GO:0032268	0.71579	1	6	AFLA_031780|AFLA_034340|AFLA_093230|AFLA_041730|AFLA_101160|AFLA_131470	183	AFLA_093230	1	AFLA_031780|AFLA_034340|AFLA_041730|AFLA_101160|AFLA_131470	5	http://amigo.geneontology.org/cgi-bin/amigo/term_details?term=GO:0032268	no
nucleus organization	GO:0006997	0.71697	1	1	AFLA_047300	32	.	0	AFLA_047300	1	http://amigo.geneontology.org/cgi-bin/amigo/term_details?term=GO:0006997	no
glutathione metabolic process	GO:0006749	0.71697	1	1	AFLA_035970	32	AFLA_035970	1	.	0	http://amigo.geneontology.org/cgi-bin/amigo/term_details?term=GO:0006749	no
purine ribonucleotide catabolic process	GO:0009154	0.71697	1	1	AFLA_102850	32	AFLA_102850	1	.	0	http://amigo.geneontology.org/cgi-bin/amigo/term_details?term=GO:0009154	no
RNA phosphodiester bond hydrolysis	GO:0090501	0.71697	1	1	AFLA_093880	32	.	0	AFLA_093880	1	http://amigo.geneontology.org/cgi-bin/amigo/term_details?term=GO:0090501	no
purine nucleoside triphosphate catabolic process	GO:0009146	0.71697	1	1	AFLA_102850	32	AFLA_102850	1	.	0	http://amigo.geneontology.org/cgi-bin/amigo/term_details?term=GO:0009146	no
ribonucleotide catabolic process	GO:0009261	0.71697	1	1	AFLA_102850	32	AFLA_102850	1	.	0	http://amigo.geneontology.org/cgi-bin/amigo/term_details?term=GO:0009261	no
immune system process	GO:0002376	0.72191	1	2	AFLA_071180|AFLA_138560	65	AFLA_138560	1	AFLA_071180	1	http://amigo.geneontology.org/cgi-bin/amigo/term_details?term=GO:0002376	no
oxidoreduction coenzyme metabolic process	GO:0006733	0.72191	1	2	AFLA_092640|AFLA_103000	65	AFLA_092640|AFLA_103000	2	.	0	http://amigo.geneontology.org/cgi-bin/amigo/term_details?term=GO:0006733	no
monocarboxylic acid transport	GO:0015718	0.72191	1	2	AFLA_040450|AFLA_138640	65	.	0	AFLA_040450|AFLA_138640	2	http://amigo.geneontology.org/cgi-bin/amigo/term_details?term=GO:0015718	no
cell wall macromolecule metabolic process	GO:0044036	0.72304	1	3	AFLA_063680|AFLA_081980|AFLA_123350	96	.	0	AFLA_063680|AFLA_081980|AFLA_123350	3	http://amigo.geneontology.org/cgi-bin/amigo/term_details?term=GO:0044036	no
purine nucleobase metabolic process	GO:0006144	0.72795	1	1	AFLA_023420	33	.	0	AFLA_023420	1	http://amigo.geneontology.org/cgi-bin/amigo/term_details?term=GO:0006144	no
macromolecular complex disassembly	GO:0032984	0.72795	1	1	AFLA_089900	33	.	0	AFLA_089900	1	http://amigo.geneontology.org/cgi-bin/amigo/term_details?term=GO:0032984	no
peptidyl-serine modification	GO:0018209	0.72795	1	1	AFLA_047300	33	.	0	AFLA_047300	1	http://amigo.geneontology.org/cgi-bin/amigo/term_details?term=GO:0018209	no
sterigmatocystin metabolic process	GO:0045460	0.72795	1	1	AFLA_118100	33	.	0	AFLA_118100	1	http://amigo.geneontology.org/cgi-bin/amigo/term_details?term=GO:0045460	no
sterigmatocystin biosynthetic process	GO:0045461	0.72795	1	1	AFLA_118100	33	.	0	AFLA_118100	1	http://amigo.geneontology.org/cgi-bin/amigo/term_details?term=GO:0045461	no
import into cell	GO:0098657	0.72795	1	1	AFLA_068440	33	AFLA_068440	1	.	0	http://amigo.geneontology.org/cgi-bin/amigo/term_details?term=GO:0098657	no
RNA export from nucleus	GO:0006405	0.72795	1	1	AFLA_034340	33	.	0	AFLA_034340	1	http://amigo.geneontology.org/cgi-bin/amigo/term_details?term=GO:0006405	no
immune response	GO:0006955	0.72795	1	1	AFLA_071180	33	.	0	AFLA_071180	1	http://amigo.geneontology.org/cgi-bin/amigo/term_details?term=GO:0006955	no
mitotic cytokinesis	GO:0000281	0.72795	1	1	AFLA_047300	33	.	0	AFLA_047300	1	http://amigo.geneontology.org/cgi-bin/amigo/term_details?term=GO:0000281	no
metabolic process	GO:0008152	0.72853	1	178	AFLA_023420|AFLA_023490|AFLA_024510|AFLA_024750|AFLA_050800|AFLA_026100|AFLA_027970|AFLA_028740|AFLA_029780|AFLA_030140|AFLA_030250|AFLA_030430|AFLA_031380|AFLA_031780|AFLA_033330|AFLA_034340|AFLA_035030|AFLA_035340|AFLA_035970|AFLA_036090|AFLA_036110|AFLA_036440|AFLA_037830|AFLA_106350|AFLA_107800|AFLA_107840|AFLA_108330|AFLA_108930|AFLA_109820|AFLA_110340|AFLA_110890|AFLA_110930|AFLA_110960|AFL…	4706	AFLA_023490|AFLA_026100|AFLA_027970|AFLA_028740|AFLA_029780|AFLA_030250|AFLA_031380|AFLA_035030|AFLA_035970|AFLA_106350|AFLA_108330|AFLA_108930|AFLA_110340|AFLA_110890|AFLA_110960|AFLA_112010|AFLA_057420|AFLA_062260|AFLA_054470|AFLA_011230|AFLA_073320|AFLA_073340|AFLA_125090|AFLA_073770|AFLA_075860|AFLA_077580|AFLA_078120|AFLA_081090|AFLA_084630|AFLA_085740|AFLA_086100|AFLA_087870|AFLA_116430|AFL…	80	AFLA_023420|AFLA_024510|AFLA_024750|AFLA_050800|AFLA_030140|AFLA_030430|AFLA_031780|AFLA_033330|AFLA_034340|AFLA_035340|AFLA_036090|AFLA_036110|AFLA_036440|AFLA_037830|AFLA_107800|AFLA_107840|AFLA_109820|AFLA_110930|AFLA_111980|AFLA_112090|AFLA_054760|AFLA_056250|AFLA_057710|AFLA_058760|AFLA_060530|AFLA_060680|AFLA_060700|AFLA_061280|AFLA_063040|AFLA_063160|AFLA_063420|AFLA_063680|AFLA_124470|AFL…	98	http://amigo.geneontology.org/cgi-bin/amigo/term_details?term=GO:0008152	no
single-organism cellular localization	GO:1902580	0.72956	1	3	AFLA_052640|AFLA_089900|AFLA_038590	97	AFLA_052640|AFLA_038590	2	AFLA_089900	1	http://amigo.geneontology.org/cgi-bin/amigo/term_details?term=GO:1902580	no
single-organism localization	GO:1902578	0.72956	1	3	AFLA_052640|AFLA_089900|AFLA_038590	97	AFLA_052640|AFLA_038590	2	AFLA_089900	1	http://amigo.geneontology.org/cgi-bin/amigo/term_details?term=GO:1902578	no
cell wall polysaccharide metabolic process	GO:0010383	0.72973	1	2	AFLA_063680|AFLA_081980	66	.	0	AFLA_063680|AFLA_081980	2	http://amigo.geneontology.org/cgi-bin/amigo/term_details?term=GO:0010383	no
programmed cell death	GO:0012501	0.72973	1	2	AFLA_031780|AFLA_071180	66	.	0	AFLA_031780|AFLA_071180	2	http://amigo.geneontology.org/cgi-bin/amigo/term_details?term=GO:0012501	no
carbon catabolite regulation of transcription	GO:0045990	0.73737	1	2	AFLA_085740|AFLA_122570	67	AFLA_085740|AFLA_122570	2	.	0	http://amigo.geneontology.org/cgi-bin/amigo/term_details?term=GO:0045990	no
cell surface receptor signaling pathway	GO:0007166	0.73737	1	2	AFLA_093230|AFLA_050300	67	AFLA_093230|AFLA_050300	2	.	0	http://amigo.geneontology.org/cgi-bin/amigo/term_details?term=GO:0007166	no
response to radiation	GO:0009314	0.7385	1	1	AFLA_065850	34	AFLA_065850	1	.	0	http://amigo.geneontology.org/cgi-bin/amigo/term_details?term=GO:0009314	no
response to antibiotic	GO:0046677	0.7385	1	1	AFLA_039360	34	AFLA_039360	1	.	0	http://amigo.geneontology.org/cgi-bin/amigo/term_details?term=GO:0046677	no
telomere organization	GO:0032200	0.7385	1	1	AFLA_031780	34	.	0	AFLA_031780	1	http://amigo.geneontology.org/cgi-bin/amigo/term_details?term=GO:0032200	no
telomere maintenance	GO:0000723	0.7385	1	1	AFLA_031780	34	.	0	AFLA_031780	1	http://amigo.geneontology.org/cgi-bin/amigo/term_details?term=GO:0000723	no
ion transmembrane transport	GO:0034220	0.74134	1	5	AFLA_032450|AFLA_112960|AFLA_038590|AFLA_097710|AFLA_068440	159	AFLA_112960|AFLA_038590|AFLA_068440	3	AFLA_032450|AFLA_097710	2	http://amigo.geneontology.org/cgi-bin/amigo/term_details?term=GO:0034220	no
cellular carbohydrate biosynthetic process	GO:0034637	0.74483	1	2	AFLA_075840|AFLA_122210	68	.	0	AFLA_075840|AFLA_122210	2	http://amigo.geneontology.org/cgi-bin/amigo/term_details?term=GO:0034637	no
ribonucleoside biosynthetic process	GO:0042455	0.74483	1	2	AFLA_093230|AFLA_001850	68	AFLA_093230|AFLA_001850	2	.	0	http://amigo.geneontology.org/cgi-bin/amigo/term_details?term=GO:0042455	no
inorganic cation transmembrane transport	GO:0098662	0.74483	1	2	AFLA_038590|AFLA_068440	68	AFLA_038590|AFLA_068440	2	.	0	http://amigo.geneontology.org/cgi-bin/amigo/term_details?term=GO:0098662	no
nucleoside triphosphate catabolic process	GO:0009143	0.74864	1	1	AFLA_102850	35	AFLA_102850	1	.	0	http://amigo.geneontology.org/cgi-bin/amigo/term_details?term=GO:0009143	no
tricarboxylic acid cycle	GO:0006099	0.74864	1	1	AFLA_049390	35	.	0	AFLA_049390	1	http://amigo.geneontology.org/cgi-bin/amigo/term_details?term=GO:0006099	no
purine nucleotide catabolic process	GO:0006195	0.74864	1	1	AFLA_102850	35	AFLA_102850	1	.	0	http://amigo.geneontology.org/cgi-bin/amigo/term_details?term=GO:0006195	no
reproductive fruiting body development	GO:0030582	0.74864	1	1	AFLA_019060	35	.	0	AFLA_019060	1	http://amigo.geneontology.org/cgi-bin/amigo/term_details?term=GO:0030582	no
carbohydrate derivative biosynthetic process	GO:1901137	0.74989	1	9	AFLA_110340|AFLA_012050|AFLA_012080|AFLA_075840|AFLA_123350|AFLA_116430|AFLA_093230|AFLA_001850|AFLA_137200	277	AFLA_110340|AFLA_116430|AFLA_093230|AFLA_001850|AFLA_137200	5	AFLA_012050|AFLA_012080|AFLA_075840|AFLA_123350	4	http://amigo.geneontology.org/cgi-bin/amigo/term_details?term=GO:1901137	no
nucleoside biosynthetic process	GO:0009163	0.7521	1	2	AFLA_093230|AFLA_001850	69	AFLA_093230|AFLA_001850	2	.	0	http://amigo.geneontology.org/cgi-bin/amigo/term_details?term=GO:0009163	no
positive regulation of cellular protein metabolic process	GO:0032270	0.7521	1	2	AFLA_034340|AFLA_101160	69	.	0	AFLA_034340|AFLA_101160	2	http://amigo.geneontology.org/cgi-bin/amigo/term_details?term=GO:0032270	no
organelle localization	GO:0051640	0.7521	1	2	AFLA_098430|AFLA_069190	69	AFLA_069190	1	AFLA_098430	1	http://amigo.geneontology.org/cgi-bin/amigo/term_details?term=GO:0051640	no
amino acid transport	GO:0006865	0.75443	1	3	AFLA_112960|AFLA_040450|AFLA_138640	101	AFLA_112960	1	AFLA_040450|AFLA_138640	2	http://amigo.geneontology.org/cgi-bin/amigo/term_details?term=GO:0006865	no
positive regulation of macromolecule biosynthetic process	GO:0010557	0.75659	1	8	AFLA_109820|AFLA_075840|AFLA_085740|AFLA_122570|AFLA_014490|AFLA_015920|AFLA_101160|AFLA_131330	250	AFLA_085740|AFLA_122570|AFLA_014490|AFLA_131330	4	AFLA_109820|AFLA_075840|AFLA_015920|AFLA_101160	4	http://amigo.geneontology.org/cgi-bin/amigo/term_details?term=GO:0010557	no
response to nutrient levels	GO:0031667	0.75778	1	6	AFLA_028740|AFLA_034340|AFLA_056250|AFLA_085740|AFLA_122570|AFLA_019060	192	AFLA_028740|AFLA_085740|AFLA_122570	3	AFLA_034340|AFLA_056250|AFLA_019060	3	http://amigo.geneontology.org/cgi-bin/amigo/term_details?term=GO:0031667	no
cellular metabolic compound salvage	GO:0043094	0.75839	1	1	AFLA_001850	36	AFLA_001850	1	.	0	http://amigo.geneontology.org/cgi-bin/amigo/term_details?term=GO:0043094	no
lysine metabolic process	GO:0006553	0.75839	1	1	AFLA_005130	36	.	0	AFLA_005130	1	http://amigo.geneontology.org/cgi-bin/amigo/term_details?term=GO:0006553	no
positive regulation of phosphorus metabolic process	GO:0010562	0.75839	1	1	AFLA_034340	36	.	0	AFLA_034340	1	http://amigo.geneontology.org/cgi-bin/amigo/term_details?term=GO:0010562	no
regulation of purine nucleotide metabolic process	GO:1900542	0.75839	1	1	AFLA_102850	36	AFLA_102850	1	.	0	http://amigo.geneontology.org/cgi-bin/amigo/term_details?term=GO:1900542	no
cell adhesion	GO:0007155	0.75839	1	1	AFLA_075840	36	.	0	AFLA_075840	1	http://amigo.geneontology.org/cgi-bin/amigo/term_details?term=GO:0007155	no
guanosine-containing compound metabolic process	GO:1901068	0.75839	1	1	AFLA_102850	36	AFLA_102850	1	.	0	http://amigo.geneontology.org/cgi-bin/amigo/term_details?term=GO:1901068	no
biological adhesion	GO:0022610	0.75839	1	1	AFLA_075840	36	.	0	AFLA_075840	1	http://amigo.geneontology.org/cgi-bin/amigo/term_details?term=GO:0022610	no
cellular component disassembly	GO:0022411	0.75839	1	1	AFLA_089900	36	.	0	AFLA_089900	1	http://amigo.geneontology.org/cgi-bin/amigo/term_details?term=GO:0022411	no
positive regulation of phosphate metabolic process	GO:0045937	0.75839	1	1	AFLA_034340	36	.	0	AFLA_034340	1	http://amigo.geneontology.org/cgi-bin/amigo/term_details?term=GO:0045937	no
positive regulation of response to stimulus	GO:0048584	0.7592	1	2	AFLA_068440|AFLA_071180	70	AFLA_068440	1	AFLA_071180	1	http://amigo.geneontology.org/cgi-bin/amigo/term_details?term=GO:0048584	no
cellular response to oxidative stress	GO:0034599	0.7592	1	2	AFLA_030430|AFLA_098430	70	.	0	AFLA_030430|AFLA_098430	2	http://amigo.geneontology.org/cgi-bin/amigo/term_details?term=GO:0034599	no
response to extracellular stimulus	GO:0009991	0.76216	1	6	AFLA_028740|AFLA_034340|AFLA_056250|AFLA_085740|AFLA_122570|AFLA_019060	193	AFLA_028740|AFLA_085740|AFLA_122570	3	AFLA_034340|AFLA_056250|AFLA_019060	3	http://amigo.geneontology.org/cgi-bin/amigo/term_details?term=GO:0009991	no
nucleotide biosynthetic process	GO:0009165	0.7666	1	4	AFLA_012050|AFLA_012080|AFLA_116430|AFLA_001850	134	AFLA_116430|AFLA_001850	2	AFLA_012050|AFLA_012080	2	http://amigo.geneontology.org/cgi-bin/amigo/term_details?term=GO:0009165	no
cell wall macromolecule biosynthetic process	GO:0044038	0.76777	1	1	AFLA_123350	37	.	0	AFLA_123350	1	http://amigo.geneontology.org/cgi-bin/amigo/term_details?term=GO:0044038	no
cellular component macromolecule biosynthetic process	GO:0070589	0.76777	1	1	AFLA_123350	37	.	0	AFLA_123350	1	http://amigo.geneontology.org/cgi-bin/amigo/term_details?term=GO:0070589	no
spore-bearing organ development	GO:0075259	0.76777	1	1	AFLA_019060	37	.	0	AFLA_019060	1	http://amigo.geneontology.org/cgi-bin/amigo/term_details?term=GO:0075259	no
positive regulation of macromolecule metabolic process	GO:0010604	0.76921	1	10	AFLA_034340|AFLA_109820|AFLA_075840|AFLA_085740|AFLA_122570|AFLA_014490|AFLA_015920|AFLA_038590|AFLA_101160|AFLA_131330	311	AFLA_085740|AFLA_122570|AFLA_014490|AFLA_038590|AFLA_131330	5	AFLA_034340|AFLA_109820|AFLA_075840|AFLA_015920|AFLA_101160	5	http://amigo.geneontology.org/cgi-bin/amigo/term_details?term=GO:0010604	no
cell death	GO:0008219	0.77287	1	2	AFLA_031780|AFLA_071180	72	.	0	AFLA_031780|AFLA_071180	2	http://amigo.geneontology.org/cgi-bin/amigo/term_details?term=GO:0008219	no
glycosyl compound biosynthetic process	GO:1901659	0.77287	1	2	AFLA_093230|AFLA_001850	72	AFLA_093230|AFLA_001850	2	.	0	http://amigo.geneontology.org/cgi-bin/amigo/term_details?term=GO:1901659	no
inorganic ion transmembrane transport	GO:0098660	0.77287	1	2	AFLA_038590|AFLA_068440	72	AFLA_038590|AFLA_068440	2	.	0	http://amigo.geneontology.org/cgi-bin/amigo/term_details?term=GO:0098660	no
response to endogenous stimulus	GO:0009719	0.77287	1	2	AFLA_028740|AFLA_075840	72	AFLA_028740	1	AFLA_075840	1	http://amigo.geneontology.org/cgi-bin/amigo/term_details?term=GO:0009719	no
localization	GO:0051179	0.77446	1	58	AFLA_024520|AFLA_024810|AFLA_028740|AFLA_124130|AFLA_032450|AFLA_034340|AFLA_124230|AFLA_106750|AFLA_052640|AFLA_110050|AFLA_112960|AFLA_056120|AFLA_059480|AFLA_007610|AFLA_008850|AFLA_009750|AFLA_075840|AFLA_075860|AFLA_077030|AFLA_078270|AFLA_080990|AFLA_082760|AFLA_083400|AFLA_126510|AFLA_089900|AFLA_091020|AFLA_095670|AFLA_018740|AFLA_019060|AFLA_038580|AFLA_038590|AFLA_039360|AFLA_040450|AFL…	1622	AFLA_028740|AFLA_052640|AFLA_112960|AFLA_056120|AFLA_007610|AFLA_008850|AFLA_075860|AFLA_078270|AFLA_083400|AFLA_038580|AFLA_038590|AFLA_039360|AFLA_129430|AFLA_045770|AFLA_045960|AFLA_046070|AFLA_046150|AFLA_098090|AFLA_098330|AFLA_068440|AFLA_069190|AFLA_003050|AFLA_003220|AFLA_003810|AFLA_137060	25	AFLA_024520|AFLA_024810|AFLA_124130|AFLA_032450|AFLA_034340|AFLA_124230|AFLA_106750|AFLA_110050|AFLA_059480|AFLA_009750|AFLA_075840|AFLA_077030|AFLA_080990|AFLA_082760|AFLA_126510|AFLA_089900|AFLA_091020|AFLA_095670|AFLA_018740|AFLA_019060|AFLA_040450|AFLA_043090|AFLA_047300|AFLA_097330|AFLA_097710|AFLA_098430|AFLA_064430|AFLA_069320|AFLA_070950|AFLA_003980|AFLA_131830|AFLA_050180|AFLA_138640	33	http://amigo.geneontology.org/cgi-bin/amigo/term_details?term=GO:0051179	no
ribonucleoside metabolic process	GO:0009119	0.7766	1	4	AFLA_093230|AFLA_102850|AFLA_001850|AFLA_134560	136	AFLA_093230|AFLA_102850|AFLA_001850|AFLA_134560	4	.	0	http://amigo.geneontology.org/cgi-bin/amigo/term_details?term=GO:0009119	no
sexual reproduction	GO:0019953	0.7766	1	4	AFLA_066700|AFLA_003220|AFLA_050300|AFLA_137060	136	AFLA_003220|AFLA_050300|AFLA_137060	3	AFLA_066700	1	http://amigo.geneontology.org/cgi-bin/amigo/term_details?term=GO:0019953	no
positive regulation of gene expression	GO:0010628	0.77666	1	7	AFLA_109820|AFLA_085740|AFLA_122570|AFLA_014490|AFLA_015920|AFLA_038590|AFLA_131330	226	AFLA_085740|AFLA_122570|AFLA_014490|AFLA_038590|AFLA_131330	5	AFLA_109820|AFLA_015920	2	http://amigo.geneontology.org/cgi-bin/amigo/term_details?term=GO:0010628	no
DNA packaging	GO:0006323	0.77678	1	1	AFLA_047300	38	.	0	AFLA_047300	1	http://amigo.geneontology.org/cgi-bin/amigo/term_details?term=GO:0006323	no
peptide transport	GO:0015833	0.77678	1	1	AFLA_028740	38	AFLA_028740	1	.	0	http://amigo.geneontology.org/cgi-bin/amigo/term_details?term=GO:0015833	no
positive regulation of developmental process	GO:0051094	0.77678	1	1	AFLA_075840	38	.	0	AFLA_075840	1	http://amigo.geneontology.org/cgi-bin/amigo/term_details?term=GO:0051094	no
anatomical structure homeostasis	GO:0060249	0.77678	1	1	AFLA_031780	38	.	0	AFLA_031780	1	http://amigo.geneontology.org/cgi-bin/amigo/term_details?term=GO:0060249	no
methionine biosynthetic process	GO:0009086	0.77678	1	1	AFLA_084230	38	.	0	AFLA_084230	1	http://amigo.geneontology.org/cgi-bin/amigo/term_details?term=GO:0009086	no
positive regulation of protein metabolic process	GO:0051247	0.77944	1	2	AFLA_034340|AFLA_101160	73	.	0	AFLA_034340|AFLA_101160	2	http://amigo.geneontology.org/cgi-bin/amigo/term_details?term=GO:0051247	no
multi-organism cellular process	GO:0044764	0.78291	1	3	AFLA_003220|AFLA_003810|AFLA_050300	106	AFLA_003220|AFLA_003810|AFLA_050300	3	.	0	http://amigo.geneontology.org/cgi-bin/amigo/term_details?term=GO:0044764	no
lipoprotein biosynthetic process	GO:0042158	0.78544	1	1	AFLA_003270	39	AFLA_003270	1	.	0	http://amigo.geneontology.org/cgi-bin/amigo/term_details?term=GO:0042158	no
protein lipidation	GO:0006497	0.78544	1	1	AFLA_003270	39	AFLA_003270	1	.	0	http://amigo.geneontology.org/cgi-bin/amigo/term_details?term=GO:0006497	no
drug transport	GO:0015893	0.78544	1	1	AFLA_039360	39	AFLA_039360	1	.	0	http://amigo.geneontology.org/cgi-bin/amigo/term_details?term=GO:0015893	no
methionine metabolic process	GO:0006555	0.78544	1	1	AFLA_084230	39	.	0	AFLA_084230	1	http://amigo.geneontology.org/cgi-bin/amigo/term_details?term=GO:0006555	no
ncRNA metabolic process	GO:0034660	0.7892	1	9	AFLA_033330|AFLA_035340|AFLA_079160|AFLA_091360|AFLA_093230|AFLA_093880|AFLA_044170|AFLA_130100|AFLA_068000	288	AFLA_093230	1	AFLA_033330|AFLA_035340|AFLA_079160|AFLA_091360|AFLA_093880|AFLA_044170|AFLA_130100|AFLA_068000	8	http://amigo.geneontology.org/cgi-bin/amigo/term_details?term=GO:0034660	no
nucleoside phosphate biosynthetic process	GO:1901293	0.79096	1	4	AFLA_012050|AFLA_012080|AFLA_116430|AFLA_001850	139	AFLA_116430|AFLA_001850	2	AFLA_012050|AFLA_012080	2	http://amigo.geneontology.org/cgi-bin/amigo/term_details?term=GO:1901293	no
meiotic cell cycle process	GO:1903046	0.79351	1	3	AFLA_066700|AFLA_003220|AFLA_137060	108	AFLA_003220|AFLA_137060	2	AFLA_066700	1	http://amigo.geneontology.org/cgi-bin/amigo/term_details?term=GO:1903046	no
nucleotide catabolic process	GO:0009166	0.79377	1	1	AFLA_102850	40	AFLA_102850	1	.	0	http://amigo.geneontology.org/cgi-bin/amigo/term_details?term=GO:0009166	no
response to external biotic stimulus	GO:0043207	0.79377	1	1	AFLA_071180	40	.	0	AFLA_071180	1	http://amigo.geneontology.org/cgi-bin/amigo/term_details?term=GO:0043207	no
positive regulation of protein modification process	GO:0031401	0.79377	1	1	AFLA_034340	40	.	0	AFLA_034340	1	http://amigo.geneontology.org/cgi-bin/amigo/term_details?term=GO:0031401	no
regulation of nucleotide metabolic process	GO:0006140	0.79377	1	1	AFLA_102850	40	AFLA_102850	1	.	0	http://amigo.geneontology.org/cgi-bin/amigo/term_details?term=GO:0006140	no
regulation of cellular ketone metabolic process	GO:0010565	0.79377	1	1	AFLA_014490	40	AFLA_014490	1	.	0	http://amigo.geneontology.org/cgi-bin/amigo/term_details?term=GO:0010565	no
phytosteroid biosynthetic process	GO:0016129	0.79377	1	1	AFLA_119710	40	AFLA_119710	1	.	0	http://amigo.geneontology.org/cgi-bin/amigo/term_details?term=GO:0016129	no
cellular alcohol biosynthetic process	GO:0044108	0.79377	1	1	AFLA_119710	40	AFLA_119710	1	.	0	http://amigo.geneontology.org/cgi-bin/amigo/term_details?term=GO:0044108	no
ergosterol biosynthetic process	GO:0006696	0.79377	1	1	AFLA_119710	40	AFLA_119710	1	.	0	http://amigo.geneontology.org/cgi-bin/amigo/term_details?term=GO:0006696	no
response to other organism	GO:0051707	0.79377	1	1	AFLA_071180	40	.	0	AFLA_071180	1	http://amigo.geneontology.org/cgi-bin/amigo/term_details?term=GO:0051707	no
mitotic cell cycle checkpoint	GO:0007093	0.79377	1	1	AFLA_047300	40	.	0	AFLA_047300	1	http://amigo.geneontology.org/cgi-bin/amigo/term_details?term=GO:0007093	no
cellular response to drug	GO:0035690	0.79377	1	1	AFLA_109820	40	.	0	AFLA_109820	1	http://amigo.geneontology.org/cgi-bin/amigo/term_details?term=GO:0035690	no
pyrimidine-containing compound biosynthetic process	GO:0072528	0.79377	1	1	AFLA_001850	40	AFLA_001850	1	.	0	http://amigo.geneontology.org/cgi-bin/amigo/term_details?term=GO:0072528	no
establishment of localization in cell	GO:0051649	0.797	1	16	AFLA_028740|AFLA_034340|AFLA_052640|AFLA_056120|AFLA_077030|AFLA_089900|AFLA_095670|AFLA_038590|AFLA_045960|AFLA_046150|AFLA_047300|AFLA_098430|AFLA_068440|AFLA_069190|AFLA_003220|AFLA_137060	491	AFLA_028740|AFLA_052640|AFLA_056120|AFLA_038590|AFLA_045960|AFLA_046150|AFLA_068440|AFLA_069190|AFLA_003220|AFLA_137060	10	AFLA_034340|AFLA_077030|AFLA_089900|AFLA_095670|AFLA_047300|AFLA_098430	6	http://amigo.geneontology.org/cgi-bin/amigo/term_details?term=GO:0051649	no
cellular response to nutrient	GO:0031670	0.79819	1	2	AFLA_085740|AFLA_122570	76	AFLA_085740|AFLA_122570	2	.	0	http://amigo.geneontology.org/cgi-bin/amigo/term_details?term=GO:0031670	no
actin cytoskeleton organization	GO:0030036	0.79819	1	2	AFLA_052640|AFLA_089900	76	AFLA_052640	1	AFLA_089900	1	http://amigo.geneontology.org/cgi-bin/amigo/term_details?term=GO:0030036	no
macromolecular complex assembly	GO:0065003	0.79863	1	10	AFLA_034340|AFLA_111980|AFLA_112090|AFLA_079160|AFLA_080140|AFLA_093230|AFLA_041730|AFLA_044170|AFLA_005180|AFLA_131470	320	AFLA_093230	1	AFLA_034340|AFLA_111980|AFLA_112090|AFLA_079160|AFLA_080140|AFLA_041730|AFLA_044170|AFLA_005180|AFLA_131470	9	http://amigo.geneontology.org/cgi-bin/amigo/term_details?term=GO:0065003	no
protein acylation	GO:0043543	0.80178	1	1	AFLA_003270	41	AFLA_003270	1	.	0	http://amigo.geneontology.org/cgi-bin/amigo/term_details?term=GO:0043543	no
spindle organization	GO:0007051	0.80178	1	1	AFLA_047300	41	.	0	AFLA_047300	1	http://amigo.geneontology.org/cgi-bin/amigo/term_details?term=GO:0007051	no
glutamine family amino acid biosynthetic process	GO:0009084	0.80178	1	1	AFLA_041430	41	.	0	AFLA_041430	1	http://amigo.geneontology.org/cgi-bin/amigo/term_details?term=GO:0009084	no
sulfur compound biosynthetic process	GO:0044272	0.80369	1	3	AFLA_024750|AFLA_106350|AFLA_084230	110	AFLA_106350	1	AFLA_024750|AFLA_084230	2	http://amigo.geneontology.org/cgi-bin/amigo/term_details?term=GO:0044272	no
carbohydrate derivative metabolic process	GO:1901135	0.80852	1	13	AFLA_031380|AFLA_110340|AFLA_054470|AFLA_012050|AFLA_012080|AFLA_075840|AFLA_123350|AFLA_116430|AFLA_093230|AFLA_102850|AFLA_001850|AFLA_134560|AFLA_137200	410	AFLA_031380|AFLA_110340|AFLA_054470|AFLA_116430|AFLA_093230|AFLA_102850|AFLA_001850|AFLA_134560|AFLA_137200	9	AFLA_012050|AFLA_012080|AFLA_075840|AFLA_123350	4	http://amigo.geneontology.org/cgi-bin/amigo/term_details?term=GO:1901135	no
regulation of protein kinase activity	GO:0045859	0.80948	1	1	AFLA_034340	42	.	0	AFLA_034340	1	http://amigo.geneontology.org/cgi-bin/amigo/term_details?term=GO:0045859	no
nucleoside phosphate catabolic process	GO:1901292	0.80948	1	1	AFLA_102850	42	AFLA_102850	1	.	0	http://amigo.geneontology.org/cgi-bin/amigo/term_details?term=GO:1901292	no
sulfur amino acid biosynthetic process	GO:0000097	0.80948	1	1	AFLA_084230	42	.	0	AFLA_084230	1	http://amigo.geneontology.org/cgi-bin/amigo/term_details?term=GO:0000097	no
isoprenoid biosynthetic process	GO:0008299	0.80948	1	1	AFLA_119710	42	AFLA_119710	1	.	0	http://amigo.geneontology.org/cgi-bin/amigo/term_details?term=GO:0008299	no
energy derivation by oxidation of organic compounds	GO:0015980	0.80989	1	2	AFLA_049390|AFLA_005130	78	.	0	AFLA_049390|AFLA_005130	2	http://amigo.geneontology.org/cgi-bin/amigo/term_details?term=GO:0015980	no
regulation of protein metabolic process	GO:0051246	0.81382	1	6	AFLA_031780|AFLA_034340|AFLA_093230|AFLA_041730|AFLA_101160|AFLA_131470	206	AFLA_093230	1	AFLA_031780|AFLA_034340|AFLA_041730|AFLA_101160|AFLA_131470	5	http://amigo.geneontology.org/cgi-bin/amigo/term_details?term=GO:0051246	no
maintenance of location in cell	GO:0051651	0.81688	1	1	AFLA_050180	43	.	0	AFLA_050180	1	http://amigo.geneontology.org/cgi-bin/amigo/term_details?term=GO:0051651	no
lipoprotein metabolic process	GO:0042157	0.81688	1	1	AFLA_003270	43	AFLA_003270	1	.	0	http://amigo.geneontology.org/cgi-bin/amigo/term_details?term=GO:0042157	no
regulation of cell shape	GO:0008360	0.81688	1	1	AFLA_123350	43	.	0	AFLA_123350	1	http://amigo.geneontology.org/cgi-bin/amigo/term_details?term=GO:0008360	no
nuclear-transcribed mRNA catabolic process	GO:0000956	0.81688	1	1	AFLA_093470	43	AFLA_093470	1	.	0	http://amigo.geneontology.org/cgi-bin/amigo/term_details?term=GO:0000956	no
nucleoside metabolic process	GO:0009116	0.81748	1	4	AFLA_093230|AFLA_102850|AFLA_001850|AFLA_134560	145	AFLA_093230|AFLA_102850|AFLA_001850|AFLA_134560	4	.	0	http://amigo.geneontology.org/cgi-bin/amigo/term_details?term=GO:0009116	no
phospholipid metabolic process	GO:0006644	0.81748	1	4	AFLA_110960|AFLA_077580|AFLA_003220|AFLA_003810	145	AFLA_110960|AFLA_077580|AFLA_003220|AFLA_003810	4	.	0	http://amigo.geneontology.org/cgi-bin/amigo/term_details?term=GO:0006644	no
cation transmembrane transport	GO:0098655	0.82098	1	2	AFLA_038590|AFLA_068440	80	AFLA_038590|AFLA_068440	2	.	0	http://amigo.geneontology.org/cgi-bin/amigo/term_details?term=GO:0098655	no
macromolecular complex subunit organization	GO:0043933	0.82166	1	13	AFLA_034340|AFLA_052640|AFLA_111980|AFLA_112090|AFLA_079160|AFLA_080140|AFLA_089900|AFLA_093230|AFLA_041730|AFLA_044170|AFLA_047300|AFLA_005180|AFLA_131470	415	AFLA_052640|AFLA_093230	2	AFLA_034340|AFLA_111980|AFLA_112090|AFLA_079160|AFLA_080140|AFLA_089900|AFLA_041730|AFLA_044170|AFLA_047300|AFLA_005180|AFLA_131470	11	http://amigo.geneontology.org/cgi-bin/amigo/term_details?term=GO:0043933	no
regulation of catalytic activity	GO:0050790	0.82278	1	3	AFLA_034340|AFLA_018500|AFLA_102850	114	AFLA_018500|AFLA_102850	2	AFLA_034340	1	http://amigo.geneontology.org/cgi-bin/amigo/term_details?term=GO:0050790	no
vitamin biosynthetic process	GO:0009110	0.82399	1	1	AFLA_044400	44	.	0	AFLA_044400	1	http://amigo.geneontology.org/cgi-bin/amigo/term_details?term=GO:0009110	no
water-soluble vitamin biosynthetic process	GO:0042364	0.82399	1	1	AFLA_044400	44	.	0	AFLA_044400	1	http://amigo.geneontology.org/cgi-bin/amigo/term_details?term=GO:0042364	no
sphingolipid metabolic process	GO:0006665	0.82399	1	1	AFLA_003810	44	AFLA_003810	1	.	0	http://amigo.geneontology.org/cgi-bin/amigo/term_details?term=GO:0006665	no
negative regulation of organelle organization	GO:0010639	0.82399	1	1	AFLA_047300	44	.	0	AFLA_047300	1	http://amigo.geneontology.org/cgi-bin/amigo/term_details?term=GO:0010639	no
regulation of protein localization	GO:0032880	0.82399	1	1	AFLA_098430	44	.	0	AFLA_098430	1	http://amigo.geneontology.org/cgi-bin/amigo/term_details?term=GO:0032880	no
regulation of molecular function	GO:0065009	0.82568	1	4	AFLA_034340|AFLA_018500|AFLA_038590|AFLA_102850	147	AFLA_018500|AFLA_038590|AFLA_102850	3	AFLA_034340	1	http://amigo.geneontology.org/cgi-bin/amigo/term_details?term=GO:0065009	no
regulation of kinase activity	GO:0043549	0.83083	1	1	AFLA_034340	45	.	0	AFLA_034340	1	http://amigo.geneontology.org/cgi-bin/amigo/term_details?term=GO:0043549	no
negative regulation of cellular protein metabolic process	GO:0032269	0.83083	1	1	AFLA_093230	45	AFLA_093230	1	.	0	http://amigo.geneontology.org/cgi-bin/amigo/term_details?term=GO:0032269	no
negative regulation of signal transduction	GO:0009968	0.83083	1	1	AFLA_102850	45	AFLA_102850	1	.	0	http://amigo.geneontology.org/cgi-bin/amigo/term_details?term=GO:0009968	no
regulation of anatomical structure morphogenesis	GO:0022603	0.8315	1	2	AFLA_075840|AFLA_123350	82	.	0	AFLA_075840|AFLA_123350	2	http://amigo.geneontology.org/cgi-bin/amigo/term_details?term=GO:0022603	no
positive regulation of biosynthetic process	GO:0009891	0.83507	1	8	AFLA_109820|AFLA_075840|AFLA_085740|AFLA_122570|AFLA_014490|AFLA_015920|AFLA_101160|AFLA_131330	273	AFLA_085740|AFLA_122570|AFLA_014490|AFLA_131330	4	AFLA_109820|AFLA_075840|AFLA_015920|AFLA_101160	4	http://amigo.geneontology.org/cgi-bin/amigo/term_details?term=GO:0009891	no
regulation of intracellular signal transduction	GO:1902531	0.83654	1	2	AFLA_102850|AFLA_068440	83	AFLA_102850|AFLA_068440	2	.	0	http://amigo.geneontology.org/cgi-bin/amigo/term_details?term=GO:1902531	no
sulfur amino acid metabolic process	GO:0000096	0.8374	1	1	AFLA_084230	46	.	0	AFLA_084230	1	http://amigo.geneontology.org/cgi-bin/amigo/term_details?term=GO:0000096	no
cellular response to endogenous stimulus	GO:0071495	0.8374	1	1	AFLA_075840	46	.	0	AFLA_075840	1	http://amigo.geneontology.org/cgi-bin/amigo/term_details?term=GO:0071495	no
Ras protein signal transduction	GO:0007265	0.8374	1	1	AFLA_102850	46	AFLA_102850	1	.	0	http://amigo.geneontology.org/cgi-bin/amigo/term_details?term=GO:0007265	no
cellular polysaccharide biosynthetic process	GO:0033692	0.8374	1	1	AFLA_075840	46	.	0	AFLA_075840	1	http://amigo.geneontology.org/cgi-bin/amigo/term_details?term=GO:0033692	no
regulation of hydrolase activity	GO:0051336	0.8374	1	1	AFLA_102850	46	AFLA_102850	1	.	0	http://amigo.geneontology.org/cgi-bin/amigo/term_details?term=GO:0051336	no
polysaccharide biosynthetic process	GO:0000271	0.8374	1	1	AFLA_075840	46	.	0	AFLA_075840	1	http://amigo.geneontology.org/cgi-bin/amigo/term_details?term=GO:0000271	no
positive regulation of transcription, DNA-templated	GO:0045893	0.83778	1	6	AFLA_109820|AFLA_085740|AFLA_122570|AFLA_014490|AFLA_015920|AFLA_131330	213	AFLA_085740|AFLA_122570|AFLA_014490|AFLA_131330	4	AFLA_109820|AFLA_015920	2	http://amigo.geneontology.org/cgi-bin/amigo/term_details?term=GO:0045893	no
nucleobase-containing small molecule metabolic process	GO:0055086	0.83806	1	9	AFLA_023420|AFLA_012050|AFLA_012080|AFLA_116430|AFLA_092640|AFLA_093230|AFLA_102850|AFLA_001850|AFLA_134560	304	AFLA_116430|AFLA_092640|AFLA_093230|AFLA_102850|AFLA_001850|AFLA_134560	6	AFLA_023420|AFLA_012050|AFLA_012080	3	http://amigo.geneontology.org/cgi-bin/amigo/term_details?term=GO:0055086	no
positive regulation of signaling	GO:0023056	0.84372	1	1	AFLA_068440	47	AFLA_068440	1	.	0	http://amigo.geneontology.org/cgi-bin/amigo/term_details?term=GO:0023056	no
regulation of mitotic nuclear division	GO:0007088	0.84372	1	1	AFLA_047300	47	.	0	AFLA_047300	1	http://amigo.geneontology.org/cgi-bin/amigo/term_details?term=GO:0007088	no
positive regulation of signal transduction	GO:0009967	0.84372	1	1	AFLA_068440	47	AFLA_068440	1	.	0	http://amigo.geneontology.org/cgi-bin/amigo/term_details?term=GO:0009967	no
negative regulation of cell communication	GO:0010648	0.84372	1	1	AFLA_102850	47	AFLA_102850	1	.	0	http://amigo.geneontology.org/cgi-bin/amigo/term_details?term=GO:0010648	no
negative regulation of signaling	GO:0023057	0.84372	1	1	AFLA_102850	47	AFLA_102850	1	.	0	http://amigo.geneontology.org/cgi-bin/amigo/term_details?term=GO:0023057	no
glycosyl compound metabolic process	GO:1901657	0.84487	1	4	AFLA_093230|AFLA_102850|AFLA_001850|AFLA_134560	152	AFLA_093230|AFLA_102850|AFLA_001850|AFLA_134560	4	.	0	http://amigo.geneontology.org/cgi-bin/amigo/term_details?term=GO:1901657	no
nucleocytoplasmic transport	GO:0006913	0.84623	1	2	AFLA_034340|AFLA_098430	85	.	0	AFLA_034340|AFLA_098430	2	http://amigo.geneontology.org/cgi-bin/amigo/term_details?term=GO:0006913	no
nuclear transport	GO:0051169	0.84623	1	2	AFLA_034340|AFLA_098430	85	.	0	AFLA_034340|AFLA_098430	2	http://amigo.geneontology.org/cgi-bin/amigo/term_details?term=GO:0051169	no
oxidation-reduction process	GO:0055114	0.84772	1	7	AFLA_061280|AFLA_073320|AFLA_044390|AFLA_099270|AFLA_068150|AFLA_049390|AFLA_005130	247	AFLA_073320|AFLA_068150	2	AFLA_061280|AFLA_044390|AFLA_099270|AFLA_049390|AFLA_005130	5	http://amigo.geneontology.org/cgi-bin/amigo/term_details?term=GO:0055114	no
cellular component assembly	GO:0022607	0.84796	1	14	AFLA_027970|AFLA_034340|AFLA_052640|AFLA_111980|AFLA_112090|AFLA_075840|AFLA_079160|AFLA_080140|AFLA_093230|AFLA_041730|AFLA_044170|AFLA_066700|AFLA_005180|AFLA_131470	455	AFLA_027970|AFLA_052640|AFLA_093230	3	AFLA_034340|AFLA_111980|AFLA_112090|AFLA_075840|AFLA_079160|AFLA_080140|AFLA_041730|AFLA_044170|AFLA_066700|AFLA_005180|AFLA_131470	11	http://amigo.geneontology.org/cgi-bin/amigo/term_details?term=GO:0022607	no
aerobic respiration	GO:0009060	0.84979	1	1	AFLA_049390	48	.	0	AFLA_049390	1	http://amigo.geneontology.org/cgi-bin/amigo/term_details?term=GO:0009060	no
nervous system development	GO:0007399	0.84979	1	1	AFLA_028740	48	AFLA_028740	1	.	0	http://amigo.geneontology.org/cgi-bin/amigo/term_details?term=GO:0007399	no
nicotinamide nucleotide metabolic process	GO:0046496	0.84979	1	1	AFLA_092640	48	AFLA_092640	1	.	0	http://amigo.geneontology.org/cgi-bin/amigo/term_details?term=GO:0046496	no
pyridine nucleotide metabolic process	GO:0019362	0.84979	1	1	AFLA_092640	48	AFLA_092640	1	.	0	http://amigo.geneontology.org/cgi-bin/amigo/term_details?term=GO:0019362	no
response to temperature stimulus	GO:0009266	0.84979	1	1	AFLA_061280	48	.	0	AFLA_061280	1	http://amigo.geneontology.org/cgi-bin/amigo/term_details?term=GO:0009266	no
pyrimidine-containing compound metabolic process	GO:0072527	0.84979	1	1	AFLA_001850	48	AFLA_001850	1	.	0	http://amigo.geneontology.org/cgi-bin/amigo/term_details?term=GO:0072527	no
cellular response to starvation	GO:0009267	0.85087	1	2	AFLA_034340|AFLA_056250	86	.	0	AFLA_034340|AFLA_056250	2	http://amigo.geneontology.org/cgi-bin/amigo/term_details?term=GO:0009267	no
positive regulation of nitrogen compound metabolic process	GO:0051173	0.85343	1	7	AFLA_109820|AFLA_075840|AFLA_085740|AFLA_122570|AFLA_014490|AFLA_015920|AFLA_131330	249	AFLA_085740|AFLA_122570|AFLA_014490|AFLA_131330	4	AFLA_109820|AFLA_075840|AFLA_015920	3	http://amigo.geneontology.org/cgi-bin/amigo/term_details?term=GO:0051173	no
organic substance metabolic process	GO:0071704	0.85445	1	158	AFLA_023420|AFLA_023490|AFLA_024510|AFLA_024750|AFLA_050800|AFLA_026100|AFLA_028740|AFLA_029780|AFLA_030140|AFLA_030250|AFLA_030430|AFLA_031380|AFLA_031780|AFLA_033330|AFLA_034340|AFLA_035030|AFLA_035340|AFLA_035970|AFLA_036090|AFLA_036110|AFLA_036440|AFLA_106350|AFLA_107840|AFLA_108930|AFLA_109820|AFLA_110340|AFLA_110890|AFLA_110930|AFLA_110960|AFLA_111980|AFLA_112010|AFLA_112090|AFLA_054760|AFL…	4280	AFLA_023490|AFLA_026100|AFLA_028740|AFLA_029780|AFLA_030250|AFLA_031380|AFLA_035030|AFLA_035970|AFLA_106350|AFLA_108930|AFLA_110340|AFLA_110890|AFLA_110960|AFLA_112010|AFLA_057420|AFLA_062260|AFLA_054470|AFLA_011230|AFLA_073320|AFLA_073340|AFLA_125090|AFLA_073770|AFLA_075860|AFLA_077580|AFLA_078120|AFLA_085740|AFLA_086100|AFLA_087870|AFLA_116430|AFLA_119710|AFLA_120890|AFLA_121370|AFLA_122560|AFL…	71	AFLA_023420|AFLA_024510|AFLA_024750|AFLA_050800|AFLA_030140|AFLA_030430|AFLA_031780|AFLA_033330|AFLA_034340|AFLA_035340|AFLA_036090|AFLA_036110|AFLA_036440|AFLA_107840|AFLA_109820|AFLA_110930|AFLA_111980|AFLA_112090|AFLA_054760|AFLA_056250|AFLA_058760|AFLA_060530|AFLA_060680|AFLA_060700|AFLA_063040|AFLA_063160|AFLA_063420|AFLA_063680|AFLA_124470|AFLA_012050|AFLA_012080|AFLA_073450|AFLA_074520|AFL…	87	http://amigo.geneontology.org/cgi-bin/amigo/term_details?term=GO:0071704	no
glycosylation	GO:0070085	0.85539	1	2	AFLA_110340|AFLA_065130	87	AFLA_110340	1	AFLA_065130	1	http://amigo.geneontology.org/cgi-bin/amigo/term_details?term=GO:0070085	no
protein folding	GO:0006457	0.85539	1	2	AFLA_075860|AFLA_093230	87	AFLA_075860|AFLA_093230	2	.	0	http://amigo.geneontology.org/cgi-bin/amigo/term_details?term=GO:0006457	no
amide transport	GO:0042886	0.85563	1	1	AFLA_028740	49	AFLA_028740	1	.	0	http://amigo.geneontology.org/cgi-bin/amigo/term_details?term=GO:0042886	no
negative regulation of protein metabolic process	GO:0051248	0.85563	1	1	AFLA_093230	49	AFLA_093230	1	.	0	http://amigo.geneontology.org/cgi-bin/amigo/term_details?term=GO:0051248	no
mRNA catabolic process	GO:0006402	0.85563	1	1	AFLA_093470	49	AFLA_093470	1	.	0	http://amigo.geneontology.org/cgi-bin/amigo/term_details?term=GO:0006402	no
cell cycle checkpoint	GO:0000075	0.85563	1	1	AFLA_047300	49	.	0	AFLA_047300	1	http://amigo.geneontology.org/cgi-bin/amigo/term_details?term=GO:0000075	no
anion transport	GO:0006820	0.85648	1	9	AFLA_024520|AFLA_112960|AFLA_075860|AFLA_082760|AFLA_040450|AFLA_045770|AFLA_046150|AFLA_097710|AFLA_138640	311	AFLA_112960|AFLA_075860|AFLA_045770|AFLA_046150	4	AFLA_024520|AFLA_082760|AFLA_040450|AFLA_097710|AFLA_138640	5	http://amigo.geneontology.org/cgi-bin/amigo/term_details?term=GO:0006820	no
positive regulation of metabolic process	GO:0009893	0.86121	1	10	AFLA_034340|AFLA_109820|AFLA_075840|AFLA_085740|AFLA_122570|AFLA_014490|AFLA_015920|AFLA_038590|AFLA_101160|AFLA_131330	343	AFLA_085740|AFLA_122570|AFLA_014490|AFLA_038590|AFLA_131330	5	AFLA_034340|AFLA_109820|AFLA_075840|AFLA_015920|AFLA_101160	5	http://amigo.geneontology.org/cgi-bin/amigo/term_details?term=GO:0009893	no
regulation of reproductive process	GO:2000241	0.86125	1	1	AFLA_073340	50	AFLA_073340	1	.	0	http://amigo.geneontology.org/cgi-bin/amigo/term_details?term=GO:2000241	no
water-soluble vitamin metabolic process	GO:0006767	0.86125	1	1	AFLA_044400	50	.	0	AFLA_044400	1	http://amigo.geneontology.org/cgi-bin/amigo/term_details?term=GO:0006767	no
response to stress	GO:0006950	0.86173	1	21	AFLA_028740|AFLA_030430|AFLA_031780|AFLA_034340|AFLA_124230|AFLA_109830|AFLA_056250|AFLA_061280|AFLA_063160|AFLA_009750|AFLA_075840|AFLA_075860|AFLA_017580|AFLA_019060|AFLA_038580|AFLA_097650|AFLA_098430|AFLA_068440|AFLA_071180|AFLA_003050|AFLA_134480	663	AFLA_028740|AFLA_075860|AFLA_017580|AFLA_038580|AFLA_097650|AFLA_068440|AFLA_003050|AFLA_134480	8	AFLA_030430|AFLA_031780|AFLA_034340|AFLA_124230|AFLA_109830|AFLA_056250|AFLA_061280|AFLA_063160|AFLA_009750|AFLA_075840|AFLA_019060|AFLA_098430|AFLA_071180	13	http://amigo.geneontology.org/cgi-bin/amigo/term_details?term=GO:0006950	no
regulation of response to stimulus	GO:0048583	0.86411	1	5	AFLA_028740|AFLA_093230|AFLA_102850|AFLA_068440|AFLA_071180	190	AFLA_028740|AFLA_093230|AFLA_102850|AFLA_068440	4	AFLA_071180	1	http://amigo.geneontology.org/cgi-bin/amigo/term_details?term=GO:0048583	no
ER to Golgi vesicle-mediated transport	GO:0006888	0.86664	1	1	AFLA_069190	51	AFLA_069190	1	.	0	http://amigo.geneontology.org/cgi-bin/amigo/term_details?term=GO:0006888	no
cytosolic transport	GO:0016482	0.86739	1	8	AFLA_034340|AFLA_089900|AFLA_038590|AFLA_045960|AFLA_047300|AFLA_098430|AFLA_068440|AFLA_069190	285	AFLA_038590|AFLA_045960|AFLA_068440|AFLA_069190	4	AFLA_034340|AFLA_089900|AFLA_047300|AFLA_098430	4	http://amigo.geneontology.org/cgi-bin/amigo/term_details?term=GO:0016482	no
DNA conformation change	GO:0071103	0.87183	1	1	AFLA_047300	52	.	0	AFLA_047300	1	http://amigo.geneontology.org/cgi-bin/amigo/term_details?term=GO:0071103	no
cellular modified amino acid biosynthetic process	GO:0042398	0.87183	1	1	AFLA_079230	52	.	0	AFLA_079230	1	http://amigo.geneontology.org/cgi-bin/amigo/term_details?term=GO:0042398	no
negative regulation of mitotic cell cycle phase transition	GO:1901991	0.87183	1	1	AFLA_047300	52	.	0	AFLA_047300	1	http://amigo.geneontology.org/cgi-bin/amigo/term_details?term=GO:1901991	no
amide biosynthetic process	GO:0043604	0.87183	1	1	AFLA_024750	52	.	0	AFLA_024750	1	http://amigo.geneontology.org/cgi-bin/amigo/term_details?term=GO:0043604	no
single-organism intracellular transport	GO:1902582	0.87248	1	11	AFLA_034340|AFLA_052640|AFLA_089900|AFLA_095670|AFLA_038590|AFLA_045960|AFLA_046150|AFLA_047300|AFLA_098430|AFLA_068440|AFLA_069190	378	AFLA_052640|AFLA_038590|AFLA_045960|AFLA_046150|AFLA_068440|AFLA_069190	6	AFLA_034340|AFLA_089900|AFLA_095670|AFLA_047300|AFLA_098430	5	http://amigo.geneontology.org/cgi-bin/amigo/term_details?term=GO:1902582	no
positive regulation of RNA biosynthetic process	GO:1902680	0.87305	1	6	AFLA_109820|AFLA_085740|AFLA_122570|AFLA_014490|AFLA_015920|AFLA_131330	225	AFLA_085740|AFLA_122570|AFLA_014490|AFLA_131330	4	AFLA_109820|AFLA_015920	2	http://amigo.geneontology.org/cgi-bin/amigo/term_details?term=GO:1902680	no
growth	GO:0040007	0.87427	1	3	AFLA_052640|AFLA_011230|AFLA_131330	127	AFLA_052640|AFLA_011230|AFLA_131330	3	.	0	http://amigo.geneontology.org/cgi-bin/amigo/term_details?term=GO:0040007	no
regulation of signal transduction	GO:0009966	0.87427	1	3	AFLA_093230|AFLA_102850|AFLA_068440	127	AFLA_093230|AFLA_102850|AFLA_068440	3	.	0	http://amigo.geneontology.org/cgi-bin/amigo/term_details?term=GO:0009966	no
cellular response to nutrient levels	GO:0031669	0.87495	1	4	AFLA_034340|AFLA_056250|AFLA_085740|AFLA_122570	161	AFLA_085740|AFLA_122570	2	AFLA_034340|AFLA_056250	2	http://amigo.geneontology.org/cgi-bin/amigo/term_details?term=GO:0031669	no
aspartate family amino acid metabolic process	GO:0009066	0.87617	1	2	AFLA_084230|AFLA_005130	92	.	0	AFLA_084230|AFLA_005130	2	http://amigo.geneontology.org/cgi-bin/amigo/term_details?term=GO:0009066	no
regulation of protein phosphorylation	GO:0001932	0.87682	1	1	AFLA_034340	53	.	0	AFLA_034340	1	http://amigo.geneontology.org/cgi-bin/amigo/term_details?term=GO:0001932	no
regulation of growth	GO:0040008	0.87682	1	1	AFLA_052640	53	AFLA_052640	1	.	0	http://amigo.geneontology.org/cgi-bin/amigo/term_details?term=GO:0040008	no
negative regulation of cell cycle phase transition	GO:1901988	0.87682	1	1	AFLA_047300	53	.	0	AFLA_047300	1	http://amigo.geneontology.org/cgi-bin/amigo/term_details?term=GO:1901988	no
vitamin metabolic process	GO:0006766	0.87682	1	1	AFLA_044400	53	.	0	AFLA_044400	1	http://amigo.geneontology.org/cgi-bin/amigo/term_details?term=GO:0006766	no
protein processing	GO:0016485	0.87682	1	1	AFLA_003260	53	AFLA_003260	1	.	0	http://amigo.geneontology.org/cgi-bin/amigo/term_details?term=GO:0016485	no
cellular response to external stimulus	GO:0071496	0.87796	1	4	AFLA_034340|AFLA_056250|AFLA_085740|AFLA_122570	162	AFLA_085740|AFLA_122570	2	AFLA_034340|AFLA_056250	2	http://amigo.geneontology.org/cgi-bin/amigo/term_details?term=GO:0071496	no
cellular response to extracellular stimulus	GO:0031668	0.87796	1	4	AFLA_034340|AFLA_056250|AFLA_085740|AFLA_122570	162	AFLA_085740|AFLA_122570	2	AFLA_034340|AFLA_056250	2	http://amigo.geneontology.org/cgi-bin/amigo/term_details?term=GO:0031668	no
response to stimulus	GO:0050896	0.87978	1	40	AFLA_024750|AFLA_028740|AFLA_030430|AFLA_031780|AFLA_034340|AFLA_124230|AFLA_052640|AFLA_109820|AFLA_109830|AFLA_056250|AFLA_061280|AFLA_063160|AFLA_009750|AFLA_075840|AFLA_075860|AFLA_085740|AFLA_126510|AFLA_122570|AFLA_093230|AFLA_017580|AFLA_018740|AFLA_019060|AFLA_038580|AFLA_038590|AFLA_039360|AFLA_097650|AFLA_098430|AFLA_102850|AFLA_065850|AFLA_068440|AFLA_071180|AFLA_003050|AFLA_003220|AFL…	1206	AFLA_028740|AFLA_052640|AFLA_075860|AFLA_085740|AFLA_122570|AFLA_093230|AFLA_017580|AFLA_038580|AFLA_038590|AFLA_039360|AFLA_097650|AFLA_102850|AFLA_065850|AFLA_068440|AFLA_003050|AFLA_003220|AFLA_003810|AFLA_131330|AFLA_134480|AFLA_050300	20	AFLA_024750|AFLA_030430|AFLA_031780|AFLA_034340|AFLA_124230|AFLA_109820|AFLA_109830|AFLA_056250|AFLA_061280|AFLA_063160|AFLA_009750|AFLA_075840|AFLA_126510|AFLA_018740|AFLA_019060|AFLA_098430|AFLA_071180|AFLA_003980|AFLA_050180|AFLA_137780	20	http://amigo.geneontology.org/cgi-bin/amigo/term_details?term=GO:0050896	no
positive regulation of cell communication	GO:0010647	0.88161	1	1	AFLA_068440	54	AFLA_068440	1	.	0	http://amigo.geneontology.org/cgi-bin/amigo/term_details?term=GO:0010647	no
nucleobase metabolic process	GO:0009112	0.88621	1	1	AFLA_023420	55	.	0	AFLA_023420	1	http://amigo.geneontology.org/cgi-bin/amigo/term_details?term=GO:0009112	no
dephosphorylation	GO:0016311	0.88621	1	1	AFLA_092640	55	AFLA_092640	1	.	0	http://amigo.geneontology.org/cgi-bin/amigo/term_details?term=GO:0016311	no
tRNA metabolic process	GO:0006399	0.88721	1	3	AFLA_033330|AFLA_091360|AFLA_093230	131	AFLA_093230	1	AFLA_033330|AFLA_091360	2	http://amigo.geneontology.org/cgi-bin/amigo/term_details?term=GO:0006399	no
protein phosphorylation	GO:0006468	0.89026	1	3	AFLA_034340|AFLA_047300|AFLA_065850	132	AFLA_065850	1	AFLA_034340|AFLA_047300	2	http://amigo.geneontology.org/cgi-bin/amigo/term_details?term=GO:0006468	no
intracellular signal transduction	GO:0035556	0.89051	1	6	AFLA_031780|AFLA_052640|AFLA_038590|AFLA_102850|AFLA_068440|AFLA_003220	232	AFLA_052640|AFLA_038590|AFLA_102850|AFLA_068440|AFLA_003220	5	AFLA_031780	1	http://amigo.geneontology.org/cgi-bin/amigo/term_details?term=GO:0035556	no
anion transmembrane transport	GO:0098656	0.89064	1	1	AFLA_112960	56	AFLA_112960	1	.	0	http://amigo.geneontology.org/cgi-bin/amigo/term_details?term=GO:0098656	no
negative regulation of transcription, DNA-templated	GO:0045892	0.89323	1	3	AFLA_109820|AFLA_122560|AFLA_093880	133	AFLA_122560	1	AFLA_109820|AFLA_093880	2	http://amigo.geneontology.org/cgi-bin/amigo/term_details?term=GO:0045892	no
nucleobase-containing compound catabolic process	GO:0034655	0.89323	1	3	AFLA_093470|AFLA_102850|AFLA_134560	133	AFLA_093470|AFLA_102850|AFLA_134560	3	.	0	http://amigo.geneontology.org/cgi-bin/amigo/term_details?term=GO:0034655	no
ribonucleoside monophosphate biosynthetic process	GO:0009156	0.8949	1	1	AFLA_001850	57	AFLA_001850	1	.	0	http://amigo.geneontology.org/cgi-bin/amigo/term_details?term=GO:0009156	no
negative regulation of gene expression, epigenetic	GO:0045814	0.8949	1	1	AFLA_093880	57	.	0	AFLA_093880	1	http://amigo.geneontology.org/cgi-bin/amigo/term_details?term=GO:0045814	no
chromatin silencing	GO:0006342	0.8949	1	1	AFLA_093880	57	.	0	AFLA_093880	1	http://amigo.geneontology.org/cgi-bin/amigo/term_details?term=GO:0006342	no
cytoskeleton-dependent cytokinesis	GO:0061640	0.8949	1	1	AFLA_047300	57	.	0	AFLA_047300	1	http://amigo.geneontology.org/cgi-bin/amigo/term_details?term=GO:0061640	no
isoprenoid metabolic process	GO:0006720	0.8949	1	1	AFLA_119710	57	AFLA_119710	1	.	0	http://amigo.geneontology.org/cgi-bin/amigo/term_details?term=GO:0006720	no
DNA-dependent DNA replication	GO:0006261	0.8949	1	1	AFLA_073340	57	AFLA_073340	1	.	0	http://amigo.geneontology.org/cgi-bin/amigo/term_details?term=GO:0006261	no
single-organism process	GO:0044699	0.89592	1	161	AFLA_023420|AFLA_023600|AFLA_024510|AFLA_024520|AFLA_024750|AFLA_024810|AFLA_028740|AFLA_029780|AFLA_124130|AFLA_030250|AFLA_030430|AFLA_031780|AFLA_032000|AFLA_032450|AFLA_034340|AFLA_035030|AFLA_035970|AFLA_036090|AFLA_036110|AFLA_036440|AFLA_106350|AFLA_106750|AFLA_107840|AFLA_108930|AFLA_052640|AFLA_109820|AFLA_110050|AFLA_110340|AFLA_110890|AFLA_110930|AFLA_110960|AFLA_112010|AFLA_112960|AFL…	4393	AFLA_023600|AFLA_028740|AFLA_029780|AFLA_030250|AFLA_032000|AFLA_035030|AFLA_035970|AFLA_106350|AFLA_108930|AFLA_052640|AFLA_110340|AFLA_110890|AFLA_110960|AFLA_112010|AFLA_112960|AFLA_056120|AFLA_062260|AFLA_007610|AFLA_008850|AFLA_011230|AFLA_073320|AFLA_073340|AFLA_073770|AFLA_075860|AFLA_077580|AFLA_083110|AFLA_083400|AFLA_085740|AFLA_116430|AFLA_119710|AFLA_120890|AFLA_122560|AFLA_122570|AFL…	74	AFLA_023420|AFLA_024510|AFLA_024520|AFLA_024750|AFLA_024810|AFLA_124130|AFLA_030430|AFLA_031780|AFLA_032450|AFLA_034340|AFLA_036090|AFLA_036110|AFLA_036440|AFLA_106750|AFLA_107840|AFLA_109820|AFLA_110050|AFLA_110930|AFLA_056250|AFLA_058760|AFLA_059480|AFLA_060530|AFLA_060700|AFLA_061280|AFLA_063160|AFLA_063420|AFLA_124470|AFLA_124520|AFLA_009750|AFLA_012050|AFLA_012080|AFLA_125270|AFLA_075840|AFL…	87	http://amigo.geneontology.org/cgi-bin/amigo/term_details?term=GO:0044699	no
negative regulation of RNA biosynthetic process	GO:1902679	0.89613	1	3	AFLA_109820|AFLA_122560|AFLA_093880	134	AFLA_122560	1	AFLA_109820|AFLA_093880	2	http://amigo.geneontology.org/cgi-bin/amigo/term_details?term=GO:1902679	no
phospholipid biosynthetic process	GO:0008654	0.89746	1	2	AFLA_077580|AFLA_003220	98	AFLA_077580|AFLA_003220	2	.	0	http://amigo.geneontology.org/cgi-bin/amigo/term_details?term=GO:0008654	no
negative regulation of response to stimulus	GO:0048585	0.89899	1	1	AFLA_102850	58	AFLA_102850	1	.	0	http://amigo.geneontology.org/cgi-bin/amigo/term_details?term=GO:0048585	no
negative regulation of cellular component organization	GO:0051129	0.89899	1	1	AFLA_047300	58	.	0	AFLA_047300	1	http://amigo.geneontology.org/cgi-bin/amigo/term_details?term=GO:0051129	no
regulation of nuclear division	GO:0051783	0.89899	1	1	AFLA_047300	58	.	0	AFLA_047300	1	http://amigo.geneontology.org/cgi-bin/amigo/term_details?term=GO:0051783	no
regulation of transferase activity	GO:0051338	0.89899	1	1	AFLA_034340	58	.	0	AFLA_034340	1	http://amigo.geneontology.org/cgi-bin/amigo/term_details?term=GO:0051338	no
regulation of DNA metabolic process	GO:0051052	0.89899	1	1	AFLA_073340	58	AFLA_073340	1	.	0	http://amigo.geneontology.org/cgi-bin/amigo/term_details?term=GO:0051052	no
positive regulation of RNA metabolic process	GO:0051254	0.89955	1	6	AFLA_109820|AFLA_085740|AFLA_122570|AFLA_014490|AFLA_015920|AFLA_131330	236	AFLA_085740|AFLA_122570|AFLA_014490|AFLA_131330	4	AFLA_109820|AFLA_015920	2	http://amigo.geneontology.org/cgi-bin/amigo/term_details?term=GO:0051254	no
positive regulation of cellular biosynthetic process	GO:0031328	0.90152	1	7	AFLA_109820|AFLA_085740|AFLA_122570|AFLA_014490|AFLA_015920|AFLA_101160|AFLA_131330	269	AFLA_085740|AFLA_122570|AFLA_014490|AFLA_131330	4	AFLA_109820|AFLA_015920|AFLA_101160	3	http://amigo.geneontology.org/cgi-bin/amigo/term_details?term=GO:0031328	no
mitotic sister chromatid segregation	GO:0000070	0.90292	1	1	AFLA_047300	59	.	0	AFLA_047300	1	http://amigo.geneontology.org/cgi-bin/amigo/term_details?term=GO:0000070	no
vacuolar transport	GO:0007034	0.90292	1	1	AFLA_047300	59	.	0	AFLA_047300	1	http://amigo.geneontology.org/cgi-bin/amigo/term_details?term=GO:0007034	no
nucleobase-containing compound transport	GO:0015931	0.90377	1	2	AFLA_034340|AFLA_075860	100	AFLA_075860	1	AFLA_034340	1	http://amigo.geneontology.org/cgi-bin/amigo/term_details?term=GO:0015931	no
nucleoside monophosphate biosynthetic process	GO:0009124	0.9067	1	1	AFLA_001850	60	AFLA_001850	1	.	0	http://amigo.geneontology.org/cgi-bin/amigo/term_details?term=GO:0009124	no
sister chromatid segregation	GO:0000819	0.9067	1	1	AFLA_047300	60	.	0	AFLA_047300	1	http://amigo.geneontology.org/cgi-bin/amigo/term_details?term=GO:0000819	no
negative regulation of RNA metabolic process	GO:0051253	0.90704	1	3	AFLA_109820|AFLA_122560|AFLA_093880	138	AFLA_122560	1	AFLA_109820|AFLA_093880	2	http://amigo.geneontology.org/cgi-bin/amigo/term_details?term=GO:0051253	no
nitrogen compound transport	GO:0071705	0.90972	1	8	AFLA_028740|AFLA_034340|AFLA_112960|AFLA_075860|AFLA_040450|AFLA_045770|AFLA_097710|AFLA_138640	305	AFLA_028740|AFLA_112960|AFLA_075860|AFLA_045770	4	AFLA_034340|AFLA_040450|AFLA_097710|AFLA_138640	4	http://amigo.geneontology.org/cgi-bin/amigo/term_details?term=GO:0071705	no
microtubule-based process	GO:0007017	0.90972	1	2	AFLA_124520|AFLA_047300	102	.	0	AFLA_124520|AFLA_047300	2	http://amigo.geneontology.org/cgi-bin/amigo/term_details?term=GO:0007017	no
negative regulation of cell cycle	GO:0045786	0.91034	1	1	AFLA_047300	61	.	0	AFLA_047300	1	http://amigo.geneontology.org/cgi-bin/amigo/term_details?term=GO:0045786	no
protein maturation	GO:0051604	0.91034	1	1	AFLA_003260	61	AFLA_003260	1	.	0	http://amigo.geneontology.org/cgi-bin/amigo/term_details?term=GO:0051604	no
coenzyme metabolic process	GO:0006732	0.91175	1	4	AFLA_106350|AFLA_092640|AFLA_047080|AFLA_103000	175	AFLA_106350|AFLA_092640|AFLA_047080|AFLA_103000	4	.	0	http://amigo.geneontology.org/cgi-bin/amigo/term_details?term=GO:0006732	no
nucleotide metabolic process	GO:0009117	0.91573	1	6	AFLA_012050|AFLA_012080|AFLA_116430|AFLA_092640|AFLA_102850|AFLA_001850	244	AFLA_116430|AFLA_092640|AFLA_102850|AFLA_001850	4	AFLA_012050|AFLA_012080	2	http://amigo.geneontology.org/cgi-bin/amigo/term_details?term=GO:0009117	no
positive regulation of nucleobase-containing compound metabolic process	GO:0045935	0.91573	1	6	AFLA_109820|AFLA_085740|AFLA_122570|AFLA_014490|AFLA_015920|AFLA_131330	244	AFLA_085740|AFLA_122570|AFLA_014490|AFLA_131330	4	AFLA_109820|AFLA_015920	2	http://amigo.geneontology.org/cgi-bin/amigo/term_details?term=GO:0045935	no
establishment or maintenance of cell polarity	GO:0007163	0.91719	1	1	AFLA_052640	63	AFLA_052640	1	.	0	http://amigo.geneontology.org/cgi-bin/amigo/term_details?term=GO:0007163	no
negative regulation of gene expression	GO:0010629	0.91921	1	3	AFLA_109820|AFLA_122560|AFLA_093880	143	AFLA_122560	1	AFLA_109820|AFLA_093880	2	http://amigo.geneontology.org/cgi-bin/amigo/term_details?term=GO:0010629	no
nucleoside phosphate metabolic process	GO:0006753	0.92294	1	6	AFLA_012050|AFLA_012080|AFLA_116430|AFLA_092640|AFLA_102850|AFLA_001850	248	AFLA_116430|AFLA_092640|AFLA_102850|AFLA_001850	4	AFLA_012050|AFLA_012080	2	http://amigo.geneontology.org/cgi-bin/amigo/term_details?term=GO:0006753	no
gene silencing	GO:0016458	0.92352	1	1	AFLA_093880	65	.	0	AFLA_093880	1	http://amigo.geneontology.org/cgi-bin/amigo/term_details?term=GO:0016458	no
pyridine-containing compound metabolic process	GO:0072524	0.92352	1	1	AFLA_092640	65	AFLA_092640	1	.	0	http://amigo.geneontology.org/cgi-bin/amigo/term_details?term=GO:0072524	no
intracellular transport	GO:0046907	0.92595	1	12	AFLA_034340|AFLA_052640|AFLA_056120|AFLA_089900|AFLA_095670|AFLA_038590|AFLA_045960|AFLA_046150|AFLA_047300|AFLA_098430|AFLA_068440|AFLA_069190	440	AFLA_052640|AFLA_056120|AFLA_038590|AFLA_045960|AFLA_046150|AFLA_068440|AFLA_069190	7	AFLA_034340|AFLA_089900|AFLA_095670|AFLA_047300|AFLA_098430	5	http://amigo.geneontology.org/cgi-bin/amigo/term_details?term=GO:0046907	no
filamentous growth	GO:0030447	0.9265	1	1	AFLA_011230	66	AFLA_011230	1	.	0	http://amigo.geneontology.org/cgi-bin/amigo/term_details?term=GO:0030447	no
carboxylic acid transport	GO:0046942	0.92789	1	3	AFLA_112960|AFLA_040450|AFLA_138640	147	AFLA_112960	1	AFLA_040450|AFLA_138640	2	http://amigo.geneontology.org/cgi-bin/amigo/term_details?term=GO:0046942	no
macromolecule biosynthetic process	GO:0009059	0.92925	1	44	AFLA_023420|AFLA_050800|AFLA_026100|AFLA_030140|AFLA_031780|AFLA_034340|AFLA_109820|AFLA_110340|AFLA_111980|AFLA_112090|AFLA_054760|AFLA_056250|AFLA_073340|AFLA_075030|AFLA_075840|AFLA_079880|AFLA_080140|AFLA_082850|AFLA_123350|AFLA_085740|AFLA_086100|AFLA_116430|AFLA_127220|AFLA_122560|AFLA_122570|AFLA_093880|AFLA_128330|AFLA_014490|AFLA_015920|AFLA_021310|AFLA_129420|AFLA_041730|AFLA_043150|AFL…	1365	AFLA_026100|AFLA_110340|AFLA_073340|AFLA_085740|AFLA_086100|AFLA_116430|AFLA_122560|AFLA_122570|AFLA_128330|AFLA_014490|AFLA_045770|AFLA_065850|AFLA_003270|AFLA_131330|AFLA_050300|AFLA_137200	16	AFLA_023420|AFLA_050800|AFLA_030140|AFLA_031780|AFLA_034340|AFLA_109820|AFLA_111980|AFLA_112090|AFLA_054760|AFLA_056250|AFLA_075030|AFLA_075840|AFLA_079880|AFLA_080140|AFLA_082850|AFLA_123350|AFLA_127220|AFLA_093880|AFLA_015920|AFLA_021310|AFLA_129420|AFLA_041730|AFLA_043150|AFLA_044170|AFLA_101160|AFLA_068000|AFLA_002560|AFLA_131470	28	http://amigo.geneontology.org/cgi-bin/amigo/term_details?term=GO:0009059	no
regulation of gene expression, epigenetic	GO:0040029	0.92936	1	1	AFLA_093880	67	.	0	AFLA_093880	1	http://amigo.geneontology.org/cgi-bin/amigo/term_details?term=GO:0040029	no
autophagy	GO:0006914	0.92936	1	1	AFLA_056250	67	.	0	AFLA_056250	1	http://amigo.geneontology.org/cgi-bin/amigo/term_details?term=GO:0006914	no
negative regulation of transcription from RNA polymerase II promoter	GO:0000122	0.92936	1	1	AFLA_122560	67	AFLA_122560	1	.	0	http://amigo.geneontology.org/cgi-bin/amigo/term_details?term=GO:0000122	no
RNA catabolic process	GO:0006401	0.92936	1	1	AFLA_093470	67	AFLA_093470	1	.	0	http://amigo.geneontology.org/cgi-bin/amigo/term_details?term=GO:0006401	no
organic acid transport	GO:0015849	0.92992	1	3	AFLA_112960|AFLA_040450|AFLA_138640	148	AFLA_112960	1	AFLA_040450|AFLA_138640	2	http://amigo.geneontology.org/cgi-bin/amigo/term_details?term=GO:0015849	no
sulfur compound metabolic process	GO:0006790	0.93181	1	4	AFLA_024750|AFLA_035970|AFLA_106350|AFLA_084230	185	AFLA_035970|AFLA_106350	2	AFLA_024750|AFLA_084230	2	http://amigo.geneontology.org/cgi-bin/amigo/term_details?term=GO:0006790	no
response to toxic substance	GO:0009636	0.93212	1	1	AFLA_039360	68	AFLA_039360	1	.	0	http://amigo.geneontology.org/cgi-bin/amigo/term_details?term=GO:0009636	no
aspartate family amino acid biosynthetic process	GO:0009067	0.93212	1	1	AFLA_084230	68	.	0	AFLA_084230	1	http://amigo.geneontology.org/cgi-bin/amigo/term_details?term=GO:0009067	no
protein import	GO:0017038	0.93212	1	1	AFLA_007610	68	AFLA_007610	1	.	0	http://amigo.geneontology.org/cgi-bin/amigo/term_details?term=GO:0017038	no
cellular respiration	GO:0045333	0.93212	1	1	AFLA_049390	68	.	0	AFLA_049390	1	http://amigo.geneontology.org/cgi-bin/amigo/term_details?term=GO:0045333	no
single organism signaling	GO:0044700	0.93259	1	10	AFLA_028740|AFLA_031780|AFLA_052640|AFLA_093230|AFLA_038590|AFLA_102850|AFLA_065850|AFLA_068440|AFLA_003220|AFLA_050300	383	AFLA_028740|AFLA_052640|AFLA_093230|AFLA_038590|AFLA_102850|AFLA_065850|AFLA_068440|AFLA_003220|AFLA_050300	9	AFLA_031780	1	http://amigo.geneontology.org/cgi-bin/amigo/term_details?term=GO:0044700	no
signaling	GO:0023052	0.93259	1	10	AFLA_028740|AFLA_031780|AFLA_052640|AFLA_093230|AFLA_038590|AFLA_102850|AFLA_065850|AFLA_068440|AFLA_003220|AFLA_050300	383	AFLA_028740|AFLA_052640|AFLA_093230|AFLA_038590|AFLA_102850|AFLA_065850|AFLA_068440|AFLA_003220|AFLA_050300	9	AFLA_031780	1	http://amigo.geneontology.org/cgi-bin/amigo/term_details?term=GO:0023052	no
regulation of mitotic cell cycle phase transition	GO:1901990	0.93477	1	1	AFLA_047300	69	.	0	AFLA_047300	1	http://amigo.geneontology.org/cgi-bin/amigo/term_details?term=GO:1901990	no
purine ribonucleoside metabolic process	GO:0046128	0.93672	1	2	AFLA_102850|AFLA_134560	113	AFLA_102850|AFLA_134560	2	.	0	http://amigo.geneontology.org/cgi-bin/amigo/term_details?term=GO:0046128	no
glycerophospholipid biosynthetic process	GO:0046474	0.93731	1	1	AFLA_003220	70	AFLA_003220	1	.	0	http://amigo.geneontology.org/cgi-bin/amigo/term_details?term=GO:0046474	no
regulation of cell cycle phase transition	GO:1901987	0.93731	1	1	AFLA_047300	70	.	0	AFLA_047300	1	http://amigo.geneontology.org/cgi-bin/amigo/term_details?term=GO:1901987	no
ribonucleotide biosynthetic process	GO:0009260	0.93731	1	1	AFLA_001850	70	AFLA_001850	1	.	0	http://amigo.geneontology.org/cgi-bin/amigo/term_details?term=GO:0009260	no
coenzyme biosynthetic process	GO:0009108	0.93876	1	2	AFLA_106350|AFLA_103000	114	AFLA_106350|AFLA_103000	2	.	0	http://amigo.geneontology.org/cgi-bin/amigo/term_details?term=GO:0009108	no
regulation of phosphorylation	GO:0042325	0.93976	1	1	AFLA_034340	71	.	0	AFLA_034340	1	http://amigo.geneontology.org/cgi-bin/amigo/term_details?term=GO:0042325	no
purine ribonucleoside triphosphate metabolic process	GO:0009205	0.93976	1	1	AFLA_102850	71	AFLA_102850	1	.	0	http://amigo.geneontology.org/cgi-bin/amigo/term_details?term=GO:0009205	no
regulation of cell division	GO:0051302	0.93976	1	1	AFLA_047300	71	.	0	AFLA_047300	1	http://amigo.geneontology.org/cgi-bin/amigo/term_details?term=GO:0051302	no
positive regulation of cellular metabolic process	GO:0031325	0.94251	1	8	AFLA_034340|AFLA_109820|AFLA_085740|AFLA_122570|AFLA_014490|AFLA_015920|AFLA_101160|AFLA_131330	327	AFLA_085740|AFLA_122570|AFLA_014490|AFLA_131330	4	AFLA_034340|AFLA_109820|AFLA_015920|AFLA_101160	4	http://amigo.geneontology.org/cgi-bin/amigo/term_details?term=GO:0031325	no
regulation of phosphate metabolic process	GO:0019220	0.94264	1	2	AFLA_034340|AFLA_102850	116	AFLA_102850	1	AFLA_034340	1	http://amigo.geneontology.org/cgi-bin/amigo/term_details?term=GO:0019220	no
regulation of phosphorus metabolic process	GO:0051174	0.94264	1	2	AFLA_034340|AFLA_102850	116	AFLA_102850	1	AFLA_034340	1	http://amigo.geneontology.org/cgi-bin/amigo/term_details?term=GO:0051174	no
cellular localization	GO:0051641	0.94272	1	17	AFLA_028740|AFLA_034340|AFLA_052640|AFLA_056120|AFLA_077030|AFLA_089900|AFLA_095670|AFLA_038590|AFLA_045960|AFLA_046150|AFLA_047300|AFLA_098430|AFLA_068440|AFLA_069190|AFLA_003220|AFLA_050180|AFLA_137060	607	AFLA_028740|AFLA_052640|AFLA_056120|AFLA_038590|AFLA_045960|AFLA_046150|AFLA_068440|AFLA_069190|AFLA_003220|AFLA_137060	10	AFLA_034340|AFLA_077030|AFLA_089900|AFLA_095670|AFLA_047300|AFLA_098430|AFLA_050180	7	http://amigo.geneontology.org/cgi-bin/amigo/term_details?term=GO:0051641	no
purine nucleoside metabolic process	GO:0042278	0.9445	1	2	AFLA_102850|AFLA_134560	117	AFLA_102850|AFLA_134560	2	.	0	http://amigo.geneontology.org/cgi-bin/amigo/term_details?term=GO:0042278	no
negative regulation of cellular macromolecule biosynthetic process	GO:2000113	0.94598	1	3	AFLA_109820|AFLA_122560|AFLA_093880	157	AFLA_122560	1	AFLA_109820|AFLA_093880	2	http://amigo.geneontology.org/cgi-bin/amigo/term_details?term=GO:2000113	no
glycerolipid biosynthetic process	GO:0045017	0.94654	1	1	AFLA_003220	74	AFLA_003220	1	.	0	http://amigo.geneontology.org/cgi-bin/amigo/term_details?term=GO:0045017	no
purine nucleoside triphosphate metabolic process	GO:0009144	0.94654	1	1	AFLA_102850	74	AFLA_102850	1	.	0	http://amigo.geneontology.org/cgi-bin/amigo/term_details?term=GO:0009144	no
negative regulation of cell cycle process	GO:0010948	0.94654	1	1	AFLA_047300	74	.	0	AFLA_047300	1	http://amigo.geneontology.org/cgi-bin/amigo/term_details?term=GO:0010948	no
single-organism cellular process	GO:0044763	0.94714	1	132	AFLA_023420|AFLA_023600|AFLA_024510|AFLA_024520|AFLA_024750|AFLA_024810|AFLA_028740|AFLA_124130|AFLA_030430|AFLA_031780|AFLA_032000|AFLA_032450|AFLA_034340|AFLA_035970|AFLA_036090|AFLA_036110|AFLA_036440|AFLA_106350|AFLA_107840|AFLA_108930|AFLA_052640|AFLA_109820|AFLA_110050|AFLA_110340|AFLA_110890|AFLA_110930|AFLA_110960|AFLA_112010|AFLA_112960|AFLA_056120|AFLA_056250|AFLA_058760|AFLA_059480|AFL…	3727	AFLA_023600|AFLA_028740|AFLA_032000|AFLA_035970|AFLA_106350|AFLA_108930|AFLA_052640|AFLA_110340|AFLA_110890|AFLA_110960|AFLA_112010|AFLA_112960|AFLA_056120|AFLA_062260|AFLA_008850|AFLA_011230|AFLA_073320|AFLA_073340|AFLA_075860|AFLA_077580|AFLA_083110|AFLA_083400|AFLA_085740|AFLA_116430|AFLA_119710|AFLA_120890|AFLA_122560|AFLA_122570|AFLA_092640|AFLA_093230|AFLA_128330|AFLA_014490|AFLA_017580|AFL…	59	AFLA_023420|AFLA_024510|AFLA_024520|AFLA_024750|AFLA_024810|AFLA_124130|AFLA_030430|AFLA_031780|AFLA_032450|AFLA_034340|AFLA_036090|AFLA_036110|AFLA_036440|AFLA_107840|AFLA_109820|AFLA_110050|AFLA_110930|AFLA_056250|AFLA_058760|AFLA_059480|AFLA_060530|AFLA_060700|AFLA_063160|AFLA_063420|AFLA_124520|AFLA_009750|AFLA_012050|AFLA_012080|AFLA_125270|AFLA_075840|AFLA_077030|AFLA_078420|AFLA_079230|AFL…	73	http://amigo.geneontology.org/cgi-bin/amigo/term_details?term=GO:0044763	no
ribose phosphate biosynthetic process	GO:0046390	0.94862	1	1	AFLA_001850	75	AFLA_001850	1	.	0	http://amigo.geneontology.org/cgi-bin/amigo/term_details?term=GO:0046390	no
negative regulation of macromolecule biosynthetic process	GO:0010558	0.94906	1	3	AFLA_109820|AFLA_122560|AFLA_093880	159	AFLA_122560	1	AFLA_109820|AFLA_093880	2	http://amigo.geneontology.org/cgi-bin/amigo/term_details?term=GO:0010558	no
organic cyclic compound biosynthetic process	GO:1901362	0.94917	1	41	AFLA_023420|AFLA_024750|AFLA_026100|AFLA_030250|AFLA_036110|AFLA_109820|AFLA_110890|AFLA_110930|AFLA_058760|AFLA_060700|AFLA_012050|AFLA_012080|AFLA_125270|AFLA_082850|AFLA_085740|AFLA_086100|AFLA_116430|AFLA_118100|AFLA_119710|AFLA_122560|AFLA_122570|AFLA_093230|AFLA_093880|AFLA_128330|AFLA_014490|AFLA_015920|AFLA_021310|AFLA_129420|AFLA_064290|AFLA_065130|AFLA_065570|AFLA_065740|AFLA_065850|AFL…	1309	AFLA_026100|AFLA_030250|AFLA_110890|AFLA_085740|AFLA_086100|AFLA_116430|AFLA_119710|AFLA_122560|AFLA_122570|AFLA_093230|AFLA_128330|AFLA_014490|AFLA_065570|AFLA_065850|AFLA_001850|AFLA_131330|AFLA_050300|AFLA_138560	18	AFLA_023420|AFLA_024750|AFLA_036110|AFLA_109820|AFLA_110930|AFLA_058760|AFLA_060700|AFLA_012050|AFLA_012080|AFLA_125270|AFLA_082850|AFLA_118100|AFLA_093880|AFLA_015920|AFLA_021310|AFLA_129420|AFLA_064290|AFLA_065130|AFLA_065740|AFLA_066210|AFLA_071180|AFLA_002920|AFLA_138050	23	http://amigo.geneontology.org/cgi-bin/amigo/term_details?term=GO:1901362	no
ribonucleoside triphosphate metabolic process	GO:0009199	0.95063	1	1	AFLA_102850	76	AFLA_102850	1	.	0	http://amigo.geneontology.org/cgi-bin/amigo/term_details?term=GO:0009199	no
histone modification	GO:0016570	0.95063	1	1	AFLA_047300	76	.	0	AFLA_047300	1	http://amigo.geneontology.org/cgi-bin/amigo/term_details?term=GO:0016570	no
cell communication	GO:0007154	0.95117	1	14	AFLA_028740|AFLA_031780|AFLA_034340|AFLA_052640|AFLA_056250|AFLA_085740|AFLA_122570|AFLA_093230|AFLA_038590|AFLA_102850|AFLA_065850|AFLA_068440|AFLA_003220|AFLA_050300	525	AFLA_028740|AFLA_052640|AFLA_085740|AFLA_122570|AFLA_093230|AFLA_038590|AFLA_102850|AFLA_065850|AFLA_068440|AFLA_003220|AFLA_050300	11	AFLA_031780|AFLA_034340|AFLA_056250	3	http://amigo.geneontology.org/cgi-bin/amigo/term_details?term=GO:0007154	no
negative regulation of nucleobase-containing compound metabolic process	GO:0045934	0.95197	1	3	AFLA_109820|AFLA_122560|AFLA_093880	161	AFLA_122560	1	AFLA_109820|AFLA_093880	2	http://amigo.geneontology.org/cgi-bin/amigo/term_details?term=GO:0045934	no
signal transduction	GO:0007165	0.9529	1	9	AFLA_031780|AFLA_052640|AFLA_093230|AFLA_038590|AFLA_102850|AFLA_065850|AFLA_068440|AFLA_003220|AFLA_050300	369	AFLA_052640|AFLA_093230|AFLA_038590|AFLA_102850|AFLA_065850|AFLA_068440|AFLA_003220|AFLA_050300	8	AFLA_031780	1	http://amigo.geneontology.org/cgi-bin/amigo/term_details?term=GO:0007165	no
cytoskeleton organization	GO:0007010	0.95472	1	3	AFLA_052640|AFLA_089900|AFLA_047300	163	AFLA_052640	1	AFLA_089900|AFLA_047300	2	http://amigo.geneontology.org/cgi-bin/amigo/term_details?term=GO:0007010	no
organophosphate biosynthetic process	GO:0090407	0.95693	1	6	AFLA_012050|AFLA_012080|AFLA_077580|AFLA_116430|AFLA_001850|AFLA_003220	273	AFLA_077580|AFLA_116430|AFLA_001850|AFLA_003220	4	AFLA_012050|AFLA_012080	2	http://amigo.geneontology.org/cgi-bin/amigo/term_details?term=GO:0090407	no
negative regulation of nitrogen compound metabolic process	GO:0051172	0.95733	1	3	AFLA_109820|AFLA_122560|AFLA_093880	165	AFLA_122560	1	AFLA_109820|AFLA_093880	2	http://amigo.geneontology.org/cgi-bin/amigo/term_details?term=GO:0051172	no
protein glycosylation	GO:0006486	0.9579	1	1	AFLA_110340	80	AFLA_110340	1	.	0	http://amigo.geneontology.org/cgi-bin/amigo/term_details?term=GO:0006486	no
nucleic acid transport	GO:0050657	0.9579	1	1	AFLA_034340	80	.	0	AFLA_034340	1	http://amigo.geneontology.org/cgi-bin/amigo/term_details?term=GO:0050657	no
RNA transport	GO:0050658	0.9579	1	1	AFLA_034340	80	.	0	AFLA_034340	1	http://amigo.geneontology.org/cgi-bin/amigo/term_details?term=GO:0050658	no
establishment of RNA localization	GO:0051236	0.9579	1	1	AFLA_034340	80	.	0	AFLA_034340	1	http://amigo.geneontology.org/cgi-bin/amigo/term_details?term=GO:0051236	no
macromolecule glycosylation	GO:0043413	0.9579	1	1	AFLA_110340	80	AFLA_110340	1	.	0	http://amigo.geneontology.org/cgi-bin/amigo/term_details?term=GO:0043413	no
negative regulation of cellular biosynthetic process	GO:0031327	0.95858	1	3	AFLA_109820|AFLA_122560|AFLA_093880	166	AFLA_122560	1	AFLA_109820|AFLA_093880	2	http://amigo.geneontology.org/cgi-bin/amigo/term_details?term=GO:0031327	no
purine-containing compound metabolic process	GO:0072521	0.95858	1	3	AFLA_023420|AFLA_102850|AFLA_134560	166	AFLA_102850|AFLA_134560	2	AFLA_023420	1	http://amigo.geneontology.org/cgi-bin/amigo/term_details?term=GO:0072521	no
negative regulation of biosynthetic process	GO:0009890	0.95979	1	3	AFLA_109820|AFLA_122560|AFLA_093880	167	AFLA_122560	1	AFLA_109820|AFLA_093880	2	http://amigo.geneontology.org/cgi-bin/amigo/term_details?term=GO:0009890	no
cellular macromolecule biosynthetic process	GO:0034645	0.95995	1	42	AFLA_023420|AFLA_050800|AFLA_026100|AFLA_030140|AFLA_031780|AFLA_034340|AFLA_109820|AFLA_110340|AFLA_111980|AFLA_112090|AFLA_054760|AFLA_056250|AFLA_073340|AFLA_075030|AFLA_075840|AFLA_079880|AFLA_080140|AFLA_082850|AFLA_123350|AFLA_085740|AFLA_086100|AFLA_127220|AFLA_122560|AFLA_122570|AFLA_093880|AFLA_128330|AFLA_014490|AFLA_015920|AFLA_021310|AFLA_129420|AFLA_041730|AFLA_043150|AFLA_044170|AFL…	1356	AFLA_026100|AFLA_110340|AFLA_073340|AFLA_085740|AFLA_086100|AFLA_122560|AFLA_122570|AFLA_128330|AFLA_014490|AFLA_045770|AFLA_065850|AFLA_003270|AFLA_131330|AFLA_050300	14	AFLA_023420|AFLA_050800|AFLA_030140|AFLA_031780|AFLA_034340|AFLA_109820|AFLA_111980|AFLA_112090|AFLA_054760|AFLA_056250|AFLA_075030|AFLA_075840|AFLA_079880|AFLA_080140|AFLA_082850|AFLA_123350|AFLA_127220|AFLA_093880|AFLA_015920|AFLA_021310|AFLA_129420|AFLA_041730|AFLA_043150|AFLA_044170|AFLA_101160|AFLA_068000|AFLA_002560|AFLA_131470	28	http://amigo.geneontology.org/cgi-bin/amigo/term_details?term=GO:0034645	no
negative regulation of biological process	GO:0048519	0.96019	1	9	AFLA_031780|AFLA_109820|AFLA_122560|AFLA_093230|AFLA_093880|AFLA_038590|AFLA_047300|AFLA_102850|AFLA_071180	377	AFLA_122560|AFLA_093230|AFLA_038590|AFLA_102850	4	AFLA_031780|AFLA_109820|AFLA_093880|AFLA_047300|AFLA_071180	5	http://amigo.geneontology.org/cgi-bin/amigo/term_details?term=GO:0048519	no
regulation of macromolecule biosynthetic process	GO:0010556	0.96048	1	20	AFLA_023420|AFLA_026100|AFLA_031780|AFLA_109820|AFLA_075840|AFLA_082850|AFLA_085740|AFLA_122560|AFLA_122570|AFLA_093880|AFLA_128330|AFLA_014490|AFLA_015920|AFLA_129420|AFLA_041730|AFLA_101160|AFLA_065850|AFLA_131330|AFLA_131470|AFLA_050300	720	AFLA_026100|AFLA_085740|AFLA_122560|AFLA_122570|AFLA_128330|AFLA_014490|AFLA_065850|AFLA_131330|AFLA_050300	9	AFLA_023420|AFLA_031780|AFLA_109820|AFLA_075840|AFLA_082850|AFLA_093880|AFLA_015920|AFLA_129420|AFLA_041730|AFLA_101160|AFLA_131470	11	http://amigo.geneontology.org/cgi-bin/amigo/term_details?term=GO:0010556	no
regulation of transcription from RNA polymerase II promoter	GO:0006357	0.96103	1	9	AFLA_026100|AFLA_109820|AFLA_085740|AFLA_122560|AFLA_122570|AFLA_014490|AFLA_015920|AFLA_129420|AFLA_131330	378	AFLA_026100|AFLA_085740|AFLA_122560|AFLA_122570|AFLA_014490|AFLA_131330	6	AFLA_109820|AFLA_015920|AFLA_129420	3	http://amigo.geneontology.org/cgi-bin/amigo/term_details?term=GO:0006357	no
microtubule cytoskeleton organization	GO:0000226	0.96113	1	1	AFLA_047300	82	.	0	AFLA_047300	1	http://amigo.geneontology.org/cgi-bin/amigo/term_details?term=GO:0000226	no
negative regulation of cellular process	GO:0048523	0.96191	1	8	AFLA_031780|AFLA_109820|AFLA_122560|AFLA_093230|AFLA_093880|AFLA_047300|AFLA_102850|AFLA_071180	346	AFLA_122560|AFLA_093230|AFLA_102850	3	AFLA_031780|AFLA_109820|AFLA_093880|AFLA_047300|AFLA_071180	5	http://amigo.geneontology.org/cgi-bin/amigo/term_details?term=GO:0048523	no
membrane lipid metabolic process	GO:0006643	0.96265	1	1	AFLA_003810	83	AFLA_003810	1	.	0	http://amigo.geneontology.org/cgi-bin/amigo/term_details?term=GO:0006643	no
ribonucleoside monophosphate metabolic process	GO:0009161	0.96265	1	1	AFLA_001850	83	AFLA_001850	1	.	0	http://amigo.geneontology.org/cgi-bin/amigo/term_details?term=GO:0009161	no
glycoprotein biosynthetic process	GO:0009101	0.96411	1	1	AFLA_110340	84	AFLA_110340	1	.	0	http://amigo.geneontology.org/cgi-bin/amigo/term_details?term=GO:0009101	no
glycoprotein metabolic process	GO:0009100	0.96411	1	1	AFLA_110340	84	AFLA_110340	1	.	0	http://amigo.geneontology.org/cgi-bin/amigo/term_details?term=GO:0009100	no
intracellular protein transport	GO:0006886	0.96479	1	5	AFLA_056120|AFLA_089900|AFLA_095670|AFLA_038590|AFLA_046150	246	AFLA_056120|AFLA_038590|AFLA_046150	3	AFLA_089900|AFLA_095670	2	http://amigo.geneontology.org/cgi-bin/amigo/term_details?term=GO:0006886	no
mitotic cell cycle phase transition	GO:0044772	0.96551	1	1	AFLA_047300	85	.	0	AFLA_047300	1	http://amigo.geneontology.org/cgi-bin/amigo/term_details?term=GO:0044772	no
regulation of response to stress	GO:0080134	0.96551	1	1	AFLA_071180	85	.	0	AFLA_071180	1	http://amigo.geneontology.org/cgi-bin/amigo/term_details?term=GO:0080134	no
negative regulation of macromolecule metabolic process	GO:0010605	0.96619	1	4	AFLA_109820|AFLA_122560|AFLA_093230|AFLA_093880	211	AFLA_122560|AFLA_093230	2	AFLA_109820|AFLA_093880	2	http://amigo.geneontology.org/cgi-bin/amigo/term_details?term=GO:0010605	no
nucleoside monophosphate metabolic process	GO:0009123	0.96686	1	1	AFLA_001850	86	AFLA_001850	1	.	0	http://amigo.geneontology.org/cgi-bin/amigo/term_details?term=GO:0009123	no
cell cycle phase transition	GO:0044770	0.96686	1	1	AFLA_047300	86	.	0	AFLA_047300	1	http://amigo.geneontology.org/cgi-bin/amigo/term_details?term=GO:0044770	no
regulation of cellular catabolic process	GO:0031329	0.96686	1	1	AFLA_102850	86	AFLA_102850	1	.	0	http://amigo.geneontology.org/cgi-bin/amigo/term_details?term=GO:0031329	no
ribonucleotide metabolic process	GO:0009259	0.96743	1	2	AFLA_102850|AFLA_001850	133	AFLA_102850|AFLA_001850	2	.	0	http://amigo.geneontology.org/cgi-bin/amigo/term_details?term=GO:0009259	no
cofactor metabolic process	GO:0051186	0.96802	1	4	AFLA_106350|AFLA_092640|AFLA_047080|AFLA_103000	213	AFLA_106350|AFLA_092640|AFLA_047080|AFLA_103000	4	.	0	http://amigo.geneontology.org/cgi-bin/amigo/term_details?term=GO:0051186	no
small GTPase mediated signal transduction	GO:0007264	0.96816	1	1	AFLA_102850	87	AFLA_102850	1	.	0	http://amigo.geneontology.org/cgi-bin/amigo/term_details?term=GO:0007264	no
RNA localization	GO:0006403	0.9694	1	1	AFLA_034340	88	.	0	AFLA_034340	1	http://amigo.geneontology.org/cgi-bin/amigo/term_details?term=GO:0006403	no
nucleoside triphosphate metabolic process	GO:0009141	0.9694	1	1	AFLA_102850	88	AFLA_102850	1	.	0	http://amigo.geneontology.org/cgi-bin/amigo/term_details?term=GO:0009141	no
negative regulation of cellular metabolic process	GO:0031324	0.96976	1	4	AFLA_109820|AFLA_122560|AFLA_093230|AFLA_093880	215	AFLA_122560|AFLA_093230	2	AFLA_109820|AFLA_093880	2	http://amigo.geneontology.org/cgi-bin/amigo/term_details?term=GO:0031324	no
chromosome segregation	GO:0007059	0.9706	1	1	AFLA_047300	89	.	0	AFLA_047300	1	http://amigo.geneontology.org/cgi-bin/amigo/term_details?term=GO:0007059	no
cytokinesis	GO:0000910	0.9706	1	1	AFLA_047300	89	.	0	AFLA_047300	1	http://amigo.geneontology.org/cgi-bin/amigo/term_details?term=GO:0000910	no
regulation of protein modification process	GO:0031399	0.97285	1	1	AFLA_034340	91	.	0	AFLA_034340	1	http://amigo.geneontology.org/cgi-bin/amigo/term_details?term=GO:0031399	no
RNA processing	GO:0006396	0.97353	1	10	AFLA_033330|AFLA_035340|AFLA_079160|AFLA_091360|AFLA_093230|AFLA_093470|AFLA_093880|AFLA_044170|AFLA_130100|AFLA_068000	429	AFLA_093230|AFLA_093470	2	AFLA_033330|AFLA_035340|AFLA_079160|AFLA_091360|AFLA_093880|AFLA_044170|AFLA_130100|AFLA_068000	8	http://amigo.geneontology.org/cgi-bin/amigo/term_details?term=GO:0006396	no
regulation of gene expression	GO:0010468	0.97354	1	20	AFLA_023420|AFLA_026100|AFLA_031780|AFLA_109820|AFLA_082850|AFLA_085740|AFLA_122560|AFLA_122570|AFLA_093880|AFLA_128330|AFLA_014490|AFLA_015920|AFLA_038590|AFLA_129420|AFLA_041730|AFLA_101160|AFLA_065850|AFLA_131330|AFLA_131470|AFLA_050300	744	AFLA_026100|AFLA_085740|AFLA_122560|AFLA_122570|AFLA_128330|AFLA_014490|AFLA_038590|AFLA_065850|AFLA_131330|AFLA_050300	10	AFLA_023420|AFLA_031780|AFLA_109820|AFLA_082850|AFLA_093880|AFLA_015920|AFLA_129420|AFLA_041730|AFLA_101160|AFLA_131470	10	http://amigo.geneontology.org/cgi-bin/amigo/term_details?term=GO:0010468	no
regulation of cellular macromolecule biosynthetic process	GO:2000112	0.97424	1	19	AFLA_023420|AFLA_026100|AFLA_031780|AFLA_109820|AFLA_082850|AFLA_085740|AFLA_122560|AFLA_122570|AFLA_093880|AFLA_128330|AFLA_014490|AFLA_015920|AFLA_129420|AFLA_041730|AFLA_101160|AFLA_065850|AFLA_131330|AFLA_131470|AFLA_050300	715	AFLA_026100|AFLA_085740|AFLA_122560|AFLA_122570|AFLA_128330|AFLA_014490|AFLA_065850|AFLA_131330|AFLA_050300	9	AFLA_023420|AFLA_031780|AFLA_109820|AFLA_082850|AFLA_093880|AFLA_015920|AFLA_129420|AFLA_041730|AFLA_101160|AFLA_131470	10	http://amigo.geneontology.org/cgi-bin/amigo/term_details?term=GO:2000112	no
ribose phosphate metabolic process	GO:0019693	0.9743	1	2	AFLA_102850|AFLA_001850	140	AFLA_102850|AFLA_001850	2	.	0	http://amigo.geneontology.org/cgi-bin/amigo/term_details?term=GO:0019693	no
cofactor biosynthetic process	GO:0051188	0.9743	1	2	AFLA_106350|AFLA_103000	140	AFLA_106350|AFLA_103000	2	.	0	http://amigo.geneontology.org/cgi-bin/amigo/term_details?term=GO:0051188	no
regulation of macromolecule metabolic process	GO:0060255	0.97496	1	24	AFLA_023420|AFLA_026100|AFLA_031780|AFLA_034340|AFLA_109820|AFLA_073340|AFLA_075840|AFLA_082850|AFLA_085740|AFLA_122560|AFLA_122570|AFLA_093230|AFLA_093880|AFLA_128330|AFLA_014490|AFLA_015920|AFLA_038590|AFLA_129420|AFLA_041730|AFLA_101160|AFLA_065850|AFLA_131330|AFLA_131470|AFLA_050300	868	AFLA_026100|AFLA_073340|AFLA_085740|AFLA_122560|AFLA_122570|AFLA_093230|AFLA_128330|AFLA_014490|AFLA_038590|AFLA_065850|AFLA_131330|AFLA_050300	12	AFLA_023420|AFLA_031780|AFLA_034340|AFLA_109820|AFLA_075840|AFLA_082850|AFLA_093880|AFLA_015920|AFLA_129420|AFLA_041730|AFLA_101160|AFLA_131470	12	http://amigo.geneontology.org/cgi-bin/amigo/term_details?term=GO:0060255	no
regulation of cellular component organization	GO:0051128	0.97497	1	5	AFLA_052640|AFLA_056120|AFLA_075840|AFLA_123350|AFLA_047300	259	AFLA_052640|AFLA_056120	2	AFLA_075840|AFLA_123350|AFLA_047300	3	http://amigo.geneontology.org/cgi-bin/amigo/term_details?term=GO:0051128	no
glycerophospholipid metabolic process	GO:0006650	0.97592	1	1	AFLA_003220	94	AFLA_003220	1	.	0	http://amigo.geneontology.org/cgi-bin/amigo/term_details?term=GO:0006650	no
regulation of biosynthetic process	GO:0009889	0.97615	1	20	AFLA_023420|AFLA_026100|AFLA_031780|AFLA_109820|AFLA_075840|AFLA_082850|AFLA_085740|AFLA_122560|AFLA_122570|AFLA_093880|AFLA_128330|AFLA_014490|AFLA_015920|AFLA_129420|AFLA_041730|AFLA_101160|AFLA_065850|AFLA_131330|AFLA_131470|AFLA_050300	750	AFLA_026100|AFLA_085740|AFLA_122560|AFLA_122570|AFLA_128330|AFLA_014490|AFLA_065850|AFLA_131330|AFLA_050300	9	AFLA_023420|AFLA_031780|AFLA_109820|AFLA_075840|AFLA_082850|AFLA_093880|AFLA_015920|AFLA_129420|AFLA_041730|AFLA_101160|AFLA_131470	11	http://amigo.geneontology.org/cgi-bin/amigo/term_details?term=GO:0009889	no
phosphorylation	GO:0016310	0.97671	1	3	AFLA_034340|AFLA_047300|AFLA_065850	185	AFLA_065850	1	AFLA_034340|AFLA_047300	2	http://amigo.geneontology.org/cgi-bin/amigo/term_details?term=GO:0016310	no
RNA splicing, via transesterification reactions with bulged adenosine as nucleophile	GO:0000377	0.97686	1	1	AFLA_130100	95	.	0	AFLA_130100	1	http://amigo.geneontology.org/cgi-bin/amigo/term_details?term=GO:0000377	no
RNA splicing, via transesterification reactions	GO:0000375	0.97686	1	1	AFLA_130100	95	.	0	AFLA_130100	1	http://amigo.geneontology.org/cgi-bin/amigo/term_details?term=GO:0000375	no
mRNA splicing, via spliceosome	GO:0000398	0.97686	1	1	AFLA_130100	95	.	0	AFLA_130100	1	http://amigo.geneontology.org/cgi-bin/amigo/term_details?term=GO:0000398	no
regulation of catabolic process	GO:0009894	0.97686	1	1	AFLA_102850	95	AFLA_102850	1	.	0	http://amigo.geneontology.org/cgi-bin/amigo/term_details?term=GO:0009894	no
regulation of primary metabolic process	GO:0080090	0.97693	1	24	AFLA_023420|AFLA_026100|AFLA_031780|AFLA_034340|AFLA_109820|AFLA_073340|AFLA_075840|AFLA_082850|AFLA_085740|AFLA_122560|AFLA_122570|AFLA_093230|AFLA_093880|AFLA_128330|AFLA_014490|AFLA_015920|AFLA_129420|AFLA_041730|AFLA_101160|AFLA_102850|AFLA_065850|AFLA_131330|AFLA_131470|AFLA_050300	873	AFLA_026100|AFLA_073340|AFLA_085740|AFLA_122560|AFLA_122570|AFLA_093230|AFLA_128330|AFLA_014490|AFLA_102850|AFLA_065850|AFLA_131330|AFLA_050300	12	AFLA_023420|AFLA_031780|AFLA_034340|AFLA_109820|AFLA_075840|AFLA_082850|AFLA_093880|AFLA_015920|AFLA_129420|AFLA_041730|AFLA_101160|AFLA_131470	12	http://amigo.geneontology.org/cgi-bin/amigo/term_details?term=GO:0080090	no
meiotic cell cycle	GO:0051321	0.9781	1	3	AFLA_066700|AFLA_003220|AFLA_137060	187	AFLA_003220|AFLA_137060	2	AFLA_066700	1	http://amigo.geneontology.org/cgi-bin/amigo/term_details?term=GO:0051321	no
negative regulation of metabolic process	GO:0009892	0.97847	1	4	AFLA_109820|AFLA_122560|AFLA_093230|AFLA_093880	227	AFLA_122560|AFLA_093230	2	AFLA_109820|AFLA_093880	2	http://amigo.geneontology.org/cgi-bin/amigo/term_details?term=GO:0009892	no
positive regulation of cellular process	GO:0048522	0.97879	1	12	AFLA_028740|AFLA_034340|AFLA_109820|AFLA_075840|AFLA_085740|AFLA_122570|AFLA_014490|AFLA_015920|AFLA_101160|AFLA_068440|AFLA_071180|AFLA_131330	505	AFLA_028740|AFLA_085740|AFLA_122570|AFLA_014490|AFLA_068440|AFLA_131330	6	AFLA_034340|AFLA_109820|AFLA_075840|AFLA_015920|AFLA_101160|AFLA_071180	6	http://amigo.geneontology.org/cgi-bin/amigo/term_details?term=GO:0048522	no
transcription from RNA polymerase II promoter	GO:0006366	0.9794	1	9	AFLA_026100|AFLA_109820|AFLA_085740|AFLA_122560|AFLA_122570|AFLA_014490|AFLA_015920|AFLA_129420|AFLA_131330	407	AFLA_026100|AFLA_085740|AFLA_122560|AFLA_122570|AFLA_014490|AFLA_131330	6	AFLA_109820|AFLA_015920|AFLA_129420	3	http://amigo.geneontology.org/cgi-bin/amigo/term_details?term=GO:0006366	no
regulation of mitotic cell cycle	GO:0007346	0.97948	1	1	AFLA_047300	98	.	0	AFLA_047300	1	http://amigo.geneontology.org/cgi-bin/amigo/term_details?term=GO:0007346	no
protein metabolic process	GO:0019538	0.98006	1	32	AFLA_050800|AFLA_030140|AFLA_031780|AFLA_034340|AFLA_110340|AFLA_111980|AFLA_112090|AFLA_054760|AFLA_056250|AFLA_075030|AFLA_075860|AFLA_079880|AFLA_080140|AFLA_082200|AFLA_127220|AFLA_092640|AFLA_093230|AFLA_041730|AFLA_043150|AFLA_044170|AFLA_045250|AFLA_045770|AFLA_047300|AFLA_101160|AFLA_065850|AFLA_067450|AFLA_068000|AFLA_002560|AFLA_003260|AFLA_003270|AFLA_131470|AFLA_137760	1119	AFLA_110340|AFLA_075860|AFLA_092640|AFLA_093230|AFLA_045250|AFLA_045770|AFLA_065850|AFLA_067450|AFLA_003260|AFLA_003270|AFLA_137760	11	AFLA_050800|AFLA_030140|AFLA_031780|AFLA_034340|AFLA_111980|AFLA_112090|AFLA_054760|AFLA_056250|AFLA_075030|AFLA_079880|AFLA_080140|AFLA_082200|AFLA_127220|AFLA_041730|AFLA_043150|AFLA_044170|AFLA_047300|AFLA_101160|AFLA_068000|AFLA_002560|AFLA_131470	21	http://amigo.geneontology.org/cgi-bin/amigo/term_details?term=GO:0019538	no
primary metabolic process	GO:0044238	0.98088	1	131	AFLA_023420|AFLA_023490|AFLA_050800|AFLA_026100|AFLA_029780|AFLA_030140|AFLA_030250|AFLA_030430|AFLA_031380|AFLA_031780|AFLA_033330|AFLA_034340|AFLA_035030|AFLA_035340|AFLA_035970|AFLA_036090|AFLA_036110|AFLA_036440|AFLA_106350|AFLA_107840|AFLA_108930|AFLA_109820|AFLA_110340|AFLA_110930|AFLA_110960|AFLA_111980|AFLA_112010|AFLA_112090|AFLA_054760|AFLA_056250|AFLA_060530|AFLA_060700|AFLA_063040|AFL…	3790	AFLA_023490|AFLA_026100|AFLA_029780|AFLA_030250|AFLA_031380|AFLA_035030|AFLA_035970|AFLA_106350|AFLA_108930|AFLA_110340|AFLA_110960|AFLA_112010|AFLA_054470|AFLA_011230|AFLA_073320|AFLA_073340|AFLA_073770|AFLA_075860|AFLA_077580|AFLA_078120|AFLA_085740|AFLA_086100|AFLA_087870|AFLA_116430|AFLA_119710|AFLA_121370|AFLA_122560|AFLA_122570|AFLA_092640|AFLA_093230|AFLA_093470|AFLA_094850|AFLA_128330|AFL…	59	AFLA_023420|AFLA_050800|AFLA_030140|AFLA_030430|AFLA_031780|AFLA_033330|AFLA_034340|AFLA_035340|AFLA_036090|AFLA_036110|AFLA_036440|AFLA_107840|AFLA_109820|AFLA_110930|AFLA_111980|AFLA_112090|AFLA_054760|AFLA_056250|AFLA_060530|AFLA_060700|AFLA_063040|AFLA_063680|AFLA_124470|AFLA_012050|AFLA_012080|AFLA_074520|AFLA_075030|AFLA_075840|AFLA_079160|AFLA_079230|AFLA_125700|AFLA_079880|AFLA_080140|AFL…	72	http://amigo.geneontology.org/cgi-bin/amigo/term_details?term=GO:0044238	no
organophosphate metabolic process	GO:0019637	0.9809	1	10	AFLA_110960|AFLA_012050|AFLA_012080|AFLA_077580|AFLA_116430|AFLA_092640|AFLA_102850|AFLA_001850|AFLA_003220|AFLA_003810	444	AFLA_110960|AFLA_077580|AFLA_116430|AFLA_092640|AFLA_102850|AFLA_001850|AFLA_003220|AFLA_003810	8	AFLA_012050|AFLA_012080	2	http://amigo.geneontology.org/cgi-bin/amigo/term_details?term=GO:0019637	no
positive regulation of cellular component organization	GO:0051130	0.98105	1	1	AFLA_075840	100	.	0	AFLA_075840	1	http://amigo.geneontology.org/cgi-bin/amigo/term_details?term=GO:0051130	no
macromolecule catabolic process	GO:0009057	0.98201	1	11	AFLA_023490|AFLA_031380|AFLA_063040|AFLA_063680|AFLA_054470|AFLA_081980|AFLA_082200|AFLA_087870|AFLA_122400|AFLA_093470|AFLA_070170	480	AFLA_023490|AFLA_031380|AFLA_054470|AFLA_087870|AFLA_093470	5	AFLA_063040|AFLA_063680|AFLA_081980|AFLA_082200|AFLA_122400|AFLA_070170	6	http://amigo.geneontology.org/cgi-bin/amigo/term_details?term=GO:0009057	no
positive regulation of biological process	GO:0048518	0.98257	1	13	AFLA_028740|AFLA_034340|AFLA_109820|AFLA_075840|AFLA_085740|AFLA_122570|AFLA_014490|AFLA_015920|AFLA_038590|AFLA_101160|AFLA_068440|AFLA_071180|AFLA_131330	547	AFLA_028740|AFLA_085740|AFLA_122570|AFLA_014490|AFLA_038590|AFLA_068440|AFLA_131330	7	AFLA_034340|AFLA_109820|AFLA_075840|AFLA_015920|AFLA_101160|AFLA_071180	6	http://amigo.geneontology.org/cgi-bin/amigo/term_details?term=GO:0048518	no
gene expression	GO:0010467	0.98287	1	46	AFLA_023420|AFLA_050800|AFLA_026100|AFLA_030140|AFLA_031780|AFLA_033330|AFLA_034340|AFLA_035340|AFLA_109820|AFLA_111980|AFLA_112090|AFLA_054760|AFLA_056250|AFLA_075030|AFLA_079160|AFLA_079880|AFLA_080140|AFLA_082850|AFLA_085740|AFLA_086100|AFLA_127220|AFLA_122560|AFLA_122570|AFLA_091360|AFLA_093230|AFLA_093470|AFLA_093880|AFLA_128330|AFLA_014490|AFLA_015920|AFLA_021310|AFLA_038590|AFLA_129420|AFL…	1532	AFLA_026100|AFLA_085740|AFLA_086100|AFLA_122560|AFLA_122570|AFLA_093230|AFLA_093470|AFLA_128330|AFLA_014490|AFLA_038590|AFLA_045770|AFLA_065850|AFLA_003260|AFLA_131330|AFLA_050300	15	AFLA_023420|AFLA_050800|AFLA_030140|AFLA_031780|AFLA_033330|AFLA_034340|AFLA_035340|AFLA_109820|AFLA_111980|AFLA_112090|AFLA_054760|AFLA_056250|AFLA_075030|AFLA_079160|AFLA_079880|AFLA_080140|AFLA_082850|AFLA_127220|AFLA_091360|AFLA_093880|AFLA_015920|AFLA_021310|AFLA_129420|AFLA_041730|AFLA_043150|AFLA_044170|AFLA_130100|AFLA_101160|AFLA_068000|AFLA_002560|AFLA_131470	31	http://amigo.geneontology.org/cgi-bin/amigo/term_details?term=GO:0010467	no
regulation of metabolic process	GO:0019222	0.98477	1	26	AFLA_023420|AFLA_026100|AFLA_031780|AFLA_034340|AFLA_109820|AFLA_073340|AFLA_075840|AFLA_082850|AFLA_085740|AFLA_122560|AFLA_122570|AFLA_093230|AFLA_093880|AFLA_128330|AFLA_014490|AFLA_015920|AFLA_018500|AFLA_038590|AFLA_129420|AFLA_041730|AFLA_101160|AFLA_102850|AFLA_065850|AFLA_131330|AFLA_131470|AFLA_050300	958	AFLA_026100|AFLA_073340|AFLA_085740|AFLA_122560|AFLA_122570|AFLA_093230|AFLA_128330|AFLA_014490|AFLA_018500|AFLA_038590|AFLA_102850|AFLA_065850|AFLA_131330|AFLA_050300	14	AFLA_023420|AFLA_031780|AFLA_034340|AFLA_109820|AFLA_075840|AFLA_082850|AFLA_093880|AFLA_015920|AFLA_129420|AFLA_041730|AFLA_101160|AFLA_131470	12	http://amigo.geneontology.org/cgi-bin/amigo/term_details?term=GO:0019222	no
regulation of nitrogen compound metabolic process	GO:0051171	0.98477	1	18	AFLA_023420|AFLA_026100|AFLA_109820|AFLA_073340|AFLA_075840|AFLA_082850|AFLA_085740|AFLA_122560|AFLA_122570|AFLA_093880|AFLA_128330|AFLA_014490|AFLA_015920|AFLA_129420|AFLA_102850|AFLA_065850|AFLA_131330|AFLA_050300	713	AFLA_026100|AFLA_073340|AFLA_085740|AFLA_122560|AFLA_122570|AFLA_128330|AFLA_014490|AFLA_102850|AFLA_065850|AFLA_131330|AFLA_050300	11	AFLA_023420|AFLA_109820|AFLA_075840|AFLA_082850|AFLA_093880|AFLA_015920|AFLA_129420	7	http://amigo.geneontology.org/cgi-bin/amigo/term_details?term=GO:0051171	no
regulation of cellular biosynthetic process	GO:0031326	0.985	1	19	AFLA_023420|AFLA_026100|AFLA_031780|AFLA_109820|AFLA_082850|AFLA_085740|AFLA_122560|AFLA_122570|AFLA_093880|AFLA_128330|AFLA_014490|AFLA_015920|AFLA_129420|AFLA_041730|AFLA_101160|AFLA_065850|AFLA_131330|AFLA_131470|AFLA_050300	745	AFLA_026100|AFLA_085740|AFLA_122560|AFLA_122570|AFLA_128330|AFLA_014490|AFLA_065850|AFLA_131330|AFLA_050300	9	AFLA_023420|AFLA_031780|AFLA_109820|AFLA_082850|AFLA_093880|AFLA_015920|AFLA_129420|AFLA_041730|AFLA_101160|AFLA_131470	10	http://amigo.geneontology.org/cgi-bin/amigo/term_details?term=GO:0031326	no
regulation of RNA biosynthetic process	GO:2001141	0.98505	1	15	AFLA_023420|AFLA_026100|AFLA_109820|AFLA_082850|AFLA_085740|AFLA_122560|AFLA_122570|AFLA_093880|AFLA_128330|AFLA_014490|AFLA_015920|AFLA_129420|AFLA_065850|AFLA_131330|AFLA_050300	619	AFLA_026100|AFLA_085740|AFLA_122560|AFLA_122570|AFLA_128330|AFLA_014490|AFLA_065850|AFLA_131330|AFLA_050300	9	AFLA_023420|AFLA_109820|AFLA_082850|AFLA_093880|AFLA_015920|AFLA_129420	6	http://amigo.geneontology.org/cgi-bin/amigo/term_details?term=GO:2001141	no
regulation of transcription, DNA-templated	GO:0006355	0.98505	1	15	AFLA_023420|AFLA_026100|AFLA_109820|AFLA_082850|AFLA_085740|AFLA_122560|AFLA_122570|AFLA_093880|AFLA_128330|AFLA_014490|AFLA_015920|AFLA_129420|AFLA_065850|AFLA_131330|AFLA_050300	619	AFLA_026100|AFLA_085740|AFLA_122560|AFLA_122570|AFLA_128330|AFLA_014490|AFLA_065850|AFLA_131330|AFLA_050300	9	AFLA_023420|AFLA_109820|AFLA_082850|AFLA_093880|AFLA_015920|AFLA_129420	6	http://amigo.geneontology.org/cgi-bin/amigo/term_details?term=GO:0006355	no
glycerolipid metabolic process	GO:0046486	0.9851	1	1	AFLA_003220	106	AFLA_003220	1	.	0	http://amigo.geneontology.org/cgi-bin/amigo/term_details?term=GO:0046486	no
DNA replication	GO:0006260	0.98568	1	1	AFLA_073340	107	AFLA_073340	1	.	0	http://amigo.geneontology.org/cgi-bin/amigo/term_details?term=GO:0006260	no
organic substance transport	GO:0071702	0.98574	1	23	AFLA_028740|AFLA_034340|AFLA_106750|AFLA_112960|AFLA_056120|AFLA_007610|AFLA_075860|AFLA_080990|AFLA_089900|AFLA_095670|AFLA_038590|AFLA_040450|AFLA_043090|AFLA_045770|AFLA_046150|AFLA_097330|AFLA_097710|AFLA_069190|AFLA_003050|AFLA_003810|AFLA_131830|AFLA_137060|AFLA_138640	871	AFLA_028740|AFLA_112960|AFLA_056120|AFLA_007610|AFLA_075860|AFLA_038590|AFLA_045770|AFLA_046150|AFLA_069190|AFLA_003050|AFLA_003810|AFLA_137060	12	AFLA_034340|AFLA_106750|AFLA_080990|AFLA_089900|AFLA_095670|AFLA_040450|AFLA_043090|AFLA_097330|AFLA_097710|AFLA_131830|AFLA_138640	11	http://amigo.geneontology.org/cgi-bin/amigo/term_details?term=GO:0071702	no
regulation of organelle organization	GO:0033043	0.98663	1	2	AFLA_056120|AFLA_047300	159	AFLA_056120	1	AFLA_047300	1	http://amigo.geneontology.org/cgi-bin/amigo/term_details?term=GO:0033043	no
cellular protein metabolic process	GO:0044267	0.98737	1	29	AFLA_050800|AFLA_030140|AFLA_031780|AFLA_034340|AFLA_110340|AFLA_111980|AFLA_112090|AFLA_054760|AFLA_056250|AFLA_075030|AFLA_075860|AFLA_079880|AFLA_080140|AFLA_127220|AFLA_092640|AFLA_093230|AFLA_041730|AFLA_043150|AFLA_044170|AFLA_045250|AFLA_045770|AFLA_047300|AFLA_101160|AFLA_065850|AFLA_067450|AFLA_068000|AFLA_002560|AFLA_003270|AFLA_131470	1059	AFLA_110340|AFLA_075860|AFLA_092640|AFLA_093230|AFLA_045250|AFLA_045770|AFLA_065850|AFLA_067450|AFLA_003270	9	AFLA_050800|AFLA_030140|AFLA_031780|AFLA_034340|AFLA_111980|AFLA_112090|AFLA_054760|AFLA_056250|AFLA_075030|AFLA_079880|AFLA_080140|AFLA_127220|AFLA_041730|AFLA_043150|AFLA_044170|AFLA_047300|AFLA_101160|AFLA_068000|AFLA_002560|AFLA_131470	20	http://amigo.geneontology.org/cgi-bin/amigo/term_details?term=GO:0044267	no
peptidyl-amino acid modification	GO:0018193	0.9878	1	1	AFLA_047300	111	.	0	AFLA_047300	1	http://amigo.geneontology.org/cgi-bin/amigo/term_details?term=GO:0018193	no
cellular response to stimulus	GO:0051716	0.98887	1	25	AFLA_024750|AFLA_028740|AFLA_030430|AFLA_031780|AFLA_034340|AFLA_052640|AFLA_109820|AFLA_056250|AFLA_063160|AFLA_075840|AFLA_075860|AFLA_085740|AFLA_122570|AFLA_093230|AFLA_017580|AFLA_038590|AFLA_098430|AFLA_102850|AFLA_065850|AFLA_068440|AFLA_003220|AFLA_003810|AFLA_131330|AFLA_050180|AFLA_050300	946	AFLA_028740|AFLA_052640|AFLA_075860|AFLA_085740|AFLA_122570|AFLA_093230|AFLA_017580|AFLA_038590|AFLA_102850|AFLA_065850|AFLA_068440|AFLA_003220|AFLA_003810|AFLA_131330|AFLA_050300	15	AFLA_024750|AFLA_030430|AFLA_031780|AFLA_034340|AFLA_109820|AFLA_056250|AFLA_063160|AFLA_075840|AFLA_098430|AFLA_050180	10	http://amigo.geneontology.org/cgi-bin/amigo/term_details?term=GO:0051716	no
regulation of RNA metabolic process	GO:0051252	0.98919	1	15	AFLA_023420|AFLA_026100|AFLA_109820|AFLA_082850|AFLA_085740|AFLA_122560|AFLA_122570|AFLA_093880|AFLA_128330|AFLA_014490|AFLA_015920|AFLA_129420|AFLA_065850|AFLA_131330|AFLA_050300	635	AFLA_026100|AFLA_085740|AFLA_122560|AFLA_122570|AFLA_128330|AFLA_014490|AFLA_065850|AFLA_131330|AFLA_050300	9	AFLA_023420|AFLA_109820|AFLA_082850|AFLA_093880|AFLA_015920|AFLA_129420	6	http://amigo.geneontology.org/cgi-bin/amigo/term_details?term=GO:0051252	no
purine ribonucleotide metabolic process	GO:0009150	0.98961	1	1	AFLA_102850	115	AFLA_102850	1	.	0	http://amigo.geneontology.org/cgi-bin/amigo/term_details?term=GO:0009150	no
regulation of nucleobase-containing compound metabolic process	GO:0019219	0.98998	1	17	AFLA_023420|AFLA_026100|AFLA_109820|AFLA_073340|AFLA_082850|AFLA_085740|AFLA_122560|AFLA_122570|AFLA_093880|AFLA_128330|AFLA_014490|AFLA_015920|AFLA_129420|AFLA_102850|AFLA_065850|AFLA_131330|AFLA_050300	703	AFLA_026100|AFLA_073340|AFLA_085740|AFLA_122560|AFLA_122570|AFLA_128330|AFLA_014490|AFLA_102850|AFLA_065850|AFLA_131330|AFLA_050300	11	AFLA_023420|AFLA_109820|AFLA_082850|AFLA_093880|AFLA_015920|AFLA_129420	6	http://amigo.geneontology.org/cgi-bin/amigo/term_details?term=GO:0019219	no
cellular component organization or biogenesis	GO:0071840	0.98999	1	43	AFLA_027970|AFLA_030140|AFLA_031780|AFLA_034340|AFLA_035340|AFLA_037860|AFLA_052640|AFLA_111980|AFLA_112090|AFLA_056120|AFLA_056250|AFLA_011230|AFLA_075840|AFLA_075860|AFLA_077580|AFLA_078120|AFLA_079160|AFLA_080140|AFLA_123350|AFLA_087880|AFLA_121370|AFLA_089900|AFLA_093230|AFLA_093880|AFLA_038590|AFLA_041730|AFLA_044170|AFLA_046150|AFLA_130100|AFLA_047300|AFLA_098430|AFLA_066700|AFLA_068000|AFL…	1483	AFLA_027970|AFLA_052640|AFLA_056120|AFLA_011230|AFLA_075860|AFLA_077580|AFLA_078120|AFLA_087880|AFLA_121370|AFLA_093230|AFLA_038590|AFLA_046150|AFLA_069190|AFLA_071500|AFLA_003220|AFLA_003270|AFLA_131330|AFLA_137060|AFLA_137200	19	AFLA_030140|AFLA_031780|AFLA_034340|AFLA_035340|AFLA_037860|AFLA_111980|AFLA_112090|AFLA_056250|AFLA_075840|AFLA_079160|AFLA_080140|AFLA_123350|AFLA_089900|AFLA_093880|AFLA_041730|AFLA_044170|AFLA_130100|AFLA_047300|AFLA_098430|AFLA_066700|AFLA_068000|AFLA_070170|AFLA_005180|AFLA_131470	24	http://amigo.geneontology.org/cgi-bin/amigo/term_details?term=GO:0071840	no
cellular protein localization	GO:0034613	0.99001	1	7	AFLA_052640|AFLA_056120|AFLA_089900|AFLA_095670|AFLA_038590|AFLA_046150|AFLA_047300	367	AFLA_052640|AFLA_056120|AFLA_038590|AFLA_046150	4	AFLA_089900|AFLA_095670|AFLA_047300	3	http://amigo.geneontology.org/cgi-bin/amigo/term_details?term=GO:0034613	no
covalent chromatin modification	GO:0016569	0.99041	1	1	AFLA_047300	117	.	0	AFLA_047300	1	http://amigo.geneontology.org/cgi-bin/amigo/term_details?term=GO:0016569	no
regulation of cell cycle process	GO:0010564	0.99078	1	1	AFLA_047300	118	.	0	AFLA_047300	1	http://amigo.geneontology.org/cgi-bin/amigo/term_details?term=GO:0010564	no
protein complex subunit organization	GO:0071822	0.99096	1	5	AFLA_052640|AFLA_089900|AFLA_093230|AFLA_047300|AFLA_005180	296	AFLA_052640|AFLA_093230	2	AFLA_089900|AFLA_047300|AFLA_005180	3	http://amigo.geneontology.org/cgi-bin/amigo/term_details?term=GO:0071822	no
biological regulation	GO:0065007	0.99101	1	48	AFLA_023420|AFLA_026100|AFLA_028740|AFLA_031780|AFLA_032000|AFLA_034340|AFLA_052640|AFLA_109820|AFLA_056120|AFLA_009750|AFLA_073340|AFLA_075840|AFLA_075860|AFLA_077030|AFLA_082850|AFLA_123350|AFLA_085740|AFLA_126510|AFLA_122560|AFLA_122570|AFLA_093230|AFLA_093880|AFLA_128330|AFLA_014490|AFLA_015920|AFLA_018500|AFLA_038590|AFLA_129420|AFLA_129430|AFLA_041730|AFLA_046150|AFLA_047300|AFLA_098430|AFL…	1633	AFLA_026100|AFLA_028740|AFLA_032000|AFLA_052640|AFLA_056120|AFLA_073340|AFLA_075860|AFLA_085740|AFLA_122560|AFLA_122570|AFLA_093230|AFLA_128330|AFLA_014490|AFLA_018500|AFLA_038590|AFLA_129430|AFLA_046150|AFLA_102850|AFLA_065850|AFLA_068440|AFLA_069190|AFLA_003220|AFLA_003810|AFLA_131330|AFLA_050300	25	AFLA_023420|AFLA_031780|AFLA_034340|AFLA_109820|AFLA_009750|AFLA_075840|AFLA_077030|AFLA_082850|AFLA_123350|AFLA_126510|AFLA_093880|AFLA_015920|AFLA_129420|AFLA_041730|AFLA_047300|AFLA_098430|AFLA_099270|AFLA_099280|AFLA_101160|AFLA_071180|AFLA_003980|AFLA_131470|AFLA_050180	23	http://amigo.geneontology.org/cgi-bin/amigo/term_details?term=GO:0065007	no
regulation of cellular metabolic process	GO:0031323	0.99123	1	23	AFLA_023420|AFLA_026100|AFLA_031780|AFLA_034340|AFLA_109820|AFLA_073340|AFLA_082850|AFLA_085740|AFLA_122560|AFLA_122570|AFLA_093230|AFLA_093880|AFLA_128330|AFLA_014490|AFLA_015920|AFLA_129420|AFLA_041730|AFLA_101160|AFLA_102850|AFLA_065850|AFLA_131330|AFLA_131470|AFLA_050300	898	AFLA_026100|AFLA_073340|AFLA_085740|AFLA_122560|AFLA_122570|AFLA_093230|AFLA_128330|AFLA_014490|AFLA_102850|AFLA_065850|AFLA_131330|AFLA_050300	12	AFLA_023420|AFLA_031780|AFLA_034340|AFLA_109820|AFLA_082850|AFLA_093880|AFLA_015920|AFLA_129420|AFLA_041730|AFLA_101160|AFLA_131470	11	http://amigo.geneontology.org/cgi-bin/amigo/term_details?term=GO:0031323	no
cellular macromolecule localization	GO:0070727	0.99167	1	7	AFLA_052640|AFLA_056120|AFLA_089900|AFLA_095670|AFLA_038590|AFLA_046150|AFLA_047300	374	AFLA_052640|AFLA_056120|AFLA_038590|AFLA_046150	4	AFLA_089900|AFLA_095670|AFLA_047300	3	http://amigo.geneontology.org/cgi-bin/amigo/term_details?term=GO:0070727	no
purine nucleotide metabolic process	GO:0006163	0.99183	1	1	AFLA_102850	121	AFLA_102850	1	.	0	http://amigo.geneontology.org/cgi-bin/amigo/term_details?term=GO:0006163	no
aromatic compound biosynthetic process	GO:0019438	0.99201	1	30	AFLA_023420|AFLA_026100|AFLA_036110|AFLA_109820|AFLA_110930|AFLA_060700|AFLA_012050|AFLA_012080|AFLA_125270|AFLA_082850|AFLA_085740|AFLA_086100|AFLA_116430|AFLA_118100|AFLA_122560|AFLA_122570|AFLA_093230|AFLA_093880|AFLA_128330|AFLA_014490|AFLA_015920|AFLA_021310|AFLA_129420|AFLA_064290|AFLA_065850|AFLA_066210|AFLA_071180|AFLA_001850|AFLA_131330|AFLA_050300	1116	AFLA_026100|AFLA_085740|AFLA_086100|AFLA_116430|AFLA_122560|AFLA_122570|AFLA_093230|AFLA_128330|AFLA_014490|AFLA_065850|AFLA_001850|AFLA_131330|AFLA_050300	13	AFLA_023420|AFLA_036110|AFLA_109820|AFLA_110930|AFLA_060700|AFLA_012050|AFLA_012080|AFLA_125270|AFLA_082850|AFLA_118100|AFLA_093880|AFLA_015920|AFLA_021310|AFLA_129420|AFLA_064290|AFLA_066210|AFLA_071180	17	http://amigo.geneontology.org/cgi-bin/amigo/term_details?term=GO:0019438	no
protein localization to organelle	GO:0033365	0.99361	1	2	AFLA_038590|AFLA_047300	180	AFLA_038590	1	AFLA_047300	1	http://amigo.geneontology.org/cgi-bin/amigo/term_details?term=GO:0033365	no
nitrogen compound metabolic process	GO:0006807	0.99396	1	75	AFLA_023420|AFLA_024750|AFLA_026100|AFLA_031380|AFLA_031780|AFLA_033330|AFLA_035340|AFLA_035970|AFLA_036090|AFLA_036110|AFLA_036440|AFLA_109820|AFLA_110930|AFLA_112010|AFLA_057420|AFLA_060530|AFLA_060680|AFLA_060700|AFLA_063160|AFLA_063420|AFLA_054470|AFLA_012050|AFLA_012080|AFLA_073340|AFLA_073450|AFLA_075840|AFLA_079160|AFLA_079230|AFLA_082850|AFLA_084230|AFLA_123350|AFLA_085740|AFLA_086100|AFL…	2410	AFLA_026100|AFLA_031380|AFLA_035970|AFLA_112010|AFLA_057420|AFLA_054470|AFLA_073340|AFLA_085740|AFLA_086100|AFLA_116430|AFLA_122560|AFLA_122570|AFLA_092640|AFLA_093230|AFLA_093470|AFLA_128330|AFLA_014490|AFLA_016930|AFLA_017580|AFLA_047080|AFLA_102850|AFLA_065850|AFLA_067450|AFLA_001850|AFLA_003810|AFLA_131330|AFLA_134090|AFLA_134560|AFLA_050300|AFLA_137200|AFLA_137760	31	AFLA_023420|AFLA_024750|AFLA_031780|AFLA_033330|AFLA_035340|AFLA_036090|AFLA_036110|AFLA_036440|AFLA_109820|AFLA_110930|AFLA_060530|AFLA_060680|AFLA_060700|AFLA_063160|AFLA_063420|AFLA_012050|AFLA_012080|AFLA_073450|AFLA_075840|AFLA_079160|AFLA_079230|AFLA_082850|AFLA_084230|AFLA_123350|AFLA_118220|AFLA_091360|AFLA_093880|AFLA_015920|AFLA_021310|AFLA_021700|AFLA_129420|AFLA_041420|AFLA_041430|AFL…	44	http://amigo.geneontology.org/cgi-bin/amigo/term_details?term=GO:0006807	no
cellular protein complex assembly	GO:0043623	0.99475	1	1	AFLA_005180	132	.	0	AFLA_005180	1	http://amigo.geneontology.org/cgi-bin/amigo/term_details?term=GO:0043623	no
establishment of protein localization	GO:0045184	0.99485	1	9	AFLA_052640|AFLA_056120|AFLA_007610|AFLA_089900|AFLA_095670|AFLA_038590|AFLA_046150|AFLA_069190|AFLA_137060	465	AFLA_052640|AFLA_056120|AFLA_007610|AFLA_038590|AFLA_046150|AFLA_069190|AFLA_137060	7	AFLA_089900|AFLA_095670	2	http://amigo.geneontology.org/cgi-bin/amigo/term_details?term=GO:0045184	no
regulation of biological process	GO:0050789	0.99498	1	39	AFLA_023420|AFLA_026100|AFLA_028740|AFLA_031780|AFLA_034340|AFLA_052640|AFLA_109820|AFLA_056120|AFLA_009750|AFLA_073340|AFLA_075840|AFLA_082850|AFLA_123350|AFLA_085740|AFLA_122560|AFLA_122570|AFLA_093230|AFLA_093880|AFLA_128330|AFLA_014490|AFLA_015920|AFLA_018500|AFLA_038590|AFLA_129420|AFLA_041730|AFLA_047300|AFLA_098430|AFLA_099280|AFLA_101160|AFLA_102850|AFLA_065850|AFLA_068440|AFLA_069190|AFL…	1410	AFLA_026100|AFLA_028740|AFLA_052640|AFLA_056120|AFLA_073340|AFLA_085740|AFLA_122560|AFLA_122570|AFLA_093230|AFLA_128330|AFLA_014490|AFLA_018500|AFLA_038590|AFLA_102850|AFLA_065850|AFLA_068440|AFLA_069190|AFLA_003220|AFLA_131330|AFLA_050300	20	AFLA_023420|AFLA_031780|AFLA_034340|AFLA_109820|AFLA_009750|AFLA_075840|AFLA_082850|AFLA_123350|AFLA_093880|AFLA_015920|AFLA_129420|AFLA_041730|AFLA_047300|AFLA_098430|AFLA_099280|AFLA_101160|AFLA_071180|AFLA_003980|AFLA_131470	19	http://amigo.geneontology.org/cgi-bin/amigo/term_details?term=GO:0050789	no
RNA splicing	GO:0008380	0.99515	1	1	AFLA_130100	134	.	0	AFLA_130100	1	http://amigo.geneontology.org/cgi-bin/amigo/term_details?term=GO:0008380	no
cellular response to stress	GO:0033554	0.99529	1	10	AFLA_030430|AFLA_031780|AFLA_034340|AFLA_056250|AFLA_063160|AFLA_075840|AFLA_075860|AFLA_017580|AFLA_098430|AFLA_068440	504	AFLA_075860|AFLA_017580|AFLA_068440	3	AFLA_030430|AFLA_031780|AFLA_034340|AFLA_056250|AFLA_063160|AFLA_075840|AFLA_098430	7	http://amigo.geneontology.org/cgi-bin/amigo/term_details?term=GO:0033554	no
mRNA processing	GO:0006397	0.99552	1	2	AFLA_093470|AFLA_130100	190	AFLA_093470	1	AFLA_130100	1	http://amigo.geneontology.org/cgi-bin/amigo/term_details?term=GO:0006397	no
mitochondrion organization	GO:0007005	0.99598	1	2	AFLA_071500|AFLA_005180	193	AFLA_071500	1	AFLA_005180	1	http://amigo.geneontology.org/cgi-bin/amigo/term_details?term=GO:0007005	no
organic cyclic compound metabolic process	GO:1901360	0.99599	1	66	AFLA_023420|AFLA_024510|AFLA_024750|AFLA_026100|AFLA_030250|AFLA_031780|AFLA_033330|AFLA_035340|AFLA_036090|AFLA_036110|AFLA_109820|AFLA_110890|AFLA_110930|AFLA_057420|AFLA_058760|AFLA_060700|AFLA_062260|AFLA_063160|AFLA_012050|AFLA_012080|AFLA_073340|AFLA_125090|AFLA_125270|AFLA_079160|AFLA_125680|AFLA_082850|AFLA_085740|AFLA_086100|AFLA_116430|AFLA_118100|AFLA_119710|AFLA_120890|AFLA_122560|AFL…	2191	AFLA_026100|AFLA_030250|AFLA_110890|AFLA_057420|AFLA_062260|AFLA_073340|AFLA_125090|AFLA_085740|AFLA_086100|AFLA_116430|AFLA_119710|AFLA_120890|AFLA_122560|AFLA_122570|AFLA_092640|AFLA_093230|AFLA_093470|AFLA_128330|AFLA_014490|AFLA_016930|AFLA_017580|AFLA_047080|AFLA_102850|AFLA_065570|AFLA_065850|AFLA_001850|AFLA_131330|AFLA_134560|AFLA_050300|AFLA_138560	30	AFLA_023420|AFLA_024510|AFLA_024750|AFLA_031780|AFLA_033330|AFLA_035340|AFLA_036090|AFLA_036110|AFLA_109820|AFLA_110930|AFLA_058760|AFLA_060700|AFLA_063160|AFLA_012050|AFLA_012080|AFLA_125270|AFLA_079160|AFLA_125680|AFLA_082850|AFLA_118100|AFLA_091360|AFLA_093880|AFLA_015920|AFLA_021310|AFLA_129420|AFLA_044170|AFLA_130100|AFLA_047300|AFLA_064290|AFLA_065130|AFLA_065740|AFLA_066210|AFLA_068000|AFL…	36	http://amigo.geneontology.org/cgi-bin/amigo/term_details?term=GO:1901360	no
regulation of cellular process	GO:0050794	0.99615	1	36	AFLA_023420|AFLA_026100|AFLA_028740|AFLA_031780|AFLA_034340|AFLA_052640|AFLA_109820|AFLA_056120|AFLA_009750|AFLA_073340|AFLA_075840|AFLA_082850|AFLA_123350|AFLA_085740|AFLA_122560|AFLA_122570|AFLA_093230|AFLA_093880|AFLA_128330|AFLA_014490|AFLA_015920|AFLA_038590|AFLA_129420|AFLA_041730|AFLA_047300|AFLA_101160|AFLA_102850|AFLA_065850|AFLA_068440|AFLA_069190|AFLA_071180|AFLA_003220|AFLA_003980|AFL…	1337	AFLA_026100|AFLA_028740|AFLA_052640|AFLA_056120|AFLA_073340|AFLA_085740|AFLA_122560|AFLA_122570|AFLA_093230|AFLA_128330|AFLA_014490|AFLA_038590|AFLA_102850|AFLA_065850|AFLA_068440|AFLA_069190|AFLA_003220|AFLA_131330|AFLA_050300	19	AFLA_023420|AFLA_031780|AFLA_034340|AFLA_109820|AFLA_009750|AFLA_075840|AFLA_082850|AFLA_123350|AFLA_093880|AFLA_015920|AFLA_129420|AFLA_041730|AFLA_047300|AFLA_101160|AFLA_071180|AFLA_003980|AFLA_131470	17	http://amigo.geneontology.org/cgi-bin/amigo/term_details?term=GO:0050794	no
phosphorus metabolic process	GO:0006793	0.99633	1	14	AFLA_034340|AFLA_106350|AFLA_110960|AFLA_012050|AFLA_012080|AFLA_077580|AFLA_116430|AFLA_092640|AFLA_047300|AFLA_102850|AFLA_065850|AFLA_001850|AFLA_003220|AFLA_003810	652	AFLA_106350|AFLA_110960|AFLA_077580|AFLA_116430|AFLA_092640|AFLA_102850|AFLA_065850|AFLA_001850|AFLA_003220|AFLA_003810	10	AFLA_034340|AFLA_012050|AFLA_012080|AFLA_047300	4	http://amigo.geneontology.org/cgi-bin/amigo/term_details?term=GO:0006793	no
protein targeting	GO:0006605	0.99634	1	1	AFLA_038590	141	AFLA_038590	1	.	0	http://amigo.geneontology.org/cgi-bin/amigo/term_details?term=GO:0006605	no
cellular component organization	GO:0016043	0.99675	1	34	AFLA_027970|AFLA_031780|AFLA_034340|AFLA_052640|AFLA_111980|AFLA_112090|AFLA_056120|AFLA_011230|AFLA_075840|AFLA_077580|AFLA_078120|AFLA_079160|AFLA_080140|AFLA_123350|AFLA_087880|AFLA_121370|AFLA_089900|AFLA_093230|AFLA_038590|AFLA_041730|AFLA_044170|AFLA_046150|AFLA_047300|AFLA_066700|AFLA_069190|AFLA_070170|AFLA_071500|AFLA_003220|AFLA_003270|AFLA_005180|AFLA_131330|AFLA_131470|AFLA_137060|AFL…	1287	AFLA_027970|AFLA_052640|AFLA_056120|AFLA_011230|AFLA_077580|AFLA_078120|AFLA_087880|AFLA_121370|AFLA_093230|AFLA_038590|AFLA_046150|AFLA_069190|AFLA_071500|AFLA_003220|AFLA_003270|AFLA_131330|AFLA_137060|AFLA_137200	18	AFLA_031780|AFLA_034340|AFLA_111980|AFLA_112090|AFLA_075840|AFLA_079160|AFLA_080140|AFLA_123350|AFLA_089900|AFLA_041730|AFLA_044170|AFLA_047300|AFLA_066700|AFLA_070170|AFLA_005180|AFLA_131470	16	http://amigo.geneontology.org/cgi-bin/amigo/term_details?term=GO:0016043	no
phosphate-containing compound metabolic process	GO:0006796	0.9968	1	13	AFLA_034340|AFLA_110960|AFLA_012050|AFLA_012080|AFLA_077580|AFLA_116430|AFLA_092640|AFLA_047300|AFLA_102850|AFLA_065850|AFLA_001850|AFLA_003220|AFLA_003810	624	AFLA_110960|AFLA_077580|AFLA_116430|AFLA_092640|AFLA_102850|AFLA_065850|AFLA_001850|AFLA_003220|AFLA_003810	9	AFLA_034340|AFLA_012050|AFLA_012080|AFLA_047300	4	http://amigo.geneontology.org/cgi-bin/amigo/term_details?term=GO:0006796	no
protein complex assembly	GO:0006461	0.99739	1	2	AFLA_093230|AFLA_005180	205	AFLA_093230	1	AFLA_005180	1	http://amigo.geneontology.org/cgi-bin/amigo/term_details?term=GO:0006461	no
protein transport	GO:0015031	0.99741	1	8	AFLA_056120|AFLA_007610|AFLA_089900|AFLA_095670|AFLA_038590|AFLA_046150|AFLA_069190|AFLA_137060	455	AFLA_056120|AFLA_007610|AFLA_038590|AFLA_046150|AFLA_069190|AFLA_137060	6	AFLA_089900|AFLA_095670	2	http://amigo.geneontology.org/cgi-bin/amigo/term_details?term=GO:0015031	no
protein localization	GO:0008104	0.99757	1	11	AFLA_052640|AFLA_056120|AFLA_007610|AFLA_089900|AFLA_095670|AFLA_038590|AFLA_046150|AFLA_047300|AFLA_098430|AFLA_069190|AFLA_137060	566	AFLA_052640|AFLA_056120|AFLA_007610|AFLA_038590|AFLA_046150|AFLA_069190|AFLA_137060	7	AFLA_089900|AFLA_095670|AFLA_047300|AFLA_098430	4	http://amigo.geneontology.org/cgi-bin/amigo/term_details?term=GO:0008104	no
protein complex biogenesis	GO:0070271	0.99782	1	2	AFLA_093230|AFLA_005180	210	AFLA_093230	1	AFLA_005180	1	http://amigo.geneontology.org/cgi-bin/amigo/term_details?term=GO:0070271	no
mitotic nuclear division	GO:0007067	0.99792	1	1	AFLA_047300	155	.	0	AFLA_047300	1	http://amigo.geneontology.org/cgi-bin/amigo/term_details?term=GO:0007067	no
heterocycle biosynthetic process	GO:0018130	0.99793	1	30	AFLA_023420|AFLA_024750|AFLA_026100|AFLA_109820|AFLA_110890|AFLA_058760|AFLA_012050|AFLA_012080|AFLA_082850|AFLA_085740|AFLA_086100|AFLA_116430|AFLA_118100|AFLA_122560|AFLA_122570|AFLA_093230|AFLA_093880|AFLA_128330|AFLA_014490|AFLA_015920|AFLA_021310|AFLA_129420|AFLA_065570|AFLA_065850|AFLA_071180|AFLA_001850|AFLA_002920|AFLA_131330|AFLA_050300|AFLA_138050	1190	AFLA_026100|AFLA_110890|AFLA_085740|AFLA_086100|AFLA_116430|AFLA_122560|AFLA_122570|AFLA_093230|AFLA_128330|AFLA_014490|AFLA_065570|AFLA_065850|AFLA_001850|AFLA_131330|AFLA_050300	15	AFLA_023420|AFLA_024750|AFLA_109820|AFLA_058760|AFLA_012050|AFLA_012080|AFLA_082850|AFLA_118100|AFLA_093880|AFLA_015920|AFLA_021310|AFLA_129420|AFLA_071180|AFLA_002920|AFLA_138050	15	http://amigo.geneontology.org/cgi-bin/amigo/term_details?term=GO:0018130	no
regulation of cell cycle	GO:0051726	0.9983	1	1	AFLA_047300	160	.	0	AFLA_047300	1	http://amigo.geneontology.org/cgi-bin/amigo/term_details?term=GO:0051726	no
transcription, DNA-templated	GO:0006351	0.99833	1	17	AFLA_023420|AFLA_026100|AFLA_109820|AFLA_082850|AFLA_085740|AFLA_086100|AFLA_122560|AFLA_122570|AFLA_093880|AFLA_128330|AFLA_014490|AFLA_015920|AFLA_021310|AFLA_129420|AFLA_065850|AFLA_131330|AFLA_050300	787	AFLA_026100|AFLA_085740|AFLA_086100|AFLA_122560|AFLA_122570|AFLA_128330|AFLA_014490|AFLA_065850|AFLA_131330|AFLA_050300	10	AFLA_023420|AFLA_109820|AFLA_082850|AFLA_093880|AFLA_015920|AFLA_021310|AFLA_129420	7	http://amigo.geneontology.org/cgi-bin/amigo/term_details?term=GO:0006351	no
RNA biosynthetic process	GO:0032774	0.99847	1	17	AFLA_023420|AFLA_026100|AFLA_109820|AFLA_082850|AFLA_085740|AFLA_086100|AFLA_122560|AFLA_122570|AFLA_093880|AFLA_128330|AFLA_014490|AFLA_015920|AFLA_021310|AFLA_129420|AFLA_065850|AFLA_131330|AFLA_050300	791	AFLA_026100|AFLA_085740|AFLA_086100|AFLA_122560|AFLA_122570|AFLA_128330|AFLA_014490|AFLA_065850|AFLA_131330|AFLA_050300	10	AFLA_023420|AFLA_109820|AFLA_082850|AFLA_093880|AFLA_015920|AFLA_021310|AFLA_129420	7	http://amigo.geneontology.org/cgi-bin/amigo/term_details?term=GO:0032774	no
mRNA metabolic process	GO:0016071	0.99854	1	2	AFLA_093470|AFLA_130100	221	AFLA_093470	1	AFLA_130100	1	http://amigo.geneontology.org/cgi-bin/amigo/term_details?term=GO:0016071	no
macromolecule localization	GO:0033036	0.99868	1	13	AFLA_034340|AFLA_052640|AFLA_056120|AFLA_007610|AFLA_089900|AFLA_095670|AFLA_038590|AFLA_046150|AFLA_047300|AFLA_098430|AFLA_069190|AFLA_003050|AFLA_137060	661	AFLA_052640|AFLA_056120|AFLA_007610|AFLA_038590|AFLA_046150|AFLA_069190|AFLA_003050|AFLA_137060	8	AFLA_034340|AFLA_089900|AFLA_095670|AFLA_047300|AFLA_098430	5	http://amigo.geneontology.org/cgi-bin/amigo/term_details?term=GO:0033036	no
chromatin organization	GO:0006325	0.99872	1	1	AFLA_047300	167	.	0	AFLA_047300	1	http://amigo.geneontology.org/cgi-bin/amigo/term_details?term=GO:0006325	no
nucleobase-containing compound biosynthetic process	GO:0034654	0.99878	1	22	AFLA_023420|AFLA_026100|AFLA_109820|AFLA_012050|AFLA_012080|AFLA_082850|AFLA_085740|AFLA_086100|AFLA_116430|AFLA_122560|AFLA_122570|AFLA_093230|AFLA_093880|AFLA_128330|AFLA_014490|AFLA_015920|AFLA_021310|AFLA_129420|AFLA_065850|AFLA_001850|AFLA_131330|AFLA_050300	965	AFLA_026100|AFLA_085740|AFLA_086100|AFLA_116430|AFLA_122560|AFLA_122570|AFLA_093230|AFLA_128330|AFLA_014490|AFLA_065850|AFLA_001850|AFLA_131330|AFLA_050300	13	AFLA_023420|AFLA_109820|AFLA_012050|AFLA_012080|AFLA_082850|AFLA_093880|AFLA_015920|AFLA_021310|AFLA_129420	9	http://amigo.geneontology.org/cgi-bin/amigo/term_details?term=GO:0034654	no
cell division	GO:0051301	0.9989	1	4	AFLA_011230|AFLA_123350|AFLA_089900|AFLA_047300	324	AFLA_011230	1	AFLA_123350|AFLA_089900|AFLA_047300	3	http://amigo.geneontology.org/cgi-bin/amigo/term_details?term=GO:0051301	no
DNA metabolic process	GO:0006259	0.99894	1	4	AFLA_031780|AFLA_073340|AFLA_017580|AFLA_047300	325	AFLA_073340|AFLA_017580	2	AFLA_031780|AFLA_047300	2	http://amigo.geneontology.org/cgi-bin/amigo/term_details?term=GO:0006259	no
protein catabolic process	GO:0030163	0.99927	1	1	AFLA_082200	181	.	0	AFLA_082200	1	http://amigo.geneontology.org/cgi-bin/amigo/term_details?term=GO:0030163	no
cellular aromatic compound metabolic process	GO:0006725	0.99934	1	56	AFLA_023420|AFLA_024750|AFLA_026100|AFLA_031780|AFLA_033330|AFLA_035340|AFLA_036090|AFLA_036110|AFLA_108330|AFLA_109820|AFLA_110930|AFLA_057420|AFLA_060700|AFLA_062260|AFLA_012050|AFLA_012080|AFLA_073340|AFLA_125090|AFLA_125270|AFLA_079160|AFLA_082850|AFLA_085740|AFLA_086100|AFLA_116430|AFLA_118100|AFLA_120890|AFLA_121450|AFLA_122560|AFLA_122570|AFLA_091360|AFLA_092640|AFLA_093230|AFLA_093470|AFL…	2018	AFLA_026100|AFLA_108330|AFLA_057420|AFLA_062260|AFLA_073340|AFLA_125090|AFLA_085740|AFLA_086100|AFLA_116430|AFLA_120890|AFLA_121450|AFLA_122560|AFLA_122570|AFLA_092640|AFLA_093230|AFLA_093470|AFLA_128330|AFLA_014490|AFLA_016930|AFLA_017580|AFLA_042910|AFLA_047080|AFLA_102850|AFLA_065850|AFLA_001850|AFLA_131330|AFLA_134560|AFLA_050300	28	AFLA_023420|AFLA_024750|AFLA_031780|AFLA_033330|AFLA_035340|AFLA_036090|AFLA_036110|AFLA_109820|AFLA_110930|AFLA_060700|AFLA_012050|AFLA_012080|AFLA_125270|AFLA_079160|AFLA_082850|AFLA_118100|AFLA_091360|AFLA_093880|AFLA_015920|AFLA_021310|AFLA_129420|AFLA_044170|AFLA_130100|AFLA_047300|AFLA_064290|AFLA_066210|AFLA_068000|AFLA_071180	28	http://amigo.geneontology.org/cgi-bin/amigo/term_details?term=GO:0006725	no
cellular nitrogen compound biosynthetic process	GO:0044271	0.99935	1	26	AFLA_023420|AFLA_024750|AFLA_026100|AFLA_109820|AFLA_063420|AFLA_012050|AFLA_012080|AFLA_079230|AFLA_082850|AFLA_085740|AFLA_086100|AFLA_116430|AFLA_122560|AFLA_122570|AFLA_093230|AFLA_093880|AFLA_128330|AFLA_014490|AFLA_015920|AFLA_021310|AFLA_129420|AFLA_065850|AFLA_001850|AFLA_131330|AFLA_050300|AFLA_138430	1122	AFLA_026100|AFLA_085740|AFLA_086100|AFLA_116430|AFLA_122560|AFLA_122570|AFLA_093230|AFLA_128330|AFLA_014490|AFLA_065850|AFLA_001850|AFLA_131330|AFLA_050300	13	AFLA_023420|AFLA_024750|AFLA_109820|AFLA_063420|AFLA_012050|AFLA_012080|AFLA_079230|AFLA_082850|AFLA_093880|AFLA_015920|AFLA_021310|AFLA_129420|AFLA_138430	13	http://amigo.geneontology.org/cgi-bin/amigo/term_details?term=GO:0044271	no
cellular response to DNA damage stimulus	GO:0006974	0.99935	1	2	AFLA_063160|AFLA_017580	243	AFLA_017580	1	AFLA_063160	1	http://amigo.geneontology.org/cgi-bin/amigo/term_details?term=GO:0006974	no
cellular metabolic process	GO:0044237	0.99938	1	134	AFLA_023420|AFLA_023490|AFLA_024510|AFLA_024750|AFLA_050800|AFLA_026100|AFLA_028740|AFLA_030140|AFLA_030430|AFLA_031780|AFLA_033330|AFLA_034340|AFLA_035340|AFLA_035970|AFLA_036090|AFLA_036110|AFLA_036440|AFLA_106350|AFLA_107840|AFLA_108330|AFLA_108930|AFLA_109820|AFLA_110340|AFLA_110890|AFLA_110930|AFLA_110960|AFLA_111980|AFLA_112010|AFLA_112090|AFLA_054760|AFLA_056250|AFLA_057420|AFLA_057710|AFL…	4086	AFLA_023490|AFLA_026100|AFLA_028740|AFLA_035970|AFLA_106350|AFLA_108330|AFLA_108930|AFLA_110340|AFLA_110890|AFLA_110960|AFLA_112010|AFLA_057420|AFLA_062260|AFLA_073320|AFLA_073340|AFLA_125090|AFLA_075860|AFLA_077580|AFLA_085740|AFLA_086100|AFLA_087870|AFLA_116430|AFLA_119710|AFLA_120890|AFLA_121450|AFLA_122560|AFLA_122570|AFLA_092640|AFLA_093230|AFLA_093470|AFLA_128330|AFLA_014490|AFLA_016930|AFL…	55	AFLA_023420|AFLA_024510|AFLA_024750|AFLA_050800|AFLA_030140|AFLA_030430|AFLA_031780|AFLA_033330|AFLA_034340|AFLA_035340|AFLA_036090|AFLA_036110|AFLA_036440|AFLA_107840|AFLA_109820|AFLA_110930|AFLA_111980|AFLA_112090|AFLA_054760|AFLA_056250|AFLA_057710|AFLA_058760|AFLA_060530|AFLA_060700|AFLA_063040|AFLA_063160|AFLA_063420|AFLA_063680|AFLA_012050|AFLA_012080|AFLA_075030|AFLA_125270|AFLA_075840|AFL…	79	http://amigo.geneontology.org/cgi-bin/amigo/term_details?term=GO:0044237	no
mitotic cell cycle	GO:0000278	0.99952	1	2	AFLA_073340|AFLA_047300	251	AFLA_073340	1	AFLA_047300	1	http://amigo.geneontology.org/cgi-bin/amigo/term_details?term=GO:0000278	no
cell cycle process	GO:0022402	0.99955	1	5	AFLA_073340|AFLA_047300|AFLA_066700|AFLA_003220|AFLA_137060	395	AFLA_073340|AFLA_003220|AFLA_137060	3	AFLA_047300|AFLA_066700	2	http://amigo.geneontology.org/cgi-bin/amigo/term_details?term=GO:0022402	no
macromolecule modification	GO:0043412	0.99965	1	11	AFLA_033330|AFLA_034340|AFLA_110340|AFLA_092640|AFLA_093230|AFLA_045250|AFLA_047300|AFLA_065850|AFLA_067450|AFLA_001850|AFLA_003270	640	AFLA_110340|AFLA_092640|AFLA_093230|AFLA_045250|AFLA_065850|AFLA_067450|AFLA_001850|AFLA_003270	8	AFLA_033330|AFLA_034340|AFLA_047300	3	http://amigo.geneontology.org/cgi-bin/amigo/term_details?term=GO:0043412	no
DNA repair	GO:0006281	0.99969	1	1	AFLA_017580	202	AFLA_017580	1	.	0	http://amigo.geneontology.org/cgi-bin/amigo/term_details?term=GO:0006281	no
proteolysis	GO:0006508	0.9997	1	1	AFLA_137760	203	AFLA_137760	1	.	0	http://amigo.geneontology.org/cgi-bin/amigo/term_details?term=GO:0006508	no
nuclear division	GO:0000280	0.99977	1	1	AFLA_047300	209	.	0	AFLA_047300	1	http://amigo.geneontology.org/cgi-bin/amigo/term_details?term=GO:0000280	no
single-organism organelle organization	GO:1902589	0.99978	1	9	AFLA_031780|AFLA_052640|AFLA_056120|AFLA_089900|AFLA_046150|AFLA_047300|AFLA_069190|AFLA_003270|AFLA_137060	581	AFLA_052640|AFLA_056120|AFLA_046150|AFLA_069190|AFLA_003270|AFLA_137060	6	AFLA_031780|AFLA_089900|AFLA_047300	3	http://amigo.geneontology.org/cgi-bin/amigo/term_details?term=GO:1902589	no
organelle fission	GO:0048285	0.99982	1	1	AFLA_047300	216	.	0	AFLA_047300	1	http://amigo.geneontology.org/cgi-bin/amigo/term_details?term=GO:0048285	no
chromosome organization	GO:0051276	0.99982	1	2	AFLA_031780|AFLA_047300	277	.	0	AFLA_031780|AFLA_047300	2	http://amigo.geneontology.org/cgi-bin/amigo/term_details?term=GO:0051276	no
[truncated: 5,501 more rows]

## Sheet: P02_P_Cellular Component
Description	GO	p	FDR	Significant	Gene_in_de	Annotated	Up_Gene	Up_Count	Down_Gene	Down_Count	Links	Result
[truncated: 1,126 more rows]

## Sheet: P02_P_Molecular Function
Description	GO	p	FDR	Significant	Gene_in_de	Annotated	Up_Gene	Up_Count	Down_Gene	Down_Count	Links	Result
[truncated: 2,848 more rows]

## Sheet: P08_P_Biological Process
Description	GO	p	FDR	Significant	Gene_in_de	Annotated	Up_Gene	Up_Count	Down_Gene	Down_Count	Links	Result
[truncated: 7,215 more rows]

## Sheet: P08_P_Cellular Component
Description	GO	p	FDR	Significant	Gene_in_de	Annotated	Up_Gene	Up_Count	Down_Gene	Down_Count	Links	Result
[truncated: 1,126 more rows]

[truncated: 4 more sheets: P08_P_Molecular Function, P08_P02_Biological Procress, P08_P02_Cellular Component, P08_P02_Molecular Function]
