# Supplementary material for: The Antioxidant Gallic Acid Inhibits Aflatoxin Formation in <em>Aspergillus flavus</em> by Modulating Transcription Factors FarB and CreA
Source: Preprints.org preprint supplement (doi:10.20944/preprints201806.0204.v1), 2018-06-13
Supplement: Supplementary file 1 [file supplementary › Table S7 Primers for creA mutant and qRT-pcr.xlsx]

## Sheet: Sheet1
Name	Sequence (5' to 3')
argB-F	TCCCGGTGGTGATGAGTTCG
argB-R	CCCGTGACATGTGAATGCGG
creA-5F	GCCCCGTTCTTGTCTTGGAC
creA-5R	CCCCTTCTACCGAACTCATCACCACCGGGAGTGACTCGTCCTAACCTAGC
creA-3F	CCGTTGGTGCCCGCATTCACATGTCACGGGTGCGGCTGCGAAACCCTTTC
creA-3R	CGCTTGATAACGACGGGACG
creA-NF	GAGAGGTCCGTTTGACCAGG
creA-NR	CTCTTCGTGCTTACGTCCGC
GPDH-F	ACAAGGAATACAAGACCGACATC
GPDH-R	TCTTCTGGGTAGCAGTGTAGGAG
creA-F	TCACACCCCTGCCCTTGCTC
creA-R	AGGAAACCGACGAAAACCCAG
aflR-F	GCAGTCAATGGAACACGGAAAC
aflR-R	CCTGAAACGGTGGTAGTGGG
aflS-F	ATGCCTCGCAAGTATTAGCCC
aflS-R	CAATGTCTGCCACGTCCTCA
aflA-F	CTATCTGCGGCGTTCGTATC
aflA-R	TCCAAAGGTCCATCTTCACAAT
aflB-F	TGATGGTCTCCGCTCTGAAAT
aflB-R	GTTGTCCCTGACGCTGAATGT
aflC-F	TGTCAGACCACAAACGCACCT
aflC-R	CATCTCACAGAACGCCCTCAA
aflD-F	CGCCTGAGGAGACGGTGTATT
aflD-R	CTGCCTTCAGCGACGGTTAG
aflE-F	ACAGAAGAACACCAAGGCTAC
aflE-R	CGGATTTCCTCCTCGCTCAG
aflF-F	TCCTGGATTTCCGCATACCT
aflF-R	ATTGGCTTCGCTCCCTCTAC
aflG-F	GACTCGTTCGGCTGCCTTGA
aflG-R	GTTCCGGCGTCGCTGTTCTA
aflH-F	CACCCCACTGATTGCGCCTA
aflH-R	ATCGCCTCCCCAACCATACTCG
aflI-F	CGCCATCATATCCGTGCTCCA
aflI-R	CCCTTGCTTCTGTGCTTGACT
aflJ-F	CTGCGTTGCTACACTCCCC
aflJ-R	ATCACGCGGCAGAAACCATC
aflK-F	GTACCACAGAGGCTCGAAAG
aflK-R	TAGGGCAGCCATTTATCCCA
aflL-F	CCGACAAGTTCATCCCCGAG
aflL-R	TGCGCCCAATACAGTTCCG
aflM-F	CCGTTTAGATGGCAAAGTGGC
aflM-R	TCACGGGAATGGGCGTAGTT
aflN-F	ACCTTCCTATGCCAGAGTTCA
aflN-R	AATCATCCAGGTCCCGCTA
aflO-F	TTCGACATCTCGGGACCTTGC
aflO-R	GGGACGCTCCAGAGCCATTAA
aflP-F	CAGAGGATTTACTACGACGG
aflP-R	TGAGAATCCAACCAAGGCAT
aflQ-F	TAAGGCAGCGGAATACAAGCG
aflQ-R	CAAGAGGATGGAAGGACGAGA
