# Supplementary material for: The Antioxidant Gallic Acid Inhibits Aflatoxin Formation in <em>Aspergillus flavus</em> by Modulating Transcription Factors FarB and CreA
Source: Preprints.org preprint supplement (doi:10.20944/preprints201806.0204.v1), 2018-06-13
Supplement: Supplementary file 1 [file Table S3 the transcriptomic profile and the significantly differently expressed genes.xlsx]

## Sheet: The transcriptomic profile
a: the average from each genes triplicate FPKM value. P: untreated A. flavus samples, P02: 0.2% (w/v) gallic acid treated A. flavus samples, P08: 0.8% (w/v) gallic acid treated A. flavus samples.
b: genes expression level in P02 compare with P, ratio: the mean value of the count number of each gene in P02/in P, significant: gene with |log2Ratio|≥1 and q<0.05 was consider as significantly differentially expressed, described as 'yes".
c: genes expression level in P08 compare with P, ratio: the mean value of the count number of each gene in P08/in P, significant: gene with |log2Ratio|≥1 and q<0.05 was consider as significantly differentially expressed, described as 'yes".
	FPKMa			P02_Pb				P08_Pc
Gene ID	P	P02	P08	Log2 ratio	p value	Up/Down	Significant	Log2 ratio	p value	Up/Down	Significant	Description
AFLA_000010	1.51313	1.40602	0.814467	-0.135593	1	down	no	-0.957184	0.362089	down	no	conserved hypothetical protein
AFLA_000020	0.999431	2.30283	1.3319	1.14765	0.297826	up	no	0.365363	0.770253	up	no	penicillin-binding protein, putative
AFLA_000330	3.9773	2.85453	1.23587	-0.634906	0.832354	down	no	-1.8196	0.000119382	down	yes	Ankyrin domain protein
AFLA_000340	14.3415	1.91424	1.03625	-2.99388	6.52e-06	down	yes	-3.86651	5.2e-05	down	yes	short-chain dehydrogenase, putative
AFLA_000350	6.0759	1.54646	0.745785	-2.10717	0.169394	down	no	-3.14273	6.68e-08	down	yes	NAD dependent epimerase/dehydratase, putative
AFLA_000360	1.96827	1.02147	0.525299	-0.976404	0.79063	down	no	-1.9804	0.155559	down	no	hypothetical protein
AFLA_000370	2.80791	1.42477	1.11992	-1.01783	0.548405	down	no	-1.33462	0.0580491	down	no	hypothetical protein
AFLA_000380	2.02909	1.99362	0.8287	0.0253644	1	up	no	-1.28341	0.119403	down	no	oxidoreductase, short-chain dehydrogenase/reductase family, putative
AFLA_000390	0.48602	0.0890184	0.279914	-2.54608	0.260536	down	no	-0.898876	0.568672	down	no	conserved hypothetical protein
AFLA_000500	1.08891	0.323167	0.210966	-1.83072	0.362273	down	no	-2.43321	0.122069	down	no	conserved hypothetical protein
AFLA_000510	3.26363	0.609144	0.0758396	-2.57277	0.340802	down	no	-5.55624	1.47e-05	down	yes	conserved hypothetical protein
AFLA_000520	31.3186	24.5331	13.6193	-0.338871	0.815414	down	no	-1.19302	0.000844207	down	yes	conserved hypothetical protein
AFLA_000530	2.28392	1.64933	1.80943	-0.536542	0.772244	down	no	-0.402133	0.67607	down	no	conserved hypothetical protein
AFLA_000540	6.82199	4.43775	2.99232	-0.612627	0.671114	down	no	-1.17397	0.0602266	down	no	amidase, putative
AFLA_000550	3.19612	2.83075	1.93198	-0.220659	0.937426	down	no	-0.771332	0.205946	down	no	benzoate 4-monooxygenase cytochrome P450, putative
AFLA_000560	0.10077	0.049072	0	-1.04635	1	down	no	#NAME?	0.733901	down	no	conserved hypothetical protein
AFLA_000570	0.139268	0.135804	0	0.107776	1	up	no	#NAME?	0.709707	down	no	conserved hypothetical protein
AFLA_000580	0.18502	0.248701	0	0.0966237	1	up	no	#NAME?	1	down	no	hypothetical protein
AFLA_000590	0.509458	0.776058	0.504213	0.627275	0.863822	up	no	-0.0165563	1	down	no	conserved hypothetical protein
AFLA_000600	1.86652	1.45225	0.927252	-0.417146	0.872604	down	no	-1.08658	0.14302	down	no	amino acid transporter, putative
AFLA_000610	2.85125	1.4125	5.52588	-0.963826	0.720581	down	no	0.960856	0.336138	up	no	hypothetical protein
AFLA_000640	3.91672	1.94031	1.41206	-1.03482	0.271518	down	no	-1.49321	0.00491379	down	yes	polyamine oxidase, putative
AFLA_000650	0.0216106	0.055969	0.0200954	1.35928	0.998145	up	no	-0.0715377	1	down	no	amino acid transporter, putative
AFLA_000660	0.442653	0.102502	0.0443834	-2.13224	0.259267	down	no	-3.31979	0.0161711	down	yes	benzoate 4-monooxygenase cytochrome P450, putative
AFLA_000680	1.04573	0.627703	0.360873	-0.790874	0.815414	down	no	-1.61718	0.494844	down	no	hypothetical protein
AFLA_000690	23.7321	23.1904	23.1289	-0.0819445	1	down	no	-0.113626	0.901015	down	no	alcohol dehydrogenase, putative
AFLA_000700	9.88429	3.98438	3.77817	-1.37262	0.297583	down	no	-1.4687	0.0478707	down	yes	hypothetical protein
AFLA_000710	4.66771	3.14321	2.25763	-0.597866	0.646184	down	no	-1.09113	0.0323554	down	yes	6-hydroxy-D-nicotine oxidase, putative
AFLA_000720	5.69415	5.18901	4.05367	-0.129494	0.984411	down	no	-0.494078	0.490286	down	no	hypothetical protein
AFLA_000730	9.44408	5.5886	6.2695	-0.74581	0.487525	down	no	-0.609812	0.257387	down	no	conserved hypothetical protein
AFLA_000740	4.7145	3.47993	3.27816	-0.453405	0.765405	down	no	-0.543038	0.399211	down	no	conserved hypothetical protein
AFLA_000750	22.9728	31.0087	42.5498	0.371685	0.765397	up	no	0.819861	0.0172994	up	no	phenylacetaldoxime dehydratase family protein, putative
AFLA_000760	5.94396	10.138	14.8089	0.685715	0.558822	up	no	1.24343	0.00280429	up	yes	MFS transporter, putative
AFLA_000770	1.19684	1.2767	2.29151	-0.000350451	1	down	no	0.842439	0.249797	up	no	conserved hypothetical protein
AFLA_000780	50.7395	61.1778	84.229	0.216991	0.883882	up	no	0.650173	0.105124	up	no	conserved hypothetical protein
AFLA_000790	5.68613	5.10574	6.4785	-0.205393	0.924219	down	no	0.142308	0.81745	up	no	conserved hypothetical protein
AFLA_000800	18.7676	19.5448	28.1036	0.0237012	1	up	no	0.541868	0.325374	up	no	hypothetical protein
AFLA_000810	6.90983	6.97464	6.64951	0.00696594	1	up	no	-0.0743852	0.910448	down	no	beta-glucosidase, putative
AFLA_000820	1.35025	1.4445	1.30204	0.0933543	1	up	no	-0.0535513	0.991722	down	no	MFS sugar transporter, putative
AFLA_000830	13.3358	5.48991	4.03161	-1.25386	0.116164	down	no	-1.70913	6.42e-06	down	yes	conserved hypothetical protein
AFLA_000840	0.910375	1.20444	3.75708	0.374716	0.848568	up	no	2.00587	0.00197219	up	yes	efflux pump antibiotic resistance protein, putative
AFLA_000850	0.931534	0.609762	0.264642	-0.642208	0.734836	down	no	-1.82265	0.0396976	down	yes	conserved hypothetical protein
AFLA_000860	104.843	178.385	128.743	0.7487	0.346235	up	no	0.255314	0.575423	up	no	tripeptidyl peptidase A
AFLA_000870	1007.26	272.318	365.559	-2.04005	0.320023	down	no	-1.53672	4.86e-13	down	yes	hypothetical protein
AFLA_000880	2.90757	1.30189	0.920984	-1.29397	0.779429	down	no	-1.71063	0.132811	down	no	hypothetical protein
AFLA_000890	1.76897	1.1164	0.758666	-0.746332	0.758837	down	no	-1.27098	0.178059	down	no	laccase TilA
AFLA_000900	0	0	0.0625569					Inf	0.71005	up	no	polyamine transporter, putative
AFLA_000910	0.595394	0.411592	0.269316	-0.471504	0.877038	down	no	-1.08561	0.285995	down	no	feruloyl esterase B precursor, putative
AFLA_000920	6.50673	5.92043	7.53638	-0.113425	1	down	no	0.211893	0.810994	up	no	conserved hypothetical protein
AFLA_000930	17.7849	16.4878	12.8955	-0.162977	1	down	no	-0.562493	0.661948	down	no	acetolactate synthase, large subunit, putative
AFLA_000940	0.775454	0.994125	1.28241	0.368168	0.91543	up	no	0.717702	0.451391	up	no	acetylornithine deacetylase, putative
AFLA_000950	0.177755	0.19787	0.297915	0.112404	1	up	no	0.68444	0.894	up	no	conserved hypothetical protein
AFLA_000960	0.228753	0.296991	0.166378	0.338543	1	up	no	-0.483725	0.959432	down	no	allantoate permease, putative
AFLA_000970	0.0850334	0	0.107446	#NAME?	0.587215	down	no	0.356015	0.995095	up	no	allantoate permease, putative
AFLA_000990	0.412575	0.172302	0.245204	-1.31279	0.852673	down	no	-0.890568	0.695707	down	no	conserved hypothetical protein
AFLA_001000	14.7541	7.77404	25.5972	-0.896193	0.34644	down	no	0.798962	0.0234124	up	no	conserved hypothetical protein
AFLA_001010	327.699	1056.67	1103.77	1.67421	0.0137335	up	yes	1.70783	4.84e-09	up	yes	benzoate 4-monooxygenase cytochrome P450, putative
AFLA_001020	0.766375	0.822084	0.635962	0.0303579	1	up	no	-0.353325	0.859821	down	no	cytochrome P450 monooxygenase, putative
AFLA_001030	0.015244	0.0626139	0.017467	2.14716	0.774871	up	no	0.259199	1	up	no	lanosterol synthase, putative
AFLA_001040	1.90309	0.859596	0.880993	-1.19316	0.380743	down	no	-1.19164	0.0886733	down	no	mitochondrial protein Fmp29, putative
AFLA_001050	0.0479853	0.129304	0.382691	1.23601	0.848568	up	no	2.89972	0.0548289	up	no	MFS transporter Seo1, putative
AFLA_001060	0.244671	1.46869	1.47129	2.67908	0.163523	up	no	2.66135	0.0518322	up	no	conserved hypothetical protein
AFLA_001070	1.86401	1.18216	1.43114	-0.646068	0.622554	down	no	-0.374051	0.605527	down	no	ABC transporter, putative
AFLA_001080	0.488627	0.091224	0.0539605	-2.47499	0.268574	down	no	-3.16064	0.000154541	down	yes	glycosyltransferase, putative
AFLA_001090	8.83474	1.95342	1.48167	-2.20952	0.0945572	down	no	-2.56542	1.88e-07	down	yes	conserved hypothetical protein
AFLA_001100	0.0824735	0.0844043	0.0430577	-0.00589294	1	down	no	-1.05234	0.894046	down	no	conserved hypothetical protein
AFLA_001110	29.532	23.3571	19.8862	-0.419109	0.798435	down	no	-0.667014	0.0406386	down	no	conserved hypothetical protein
AFLA_001120	0.53907	1.01592	0.881418	0.896174	0.783574	up	no	0.715801	0.706063	up	no	conserved hypothetical protein
AFLA_001130	0.452557	1.33352	0.108555	1.64394	0.652975	up	no	-2.04298	0.663461	down	no	hypothetical protein
AFLA_001140	8.21511	4.5699	5.2709	-0.867257	0.393799	down	no	-0.694745	0.439393	down	no	conserved hypothetical protein
AFLA_001150	5.61972	3.24765	4.18369	-0.808151	0.453882	down	no	-0.462911	0.61914	down	no	ankyrin repeat-containing protein, putative
AFLA_001160	0.147067	0.0729789	0.0778201	-1.17171	1	down	no	-1.12431	0.966346	down	no	hypothetical protein
AFLA_001170	0.142722	0.477361	0.151749	1.80205	0.900367	up	no	0.187041	1	up	no	hypothetical protein
AFLA_001180	30.0564	30.1049	31.0815	-0.0196567	1	down	no	0.0145527	1	up	no	pheromone-regulated membrane protein, putative
AFLA_001190	13.7739	9.75418	9.5899	-0.528194	0.618942	down	no	-0.552376	0.189854	down	no	MFS transporter, putative
AFLA_001200	10.3134	9.35875	7.87451	-0.158431	0.945172	down	no	-0.401378	0.468574	down	no	conserved hypothetical protein
AFLA_001210	1.97454	1.78934	1.28028	-0.148119	0.972437	down	no	-0.636241	0.476986	down	no	hypothetical protein
AFLA_001220	19.1951	19.2031	15.577	-0.0209632	1	down	no	-0.353736	0.539035	down	no	isochorismatase family hydrolase, putative
AFLA_001230	2.71209	2.74383	1.49786	-0.0655748	1	down	no	-0.912023	0.13174	down	no	gloeobacteria sulfatase, putative
AFLA_001240	8.5323	7.5611	7.42517	-0.283213	0.899865	down	no	-0.294926	0.509003	down	no	beta-glucosidase precursor, putative
AFLA_001250	0.362318	0.159189	0.159478	-1.19624	0.724195	down	no	-1.27138	0.416966	down	no	hexose carrier protein, putative
AFLA_001260	0.600564	0.392755	0.246897	-0.716193	0.868342	down	no	-1.35887	0.307351	down	no	polyamine transporter, putative
AFLA_001270	9.35447	5.42252	2.01739	-0.908718	0.698926	down	no	-2.27858	0.000216195	down	yes	hypothetical protein
AFLA_001280	12.8117	12.5158	16.2185	-0.124407	1	down	no	0.276868	0.596038	up	no	isoflavone reductase family protein CipA, putative
AFLA_001290	435.556	345.385	394.827	-0.397627	0.737496	down	no	-0.201985	0.546127	down	no	oligopeptide transporter, putative
AFLA_001300	387.501	287.078	380.316	-0.503863	0.633424	down	no	-0.0942695	0.841658	down	no	oligopeptide transporter, putative
AFLA_001310	0.795291	0.55804	0.214564	-0.534098	0.878931	down	no	-1.92393	0.311759	down	no	hypothetical protein
AFLA_001320	1.06663	0.378946	2.01103	-1.64281	0.660551	down	no	0.825005	0.411189	up	no	2-oxo-hepta-3-ene-1,7-dioic acid hydratase, putative
AFLA_001330	5.0868	3.89603	5.60655	-0.417886	0.792026	down	no	0.12268	0.94344	up	no	hypothetical protein
AFLA_001340	2.80958	3.84965	3.16959	0.418635	0.792184	up	no	0.129893	0.930187	up	no	conserved hypothetical protein
AFLA_001350	2.24266	2.1388	3.6025	-0.104897	1	down	no	0.66095	0.280497	up	no	oxidoreductase, FAD-binding, putative
AFLA_001360	7.26671	5.10262	6.64387	-0.529907	0.739296	down	no	-0.165416	0.853353	down	no	glutathione S-transferase, putative
AFLA_001370	0	0.0720551	0.408045	Inf	1	up	no	Inf	0.222379	up	no	conserved hypothetical protein
AFLA_001380	0.102173	0.0954735	0.0790882	-0.098835	1	down	no	-0.29778	0.972647	down	no	conserved hypothetical protein
AFLA_001390	0.329277	0.26448	0.182626	-0.310494	1	down	no	-0.904213	0.737138	down	no	conserved hypothetical protein
AFLA_001400	5.99404	3.39603	3.00359	-0.801199	0.548062	down	no	-0.988039	0.151472	down	no	conserved hypothetical protein
AFLA_001410	0.425579	0.889605	0.300964	0.908668	0.67496	up	no	-0.591265	0.808967	down	no	pectin methylesterase, putative
AFLA_001420	0.226288	0.758171	0.35671	1.54412	0.537518	up	no	0.52136	0.84549	up	no	extracellular exo-polygalacturonase, putative
AFLA_001430	4.98281	11.0716	5.63918	1.04481	0.278966	up	no	0.124878	0.917747	up	no	conserved hypothetical protein
AFLA_001440	12.1655	19.4046	12.377	0.564042	0.590299	up	no	-0.036707	0.966402	down	no	feruloyl esterase B precursor, putative
AFLA_001450	13.2866	22.3991	22.7134	0.632431	0.720581	up	no	0.687593	0.113499	up	no	conserved hypothetical protein
AFLA_001460	49.5204	75.6039	86.2189	0.528165	0.672422	up	no	0.718593	0.0642859	up	no	deoxyribodipyrimidine photo-lyase Phr1, putative
AFLA_001470	27.9044	44.2154	73.7373	0.641241	0.462766	up	no	1.34371	0.000178736	up	yes	conserved hypothetical protein
AFLA_001480	2.8421	2.25947	4.05862	-0.311316	0.884372	down	no	0.538378	0.560922	up	no	hypothetical protein
AFLA_001490	0.0824213	0.0418293	0.0853546	-0.860154	1	down	no	0.101106	1	up	no	conserved hypothetical protein
AFLA_001500	3.22748	1.39663	1.9066	-1.17408	0.429342	down	no	-0.731347	0.421344	down	no	integral membrane protein
AFLA_001510	9.85114	4.63326	14.7529	-1.11208	0.128787	down	no	0.566261	0.213873	up	no	glutamyl-tRNA(gln) amidotransferase subunit A, putative
AFLA_001520	21.0832	8.38936	9.01111	-1.36151	0.0517872	down	no	-1.27086	0.000237265	down	yes	conserved hypothetical protein
AFLA_001530	12.9977	6.3559	5.80304	-1.02494	0.182727	down	no	-1.17418	0.00434194	down	yes	MFS monocarboxylate transporter, putative
AFLA_001540	0.629955	0.303128	0.133454	-1.12671	0.650646	down	no	-2.26587	0.0653809	down	no	conserved hypothetical protein
AFLA_001550	0.568768	0.49997	0.560728	-0.195986	0.937985	down	no	-0.0128415	1	down	no	ATP-binding cassette transporter, putative
AFLA_001560	1.68949	1.93553	2.15447	0.162255	0.9879	up	no	0.296165	0.774783	up	no	short-chain dehydrogenase, putative
AFLA_001570	2.36531	1.94057	1.96913	-0.313823	0.876627	down	no	-0.294161	0.711701	down	no	conserved hypothetical protein
AFLA_001580	1.21989	0.0838354	0.167599	-3.81951	0.0233571	down	yes	-2.88592	0.00826685	down	yes	conserved hypothetical protein
AFLA_001590	0.0832924	0	0.0523526	#NAME?	0.728127	down	no	-0.643878	1	down	no	salicylate hydroxylase, putative
AFLA_001600	1.26241	2.50273	0.726354	0.898595	0.619432	up	no	-0.918191	0.430392	down	no	D-amino acid oxidase, putative
AFLA_001610	12.1829	7.48183	10.6152	-0.741394	0.652975	down	no	-0.256615	0.786558	down	no	hypothetical protein
AFLA_001620	8.57302	8.49019	7.57208	-0.0712776	1	down	no	-0.238407	0.781748	down	no	luciferase, putative
AFLA_001630	3.01225	2.9509	2.46124	-0.0521833	1	down	no	-0.31912	0.676608	down	no	conserved hypothetical protein
AFLA_001640	5.47049	6.88293	5.11519	0.317202	0.878931	up	no	-0.101924	0.905114	down	no	glycosyl hydrolase, putative
AFLA_001650	3.52675	1.69258	1.41485	-1.04148	0.280787	down	no	-1.3213	0.0133394	down	yes	efflux pump antibiotic resistance protein, putative
AFLA_001660	194.371	58.8041	90.5582	-1.69159	0.00289426	down	yes	-1.09865	0.000165752	down	yes	conserved hypothetical protein
AFLA_001670	64.5123	46.0824	50.9347	-0.558794	0.861574	down	no	-0.463142	0.311645	down	no	3-demethylubiquinone-9 3-methyltransferase, putative
AFLA_001680	4.70616	3.31155	2.37501	-0.535994	0.75524	down	no	-1.03664	0.102867	down	no	conserved hypothetical protein
AFLA_001690	54.203	12.5689	29.2425	-2.07437	0.0011718	down	yes	-0.849006	0.00360583	down	no	conserved hypothetical protein
AFLA_001700	3.26847	1.65877	2.87851	-0.906669	0.698926	down	no	-0.137946	0.936869	down	no	conserved hypothetical protein
AFLA_001710	67.0093	38.3151	45.6381	-0.801246	0.405856	down	no	-0.57338	0.788771	down	no	aldo-keto reductase, putative
AFLA_001720	3.2447	1.00959	2.17772	-1.78043	0.537514	down	no	-0.690251	0.734047	down	no	hypothetical protein
AFLA_001730	22.0428	31.94	39.6978	0.494839	0.567557	up	no	0.791157	0.0164515	up	no	conserved hypothetical protein
AFLA_001740	26.7101	7.03583	5.72038	-1.92906	0.0803097	down	no	-2.1964	8.28e-14	down	yes	arginine permease, putative
AFLA_001750	32.4501	31.7364	19.9708	-0.000708598	1	down	no	-0.668603	0.0800054	down	no	cell surface protein Mas1, putative
AFLA_001760	0.10265	0	0	#NAME?	1	down	no	#NAME?	1	down	no	conserved hypothetical protein
AFLA_001770	3.44985	1.43693	2.99356	-1.21537	0.20042	down	no	-0.185982	0.781604	down	no	conserved hypothetical protein
AFLA_001780	0.0387541	0	0.119013	#NAME?	1	down	no	1.34452	0.83219	up	no	tyrosinase family protein
AFLA_001790	0.458838	0.647595	0.54255	0.422584	0.863822	up	no	0.153869	0.944594	up	no	polyamine transporter, putative
AFLA_001800	0.933157	1.39392	1.35133	0.541245	0.765405	up	no	0.485936	0.633733	up	no	hypothetical protein
AFLA_001810	4.27311	6.27463	4.11612	0.489079	0.723179	up	no	-0.139298	0.924281	down	no	conserved hypothetical protein
AFLA_001820	73.1652	55.7813	35.7226	-0.507098	0.766986	down	no	-1.16714	0.010711	down	yes	hypothetical protein
AFLA_001830	10.0612	16.8228	19.7157	0.694169	0.445308	up	no	0.889514	0.0987195	up	no	conserved hypothetical protein
AFLA_001840	1.08513	2.42536	1.40262	1.27399	0.652703	up	no	0.437811	0.922297	up	no	conserved hypothetical protein
AFLA_001850	10.777	29.3666	8.83307	1.45414	0.0286243	up	yes	-0.321535	0.684555	down	no	conserved hypothetical protein
AFLA_001870	0.469486	0.111928	0.0215001	-2.08587	0.487176	down	no	-4.44938	0.0111139	down	yes	MFS transporter, putative
AFLA_001880	1.23288	0.406301	0.12535	-1.59086	0.319481	down	no	-3.31123	0.13229	down	no	conserved hypothetical protein
AFLA_001890	18.5634	16.414	5.86866	-0.172145	0.899877	down	no	-1.65683	2.43e-09	down	yes	cellobiose dehydrogenase
AFLA_001900	135.322	118.967	78.5792	-0.173718	0.938817	down	no	-0.794069	0.000580006	down	no	sulfatase domain protein
AFLA_001910	148.968	110.666	84.1126	-0.416099	0.691905	down	no	-0.830309	0.00480398	down	no	hypothetical protein
AFLA_001920	4.71114	4.85422	2.91046	0.0412464	1	up	no	-0.707012	0.170209	down	no	flavin-binding monooxygenase, putative
AFLA_001930	6.24868	5.69225	6.42158	-0.144871	0.974447	down	no	0.0167425	1	up	no	luciferase, putative
AFLA_001940	28.7038	74.2985	58.4683	1.4024	0.08144	up	no	1.04934	0.0803358	up	no	amino acid transporter, putative
AFLA_001950	12.6903	5.63186	3.09165	-1.23535	0.187653	down	no	-2.1201	3.82e-06	down	yes	gluconate 5-dehydrogenase, putative
AFLA_001960	92.6404	152.206	145.193	0.686463	0.3738	up	no	0.585451	0.0409143	up	no	aldehyde dehydrogenase, putative
AFLA_001970	0.255011	0.0419007	0	-2.66878	0.447813	down	no	#NAME?	0.0772995	down	no	2-amino-3-carboxymuconate-6-semialdehyde decarboxylase, putative
AFLA_001990	0.169169	0.0780195	0.042436	-1.26018	0.795879	down	no	-2.09161	0.380862	down	no	conserved hypothetical protein
AFLA_002000	18.7874	32.1235	46.5808	0.706926	0.556044	up	no	1.2388	0.0292812	up	yes	DUF821 domain protein
AFLA_002010	7.68065	12.9076	6.9202	0.674461	0.570728	up	no	-0.21737	0.880445	down	no	conserved hypothetical protein
AFLA_002020	0.0730583	0.517436	0.0408837	2.65898	0.289082	up	no	-0.922035	1	down	no	spherulin 4-like cell surface protein, putative
AFLA_002030	1.8088	1.22721	0.412995	-0.678068	0.770107	down	no	-2.22101	0.00301593	down	yes	MFS monocarboxylate transporter, putative
AFLA_002040	0.268857	0.361394	0	0.0966237	1	up	no	#NAME?	0.460145	down	no	conserved hypothetical protein
AFLA_002060	1.968	3.06608	4.12848	0.572254	0.662077	up	no	0.977217	0.112483	up	no	zinc-binding oxidoreductase, putative
AFLA_002070	0	0	0.0317266					Inf	1	up	no	conserved hypothetical protein
AFLA_002080	4.57932	3.15896	4.05828	-0.552606	0.728127	down	no	-0.206062	0.835506	down	no	hypothetical protein
AFLA_002090	7.02974	6.15772	15.3582	-0.230066	0.934113	down	no	1.06081	0.058559	up	no	extracellular serine carboxypeptidase, putative
AFLA_002100	0.106353	0.0216411	0.0221937	-2.30269	0.739296	down	no	-2.28165	0.510149	down	no	AMP dependent ligase/synthetase, putative
AFLA_002110	0.0347612	0	0.0335533	#NAME?	1	down	no	-0.344688	1	down	no	short chain dehydrogenase, putative
AFLA_002120	0.0726064	0	0	#NAME?	0.863822	down	no	#NAME?	0.709707	down	no	conserved hypothetical protein
AFLA_002130	0.0810686	0	0	#NAME?	0.846994	down	no	#NAME?	0.677803	down	no	short-chain dehydrogenase, putative
AFLA_002140	0.0979117	0.152612	0.304363	0.666739	0.952498	up	no	1.62537	0.328166	up	no	acetyltransferase, putative
AFLA_002150	0.166697	0.166527	0.0686317	-0.0879311	1	down	no	-1.48947	0.875595	down	no	dimethylaniline monooxygenase, putative
AFLA_002160	1.36447	1.0946	0.660768	-0.355691	0.945623	down	no	-1.12692	0.171247	down	no	extracellular salicylate hydroxylase/monooxygenase, putative
AFLA_002170	0.13001	0.169712	0.141349	0.524698	1	up	no	0.209963	1	up	no	conserved hypothetical protein
AFLA_002180	5.77542	5.70749	7.90856	-0.0158055	1	down	no	0.415502	0.4752	up	no	conserved hypothetical protein
AFLA_002190	4.40719	2.41736	1.58664	-0.838084	0.422208	down	no	-1.44972	0.0726322	down	no	MFS transporter, putative
AFLA_002200	60.3767	26.0818	6.48929	-1.20415	0.068803	down	no	-3.24116	7.1e-06	down	yes	esterase, putative
AFLA_002210	10.6476	4.34263	2.91878	-1.2889	0.223995	down	no	-1.88754	0.0114642	down	yes	hypothetical protein
AFLA_002220	2.69255	1.79198	3.27414	-0.579024	0.695979	down	no	0.249923	0.781748	up	no	proline permease, putative
AFLA_002230	17.6032	3.15889	3.66837	-2.5321	0.00351155	down	yes	-2.36842	8.06e-06	down	yes	conserved hypothetical protein
AFLA_002240	1.35851	0.309483	1.13973	-2.14229	0.662294	down	no	-0.330424	0.948916	down	no	hypothetical protein
AFLA_002250	1.23325	0.702525	0.581256	-0.923958	0.912176	down	no	-1.1408	0.555997	down	no	hypothetical protein
AFLA_002260	0	0.0807426	0.0927857	Inf	1	up	no	Inf	1	up	no	conserved hypothetical protein
AFLA_002270	0.134881	0.147571	0	0.122707	1	up	no	#NAME?	0.354868	down	no	GPI anchored protein, putative
AFLA_002280	30.0836	26.9527	29.4696	-0.148789	0.985465	down	no	-0.0524764	1	down	no	hypothetical protein
AFLA_002290	42.8126	50.6693	45.1866	0.245986	0.863822	up	no	0.0485431	0.916757	up	no	C2H2 transcription factor (AmdX), putative
AFLA_002300	49.9127	21.5786	13.108	-1.24209	0.435427	down	no	-1.91031	9.25e-17	down	yes	conserved hypothetical protein
AFLA_002310	7.83425	8.83479	8.18288	0.168854	0.979566	up	no	0.0670999	1	up	no	conserved hypothetical protein
AFLA_002320	34.1629	43.576	44.75	0.322735	0.781713	up	no	0.347229	0.317806	up	no	sorting nexin Mvp1
AFLA_002330	34.6337	50.4685	37.2295	0.535771	0.573488	up	no	0.0872644	0.904779	up	no	Na+/H+ antiporter Nha1
AFLA_002340	50.0219	48.2962	34.0233	-0.0566697	1	down	no	-0.563223	0.0574239	down	no	protein kinase regulator Ste50
AFLA_002350	3.44441	3.49174	3.17337	0.039145	1	up	no	-0.140049	1	down	no	hypothetical protein
AFLA_002360	29.2313	35.2447	23.9467	0.253022	0.848568	up	no	-0.329462	0.46731	down	no	conserved hypothetical protein
AFLA_002370	274.239	275.112	226.71	-0.0600676	1	down	no	-0.345621	0.220752	down	no	cell division control protein Cdc48
AFLA_002380	4.61337	3.30001	2.04382	-0.518884	0.760085	down	no	-1.20634	0.0757184	down	no	conserved hypothetical protein
AFLA_002390	79.6628	67.1938	57.7299	-0.257569	0.835595	down	no	-0.475035	0.108523	down	no	conserved hypothetical protein
AFLA_002400	2.42543	2.21612	3.2447	-0.143445	0.967402	down	no	0.429872	0.63343	up	no	conserved hypothetical protein
AFLA_002410	166.232	166.086	140.238	0.0236981	1	up	no	-0.232837	0.451209	down	no	integral membrane protein 25D9-6
AFLA_002420	86.0552	69.3744	99.6986	-0.334362	0.820698	down	no	0.16782	0.671776	up	no	DUF298 domain protein
AFLA_002430	4.06416	4.41314	6.49222	0.109676	1	up	no	0.671589	0.1281	up	no	conserved hypothetical protein
AFLA_002440	90.3905	33.7175	26.2427	-1.5	0.140425	down	no	-1.83559	1.73e-09	down	yes	hypothetical protein
AFLA_002450	63.5465	103.475	89.3752	0.652072	0.435022	up	no	0.424278	0.368625	up	no	conserved hypothetical protein
AFLA_002460	0	2.0373	0.747253	Inf	0.177347	up	no	Inf	0.494688	up	no	hypothetical protein
AFLA_002470	102.352	92.877	83.9232	-0.125699	0.965954	down	no	-0.291219	0.343526	down	no	50S ribosomal subunit L30
AFLA_002480	6.06297	7.54924	7.59519	0.291497	0.890833	up	no	0.30752	0.653696	up	no	hypothetical protein
AFLA_002490	16.7501	23.3019	16.549	0.494095	0.646184	up	no	-0.0155266	0.981486	down	no	conserved hypothetical protein
AFLA_002500	65.1777	52.232	17.6486	-0.291117	0.880167	down	no	-1.89786	2.31e-13	down	yes	succinate:fumarate antiporter (Acr1), putative
AFLA_002510	64.491	100.013	139.507	0.612979	0.413927	up	no	1.06458	0.000159337	up	yes	actin monomer binding protein, putative
AFLA_002520	106.052	93.6381	95.5081	-0.217086	0.884036	down	no	-0.183179	0.650684	down	no	conserved hypothetical protein
AFLA_002530	26.947	23.3699	23.3987	-0.215377	0.919258	down	no	-0.230215	0.594519	down	no	nuclear protein SDK3, putative
AFLA_002540	15.0439	20.3	18.3845	0.433663	0.672659	up	no	0.261815	0.621919	up	no	epoxide hydrolase, putative
AFLA_002550	11.2922	9.47848	10.5753	-0.261179	0.882327	down	no	-0.120756	0.858651	down	no	conserved hypothetical protein
AFLA_002560	2573.76	901.635	1620.8	-1.49698	0.017667	down	yes	-0.666038	0.00402482	down	no	60S ribosomal protein L37a
AFLA_002570	44.3418	46.3909	53.523	0.0619144	1	up	no	0.254978	0.484695	up	no	PHD and RING finger domain protein, putative
AFLA_002580	5.68754	8.68878	6.32355	0.550507	0.808578	up	no	0.134614	0.971112	up	no	hypothetical protein
AFLA_002590	65.7188	43.45	49.0689	-0.634264	0.67286	down	no	-0.448639	0.692317	down	no	MFS multidrug transporter, putative
AFLA_002600	11.5592	14.1721	12.0576	0.278544	0.874292	up	no	0.052036	0.995491	up	no	sister chromatid cohesion and DNA repair protein (BimD), putative
AFLA_002610	49.1765	43.0474	35.7197	-0.233955	0.883882	down	no	-0.50882	0.0615929	down	no	SWI-SNF complex subunit (Snf5), putative
AFLA_002620	2.35431	1.70707	1.67981	-0.534914	0.78807	down	no	-0.560188	0.557977	down	no	endonuclease/exonuclease/phosphatase family protein
AFLA_002630	2.75916	2.64509	2.96814	-0.0787387	1	down	no	0.0550974	1	up	no	conserved hypothetical protein
AFLA_002640	2.40143	1.55196	1.81577	-0.697287	0.705229	down	no	-0.441512	0.704853	down	no	exo-polygalacturonase, putative
AFLA_002650	2.41664	2.22386	1.11202	-0.191766	1	down	no	-1.16185	0.392561	down	no	hypothetical protein
AFLA_002660	1.82639	1.59302	1.04813	-0.295054	1	down	no	-0.831929	0.362749	down	no	conserved hypothetical protein
AFLA_002670	287.431	172.948	206.187	-0.758411	0.331544	down	no	-0.499075	0.0453398	down	no	curved DNA-binding protein (42 kDa protein)
AFLA_002680	19.4542	25.6212	22.2193	0.374538	0.731325	up	no	0.155859	0.75069	up	no	PHD finger domain protein, putative
AFLA_002690	16.6049	23.3938	37.1863	0.53245	0.661108	up	no	1.17789	0.00143896	up	yes	lectin family integral membrane protein, putative
AFLA_002700	13.1357	13.0983	14.2846	0.0180617	1	up	no	0.136805	0.922297	up	no	glucosyltransferase
AFLA_002710	12.5742	13.5954	14.3499	0.104092	1	up	no	0.183879	0.760854	up	no	DDT domain protein
AFLA_002720	66.8528	102.04	79.7524	0.559444	0.507254	up	no	0.185622	0.67625	up	no	mitochondrial carrier protein (Leu5), putative
AFLA_002730	53.4064	22.4806	27.8876	-1.25924	0.191171	down	no	-0.92173	0.00129097	down	no	pre-rRNA-processing protein esf2
AFLA_002740	35.5488	40.6485	43.4457	0.169244	0.917038	up	no	0.247811	0.523677	up	no	conserved hypothetical protein
AFLA_002750	18.8434	21.7001	17.3893	0.220568	0.918218	up	no	-0.109761	0.80918	down	no	peroxisome biosynthesis protein (PAS10/Peroxin-12), putative
AFLA_002760	5.04654	5.44321	4.78171	0.065394	1	up	no	-0.136256	0.922297	down	no	DUF1237 domain protein
AFLA_002770	17.8024	21.2019	24.6151	0.274728	0.868824	up	no	0.472917	0.281535	up	no	conserved hypothetical protein
AFLA_002780	14.5983	22.6854	17.2433	0.648086	0.496529	up	no	0.248059	0.737984	up	no	DNA repair protein (RadR), putative
AFLA_002790	27.7776	34.8374	35.1973	0.304942	0.847178	up	no	0.317562	0.524945	up	no	vacuolar sorting protein SNF7 family protein, putative
AFLA_002800	15.6808	19.8639	20.4328	0.345008	0.801505	up	no	0.376147	0.373437	up	no	conserved hypothetical protein
AFLA_002810	10.9216	8.8936	13.84	-0.308951	0.825782	down	no	0.323465	0.49161	up	no	tRNA nucleotidyltransferase
AFLA_002820	8.17677	13.378	8.75023	0.681896	0.429342	up	no	0.0505486	1	up	no	Protein phosphatase 2C, putative
AFLA_002830	6.26069	16.6617	8.61368	1.36092	0.101204	up	no	0.395312	0.644178	up	no	alpha,alpha-trehalose-phosphate synthase subunit, putative
AFLA_002840	2.63084	3.04954	2.1156	0.140035	1	up	no	-0.385213	0.753107	down	no	HHE domain protein
AFLA_002850	91.8882	70.1219	40.9956	-0.520934	0.810659	down	no	-1.27042	0.0388793	down	yes	calcium binding protein Caleosin, putative
AFLA_002860	12.6888	14.2422	7.63904	0.0528212	1	up	no	-0.795183	0.0647663	down	no	NAD binding Rossmann fold oxidoreductase, putative
AFLA_002870	8.88359	6.59977	6.11328	-0.461622	0.672659	down	no	-0.555117	0.196431	down	no	conserved hypothetical protein
AFLA_002880	10.3894	10.3034	10.3368	-0.0396954	1	down	no	-0.0384994	0.995375	down	no	polyphosphoinositide phosphatase Fig4
AFLA_002890	11.6578	7.51874	9.75039	-0.685545	0.485601	down	no	-0.315728	0.533633	down	no	AMP-binding enzyme family protein
AFLA_002900	14.2216	20.7165	25.8152	0.464437	0.737778	up	no	0.77205	0.0141399	up	no	polyketide synthase, putative
AFLA_002910	30.7497	63.8975	80.3706	1.02656	0.190841	up	no	1.31503	0.00013399	up	yes	conserved hypothetical protein
AFLA_002920	7.13054	2.38217	3.30528	-1.67013	0.0401255	down	yes	-1.19474	0.0102238	down	yes	flavonoid 3-hydroxylase, putative
AFLA_002930	2.10583	2.1285	1.55806	-0.0584189	1	down	no	-0.48223	0.689333	down	no	hypothetical protein
AFLA_002940	9.75608	12.1278	16.4274	0.335147	0.79788	up	no	0.740713	0.0741527	up	no	glycosyl hydrolase, putative
AFLA_002950	1.93202	1.39333	0.959776	-0.53105	0.920673	down	no	-1.02026	0.528336	down	no	hypothetical protein
AFLA_002960	4.66409	4.02852	3.32575	-0.237583	0.987341	down	no	-0.534026	0.631919	down	no	conserved hypothetical protein
AFLA_002970	23.2384	16.2487	17.9744	-0.543134	0.585784	down	no	-0.409261	0.211469	down	no	serine-threonine protein kinase, putative
AFLA_002980	202.739	248.633	338.207	0.202655	0.967485	up	no	0.606606	0.0652865	up	no	N,N-dimethylglycine oxidase
AFLA_002990	17.4459	12.4395	12.5805	-0.50199	0.614742	down	no	-0.468204	0.124137	down	no	DNA polymerase delta catalytic subunit Cdc2, putative
AFLA_003000	0.654149	0.259772	0.91514	-1.5112	0.755315	down	no	0.356753	0.811989	up	no	conserved hypothetical protein
AFLA_003010	0.0635805	0.0328825	0.293912	-0.998861	1	down	no	2.09239	0.276819	up	no	alcohol dehydrogenase, putative
AFLA_003020	11.3327	9.69687	10.3222	-0.210776	0.931926	down	no	-0.14985	0.823074	down	no	conserved hypothetical protein
AFLA_003030	0.201821	0.213897	0	0.178868	1	up	no	#NAME?	0.359931	down	no	conserved hypothetical protein
AFLA_003040	78.9544	121.608	77.2929	0.616599	0.421036	up	no	-0.0665921	0.896657	down	no	conserved hypothetical protein
AFLA_003050	8.39112	23.9493	25.3583	1.49998	0.0401255	up	yes	1.5298	0.000105006	up	yes	RTA1 domain protein, putative
AFLA_003060	8.77263	8.83759	10.827	-0.0218454	1	down	no	0.238653	0.71005	up	no	conserved hypothetical protein
AFLA_003070	0.658291	0.130006	0.664501	-2.27391	0.130104	down	no	0.0439861	1	up	no	conserved hypothetical protein
AFLA_003080	0.530867	0.0901348	0.501184	-2.51171	0.534733	down	no	-0.109262	1	down	no	hypothetical protein
AFLA_003090	71.0618	365.473	586.76	2.32852	0.00818659	up	yes	2.95786	6.6e-15	up	yes	conserved hypothetical protein
AFLA_003100	1.11117	3.22003	6.31892	1.44116	0.300125	up	no	2.38855	0.00419737	up	yes	C2H2 finger domain protein, putative
AFLA_003110	19.1879	18.5908	26.2427	-0.10553	1	down	no	0.351449	0.511218	up	no	cyanate hydratase, putative
AFLA_003120	0.13306	0.229627	0.522269	0.844992	0.869551	up	no	1.9328	0.195275	up	no	conserved hypothetical protein
AFLA_003130	0.019418	0.165608	0.0599115	3.17888	0.349786	up	no	1.65587	0.818488	up	no	caffeine resistance protein, putative
AFLA_003140	0.268889	0.24928	0.0885919	-0.207544	1	down	no	-1.76328	0.458248	down	no	conserved hypothetical protein
AFLA_003150	4.38424	3.61439	3.07953	-0.273371	0.889416	down	no	-0.527325	0.306546	down	no	conserved hypothetical protein
AFLA_003160	0.919944	0.515555	0.128486	-0.822344	0.83493	down	no	-2.88363	0.0624315	down	no	conserved hypothetical protein
AFLA_003170	0.182111	0.213382	0.233641	0.293146	1	up	no	0.398604	1	up	no	caffeine resistance protein, putative
AFLA_003180	0	0.135288	0	Inf	0.832354	up	no					conserved hypothetical protein
AFLA_003200	0.549074	1.48546	1.7536	1.33991	0.373538	up	no	1.56477	0.0691787	up	no	hypothetical protein
AFLA_003210	0.131574	0.0851904	0.134143	-0.640717	1	down	no	0.148837	1	up	no	conserved hypothetical protein
AFLA_003220	64.7847	254.868	187.998	1.9816	0.00668104	up	yes	1.49772	7.78e-08	up	yes	phospholipase D (PLD), putative
AFLA_003230	91.5108	143.384	131.304	0.575	0.569235	up	no	0.458236	0.119823	up	no	conserved hypothetical protein
AFLA_003240	56.1331	99.1278	102.414	0.749119	0.490515	up	no	0.777611	0.081396	up	no	hypothetical protein
AFLA_003250	109.227	195.03	202.645	0.776478	0.373573	up	no	0.811382	0.00977591	up	no	conserved hypothetical protein
AFLA_003260	71.9324	187.322	97.1143	1.38787	0.0436959	up	yes	0.392323	0.188441	up	no	rhomboid family membrane protein
AFLA_003270	48.4092	180.244	110.384	1.89212	0.00154034	up	yes	1.13137	0.0046677	up	yes	DHHC zinc finger membrane protein
AFLA_003280	32.5672	54.8895	44.6303	0.717527	0.385426	up	no	0.38252	0.353321	up	no	ubiquitin conjugating enzyme (UbcF), putative
AFLA_003290	2.10639	5.93945	11.1415	1.49576	0.127535	up	no	2.36519	0.000474561	up	yes	hypothetical protein
AFLA_003300	0.23842	0	0.0820266	#NAME?	0.728257	down	no	-1.53304	0.845066	down	no	helicase, putative
AFLA_003310	0.754827	0.200253	0.313706	-2.00728	0.739296	down	no	-1.28417	0.733901	down	no	hypothetical protein
AFLA_003320	1.10288	0	0.600541	#NAME?	0.262728	down	no	-1.02419	0.652661	down	no	hypothetical protein
AFLA_003330	1.98568	1.29402	0.853475	-0.719635	0.849543	down	no	-1.33011	0.352181	down	no	hypothetical protein
AFLA_003340	0.0919017	0.24356	0.368937	1.44634	0.52446	up	no	2.00404	0.0687996	up	no	conserved hypothetical protein
AFLA_003350	0.104114	0.398415	0.192716	2.03506	0.737778	up	no	0.942212	0.995375	up	no	conserved hypothetical protein
AFLA_003360	1.48987	1.88188	2.33631	0.334445	0.86938	up	no	0.619576	0.468041	up	no	ankyrin repeat and socs box protein, putative
AFLA_003380	1.15238	1.0419	1.6661	-0.15	1	down	no	0.496253	0.663367	up	no	conserved hypothetical protein
AFLA_003390	7.14642	3.94953	4.66094	-0.886707	0.392256	down	no	-0.616361	0.0754068	down	no	TFIIIC transcription initiation factor complex subunits Tfc3
AFLA_003400	188.794	271.663	185.385	0.482865	0.609909	up	no	-0.0812207	0.839723	down	no	conserved hypothetical protein
AFLA_003410	26.3933	34.6122	32.2145	0.37612	0.790434	up	no	0.274479	0.6352	up	no	DUF858 domain protein
AFLA_003420	27.6232	45.6488	25.1871	0.667954	0.400349	up	no	-0.201917	0.643485	down	no	ribosomal N-lysine methyltransferase, putative
AFLA_003430	4.55616	4.443	4.89025	-0.0720155	1	down	no	0.0718661	0.921757	up	no	hypothetical protein
AFLA_003440	160.437	78.8111	69.1278	-1.06535	0.279431	down	no	-1.23166	9.44e-09	down	yes	translation initiation factor 4B
AFLA_003450	14.3866	12.6708	9.30078	-0.231746	0.905321	down	no	-0.680052	0.0689645	down	no	hypothetical protein
AFLA_003460	45.7055	56.8937	34.3436	0.31848	0.798798	up	no	-0.452317	0.290457	down	no	conserved hypothetical protein
AFLA_003470	21.4971	17.7942	15.4796	-0.307076	0.823856	down	no	-0.504132	0.213384	down	no	oxidoreductase family, NAD-binding Rossmann fold protein
AFLA_003480	2634.3	1294.21	1575.84	-1.0257	0.187467	down	no	-0.750713	0.00129403	down	no	60S ribosomal protein L32
AFLA_003490	45.7767	32.1534	32.1208	-0.51158	0.535162	down	no	-0.504336	0.0793913	down	no	DRAP deaminase (Rib2), putative
AFLA_003500	10.9407	7.70516	6.98193	-0.478335	0.743968	down	no	-0.635017	0.264812	down	no	thioesterase family protein
AFLA_003510	224.639	235.035	211.198	-0.00871483	1	down	no	-0.15599	0.705917	down	no	conserved hypothetical protein
AFLA_003520	156.015	207.478	240.555	0.35558	0.734836	up	no	0.561616	0.0863424	up	no	hypothetical protein
AFLA_003530	22.4292	17.2693	16.2218	-0.463478	0.719973	down	no	-0.545222	0.114621	down	no	dihydroxy acid dehydratase, putative
AFLA_003540	115.993	61.5533	44.9658	-0.929938	0.1657	down	no	-1.3809	1.2e-09	down	yes	DnaJ domain protein (Mas5), putative
AFLA_003550	21.6286	18.6594	13.2217	-0.233587	0.86511	down	no	-0.732408	0.0213269	down	no	glutamyl-tRNA synthetase
AFLA_003590	64.6735	47.2639	51.6083	-0.483175	0.598862	down	no	-0.345481	0.18748	down	no	cell division control protein Cdc25, putative
AFLA_003600	3.60175	2.68103	1.63645	-0.492352	0.934224	down	no	-1.16468	0.340791	down	no	hypothetical protein
AFLA_003610	2.78124	5.36602	1.36262	0.916899	0.566228	up	no	-1.11729	0.451261	down	no	hypothetical protein
AFLA_003620	1.03699	1.37967	0.992226	0.484127	0.932977	up	no	-0.0135516	1	down	no	conserved hypothetical protein
AFLA_003630	130.713	112.709	105.859	-0.230398	0.864384	down	no	-0.32245	0.27308	down	no	C2H2 finger domain protein, putative
AFLA_003640	13.7526	20.0079	16.2939	0.526782	0.582639	up	no	0.212088	0.724587	up	no	chromosome condensation protein (CrcB), putative
AFLA_003650	92.4953	86.0916	170.827	-0.148965	0.999519	down	no	0.808676	0.1007	up	no	uracil phosphoribosyltransferase
AFLA_003660	6.94971	5.03615	4.7153	-0.478015	0.639726	down	no	-0.560007	0.21911	down	no	conserved hypothetical protein
AFLA_003670	6.41419	5.84073	7.17076	-0.145292	0.933131	down	no	0.15119	0.799726	up	no	DEAD/DEAH box helicase, putative
AFLA_003680	0.291188	1.8722	0.727101	2.53565	0.164477	up	no	1.18651	0.634073	up	no	conserved hypothetical protein
AFLA_003690	41.1113	50.7992	47.0033	0.280912	0.844479	up	no	0.163085	0.754261	up	no	phosphoric ester hydrolase, putative
AFLA_003700	123.722	28.4334	15.3681	-2.16379	0.000113356	down	yes	-3.07228	6.36e-46	down	yes	mitochondrial cytochrome b2, putative
AFLA_003710	367.546	330.786	244.959	-0.298501	1	down	no	-0.686404	0.0172799	down	no	hypothetical protein
AFLA_003720	190.666	218.991	119.182	0.0769727	0.999519	up	no	-0.759555	0.0138584	down	no	sugar transporter, putative
AFLA_003730	56.5141	42.8599	41.9845	-0.415362	0.728784	down	no	-0.462629	0.148362	down	no	ras-like GTP-binding protein, putative
AFLA_003740	48.5681	52.5813	45.1495	0.133316	1	up	no	-0.0895947	0.829469	down	no	conserved hypothetical protein
AFLA_003750	0	0	0.338529					Inf	0.494844	up	no	hypothetical protein
AFLA_003760	2.09689	2.18215	1.30261	0.030475	1	up	no	-0.733808	0.111112	down	no	NACHT domain protein
AFLA_003770	1.29742	1.10686	0.896964	-0.253287	0.952006	down	no	-0.570218	0.447266	down	no	ankyrin repeat-containing protein, putative
AFLA_003780	4.16074	3.59117	1.96347	-0.263493	0.948955	down	no	-1.15268	0.0481079	down	yes	choline/ethanolamine kinase, putative
AFLA_003790	0.993639	3.17185	3.06491	1.63239	0.60126	up	no	1.63	0.259451	up	no	conserved hypothetical protein
AFLA_003800	0.06837	0.0708845	0.145388	0.155451	1	up	no	1.18704	0.974826	up	no	hypothetical protein
AFLA_003810	1.26908	6.13164	3.43204	2.27986	0.00055516	up	yes	1.39419	0.0269439	up	yes	endonuclease/exonuclease/phosphatase family protein
AFLA_003820	3.47977	1.89594	2.00071	-1.01162	0.55412	down	no	-0.929131	0.640304	down	no	hypothetical protein
AFLA_003830	0.109042	0.0997442	0.0447968	-0.139422	1	down	no	-1.23201	0.872502	down	no	efflux pump antibiotic resistance protein, putative
AFLA_003840	0.194014	0.145478	0.0459443	-0.438995	1	down	no	-2.21457	0.663461	down	no	conserved hypothetical protein
AFLA_003850	0.777137	0.380041	0.682132	-1.16147	0.699295	down	no	-0.244215	0.848364	down	no	conserved hypothetical protein
AFLA_003860	0.242099	0.572185	0.144929	1.25433	0.543763	up	no	-0.845016	0.995095	down	no	conserved hypothetical protein
AFLA_003870	35.6319	69.5369	45.5137	0.912143	0.181202	up	no	0.285629	0.381719	up	no	inositol polyphosphate phosphatase, putative
AFLA_003880	70.5829	81.0916	66.263	0.194779	0.884036	up	no	-0.125393	0.807971	down	no	conserved hypothetical protein
AFLA_003890	135.555	160.446	195.337	0.211857	0.858012	up	no	0.46985	0.127738	up	no	proteasome component Pre6, putative
AFLA_003900	54.2804	56.7805	46.9783	0.0575484	1	up	no	-0.232105	0.620438	down	no	RNA binding protein (Arp), putative
AFLA_003910	31.2575	22.8905	26.0832	-0.451101	0.636593	down	no	-0.271107	0.419284	down	no	nuclear condensin complex subunit 3, putative
AFLA_003920	27.9001	44.9166	40.8418	0.705032	0.384408	up	no	0.533504	0.157069	up	no	cysteine synthase (o-acetylserine (thiol)-lyase) (csase)
AFLA_003930	24.6796	26.6014	24.5811	0.041012	1	up	no	-0.0717055	0.898794	down	no	sulfite oxidase, putative
AFLA_003940	0.255444	0.127203	0.281818	-0.957227	1	down	no	0.13921	1	up	no	conserved hypothetical protein
AFLA_003950	30.3861	35.0104	74.8669	0.170631	0.881756	up	no	1.22989	9.86e-05	up	yes	GNAT family acetyltransferase, putative
AFLA_003960	16.6199	22.9722	177.846	0.419081	0.740028	up	no	3.33007	5.23e-09	up	yes	hypothetical protein
AFLA_003970	0	0	0.0802361					Inf	1	up	no	conserved hypothetical protein
AFLA_003980	63.1142	15.4047	58.561	-2.08831	0.000113356	down	yes	-0.160498	0.706992	down	no	cation efflux protein/ zinc transporter, putative
AFLA_003990	7.52436	8.14537	14.2114	0.111268	0.970278	up	no	0.880498	0.0577378	up	no	conserved hypothetical protein
AFLA_004000	1.20784	2.01611	0.713408	0.757333	0.72603	up	no	-0.811015	0.78472	down	no	conserved hypothetical protein
AFLA_004010	0.208469	0.0893218	0.281538	-1.16942	0.774871	down	no	0.462972	0.887345	up	no	conserved hypothetical protein
AFLA_004020	63.5422	52.9747	79.7999	-0.313343	0.863524	down	no	0.260922	0.541371	up	no	conserved hypothetical protein
AFLA_004030	287.596	249.948	458.161	-0.288981	0.888654	down	no	0.571221	0.124173	up	no	hypothetical protein
AFLA_004040	73.3944	70.5475	53.3709	-0.0634386	1	down	no	-0.482993	0.0716909	down	no	actin interacting protein 2
AFLA_004050	21.141	12.9961	10.9526	-0.686643	0.439741	down	no	-0.930838	0.00306097	down	no	Mst3-like protein kinase, putative
AFLA_004060	65.2268	59.4338	47.8057	-0.171553	0.937985	down	no	-0.48913	0.0807303	down	no	conserved hypothetical protein
AFLA_004070	85.2856	154.597	89.4564	0.854796	0.21913	up	no	0.0458965	1	up	no	Mitochondrial import inner membrane translocase subunit TIM22, putative
AFLA_004080	4.79295	5.91017	8.09752	0.24722	0.885043	up	no	0.701551	0.1631	up	no	conserved hypothetical protein
AFLA_004090	198.253	283.41	685.667	0.511935	0.535864	up	no	1.75594	6.21e-10	up	yes	conserved hypothetical protein
AFLA_004100	35.5435	22.8989	43.8745	-0.677765	0.46566	down	no	0.246903	0.71005	up	no	transesterase (LovD), putative
AFLA_004110	2.91214	5.69929	5.66075	1.00714	0.571624	up	no	0.998239	0.300145	up	no	conserved hypothetical protein
AFLA_004120	1.18779	2.3797	0.89473	0.9153	0.684946	up	no	-0.492321	0.880185	down	no	hypothetical protein
AFLA_004130	0	0	0.229523					Inf	1	up	no	hypothetical protein
AFLA_004140	2.67205	1.59534	16.0428	-0.937455	0.863968	down	no	2.43729	0.00608834	up	yes	hypothetical protein
AFLA_004150	0.608931	0.904323	7.38611	0.535525	0.869167	up	no	3.53708	2.13e-06	up	yes	conserved hypothetical protein
AFLA_004160	0.782937	2.44986	3.12276	1.70252	0.107942	up	no	2.02663	0.000536448	up	yes	ankyrin repeat-containing protein, putative
AFLA_004170	2.81527	1.57779	1.10471	-0.896915	0.548074	down	no	-1.41953	0.0453398	down	yes	cyanamide hydratase, putative
AFLA_004180	19.5666	29.1189	19.4175	0.558123	0.524164	up	no	-0.0496992	0.974826	down	no	UMTA methyltransferase family protein
AFLA_004190	108.715	68.8367	112.727	-0.741307	0.634543	down	no	-0.0696697	1	down	no	conserved hypothetical protein
AFLA_004200	502.733	447.262	400.321	-0.154076	0.948464	down	no	-0.332899	0.247682	down	no	GPI anchored glycoprotein, putative
AFLA_004210	4.32029	2.44965	3.63851	-0.786795	0.582284	down	no	-0.238979	0.818069	down	no	conserved hypothetical protein
AFLA_004220	5.56213	5.63602	5.79667	0.0172136	1	up	no	0.0356981	1	up	no	FAD dependent oxidoreductase, putative
AFLA_004230	0	0.265853	0.225565	Inf	1	up	no	Inf	1	up	no	hypothetical protein
AFLA_004240	4.23416	4.7704	3.49694	0.222327	0.937804	up	no	-0.279097	0.734712	down	no	conserved hypothetical protein
AFLA_004250	6.22764	2.95413	2.69582	-1.12538	0.313938	down	no	-1.29749	0.0213973	down	yes	zinc binding dehydrogenase, putative
AFLA_004260	3.07506	0.693079	0.362079	-2.1661	0.104013	down	no	-3.07761	0.00131633	down	yes	MFS transporter, putative
AFLA_004270	1.58756	1.24022	1.04645	-0.367712	0.852673	down	no	-0.609072	0.427571	down	no	conserved hypothetical protein
AFLA_004280	1.90337	1.22201	1.97078	-0.598993	0.841817	down	no	0.0194733	1	up	no	C6 transcription factor, putative
AFLA_004290	10.9959	10.5111	11.3232	-0.0802438	1	down	no	0.0138667	1	up	no	conserved hypothetical protein
AFLA_004300	0.104483	0.119929	0.241205	0.168395	1	up	no	1.18673	0.57496	up	no	prenyltransferase, putative
AFLA_004350	1.28556	4.23725	0.521649	1.63205	0.168217	up	no	-1.41219	0.098262	down	no	phosphatidylserine decarboxylase family protein
AFLA_004360	0.641505	0.371944	0.399463	-0.825164	0.801203	down	no	-0.696668	0.770144	down	no	alcohol dehydrogenase, putative
AFLA_004370	7.21904	4.68441	4.41233	-0.615164	0.568841	down	no	-0.721524	0.112555	down	no	cytochrome P450 oxidoreductase, putative
AFLA_004380	4.08032	2.21499	2.5528	-1.01554	0.538938	down	no	-0.797009	0.26348	down	no	xylosidase : arabinofuranosidase, putative
AFLA_004390	0.190213	0.225776	0.100886	0.209286	1	up	no	-0.977019	0.975504	down	no	conserved hypothetical protein
AFLA_004400	23.6276	20.6401	24.1469	-0.278511	0.943937	down	no	-0.0820138	1	down	no	trypsin Inhibitor like cysteine rich domain containing protein
AFLA_004410	1.22862	0.0933173	0.0907588	-3.79215	0.223995	down	no	-3.96137	0.0576706	down	no	conserved hypothetical protein
AFLA_004420	4.1046	3.21116	1.69705	-0.299361	0.914202	down	no	-1.24032	0.0438256	down	yes	phospholipase D precursor, putative
AFLA_004440	0.101612	0.320237	0.160937	1.66131	0.258719	up	no	0.677359	0.687901	up	no	ABC multidrug transporter, putative
AFLA_004450	0.582892	1.11712	0.817221	0.922247	0.258719	up	no	0.467113	0.397255	up	no	nonribosomal peptide synthase, putative
AFLA_004460	187.563	357.016	240.595	0.944459	0.20415	up	no	0.349515	0.471719	up	no	fatty acid desaturase family protein
AFLA_004470	0	0.661126	0.270063	Inf	0.29041	up	no	Inf	0.494844	up	no	conserved hypothetical protein
AFLA_004480	0.764199	1.34252	1.92062	0.779026	0.669534	up	no	1.31565	0.0798446	up	no	endo-1,3(4)-beta-glucanase, putative
AFLA_004490	0	0	0.117793					Inf	1	up	no	conserved hypothetical protein
AFLA_004500	23.5338	28.156	23.2721	0.267883	0.862598	up	no	-0.0200589	0.967639	down	no	potassium ion transporter (Trk1), putative
AFLA_004510	530.004	191.263	120.13	-1.54296	0.0963833	down	no	-2.238	4.78e-16	down	yes	peroxidase, putative
AFLA_004520	37.1112	36.2779	28.2642	-0.0578084	1	down	no	-0.439245	0.190915	down	no	alpha/beta hydrolase, putative
AFLA_004530	33.2694	30.0155	9.23906	-0.184927	0.953993	down	no	-1.87313	5.71e-09	down	yes	conserved hypothetical protein
AFLA_004540	9.84115	9.98628	5.46641	-0.0191553	1	down	no	-0.869715	0.080504	down	no	hydrolase, carbon-nitrogen family, putative
AFLA_004550	113.78	173.175	149.147	0.551764	0.537522	up	no	0.323867	0.337252	up	no	vacuolar dynamin-like GTPase VpsA, putative
AFLA_004560	100.034	133.93	124.942	0.39154	0.704416	up	no	0.270274	0.429103	up	no	vacuolar ATP synthase catalytic subunit A, putative
AFLA_004570	6.70818	6.79761	2.74956	-0.044525	1	down	no	-1.31766	0.00312825	down	yes	conserved hypothetical protein
AFLA_004580	11.9707	19.88	15.8826	0.610236	0.758837	up	no	0.286936	0.890533	up	no	Auxin Efflux Carrier superfamily
AFLA_004590	42.6553	43.3092	38.1429	-0.0446475	1	down	no	-0.235307	0.490123	down	no	catabolite degradation protein, putative
AFLA_004600	68.8858	65.892	56.3536	-0.0734177	0.995495	down	no	-0.29996	0.312221	down	no	eukaryotic translation initiation factor eIF-4A subunit, putative
AFLA_004610	22.1899	18.8722	18.6238	-0.244666	0.853866	down	no	-0.267782	0.388462	down	no	ATP dependent DNA ligase domain protein
AFLA_004620	7.65928	9.44184	8.81768	0.309998	0.828988	up	no	0.187954	0.798362	up	no	20S cyclosome subunit (APC8), putative
AFLA_004630	68.1753	55.7955	82.1802	-0.292319	0.815414	down	no	0.257017	0.487865	up	no	farnesyl-pyrophosphate synthetase
AFLA_004640	7.94952	5.2521	5.45711	-0.60165	0.531957	down	no	-0.549421	0.211142	down	no	conserved hypothetical protein
AFLA_004650	467.887	915.84	1452.63	0.929643	0.25292	up	no	1.57235	5.18e-08	up	yes	thiamine biosynthesis protein (Nmt1), putative
AFLA_004660	32.9727	32.3703	41.0459	-0.0825577	1	down	no	0.243301	0.470746	up	no	glycogen synthase Gsy1, putative
AFLA_004670	9.71991	8.76425	8.45512	-0.196297	0.943094	down	no	-0.245712	0.707906	down	no	zinc-binding oxidoreductase, putative
AFLA_004680	4.17313	6.11009	6.40785	0.539273	0.832354	up	no	0.581031	0.645242	up	no	hypothetical protein
AFLA_004690	1044.99	1256.57	842.87	0.201399	0.920195	up	no	-0.396627	0.57224	down	no	conserved hypothetical protein
AFLA_004700	9.88946	15.7771	17.2813	0.694744	0.387691	up	no	0.800273	0.0162909	up	no	GARP complex component (Vps54), putative
AFLA_004710	37.5418	21.7761	17.3262	-0.774062	0.397066	down	no	-1.09231	4.47e-05	down	yes	DNA replication licensing factor Mcm5, putative
AFLA_004720	2.53122	2.45046	0.972478	-0.0211353	1	down	no	-1.34184	0.0627891	down	no	conserved hypothetical protein
AFLA_004730	22.5551	44.9712	68.339	0.988052	0.121922	up	no	1.5624	5.96e-07	up	yes	ribokinase
AFLA_004740	17.7807	16.7053	21.2561	-0.0671931	0.995495	down	no	0.281452	0.727401	up	no	conserved hypothetical protein
AFLA_004750	24.8108	17.2791	17.7551	-0.617449	0.679525	down	no	-0.561757	0.0876402	down	no	RNA polymerase III transcription factor subunit, putative
AFLA_004760	33.9406	51.2476	47.939	0.592978	0.479768	up	no	0.477487	0.142836	up	no	protein phosphatase regulatory subunit (Ssc1), putative
AFLA_004770	10.4835	9.10895	9.3222	-0.216201	0.866521	down	no	-0.182823	0.606412	down	no	histone acetylase complex subunit Paf400, putative
AFLA_004780	64.5531	71.7508	67.7355	0.146853	0.94382	up	no	0.045204	1	up	no	mRNA splicing protein Yju2
AFLA_004790	8.8252	12.447	10.6772	0.492948	0.651835	up	no	0.262889	0.648054	up	no	20S cyclosome subunit (Cut9/Cdc16), putative
AFLA_004800	3.75344	11.9502	9.60664	1.64901	0.0058568	up	yes	1.30001	0.00506205	up	yes	arylsulfatase, putative
AFLA_004810	1.79718	4.2599	3.91137	1.22004	0.179187	up	no	1.10396	0.0969391	up	no	nuclear pore glycoprotein p62, putative
AFLA_004820	1.49714	2.74463	2.9677	0.822926	0.595497	up	no	0.946572	0.206641	up	no	conserved hypothetical protein
AFLA_004830	15.3176	74.657	54.8356	2.23861	0.00963597	up	yes	1.74798	9.94e-07	up	yes	endoplasmic reticulum-resident kdel protein, putative
AFLA_004840	0.107715	0.554109	0.465831	2.47075	0.652975	up	no	2.17288	0.635416	up	no	thioredoxin, putative
AFLA_004850	0.297954	0	0	#NAME?	0.846994	down	no	#NAME?	0.677803	down	no	hypothetical protein
AFLA_004860	0.392193	0.373366	0.642231	-0.212937	1	down	no	0.614855	0.610541	up	no	cytochrome P450, putative
AFLA_004870	1.98962	1.94016	2.87726	-0.0425241	1	down	no	0.508364	0.459535	up	no	cytochrome P450, putative
AFLA_004880	0.0497418	0.0242228	0.072947	-1.04635	1	down	no	0.447655	1	up	no	amine oxidase, flavin-containing superfamily
AFLA_004890	1.4968	1.53663	0.687762	0.0232388	1	up	no	-1.10516	0.303303	down	no	conserved hypothetical protein
AFLA_004900	29.0033	33.7378	28.9165	0.193328	0.91334	up	no	-0.0397609	0.973456	down	no	C6 transcription factor, putative
AFLA_004910	66.1671	30.6009	32.1169	-1.3684	0.708346	down	no	-1.25542	4.43e-07	down	yes	MFS multidrug transporter, putative
AFLA_004920	54.5075	35.0103	27.7487	-0.673894	0.588915	down	no	-0.976995	1.22e-05	down	no	phosphoribosylformylglycinamidine synthase
AFLA_004930	5.91315	7.31874	9.05914	0.28703	0.864048	up	no	0.594212	0.156829	up	no	gamma-tubulin complex component GCP5, putative
AFLA_004940	28.1027	38.4569	45.0507	0.470517	0.65687	up	no	0.682142	0.0480826	up	no	alpha-1,2-mannosyltransferase (Ktr4), putative
AFLA_004950	952.14	1465.54	1438.5	0.580898	0.548405	up	no	0.538541	0.0717029	up	no	cytochrome c oxidase subunit Va, putative
AFLA_004960	91.2705	67.9049	64.5994	-0.452568	0.703693	down	no	-0.535104	0.320435	down	no	antibiotic biosynthesis monooxygenase family protein
AFLA_004970	155.501	103.005	103.898	-0.619065	0.435022	down	no	-0.603723	0.0759014	down	no	fatty acid elongase (Gns1), putative
AFLA_004980	26.4138	25.4603	43.1104	-0.144502	0.967845	down	no	0.621502	0.14395	up	no	conserved hypothetical protein
AFLA_005010	0.0338094	0	0	#NAME?	0.876886	down	no	#NAME?	0.733901	down	no	glucokinase regulator family protein, putative
AFLA_005020	0.707518	0.550569	0.690154	-0.363633	0.937614	down	no	-0.0504383	1	down	no	conserved hypothetical protein
AFLA_005030	2.21504	0.611408	1.09107	-1.86859	0.0343908	down	yes	-1.05749	0.174276	down	no	conserved hypothetical protein
AFLA_005040	31.2063	20.3835	21.1444	-0.689921	0.606818	down	no	-0.668813	0.0887566	down	no	phenazine biosynthesis-like protein, putative
AFLA_005050	9.93955	7.84645	16.1269	-0.36378	0.853428	down	no	0.652874	0.208838	up	no	conserved hypothetical protein
AFLA_005070	0.76036	0.879388	0.938847	0.191327	1	up	no	0.279234	0.89853	up	no	alcohol dehydrogenase, putative
AFLA_005090	0.0845117	0.152501	0	0.959959	0.872327	up	no	#NAME?	0.353251	down	no	conserved hypothetical protein
AFLA_005100	1.30064	0.646735	1.93261	-0.970505	0.405996	down	no	0.578243	0.410785	up	no	conserved hypothetical protein
AFLA_005110	1.46598	1.30209	2.88954	-0.175731	1	down	no	0.949205	0.144828	up	no	conserved hypothetical protein
AFLA_005120	11.9693	15.6325	16.5376	0.390373	0.735102	up	no	0.444943	0.342569	up	no	sarcosine oxidase, putative
AFLA_005130	23.6301	8.7305	6.32896	-1.42231	0.0257572	down	yes	-1.92172	0.000772485	down	yes	L-lysine 2,3-aminomutase, putative
AFLA_005140	27.6337	25.718	23.0592	-0.155814	0.968261	down	no	-0.318646	0.531792	down	no	hypothetical protein
AFLA_005150	236.057	240.603	192.293	-0.0131934	1	down	no	-0.336581	0.260538	down	no	conserved hypothetical protein
AFLA_005160	1.30165	1.42389	1.03501	0.0949164	1	up	no	-0.372997	0.872154	down	no	conserved hypothetical protein
AFLA_005180	56.8557	11.4622	15.266	-2.32125	6.98e-06	down	yes	-1.90506	6.43e-13	down	yes	AAA family ATPase, putative
AFLA_005190	10.6851	25.7292	15.2588	1.29416	0.322367	up	no	0.55469	0.677803	up	no	hypothetical protein
AFLA_005200	0.983267	1.17648	1.29186	0.184328	1	up	no	0.273644	0.944685	up	no	hypothetical protein
AFLA_005210	0.844771	2.77799	2.96612	1.76058	0.0647063	up	no	1.81099	0.00561893	up	yes	hypothetical protein
AFLA_005220	0.222023	0	0.149758	#NAME?	0.684204	down	no	-0.815259	0.935696	down	no	hypothetical protein
AFLA_005230	0.995406	1.13889	0.136698	0.0685545	1	up	no	-3.03159	0.288118	down	no	hypothetical protein
AFLA_005250	0.0374354	0	0	#NAME?	1	down	no	#NAME?	1	down	no	hypothetical protein
AFLA_005260	0.1698	0.0805587	0.162352	-1.12239	0.674236	down	no	-0.0943499	1	down	no	hypothetical protein
AFLA_005270	0	0.0290385	0.0228624	Inf	1	up	no	Inf	1	up	no	conserved hypothetical protein
AFLA_005290	1.69865	1.00185	1.10267	-0.741689	0.571624	down	no	-0.626788	0.369485	down	no	conserved hypothetical protein
AFLA_005300	0	0.0841235	0	Inf	0.652975	up	no					ankyrin repeat-containing protein, putative
AFLA_005310	105.295	102.604	64.0205	-0.113215	1	down	no	-0.816882	0.284416	down	no	vacuolar ATP synthase proteolipid subunit, putative
AFLA_005320	0.343849	1.18832	0.631824	1.72999	0.0103632	up	yes	0.808582	0.177302	up	no	polyketide synthase, putative
AFLA_005330	7.80902	14.2048	6.40794	0.826948	0.316649	up	no	-0.344845	0.645006	down	no	conserved hypothetical protein
AFLA_005340	46.6521	125.196	110.128	1.35427	0.141568	up	no	1.14613	0.104913	up	no	conserved hypothetical protein
AFLA_005350	9.86609	48.7093	35.5596	2.2608	0.0142676	up	yes	1.76969	0.00500729	up	yes	hypothetical protein
AFLA_005360	0.509321	0.327411	0.229694	-0.662088	0.841086	down	no	-1.19372	0.295839	down	no	conserved hypothetical protein
AFLA_005370	0.550558	0.653331	3.40758	0.341068	1	up	no	2.67691	0.0748785	up	no	conserved hypothetical protein
AFLA_005380	0	0	0.124411					Inf	1	up	no	hypothetical protein
AFLA_005390	0.644082	3.35853	4.38883	2.3703	0.00265488	up	yes	2.76425	1.49e-05	up	yes	conserved hypothetical protein
AFLA_005400	5.94216	11.0082	9.54524	0.857185	0.364734	up	no	0.631216	0.32901	up	no	ankyrin repeat-containing protein, putative
AFLA_005410	4.9955	7.69773	7.12525	0.633676	0.474767	up	no	0.493411	0.297553	up	no	5-AMP-activated protein kinase, putative
AFLA_005420	0.306762	0.572488	0.547817	0.76641	0.914118	up	no	0.667488	0.885917	up	no	hypothetical protein
AFLA_005430	20.3542	27.517	28.7267	0.391193	0.708553	up	no	0.428895	0.26443	up	no	hypothetical protein
AFLA_005440	0.0262092	0.0235232	0.0235097	-0.396924	1	down	no	-0.276117	1	down	no	nonribosomal peptide synthase, putative
AFLA_005470	0.96897	0	1.03115	#NAME?	0.302871	down	no	0.154344	1	up	no	hypothetical protein
AFLA_005480	13.4228	12.2096	13.4397	-0.208192	0.943839	down	no	-0.0735987	0.965973	down	no	nADP transhydrogenase, putative
AFLA_005490	13.8883	10.0709	11.4736	-0.524578	0.696302	down	no	-0.338305	0.597787	down	no	nADP transhydrogenase, putative
AFLA_005500	57.6487	35.9943	62.308	-0.753908	0.423832	down	no	0.0479649	0.974826	up	no	hypothetical protein
AFLA_005510	101.131	94.3907	133.456	-0.171625	0.967402	down	no	0.329696	0.313017	up	no	amino acid permease, putative
AFLA_005520	33.8374	26.3298	28.8566	-0.381338	0.720642	down	no	-0.250768	0.488047	down	no	C6 transcription factor, putative
AFLA_005530	1.27029	1.20889	3.52077	-0.0742049	1	down	no	1.48263	0.0686013	up	no	glutathione-S-transferase theta, GST, putative
AFLA_005540	5.8479	7.6633	47.9379	0.370281	0.81485	up	no	3.01602	1.11e-17	up	yes	sugar transporter, putative
AFLA_005550	6.1539	9.26507	58.3859	0.541929	0.673962	up	no	3.20869	4.92e-17	up	yes	conserved hypothetical protein
AFLA_005560	2.86259	7.21563	22.9634	1.29051	0.101204	up	no	2.97643	2.1e-13	up	yes	integral membrane protein, putative
AFLA_005570	4.10579	7.09413	5.37709	0.718624	0.697453	up	no	0.286843	0.813887	up	no	oxidoreductase, short-chain dehydrogenase/reductase family
AFLA_005580	4.08319	7.72723	3.97161	0.923448	0.316574	up	no	-0.0580617	0.988206	down	no	conserved hypothetical protein
AFLA_005590	48.6915	20.4168	18.6492	-1.29041	0.317386	down	no	-1.37653	6.52e-06	down	yes	conserved hypothetical protein
AFLA_005600	9.89359	12.4401	14.7002	0.340513	0.794676	up	no	0.554355	0.192504	up	no	SNARE domain protein
AFLA_005610	121.926	65.2046	59.2773	-0.882137	0.216435	down	no	-1.03363	1.56e-05	down	yes	NAP family protein
AFLA_005620	26.314	15.0577	17.4006	-0.818839	0.436877	down	no	-0.589489	0.0976676	down	no	nitrogen metabolite repression regulator NmrA
AFLA_005630	5.18579	4.69387	8.40414	-0.179573	1	down	no	0.630822	0.566894	up	no	hypothetical protein
AFLA_005640	15.0863	12.1461	17.7573	-0.332587	0.811423	down	no	0.207719	0.707657	up	no	lysophospholipase, putative
AFLA_005650	29.7154	19.0939	50.3482	-0.754786	0.646663	down	no	0.657899	0.0664846	up	no	choline transport protein Ctr, putative
AFLA_005660	2.9186	4.0619	7.12021	0.459621	0.73637	up	no	1.25407	0.00875965	up	yes	conserved hypothetical protein
AFLA_005670	0.253372	0.614907	1.03416	1.19193	0.84398	up	no	1.9975	0.275998	up	no	conserved hypothetical protein
AFLA_005680	1.2726	1.4144	1.7939	0.0148029	1	up	no	0.354264	1	up	no	hypothetical protein
AFLA_005690	87.3242	195.96	170.035	1.13064	0.0866449	up	no	0.906182	0.00109409	up	no	LCCL domain protein
AFLA_005700	9.90111	17.18	19.308	0.788705	0.339774	up	no	0.950733	0.00902632	up	no	aromatic amino acid aminotransferase, putative
AFLA_005710	26.731	22.7509	31.3132	-0.248775	0.895499	down	no	0.214257	0.804911	up	no	Impact family protein
AFLA_005720	827.622	687.842	581.765	-0.305907	0.909033	down	no	-0.502834	0.353251	down	no	conserved hypothetical protein
AFLA_005730	1092.41	466.998	350.768	-1.2359	0.0786663	down	no	-1.63543	1.98e-15	down	yes	60S ribosomal protein L4, putative
AFLA_005740	18.1982	15.7559	19.2867	-0.214917	0.86511	down	no	0.0760846	0.925134	up	no	C6 transcription factor, putative
AFLA_005750	33.2612	47.0829	33.4998	0.45637	0.619432	up	no	-0.0463253	0.943998	down	no	DnaJ domain protein
AFLA_005760	21.4127	14.535	7.94633	-0.619538	0.618942	down	no	-1.46241	0.00958733	down	yes	conserved hypothetical protein
AFLA_005770	70.4083	88.817	68.6754	0.303392	0.813629	up	no	-0.0770593	0.84655	down	no	transcriptional regulator Cwf13/SkiP, putative
AFLA_005780	4.05057	6.35425	2.86212	0.649928	0.69065	up	no	-0.512428	0.6117	down	no	conserved hypothetical protein
AFLA_005790	15.8186	18.9471	21.8107	0.223532	0.938079	up	no	0.451458	0.321041	up	no	conserved hypothetical protein
AFLA_005800	45.7064	42.0504	25.0228	-0.149297	0.97395	down	no	-0.908763	0.00141697	down	no	WD repeat protein
AFLA_005810	65.3169	100.888	92.0651	0.622825	0.464969	up	no	0.475514	0.109595	up	no	septin
AFLA_005820	45.3474	16.5389	13.9803	-1.48244	0.381238	down	no	-1.67105	9.9e-13	down	yes	small nucleolar ribonucleoprotein complex subunit (Pwp2), putative
AFLA_005830	0.438161	0.880549	0.250661	0.988267	0.800217	up	no	-0.774392	0.574314	down	no	cytochrome P450 monooxygenase SirB-like, putative
AFLA_005840	8.34221	7.12303	5.2555	-0.305409	0.90456	down	no	-0.719738	0.169629	down	no	conserved hypothetical protein
AFLA_005850	28.9541	36.6167	40.3454	0.303856	0.825782	up	no	0.441256	0.173502	up	no	exonuclease Kem1, putative
AFLA_005860	60.0722	59.2725	64.1514	-0.0183768	1	down	no	0.0943947	0.924421	up	no	chromatin assembly factor 1 subunit C, putative
AFLA_005870	104.294	80.024	92.0273	-0.402123	0.698926	down	no	-0.201094	0.534764	down	no	GTP cyclohydrolase I, putative
AFLA_005880	2.21358	2.16064	1.14218	-0.0605844	1	down	no	-0.943139	0.111762	down	no	conserved hypothetical protein
AFLA_005890	38.7457	41.8004	47.821	0.062119	1	up	no	0.258762	0.653492	up	no	hypothetical protein
AFLA_005900	36.6076	48.5463	46.6796	0.380054	0.740602	up	no	0.319965	0.383434	up	no	protein kinase, putative
AFLA_005910	149.892	144.738	132.612	-0.0621307	1	down	no	-0.192483	0.548092	down	no	translation initiation factor eIF4E3, putative
AFLA_005920	8.964	9.07654	9.09588	0.0108717	1	up	no	0.01517	1	up	no	Ulp1 protease family protein
AFLA_005930	14.8108	21.7827	25.9635	0.499416	0.67656	up	no	0.730132	0.1405	up	no	disease resistance protein Aig2, putative
AFLA_005940	28.0569	45.6372	48.4269	0.719792	0.3819	up	no	0.768867	0.0343135	up	no	microsomal signal peptidase subunit (gp23), putative
AFLA_005950	141.069	107.999	71.5423	-0.469234	0.755369	down	no	-1.07935	6.39e-05	down	yes	stress response RCI peptide, putative
AFLA_005960	55.7445	74.306	93.7766	0.366285	0.720619	up	no	0.681333	0.0237031	up	no	pyruvate dehydrogenase kinase, putative
AFLA_005970	65.6119	87.4117	75.3958	0.38778	0.740028	up	no	0.164656	0.697631	up	no	ubiquitin C-terminal hydrolase, putative
AFLA_005980	145.858	159.825	183.153	0.143602	0.937985	up	no	0.310677	0.397358	up	no	endosomal cargo receptor (Erp3), putative
AFLA_005990	74.5307	72.8488	66.2116	-0.11689	0.995749	down	no	-0.246366	0.560758	down	no	conserved hypothetical protein
AFLA_006000	83.1937	83.8668	59.3502	-0.093513	1	down	no	-0.570056	0.321737	down	no	hypothetical protein
AFLA_006010	2.15483	1.37436	1.18167	-0.795679	0.859185	down	no	-0.951297	0.727691	down	no	conserved hypothetical protein
AFLA_006020	0.56516	2.05439	0.136698	1.76832	0.427663	up	no	-2.19739	0.663461	down	no	hypothetical protein
AFLA_006030	27.3552	35.7861	27.1404	0.38078	0.711715	up	no	-0.0464622	0.964422	down	no	female-specific protein transformer, putative
AFLA_006040	26.4468	89.1751	51.7047	1.74545	0.000650073	up	yes	0.932344	0.0040121	up	no	conserved hypothetical protein
AFLA_006050	2567.32	2443.73	2266.15	-0.156009	0.977215	down	no	-0.274863	0.34788	down	no	conserved hypothetical protein
AFLA_006060	193.136	275.097	244.791	0.424685	0.79901	up	no	0.237568	0.751873	up	no	conserved hypothetical protein
AFLA_006070	41.7768	68.332	45.5474	0.667664	0.443272	up	no	0.0849483	0.963312	up	no	TFIIH complex helicase Ssl2, putative
AFLA_006080	6.43895	13.1501	1.48108	0.940865	0.461092	up	no	-2.18571	0.0114677	down	yes	hypothetical protein
AFLA_006090	2.71951	6.16298	1.71327	1.10968	0.422208	up	no	-0.743291	0.614494	down	no	hypothetical protein
AFLA_006100	131.119	71.8225	47.0074	-0.951756	0.305304	down	no	-1.58302	2.13e-12	down	yes	HypA-like protein, putative
AFLA_006110	91.3396	110.751	104.792	0.255419	0.846969	up	no	0.158657	0.717426	up	no	conserved hypothetical protein
AFLA_006120	20.8599	18.1898	24.3901	-0.212336	0.896968	down	no	0.201446	0.650021	up	no	glutamine dependent NAD+ synthetase, putative
AFLA_006130	20.9918	18.9801	19.637	-0.163862	0.952128	down	no	-0.126337	0.833319	down	no	NADH pyrophosphatase, putative
AFLA_006140	10.0355	10.3557	9.90775	0.0335486	1	up	no	-0.0302809	0.951008	down	no	conserved hypothetical protein
AFLA_006150	11.9736	14.7909	28.5919	0.26808	0.841817	up	no	1.2021	0.000518415	up	yes	flavin dependent monooxygenase, putative
AFLA_006160	15.5174	16.3731	17.7035	0.050457	1	up	no	0.157055	0.780852	up	no	HDA1 complex subunit, putative
AFLA_006170	2.37584	1.05356	1.10677	-1.17274	0.107942	down	no	-1.10368	0.00585479	down	yes	polyketide synthetase PksP
AFLA_006180	0.617278	0.537386	0.499238	-0.154172	1	down	no	-0.273471	0.874236	down	no	conidial pigment biosynthesis oxidase Arb2/brown2
AFLA_006190	0.451208	0.250921	0.673205	-0.782806	0.935452	down	no	0.609106	0.869732	up	no	multicopper oxidase, putative
AFLA_006200	1.83643	1.42267	2.24216	-0.380755	0.968261	down	no	0.304898	0.969668	up	no	hypothetical protein
AFLA_006210	7.25681	10.1643	7.58265	0.498479	0.641233	up	no	0.0667927	1	up	no	SH3 domain protein (Cyk3), putative
AFLA_006220	21.53	24.4229	26.9078	0.163445	0.929394	up	no	0.287367	0.538136	up	no	exopolyphosphatase, putative
AFLA_006230	3.24718	4.45182	4.07463	0.436607	0.789388	up	no	0.30853	0.724587	up	no	1-aminocyclopropane-1-carboxylate deaminase, putative
AFLA_006240	20.5174	12.9071	13.257	-0.706167	0.388204	down	no	-0.676345	0.0115802	down	no	PHD transcription factor (Rum1), putative
AFLA_006250	40.8714	29.8376	56.092	-0.519394	0.687091	down	no	0.39056	0.419225	up	no	hypothetical protein
AFLA_006260	41.3045	26.2968	44.6208	-0.70561	0.438638	down	no	0.0564289	0.9492	up	no	thymidylate kinase
AFLA_006270	25.0076	20.9632	28.31	-0.259808	0.864843	down	no	0.159264	0.786413	up	no	tRNA-guanine transglycosylase family protein
AFLA_006280	35.8215	33.7023	43.1666	-0.110348	0.989249	down	no	0.237689	0.56844	up	no	methylenetetrahydrofolate reductase
AFLA_006290	20.4377	22.4988	27.2794	0.116745	0.966916	up	no	0.374699	0.463019	up	no	conserved hypothetical protein
AFLA_006300	1153.59	1680.51	2741.26	0.567205	0.597371	up	no	1.24022	1.39e-05	up	yes	nucleoside diphosphate kinase
AFLA_006310	15.9158	20.1163	25.6657	0.340624	0.79421	up	no	0.678337	0.0373706	up	no	alpha glucosidase II, alpha subunit, putative
AFLA_006320	35.7914	29.6481	30.474	-0.259854	0.857527	down	no	-0.237073	0.593627	down	no	PQ loop repeat protein
AFLA_006330	33.787	45.3011	75.0919	0.400736	0.699274	up	no	1.11197	0.000172057	up	yes	conserved hypothetical protein
AFLA_006340	4.10029	3.20268	5.52167	-0.362992	0.818817	down	no	0.43876	0.599409	up	no	conserved hypothetical protein
AFLA_006350	30.5224	35.1726	37.1205	0.170587	0.929642	up	no	0.234356	0.668663	up	no	thioredoxin reductase, putative
AFLA_006360	6.94976	5.67229	4.10039	-0.352121	0.846969	down	no	-0.796475	0.0301651	down	no	plasma membrane H(+)ATPase, putative
AFLA_006370	64.5357	68.6127	89.4649	0.0905637	1	up	no	0.466657	0.133257	up	no	glutamyl-tRNA synthetase
AFLA_006380	91.9888	102.943	99.5433	0.177323	0.921552	up	no	0.1056	0.905394	up	no	mitochondrial large ribosomal subunit protein L1, putative
AFLA_006390	16.2631	16.0292	18.5399	0.011445	1	up	no	0.197467	0.785269	up	no	conserved hypothetical protein
AFLA_006400	4.89099	4.73352	5.59352	-0.0797995	1	down	no	0.164586	0.84157	up	no	conserved hypothetical protein
AFLA_006410	24.1882	26.1396	23.311	0.0803143	1	up	no	-0.0635302	0.865386	down	no	nucleotide binding protein, putative
AFLA_006420	97.9529	114.257	120.539	0.171587	0.921829	up	no	0.244918	0.581304	up	no	Cdc48-dependent protein degradation adaptor protein (Shp1), putative
AFLA_006430	95.9882	122.093	160.604	0.343875	0.758837	up	no	0.716372	0.0334281	up	no	mitochondrial import protein, putative
AFLA_006440	74.9117	107.481	93.1704	0.536144	0.56512	up	no	0.309758	0.401104	up	no	mitochondrial export translocase Oxa1, putative
AFLA_006450	2.01755	2.48859	1.89309	0.248276	0.960118	up	no	-0.133476	0.986759	down	no	adenylate kinase 3, putative
AFLA_006460	14.2097	7.08261	10.1744	-1.05023	0.209634	down	no	-0.534222	0.576706	down	no	conserved hypothetical protein
AFLA_006470	25.2434	21.6274	21.7427	-0.216812	0.913878	down	no	-0.225508	0.693138	down	no	transcription initiation factor TFIID subunit beta, putative
AFLA_006490	177.021	111.362	93.7602	-0.691769	0.361291	down	no	-0.931548	4.31e-05	down	no	S-adenosylmethionine decarboxylase proenzyme
AFLA_006500	42.6164	33.4932	27.7531	-0.3467	0.769544	down	no	-0.616827	0.133012	down	no	TATA binding protein associated factor, putative
AFLA_006520	153.666	155.88	146.528	-0.032661	1	down	no	-0.137974	0.828861	down	no	CRAL/TRIO domain protein
AFLA_006530	57.7007	51.5061	72.486	-0.236163	0.943825	down	no	0.229608	0.669445	up	no	conserved hypothetical protein
AFLA_006540	14.9094	16.0687	22.5095	0.0944475	1	up	no	0.590529	0.0547682	up	no	conserved hypothetical protein
AFLA_006550	19.9101	18.4755	16.9713	-0.09646	0.966152	down	no	-0.222246	0.546127	down	no	chromatin assembly factor 1 subunit A, putative
AFLA_006560	141.328	284.788	210.832	0.986899	0.190386	up	no	0.516303	0.0676942	up	no	conserved hypothetical protein
AFLA_006570	114.824	177.562	137.294	0.584025	0.469752	up	no	0.202036	0.733342	up	no	isopenicillin N-CoA epimerase, putative
AFLA_006580	217.56	571.326	612.18	1.37401	0.0442702	up	yes	1.43411	1.77e-07	up	yes	WW domain protein
AFLA_006590	33.4435	60.5268	105.18	0.837375	0.248936	up	no	1.61996	5.79e-09	up	yes	class III chitinase ChiA1
AFLA_006600	11.116	7.37537	14.7222	-0.587218	0.708346	down	no	0.396245	0.646553	up	no	hypothetical protein
AFLA_006610	27.0219	15.2621	27.5728	-0.927268	0.380743	down	no	-0.0961676	1	down	no	lipase, putative
AFLA_006620	70.9364	73.6552	137.425	0.0334921	1	up	no	0.909863	0.00110225	up	no	ferrooxidoreductase Fet3, putative
AFLA_006630	95.802	65.0397	109.917	-0.575441	0.481841	down	no	0.185844	0.682111	up	no	high-affinity iron transporter FtrA
AFLA_006640	13.2599	17.1197	12.5365	0.384956	0.734836	up	no	-0.0951705	0.878577	down	no	spindle pole body associated protein SnaD, putative
AFLA_006650	53.076	52.3101	92.7374	-0.0184612	1	down	no	0.79343	0.0122244	up	no	class III chitinase, putative
AFLA_006660	25.8804	45.915	38.3538	0.778446	0.284096	up	no	0.513379	0.11735	up	no	alkaline phosphatase family protein
AFLA_006670	48.7718	75.028	65.3192	0.626299	0.427238	up	no	0.398789	0.244427	up	no	signal recognition particle protein SRP54
AFLA_006680	114.242	43.1768	56.6906	-1.42342	0.209178	down	no	-0.99629	6.96e-05	down	no	DUF1665 domain protein
AFLA_006690	80.9931	94.5435	91.7372	0.229464	0.875245	up	no	0.162369	0.715645	up	no	2Fe-2S iron-sulfur cluster binding domain protein
AFLA_006700	57.8343	91.13	76.5863	0.63681	0.444476	up	no	0.375228	0.363946	up	no	hypothetical protein
AFLA_006710	77.927	148.955	105.562	0.918533	0.212567	up	no	0.408358	0.354059	up	no	hypothetical protein
AFLA_006720	17.5439	17.6994	18.5335	-0.0223245	1	down	no	0.026277	1	up	no	bZIP transcription factor HapX
AFLA_006730	4.13949	5.19758	5.17716	0.282503	0.92025	up	no	0.288522	0.74243	up	no	alcohol dehydrogenase, putative
AFLA_006740	3.13263	3.02544	2.58581	-0.0927711	1	down	no	-0.326732	0.759296	down	no	glucan endo-1,3-alpha-glucosidase agn1 precursor, putative
AFLA_006750	48.8776	83.7611	77.3997	0.761932	0.292774	up	no	0.627037	0.0421824	up	no	vacuolar aspartyl aminopeptidase Lap4, putative
AFLA_006760	5.80542	5.5841	2.13147	-0.027028	1	down	no	-1.444	0.00123832	down	yes	integral membrane protein, putative
AFLA_006770	75.2583	34.9011	40.0275	-1.10353	0.116164	down	no	-0.900564	0.000540759	down	no	proteasome maturation ans ribosome synthesis protein Nop10, putative
AFLA_006780	722.71	335.083	387.017	-1.10032	0.0872056	down	no	-0.898682	8.92e-05	down	no	ribosome biogenesis protein nop10, putative
AFLA_006790	47.3118	21.5564	20.777	-1.15848	0.179928	down	no	-1.18563	5.43e-06	down	yes	tRNA-splicing endonuclease subunit Sen2, putative
AFLA_006800	7.16199	8.40938	7.23825	0.235451	0.971431	up	no	0.0343347	1	up	no	DNA damage repair protein (Rad9), putative
AFLA_006810	96.5512	91.4672	78.9146	-0.071092	1	down	no	-0.299265	0.338895	down	no	50S ribosomal protein L27, putative
AFLA_006820	49.8788	50.2774	50.0539	0.0226267	1	up	no	-0.0089608	0.999104	down	no	conserved hypothetical protein
AFLA_006830	37.6307	46.8019	37.986	0.265894	0.835856	up	no	-0.0632702	0.922626	down	no	scramblase family protein
AFLA_006840	227.211	407.01	281.209	0.831239	0.273681	up	no	0.2931	0.664956	up	no	ubiquitin conjugating enzyme (UbcH), putative
AFLA_006850	3.37006	3.927	2.20682	0.205529	1	up	no	-0.602815	0.540077	down	no	meiosis-specific topoisomerase Spo11, putative
AFLA_006860	17.6387	20.1351	25.2547	0.197846	0.923424	up	no	0.509978	0.147556	up	no	oxidosqualene:lanosterol cyclase
AFLA_006870	22.294	13.1487	19.9542	-0.818658	0.331614	down	no	-0.223377	0.635881	down	no	SGT1 and CS domain protein
AFLA_006880	45.992	28.5476	32.1068	-0.721921	0.373	down	no	-0.550778	0.0918631	down	no	PQ loop repeat protein
AFLA_006890	40.5165	56.8628	55.3061	0.423842	0.740565	up	no	0.366352	0.427571	up	no	SIR2 family histone deacetylase, putative
AFLA_006900	49.6628	54.187	60.0707	0.106645	0.981334	up	no	0.240508	0.539443	up	no	cyclin-dependent protein kinase PhoA
AFLA_006910	5.79919	3.04024	1.70855	-0.954043	0.727315	down	no	-1.74692	0.0921037	down	no	hypothetical protein
AFLA_006920	2.89976	1.70387	1.78834	-0.769602	0.56865	down	no	-0.680647	0.338577	down	no	cAMP receptor-like protein, putative
AFLA_006930	14.1737	19.6981	21.4412	0.469863	0.737778	up	no	0.587081	0.268841	up	no	MIND kinetochore complex component Nnf1, putative
AFLA_006940	33.0241	20.7771	19.7606	-0.679444	0.398664	down	no	-0.7529	0.0138584	down	no	conserved hypothetical protein
AFLA_006950	130.179	79.7862	80.0247	-0.761776	0.480045	down	no	-0.737178	0.00224954	down	no	NTF2 and RRM domain protein
AFLA_006960	1728.44	795.851	1156.97	-1.23172	0.429342	down	no	-0.665209	0.0162837	down	no	molecular chaperone and allergen Mod-E/Hsp90/Hsp1
AFLA_006970	61.083	54.3144	69.7275	-0.219243	0.894396	down	no	0.142225	0.755217	up	no	conserved hypothetical protein
AFLA_006980	56.3488	51.0063	53.7322	-0.164363	0.922255	down	no	-0.0903758	0.846357	down	no	HLH transcription factor (PalcA), putative
AFLA_006990	60.4915	25.4953	25.4554	-1.26238	0.102019	down	no	-1.24392	9.9e-08	down	yes	DNA directed RNA polymerase III subunit Rpc82, putative
AFLA_007000	320.963	394.711	325.279	0.293919	0.83493	up	no	-0.00713321	1	down	no	ubiquinol-cytochrome C reductase complex core protein 2, putative
AFLA_007010	243.427	300.28	274.855	0.27158	0.832313	up	no	0.118018	0.758088	up	no	mitochondrial DNA replication protein (Yhm2), putative
AFLA_007020	771.763	770.636	466.607	-0.034741	1	down	no	-0.776874	0.00122128	down	no	citrate synthase (Cit1), putative
AFLA_007030	137.653	93.2115	76.7934	-0.650214	0.696575	down	no	-0.89674	6.96e-05	down	no	RNA binding protein Nrd1, putative
AFLA_007040	134.863	137.227	251.987	-0.0209562	1	down	no	0.850901	0.00187677	up	no	homocysteine synthase CysD
AFLA_007050	171.009	161.216	103.69	-0.13731	0.987296	down	no	-0.784046	0.000760445	down	no	conserved hypothetical protein
AFLA_007060	110.301	114.838	104.606	0.0589342	1	up	no	-0.0880725	0.831932	down	no	arginine transporter, putative
AFLA_007070	125.505	155.593	112.944	0.321704	0.810772	up	no	-0.159305	0.782345	down	no	AMP-binding enzyme, putative
AFLA_007080	80.9255	70.7895	69.8905	-0.218327	0.91244	down	no	-0.253399	0.468027	down	no	conserved hypothetical protein
AFLA_007090	102.539	251.496	224.173	1.26723	0.0372926	up	yes	1.06568	0.00010841	up	yes	WW domain protein, putative
AFLA_007100	12.3769	11.5086	10.8317	-0.0895015	0.961723	down	no	-0.166263	0.656736	down	no	WD repeat protein
AFLA_007110	332.045	246.889	185.516	-0.47093	0.645593	down	no	-0.877226	0.0651679	down	no	peroxisomal membrane protein Pmp47, putative
AFLA_007120	336.653	451.777	386.349	0.404216	0.715935	up	no	0.154145	0.720178	up	no	secretion related GTPase SrgB/Ypt1
AFLA_007130	0	0.36834	0	Inf	0.848568	up	no					hypothetical protein
AFLA_007140	49.2549	44.9273	87.6489	-0.159784	0.948994	down	no	0.792734	0.00358354	up	no	aminopeptidase, putative
AFLA_007150	51.5349	37.41	46.0913	-0.480355	0.716223	down	no	-0.20083	0.765057	down	no	RNA polymerase TFIIH complex subunit Ssl1, putative
AFLA_007160	30.2959	20.41	20.7512	-0.592553	0.62621	down	no	-0.576835	0.32515	down	no	hypothetical protein
AFLA_007170	1.11977	1.01209	0.580574	-0.144575	1	down	no	-0.952246	0.170712	down	no	Pumilio-family RNA binding repeat domain protein
AFLA_007180	41.0941	40.2794	42.8369	-0.013925	1	down	no	0.0565331	0.982019	up	no	ER to Golgi transport protein (Sly41), putative
AFLA_007190	154.596	191.489	153.689	0.300935	0.829782	up	no	-0.041657	0.960997	down	no	NADH-ubiquinone oxidoreductase, subunit G, putative
AFLA_007200	82.6864	95.1394	88.5397	0.168551	0.880962	up	no	0.0301173	0.969478	up	no	conserved hypothetical protein
AFLA_007210	28.1869	20.9886	25.0593	-0.444662	0.637242	down	no	-0.18816	0.629957	down	no	cytokinesis regulator (Byr4), putative
AFLA_007220	33.1155	29.7201	29.1336	-0.162155	0.930482	down	no	-0.187218	0.760854	down	no	conserved hypothetical protein
AFLA_007230	56.131	55.627	69.1683	0.0352483	1	up	no	0.333945	0.517084	up	no	er lumen protein retaining receptor, putative
AFLA_007240	288.285	213.788	246.625	-0.414583	0.73405	down	no	-0.239357	0.458607	down	no	mitochondrial 37S ribosomal protein S27, putative
AFLA_007250	24.1593	21.7122	24.1002	-0.133654	0.967843	down	no	-0.00433193	1	down	no	nucleolar RNAse III, putative
AFLA_007350	4.0296	4.42561	1.56259	0.042527	1	up	no	-1.45694	0.210125	down	no	hypothetical protein
AFLA_007360	0.660155	2.15119	2.77248	1.59785	0.227313	up	no	1.98484	0.0133179	up	yes	hypothetical protein
AFLA_007370	0.989467	0.801433	0.615323	-0.26024	0.938898	down	no	-0.65963	0.434736	down	no	conserved hypothetical protein
AFLA_007380	0.043086	0	0	#NAME?	0.863822	down	no	#NAME?	0.71005	down	no	conserved hypothetical protein
AFLA_007390	0.0830673	0.320672	0.0950323	1.93933	0.43972	up	no	0.147779	1	up	no	zeaxanthin epoxidase, putative
AFLA_007400	0.167514	0.339955	0.0641888	0.841205	0.938079	up	no	-1.61597	0.839696	down	no	conserved hypothetical protein
AFLA_007420	0.2246	0.285124	0.268752	0.309405	1	up	no	0.115922	0.950213	up	no	hypothetical protein
AFLA_007430	8.7046	11.6742	11.8344	0.365985	0.803478	up	no	0.344252	0.672333	up	no	conserved hypothetical protein
AFLA_007440	10.952	7.20047	6.84777	-0.624047	0.58179	down	no	-0.708778	0.351241	down	no	conserved hypothetical protein
AFLA_007450	57.3779	59.6862	33.804	0.00725668	1	up	no	-0.836843	0.060621	down	no	O-methyltransferase, putative
AFLA_007460	82.2774	63.1167	43.9431	-0.35506	0.758745	down	no	-0.903151	0.000203668	down	no	cytochrome P450, putative
AFLA_007470	97.7538	151.968	95.8097	0.592947	0.469083	up	no	-0.0939941	0.952269	down	no	cytochrome P450, putative
AFLA_007480	1.14545	2.92456	1.444	1.34939	0.137148	up	no	0.289614	0.764573	up	no	conserved hypothetical protein
AFLA_007490	1.07459	0.89536	0.746723	-0.313953	1	down	no	-0.640653	0.656429	down	no	4-hydroxyphenylpyruvate dioxygenase, putative
AFLA_007500	1.63305	0.916694	0.86964	-0.840032	0.630192	down	no	-0.944529	0.464149	down	no	conserved hypothetical protein
AFLA_007510	2.75699	2.16015	1.26171	-0.363726	0.90455	down	no	-1.17445	0.331525	down	no	2-hydroxyhepta-2,4-diene-1,7-dioate isomerase, putative
AFLA_007520	1.04819	0.257255	0.0907588	-1.98807	0.418201	down	no	-3.55464	0.100392	down	no	conserved hypothetical protein
AFLA_007530	147.568	53.3965	43.3046	-1.52917	0.2618	down	no	-1.87561	0.0386033	down	yes	conserved hypothetical protein
AFLA_007540	44.0736	81.4453	77.346	0.841892	0.284096	up	no	0.733597	0.0325854	up	no	glutathione S-transferase, putative
AFLA_007550	0.268654	0.54641	0.296738	1.13882	0.994558	up	no	0.223571	1	up	no	hypothetical protein
AFLA_007560	0.832703	0.745025	1.1492	-0.236311	0.990487	down	no	0.39134	0.685873	up	no	F5/8 type C domain protein
AFLA_007570	0.184455	0.0409004	0	-2.25797	0.634629	down	no	#NAME?	0.165468	down	no	conserved hypothetical protein
AFLA_007580	2.16549	1.55831	0.860069	-0.60698	0.728796	down	no	-1.44296	0.0245891	down	yes	MFS sugar transporter, putative
AFLA_007590	1.41424	0.752169	1.00878	-1.12316	0.971531	down	no	-0.611539	0.860007	down	no	hypothetical protein
AFLA_007600	17.0308	35.4316	7.61271	0.993373	0.607903	up	no	-1.15788	0.262803	down	no	oligopeptide transporter, putative
AFLA_007610	0.588757	4.13055	4.47128	2.8001	0.000134298	up	yes	2.91698	1.96e-06	up	yes	conserved hypothetical protein
AFLA_007620	48.5901	49.4935	40.3648	-0.033526	1	down	no	-0.375831	0.849712	down	no	GNAT family N-acetyltransferase, putative
AFLA_007630	7.06078	10.8788	5.16457	0.627786	0.586697	up	no	-0.471721	0.508788	down	no	integral membrane protein, Mpv17/PMP22 family, putative
AFLA_007640	193.162	350.665	197.885	0.880802	0.306412	up	no	0.0353211	1	up	no	conserved hypothetical protein
AFLA_007650	24.4348	26.656	16.3457	0.00470632	1	up	no	-0.665404	0.354861	down	no	conserved hypothetical protein
AFLA_007660	12.3599	13.6247	6.62294	0.0805027	1	up	no	-0.937974	0.0234548	down	no	conserved hypothetical protein
AFLA_007670	5.10842	6.47095	1.03116	0.169655	0.946855	up	no	-2.41414	2.7e-06	down	yes	sugar transporter, putative
AFLA_007680	6.15166	6.78071	1.17248	-0.0334978	1	down	no	-2.50021	8.97e-07	down	yes	argininosuccinate lyase, putative
AFLA_007690	7.11102	1.98872	21.8463	-1.85212	0.114995	down	no	1.55509	0.0322663	up	yes	conserved hypothetical protein
AFLA_007700	103.754	199.48	79.6246	0.915564	0.337751	up	no	-0.454513	0.606373	down	no	conserved hypothetical protein
AFLA_007710	0.948284	0.658958	0.726863	-0.564394	0.923589	down	no	-0.442738	0.947838	down	no	conserved hypothetical protein
AFLA_007720	1.53663	3.4348	4.04916	1.18543	0.266144	up	no	1.36821	0.0192476	up	yes	pectin lyase
AFLA_007730	0.916109	0.626508	0.243323	-0.60109	0.842205	down	no	-1.99912	0.0261592	down	yes	conserved hypothetical protein
AFLA_007740	1.0975	1.8192	3.53941	0.648405	0.885773	up	no	1.63503	0.0987195	up	no	heat shock protein Hsp20/Hsp26, putative
AFLA_007750	3.05408	4.10448	1.54346	0.406894	0.919832	up	no	-0.959764	0.292631	down	no	hypothetical protein
AFLA_007760	326.437	290.786	183.576	-0.266988	0.889315	down	no	-0.936447	0.00168053	down	no	flavin-binding monooxygenase-like protein
AFLA_007770	25.6932	22.9598	20.2447	-0.185008	0.929296	down	no	-0.3732	0.272662	down	no	conserved hypothetical protein
AFLA_007780	21.6777	42.9018	31.7489	0.939333	0.152859	up	no	0.48191	0.192342	up	no	FAD binding domain protein
AFLA_007790	2.73273	3.01572	2.69588	0.143992	0.973091	up	no	-0.0387609	0.983809	down	no	MFS transporter of unkown specificity
AFLA_007800	45.8947	76.3376	60.9924	0.723117	0.362014	up	no	0.39086	0.254493	up	no	conserved hypothetical protein
AFLA_007810	34.8567	21.0082	3.55874	-0.827553	0.447448	down	no	-3.40176	1.82e-24	down	yes	gibberellin 20-oxidase family protein
AFLA_007820	10.947	8.15477	2.76844	-0.487326	0.778188	down	no	-2.04908	0.00106985	down	yes	hypothetical protein
AFLA_007830	13.5773	12.0306	3.31338	-0.262862	0.915275	down	no	-2.12003	7.34e-06	down	yes	conserved hypothetical protein
AFLA_007840	25.2087	13.8892	5.12941	-0.917111	0.238392	down	no	-2.36707	2.21e-06	down	yes	cysteine desulfurylase, putative
AFLA_007850	10.1459	5.72389	2.99512	-0.882282	0.302938	down	no	-1.82153	0.000447437	down	yes	conserved hypothetical protein
AFLA_007860	91.4283	44.9628	17.2354	-1.06679	0.0990346	down	no	-2.44782	1.52e-10	down	yes	oligopeptide transporter, putative
AFLA_007870	7.84936	4.24988	1.99093	-0.953122	0.316574	down	no	-2.04601	3.73e-06	down	yes	phosphatidylserine decarboxylase, putative
AFLA_007880	0.0821423	0.0851634	0.355238	0.155451	1	up	no	2.17288	0.635416	up	no	conserved hypothetical protein
AFLA_007890	24.5993	46.2926	47.9282	0.916141	0.166848	up	no	0.935126	0.001553	up	no	5'-nucleotidase, putative
AFLA_007900	34.3622	41.2182	32.5756	0.289052	0.918847	up	no	-0.0543021	0.903643	down	no	5-oxo-L-prolinase, putative
AFLA_007910	15.9603	10.9072	14.4954	-0.608923	0.63212	down	no	-0.214961	0.751693	down	no	cytochrome P450 monooxygenase, putative
AFLA_007920	10.6335	6.95743	8.63051	-0.657113	0.522496	down	no	-0.363344	0.444752	down	no	C6 transcription factor, putative
AFLA_007930	1.85148	1.82347	2.27119	-0.0946695	1	down	no	0.204768	0.775672	up	no	conserved hypothetical protein
AFLA_007940	1.58216	1.17588	1.15609	-0.457875	0.80637	down	no	-0.473225	0.566906	down	no	HET domain protein
AFLA_007950	2.1376	2.19155	3.68207	-0.0155422	1	down	no	0.716753	0.321221	up	no	conserved hypothetical protein
AFLA_007960	3.46294	7.8166	5.83514	1.14578	0.274846	up	no	0.693172	0.407949	up	no	conserved hypothetical protein
AFLA_007970	18.1805	15.1888	12.479	-0.31663	0.881248	down	no	-0.623935	0.178059	down	no	3-hydroxyacyl-CoA dehydrogenase, putative
AFLA_007980	0.234911	0.0677038	0.185213	-1.80587	0.7312	down	no	-0.401398	0.962793	down	no	NAD dependent epimerase/dehydratase, putative
AFLA_007990	6.11981	5.04809	7.28053	-0.249439	0.92393	down	no	0.265298	0.81745	up	no	conserved hypothetical protein
AFLA_008000	0	0.0508246	0	Inf	1	up	no					conserved hypothetical protein
AFLA_008010	1.64964	0.657478	2.05585	-1.35907	0.2787	down	no	0.286016	0.751873	up	no	alpha-L-rhamnosidase family protein
AFLA_008020	0.4737	0.351008	0.0712019	-0.417525	0.989381	down	no	-2.72407	0.301844	down	no	quinate dehydrogenase, putative
AFLA_008030	0.694563	0.279627	0.702366	-1.39625	0.718714	down	no	-0.0100021	1	down	no	3-dehydroquinate dehydratase, type II
AFLA_008040	4.21864	5.71973	8.58216	0.364151	0.812586	up	no	0.971624	0.0386315	up	no	pentafunctional AROM polypeptide, putative
AFLA_008050	1.41905	2.47504	2.86815	0.756935	0.500985	up	no	0.979098	0.0964909	up	no	conserved hypothetical protein
AFLA_008060	1.83574	2.80113	2.7304	0.565704	0.70916	up	no	0.525168	0.514868	up	no	4-hydroxyphenylpyruvate dioxygenase, putative
AFLA_008070	0.575889	0.543734	1.3616	-0.162951	1	down	no	1.16314	0.255033	up	no	shikimate 5-dehydrogenase, putative
AFLA_008080	56.1645	88.3798	172.742	0.658546	0.418857	up	no	1.59737	1.3e-06	up	yes	hypothetical protein
AFLA_008090	2.46559	2.28564	3.73179	-0.0829205	1	down	no	0.595776	0.617477	up	no	hypothetical protein
AFLA_008100	4.17275	7.4044	5.60469	0.814339	0.399715	up	no	0.369722	0.629957	up	no	conserved hypothetical protein
AFLA_008110	1.11735	1.92651	0.489867	0.792295	0.692227	up	no	-1.19331	0.232805	down	no	extracellular endo-1,4-beta-xylanase, putative
AFLA_008120	13.0996	21.3606	9.90119	0.747478	0.444677	up	no	-0.401295	0.296638	down	no	conserved hypothetical protein
AFLA_008130	31.8878	28.0603	17.7529	-0.188794	0.928626	down	no	-0.867568	0.00302834	down	no	MFS transporter, putative
AFLA_008140	0.497418	0.37298	0.610352	-0.438995	1	down	no	0.170805	1	up	no	conserved hypothetical protein
AFLA_008150	1.19835	1.74152	1.94506	0.46672	0.741316	up	no	0.609574	0.400112	up	no	5-oxoprolinase, putative
AFLA_008160	0.60773	0.487862	0.741684	-0.270815	1	down	no	0.268503	0.932628	up	no	conserved hypothetical protein
AFLA_008170	0.644232	0.302019	0.30929	-1.1523	0.768926	down	no	-1.14119	0.856523	down	no	conserved hypothetical protein
AFLA_008180	20.1537	25.6819	15.8058	0.266478	0.901561	up	no	-0.44699	0.262923	down	no	heat shock trehalose synthase, putative
AFLA_008190	479.374	398.428	305.24	-0.370686	0.839552	down	no	-0.772113	0.00131037	down	no	conserved hypothetical protein
AFLA_008200	2.79334	4.457	2.05072	0.590111	0.652975	up	no	-0.516754	0.524945	down	no	hypothetical protein
AFLA_008210	3.79756	5.75228	3.03249	0.497199	0.833888	up	no	-0.432196	0.527864	down	no	NF-X1 finger and helicase domain protein, putative
AFLA_008220	2.09027	2.39472	0.816964	0.0979752	0.991398	up	no	-1.42208	0.0204372	down	yes	conserved hypothetical protein
AFLA_008230	0.745162	0.512513	1.06739	-0.507412	0.956517	down	no	0.517735	0.892773	up	no	srpk, putative
AFLA_008240	82.3794	127.006	114.598	0.638672	0.42894	up	no	0.457172	0.207951	up	no	calcium sensor (NCS-1), putative
AFLA_008250	30.3886	36.8615	30.1185	0.295724	0.846994	up	no	-0.00865825	0.994833	down	no	endosomal integral membrane protein (P24a), putative
AFLA_008260	54.2431	53.4398	41.5058	-0.00840998	1	down	no	-0.378214	0.463093	down	no	hypothetical protein
AFLA_008270	89.5472	36.5962	36.028	-1.29549	0.0617706	down	no	-1.30362	7.15e-08	down	yes	U3 small nucleolar ribonucleoprotein protein LCP5, putative
AFLA_008280	10.8048	9.61006	13.4208	-0.168572	1	down	no	0.291704	0.801497	up	no	hypothetical protein
AFLA_008290	30.9734	41.2506	41.3466	0.423396	0.693884	up	no	0.407398	0.23396	up	no	kinesin family protein (KinA), putative
AFLA_008300	199	395.67	439.37	0.980016	0.12745	up	no	1.10286	6.13e-05	up	yes	ubiquitin conjugating enzyme (UbcB), putative
AFLA_008310	82.688	74.4671	66.7787	-0.144699	0.952128	down	no	-0.319195	0.288118	down	no	acetyl-CoA-acetyltransferase, putative
AFLA_008320	5.28301	4.68715	4.67713	-0.161102	0.934113	down	no	-0.160266	0.827068	down	no	conserved hypothetical protein
AFLA_008330	13.017	13.4943	14.9182	0.0624449	1	up	no	0.189906	0.783479	up	no	beta-1,4-mannosyltransferase (Alg1), putative
AFLA_008340	14.0441	21.5971	15.6352	0.644381	0.582581	up	no	0.172961	0.894332	up	no	CDF zinc transporter (Msc2), putative
AFLA_008350	4.62481	3.58045	2.48284	-0.416108	0.798146	down	no	-0.952737	0.0593282	down	no	amine oxidase
AFLA_008360	3.09044	2.45895	3.21615	-0.304796	0.931859	down	no	0.0545573	1	up	no	conserved hypothetical protein
AFLA_008370	18.7867	15.7757	21.9949	-0.25479	0.875454	down	no	0.200606	0.808103	up	no	RTA1 domain protein, putative
AFLA_008380	80.1549	112.149	113.742	0.473375	0.636948	up	no	0.483329	0.19256	up	no	ubiquitin conjugating enzyme, putative
AFLA_008390	120.208	149.771	134.346	0.306173	0.81262	up	no	0.130636	0.752782	up	no	conserved hypothetical protein
AFLA_008400	3.73385	9.82638	3.35096	1.24822	0.394164	up	no	-0.245022	0.886473	down	no	hypothetical protein
AFLA_008410	96.3978	108.111	70.1341	-0.0147401	1	down	no	-0.603002	0.376319	down	no	MFS multidrug transporter, putative
AFLA_008420	4.06456	4.15141	3.64639	-0.0590241	1	down	no	-0.193004	0.938342	down	no	hypothetical protein
AFLA_008430	2.18421	1.65636	1.28121	-0.397338	0.876471	down	no	-0.791586	0.304304	down	no	sugar transporter, putative
AFLA_008440	23.1756	29.0974	21.5761	0.228685	0.937045	up	no	-0.183503	0.782287	down	no	conserved hypothetical protein
AFLA_008450	604.914	961.406	783.101	0.685626	0.538532	up	no	0.34072	0.368007	up	no	conserved hypothetical protein
AFLA_008460	147.961	209.837	245.237	0.428703	0.772244	up	no	0.624316	0.136474	up	no	conserved hypothetical protein
AFLA_008470	1.95078	3.95024	1.56433	1.04775	0.58839	up	no	-0.327364	0.959702	down	no	hypothetical protein
AFLA_008480	364.479	810.426	309.378	1.07381	0.407072	up	no	-0.33957	0.218231	down	no	CFEM domain protein
AFLA_008490	92.2096	98.0477	61.1997	0.116369	0.988058	up	no	-0.585614	0.0503826	down	no	mitochondrial carnitine:acyl carnitine carrier, putative
AFLA_008500	24.3957	28.6023	23.2357	0.224521	0.863822	up	no	-0.107499	0.856089	down	no	conserved hypothetical protein
AFLA_008510	3.35522	3.23953	9.86861	-0.116782	1	down	no	1.45261	0.0705094	up	no	hypothetical protein
AFLA_008520	5.88315	5.29275	2.77766	-0.283109	1	down	no	-1.16611	0.0279977	down	yes	alpha-amylase, putative
AFLA_008530	7.45895	6.20351	6.47623	-0.293856	0.848568	down	no	-0.221728	0.687966	down	no	conserved hypothetical protein
AFLA_008550	10.5851	6.64482	9.34122	-0.706436	0.630192	down	no	-0.179755	0.800635	down	no	hypothetical protein
AFLA_008560	4.37433	3.02085	3.18175	-0.604854	0.670886	down	no	-0.54468	0.353321	down	no	alpha-1,2-mannosidase, putative subfamily
AFLA_008570	2.58375	3.05965	3.95726	0.242861	0.911804	up	no	0.59901	0.32515	up	no	conserved hypothetical protein
AFLA_008580	4.54146	2.26318	2.16885	-1.01401	0.616217	down	no	-1.08636	0.460854	down	no	hypothetical protein
AFLA_008590	2.39079	1.93809	1.73909	-0.312812	0.889416	down	no	-0.466814	0.511005	down	no	conserved hypothetical protein
AFLA_008600	19.9724	8.21213	53.4267	-1.36386	0.116024	down	no	1.33025	0.000689526	up	yes	conserved hypothetical protein
AFLA_008610	1.60122	1.82656	1.43588	0.159779	1	up	no	-0.141298	1	down	no	hypothetical protein
AFLA_008620	24.3043	31.7388	17.8328	0.150194	1	up	no	-0.618582	0.0610904	down	no	ankyrin repeat-containing protein, putative
AFLA_008630	577.901	376.45	288.09	-0.791862	0.856823	down	no	-1.12644	0.140021	down	no	hypothetical protein
AFLA_008640	23.195	30.7606	33.3428	0.414746	0.758745	up	no	0.524664	0.138663	up	no	ferric-chelate reductase, putative
AFLA_008650	1.88012	2.76344	1.37996	0.456371	0.896186	up	no	-0.481474	0.702826	down	no	short-chain dehydrogenases/reductase, putative
AFLA_008660	0.513788	1.84975	2.02095	1.82009	0.241705	up	no	1.91426	0.052574	up	no	hypothetical protein
AFLA_008670	1.6323	1.23688	0.898223	-0.500062	0.848568	down	no	-0.938811	0.353704	down	no	conserved hypothetical protein
AFLA_008680	0	0.0968468	0	Inf	0.665788	up	no					conserved hypothetical protein
AFLA_008690	83.1338	103.011	47.3151	0.233088	0.911375	up	no	-0.891959	0.123348	down	no	conserved hypothetical protein
AFLA_008700	0	0.301911	0.050165	Inf	0.377189	up	no	Inf	1	up	no	monooxygenase, putative
AFLA_008710	0	0	0.0983668					Inf	1	up	no	monooxygenase, putative
AFLA_008720	20.383	27.5255	20.5351	0.438951	0.671528	up	no	-0.0196849	1	down	no	conserved hypothetical protein
AFLA_008730	2.56661	2.52257	2.03434	-0.0117356	1	down	no	-0.3159	0.791954	down	no	hypothetical protein
AFLA_008740	2.36668	1.98634	1.14567	-0.318261	0.963461	down	no	-1.14841	0.318178	down	no	oxidoreductase, short chain dehydrogenase/reductase family
AFLA_008750	7.35132	7.06284	29.2946	-0.064945	1	down	no	1.95943	0.00423681	up	yes	hypothetical protein
AFLA_008760	0.467554	0.403668	0.408058	-0.257029	0.940939	down	no	-0.232092	0.839723	down	no	multidrug resistance protein, putative
AFLA_008770	0.035418	0.0315129	0.0853848	-0.230108	1	down	no	1.19629	0.180013	up	no	nonribosomal peptide synthase, putative
AFLA_008780	0.355144	0.0901812	0.151128	-2.00628	0.306412	down	no	-1.32383	0.541499	down	no	asparagine synthetase, putative
AFLA_008790	0.294738	0.162506	0.480257	-1.03602	0.889416	down	no	0.481211	0.900089	up	no	conserved hypothetical protein
AFLA_008800	0.0826906	0.0822063	0.238091	0.124408	1	up	no	1.59068	0.818631	up	no	conserved hypothetical protein
AFLA_008820	29.7978	26.5616	29.0158	-0.163008	0.98734	down	no	-0.0685471	0.983706	down	no	conserved hypothetical protein
AFLA_008830	15.7345	22.3861	21.401	0.507196	0.610427	up	no	0.432065	0.242925	up	no	GTPase activating protein (Evi5), putative
AFLA_008840	31.4494	27.3639	20.5356	-0.201423	0.867361	down	no	-0.612696	0.0131052	down	no	DNA topoisomerase II
AFLA_008850	1.9508	25.3751	18.824	3.71216	4.64e-13	up	yes	3.27258	1.47e-15	up	yes	conserved hypothetical protein
AFLA_008860	1.08877	1.3041	2.51078	0.252625	0.992355	up	no	1.19508	0.146485	up	no	conserved hypothetical protein
AFLA_008870	5.32229	5.76078	11.8534	0.0842861	1	up	no	1.0822	0.10781	up	no	hypothetical protein
AFLA_008880	94.6086	29.2009	35.0361	-1.60715	0.322367	down	no	-1.40788	0.0948966	down	no	zinc-containing alcohol dehydrogenase, putative
AFLA_008890	355.268	833.19	1301.75	1.17489	0.160769	up	no	1.79269	1.08e-08	up	yes	glutamate decarboxylase
AFLA_008900	4.75875	10.8425	12.0717	1.13186	0.259267	up	no	1.26494	0.0223502	up	yes	conserved hypothetical protein
AFLA_008910	39.3427	79.5457	44.471	0.984417	0.111151	up	no	0.117565	0.788907	up	no	conserved hypothetical protein
AFLA_008920	437.918	432.873	310.053	-0.0767029	1	down	no	-0.579112	0.0311647	down	no	conserved hypothetical protein
AFLA_008930	1.28873	1.65588	4.33991	0.364047	0.874658	up	no	1.74231	0.00122128	up	yes	acid phosphatase AphA
AFLA_008950	0	0	0.0295991					Inf	1	up	no	aminotransferase, classes I and II family, putative
AFLA_008960	54.8795	13.6987	21.8496	-2.14984	0.165753	down	no	-1.45091	0.0264671	down	yes	TPR domain protein
AFLA_008970	5.42401	6.15112	10.203	0.159478	0.943094	up	no	0.862399	0.0687042	up	no	SAM dependent methyltransferase, putative
AFLA_008980	92.2965	57.1505	60.1574	-0.723441	0.331539	down	no	-0.640022	0.01683	down	no	UPF0023 family protein
AFLA_008990	184.9	308.028	316.183	0.716169	0.373538	up	no	0.723781	0.00830332	up	no	carboxypeptidase CpyA/Prc1, putative
AFLA_009000	2381.64	988.368	1286.04	-1.26183	0.0942141	down	no	-0.888312	0.000133795	down	no	ribosomal protein S13p/S18e
AFLA_009010	0.607363	0.917224	0.712025	0.598289	0.698171	up	no	0.209042	0.885372	up	no	conserved hypothetical protein
AFLA_009020	207.439	167.946	129.146	-0.291338	0.846969	down	no	-0.653127	0.467064	down	no	cytochrome c peroxidase, putative
AFLA_009030	14.5336	14.3322	7.63391	-0.0592679	1	down	no	-0.967391	0.0690944	down	no	conserved hypothetical protein
AFLA_009040	2.17771	2.64447	1.43662	0.198754	0.961503	up	no	-0.624734	0.404864	down	no	3-isopropylmalate dehydrogenase
AFLA_009050	41.8615	23.8134	27.1072	-0.810822	0.277413	down	no	-0.617868	0.0423428	down	no	TPR repeat protein
AFLA_009060	3.04575	2.35116	0.77224	-0.400468	0.920955	down	no	-1.9483	0.00338259	down	yes	endo-1,4-beta-xylanase, putative
AFLA_009070	6.06301	3.55017	2.65872	-0.874335	0.56865	down	no	-1.26207	0.00756132	down	yes	conserved hypothetical protein
AFLA_009080	56.8998	45.4345	34.9577	-0.373589	0.768502	down	no	-0.757358	0.00958733	down	no	conserved hypothetical protein
AFLA_009090	36.3823	34.5901	27.4832	-0.0924978	0.979117	down	no	-0.421778	0.121793	down	no	nuclear serine protease HtrA2/Nma111, putative
AFLA_009100	31.9876	41.0152	32.6997	0.328309	0.78572	up	no	-0.00809276	1	down	no	pax transcription activation domain interacting protein, putative
AFLA_009110	110.879	179.72	150.388	0.655429	0.408668	up	no	0.382155	0.2157	up	no	cwl1, putative
AFLA_009120	1.04262	1.15324	0.509093	0.0859796	1	up	no	-1.05807	0.174934	down	no	NRPS-like enzyme, putative
AFLA_009130	1.0871	0.728166	0.523402	-0.601105	0.866416	down	no	-1.0769	0.453903	down	no	long-chain-fatty-acid CoA ligase, putative
AFLA_009140	1.35131	1.7792	0.762284	0.39586	0.882327	up	no	-0.813651	0.32558	down	no	PKS-like enzyme, putative
AFLA_009150	0.732766	1.9865	0	1.5209	0.899561	up	no	#NAME?	0.359931	down	no	hypothetical protein
AFLA_009160	0.92723	1.0204	0.440957	0.146811	1	up	no	-1.10031	0.558749	down	no	conserved hypothetical protein
AFLA_009170	79.3602	75.6507	59.7249	-0.0543917	1	down	no	-0.403344	0.13171	down	no	HMG-CoA reductase, putative
AFLA_009180	1.11086	0.895499	0.741719	-0.234693	1	down	no	-0.544129	0.761537	down	no	conserved hypothetical protein
AFLA_009190	0.874724	0.713904	0.612316	-0.32062	1	down	no	-0.56504	0.809507	down	no	efflux pump antibiotic resistance protein, putative
AFLA_009200	6.43722	4.08723	1.74124	-0.649249	0.585049	down	no	-1.91586	3.41e-05	down	yes	conserved hypothetical protein
AFLA_009210	92.3213	87.3084	34.1617	-0.0480849	1	down	no	-1.44275	1.22e-05	down	yes	hypothetical protein
AFLA_009220	14.579	19.4123	7.90108	0.375676	0.808578	up	no	-0.962799	0.0674578	down	no	conserved hypothetical protein
AFLA_009230	1.47284	0.790742	0	-1.05922	0.953501	down	no	#NAME?	0.0370213	down	yes	hypothetical protein
AFLA_009240	38.6574	51.3212	25.4677	0.375535	0.739296	up	no	-0.675766	0.0378757	down	no	serine protein kinase, putative
AFLA_009250	1.64248	1.72209	1.10896	0.023529	1	up	no	-0.604829	0.323018	down	no	serine protein kinase, putative
AFLA_009260	0.855478	2.31067	1.57002	1.40483	0.13425	up	no	0.838837	0.253419	up	no	conserved hypothetical protein
AFLA_009270	44.5134	61.7107	101.468	0.442409	0.669775	up	no	1.1185	0.000286136	up	yes	conserved hypothetical protein
AFLA_009280	0.898253	0.554699	0.316981	-0.691545	0.680493	down	no	-1.48333	0.0584268	down	no	conserved hypothetical protein
AFLA_009290	0.18238	0.169647	0.200645	-0.129251	1	down	no	0.129999	1	up	no	AMP dependent CoA ligase, putative
AFLA_009300	0.51336	0.278893	0.133455	-0.880404	0.891089	down	no	-1.97766	0.380862	down	no	AMP dependent ligase, putative
AFLA_009310	0.73691	0.511061	1.15271	-0.554669	0.848568	down	no	0.612318	0.521688	up	no	conserved hypothetical protein
AFLA_009320	0.468897	0.118658	1.81254	-1.95598	0.52004	down	no	1.91549	0.00541671	up	yes	conserved hypothetical protein
AFLA_009330	0.296171	0.0860924	0.311992	-1.71067	0.842879	down	no	0.114204	1	up	no	conserved hypothetical protein
AFLA_009340	0.396487	0.321052	0.629461	-0.24958	1	down	no	0.666763	0.66828	up	no	developmental regulator Mod-A, putative
AFLA_009350	0.0451623	0	0	#NAME?	1	down	no	#NAME?	1	down	no	translation initiation inhibitor, putative
AFLA_009360	0.682052	0.383188	0.248598	-0.794712	0.813567	down	no	-1.44132	0.275147	down	no	serine racemase, putative
AFLA_009370	1.21575	0.691668	0.860964	-0.866683	0.842205	down	no	-0.571639	0.754727	down	no	conserved hypothetical protein
AFLA_009380	5.56531	3.36365	4.1902	-0.801388	0.609481	down	no	-0.521995	0.727436	down	no	conserved hypothetical protein
AFLA_009390	0.281671	0.0685826	0	-2.04635	0.848568	down	no	#NAME?	0.353321	down	no	hypothetical protein
AFLA_009400	1.42791	0.306294	0.256951	-2.1953	0.0990346	down	no	-2.44238	0.00492122	down	yes	conserved hypothetical protein
AFLA_009410	5.34128	2.26356	2.43528	-1.24717	0.2017	down	no	-1.14473	0.0417384	down	yes	delta(3,5)-delta(2,4)-dienoyl-CoA isomerase, mitochondrial precursor, putative
AFLA_009420	2.12232	5.09993	12.7966	1.25426	0.269746	up	no	2.54506	2.59e-07	up	yes	conserved hypothetical protein
AFLA_009430	113.964	175.712	273.381	0.65195	0.462766	up	no	1.24944	2.19e-05	up	yes	hypothetical protein
AFLA_009440	2.43837	2.30804	3.43396	-0.0949977	1	down	no	0.474765	0.650859	up	no	cytochrome B5, putative
AFLA_009460	1.07846	0.421151	0.347644	-1.40639	0.57601	down	no	-1.66001	0.255788	down	no	conserved hypothetical protein
AFLA_009470	0.545399	0.671818	0.461222	0.317673	0.968205	up	no	-0.251821	0.988608	down	no	short chain alcohol dehydrogenase, putative
AFLA_009480	3.83904	2.69345	2.55274	-0.576006	0.700067	down	no	-0.659987	0.429103	down	no	monoxygenase, putative
AFLA_009490	1.2784	2.04186	2.52624	0.646199	0.656642	up	no	0.954484	0.125718	up	no	C6 transcription factor, putative
AFLA_009500	2.6936	4.43564	3.07109	0.700602	0.657163	up	no	0.143125	0.96293	up	no	hypothetical protein
AFLA_009510	10.6205	12.9727	8.32203	0.332957	0.905168	up	no	-0.332181	0.454476	down	no	sodium/chloride dependent neurotransmitter transporter, putative
AFLA_009520	2.98367	16.1477	37.1135	2.46644	0.00222431	up	yes	3.61304	9.42e-14	up	yes	conserved hypothetical protein
AFLA_009530	0.0138581	0.00701702	0.0328174	-1.01289	1	down	no	1.10736	0.684309	up	no	hypothetical protein
AFLA_009540	0.0709179	0.383671	1.67512	2.45384	0.698926	up	no	4.6255	0.0187193	up	yes	conserved hypothetical protein
AFLA_009550	0.112639	0.215087	0.111188	0.961994	0.82667	up	no	-0.0524667	1	down	no	xylosidase/arabinosidase, putative
AFLA_009560	0.0215624	0.0579679	0.138221	1.09662	0.997238	up	no	2.42918	0.388462	up	no	hexose transporter, putative
AFLA_009570	0.252153	0.0902527	0.137889	-1.5151	0.574412	down	no	-0.897084	0.630628	down	no	conserved hypothetical protein
AFLA_009580	5.76615	3.34484	2.60376	-0.813971	0.624416	down	no	-1.19346	0.0974301	down	no	C6 transcription factor, putative
AFLA_009590	0.245826	0.144549	0.0324597	-0.812881	0.892312	down	no	-2.90188	0.213873	down	no	UPF0075 domain protein
AFLA_009600	1.3034	0.461469	0.081416	-1.4479	0.274816	down	no	-4.01327	0.0715444	down	no	MFS sugar transporter, putative
AFLA_009610	0.543276	0.626865	0.766517	0.148293	1	up	no	0.475051	0.936281	up	no	hypothetical protein
AFLA_009620	0.213916	0.765962	0.527385	1.79901	0.628339	up	no	1.17138	0.707547	up	no	hypothetical protein
AFLA_009630	3.31932	7.64315	3.24051	1.18816	0.113575	up	no	-0.0941344	0.940598	down	no	ankyrin repeat-containing protein, putative
AFLA_009640	0.143672	0.193348	0.379001	0.164636	1	up	no	1.21627	0.641164	up	no	conserved hypothetical protein
AFLA_009650	0	0	0.0667023					Inf	1	up	no	hypothetical protein
AFLA_009670	0.14354	0	0	#NAME?	0.584098	down	no	#NAME?	0.353251	down	no	aldehyde reductase (GliO), putative
AFLA_009680	0.259688	0.419633	0.383254	0.637096	0.829782	up	no	0.509067	0.731114	up	no	monooxygenase, putative
AFLA_009690	8.52241	4.03915	4.19975	-1.14591	0.254149	down	no	-1.10611	0.0224109	down	yes	conserved hypothetical protein
AFLA_009700	0.0630024	0.101029	0.0346105	0.77101	1	up	no	-0.779006	0.997307	down	no	alcohol dehydrogenase, putative
AFLA_009710	1.84987	2.06957	2.27175	0.144595	1	up	no	0.267137	0.854458	up	no	conserved hypothetical protein
AFLA_009720	3.92434	1.18092	1.52977	-1.67196	0.167248	down	no	-1.32965	0.19256	down	no	conserved hypothetical protein
AFLA_009730	1.99568	1.8497	1.72354	-0.102043	1	down	no	-0.211408	0.811989	down	no	hypothetical protein
AFLA_009740	0.949452	0.57823	0.0817674	-0.766506	0.957661	down	no	-3.48805	0.0468683	down	yes	hypothetical protein
AFLA_009750	11.7295	1.49304	0.975216	-2.95865	0.0132362	down	yes	-3.5507	2.63e-16	down	yes	sugar transporter, putative
AFLA_009760	0.310205	0.413021	0	0.379903	1	up	no	#NAME?	0.514912	down	no	conserved hypothetical protein
AFLA_009770	0.313354	0.149799	0	-0.909051	1	down	no	#NAME?	0.709707	down	no	hypothetical protein
AFLA_009780	53.1328	3.38866	1.3686	-3.94599	0.0344399	down	yes	-5.23106	7.91e-20	down	yes	hypothetical protein
AFLA_009790	1.81299	0.791697	0.42934	-1.27641	0.393577	down	no	-2.12656	0.000972749	down	yes	conserved hypothetical protein
AFLA_009800	1.31116	0.242276	0.432358	-2.48029	0.0375171	down	yes	-1.62823	0.190588	down	no	conserved hypothetical protein
AFLA_009810	0.404436	0	0.0758396	#NAME?	0.487153	down	no	-2.38591	0.521688	down	no	hypothetical protein
AFLA_009820	0	0.0224199	0	Inf	1	up	no					feruloyl esterase B precursor, putative
AFLA_009830	0	0	0.0200329					Inf	1	up	no	conserved hypothetical protein
AFLA_009840	0.0832689	0	0.0471452	#NAME?	0.584797	down	no	-0.834262	1	down	no	conserved hypothetical protein
AFLA_009850	0	0.118591	0	Inf	1	up	no					hypothetical protein
AFLA_009860	0.0291849	0	0	#NAME?	1	down	no	#NAME?	1	down	no	MFS transporter, putative
AFLA_009880	0	0.0494267	0	Inf	0.832354	up	no					conserved hypothetical protein
AFLA_009900	1.30569	0.876789	0.888079	-0.562453	0.719973	down	no	-0.56648	0.430417	down	no	conserved hypothetical protein
AFLA_009910	1.3835	0.935304	0.863906	-0.586218	0.815414	down	no	-0.690913	0.511843	down	no	conserved hypothetical protein
AFLA_009930	0.0386606	0.125461	0	1.78154	0.90032	up	no	#NAME?	1	down	no	diacylglycerol pyrophosphate phosphatase, putative
AFLA_009940	0.114178	0.817715	0.242799	2.86262	0.527715	up	no	1.18704	0.974826	up	no	hypothetical protein
AFLA_009950	0.863426	0.775312	0.97008	-0.208279	0.962138	down	no	0.122325	0.958417	up	no	hypothetical protein
AFLA_009960	0.460756	0.898617	0.96203	0.885001	0.792126	up	no	0.988465	0.521688	up	no	hypothetical protein
AFLA_009970	0.625878	0.322318	0.645847	-1.02302	0.863822	down	no	0.0134843	1	up	no	hypothetical protein
AFLA_009980	0.00886474	0.0265172	0	1.70695	0.870875	up	no	#NAME?	1	down	no	ABC multidrug transporter, putative
AFLA_009990	1.46132	0.90965	0.648182	-0.689966	0.756987	down	no	-1.18668	0.170862	down	no	1-aminocyclopropane-1-carboxylate oxidase, putative
AFLA_010000	1.27816	0.559917	0.516777	-1.22629	0.159968	down	no	-1.34942	0.0443335	down	yes	polyketide synthase, putative
AFLA_010010	3.69142	2.61156	1.68593	-0.503266	0.68755	down	no	-1.1658	0.00200973	down	yes	nonribosomal peptide synthase, putative
AFLA_010020	3.60869	3.04695	3.10084	-0.273407	0.877152	down	no	-0.254134	0.596107	down	no	nonribosomal peptide synthase, putative
AFLA_010030	1.07214	1.15823	0.513239	0.0309374	1	up	no	-1.12547	0.279316	down	no	oxidoreductase, 2OG-Fe(II) oxygenase family, putative
AFLA_010040	0.750276	0.680015	0.478014	-0.206204	0.999519	down	no	-0.68451	0.533841	down	no	conserved hypothetical protein
AFLA_010050	4.68825	1.77132	2.27893	-1.52602	0.201651	down	no	-1.17925	0.0652236	down	no	alcohol dehydrogenase, putative
AFLA_010060	0.733185	1.09926	0.92486	0.538614	0.852789	up	no	0.304464	0.88725	up	no	conserved hypothetical protein
AFLA_010070	0.670159	0.53079	1.38845	-0.358311	1	down	no	0.994087	0.48903	up	no	hypothetical protein
AFLA_010080	12.7654	26.9845	36.6737	1.12561	0.24686	up	no	1.54726	0.000185511	up	yes	ankyrin repeat-containing protein, putative
AFLA_010090	5.53654	5.94657	5.23629	0.0230055	1	up	no	-0.130452	0.914719	down	no	hypothetical protein
AFLA_010100	0.373242	0.881135	0	1.30527	0.613689	up	no	#NAME?	0.165468	down	no	conserved hypothetical protein
AFLA_010110	2.89591	3.58613	1.48747	0.128674	0.948092	up	no	-1.06849	0.335425	down	no	choline dehydrogenase, putative
AFLA_010120	7.2239	4.77857	4.9245	-0.649263	0.569642	down	no	-0.60244	0.291113	down	no	extracellular dioxygenase, putative
AFLA_010130	22.3669	25.284	30.0394	0.118142	0.975286	up	no	0.339787	0.46646	up	no	oxidoreductase, short-chain dehydrogenase/reductase family
AFLA_010140	5.77113	5.62274	9.35995	-0.0614028	1	down	no	0.678461	0.229521	up	no	UbiD family decarboxylase, putative
AFLA_010150	1.20965	1.28326	2.05648	0.0591059	1	up	no	0.700214	0.462161	up	no	srpk, putative
AFLA_010160	0.384111	0.183624	0.211013	-0.909051	1	down	no	-0.779006	0.997307	down	no	conserved hypothetical protein
AFLA_010170	2.30479	4.78912	12.7425	1.03198	0.296529	up	no	2.43785	3.35e-07	up	yes	tropinone reductase, putative
AFLA_010180	33.3512	41.7513	37.4966	0.262957	0.883676	up	no	0.0914769	0.979557	up	no	conserved hypothetical protein
AFLA_010190	19.6183	21.9262	29.795	0.126797	0.952498	up	no	0.553671	0.219688	up	no	ad-003, putative
AFLA_010200	2.35966	2.6317	2.34107	0.16841	0.97564	up	no	-0.0129733	1	down	no	ankyrin, putative
AFLA_010210	2.49143	2.79527	2.26404	0.17171	0.989381	up	no	-0.140146	0.85034	down	no	conserved hypothetical protein
AFLA_010220	0.316657	0.3306	0.460735	0.0314807	1	up	no	0.459744	0.850857	up	no	conserved hypothetical protein
AFLA_010230	6.05968	1.18755	1.28563	-2.41688	0.0894231	down	no	-2.24663	3.3e-05	down	yes	conserved hypothetical protein
AFLA_010240	6.37558	2.14424	0.884269	-1.59538	0.194404	down	no	-2.83907	9.8e-07	down	yes	hypothetical protein
AFLA_010250	0.125342	0.119839	0.116553	0.0909487	1	up	no	-0.0715377	1	down	no	NADH dehydrogenase, putative
AFLA_010270	0.183539	0.107217	0.0523311	-1.03131	0.916175	down	no	-2.05216	0.56603	down	no	conserved hypothetical protein
AFLA_010280	0.106708	0.110633	0	0.155451	1	up	no	#NAME?	1	down	no	hypothetical protein
AFLA_010290	0.135047	0	0.0381422	#NAME?	0.584323	down	no	-1.98856	0.640304	down	no	conserved hypothetical protein
AFLA_010300	0	0	0.0349293					Inf	1	up	no	proline-specific permease, putative
AFLA_010310	0.276852	0.172285	0.123875	-0.780433	0.964367	down	no	-1.27521	0.663461	down	no	2,4-dihydroxyhept-2-ene-1,7-dioic acid aldolase
AFLA_010320	0	0.0890757	0	Inf	0.848568	up	no					O-methyltransferase, putative
AFLA_010330	0.0691987	0.0812248	0.0367877	0.262388	1	up	no	-0.812959	1	down	no	benzoate 4-monooxygenase cytochrome P450, putative
AFLA_010340	0.117418	0.0229994	0	-2.27562	0.739077	down	no	#NAME?	0.242689	down	no	2-heptaprenyl-1,4-naphthoquinone methyltransferase, putative
AFLA_010360	0.604159	0.34908	0.556003	-0.801127	0.792126	down	no	-0.149156	1	down	no	quinone oxidoreductase, putative
AFLA_010370	0.223878	0	0	#NAME?	0.863822	down	no	#NAME?	0.71005	down	no	cytochrome B5, putative
AFLA_010380	0.118839	0.0301214	0	-1.93854	0.84784	down	no	#NAME?	0.353321	down	no	conserved hypothetical protein
AFLA_010390	0.0399694	0	0	#NAME?	1	down	no	#NAME?	1	down	no	conserved hypothetical protein
AFLA_010400	0	0.137165	0	Inf	1	up	no					hypothetical protein
AFLA_010410	0.439967	0.118611	0.0933841	-2.05634	0.739755	down	no	-2.26759	0.510149	down	no	conserved hypothetical protein
AFLA_010420	0.0984653	0.0977228	0	-0.171711	1	down	no	#NAME?	0.677803	down	no	conserved hypothetical protein
AFLA_010440	0.0309602	0.0504188	0.0505251	0.844942	0.934113	up	no	0.770278	0.894046	up	no	chitinase, putative
AFLA_010450	1.33079	1.04487	0.356158	-0.420853	0.95129	down	no	-1.97991	0.239524	down	no	hypothetical protein
AFLA_010460	1.569	0.84363	0.69861	-0.906204	0.500292	down	no	-1.21129	0.0804308	down	no	conserved hypothetical protein
AFLA_010470	0	0.3936	1.93117	Inf	0.166848	up	no	Inf	3.77e-06	up	no	O-methyltransferase, putative
AFLA_010480	0.0186565	0.164226	0.0379289	3.20592	0.348736	up	no	1.08106	1	up	no	potassium channel, putative
AFLA_010490	0.112463	0.227671	0	0.845116	1	up	no	#NAME?	1	down	no	conserved hypothetical protein
AFLA_010500	0.323195	0.13153	0	-1.30269	0.976381	down	no	#NAME?	0.242758	down	no	conserved hypothetical protein
AFLA_010510	0.148887	0	0	#NAME?	0.728257	down	no	#NAME?	0.514912	down	no	cytochrome P450, putative
AFLA_010520	0	0	0.0754033					Inf	1	up	no	conserved hypothetical protein
AFLA_010540	0	0.0792704	0	Inf	0.647289	up	no					lipase 2 precursor, putative
AFLA_010550	2.89259	0.851925	1.60969	-1.79068	0.102515	down	no	-0.926177	0.544477	down	no	O-methyltransferase family protein
AFLA_010560	2.131	0.968712	1.35735	-1.23042	0.671528	down	no	-0.790323	0.88553	down	no	hypothetical protein
AFLA_010570	163.879	23.368	12.8333	-2.9104	0.0255108	down	yes	-3.70624	3.7e-12	down	yes	hypothetical protein
AFLA_010580	32.5638	5.74615	2.14444	-2.5996	0.0876997	down	no	-3.94173	2.4e-87	down	yes	nonribosomal peptide synthase, putative
AFLA_010590	3.58386	1.74124	2.69329	-1.05048	0.523962	down	no	-0.426208	0.843806	down	no	siderophore biosynthesis lipase/esterase, putative
AFLA_010600	0	0.0252403	0.311467	Inf	1	up	no	Inf	0.0223357	up	no	siderophore biosynthesis acetylase AceI, putative
AFLA_010610	0.681421	0.300631	0.20354	-1.22585	0.620745	down	no	-1.80713	0.557241	down	no	enoyl-CoA hydratase/isomerase family protein
AFLA_010620	1.15454	1.4638	1.95674	0.29587	0.866644	up	no	0.720701	0.128974	up	no	nonribosomal siderophore peptide synthase Sid2
AFLA_010630	4.00047	3.68758	4.09725	-0.149836	0.953745	down	no	0.00400371	1	up	no	ABC multidrug transporter SidT
AFLA_010640	3.00941	1.95152	3.3448	-0.638468	0.578856	down	no	0.131924	0.911648	up	no	MFS siderophore transporter, putative
AFLA_010650	0	0.0489507	0	Inf	1	up	no					conserved hypothetical protein
AFLA_010660	0	0.0468507	0	Inf	1	up	no					hypothetical protein
AFLA_010670	0.278799	0.493423	0.0971194	0.594013	0.938079	up	no	-1.62385	0.84549	down	no	hypothetical protein
AFLA_010680	0.884426	0.564134	0.976954	-0.604351	0.853428	down	no	0.168667	0.999009	up	no	conserved hypothetical protein
AFLA_010690	0.801338	0.598184	0.564099	-0.398107	0.893896	down	no	-0.476751	0.655464	down	no	vitamin H transporter, putative
AFLA_010700	0.504217	1.30091	1.02461	1.39653	0.204509	up	no	1.0276	0.25236	up	no	conserved hypothetical protein
AFLA_010710	0.161981	0.0822063	0.175158	-0.860154	1	down	no	0.204343	1	up	no	conserved hypothetical protein
AFLA_010720	0.365472	0.224335	0.5416	-0.708196	0.962244	down	no	0.523447	0.842577	up	no	conserved hypothetical protein
AFLA_010730	3.44214	1.83529	2.63852	-0.942444	0.570681	down	no	-0.431204	0.663461	down	no	conserved hypothetical protein
AFLA_010740	49.229	60.5936	117.697	0.312445	0.835333	up	no	1.23742	0.0014094	up	yes	lysosomal protective protein precursor, putative
AFLA_010750	0.59854	0.198482	0.998982	-1.51448	0.820186	down	no	0.736666	0.736553	up	no	hypothetical protein
AFLA_010760	29.0208	21.5563	35.0723	-0.401972	0.739725	down	no	0.296275	0.506784	up	no	endoplasmic reticulum-resident kdel protein, putative
AFLA_010770	21.6323	27.3483	44.6171	0.347948	0.758413	up	no	1.02006	0.0026637	up	yes	porphobilinogen deaminase Hem3, putative
AFLA_010780	18.9342	9.64448	23.4713	-0.948894	0.269791	down	no	0.306804	0.544477	up	no	conserved hypothetical protein
AFLA_010790	32.7649	38.1973	160.487	0.161029	0.942753	up	no	2.19919	0.000880008	up	yes	elongation factor 1 gamma, putative
AFLA_010800	38.9261	17.8599	52.3195	-1.08429	0.368584	down	no	0.432184	0.487986	up	no	conserved hypothetical protein
AFLA_010810	45.7132	60.1028	57.368	0.397596	0.696302	up	no	0.297399	0.376636	up	no	conserved hypothetical protein
AFLA_010820	3.54368	2.86148	2.83255	-0.289649	0.92533	down	no	-0.31667	0.720178	down	no	hypothetical protein
AFLA_010830	0.558883	0.165572	0.240229	-1.70887	0.333611	down	no	-1.19076	0.293744	down	no	conserved hypothetical protein
AFLA_010840	0.0702567	0	0	#NAME?	0.876886	down	no	#NAME?	0.73367	down	no	conserved hypothetical protein
AFLA_010860	17.3203	12.4313	8.01551	-0.464891	0.692664	down	no	-1.12462	0.00151604	down	yes	F-box and wd40 domain protein, putative
AFLA_010870	0.13953	0.171392	0	0.305781	1	up	no	#NAME?	0.514912	down	no	endo-1,4-beta-xylanase B precursor, putative
AFLA_010880	5.09757	4.84542	3.73509	-0.0870347	1	down	no	-0.469741	0.390654	down	no	conserved hypothetical protein
AFLA_010890	485.776	279.925	477.681	-0.875532	0.3819	down	no	-0.123688	0.701109	down	no	sterol desaturase, putative
AFLA_010900	19.4506	24.7433	19.7434	0.335246	0.750491	up	no	-0.0228585	1	down	no	fatty acid desaturase, putative
AFLA_010910	764.928	1180.9	1566.87	0.612925	0.466214	up	no	0.991658	0.000292355	up	no	FKBP-type peptidyl-prolyl isomerase, putative
AFLA_010920	0.452596	0	0.339813	#NAME?	0.728781	down	no	-0.551688	1	down	no	hypothetical protein
AFLA_010930	73.1302	75.4846	118.477	0.000185924	1	up	no	0.619192	0.0498367	up	no	glutathione S-transferase family protein, putative
AFLA_010940	37.2995	51.4012	36.182	0.408241	0.685323	up	no	-0.103731	0.865938	down	no	urea hydro-lyase/cyanamide hydratase, putative
AFLA_010950	99.4832	68.3576	62.688	-0.501544	0.646402	down	no	-0.645248	0.0470262	down	no	cytochrome P450 oxidoreductase, putative
AFLA_010960	3.55242	2.63122	2.45443	-0.397463	0.831759	down	no	-0.524681	0.393575	down	no	C6 finger domain protein, putative
AFLA_010970	0.696289	0.492076	0.136448	-0.476236	0.857527	down	no	-2.31612	0.0260433	down	yes	MFS maltose permease, putative
AFLA_010980	0.676423	0.618046	0.333723	-0.0910464	1	down	no	-1.00991	0.261593	down	no	maltase MalT
AFLA_010990	2.7435	9.78214	3.08091	1.84701	0.00491057	up	yes	0.139925	0.922297	up	no	glucose-methanol-choline (gmc) oxidoreductase, putative
AFLA_011000	0.0827745	0	0.0183232	#NAME?	0.480045	down	no	-2.15986	0.510701	down	no	conserved hypothetical protein
AFLA_011010	0.902773	0.364706	0.520374	-1.31626	0.433899	down	no	-0.86127	0.379356	down	no	norsolorinic acid reductase, putative
AFLA_011040	13.3994	10.01	3.01609	-0.424547	0.808578	down	no	-2.18943	2.46e-05	down	yes	conserved hypothetical protein
AFLA_011050	13.138	7.99698	4.47186	-0.724145	0.703693	down	no	-1.60989	0.00683966	down	yes	hypothetical protein
AFLA_011060	5.45834	4.52916	2.75178	-0.304538	0.919979	down	no	-1.04995	0.0652865	down	no	conserved hypothetical protein
AFLA_011070	0.417819	0.271792	0.240105	-0.778393	0.756377	down	no	-0.951283	0.623048	down	no	RNA-dependent RNA polymerase, putative
AFLA_011080	2.64275	2.60175	3.87816	-0.0844892	1	down	no	0.497413	0.38486	up	no	beta-xylosidase, putative
AFLA_011090	7.46318	6.56483	5.69505	-0.21584	0.889256	down	no	-0.40912	0.432071	down	no	MFS allantoate transporter, putative
AFLA_011100	4.70356	4.64777	4.58106	-0.0363763	1	down	no	-0.0744712	1	down	no	C6 finger domain protein, putative
AFLA_011110	2.70892	1.54386	2.0699	-0.86525	0.435427	down	no	-0.42584	0.576365	down	no	conserved hypothetical protein
AFLA_011120	0.558034	0.599091	0.510754	0.106685	1	up	no	-0.123703	1	down	no	flavin-containing amine oxidase, putative
AFLA_011130	35.7136	18.4133	14.0748	-0.994665	0.15542	down	no	-1.3751	1.23e-06	down	yes	conserved hypothetical protein
AFLA_011140	0.0689636	0.0671664	0.0326625	-0.0463503	1	down	no	-1.21457	1	down	no	hypothetical protein
AFLA_011150	0	0.0268165	0.0633388	Inf	1	up	no	Inf	0.460594	up	no	allantoate permease, putative
AFLA_011160	0	0	0.0585851					Inf	1	up	no	conserved hypothetical protein
AFLA_011180	0.122711	0	0.0389879	#NAME?	0.728781	down	no	-1.84422	0.845095	down	no	allantoate permease, putative
AFLA_011200	0.40288	0.274698	0.912903	-0.580491	1	down	no	1.05503	0.297553	up	no	alpha-ketoglutarate-dependent sulfonate dioxygenase, putative
AFLA_011210	1.05032	1.64993	2.97178	0.638904	0.849543	up	no	1.4802	0.119129	up	no	hypothetical protein
AFLA_011220	0.371152	1.32801	2.54287	1.86356	0.271518	up	no	2.79799	0.00207761	up	yes	glucose dehydrogenase, putative
AFLA_011230	13.955	46.1313	56.5267	1.70524	0.000938646	up	yes	1.96624	4.47e-10	up	yes	glycosyl hydrolase, putative
AFLA_011240	39.4298	18.4842	12.8879	-1.21129	0.220866	down	no	-1.74152	0.204135	down	no	conserved hypothetical protein
AFLA_011250	10.5254	9.28656	19.3729	-0.251852	0.956517	down	no	0.777775	0.12931	up	no	conserved hypothetical protein
AFLA_011260	1.46477	1.0847	1.03334	-0.452865	0.875454	down	no	-0.555226	0.60676	down	no	electron transport oxidoreductase, putative
AFLA_011270	8.93988	4.71535	6.69971	-0.980279	0.311706	down	no	-0.490496	0.547871	down	no	zinc-containing alcohol dehydrogenase, putative
AFLA_011280	25.0896	31.1634	15.6153	0.315895	0.818075	up	no	-0.702701	0.0324378	down	no	acyl-CoA dehydrogenase, putative
AFLA_011290	270.514	423.204	282.241	0.616915	0.537417	up	no	0.000615033	1	up	no	efflux pump antibiotic resistance protein, putative
AFLA_011300	23.0242	39.3138	33.6105	0.706486	0.570681	up	no	0.440204	0.395587	up	no	conserved hypothetical protein
AFLA_011310	1.02258	1.88709	1.87099	0.897194	0.385035	up	no	0.833778	0.134376	up	no	vps9-ankyrin repeat-containing protein, putative
AFLA_011320	1.1902	1.0969	0.414046	-0.049066	1	down	no	-1.48667	0.310636	down	no	conserved hypothetical protein
AFLA_011330	0.543086	0.185678	0.325261	-1.53741	0.453882	down	no	-0.685165	0.594519	down	no	MFS transporter, putative
AFLA_011340	0	0.0819044	0.166996	Inf	1	up	no	Inf	0.727401	up	no	hypothetical protein
AFLA_011350	0.0207062	0.126571	0.0418998	2.43564	0.564085	up	no	0.769704	1	up	no	conserved hypothetical protein
AFLA_011360	15.2157	56.5928	63.3827	1.88951	0.00172946	up	yes	2.01028	3.1e-07	up	yes	conserved hypothetical protein
AFLA_011370	33.0319	164.089	164.313	2.28584	0.000118829	up	yes	2.24139	5.38e-07	up	yes	conserved hypothetical protein
AFLA_011380	8.68664	5.69101	14.9151	-0.610126	0.626793	down	no	0.753816	0.154795	up	no	conserved hypothetical protein
AFLA_011390	4.61758	0.977878	4.08311	-2.26477	0.138298	down	no	-0.181312	0.935094	down	no	hypothetical protein
AFLA_011400	6.52594	1.55589	6.31459	-2.0668	0.0332989	down	yes	-0.0421464	1	down	no	conserved hypothetical protein
AFLA_011410	0	0	0.137714					Inf	0.675312	up	no	conserved hypothetical protein
AFLA_011430	0	0	0.209799					Inf	0.495121	up	no	alpha-L-arabinofuranosidase, putative
AFLA_011440	0.178312	0.237659	0.141109	0.359192	1	up	no	-0.39461	1	down	no	endoglucanase, putative
AFLA_011450	4.63313	11.8042	1.47198	1.27535	0.35227	up	no	-1.69162	0.114261	down	no	hypothetical protein
AFLA_011460	52.1243	26.5464	23.8607	-0.984092	0.391216	down	no	-1.11554	1.41e-05	down	yes	GMC oxidoreductase, putative
AFLA_011470	39.3852	46.4025	13.2184	0.199718	0.930482	up	no	-1.60132	9.08e-09	down	yes	conserved hypothetical protein
AFLA_011480	183.791	266.244	219.118	0.497656	0.669534	up	no	0.222664	0.611307	up	no	amino acid permease (Can1), putative
AFLA_011490	0.910541	0.915589	0.730221	-0.0459398	1	down	no	-0.351909	0.783715	down	no	MFS monocarboxylate transporter, putative
AFLA_011500	0.189007	0.92216	0.207663	2.30405	0.758745	up	no	0.220994	1	up	no	hypothetical protein
AFLA_011510	0.741414	0.548359	0.771212	-0.430659	0.962262	down	no	0.0908824	1	up	no	hypothetical protein
AFLA_011520	1.33811	0.958761	0.972017	-0.52678	0.772244	down	no	-0.481385	0.476799	down	no	conserved hypothetical protein
AFLA_011530	1029.39	224.442	509.582	-2.31603	0.111151	down	no	-1.09498	0.0265947	down	yes	hypothetical protein
AFLA_011540	8.77252	12.3743	40.4626	0.30632	1	up	no	2.05222	1.73e-06	up	yes	conserved hypothetical protein
AFLA_011550	3.68329	63.2114	109.703	4.0593	2.54e-17	up	yes	4.86672	4.03e-37	up	yes	tannase, putative
AFLA_011560	6.2186	4.74598	9.39253	-0.419103	0.812908	down	no	0.539493	0.26443	up	no	phosphatidylglycerol specific phospholipase, putative
AFLA_011570	16.2581	18.4345	18.9049	0.188328	0.90591	up	no	0.197562	0.711912	up	no	dynein intermediate chain, putative
AFLA_011580	864.345	919.801	653.188	0.0896833	0.994271	up	no	-0.428652	0.111824	down	no	conserved hypothetical protein
AFLA_011590	19.1532	19.8406	25.6162	0.0537449	1	up	no	0.405931	0.363348	up	no	COP9 signalosome subunit 8 (CsnH), putative
AFLA_011600	17.8881	35.6976	32.8333	1.01007	0.123769	up	no	0.865678	0.00578466	up	no	oligosaccharyl transferase subunit (Stt3), putative
AFLA_011610	100.085	171.694	157.395	0.781432	0.270286	up	no	0.628267	0.0486199	up	no	conserved hypothetical protein
AFLA_011620	26.537	25.329	21.8701	-0.0919541	0.977814	down	no	-0.297788	0.363836	down	no	mRNA cleavage and polyadenylation specificity factor complex subunit
AFLA_011630	22.8351	29.3593	23.5471	0.336082	0.787082	up	no	0.00699364	1	up	no	transcriptional regulatory protein DEP1, putative
AFLA_011640	75.2619	35.618	35.0933	-1.0795	0.107922	down	no	-1.0896	6.74e-06	down	yes	RNA binding protein, putative
AFLA_011650	59.9048	115.666	101.764	0.877166	0.418857	up	no	0.665582	0.0741184	up	no	conserved hypothetical protein
AFLA_011660	199.72	183.434	182.817	-0.233452	0.908815	down	no	-0.226609	0.523503	down	no	conserved hypothetical protein
AFLA_011670	1.77004	1.86544	1.19749	0.108701	1	up	no	-0.52507	0.659873	down	no	conserved hypothetical protein
AFLA_011680	3.99593	3.79916	2.87452	-0.0744055	1	down	no	-0.500588	0.436634	down	no	conserved hypothetical protein
AFLA_011690	3.04812	3.09509	3.55782	0.0372344	1	up	no	0.230309	0.886798	up	no	2-hydroxyacid dehydrogenase, putative
AFLA_011700	1026.88	1273.97	1392.34	0.293907	0.867541	up	no	0.404177	0.222567	up	no	GPI anchored protein, putative
AFLA_011710	7.36467	10.0729	8.84753	0.480486	0.698926	up	no	0.261779	0.712296	up	no	conserved hypothetical protein
AFLA_011720	37.9301	45.1366	47.6656	0.244834	0.87099	up	no	0.31271	0.399524	up	no	CCCH zinc finger protein
AFLA_011730	49.1192	16.8748	19.8748	-1.5391	0.0601591	down	no	-1.28314	9.99e-05	down	yes	DNA-directed RNA polymerase III subunit 22.9 kDa, putative
AFLA_011740	105.32	90.7577	86.6125	-0.232665	0.854833	down	no	-0.300101	0.346213	down	no	cystathionine gamma-lyase
AFLA_011750	16.4151	10.8189	13.7911	-0.611551	0.498371	down	no	-0.251251	0.5566	down	no	conserved hypothetical protein
AFLA_011760	209.974	321.349	285.086	0.621123	0.427663	up	no	0.416909	0.243206	up	no	NADH-ubiquinone oxidoreductase 178 kDa subunit, putative
AFLA_011770	20.8514	32.8656	38.0726	0.638704	0.444959	up	no	0.843452	0.00334734	up	no	conserved hypothetical protein
AFLA_011780	4.84631	7.99118	6.03409	0.695248	0.549629	up	no	0.276218	0.740887	up	no	hypothetical protein
AFLA_011790	11.4954	12.7576	11.0454	0.113339	0.968261	up	no	-0.106024	0.841902	down	no	C2H2 finger domain protein, putative
AFLA_011800	21.8999	22.0966	25.5709	-0.00850109	1	down	no	0.188938	0.623831	up	no	conserved hypothetical protein
AFLA_011810	10.526	10.5162	9.16408	5.49e-05	1	up	no	-0.211713	0.586548	down	no	AAA family ATPase, putative
AFLA_011820	72.2512	68.2183	68.9909	-0.0651541	1	down	no	-0.0702705	0.863559	down	no	translocation protein (Sec66), putative
AFLA_011830	0.0526202	0.0707315	0.167063	0.0966237	1	up	no	1.46065	0.746096	up	no	hypothetical protein
AFLA_011840	0.0815579	0.105613	0.338206	0.359283	1	up	no	2.13467	0.635416	up	no	conserved hypothetical protein
AFLA_011850	0.227652	0.24638	0.618888	0.0930791	1	up	no	1.4245	0.521662	up	no	conserved hypothetical protein
AFLA_011860	15.6963	13.6959	15.7959	-0.182997	0.899865	down	no	0.0202365	1	up	no	pentatricopeptide repeat protein
AFLA_011870	13.6763	11.2953	12.3084	-0.274883	0.882327	down	no	-0.162478	0.831166	down	no	hypothetical protein
AFLA_011880	8.18952	8.77824	9.45957	0.1267	1	up	no	0.221307	0.81803	up	no	origin recognition complex subunit 3, putative
AFLA_011890	7.7285	11.3629	9.37636	0.565277	0.60176	up	no	0.263845	0.720239	up	no	conserved hypothetical protein
AFLA_011900	50.6452	25.3977	17.5649	-1.0208	0.474216	down	no	-1.51172	4.83e-11	down	yes	rRNA maturation protein (Nop14), putative
AFLA_011910	1.04661	0.736302	0.998629	-0.48154	0.832354	down	no	-0.0365949	1	down	no	triacylglycerol lipase, putative
AFLA_011920	17.2463	9.03353	13.666	-0.909979	0.331909	down	no	-0.309132	0.525526	down	no	G-patch domain protein, putative
AFLA_011930	38.8989	43.1027	41.5648	0.112007	0.974046	up	no	0.0535353	0.987451	up	no	conserved hypothetical protein
AFLA_011940	28.9365	42.2344	34.8453	0.505826	0.56865	up	no	0.217977	0.604195	up	no	C2H2 zinc finger protein
AFLA_011950	25.0368	16.8837	19.0521	-0.560559	0.515218	down	no	-0.388554	0.290092	down	no	suppressor protein SRP40, putative
AFLA_011960	65.2191	66.5047	83.2896	0.0312217	1	up	no	0.342683	0.428965	up	no	hypothetical protein
AFLA_011970	20.992	23.1873	29.0031	0.0748009	1	up	no	0.413832	0.369965	up	no	MFS transporter, putative
AFLA_011980	14.6262	6.98085	7.45777	-1.06701	0.132057	down	no	-0.961672	0.00337516	down	no	conserved hypothetical protein
AFLA_011990	9.92231	8.44214	4.43323	-0.174776	1	down	no	-1.109	0.237349	down	no	hypothetical protein
AFLA_012000	18.0588	10.2575	6.47629	-0.770355	0.515218	down	no	-1.4475	0.00276582	down	yes	hypothetical protein
AFLA_012010	20.559	11.5875	6.99751	-0.779876	0.435427	down	no	-1.51899	4.81e-05	down	yes	C6 transcription factor (Ctf1B), putative
AFLA_012020	14.5359	11.9194	18.4384	-0.36943	0.846969	down	no	0.237734	0.770144	up	no	carboxypeptidase S1, putative
AFLA_012030	63.0839	8.11634	7.73553	-2.95584	1.01e-05	down	yes	-3.00709	2.23e-34	down	yes	DUF895 domain membrane protein
AFLA_012040	15.4081	12.4158	22.3485	-0.295484	0.909033	down	no	0.544458	0.514655	up	no	hypothetical protein
AFLA_012050	94.461	27.5571	26.9037	-1.81194	0.00086804	down	yes	-1.84666	2.52e-06	down	yes	N-acetylglucosamine-6-phosphate deacetylase (NagA), putative
AFLA_012060	938.74	734.25	401.793	-0.492403	0.934113	down	no	-1.29805	0.133259	down	no	choline oxidase (CodA), putative
AFLA_012070	155.571	123.392	75.5132	-0.43877	0.866644	down	no	-1.09821	0.0479861	down	yes	betaine aldehyde dehydrogenase (BadH), putative
AFLA_012080	105.204	20.9657	13.7785	-2.39703	0.0048858	down	yes	-2.97433	4.97e-09	down	yes	glucosamine-6-phosphate deaminase, putative
AFLA_012090	37.1143	26.6687	26.8262	-0.485453	0.602262	down	no	-0.480531	0.093268	down	no	beta-N-acetylglucosaminidase, putative
AFLA_012100	29.8278	21.0775	14.1242	-0.508584	0.575223	down	no	-1.09133	0.000108167	down	yes	NDT80_PhoG domain protein PcaG
AFLA_012110	33.3901	28.9836	30.7199	-0.236913	0.848568	down	no	-0.140951	0.672408	down	no	cleavage and polyadenylation specificity factor subunit A, putative
AFLA_012120	32.093	37.4065	44.1723	0.185189	0.924369	up	no	0.424466	0.229679	up	no	LMBR1 domain protein, putative
AFLA_012130	32.2488	43.0974	42.9455	0.42783	0.716439	up	no	0.396515	0.529805	up	no	hypothetical protein
AFLA_012140	22.2852	29.3798	27.7932	0.352519	0.758174	up	no	0.268358	0.538331	up	no	conserved hypothetical protein
AFLA_012150	39.3713	35.3485	38.2711	-0.14495	0.948955	down	no	-0.043997	0.943694	down	no	ZIP family zinc transporter, putative
AFLA_012160	279.09	282.276	441.009	-0.0042105	1	down	no	0.624959	0.0256929	up	no	acetyl-CoA acetyltransferase, putative
AFLA_012170	40.6914	37.4517	48.2912	-0.108229	0.959446	down	no	0.254163	0.523288	up	no	U5 snRNP component Snu114, putative
AFLA_012180	32.5742	30.1567	40.9747	-0.121691	0.968261	down	no	0.316393	0.513587	up	no	cytoplasmic protein required for cell viability, putative
AFLA_012190	45.5903	72.8177	68.6118	0.659694	0.433313	up	no	0.566601	0.0604864	up	no	C6 finger domain protein, putative
AFLA_012200	542.848	238.655	188.459	-1.20891	0.264903	down	no	-1.52615	1.47e-12	down	yes	Hsp70 chaperone (HscA), putative
AFLA_012220	66.8713	58.3306	72.0162	-0.219615	0.902366	down	no	0.0776531	0.962215	up	no	cyclin-dependent kinases regulatory subunit, putative
AFLA_012230	248.022	323.512	566.299	0.330244	0.794049	up	no	1.11261	8.89e-05	up	yes	conserved hypothetical protein
AFLA_012240	119.506	130.428	108.798	0.120179	0.987296	up	no	-0.153278	0.659426	down	no	conserved hypothetical protein
AFLA_012250	60.1839	57.0436	64.5622	-0.0662132	1	down	no	0.0982834	0.900298	up	no	conserved hypothetical protein
AFLA_012260	31.5315	41.3226	35.6529	0.41159	0.735835	up	no	0.185451	0.750923	up	no	RING finger domain protein, putative
AFLA_012270	231.064	269.225	284.149	0.172304	0.912669	up	no	0.239848	0.487986	up	no	peptidyl-prolyl cis-trans isomerase, putative
AFLA_012370	84.0662	34.2016	45.7741	-1.33983	0.0296418	down	yes	-0.911057	0.00118082	down	no	conserved hypothetical protein
AFLA_012380	56.5403	32.9843	36.3844	-0.776102	0.561508	down	no	-0.611846	0.0287415	down	no	U3 small nucleolar ribonucleoprotein protein Mpp10
AFLA_012390	3.67044	6.93534	3.51832	0.922335	0.582581	up	no	-0.0966681	1	down	no	hypothetical protein
AFLA_012400	30.5933	66.2462	42.3826	1.05052	0.262728	up	no	0.387596	0.596107	up	no	oxidoreductase, short-chain dehydrogenase/reductase family
AFLA_012410	297.389	333.323	299.477	0.145283	0.930482	up	no	-0.0351458	0.95249	down	no	NADH-ubiquinone oxidoreductase subunit B, putative
AFLA_012420	69.0532	64.9765	68.9012	-0.0984635	1	down	no	-0.0275902	1	down	no	conserved hypothetical protein
AFLA_012430	34.0496	41.139	47.3719	0.265309	0.87537	up	no	0.468593	0.192792	up	no	malonyl CoA-acyl carrier protein transacylase, putative
AFLA_012440	38.354	23.14	23.3876	-0.732894	0.320212	down	no	-0.711734	0.0197967	down	no	hypothetical protein
AFLA_012450	34.4764	26.0072	25.3544	-0.424793	0.671573	down	no	-0.445874	0.140733	down	no	nuclear pore complex subunit Nup133, putative
AFLA_012460	54.8696	90.8728	93.6439	0.706501	0.330916	up	no	0.725709	0.026023	up	no	STF2-like protein
AFLA_012560	20.1004	29.662	37.609	0.567194	0.558822	up	no	0.881957	0.0473298	up	no	conserved hypothetical protein
AFLA_012860	9.93263	24.1927	15.6128	1.25361	0.114995	up	no	0.580236	0.173846	up	no	hypothetical protein
AFLA_012870	7.51325	16.0095	11.4878	1.06039	0.240713	up	no	0.534545	0.283434	up	no	conserved hypothetical protein
AFLA_012880	21.9241	16.4804	17.574	-0.417565	0.674771	down	no	-0.324014	0.403611	down	no	pheromone response protein, putative
AFLA_012890	0.0992563	0.0984221	0.077224	-0.0403168	1	down	no	-0.291351	1	down	no	hypothetical protein
AFLA_012900	0.0432876	0.0446706	0.049369	-0.138251	1	down	no	-0.0521554	1	down	no	hypothetical protein
AFLA_012910	0.602508	0.221291	0.106873	-1.50669	0.377189	down	no	-2.55574	0.0200032	down	yes	MFS sugar transporter, putative
AFLA_012920	0.131771	0.0444365	0	-1.68889	0.84747	down	no	#NAME?	0.354868	down	no	conserved hypothetical protein
AFLA_012930	0	0.242511	0	Inf	0.381921	up	no					conserved hypothetical protein
AFLA_012940	0.109046	0.291332	0.0456623	1.35754	0.608771	up	no	-1.34135	0.733921	down	no	sulfatase, putative
AFLA_012950	9.20671	10.3366	9.36241	0.125586	1	up	no	0.00734422	1	up	no	conserved hypothetical protein
AFLA_012960	13.7597	15.1238	12.2949	0.121355	0.986896	up	no	-0.18337	0.663464	down	no	endoglycoceramidase, putative
AFLA_012970	1.39217	0.631155	0.711896	-1.13504	0.393303	down	no	-0.999488	0.170689	down	no	conserved hypothetical protein
AFLA_012980	1.833	1.09006	0.771511	-0.771781	0.704416	down	no	-1.27619	0.1566	down	no	conserved hypothetical protein
AFLA_012990	0.3602	0.167526	0	-1.12925	0.902615	down	no	#NAME?	0.242689	down	no	NAD dependent epimerase/dehydratase, putative
AFLA_013000	0.234485	0.0607062	0.134182	-1.92377	0.84747	down	no	-0.825162	1	down	no	NAD dependent epimerase/dehydratase, putative
AFLA_013010	0.538245	0.424955	0.0539826	-0.465416	0.935122	down	no	-3.44405	0.0214697	down	yes	conserved hypothetical protein
AFLA_013020	0.687155	0.364755	0.13764	-0.898709	0.610412	down	no	-2.28421	0.0157113	down	yes	efflux pump antibiotic resistance protein, putative
AFLA_013030	2.6849	1.20144	0.953314	-1.19296	0.368518	down	no	-1.54442	0.0292608	down	yes	conserved hypothetical protein
AFLA_013040	12.3244	6.22154	4.63605	-0.954462	0.438891	down	no	-1.41655	0.000571713	down	yes	conserved hypothetical protein
AFLA_013050	8.10541	7.09227	3.91253	-0.177154	0.985975	down	no	-1.0713	0.058799	down	no	conserved hypothetical protein
AFLA_013060	4.44357	2.04685	5.46153	-1.18676	0.291581	down	no	0.183337	0.794123	up	no	conserved hypothetical protein
AFLA_013070	3.53685	4.27265	2.09409	0.290829	0.889226	up	no	-0.752533	0.19132	down	no	sugar transporter, putative
AFLA_013080	0.986426	1.60682	1.62698	0.69556	0.887646	up	no	0.722945	0.702776	up	no	conserved hypothetical protein
AFLA_013090	1.22782	1.76287	0.927203	0.510845	0.781361	up	no	-0.434891	0.677803	down	no	fungal specific transcription factor, putative
AFLA_013100	0.268489	0.0887856	0	-1.59704	0.737778	down	no	#NAME?	0.121867	down	no	conserved hypothetical protein
AFLA_013110	0.171362	0.143118	0.13838	-0.348766	1	down	no	-0.376213	1	down	no	efflux pump antibiotic resistance protein, putative
AFLA_013120	0.115601	0.184501	0	0.508119	0.987051	up	no	#NAME?	0.353321	down	no	conserved hypothetical protein
AFLA_013130	4.29199	4.61281	5.03706	0.116327	0.99849	up	no	0.217015	0.82663	up	no	hypothetical protein
AFLA_013140	1.52028	1.27656	3.11718	-0.217617	1	down	no	1.05895	0.296652	up	no	conserved hypothetical protein
AFLA_013150	1.40791	1.82433	3.45763	0.399319	0.858474	up	no	1.30193	0.0316938	up	yes	conserved hypothetical protein
AFLA_013160	3.56422	7.73218	14.4349	1.07756	0.178013	up	no	1.95244	1.11e-05	up	yes	methyltransferase family protein
AFLA_013170	21.1386	24.0626	41.3787	0.167586	0.954083	up	no	0.935024	0.058559	up	no	hypothetical protein
AFLA_013180	116.627	62.6417	14.6816	-1.0267	0.263474	down	no	-3.12976	5.57e-12	down	yes	williams-beuren syndrome chromosome region, putative
AFLA_013190	2.65143	2.01529	1.9672	-0.41247	0.860552	down	no	-0.443995	0.735999	down	no	conserved hypothetical protein
AFLA_013200	2.47683	3.65034	2.73742	0.549287	0.712329	up	no	0.132256	0.947838	up	no	conserved hypothetical protein
AFLA_013210	0.0410712	0.0425817	0.0868898	0.155451	1	up	no	1.12033	1	up	no	conserved hypothetical protein
AFLA_013220	9.16696	4.37472	2.13106	-1.2034	0.261601	down	no	-2.25148	0.000170557	down	yes	beta-lactamase family protein
AFLA_013230	20.1944	11.2233	5.38874	-1.00858	0.525884	down	no	-2.06326	0.0774772	down	no	steroid monooxygenase, putative
AFLA_013240	0.0389932	0.0525365	0.139314	0.236013	1	up	no	1.73998	0.460026	up	no	C6 transcription factor, putative
AFLA_013250	1.79543	0.752939	1.22806	-1.32085	0.276862	down	no	-0.594742	0.486126	down	no	maltose permease, putative
AFLA_013260	2.30583	2.20529	1.58996	-0.0630585	1	down	no	-0.536227	0.442872	down	no	conserved hypothetical protein
AFLA_013270	59.4767	109.626	67.4709	0.781137	0.585258	up	no	0.0807125	0.948085	up	no	conserved hypothetical protein
AFLA_013280	1.07404	1.2358	0.747854	0.135245	1	up	no	-0.573451	0.480194	down	no	class V chitinase, putative
AFLA_013290	1.42721	0.951584	1.17235	-0.631832	0.846985	down	no	-0.306418	0.892045	down	no	conserved hypothetical protein
AFLA_013300	7.03249	5.14117	2.63903	-0.502464	0.728781	down	no	-1.48695	0.117967	down	no	oxidoreductase, 2-nitropropane dioxygenase family, putative
AFLA_013310	1.35643	0.557977	0.600957	-1.30836	0.388204	down	no	-1.18301	0.102129	down	no	conserved hypothetical protein
AFLA_013320	8.65206	8.44064	11.5212	-0.0408327	1	down	no	0.403364	0.477142	up	no	cellulase family protein
AFLA_013330	2.12692	2.78963	2.5653	0.353058	0.863822	up	no	0.212815	0.811989	up	no	oligopeptide transporter, putative
AFLA_013340	10.1265	11.1676	11.1919	0.162675	1	up	no	0.158936	0.962215	up	no	conserved hypothetical protein
AFLA_013350	364.611	360.618	80.6129	-0.0601474	1	down	no	-2.2564	9.98e-11	down	yes	hypothetical protein
AFLA_013360	110.875	395.971	245.025	1.82199	0.00425747	up	yes	1.07821	0.00230309	up	yes	glutamine-serine-proline rich protein, putative
AFLA_013370	80.2573	75.2197	30.7806	-0.186028	0.977877	down	no	-1.45574	9.43e-10	down	yes	sugar transporter, putative
AFLA_013380	1.49235	2.74751	0.345976	0.862566	0.743968	up	no	-2.06908	0.075819	down	no	hypothetical protein
AFLA_013390	0.581148	0.305866	0.250033	-0.983234	0.840555	down	no	-1.31435	0.47611	down	no	conserved hypothetical protein
AFLA_013400	20.9137	10.2403	9.42614	-1.05362	0.137148	down	no	-1.16342	2.54e-05	down	yes	ankyrin repeat-containing protein, putative
AFLA_013410	29.8309	14.9683	11.759	-1.00142	0.248936	down	no	-1.38856	0.00402482	down	yes	conserved hypothetical protein
AFLA_013420	0.529353	0.131534	0.665132	-1.98299	0.239533	down	no	0.351318	0.850857	up	no	conserved hypothetical protein
AFLA_013430	0.224669	0	0.229055	#NAME?	1	down	no	0.148837	1	up	no	hypothetical protein
AFLA_013440	0.672739	0.839168	1.01012	0.281432	0.920397	up	no	0.530792	0.490286	up	no	rhamnosidase B, putative
AFLA_013450	0.12075	0	0	#NAME?	1	down	no	#NAME?	1	down	no	hypothetical protein
AFLA_013460	0.168301	0	0	#NAME?	0.876886	down	no	#NAME?	0.733901	down	no	hypothetical protein
AFLA_013470	0.286647	0.372862	0.343526	0.318822	0.976811	up	no	0.223095	0.955938	up	no	flavin-containing amine oxidasedehydrogenase, putative
AFLA_013480	1.24515	1.80284	1.57566	0.496886	0.829182	up	no	0.290847	0.865509	up	no	conserved hypothetical protein
AFLA_013490	0.998714	0.979069	0.525494	-0.139955	1	down	no	-0.988011	0.276011	down	no	amino acid transporter, putative
AFLA_013500	1.80456	1.66943	0.269757	-0.131294	1	down	no	-2.70249	0.021705	down	yes	conserved hypothetical protein
AFLA_013510	12.065	23.4329	6.58485	0.935593	0.269791	up	no	-0.890811	0.104287	down	no	myo-inositol transporter
AFLA_013520	122.078	106.224	53.9946	-0.189987	0.948955	down	no	-1.18544	0.00472317	down	yes	cytochrome P450, putative
AFLA_013530	1.93032	2.38358	0.347559	0.365119	0.983528	up	no	-2.44571	0.0323801	down	yes	conserved hypothetical protein
AFLA_013540	3.92551	6.15694	2.74185	0.566019	0.648807	up	no	-0.583931	0.432071	down	no	neuroligin, putative
AFLA_013550	10.3645	8.62936	1.48459	-0.355696	0.956385	down	no	-2.85534	3.49e-05	down	yes	hypothetical protein
AFLA_013560	13.8035	11.5361	6.08997	-0.321459	0.86938	down	no	-1.22157	0.00614083	down	yes	conserved hypothetical protein
AFLA_013570	1.05492	0.604911	0.2157	-0.822388	0.813473	down	no	-2.34142	0.422239	down	no	conserved hypothetical protein
AFLA_013580	0.220836	0.0328074	0	-2.82213	0.391216	down	no	#NAME?	0.0581375	down	no	amino acid transporter, putative
AFLA_013590	1.60709	0.879672	1.26994	-0.878029	0.522496	down	no	-0.360632	0.71711	down	no	conserved hypothetical protein
AFLA_013600	7.84283	1.65937	8.18241	-2.409	0.356891	down	no	-0.0240098	1	down	no	hypothetical protein
AFLA_013610	4.71918	4.28312	12.536	-0.239315	0.936722	down	no	1.29058	0.00552784	up	yes	multidrug resistance protein, putative
AFLA_013620	3.35766	3.9882	10.3292	0.1066	1	up	no	1.4395	0.0461386	up	yes	carboxylesterase, type B, putative
AFLA_013630	3.80001	6.63211	32.6777	0.651255	0.829782	up	no	2.91133	0.0219487	up	yes	conserved hypothetical protein
AFLA_013640	699.519	1022.61	2712.87	0.378115	1	up	no	1.7222	0.00511486	up	yes	hypothetical protein
AFLA_013650	0.443823	0.543369	0.229451	0.273283	1	up	no	-0.896117	0.649516	down	no	allantoate permease, putative
AFLA_013660	1.1998	0.856042	1.29677	-0.47317	0.813833	down	no	0.137448	1	up	no	amidohydrolase amhX, putative
AFLA_013670	10.7716	1.6687	3.35188	-2.77673	0.000358503	down	yes	-1.77363	0.000191276	down	yes	oxidoreductase CipA-like, putative
AFLA_013680	2.73493	1.89641	3.21246	-0.629986	0.698926	down	no	0.142199	0.897914	up	no	phosphatidylglycerol specific phospholipase C, putative
AFLA_013690	106.702	173.966	114.825	0.693547	0.465687	up	no	0.048539	0.938313	up	no	chitin synthase C
AFLA_013700	53.6926	25.3594	36.348	-1.19449	0.413418	down	no	-0.649407	0.0192558	down	no	MFS transporter, putative
AFLA_013710	590.442	478.35	964.434	-0.40709	0.774114	down	no	0.604688	0.0528734	up	no	conserved hypothetical protein
AFLA_013720	117.485	96.6198	114.931	-0.390434	0.784124	down	no	-0.134665	0.717715	down	no	conserved hypothetical protein
AFLA_013730	8.28329	7.087	8.29656	-0.371758	0.944131	down	no	-0.111507	0.778327	down	no	conserved hypothetical protein
AFLA_013740	5.0596	3.45934	2.14413	-0.642929	0.64977	down	no	-1.32003	0.0220089	down	yes	Acid phosphatase precursor, putative
AFLA_013750	0.395966	0.161135	0	-1.25705	0.792026	down	no	#NAME?	0.0772995	down	no	NPP1 domain protein, putative
AFLA_013760	0.444171	0.183312	0.109537	-1.17141	0.822621	down	no	-1.99734	0.241309	down	no	endo-1,4-beta-glucanase, putative
AFLA_013770	0.427976	0.526076	0.204556	0.164083	1	up	no	-1.18305	0.680005	down	no	conserved hypothetical protein
AFLA_013780	0.219573	0.113824	0.212934	-0.844549	1	down	no	-0.0333335	1	down	no	conserved hypothetical protein
AFLA_013790	3.37675	2.01722	0.695466	-0.746417	0.846994	down	no	-2.22284	0.0177862	down	yes	conserved hypothetical protein
AFLA_013800	1.49924	0.484134	0.151749	-1.72111	0.487153	down	no	-3.29249	0.132735	down	no	monocarboxylate transporter, putative
AFLA_013810	1.24394	1.14568	0.175608	-0.187305	1	down	no	-2.83653	0.252801	down	no	hypothetical protein
AFLA_013820	3.28588	2.07481	0.831444	-0.675509	0.585442	down	no	-1.99076	0.000397765	down	yes	MFS myo-inositol transporter, putative
AFLA_013830	49.6308	67.5007	38.9065	0.440634	0.688444	up	no	-0.358906	0.385083	down	no	amino acid transporter, putative
AFLA_013840	0.0445989	0.111439	0.165614	1.44848	0.830948	up	no	1.95897	0.453732	up	no	conserved hypothetical protein
AFLA_013850	0.0258858	0	0	#NAME?	1	down	no	#NAME?	1	down	no	UDP-glucose dehydrogenase/UDP-mannac dehydrogenase, putative
AFLA_013860	16.9356	23.5399	16.126	0.414317	0.726461	up	no	-0.144713	0.871469	down	no	BNR/Asp-box repeat domain protein
AFLA_013870	19.7091	29.6142	31.6846	0.588652	0.517623	up	no	0.6619	0.119754	up	no	4-carboxymuconolactone decarboxylase family protein
AFLA_013880	9.56556	19.0903	24.2987	1.03054	0.370237	up	no	1.34391	0.00131203	up	yes	lipase 2 precursor, putative
AFLA_013890	3.45986	2.43112	2.48989	-0.551108	0.698926	down	no	-0.52863	0.585383	down	no	C2H2 transcription factor, putative
AFLA_013900	4.28439	3.53538	2.61117	-0.29756	0.864048	down	no	-0.741917	0.284986	down	no	conserved hypothetical protein
AFLA_013910	0.476503	0.0790742	0.119038	-2.69999	0.448586	down	no	-2.01693	0.380862	down	no	conserved hypothetical protein
AFLA_013920	0	0.0225051	0	Inf	1	up	no					conserved hypothetical protein
AFLA_013930	0.360347	0.178325	0.180478	-1.07803	0.86938	down	no	-1.06296	0.587841	down	no	short-chain dehydrogenase, putative
AFLA_013940	4.26373	3.9495	6.77633	-0.18942	0.998499	down	no	0.572494	0.481833	up	no	hypothetical protein
AFLA_013950	0	0.742235	0.803498	Inf	0.380743	up	no	Inf	0.152648	up	no	hypothetical protein
AFLA_013960	9.965	5.4574	4.33333	-1.01051	0.40574	down	no	-1.35217	0.0681443	down	no	conserved hypothetical protein
AFLA_013970	2.98364	3.02896	2.45185	-0.0324634	1	down	no	-0.342922	0.786413	down	no	NPRS-like enzyme, putative
AFLA_013980	34.068	51.4636	62.2539	0.582795	0.447259	up	no	0.820337	0.0300635	up	no	aminopeptidase, putative
AFLA_013990	0.728259	0.308258	0.95914	-1.2775	0.510354	down	no	0.335237	0.763959	up	no	aspartate aminotransferase, putative
AFLA_014000	9.91753	11.8373	35.8911	0.201992	0.916175	up	no	1.76596	8.6e-05	up	yes	glutathione-S-transferase theta, GST, putative
AFLA_014010	1.94976	1.40339	9.99718	-0.438234	0.858434	down	no	2.35508	2.16e-06	up	yes	integral membrane protein
AFLA_014020	6.26784	4.67315	20.4592	-0.461943	0.913878	down	no	1.63012	0.000617361	up	yes	conserved hypothetical protein
AFLA_014030	28.8105	9.11065	1.86939	-1.8091	0.270286	down	no	-4.08569	4.94e-05	down	yes	hypothetical protein
AFLA_014040	28.5358	4.12761	1.83402	-2.87514	0.000113356	down	yes	-4.06827	0.00799392	down	yes	hypothetical protein
AFLA_014050	39.2533	51.751	83.0314	0.389473	0.693884	up	no	1.04237	0.000754826	up	yes	pyrroline-5-carboxylate reductase
AFLA_014060	0.078204	0	0	#NAME?	0.719973	down	no	#NAME?	0.507335	down	no	pectin lyase precursor, putative
AFLA_014070	0.756765	0.659901	0.209122	-0.198601	1	down	no	-1.89206	0.135249	down	no	monocarboxylate transporter, putative
AFLA_014080	0.525363	0.266016	0	-1.01289	1	down	no	#NAME?	0.353321	down	no	hypothetical protein
AFLA_014090	10.2788	13.6797	13.0915	0.394107	0.727315	up	no	0.286608	0.628939	up	no	conserved hypothetical protein
AFLA_014100	1007.33	1556.31	1930.46	0.592673	0.593124	up	no	0.857033	0.00197675	up	no	conserved hypothetical protein
AFLA_014110	1.26319	1.01967	1.59791	-0.361539	0.849543	down	no	0.283028	0.721412	up	no	conserved hypothetical protein
AFLA_014120	3.94827	3.82134	4.51393	-0.0559626	1	down	no	0.171152	0.855548	up	no	conserved hypothetical protein
AFLA_014130	29.355	20.056	17.7091	-0.649303	0.67116	down	no	-0.83662	0.0981045	down	no	conserved hypothetical protein
AFLA_014140	4.78831	5.62479	12.5646	0.172322	0.957114	up	no	1.33185	0.00236387	up	yes	aldehyde dehydrogenase family protein, putative
AFLA_014150	6.61365	7.54071	7.61868	0.0741103	1	up	no	0.0910848	1	up	no	conserved hypothetical protein
AFLA_014160	45.7024	42.3859	80.2199	-0.180984	0.97564	down	no	0.760011	0.242464	up	no	alcohol dehydrogenase, putative
AFLA_014170	2.47369	2.39993	2.43506	-0.161574	1	down	no	-0.0719768	0.988206	down	no	conserved hypothetical protein
AFLA_014180	0.350108	0.350442	0.099112	-0.111337	1	down	no	-1.83426	0.663461	down	no	conserved hypothetical protein
AFLA_014190	0.0904979	0.14957	0.0287973	0.691189	0.894622	up	no	-1.74161	0.740887	down	no	beta-glucosidase, putative
AFLA_014200	0.459766	0.197516	0.128089	-1.35439	0.603737	down	no	-1.94151	0.288118	down	no	sugar transporter, putative
AFLA_014210	14.386	4.02755	7.55581	-1.87333	0.00521016	down	yes	-1.00153	0.197545	down	no	MFS transporter, putative
AFLA_014220	3.918	2.21757	3.17529	-0.818933	0.675672	down	no	-0.326796	0.805307	down	no	hypothetical protein
AFLA_014230	10.7512	19.7391	17.3102	0.824542	0.279431	up	no	0.628807	0.230036	up	no	phosphatidylserine decarboxylase, putative
AFLA_014240	8.9371	21.5583	15.9887	1.20845	0.179187	up	no	0.803835	0.297019	up	no	conserved hypothetical protein
AFLA_014250	1.80801	0.81578	1.492	-1.15423	0.337689	down	no	-0.307773	0.862935	down	no	conserved hypothetical protein
AFLA_014260	5.60259	0.872821	10.7773	-2.88361	0.120191	down	no	0.736762	0.67607	up	no	conidial hydrophobin RodB/HypB
AFLA_014270	0.789307	0.539992	0.412147	-0.645802	0.787659	down	no	-1.03763	0.242828	down	no	C6 transcription factor, putative
AFLA_014280	1.32139	1.37478	1.24975	0.0318419	1	up	no	-0.101735	0.962215	down	no	conserved hypothetical protein
AFLA_014290	0.995266	1.32105	0.987843	0.381581	0.813473	up	no	-0.091972	1	down	no	conserved hypothetical protein
AFLA_014300	3.11556	0.565688	0.658822	-2.46956	0.0980691	down	no	-2.23628	0.0301227	down	yes	sodium bile acid symporter family protein
AFLA_014310	66.5862	57.7345	42.3187	-0.180059	0.924352	down	no	-0.635409	0.0576706	down	no	acyl-CoA dehydrogenase family protein
AFLA_014320	0.902451	0.491643	0.441194	-0.871594	0.739296	down	no	-1.02286	0.523217	down	no	conserved hypothetical protein
AFLA_014330	3.14357	4.25972	3.2524	0.450889	0.892142	up	no	0.0753414	1	up	no	conserved hypothetical protein
AFLA_014340	2.84506	2.57236	2.5071	-0.124842	0.990549	down	no	-0.17816	0.821351	down	no	conserved hypothetical protein
AFLA_014350	95.469	151.558	115.312	0.635899	0.413103	up	no	0.208285	0.603564	up	no	conserved hypothetical protein
AFLA_014360	193.961	224.166	211.543	0.198261	0.921829	up	no	0.104606	0.845095	up	no	protein phosphatase 2A catalytic subunit Pph21, putative
AFLA_014370	133.855	210.844	384.665	0.582332	0.641877	up	no	1.42335	1.6e-06	up	yes	homogentisate 1,2-dioxygenase, putative
AFLA_014380	5.81041	5.8204	5.53868	-0.0137659	1	down	no	-0.088333	0.944594	down	no	glutamate carboxypeptidase, putative
AFLA_014390	5.2844	4.713	4.0411	-0.189817	0.923424	down	no	-0.410607	0.521563	down	no	efflux pump antibiotic resistance protein, putative
AFLA_014400	4.38862	4.00255	1.89471	-0.2136	1	down	no	-1.32651	0.192504	down	no	conserved hypothetical protein
AFLA_014410	0.581802	0.807518	0.250338	0.247437	1	up	no	-1.39266	0.351365	down	no	conserved hypothetical protein
AFLA_014420	1.28707	0.868099	0.980988	-0.541886	0.814487	down	no	-0.361101	0.723107	down	no	gluconate 5-dehydrogenase, putative
AFLA_014430	0.322211	0.0364237	0.0402547	-3.02835	0.398664	down	no	-2.92783	0.173502	down	no	arylesterase/monoxygenase
AFLA_014440	0.27674	0.26585	0.0835826	-0.0458289	1	down	no	-1.73583	0.504857	down	no	conserved hypothetical protein
AFLA_014450	0.709489	0.271591	2.48697	-1.56009	0.357993	down	no	1.60038	0.42463	up	no	conserved hypothetical protein
AFLA_014460	1.58198	8.15114	1.76328	2.29724	0.00111608	up	yes	0.0891109	0.98057	up	no	dimethylaniline monooxygenase, putative
AFLA_014470	8.99735	16.253	8.06559	0.747755	0.69065	up	no	-0.279615	0.784121	down	no	oxidoreductase, short-chain dehydrogenase/reductase family, putative
AFLA_014480	4.15795	13.6797	4.40487	1.66089	0.0600457	up	no	-0.00331647	1	down	no	3-oxoacyl-[acyl-carrier-protein] reductase, putative
AFLA_014490	2.15078	6.95328	2.98333	1.68965	0.0118902	up	yes	0.466913	0.58945	up	no	conserved hypothetical protein
AFLA_014500	24.7425	112.476	49.9181	2.15603	0.00149757	up	yes	0.937599	0.00252081	up	no	plasma membrane channel protein (Aqy1), putative
AFLA_014510	3.73514	1.12444	18.5102	-1.71715	0.0902327	down	no	2.25668	8.89e-05	up	yes	formate/nitrite transporter family protein, putative
AFLA_014520	0.872196	2.62979	6.23994	1.58882	0.0770124	up	no	2.79976	1.61e-06	up	yes	multicopper oxidase, putative
AFLA_014530	0.797133	0.764593	1.09841	-0.0761292	1	down	no	0.45085	0.737047	up	no	flavohemoprotein, putative
AFLA_014540	9.38364	8.94999	11.5606	-0.0525887	1	down	no	0.291379	0.723026	up	no	acetyltransferase, GNAT family, putative
AFLA_014550	21.916	27.0077	27.2021	0.274033	0.84016	up	no	0.268429	0.604569	up	no	vesicle-mediated transport protein (Imh1), putative
AFLA_014560	0.507203	0.414972	0.526128	-0.328144	1	down	no	0.0901401	1	up	no	hypothetical protein
AFLA_014570	3172.78	4910.21	7021.64	0.539141	0.756377	up	no	1.05372	0.00159833	up	yes	conserved hypothetical protein
AFLA_014580	25.91	25.585	23.6247	-0.0146907	1	down	no	-0.142529	0.709707	down	no	chromatin remodeling complex subunit (Arp5), putative
AFLA_014590	30.387	44.4731	40.7116	0.543988	0.573897	up	no	0.397847	0.387339	up	no	conserved hypothetical protein
AFLA_014600	229.244	265.883	426.898	0.20209	0.878931	up	no	0.857961	0.00179636	up	no	profilin Pfy1, putative
AFLA_014610	13.9421	14.8771	19.1506	0.0782341	1	up	no	0.420779	0.480751	up	no	conserved hypothetical protein
AFLA_014620	33.1604	44.9807	48.6419	0.49134	0.778837	up	no	0.572879	0.271994	up	no	conserved hypothetical protein
AFLA_014630	26.7895	15.5086	15.2071	-0.809249	0.393303	down	no	-0.814192	0.00552784	down	no	DNA-directed RNA polymerase III RPC4, putative
AFLA_014640	42.3221	61.4157	49.8726	0.503239	0.59689	up	no	0.197365	0.631319	up	no	C6 finger domain protein, putative
AFLA_014650	26.7641	17.1204	19.177	-0.680608	0.395203	down	no	-0.5122	0.119754	down	no	G2/mitotic-specific cyclin (Clb3), putative
AFLA_014660	9.2473	8.90304	7.58522	-0.0678693	0.989249	down	no	-0.282087	0.499734	down	no	DEAD/DEAH box helicase, putative
AFLA_014670	12.4437	9.91579	7.84708	-0.318612	0.868342	down	no	-0.646593	0.321662	down	no	hypothetical protein
AFLA_014680	16.2626	25.7878	20.4301	0.681475	0.444989	up	no	0.321624	0.623745	up	no	histidine triad nucleotide binding protein, putative
AFLA_014690	132.808	157.228	155.004	0.277803	0.877316	up	no	0.239631	0.604749	up	no	translocon-associated protein, alpha subunit, putative
AFLA_014700	7.18852	6.98901	9.72953	-0.0195638	1	down	no	0.45799	0.430773	up	no	telomere-binding alpha subunit central domain protein
AFLA_014710	240.552	176.984	191.088	-0.453018	0.672659	down	no	-0.327239	0.248039	down	no	karyopherin alpha subunit, putative
AFLA_014720	14.186	19.6295	15.6678	0.488582	0.616217	up	no	0.137414	0.810994	up	no	nuclear cohesin complex subunit (Psc3), putative
AFLA_014730	33.2995	27.1061	14.7919	-0.270807	0.845761	down	no	-1.16905	0.000120729	down	yes	urease accessory protein UreD
AFLA_014740	11.5486	31.3784	29.7267	1.44768	0.0169571	up	yes	1.32968	6.96e-05	up	yes	conserved hypothetical protein
AFLA_014750	80.6045	41.0824	44.0156	-0.964462	0.161063	down	no	-0.866511	0.00135153	down	no	conserved hypothetical protein
AFLA_014760	43.9569	19.7321	12.4418	-1.19014	0.514836	down	no	-1.79988	3.05e-17	down	yes	rRNA biogenesis protein RRP5, putative
AFLA_014770	9.41064	6.79127	9.34572	-0.440463	0.827037	down	no	0.018921	1	up	no	hypothetical protein
AFLA_014780	17.7015	14.3285	10.4418	-0.306598	0.843125	down	no	-0.742443	0.0505166	down	no	WD repeat protein
AFLA_014790	24.3312	18.2306	15.4815	-0.409258	0.726358	down	no	-0.635073	0.130278	down	no	WD repeat protein
AFLA_014800	102.435	72.273	89.5717	-0.504804	0.598932	down	no	-0.207726	0.510149	down	no	t-complex protein 1, alpha subunit, putative
AFLA_014810	80.6585	75.3638	84.4352	-0.110887	0.977158	down	no	0.0440054	0.961532	up	no	prolyl-tRNA synthetase
AFLA_014820	14.5938	12.8678	7.49331	-0.164265	0.933617	down	no	-0.962848	0.00310673	down	no	conserved hypothetical protein
AFLA_014830	2.41529	6.03851	4.1715	1.33837	0.229654	up	no	0.780363	0.409044	up	no	conserved hypothetical protein
AFLA_014840	65.5347	44.4702	42.8996	-0.561473	0.48373	down	no	-0.604478	0.0366218	down	no	3' exoribonuclease family protein
AFLA_014850	35.768	16.0713	22.2539	-1.18631	0.106569	down	no	-0.702012	0.00756132	down	no	phosphatidylethanolamine methyltransferase Pem1, putative
AFLA_014860	2.924	3.2901	1.46365	0.208248	0.978047	up	no	-0.968832	0.254931	down	no	porphobilinogen deaminase, putative
AFLA_014870	2.68624	1.8137	1.3106	-0.565242	0.869543	down	no	-1.02087	0.667877	down	no	hypothetical protein
AFLA_014880	1.83405	1.27915	0.978309	-0.521713	0.859466	down	no	-0.917143	0.404864	down	no	conserved hypothetical protein
AFLA_014890	59.6038	24.6082	104.849	-1.33956	0.281919	down	no	0.703856	0.430583	up	no	hypothetical protein
AFLA_014900	3.74274	3.43803	6.24149	-0.180182	1	down	no	0.677549	0.417757	up	no	hypothetical protein
AFLA_014910	50.7294	74.0497	69.6957	0.515524	0.535864	up	no	0.404127	0.244501	up	no	nucleotide binding protein Nbp35, putative
AFLA_014920	14.2949	42.7454	38.532	1.6498	0.468711	up	no	1.4915	0.365481	up	no	extracellular aspartic endopeptidase, putative
AFLA_014930	121.665	86.6531	106.731	-0.504642	0.605974	down	no	-0.188086	0.550758	down	no	cofactor for methionyl- and glutamyl-tRNA synthetase, putative
AFLA_014940	47.1605	48.3688	66.7732	0.0208419	1	up	no	0.470572	0.173869	up	no	alcohol dehydrogenase, zinc-containing
AFLA_014950	85.5005	94.6725	121.32	0.189649	0.937246	up	no	0.515522	0.126695	up	no	glycosyltransferase family protein
AFLA_014960	43.456	68.6189	62.1721	0.675337	0.387035	up	no	0.506604	0.132576	up	no	mannan polymerase II complex ANP1 subunit Anp1, putative
AFLA_014970	10.632	8.53352	6.98482	-0.362887	0.793523	down	no	-0.641335	0.14435	down	no	sister chromatid cohesion protein Dcc1, putative
AFLA_014980	39.3938	16.3627	24.265	-1.29331	0.0441467	down	yes	-0.727282	0.0169874	down	no	conserved hypothetical protein
AFLA_014990	11.7855	10.2756	13.3642	-0.200178	0.899865	down	no	0.174167	0.762344	up	no	RING finger protein, putative
AFLA_015000	0.160476	0.0356108	0.228362	-2.20506	0.64279	down	no	0.591431	0.966346	up	no	glutamine synthetase, putative
AFLA_015010	0.492656	0.319288	0.591023	-0.684921	0.876627	down	no	0.211989	0.995726	up	no	conserved hypothetical protein
AFLA_015020	0.0748115	0.0653829	0	-0.318648	1	down	no	#NAME?	0.514912	down	no	conserved hypothetical protein
AFLA_015030	257.943	210.881	208.274	-0.337211	0.820057	down	no	-0.341844	0.243735	down	no	mitotic spindle checkpoint protein (Mad2B), putative
AFLA_015040	15.6191	16.0562	22.0924	0.00742288	1	up	no	0.469789	0.172897	up	no	importin beta-5 subunit, putative
AFLA_015050	9.62771	6.94282	5.61436	-0.450356	0.876886	down	no	-0.772195	0.326091	down	no	methyltransferase family protein
AFLA_015060	70.7746	48.7669	44.3839	-0.534482	0.627716	down	no	-0.708325	0.0158955	down	no	phytanoyl-CoA dioxygenase family protein
AFLA_015070	15.8925	15.6302	23.9743	-0.0278275	1	down	no	0.58823	0.248947	up	no	conserved hypothetical protein
AFLA_015080	4.47929	3.6431	3.70526	-0.305082	0.951924	down	no	-0.248905	0.895986	down	no	hypothetical protein
AFLA_015090	35.8623	18.2745	34.2936	-0.972098	0.146636	down	no	-0.0639715	0.894046	down	no	HET-C domain protein
AFLA_015100	1.01067	5.08995	1.06619	2.29663	0.0873238	up	no	-0.0255708	1	down	no	2-hydroxyacid dehydrogenase, putative
AFLA_015110	17.919	82.8164	28.6331	2.19014	0.0103632	up	yes	0.592996	0.381897	up	no	conserved hypothetical protein
AFLA_015120	2.03671	1.85242	1.79271	-0.204917	0.98672	down	no	-0.264012	0.892476	down	no	2-dehydropantoate 2-reductase family protein, putative
AFLA_015130	0.620495	0.406689	0.673521	-0.594258	0.823838	down	no	0.146269	1	up	no	conserved hypothetical protein
AFLA_015140	0.992517	1.36128	1.15983	0.436186	0.868161	up	no	0.191906	0.938242	up	no	conserved hypothetical protein
AFLA_015150	28.6667	43.494	30.4248	0.57214	0.484695	up	no	0.0243196	1	up	no	conserved hypothetical protein
AFLA_015160	34.2915	51.2879	35.7763	0.534463	0.605772	up	no	-0.0195163	1	down	no	TRAF-like signal transducer, putative
AFLA_015170	74.4184	113.809	88.3397	0.585633	0.515218	up	no	0.177919	0.677891	up	no	SNARE complex subunit (Syn8), putative
AFLA_015180	1139.18	1605.58	884.147	0.434202	0.787659	up	no	-0.463845	0.377338	down	no	conserved hypothetical protein
AFLA_015190	489.778	825.929	658.732	0.724565	0.380036	up	no	0.375915	0.251118	up	no	conserved hypothetical protein
AFLA_015200	19.5303	18.747	14.2297	-0.0815573	1	down	no	-0.510263	0.254781	down	no	C-type cyclin (Fic1), putative
AFLA_015210	73.8261	76.7582	62.1478	0.0329282	1	up	no	-0.28537	0.358042	down	no	calcium dependent mitochondrial carrier protein, putative
AFLA_015220	29.2974	38.307	61.2851	0.314331	0.844479	up	no	0.98446	0.0045509	up	no	cell wall biogenesis protein/glutathione transferase (Gto1), putative
AFLA_015230	47.587	58.572	80.4965	0.269346	0.863822	up	no	0.725972	0.00935537	up	no	poly(A)+ RNA transport protein (UbaA), putative
AFLA_015240	6.13577	6.86426	9.05297	0.151978	0.995676	up	no	0.555753	0.209966	up	no	gamma-tubulin complex component GCP4, putative
AFLA_015250	3.57507	4.29665	3.1143	0.25498	1	up	no	-0.181313	0.958344	down	no	hypothetical protein
AFLA_015260	2.58529	1.4908	0.994979	-0.870549	0.670266	down	no	-1.41672	0.0379635	down	yes	short chain dehydrogenase/oxidoreductase, putative
AFLA_015270	6.88246	8.05527	10.6862	0.220512	0.922167	up	no	0.620088	0.187645	up	no	MFS transporter, putative
AFLA_015280	8.37544	5.92057	2.3182	-0.516693	0.714705	down	no	-1.85491	0.000869098	down	yes	hypothetical protein
AFLA_015290	126.86	94.5938	130.179	-0.473618	0.677266	down	no	-0.0255907	1	down	no	conserved hypothetical protein
AFLA_015300	3.28226	3.05348	7.50849	-0.161939	0.964651	down	no	1.15162	0.0061798	up	yes	L-lactate dehydrogenase, putative
AFLA_015310	16.6626	14.0973	17.6902	-0.252634	0.895777	down	no	0.0486887	0.95887	up	no	hexokinase family protein XprF, putative
AFLA_015320	140.655	270.046	231.761	0.953329	0.184144	up	no	0.694328	0.0296473	up	no	transcription initiation factor iia small chain
AFLA_015330	21.7252	22.3907	29.2481	0.0165468	1	up	no	0.402499	0.376636	up	no	conserved hypothetical protein
AFLA_015340	45.4448	38.8514	48.4759	-0.280777	0.857287	down	no	0.033767	0.949723	up	no	conserved hypothetical protein
AFLA_015350	20.7048	27.5222	57.2301	0.396629	0.73637	up	no	1.4447	3.14e-06	up	yes	aldehyde dehydrogenase family protein, putative
AFLA_015360	6.59139	9.83567	17.5564	0.52287	0.585708	up	no	1.3537	5.06e-05	up	yes	N-methyltransferase, putative
AFLA_015370	80.8792	89.0966	92.2846	0.112667	0.97019	up	no	0.152401	0.782345	up	no	DUF92 domain protein
AFLA_015380	29.2283	36.4281	32.5367	0.265181	0.831488	up	no	0.0915962	0.930705	up	no	pyruvate formate lyase activating enzyme, putative
AFLA_015390	13.2116	8.16481	8.4548	-0.692811	0.38193	down	no	-0.647802	0.0472149	down	no	C6 transcription factor, putative
AFLA_015400	24.1831	26.2865	21.4098	0.100725	1	up	no	-0.180022	0.632031	down	no	mitochondrial DNA-directed RNA polymerase, putative
AFLA_015410	35.6568	20.1037	25.5213	-0.807953	0.338583	down	no	-0.46764	0.190101	down	no	conserved hypothetical protein
AFLA_015420	39.4556	50.1175	36.8244	0.346578	0.956493	up	no	-0.0771375	0.848364	down	no	sulfite reductase, putative
AFLA_015430	147.821	226.137	147.413	0.582551	0.472406	up	no	-0.077128	0.981575	down	no	conserved hypothetical protein
AFLA_015440	109.196	172.896	178.216	0.674638	0.419916	up	no	0.679958	0.0228411	up	no	RAS small monomeric GTPase Rab6, putative
AFLA_015450	156.544	247.472	259.064	0.659465	0.393799	up	no	0.701468	0.0174361	up	no	V-ATPase proteolipid subunit Ppa1, putative
AFLA_015460	22.6712	15.1999	24.8029	-0.581929	0.563083	down	no	0.137833	0.820405	up	no	molybdopterin biosynthesis protein, putative
AFLA_015470	18.2237	23.5981	21.8221	0.295629	0.848702	up	no	0.186918	0.733573	up	no	DDHD domain protein
AFLA_015480	4.97803	5.64053	6.63567	0.132872	0.995495	up	no	0.372019	0.52713	up	no	conserved hypothetical protein
AFLA_015490	6.38102	7.09485	5.59736	0.163595	0.964651	up	no	-0.188725	0.71005	down	no	FAD monooxygenase, putative
AFLA_015500	49.7441	50.4235	69.685	0.0113699	1	up	no	0.444852	0.273448	up	no	DUF866 domain protein
AFLA_015510	398.273	342.204	396.537	-0.209403	0.907926	down	no	-0.0187896	0.961317	down	no	small nuclear ribonucleoprotein SmF, putative
AFLA_015520	2.98593	4.63785	9.89131	0.615158	0.716439	up	no	1.69005	0.00504931	up	yes	hypothetical protein
AFLA_015530	4.46644	8.15766	4.71262	0.804333	0.426073	up	no	0.000566926	1	up	no	conserved hypothetical protein
AFLA_015540	4.13378	5.74228	2.41692	0.334347	0.890012	up	no	-0.852895	0.317598	down	no	amino acid transporter, putative
AFLA_015550	41.7693	44.1052	33.4034	0.0788448	1	up	no	-0.343008	0.292077	down	no	MFS sugar transporter, putative
AFLA_015560	4.64591	3.98523	2.60176	-0.250584	0.951924	down	no	-0.855157	0.36765	down	no	hypothetical protein
AFLA_015570	3.58974	4.65775	2.00323	0.338194	0.886006	up	no	-0.883178	0.300432	down	no	conserved hypothetical protein
AFLA_015580	327.992	480.843	464.398	0.503204	0.727315	up	no	0.415971	0.391904	up	no	sorbitol/xylulose reductase Sou1-like, putative
AFLA_015590	8.78637	14.3282	13.906	0.681763	0.393303	up	no	0.616852	0.147361	up	no	conserved hypothetical protein
AFLA_015600	27.3729	50.5405	45.9539	0.846015	0.266525	up	no	0.678721	0.0365262	up	no	MFS transporter family protein, putative
AFLA_015610	8.84825	15.187	20.9814	0.729099	0.394164	up	no	1.1892	0.00225025	up	yes	conserved hypothetical protein
AFLA_015620	1.88549	4.02674	8.43277	1.03387	0.349915	up	no	2.10919	0.000106315	up	yes	conserved hypothetical protein
AFLA_015630	34.6703	50.7412	39.2825	0.54209	0.575483	up	no	0.127896	0.7981	up	no	conserved hypothetical protein
AFLA_015640	2.14763	3.6648	1.85973	0.77102	0.437905	up	no	-0.252212	0.790522	down	no	kinesin, putative
AFLA_015650	14.4781	10.2288	8.47942	-0.548745	0.586273	down	no	-0.817152	0.0257434	down	no	MFS drug transporter, putative
AFLA_015660	0.19699	0.485537	1.2632	1.25311	0.557005	up	no	2.58562	0.00878836	up	yes	choline transport protein, putative
AFLA_015670	20.2354	27.5649	16.5997	0.460185	0.652975	up	no	-0.3097	0.41728	down	no	vacuolar segregation protein (Pep7), putative
AFLA_015680	33.924	38.8463	16.0719	0.208867	0.893668	up	no	-1.11203	3.5e-05	down	yes	conserved hypothetical protein
AFLA_015690	239.03	236.156	224.886	-0.080777	1	down	no	-0.164925	0.677916	down	no	conserved hypothetical protein
AFLA_015700	84.5877	123.531	72.2802	0.507199	0.590119	up	no	-0.30062	0.435473	down	no	ribulose-phosphate 3-epimerase
AFLA_015710	22.6217	22.2892	11.6144	-0.0221533	1	down	no	-1.00075	0.00275311	down	yes	conserved hypothetical protein
AFLA_015720	55.1151	51.4105	81.4652	-0.0842632	1	down	no	0.561604	0.120124	up	no	small nuclear ribonucleoprotein (LSM2), putative
AFLA_015730	18.0124	24.2601	18.2613	0.432002	0.697154	up	no	0.0151256	0.998934	up	no	DNA repair protein Pso2/Snm1, putative
AFLA_015740	10.0045	12.3761	9.47074	0.311242	0.806946	up	no	-0.11139	0.844282	down	no	cytochrome P450 benzoate 4-monooxygenase, putative
AFLA_015750	0.869021	1.29999	1.50747	0.628112	0.83537	up	no	0.797289	0.565372	up	no	conserved hypothetical protein
AFLA_015760	2.14907	3.02259	8.12599	0.467702	0.772244	up	no	1.87735	0.000976833	up	yes	oligomycin resistance ATP-dependent permease yor1, putative
AFLA_015770	2.20741	2.15925	5.62124	-0.040431	1	down	no	1.30547	0.0293147	up	yes	ABC transporter, putative
AFLA_015780	13.8415	15.5335	49.3656	0.216881	0.97564	up	no	1.84621	0.187793	up	no	small oligopeptide transporter, OPT family
AFLA_015790	4.91794	3.6082	4.66024	-0.470771	0.72588	down	no	-0.113589	0.967639	down	no	C6 transcription factor (Leu3), putative
AFLA_015800	228.049	199.368	364.61	-0.228804	0.899433	down	no	0.627892	0.0273568	up	no	DUF636 domain protein
AFLA_015810	1.41908	1.42032	1.54018	-0.0379266	1	down	no	0.0657005	0.987693	up	no	citrate synthase, putative
AFLA_015820	1.21359	1.21386	1.17851	0.0149762	1	up	no	-0.0288735	1	down	no	hypothetical protein
AFLA_015830	0.964329	1.11405	0.563641	0.106398	1	up	no	-0.860489	0.378113	down	no	MFS efflux transporter, putative
AFLA_015840	0	0.139267	0.207223	Inf	0.832354	up	no	Inf	0.49657	up	no	conserved hypothetical protein
AFLA_015850	0.347128	0.369861	0.447456	0.104294	1	up	no	0.376332	0.839696	up	no	AflR-like C6 transcription factor, putative
AFLA_015860	0.493765	0.846504	0.884283	0.854157	0.830027	up	no	0.898872	0.623436	up	no	aconitase, putative
AFLA_015870	0.419852	0.202095	0.0718339	-0.903924	1	down	no	-2.42983	0.407496	down	no	conserved hypothetical protein
AFLA_015880	3.22877	2.04213	1.47642	-0.633025	0.664141	down	no	-1.12393	0.0422186	down	yes	ATP-binding cassette transporter, putative
AFLA_015890	17.1837	8.94746	33.3064	-0.921461	0.243679	down	no	0.957086	0.00596833	up	no	C2H2 finger domain protein, putative
AFLA_015900	0.2308	0.187747	0.172579	-0.336169	1	down	no	-0.431031	0.953256	down	no	carboxyphosphonoenolpyruvate mutase, putative
AFLA_015910	0.717308	0.119069	0.338066	-2.68074	0.462809	down	no	-1.08871	0.610043	down	no	MFS transporter, putative
AFLA_015920	5.74311	1.51021	1.47361	-1.91021	0.00992175	down	yes	-1.9664	0.000776702	down	yes	C6 transcription factor Aro80, putative
AFLA_015930	17.4557	24.6901	14.1776	0.495883	0.614874	up	no	-0.333365	0.595486	down	no	NAD dependent epimerase/dehydratase, putative
AFLA_015940	0.0332499	0	0.0379211	#NAME?	1	down	no	-0.0521554	1	down	no	6-hydroxy-D-nicotine oxidase, putative
AFLA_015950	0	0.0625534	0.121677	Inf	1	up	no	Inf	0.71005	up	no	hypothetical protein
AFLA_015960	0	0.0875747	0.0851737	Inf	1	up	no	Inf	1	up	no	hypothetical protein
AFLA_015970	0.535185	0.543041	1.38874	-0.0383626	1	down	no	1.29959	0.174394	up	no	1-aminocyclopropane-1-carboxylate oxidase, putative
AFLA_015980	0.939988	1.29508	1.10611	0.384412	0.937246	up	no	0.149047	0.976465	up	no	conserved hypothetical protein
AFLA_015990	0.0984087	0	0.0915089	#NAME?	1	down	no	-0.0715377	1	down	no	hypothetical protein
AFLA_016000	0.0198121	0.0408902	0	0.861749	1	up	no	#NAME?	1	down	no	DUF895 domain membrane protein
AFLA_016010	0.861816	0.819616	1.30769	-0.064837	1	down	no	0.550778	0.649404	up	no	short-chain dehydrogenase, putative
AFLA_016020	25.5792	4.34354	1.34031	-2.54988	0.00297411	down	yes	-4.2491	0.000930141	down	yes	hscarg dehydrogenase, putative
AFLA_016030	13.4072	10.6619	8.23967	-0.353737	0.848568	down	no	-0.749271	0.132547	down	no	conserved hypothetical protein
AFLA_016040	0.666214	1.49413	0.943236	1.22173	0.56884	up	no	0.504925	0.814765	up	no	conserved hypothetical protein
AFLA_016050	0.830348	2.51437	2.63996	1.58378	0.0995177	up	no	1.63962	0.0124026	up	yes	polysaccharide export protein (CAP59), putative
AFLA_016060	7.00251	10.4284	8.07177	0.553404	0.67656	up	no	0.152842	0.865386	up	no	conserved hypothetical protein
AFLA_016070	0.189579	0.63468	0.235274	1.77908	0.377189	up	no	0.295148	1	up	no	oxidoreductase, short chain dehydrogenase/reductase family, putative
AFLA_016090	0.140524	0.262069	0.430448	0.760996	0.938402	up	no	1.45435	0.425068	up	no	conserved hypothetical protein
AFLA_016110	0	0	0.086355					Inf	0.675312	up	no	glucose dehydrogenase, putative
AFLA_016120	19.445	37.0003	87.5396	0.869006	0.411511	up	no	2.08001	5.09e-06	up	yes	O-methyltransferase family protein
AFLA_016130	22.5009	43.1496	119.459	0.896043	0.224124	up	no	2.3421	1.6e-10	up	yes	hypothetical protein
AFLA_016140	121.139	104.97	287.495	-0.238293	0.987341	down	no	1.17252	6.94e-05	up	yes	conidial pigment biosynthesis scytalone dehydratase Arp1
AFLA_016150	1.83685	0.555307	1.52508	-1.79346	0.0995177	down	no	-0.326964	0.831166	down	no	lipase, putative
AFLA_016160	60.9897	23.4567	19.5894	-1.47515	0.102755	down	no	-1.72306	5.3e-12	down	yes	conserved hypothetical protein
AFLA_016170	10.5321	9.52399	10.5041	-0.192595	0.940939	down	no	-0.025143	0.992335	down	no	AMP dependent CoA ligase, putative
AFLA_016180	9.38335	10.2024	10.1017	0.0289078	1	up	no	0.0505385	0.966525	up	no	hypothetical protein
AFLA_016190	3.42392	3.32013	3.7497	-0.0605966	1	down	no	0.115814	0.947838	up	no	conserved hypothetical protein
AFLA_016200	0.890522	0.387905	0.604703	-1.18778	0.536395	down	no	-0.582096	0.626223	down	no	bypass of stop codon protein, putative
AFLA_016210	2.44794	3.20694	4.91372	0.369849	0.835333	up	no	0.963936	0.105842	up	no	arabinosidase, putative
AFLA_016220	1.08412	0.8073	1.70706	-0.452757	0.974164	down	no	0.568617	0.565257	up	no	conserved hypothetical protein
AFLA_016230	0.120684	0.130547	0	0.196573	1	up	no	#NAME?	0.501561	down	no	cortactin-binding protein, putative
AFLA_016240	0.320989	0.320765	0.36403	0.0490008	1	up	no	0.169394	1	up	no	conserved hypothetical protein
AFLA_016250	1.90123	2.86478	3.37253	0.508097	0.793427	up	no	0.718044	0.30841	up	no	conserved hypothetical protein
AFLA_016260	3.7193	5.45586	4.34926	0.494015	0.716439	up	no	0.133429	0.839696	up	no	kinesin light chain, putative
AFLA_016270	0.23044	0.0783954	0	-1.54389	0.961503	down	no	#NAME?	0.514912	down	no	hypothetical protein
AFLA_016280	5.08963	1.2599	2.69461	-2.01151	0.0958253	down	no	-0.909177	0.470154	down	no	conserved hypothetical protein
AFLA_016290	7.11154	4.57923	6.5372	-0.72834	0.64117	down	no	-0.23904	0.801185	down	no	zinc alcohol dehydrogenase, putative
AFLA_016300	17.7969	14.3265	8.23767	-0.350892	0.962045	down	no	-1.07499	0.279582	down	no	FMN binding oxidoreductase, putative
AFLA_016310	0.257449	0.0441705	0.0488164	-2.43473	0.664629	down	no	-2.3322	0.409049	down	no	conserved hypothetical protein
AFLA_016320	3.68301	1.52154	0.988294	-1.33059	0.202211	down	no	-1.97361	0.000779103	down	yes	ToxD-like zinc binding oxidoreductase, putative
AFLA_016330	6.82705	5.27581	9.07444	-0.533777	0.943825	down	no	0.301288	0.898794	up	no	alpha/beta fold family hydrolase, putative
AFLA_016340	18.4103	8.48473	7.40525	-1.21969	0.34811	down	no	-1.46984	0.385697	down	no	conserved hypothetical protein
AFLA_016350	12.6677	2.10683	1.32189	-2.79232	0.315625	down	no	-3.42049	0.0462396	down	yes	NAD(P)H-dependent FMN reductase LOT6, putative
AFLA_016360	61.772	80.7303	107.589	0.355527	0.828226	up	no	0.721001	0.0350559	up	no	PAF acetylhydrolase family protein
AFLA_016370	0.0421736	0.077617	0.063024	0.597567	1	up	no	0.317535	1	up	no	dimethylaniline monooxygenase, putative
AFLA_016380	0.0650586	0.0661607	0.0630916	0.138818	1	up	no	-0.0333335	1	down	no	alcohol dehydrogenase, putative
AFLA_016390	0.964991	0.299933	0.189076	-1.73015	0.264219	down	no	-2.40769	0.160958	down	no	MFS transporter, putative
AFLA_016400	158.104	186.088	371.424	0.156961	0.970082	up	no	1.14796	0.00011963	up	yes	glutathione S-transferase, putative
AFLA_016410	1.72817	1.42511	0.530328	-0.239266	0.964651	down	no	-1.61912	0.263879	down	no	hypothetical protein
AFLA_016430	0.353301	0.0432879	0.14159	-2.96832	0.447642	down	no	-1.3449	0.550758	down	no	sugar transporter, putative
AFLA_016440	0.0554165	0.318353	0.838075	2.27607	0.669049	up	no	3.68556	0.0480826	up	yes	conserved hypothetical protein
AFLA_016450	0	0	0.0934485					Inf	1	up	no	conserved hypothetical protein
AFLA_016460	0	0	0.100637					Inf	1	up	no	hypothetical protein
AFLA_016490	0.0451165	0.0228969	0.116926	-0.860154	1	down	no	1.43662	0.709707	up	no	cytochrome P450, putative
AFLA_016500	3.14119	1.86633	1.50553	-0.775763	0.737778	down	no	-1.06256	0.546127	down	no	hypothetical protein
AFLA_016510	3.43529	1.84758	1.71418	-0.939869	0.564975	down	no	-1.04529	0.417026	down	no	hypothetical protein
AFLA_016520	2.16009	0.593054	0.0709937	-1.9817	0.276695	down	no	-5.02157	0.000315758	down	yes	thioesterase family protein
AFLA_016530	0.637316	0.557827	0.286772	-0.265765	0.946855	down	no	-1.22253	0.120352	down	no	beta-galactosidase, putative
AFLA_016540	1.97073	4.28445	3.12757	1.12358	0.19294	up	no	0.644071	0.24129	up	no	conserved hypothetical protein
AFLA_016550	7.56401	7.32147	8.48646	-0.0761738	1	down	no	0.105322	0.931524	up	no	conserved hypothetical protein
AFLA_016560	57.5627	51.4133	59.9015	-0.148048	0.931848	down	no	0.0588066	0.941659	up	no	methionyl-tRNA synthetase
AFLA_016570	38.9287	19.9465	18.3351	-1.06957	0.28479	down	no	-1.21816	0.0378921	down	yes	epoxide hydrolase, putative
AFLA_016580	44.5275	18.5655	6.34956	-1.24542	0.178013	down	no	-2.79831	5.84e-05	down	yes	conserved hypothetical protein
AFLA_016590	89.5576	31.9968	16.2451	-1.4543	0.211773	down	no	-2.42616	0.001746	down	yes	hypothetical protein
AFLA_016600	108.677	45.9815	22.182	-1.21444	0.165753	down	no	-2.26493	0.000359266	down	yes	conserved hypothetical protein
AFLA_016610	11.9155	17.2038	9.05948	0.44991	0.771221	up	no	-0.477374	0.653212	down	no	conserved hypothetical protein
AFLA_016620	89.6192	57.6166	74.153	-0.684326	0.510376	down	no	-0.353747	0.643485	down	no	tryptophanyl-tRNA synthetase, putative
AFLA_016630	12.3577	15.1408	13.5338	0.318129	0.835779	up	no	0.133307	0.873306	up	no	transcription initiation factor TFIID subunit 7, putative
AFLA_016640	25.3965	32.2495	28.8949	0.362982	0.767521	up	no	0.170893	0.826869	up	no	hypothetical protein
AFLA_016650	13.5335	16.8444	19.8289	0.297884	0.821802	up	no	0.516586	0.227117	up	no	pH-signaling protein PalC
AFLA_016660	355.883	592.956	443.055	0.732899	0.330916	up	no	0.279033	0.410829	up	no	NADH-ubiquinone oxidoreductase 12 kda subunit, putative
AFLA_016670	54.1674	42.1751	52.5379	-0.392215	0.700596	down	no	-0.0682562	0.870734	down	no	alpha-1,6-mannosyltransferase subunit, putative
AFLA_016680	0.800445	0.632484	0.489277	-0.269648	1	down	no	-0.741304	0.921253	down	no	hypothetical protein
AFLA_016690	2.01844	4.58168	4.2177	1.15578	0.350569	up	no	0.987661	0.254107	up	no	hypothetical protein
AFLA_016700	25.5276	22.8142	16.6828	-0.168861	0.894144	down	no	-0.613129	0.0429887	down	no	protein kinase, putative
AFLA_016710	2.69538	1.86328	3.04616	-0.517105	0.861574	down	no	0.165905	0.96293	up	no	conserved hypothetical protein
AFLA_016720	1.95581	0.605982	1.32681	-1.72878	0.461092	down	no	-0.587975	0.72995	down	no	translationally controlled tumor protein, putative
AFLA_016730	22.4257	24.179	46.4496	0.0739583	1	up	no	1.00643	0.00172402	up	yes	alanine racemase
AFLA_016740	30.7835	34.2656	31.8807	0.152738	0.978889	up	no	0.0486134	1	up	no	conserved hypothetical protein
AFLA_016750	11.5325	5.89849	4.89927	-0.973066	0.515218	down	no	-1.2069	0.000672024	down	yes	exonuclease, putative
AFLA_016760	3.12389	3.46222	4.00831	0.0324047	1	up	no	0.254992	0.81593	up	no	NmrA-like family protein
AFLA_016770	2.55177	1.93903	3.56619	-0.440581	0.899125	down	no	0.415167	0.650859	up	no	hypothetical protein
AFLA_016780	0.684594	0.545099	0.345621	-0.414858	0.909251	down	no	-1.04324	0.555254	down	no	conserved hypothetical protein
AFLA_016790	1.43428	1.3427	0.67063	-0.201404	0.953501	down	no	-1.19873	0.0384368	down	yes	hypothetical protein
AFLA_016800	273.483	257.08	215.531	-0.144033	0.984587	down	no	-0.406267	0.232155	down	no	thioredoxin, putative
AFLA_016810	38.6717	33.4567	31.7569	-0.180582	0.920673	down	no	-0.275618	0.458179	down	no	Gamma-butyrobetaine hydroxylase subfamily, putative
AFLA_016820	32.4803	33.9759	29.9552	0.0553554	1	up	no	-0.143308	0.753011	down	no	mitochondrial deoxynucleotide carrier protein, putative
AFLA_016830	138.103	151.083	247.176	0.0518939	1	up	no	0.755742	0.00795483	up	no	tubulin subunit TubB
AFLA_016840	33.6823	36.6688	29.9449	0.105644	1	up	no	-0.162035	0.611254	down	no	Mechanosensitive ion channel family
AFLA_016850	36.6409	30.3824	31.3265	-0.293107	0.833888	down	no	-0.251637	0.575549	down	no	hypothetical protein
AFLA_016860	2.06248	2.0172	0.916932	-0.103189	1	down	no	-1.22458	0.0372724	down	yes	GMC oxidoreductase, putative
AFLA_016870	64.0365	69.8771	53.6621	0.125766	0.962045	up	no	-0.276599	0.39847	down	no	C-3 sterol dehydrogenase/C-4 decarboxylase
AFLA_016880	4.32082	3.41788	2.67622	-0.421237	0.85817	down	no	-0.796264	0.591971	down	no	ubiquitin conjugating enzyme, putative
AFLA_016890	8.36226	8.95854	10.0767	0.111662	1	up	no	0.273049	0.566934	up	no	Rho GTPase activator (Lrg11), putative
AFLA_016900	24.3641	27.2455	24.0263	0.184594	0.955431	up	no	-0.0110001	0.967639	down	no	conserved hypothetical protein
AFLA_016910	111.856	147.499	158.455	0.388088	0.699274	up	no	0.467767	0.146485	up	no	26S proteasome regulatory subunit S5A
AFLA_016920	23.1382	28.6107	23.7875	0.321858	0.810772	up	no	0.0249244	1	up	no	Sybindin-like family protein
AFLA_016930	1.57181	29.7299	41.2198	4.25738	2.77e-14	up	yes	4.68137	5.72e-26	up	yes	O-methyltransferase, putative
AFLA_016940	55.5886	45.4856	35.2295	-0.2565	0.880017	down	no	-0.651828	0.0365262	down	no	enoyl-CoA hydratase/isomerase family protein
AFLA_016950	265.775	408.069	335.038	0.587717	0.482036	up	no	0.273557	0.38314	up	no	SNARE protein Snc2, putative
AFLA_016960	102.86	137.962	92.89	0.388078	0.75371	up	no	-0.189872	0.598193	down	no	acetylglutamate kinase, putative
AFLA_016970	4.58331	8.79039	2.24913	0.905741	0.382786	up	no	-1.01954	0.0197696	down	yes	Rad21/Rec8 N terminal domain protein
AFLA_016980	5.10752	5.53681	4.33646	0.136866	0.970222	up	no	-0.264526	0.776578	down	no	conserved hypothetical protein
AFLA_016990	615.609	299.12	261.198	-1.05186	0.123161	down	no	-1.24163	3.18e-09	down	yes	fibrillarin
AFLA_017000	11.0645	8.00733	9.82653	-0.530976	0.676624	down	no	-0.234766	0.754261	down	no	nucleoside-diphosphate-sugar epimerase, putative
AFLA_017010	336.344	349.819	275.357	0.037355	1	up	no	-0.323544	0.27342	down	no	mitochondrial processing peptidase beta subunit, putative
AFLA_017020	77.3662	52.0181	154.005	-0.642523	0.543763	down	no	0.923709	0.00731458	up	no	DUF614 domain protein
AFLA_017030	4.2003	1.60162	1.86838	-1.35567	0.1784	down	no	-1.16719	0.0448379	down	yes	conserved hypothetical protein
AFLA_017040	2.06849	1.49068	1.41925	-0.438144	0.811423	down	no	-0.540921	0.444752	down	no	C6 transcription factor, putative
AFLA_017050	0.547765	0.304267	0.196258	-0.86147	0.716866	down	no	-1.49926	0.243206	down	no	sugar transporter, putative
AFLA_017060	0.397541	0	0.161743	#NAME?	0.293679	down	no	-1.20837	0.568697	down	no	conserved hypothetical protein
AFLA_017070	1.00681	1.14614	0.928053	0.164742	0.963859	up	no	-0.153059	0.893925	down	no	sterol glucosyltransferase, putative
AFLA_017080	0.0767291	0.359676	0.0935825	2.14543	0.2464	up	no	0.162772	1	up	no	isoamyl alcohol oxidase, putative
AFLA_017090	58.0166	34.4304	31.594	-0.746377	0.341238	down	no	-0.861497	0.000429741	down	no	methyltransferase (Ncl1), putative
AFLA_017100	7.34033	6.85049	3.17276	-0.165248	0.991398	down	no	-1.29704	0.000536448	down	yes	beta-galactosidase, putative
AFLA_017110	14.7094	19.6071	8.92878	0.423595	0.737029	up	no	-0.742855	0.218981	down	no	conserved hypothetical protein
AFLA_017120	253.97	600.176	363.175	1.2245	0.0703404	up	no	0.46017	0.141098	up	no	UV-induced protein uvi15, putative
AFLA_017130	122.944	119.93	107.663	-0.0268913	1	down	no	-0.194067	0.540644	down	no	nuclear segregation protein (Bfr1), putative
AFLA_017140	40.549	28.3777	34.9116	-0.525243	0.661935	down	no	-0.234409	0.690477	down	no	DNA-directed RNA polymerase II, putative
AFLA_017150	105.291	80.6706	79.6248	-0.391719	0.731346	down	no	-0.422218	0.185276	down	no	RNA polymerase subunit
AFLA_017160	5.3004	2.12012	2.07676	-1.39306	0.0845134	down	no	-1.41118	0.00269758	down	yes	integral membrane protein Pth11-like, putative
AFLA_017170	25.2845	36.9035	38.9019	0.532233	0.551666	up	no	0.569804	0.0938781	up	no	histidinol-phosphate aminotransferase
AFLA_017180	0.647522	0.441362	0.766894	-0.557553	0.869543	down	no	0.230944	0.942874	up	no	pectin lyase A precursor, putative
AFLA_017190	31.8615	50.1708	41.9228	0.628668	0.435022	up	no	0.356796	0.338895	up	no	hypothetical protein
AFLA_017200	17.0924	26.0814	16.6329	0.621127	0.433313	up	no	-0.0598935	0.905394	down	no	chromosome segregation protein BIR1, putative
AFLA_017210	65.2288	76.1647	60.8266	0.202181	0.879104	up	no	-0.141711	0.736238	down	no	C2H2 finger domain protein, putative
AFLA_017220	174.973	233.199	253.291	0.299459	0.927807	up	no	0.419358	0.649404	up	no	pyridoxal-dependent decarboxylase domain protein
AFLA_017230	1.13071	0.81514	2.03051	-0.503608	1	down	no	0.749077	0.516472	up	no	conserved hypothetical protein
AFLA_017240	0.160999	0.0814822	0.177002	-1.15488	0.923424	down	no	-0.0877829	1	down	no	catecholamine-O-methyltransferase, putative
AFLA_017250	0.0730111	0.0434724	0.0402276	-0.876649	1	down	no	-0.940489	0.894332	down	no	FAD monooxygenase, putative
AFLA_017260	0.0740967	0.149491	0.13721	1.02854	0.8535	up	no	0.856314	0.890533	up	no	solid-state culture specific ATP-grasp domain protein
AFLA_017270	0.0845762	0.172018	0.731527	1.13882	1	up	no	3.17288	0.194286	up	no	conserved hypothetical protein
AFLA_017280	113.088	177.362	209.834	0.629342	0.681197	up	no	0.827007	0.0150472	up	no	F-box domain protein
AFLA_017290	2.74515	2.25612	2.76693	-0.28629	0.937246	down	no	-0.0382211	1	down	no	conserved hypothetical protein
AFLA_017300	22.4557	10.7068	6.58131	-1.08901	0.128783	down	no	-1.81229	1.56e-05	down	yes	cytochrome P450 oxidoreductase OrdA-like, putative
AFLA_017310	1.33207	0.189745	0.202332	-2.68536	0.588915	down	no	-2.62031	0.329792	down	no	hypothetical protein
AFLA_017320	0.35278	0.117706	0.19254	-1.6963	0.848568	down	no	-0.86989	0.894046	down	no	conserved hypothetical protein
AFLA_017330	50.7814	67.3138	75.0176	0.384173	0.679525	up	no	0.513008	0.119234	up	no	DUF292 domain protein
AFLA_017340	5.56341	8.94208	12.4898	0.682039	0.456362	up	no	1.1435	0.0216024	up	yes	MFS transporter, putative
AFLA_017350	2.96677	4.89011	6.55206	0.705355	0.45013	up	no	1.10776	0.011744	up	yes	conserved hypothetical protein
AFLA_017360	13.4297	20.5832	23.5277	0.58608	0.565903	up	no	0.778066	0.0691787	up	no	NAD dependent epimerase/dehydratase, putative
AFLA_017370	40.5351	70.4104	77.6311	0.830873	0.299071	up	no	0.9393	0.0121889	up	no	AP-2 adaptor complex subunit sigma, putative
AFLA_017380	60.2259	65.2918	66.7609	0.114831	0.974632	up	no	0.128016	0.83726	up	no	conserved hypothetical protein
AFLA_017390	55.8465	28.6006	58.9996	-0.949442	0.209886	down	no	0.0907185	0.947799	up	no	diphthine synthase, putative
AFLA_017400	41.1001	44.0851	52.1669	0.0960691	0.977205	up	no	0.314712	0.446969	up	no	SAGA-like transcriptional regulatory complex subunit Spt3, putative
AFLA_017410	450.144	522.812	209.093	0.158215	0.934113	up	no	-1.16249	0.032403	down	yes	blue light-inducible protein Bli-3
AFLA_017420	5.06806	8.04982	7.10786	0.564529	0.792184	up	no	0.380983	0.702776	up	no	conserved hypothetical protein
AFLA_017430	111.279	84.0426	95.7879	-0.508362	0.717743	down	no	-0.331343	0.339811	down	no	conserved hypothetical protein
AFLA_017440	4.00575	1.57564	1.00106	-1.39212	0.3468	down	no	-2.07334	0.0885651	down	no	hypothetical protein
AFLA_017450	0.628177	0.502809	0.262558	-0.591497	1	down	no	-1.4623	0.688027	down	no	hypothetical protein
AFLA_017460	2.39098	2.43662	3.12916	-0.0981679	1	down	no	0.239494	0.865883	up	no	conserved hypothetical protein
AFLA_017470	0.265944	0.180019	0	-0.550831	1	down	no	#NAME?	0.514912	down	no	hypothetical protein
AFLA_017480	14.1588	22.9442	21.9079	0.651656	0.467486	up	no	0.591998	0.121276	up	no	SUN domain protein (Adg3), putative
AFLA_017490	10.8277	14.8314	18.9122	0.408289	0.805988	up	no	0.768505	0.182917	up	no	conserved hypothetical protein
AFLA_017500	20.0535	29.247	38.7096	0.522796	0.552862	up	no	0.907443	0.00888001	up	no	Leucine carboxyl methyltransferase superfamily
AFLA_017510	5.08423	3.58901	4.59519	-0.513155	0.67635	down	no	-0.136496	0.780852	down	no	RING zinc finger protein, putative
AFLA_017520	10.9667	11.842	12.3424	0.117817	0.989381	up	no	0.163314	0.816177	up	no	TFIIH complex helicase Rad3, putative
AFLA_017530	53.7121	29.1929	20.3114	-0.908974	0.500134	down	no	-1.39192	8.82e-11	down	yes	DNA-directed RNA polymerase I subunit (Rpa190), putative
AFLA_017540	28.2964	24.9062	24.9611	-0.172535	0.91244	down	no	-0.178738	0.653696	down	no	U4/U6 small nuclear ribonucleoprotein, putative
AFLA_017550	36.4109	31.3354	24.6677	-0.229276	0.889256	down	no	-0.550812	0.0588792	down	no	snoRNP assembly factor Naf1, putative
AFLA_017560	5.78639	10.3243	8.94303	0.856845	0.315399	up	no	0.634497	0.203146	up	no	alpha-1,2-mannosyltransferase (Alg9), putative
AFLA_017570	5.28873	8.08149	4.3068	0.559204	0.638544	up	no	-0.337955	0.615358	down	no	conserved hypothetical protein
AFLA_017580	25.9741	63.3584	45.2762	1.26456	0.0255799	up	yes	0.751434	0.0548289	up	no	conserved hypothetical protein
AFLA_017590	44.7917	111.877	82.5719	1.28809	0.0209741	up	yes	0.816562	0.00575522	up	no	integral membrane protein, Mpv17/PMP22 family, putative
AFLA_017600	136.035	257.074	300.264	0.847214	0.380015	up	no	1.08479	5.23e-05	up	yes	MFS multidrug transporter, putative
AFLA_017610	6065.7	7976.75	7417.56	0.365665	0.843125	up	no	0.234756	0.608854	up	no	histone H3
AFLA_017620	3698.37	5712.17	6552.31	0.612512	0.578535	up	no	0.780703	0.0128678	up	no	histone H4.1
AFLA_017630	7.32598	6.34733	5.92195	-0.295092	0.955102	down	no	-0.380267	0.769184	down	no	hypothetical protein
AFLA_017640	484.247	660.684	411.467	0.407366	0.756377	up	no	-0.301212	0.597498	down	no	C2H2 transcription factor (Rpn4), putative
AFLA_017650	6.81489	11.0366	8.75149	0.644384	0.637242	up	no	0.324815	0.71005	up	no	hypothetical protein
AFLA_017660	10.6844	13.639	15.9718	0.307333	0.883676	up	no	0.543419	0.440225	up	no	hypothetical protein
AFLA_017670	11.278	6.28397	5.77774	-0.880708	0.557842	down	no	-1.01251	0.172757	down	no	hypothetical protein
AFLA_017680	20.9306	34.8592	23.8298	0.729969	0.367154	up	no	0.169938	0.64305	up	no	pentafunctional polypeptide (AroM), putative
AFLA_017690	16.4929	11.6889	8.64554	-0.494914	0.589856	down	no	-0.926182	0.00137226	down	no	5'->3' exoribonculease Dhp1
AFLA_017700	14.1867	15.2995	18.1671	0.116265	1	up	no	0.356608	0.36017	up	no	intracellular protein transport protein (UsoA), putative
AFLA_017710	81.2441	56.4849	62.5643	-0.519559	0.561059	down	no	-0.378927	0.185139	down	no	isoleucyl-tRNA synthetase ,cytoplasmic
AFLA_017720	8.0426	7.01257	5.79894	-0.173052	0.927807	down	no	-0.456447	0.231406	down	no	centrin-binding protein Sfi1, putative
AFLA_017730	21.8898	23.5674	23.8913	0.0507218	1	up	no	0.0680845	0.94268	up	no	WD repeat protein
AFLA_017740	0.80099	1.76857	0.2816	1.0814	0.558822	up	no	-1.5718	0.352477	down	no	conserved hypothetical protein
AFLA_017750	0.317655	0.559567	0.232967	0.74486	0.922167	up	no	-0.504945	0.988171	down	no	conserved hypothetical protein
AFLA_017760	1.22702	0.745896	1.02934	-0.707677	0.639755	down	no	-0.248459	0.786246	down	no	phenol 2-monooxygenase, putative
AFLA_017770	7.53649	6.83326	7.90857	-0.183699	0.971177	down	no	0.0169386	1	up	no	D-isomer specific 2-hydroxyacid dehydrogenase family protein
AFLA_017780	32.1013	49.0524	39.2623	0.590379	0.491455	up	no	0.26331	0.678157	up	no	oligopeptide transporter, OPT family, putative
AFLA_017790	16.8241	9.91429	12.459	-0.770711	0.563083	down	no	-0.433571	0.56038	down	no	hypothetical protein
AFLA_017800	9.2037	5.1409	4.80274	-0.844467	0.27946	down	no	-0.932287	0.0110919	down	no	SH3 domain protein
AFLA_017810	15.0555	17.4495	23.4863	0.200762	0.922255	up	no	0.621143	0.134475	up	no	cell division protein kinase (Ctk1), putative
AFLA_017820	56.6363	73.7955	79.4998	0.334531	0.755829	up	no	0.426045	0.163072	up	no	conserved hypothetical protein
AFLA_017830	538.885	234.87	210.14	-1.2116	0.0666932	down	no	-1.35856	7.85e-11	down	yes	small nuclear ribonucleoprotein complex protein Nhp2, putative
AFLA_017840	1.78276	1.80788	0.475259	-0.0352749	1	down	no	-1.89055	0.000571587	down	yes	NRPS-like enzyme, putative
AFLA_017850	196.73	248.828	116.399	0.241437	0.927807	up	no	-0.869598	0.213853	down	no	conserved hypothetical protein
AFLA_017860	1541.6	1565.24	933.801	-0.0582346	1	down	no	-0.826452	0.15007	down	no	hypothetical protein
AFLA_017870	31.6723	23.7105	32.8929	-0.444383	0.657163	down	no	0.030977	1	up	no	GTP-binding protein
AFLA_017880	116.343	239.788	182.47	0.994804	0.211998	up	no	0.57901	0.319387	up	no	conserved hypothetical protein
AFLA_017890	14.8722	17.3432	18.0347	0.155927	0.948092	up	no	0.197905	0.724587	up	no	SET domain protein
AFLA_017900	75.8568	47.042	34.6012	-0.719112	0.398625	down	no	-1.18938	0.00336894	down	yes	C6 transcription factor FacB/Cat8
AFLA_017910	126.962	197.312	278.872	0.583128	0.662294	up	no	1.11074	4.94e-05	up	yes	transketolase TktA
AFLA_017920	316.346	227.479	389.258	-0.459366	0.646405	down	no	0.302508	0.377247	up	no	spermidine synthase
AFLA_017930	0.90424	0.779913	1.06278	-0.205737	0.98272	down	no	0.290585	0.985934	up	no	conserved hypothetical protein
AFLA_017940	3.89454	3.33793	6.54562	-0.236097	0.939084	down	no	0.720595	0.213873	up	no	hypothetical protein
AFLA_017950	805.892	1205.54	1262.49	0.578758	0.503225	up	no	0.614617	0.0323112	up	no	ubiquinol-cytochrome C reductase complex subunit UcrQ, putative
AFLA_017960	202.183	326.015	287.807	0.673155	0.395297	up	no	0.472275	0.118658	up	no	prohibitin complex subunit Phb1, putative
AFLA_017970	9.25388	6.63337	6.6768	-0.485127	0.671114	down	no	-0.477284	0.315663	down	no	conserved hypothetical protein
AFLA_017980	44.4707	79.2586	57.6572	0.830245	0.258719	up	no	0.347212	0.263851	up	no	cell wall proline rich protein, putative
AFLA_017990	73.1333	86.4532	109.116	0.206614	0.892142	up	no	0.537809	0.103756	up	no	conserved hypothetical protein
AFLA_018000	33.3888	41.1803	51.6996	0.293713	0.831424	up	no	0.609248	0.067263	up	no	gamma tubulin MipA, putative
AFLA_018010	13.8163	14.4325	25.7971	0.0191325	1	up	no	0.829652	0.0373513	up	no	hydantoin racemase (Dcg1), putative
AFLA_018020	0.0250683	0.082305	0	1.79198	0.90032	up	no	#NAME?	1	down	no	gulonolactone oxidase, putative
AFLA_018030	0	0.111676	0.114528	Inf	1	up	no	Inf	1	up	no	conserved hypothetical protein
AFLA_018040	0.0567882	0.102086	0.0400658	0.636013	1	up	no	-0.709275	1	down	no	glucose-methanol-choline (gmc) oxidoreductase, putative
AFLA_018050	19.5022	20.0306	35.9942	-0.00159287	1	down	no	0.838829	0.0191986	up	no	aflatoxin B1-aldehyde reductase GliO-like, putative
AFLA_018060	0.315055	0.580295	1.18787	0.848335	0.939084	up	no	1.87819	0.275087	up	no	conserved hypothetical protein
AFLA_018070	1.56808	1.49907	1.52599	-0.089983	1	down	no	-0.0825809	0.998756	down	no	MFS transporter, putative
AFLA_018080	20.437	61.1108	48.639	1.5723	0.00320471	up	yes	1.21143	0.000116095	up	yes	DUF6 domain protein, putative
AFLA_018090	63.2743	105.61	124.965	0.733043	0.311706	up	no	0.948426	0.000980805	up	no	Arp2/3 complex subunit (Arp2), putative
AFLA_018100	14.9712	30.2284	23.0356	0.999938	0.130104	up	no	0.574162	0.171514	up	no	6-phosphogluconate dehydrogenase family protein
AFLA_018110	48.585	75.5601	60.9048	0.623345	0.447826	up	no	0.301026	0.436532	up	no	bZIP transcription factor, putative
AFLA_018120	70.5538	74.6489	80.0389	0.0381666	1	up	no	0.105628	0.844282	up	no	GTP cyclohydrolase II, putative
AFLA_018130	27.977	27.2148	35.2055	-0.0179739	1	down	no	0.330466	0.48205	up	no	SAGA-associated factor, putative
AFLA_018140	56.6806	63.4307	148.772	0.16025	0.938079	up	no	1.37287	8.28e-07	up	yes	mannose-6-phosphate isomerase, class I
AFLA_018150	20.9517	19.1238	15.9511	-0.123934	0.977758	down	no	-0.399647	0.321582	down	no	6-hexanolactone hydrolase, putative
AFLA_018160	57.3723	85.0378	90.3636	0.569308	0.486256	up	no	0.628605	0.0535788	up	no	Coatomer subunit epsilon, putative
AFLA_018170	17.1826	18.6931	14.2784	0.110531	0.974881	up	no	-0.301741	0.511586	down	no	1-phosphatidylinositol-bisphosphate phosphodiesterase Plc1, putative
AFLA_018180	0.711417	1.26723	1.17847	0.967493	0.907926	up	no	0.810933	0.916278	up	no	hypothetical protein
AFLA_018190	26.6142	30.1266	28.6814	0.174369	0.930482	up	no	0.0721912	0.944685	up	no	hypothetical protein
AFLA_018200	12.3531	14.4254	13.1045	0.261771	0.98266	up	no	0.119292	0.9937	up	no	conserved hypothetical protein
AFLA_018210	15.7141	15.0753	19.1272	-0.109102	1	down	no	0.230337	0.636118	up	no	cytochrome P450 pisatin demethylase, putative
AFLA_018220	22.5937	23.1332	22.966	-0.0161056	1	down	no	-0.0420877	1	down	no	conserved hypothetical protein
AFLA_018230	4.5902	4.15589	5.39579	-0.144922	1	down	no	0.20971	0.824412	up	no	short-chain dehydrogenase, putative
AFLA_018240	19.3002	40.8191	16.8373	1.11737	0.129151	up	no	-0.224908	0.87523	down	no	uridine permease Fui1, putative
AFLA_018250	18.5052	11.1812	9.03524	-0.765527	0.474301	down	no	-1.04483	4.9e-05	down	yes	conserved hypothetical protein
AFLA_018260	117.596	151.965	122.118	0.362072	0.715554	up	no	0.0127936	1	up	no	DUF543 domain protein
AFLA_018270	17.4047	14.8353	22.9102	-0.197966	0.948469	down	no	0.422299	0.690445	up	no	hypothetical protein
AFLA_018280	14.6175	16.3646	18.3588	0.201045	0.989098	up	no	0.356901	0.615358	up	no	mitochondrial outer membrane protein (Sam35), putative
AFLA_018290	68.8824	60.5065	49.8567	-0.231244	0.90032	down	no	-0.525626	0.130188	down	no	conserved hypothetical protein
AFLA_018300	31.6539	31.604	28.4111	-0.00323953	1	down	no	-0.178849	0.713339	down	no	cell division control protein 14
AFLA_018310	22.3414	32.5252	37.1478	0.528872	0.548405	up	no	0.697451	0.0500264	up	no	geranylgeranyl diphosphate synthase
AFLA_018320	49.888	48.1586	50.0324	-0.0387132	1	down	no	0.0144422	0.985934	up	no	Smr domain protein
AFLA_018330	4.1112	12.5368	6.95117	1.64423	0.306838	up	no	0.804629	0.631319	up	no	hypothetical protein
AFLA_018340	116.716	100.741	103.306	-0.213151	0.87675	down	no	-0.18381	0.546023	down	no	G-protein complex alpha subunit GpaA/FadA
AFLA_018350	105.704	180.64	133.757	0.805739	0.627554	up	no	0.370572	0.801861	up	no	conserved hypothetical protein
AFLA_018360	30.5931	48.7051	36.0889	0.60567	0.535864	up	no	0.192496	0.808359	up	no	4-coumarate-CoA ligase, putative
AFLA_018370	14.435	14.1523	9.70758	-0.0315398	1	down	no	-0.570478	0.0427593	down	no	nucleoporin (Nup184), putative
AFLA_018380	45.2188	63.1208	64.7691	0.471314	0.628469	up	no	0.489517	0.104556	up	no	anthranilate synthase multifunctional protein TrpC, putative
AFLA_018390	64.8737	36.4947	42.2343	-0.828763	0.269791	down	no	-0.607955	0.0396437	down	no	U3 small nucleolar ribonucleoprotein protein IMP4, putative
AFLA_018400	33.8771	45.5141	34.5809	0.414384	0.723342	up	no	0.0146269	1	up	no	regulator of nonsense transcripts, putative
AFLA_018410	326.384	699.45	314.658	1.09271	0.19988	up	no	-0.0925683	0.766108	down	no	C2H2 transcription factor, putative
AFLA_018420	14.3783	20.5584	27.2046	0.479266	0.634781	up	no	0.870786	0.0295886	up	no	possible dual specificity protein phosphatase 3
AFLA_018430	3.49572	2.09222	0.591399	-0.827598	0.756185	down	no	-2.59803	0.000150468	down	yes	hypothetical protein
AFLA_018440	11.2453	10.8745	8.76433	-0.053542	0.991071	down	no	-0.347693	0.363301	down	no	SNF2 family helicase/ATPase PasG, putative
AFLA_018450	6.97553	54.6703	57.6804	3.0496	0.000396609	up	yes	3.07229	1.7e-12	up	yes	tyrosinase, putative
AFLA_018460	2.73309	18.6187	11.798	2.8354	4.77e-05	up	yes	2.13294	0.000262895	up	yes	conserved hypothetical protein
AFLA_018470	5.04966	26.5121	21.6906	2.44421	0.0585279	up	no	2.11496	0.00193694	up	yes	conserved hypothetical protein
AFLA_018480	34.8497	73.6709	76.3728	1.07338	0.079619	up	no	1.09235	0.000219548	up	yes	cytoskeletal adaptor protein SagA
AFLA_018490	110.362	464.812	269.174	2.0139	0.0124774	up	yes	1.2019	0.0687996	up	no	conserved hypothetical protein
AFLA_018500	14.1163	39.4094	24.8136	1.44884	0.00816503	up	yes	0.745398	0.0427604	up	no	conserved hypothetical protein
AFLA_018510	18.4373	25.4073	20.0887	0.432207	0.686184	up	no	0.0719547	0.947838	up	no	conserved hypothetical protein
AFLA_018520	70.4482	126.073	95.438	0.805166	0.271165	up	no	0.383143	0.244077	up	no	SCF ubiquitin ligase complex subunit CulA, putative
AFLA_018530	15.3962	21.9648	16.0481	0.517248	0.614824	up	no	0.0548676	1	up	no	Avl9 protein, putative
AFLA_018540	92.7997	120.457	88.3236	0.349593	0.731325	up	no	-0.123878	0.788788	down	no	G protein complex alpha subunit GpaB
AFLA_018550	76.3826	101.809	161.432	0.399774	0.731325	up	no	1.05368	0.000107505	up	yes	glycogen phosphorylase GlpV/Gph1, putative
AFLA_018560	34.8745	26.3681	13.2373	-0.359958	0.84563	down	no	-1.38699	9.07e-08	down	yes	ABC fatty acid transporter, putative
AFLA_018570	5.46871	3.91339	2.78818	-0.494698	0.713609	down	no	-0.982501	0.0624239	down	no	monooxygenase, putative
AFLA_018580	2.31161	2.07739	1.45757	-0.159818	0.970509	down	no	-0.667499	0.329003	down	no	conserved hypothetical protein
AFLA_018590	2.3482	3.54947	4.00561	0.562048	0.796112	up	no	0.776673	0.294919	up	no	aspartate aminotransferase, putative
AFLA_018600	2.39078	2.49472	4.3228	0.0169442	1	up	no	0.812865	0.184524	up	no	sulfite reductase, putative
AFLA_018610	0.638535	0.413474	0.521993	-0.648081	0.866521	down	no	-0.336469	0.969668	down	no	conserved hypothetical protein
AFLA_018620	0.0689182	0.0231205	0.0432522	-1.55352	0.961503	down	no	-0.753411	1	down	no	pyrroline-5-carboxylate dehydrogenase, putative
AFLA_018630	2.99589	2.21141	1.56833	-0.453749	0.80999	down	no	-0.968668	0.145395	down	no	conserved hypothetical protein
AFLA_018640	1.82225	2.18675	2.31081	0.253138	0.987929	up	no	0.344213	0.797564	up	no	hypothetical protein
AFLA_018650	4.96435	0.632271	0.522394	-2.90575	0.274846	down	no	-3.17031	0.0671141	down	no	translation initiation inhibitor, putative
AFLA_018660	7.81057	3.94318	3.43152	-0.968348	0.349161	down	no	-1.19803	0.0213689	down	yes	conserved hypothetical protein
AFLA_018670	26.8831	27.0289	21.1119	-0.0492654	1	down	no	-0.39699	0.164836	down	no	cell wall biogenesis protein Mhp1, putative
AFLA_018680	3.85398	3.47457	2.12801	-0.268097	1	down	no	-0.941075	0.104913	down	no	benomyl/methotrexate resistance protein, putative
AFLA_018690	0.65243	0.370067	0.193243	-0.977529	1	down	no	-1.84372	0.483549	down	no	conserved hypothetical protein
AFLA_018700	960.724	390.451	603.576	-1.29014	0.0573654	down	no	-0.66627	0.00445076	down	no	60S ribosomal protein L5, putative
AFLA_018710	7.47739	4.40236	3.15883	-0.762736	0.582581	down	no	-1.27199	0.0154712	down	yes	hypothetical protein
AFLA_018720	0.776154	0.532304	0.161828	-0.567877	0.822621	down	no	-2.30307	0.00222335	down	yes	ABC multidrug transporter, putative
AFLA_018730	30.3809	16.0461	10.6645	-0.922262	0.255874	down	no	-1.53648	4.77e-06	down	yes	epoxide hydrolase, putative
AFLA_018740	53.3686	17.0817	12.5801	-1.70028	0.0041339	down	yes	-2.14902	1.63e-12	down	yes	magnesium and cobalt transport protein and translocase of inner mitochondrial membrane, putative
AFLA_018750	1.18215	0.67264	0.835997	-0.909877	0.575773	down	no	-0.588523	0.511202	down	no	phosphatidylinositol glycan, putative
AFLA_018760	37.7737	51.8214	49.5529	0.475925	0.652975	up	no	0.373788	0.388293	up	no	kinetochore protein fta4, putative
AFLA_018770	30.3531	46.2349	32.2859	0.604477	0.439409	up	no	0.0523212	0.962711	up	no	conserved hypothetical protein
AFLA_018780	3.39249	3.20057	5.57044	-0.110404	1	down	no	0.693141	0.407798	up	no	DUF718 domain protein
AFLA_018790	0.898711	0.409906	28.91	-1.1509	0.607903	down	no	4.92399	7.95e-20	up	yes	nitrate transporter CrnA
AFLA_018800	88.088	136.899	185.84	0.594411	0.583382	up	no	1.01125	0.000208901	up	yes	nitrite reductase NiiA
AFLA_018810	24.7235	42.5916	71.5081	0.779908	0.358185	up	no	1.49795	0.000848655	up	yes	nitrate reductase NiaD
AFLA_018820	14.4676	15.9283	20.7374	0.0694085	1	up	no	0.449375	0.251821	up	no	gamma-tubulin complex component GCP6, putative
AFLA_018830	13.2436	12.8464	15.3784	-0.0229272	1	down	no	0.208802	0.874475	up	no	conserved hypothetical protein
AFLA_018840	42.5959	52.375	54.3923	0.285156	0.86753	up	no	0.329175	0.600337	up	no	hypothetical protein
AFLA_018850	302.467	287.745	216.283	-0.0845171	1	down	no	-0.514373	0.050222	down	no	isocitrate dehydrogenase, NAD-dependent
AFLA_018860	16.8248	16.7433	16.3344	-0.0353932	1	down	no	-0.082018	0.876863	down	no	Exocyst complex component Sec5, putative
AFLA_018870	234.707	138.629	115.351	-0.837031	0.366672	down	no	-1.11375	4.63e-06	down	yes	conserved hypothetical protein
AFLA_018880	120.348	113.961	110.015	-0.17607	0.940039	down	no	-0.226315	0.490827	down	no	conserved hypothetical protein
AFLA_018890	6.66585	16.477	9.54242	1.2202	0.114712	up	no	0.445138	0.242889	up	no	factor for adipocyte differentiation, putative
AFLA_018900	16.5083	20.9581	16.2759	0.335709	0.773937	up	no	-0.0629338	1	down	no	conserved hypothetical protein
AFLA_018910	1.57717	1.63199	2.67135	0.0150574	1	up	no	0.736798	0.395578	up	no	elastase, putative
AFLA_018920	2.41968	2.45008	2.73559	-0.078025	1	down	no	0.045253	0.928449	up	no	hypothetical protein
AFLA_018930	65.1177	80.3398	96.8582	0.262921	0.846994	up	no	0.525058	0.0781854	up	no	adenylyl cyclase-associated protein (cap)
AFLA_018940	7.05485	8.34734	15.8491	0.213166	0.905053	up	no	1.12183	0.0058551	up	yes	PfkB family carbohydrate kinase (Mak32), putative
AFLA_018950	219.461	270.767	324.724	0.30899	0.798834	up	no	0.535877	0.076681	up	no	conserved hypothetical protein
AFLA_018960	62.1532	59.8788	45.8097	-0.0449147	1	down	no	-0.440288	0.149124	down	no	60S ribosomal protein L3
AFLA_018970	8.79602	12.8264	13.248	0.525163	0.62621	up	no	0.555639	0.291391	up	no	PBSP domain protein
AFLA_018980	13.82	9.69697	10.4013	-0.523284	0.710021	down	no	-0.39323	0.408413	down	no	hypothetical protein
AFLA_018990	11.8381	12.1634	11.4981	0.0324426	1	up	no	-0.0369517	0.94777	down	no	protein STU1, putative
AFLA_019000	13.3814	6.10737	10.9834	-1.30212	0.621663	down	no	-0.420606	0.476444	down	no	conserved hypothetical protein
AFLA_019010	67.8953	99.6922	111.634	0.535306	0.621663	up	no	0.710095	0.0155369	up	no	C2H2 finger domain protein, putative
AFLA_019020	49.7859	40.47	31.1062	-0.284253	0.825782	down	no	-0.678588	0.0187545	down	no	RNA polymerase II Elongator complex associated protein Kti12
AFLA_019030	55.7617	132.13	123.122	1.22533	0.0600457	up	no	1.08214	0.00247283	up	yes	hypothetical protein
AFLA_019040	102.618	301.591	244.651	1.52748	0.0269594	up	yes	1.17608	0.0182087	up	yes	conserved hypothetical protein
AFLA_019050	605.699	576.363	620.836	-0.125814	1	down	no	-0.0378001	1	down	no	conserved hypothetical protein
AFLA_019060	12.3706	3.31162	5.50113	-1.90333	0.00101622	down	yes	-1.16302	0.000212416	down	yes	ABC transporter, putative
AFLA_019070	1.42528	0.402228	0.715005	-1.90874	0.269791	down	no	-1.09936	0.325962	down	no	multidrug resistance protein, putative
AFLA_019080	0.418591	0.27433	0.413073	-0.473393	1	down	no	0.0310786	1	up	no	hypothetical protein
AFLA_019090	21.4421	9.65369	8.4992	-1.17807	0.14142	down	no	-1.36935	0.00130094	down	yes	conserved hypothetical protein
AFLA_019100	28.3518	23.856	27.8221	-0.277897	0.954952	down	no	-0.0885649	0.870098	down	no	F-box domain protein
AFLA_019110	42.6059	53.5932	46.1784	0.32385	0.79063	up	no	0.0823285	0.970549	up	no	conserved hypothetical protein
AFLA_019120	15.4386	9.35151	4.0979	-0.748642	0.445634	down	no	-1.93007	8.8e-05	down	yes	conserved hypothetical protein
AFLA_019130	60.8799	93.1068	74.8607	0.616201	0.523015	up	no	0.261587	0.619604	up	no	metacaspase CasB
AFLA_019140	4.65484	2.69193	1.50339	-0.788291	0.461622	down	no	-1.6519	0.00411835	down	yes	conserved hypothetical protein
AFLA_019150	5.55335	2.95344	0.983287	-0.908841	0.53425	down	no	-2.51642	7.75e-06	down	yes	conserved hypothetical protein
AFLA_019160	0.620732	0	0.0838831	#NAME?	0.294015	down	no	-2.91073	0.288118	down	no	conserved hypothetical protein
AFLA_019170	0.251455	0.128671	0.060177	-1.00589	1	down	no	-2.20601	0.663461	down	no	conserved hypothetical protein
AFLA_019180	2.88726	4.0364	6.95599	0.523365	0.833888	up	no	1.27183	0.116527	up	no	CipC-like antibiotic response protein, putative
AFLA_019190	2.77853	0.481819	1.00064	-2.57762	0.00569675	down	yes	-1.5259	0.0136565	down	yes	aspartyl protease, putative
AFLA_019200	35.4111	24.5248	23.8782	-0.598667	0.674236	down	no	-0.666986	0.411742	down	no	conserved hypothetical protein
AFLA_019210	6.57426	5.00217	4.42502	-0.497362	0.876232	down	no	-0.640833	0.427571	down	no	short-chain dehydrogenase, putative
AFLA_019220	7.48236	7.01802	4.1244	-0.13324	1	down	no	-0.86564	0.281483	down	no	hypothetical protein
AFLA_019230	9977.58	10254.7	5152.15	-0.0358867	1	down	no	-1.05058	0.035609	down	yes	mismatched base pair and cruciform DNA recognition protein, putative
AFLA_019240	12.1918	20.5119	12.281	0.736817	0.439468	up	no	-0.0312451	0.979557	down	no	conserved hypothetical protein
AFLA_019250	33.1253	22.9018	28.1047	-0.599393	0.64137	down	no	-0.342996	0.95446	down	no	mercuric reductase, putative
AFLA_019260	1.55017	0.537924	0.230351	-1.67112	0.386482	down	no	-2.9081	0.051851	down	no	short-chain dehydrogenase, putative
AFLA_019270	192.917	117.368	110.822	-0.813078	0.481841	down	no	-0.889779	0.000200905	down	no	NADH-dependent flavin oxidoreductase, putative
AFLA_019280	150.157	282.34	334.949	0.893377	0.17903	up	no	1.10355	6.96e-05	up	yes	peroxiredoxin, putative
AFLA_019290	0.971962	0.356775	0.11415	-1.30515	0.812459	down	no	-3.06208	0.253591	down	no	hypothetical protein
AFLA_019300	82.5625	21.0724	31.5762	-1.99197	0.0958253	down	no	-1.37036	5.68e-08	down	yes	conserved hypothetical protein
AFLA_019310	66.7861	113.383	133.427	0.75618	0.429342	up	no	0.982874	0.0854171	up	no	phospholipase, putative
AFLA_019320	2.65768	2.35221	0.971532	-0.144094	1	down	no	-1.43396	0.0260534	down	yes	hypothetical protein
AFLA_019330	0.255019	0.318825	0.222888	0.399415	0.96022	up	no	-0.191388	1	down	no	MFS transporter, putative
AFLA_019340	3.93638	0.732509	0.320149	-2.46912	0.0501604	down	no	-3.71352	9.54e-06	down	yes	conserved hypothetical protein
AFLA_019350	1.54589	0.462215	0.200959	-1.78264	0.0880005	down	no	-3.00648	0.00462821	down	yes	conserved hypothetical protein
AFLA_019370	0.0460691	0	0	#NAME?	1	down	no	#NAME?	1	down	no	integral membrane protein
AFLA_019380	0.0648738	0	0.0689769	#NAME?	1	down	no	0.187041	1	up	no	hypothetical protein
AFLA_019400	0.105725	0	0	#NAME?	0.846994	down	no	#NAME?	0.677803	down	no	hypothetical protein
AFLA_019410	0.294041	0.590097	0.242308	1.06576	0.760923	up	no	-0.262152	1	down	no	conserved hypothetical protein
AFLA_019420	49.0849	21.0821	52.9861	-1.15109	0.184312	down	no	0.163222	0.775672	up	no	allantoate permease, putative
AFLA_019430	56.4536	51.3149	111.144	-0.0958091	0.993212	down	no	1.00564	0.00481305	up	yes	monoxygenase, putative
AFLA_019440	238.285	83.2168	180.168	-1.51092	0.0225999	down	yes	-0.401395	0.140482	down	no	conserved hypothetical protein
AFLA_019450	7.48154	1.93111	8.22655	-2.00325	0.0975354	down	no	0.0987869	0.955448	up	no	hypothetical protein
AFLA_019460	8.51731	5.21896	7.66562	-0.715986	0.588963	down	no	-0.179051	0.894656	down	no	conserved hypothetical protein
AFLA_019470	0.780322	0.262285	0.293935	-1.59773	0.469657	down	no	-1.48262	0.26443	down	no	NmrA-like family protein
AFLA_019480	0.0387541	0.0520928	0.0410133	0.0966237	1	up	no	-0.124313	1	down	no	conserved hypothetical protein
AFLA_019490	168.531	144.762	207.02	-0.289012	0.857287	down	no	0.227152	0.663011	up	no	ThiJ/PfpI family protein
AFLA_019500	0.940315	3.28527	1.34788	1.77533	0.260784	up	no	0.510975	0.815922	up	no	hypothetical protein
AFLA_019510	7.5815	4.10024	2.55986	-0.971946	0.406448	down	no	-1.65581	0.00509262	down	yes	conserved hypothetical protein
AFLA_019520	23.6185	42.4886	54.6078	0.856963	0.222748	up	no	1.19145	7.56e-05	up	yes	conserved hypothetical protein
AFLA_019530	11.0756	9.80855	15.3024	-0.184816	0.968407	down	no	0.428858	0.388009	up	no	thiamin pyrophosphokinase, putative
AFLA_019540	1.36565	0.93414	0.879909	-0.578142	0.728143	down	no	-0.64346	0.43794	down	no	glucose dehydrogenase, putative
AFLA_019550	23.0471	4.68002	7.70737	-2.32252	0.489344	down	no	-1.52648	1.3e-06	down	yes	MFS multidrug transporter, putative
AFLA_019560	0.593712	0.814076	0.703063	0.461293	0.92355	up	no	0.208362	1	up	no	hypothetical protein
AFLA_019570	9.08829	4.83791	14.9631	-0.906495	0.311408	down	no	0.692656	0.0728015	up	no	efflux pump antibiotic resistance protein, putative
AFLA_019580	0.745423	0.714031	0.439792	-0.17149	1	down	no	-0.852207	0.593406	down	no	sugar transporter, putative
AFLA_019590	0.497855	0.0813194	0.504146	-2.67432	0.639726	down	no	-0.131655	1	down	no	conserved hypothetical protein
AFLA_019600	1.07368	0.394898	0.591565	-1.44058	0.73262	down	no	-0.84864	0.743008	down	no	hypothetical protein
AFLA_019610	5.97297	10.5678	23.8006	0.794127	0.393799	up	no	1.90783	0.00110316	up	yes	carboxypeptidase S1, putative
AFLA_019620	895.315	1062.26	1711.25	0.143232	0.984189	up	no	0.801465	0.0253243	up	no	conserved hypothetical protein
AFLA_019630	2.44448	1.60806	0.963368	-0.587554	0.802244	down	no	-1.34743	0.107121	down	no	plasma membrane ammonium transporter (Ato3), putative
AFLA_019640	11.7911	12.9745	9.79644	0.018889	1	up	no	-0.35015	0.657283	down	no	efflux pump antibiotic resistance protein, putative
AFLA_019650	100.698	109.732	122.791	0.00676479	1	up	no	0.161543	0.894046	up	no	phosphoketolase, putative
AFLA_019660	17.7721	11.8099	8.69031	-0.617653	0.58839	down	no	-1.08392	0.00550366	down	yes	deoxyribonuclease tatD, putative
AFLA_019670	139.945	79.1092	139.687	-0.862796	0.274846	down	no	-0.0631169	0.920995	down	no	methyltransferase, putative
AFLA_019680	166.116	79.2682	98.1413	-1.14991	0.146591	down	no	-0.84918	0.000506265	down	no	zinc metalloproteinase, putative
AFLA_019690	88.5233	59.066	52.4012	-0.574266	0.552926	down	no	-0.753714	0.029324	down	no	3-ketoacyl-CoA ketothiolase (Kat1), putative
AFLA_019700	101.433	188.166	130.64	0.859303	0.267021	up	no	0.294588	0.390049	up	no	conserved hypothetical protein
AFLA_019710	25.7509	25.4676	18.7546	-0.0258009	1	down	no	-0.490439	0.232348	down	no	conserved hypothetical protein
AFLA_019720	9.57512	8.04511	11.239	-0.275096	0.826516	down	no	0.220831	0.690457	up	no	Rho GTPase activator Rga, putative
AFLA_019730	8.71188	6.71652	11.9199	-0.412979	0.805443	down	no	0.435587	0.494844	up	no	GTPase activator protein, putative
AFLA_019740	5.85511	2.37439	1.94789	-1.33992	0.53634	down	no	-1.5702	1.54e-05	down	yes	multidrug resistance protein 1, 2, putative
AFLA_019750	1.72949	1.58338	0.357057	-0.077506	1	down	no	-2.16174	0.525007	down	no	hypothetical protein
AFLA_019760	58.2302	77.1156	68.6724	0.366463	0.710249	up	no	0.167641	0.71005	up	no	palmitoyl-protein thioesterase precursor
AFLA_019770	17.6323	21.0854	21.7115	0.2336	0.883676	up	no	0.269966	0.464765	up	no	protein efr3
AFLA_019780	41.0175	51.3629	47.3655	0.301116	0.792317	up	no	0.15446	0.786382	up	no	RNA polymerase II mediator complex subunit Soh1, putative
AFLA_019790	25.2155	31.7698	33.6661	0.253635	0.912176	up	no	0.330863	0.6525	up	no	hypothetical protein
AFLA_019800	36.9858	34.9406	22.1341	-0.0710155	1	down	no	-0.745752	0.00537839	down	no	extracellular phytase, putative
AFLA_019810	88.2051	89.373	85.3002	-0.00915974	1	down	no	-0.0936877	0.814796	down	no	protein pal1, putative
AFLA_019820	42.0401	24.2149	17.5095	-0.818135	0.524164	down	no	-1.25036	4.66e-07	down	yes	DNA replication licensing factor Mcm2, putative
AFLA_019830	16.3814	20.8086	17.4457	0.359069	0.771254	up	no	0.0824381	0.955785	up	no	metaphase-anaphase transition protein (Mlo2), putative
AFLA_019840	76.6689	88.6348	156.153	0.144139	0.96055	up	no	0.973213	0.00499537	up	no	cyclin-dependent protein kinase Ssn3, putative
AFLA_019850	16.7811	18.7893	21.5305	0.117131	0.964651	up	no	0.270419	0.717118	up	no	conserved hypothetical protein
AFLA_019860	15.9487	33.197	24.5707	1.04056	0.115701	up	no	0.567119	0.113846	up	no	MFS glucose transporter, putative
AFLA_019870	28.7115	64.7138	58.91	1.15698	0.0590434	up	no	0.988656	0.000241334	up	no	phosphatidylserine decarboxylase Psd2, putative
AFLA_019880	14.561	15.8019	14.1717	0.135631	0.985118	up	no	-0.0368534	0.938774	down	no	Mis12-Mtw1 family protein
AFLA_019890	7.52813	7.15729	5.23912	-0.0641921	1	down	no	-0.540902	0.378779	down	no	conserved hypothetical protein
AFLA_019900	2.11346	1.82692	1.86139	-0.24323	0.968261	down	no	-0.222863	0.8574	down	no	hypothetical protein
AFLA_019910	0	0.10032	0	Inf	1	up	no					conserved hypothetical protein
AFLA_019920	0.153967	0.102754	0.0489937	-0.560526	1	down	no	-1.74161	0.844477	down	no	hypothetical protein
AFLA_019930	3.46874	1.97789	0.457619	-0.822776	0.558822	down	no	-2.9712	1.84e-05	down	yes	short chain dehydrogenase/reductase, putative
AFLA_019940	6.03407	2.43064	0.698351	-1.28394	0.148497	down	no	-3.11627	9.3e-05	down	yes	sugar transporter, putative
AFLA_019950	7.27859	4.75839	6.39782	-0.676117	0.699103	down	no	-0.272014	0.748361	down	no	conserved hypothetical protein
AFLA_019960	1.46306	0.994068	0.550275	-0.544587	0.903552	down	no	-1.42135	0.22292	down	no	conserved hypothetical protein
AFLA_019970	0	0	0.107357					Inf	0.726981	up	no	conserved hypothetical protein
AFLA_019980	0.0116815	0.0272955	0.0513701	0.968686	1	up	no	1.91222	0.658288	up	no	beta-galactosidase, putative
AFLA_019990	0.211929	0.0818534	0.260483	-1.43131	0.82276	down	no	0.276832	1	up	no	conserved hypothetical protein
AFLA_020000	1.14847	0.346445	1.2694	-1.76561	0.253711	down	no	0.108783	1	up	no	pectinesterase precursor, putative
AFLA_020010	492.144	165.276	261.628	-1.54848	0.0647063	down	no	-0.8984	0.0415038	down	no	hypothetical protein
AFLA_020020	1040.63	710.683	584.433	-0.650275	0.531957	down	no	-0.924381	0.0188585	down	no	conserved hypothetical protein
AFLA_020030	1.29925	1.75171	0.811777	0.312793	0.884036	up	no	-0.728494	0.439393	down	no	conserved hypothetical protein
AFLA_020040	0.303456	0.448285	0.0870604	0.54769	0.866521	up	no	-1.82454	0.35078	down	no	pyruvate decarboxylase, putative
AFLA_020050	1.17454	0.765534	0.729225	-0.622564	0.817538	down	no	-0.717646	0.52116	down	no	alpha-ketoglutarate-dependent sulfonate dioxygenase, putative
AFLA_020060	2.87648	2.98446	6.07255	-0.0671225	1	down	no	0.970405	0.103851	up	no	conserved hypothetical protein
AFLA_020070	14.4667	29.1352	30.4048	0.999251	0.506166	up	no	1.09274	0.00178798	up	yes	DUF1212 domain membrane protein Prm10, putative
AFLA_020080	1.78077	1.15753	1.26486	-0.611102	0.675908	down	no	-0.466021	0.617029	down	no	MFS transporter, putative
AFLA_020090	2.13928	1.80375	2.07368	-0.258862	0.915284	down	no	-0.0448824	1	down	no	conserved hypothetical protein
AFLA_020100	63.5557	50.4372	44.2146	-0.33138	0.761696	down	no	-0.512315	0.067637	down	no	conserved hypothetical protein
AFLA_020110	48.3662	28.7894	31.8331	-0.751683	0.358081	down	no	-0.597749	0.127737	down	no	conserved hypothetical protein
AFLA_020120	0.105376	0.510116	0.42863	2.29673	0.758745	up	no	2.11587	0.635416	up	no	hypothetical protein
AFLA_020130	14.7066	9.91819	8.37777	-0.540269	0.638544	down	no	-0.785806	0.040784	down	no	APSES transcription factor, putative
AFLA_020140	103.88	131.22	140.449	0.350609	0.744758	up	no	0.417923	0.236399	up	no	NADH-ubiquinone oxidoreductase B18 subunit, putative
AFLA_020150	51.3569	38.6892	56.0646	-0.4612	0.667284	down	no	0.0701981	0.900382	up	no	glutamate-cysteine ligase Gcs1, putative
AFLA_020160	0.390671	2.98613	1.34255	2.88612	0.0313995	up	yes	1.79019	0.146665	up	no	conserved hypothetical protein
AFLA_020170	1.29325	1.68276	1.03931	0.356899	0.911375	up	no	-0.32563	0.77314	down	no	extracellular lipase, putative
AFLA_020180	1.83011	2.27015	1.70269	0.314899	0.963859	up	no	-0.0869938	0.955938	down	no	conserved hypothetical protein
AFLA_020190	2.00557	8.53433	0.755633	2.06784	0.499951	up	no	-1.40298	0.393673	down	no	hypothetical protein
AFLA_020200	22.1738	26.0047	21.9427	0.158085	0.956141	up	no	-0.0819235	0.983809	down	no	hypothetical protein
AFLA_020210	181.363	311.854	194.178	0.739316	0.352911	up	no	0.0366589	0.951973	up	no	sexual development transcription factor NsdD
AFLA_020220	0.149798	0.109991	0.215948	-0.496441	1	down	no	0.541259	0.925771	up	no	aminotransferase class III, putative
AFLA_020230	0.487221	0.599995	0.535283	0.200071	1	up	no	0.0143383	1	up	no	hypothetical protein
AFLA_020240	4.94734	3.89979	3.34205	-0.352757	0.863822	down	no	-0.600234	0.323834	down	no	hypothetical protein
AFLA_020250	15.5975	26.6407	24.8083	0.78496	0.303306	up	no	0.66373	0.0666205	up	no	vacuolar segregation protein pep7, putative
AFLA_020260	44.8242	49.0278	36.9356	0.112072	1	up	no	-0.28593	0.308743	down	no	cation transporting ATPase, putative
AFLA_020270	20.8742	15.1618	13.6999	-0.442241	0.713609	down	no	-0.581263	0.394886	down	no	integral membrane protein, putative
AFLA_020280	162.682	358.054	548.872	1.12642	0.07151	up	no	1.71426	5.65e-10	up	yes	glycolipid transfer protein HET-C2, putative
AFLA_020290	16.699	29.6641	20.1718	0.782288	0.269791	up	no	0.207455	0.659239	up	no	PH domain protein
AFLA_020300	15.1038	24.8652	20.4498	0.733626	0.379981	up	no	0.423907	0.407949	up	no	mitochondrial inner membrane protease subunit Imp2, putative
AFLA_020310	36.6967	88.1616	72.5517	1.25906	0.0288883	up	yes	0.943966	0.00153291	up	no	F-box domain protein
AFLA_020320	0	0.38704	0	Inf	0.849543	up	no					hypothetical protein
AFLA_020330	7.00802	4.49759	5.91521	-0.666939	0.535358	down	no	-0.252102	0.663461	down	no	conserved hypothetical protein
AFLA_020340	61.6086	75.438	81.9257	0.286211	0.823838	up	no	0.386005	0.265142	up	no	sulfate transporter, putative
AFLA_020350	317.226	218.681	270.207	-0.540721	0.547788	down	no	-0.238239	0.399524	down	no	translation initiation factor 2 alpha subunit, putative
AFLA_020360	14.8961	29.5319	65.554	0.982845	0.137398	up	no	2.11182	3.34e-12	up	yes	potassium ion channel Yvc1, putative
AFLA_020370	23.9096	32.303	52.9745	0.413884	0.707704	up	no	1.10844	0.00184748	up	yes	LRP16 family protein
AFLA_020380	127.894	196.863	180.417	0.580983	0.640639	up	no	0.412698	0.207038	up	no	stomatin family protein
AFLA_020390	28.1328	32.5083	30.3321	0.218325	0.889226	up	no	0.0953154	0.919304	up	no	conserved hypothetical protein
AFLA_020400	7.25103	7.10944	8.35715	-0.0115021	1	down	no	0.212082	0.764573	up	no	conserved hypothetical protein
AFLA_020410	6.93675	7.17684	6.90564	0.0590784	1	up	no	0.00626398	1	up	no	C6 transcription factor, putative
AFLA_020420	21.238	30.3696	49.6019	0.503015	0.588915	up	no	1.18055	0.00223072	up	yes	conserved hypothetical protein
AFLA_020430	2.39355	2.17239	3.25596	-0.146021	0.99579	down	no	0.425475	0.577414	up	no	extracellular dioxygenase, putative
AFLA_020440	3.1924	5.55512	6.82551	0.723457	0.607903	up	no	1.00573	0.14246	up	no	conserved hypothetical protein
AFLA_020450	186.967	93.2545	71.2272	-1.01993	0.282734	down	no	-1.38489	3.16e-11	down	yes	nucleolar protein nop5
AFLA_020460	39.0507	67.7269	81.413	0.794622	0.267614	up	no	1.02763	0.000622264	up	yes	vacuolar ATP synthase subunit d, putative
AFLA_020470	94.2654	73.7391	60.1915	-0.362597	0.714575	down	no	-0.652246	0.0121666	down	no	ribose-phosphate pyrophosphokinase
AFLA_020480	72.66	119.038	115.213	0.684189	0.331668	up	no	0.606598	0.0602266	up	no	ubiquitin-like protein (HubA), putative
AFLA_020490	16.485	14.3998	13.327	-0.209089	0.883882	down	no	-0.298813	0.4336	down	no	pseudouridylate synthase 3
AFLA_020500	13.4781	20.1648	20.9609	0.567956	0.525884	up	no	0.586404	0.165374	up	no	Rho-like small GTPase, putative
AFLA_020510	998.462	332.397	468.176	-1.60188	0.0995177	down	no	-1.07704	5.07e-07	down	yes	40S ribosomal protein S0
AFLA_020520	141.98	144.385	139.003	0.0256025	1	up	no	-0.0559259	0.904779	down	no	ribosomal protein S15, putative
AFLA_020530	4.31684	1.11467	2.05317	-1.89835	0.183694	down	no	-1.04132	0.250487	down	no	conserved hypothetical protein
AFLA_020540	27.9941	28.0579	23.4965	-0.0192405	1	down	no	-0.269651	0.439643	down	no	conserved hypothetical protein
AFLA_020550	36.4368	16.3373	15.2128	-1.17847	0.51239	down	no	-1.23162	7.34e-06	down	yes	DEAD/DEAH box helicase (Sbp4), putative
AFLA_020560	38.0389	52.7747	34.2334	0.483697	0.619432	up	no	-0.164765	0.704894	down	no	phosphatidate cytidylyltransferase, putative
AFLA_020570	6.7193	5.29613	6.13438	-0.338388	0.775766	down	no	-0.120119	0.767999	down	no	Rad2-like endonuclease, putative
AFLA_020580	6.38997	8.30135	10.7792	0.407083	0.749018	up	no	0.753882	0.088848	up	no	actin-related protein RO7, putative
AFLA_020590	11.0383	7.55581	8.37472	-0.55558	0.625761	down	no	-0.428207	0.468041	down	no	aldose 1-epimerase, putative
AFLA_020600	7.45958	8.01428	7.62592	0.103261	1	up	no	0.0223139	1	up	no	AT DNA binding protein, putative
AFLA_020610	8.13327	9.63773	11.9271	0.222176	0.90032	up	no	0.496278	0.383922	up	no	conserved hypothetical protein
AFLA_020620	19.7867	18.1096	30.1783	-0.15956	0.949311	down	no	0.560543	0.342383	up	no	protein kinase domain-containing protein
AFLA_020630	5.59888	6.79299	5.70891	0.233023	0.921829	up	no	-0.0130744	1	down	no	1,3-beta-glucanosyltransferase, putative
AFLA_020640	73.5649	92.3054	96.955	0.297601	0.766066	up	no	0.334486	0.285995	up	no	conserved hypothetical protein
AFLA_020650	337.571	254.489	254.826	-0.458415	0.764338	down	no	-0.492687	0.461671	down	no	YjgH family protein
AFLA_020660	25.3602	19.7934	17.6175	-0.403014	0.741135	down	no	-0.56267	0.247682	down	no	conserved hypothetical protein
AFLA_020670	43.0016	36.7734	29.6192	-0.23773	0.846994	down	no	-0.548673	0.0581897	down	no	conserved hypothetical protein
AFLA_020680	52.9508	61.9253	57.1607	0.187066	0.876886	up	no	0.0472207	0.93643	up	no	deacetylase complex subunit Sds3, putative
AFLA_020690	676.981	725.32	498.149	0.111137	1	up	no	-0.441756	0.218408	down	no	extracellular serine-threonine rich protein
AFLA_020700	54.8474	56.9076	46.9193	0.0253499	1	up	no	-0.230773	0.470154	down	no	conserved hypothetical protein
AFLA_020710	39.4684	79.9048	49.5781	0.976853	0.17035	up	no	0.263534	0.57427	up	no	conserved hypothetical protein
AFLA_020720	659.036	807.3	960.359	0.242731	0.870673	up	no	0.469831	0.136308	up	no	conserved hypothetical protein
AFLA_020730	217.78	196.385	215.689	-0.189597	0.954083	down	no	-0.0734222	0.881123	down	no	conserved hypothetical protein
AFLA_020740	1.49603	1.64126	2.94425	0.0754667	1	up	no	0.923643	0.0666198	up	no	ubiquitin conjugating enzyme, putative
AFLA_020750	47.5514	56.4853	50.9047	0.226769	0.886937	up	no	0.068707	0.945824	up	no	DUF1168 domain protein
AFLA_020760	123.544	78.5431	88.6928	-0.661489	0.393303	down	no	-0.485918	0.0638727	down	no	t-complex protein 1, gamma subunit (Cct3), putative
AFLA_020770	2.74288	13.3123	8.22311	2.29719	0.000674892	up	yes	1.54655	0.00471169	up	yes	conserved hypothetical protein
AFLA_020780	45.6334	50.2106	63.0986	0.134719	1	up	no	0.459703	0.25742	up	no	dioxygenase, putative
AFLA_020790	26.0976	40.5258	33.46	0.658053	0.425389	up	no	0.359593	0.398234	up	no	mitochondrial chaperone BCS1, putative
AFLA_020800	20.8387	17.9601	36.6805	-0.273233	0.957661	down	no	0.714236	0.119756	up	no	conserved hypothetical protein
AFLA_020810	0.791252	0.925826	0.687452	0.19701	1	up	no	-0.198538	0.870876	down	no	conserved proline-rich protein
AFLA_020820	2.1767	1.11786	1.07433	-0.961581	0.387691	down	no	-0.988443	0.106139	down	no	cell wall protein TIR4 precursor, putative
AFLA_020830	35.9505	33.3085	29.634	-0.148747	0.937804	down	no	-0.312318	0.324336	down	no	GTPase activating protein (Gyp3), putative
AFLA_020840	329.417	502.898	581.046	0.552488	0.688084	up	no	0.722845	0.0179794	up	no	ubiquitin conjugating enzyme (UbcB), putative
AFLA_020850	43.1301	68.552	67.4312	0.650417	0.402377	up	no	0.594081	0.132762	up	no	Signal peptidase I
AFLA_020860	3.33862	4.68132	9.67597	0.356211	0.96081	up	no	1.43153	0.0520239	up	no	RTA1 domain protein, putative
AFLA_020870	24.5681	15.7672	12.1511	-0.651792	0.405142	down	no	-1.02747	0.000168637	down	yes	kinesin family protein
AFLA_020880	6.73105	4.54698	4.55104	-0.587134	0.588915	down	no	-0.563976	0.0793913	down	no	transcriptional corepressor of histone genes (Hir3), putative
AFLA_020890	28.0345	49.7844	51.3607	0.830412	0.237452	up	no	0.847014	0.00411262	up	no	clathrin-coated vesiclec protein (Bud7), putative
AFLA_020900	214.996	264.908	199.316	0.245331	0.870104	up	no	-0.204054	0.806254	down	no	major centromere autoantigen B, putative
AFLA_020910	9.90436	5.29834	8.00279	-0.913071	0.260536	down	no	-0.300446	0.484483	down	no	C6 transcription factor, putative
AFLA_020920	3.64487	3.042	3.12916	-0.268911	0.88471	down	no	-0.2212	0.807785	down	no	nucleoside-diphosphate-sugar epimerase, putative
AFLA_020930	17.5107	27.9282	12.2104	0.618372	0.463053	up	no	-0.573499	0.468449	down	no	conserved hypothetical protein
AFLA_020940	14.5105	22.2447	9.33249	0.535648	0.67635	up	no	-0.714917	0.159103	down	no	conserved hypothetical protein
AFLA_020950	5.95128	8.15637	3.94557	0.469267	0.78691	up	no	-0.585363	0.249459	down	no	DNA repair protein Mus81, putative
AFLA_020960	5.06771	3.51872	5.6003	-0.566494	0.606629	down	no	0.119263	0.896319	up	no	copper resistance-associated P-type ATPase, putative
AFLA_020970	13.5969	9.20655	13.0664	-0.585336	0.590119	down	no	-0.0573637	0.895436	down	no	transcription factor TFIIIB complex subunit Brf1, putative
AFLA_020980	103.983	169.997	150.796	0.686108	0.407891	up	no	0.506776	0.0854171	up	no	conserved hypothetical protein
AFLA_020990	269.318	368.304	383.657	0.443966	0.711265	up	no	0.492212	0.0915756	up	no	DUF250 domain membrane protein
AFLA_021000	85.4064	144.983	152.217	0.766504	0.321178	up	no	0.8103	0.0027473	up	no	conserved hypothetical protein
AFLA_021010	36.4329	221.836	140.266	2.60826	8.65e-07	up	yes	1.88662	1.75e-07	up	yes	hypothetical protein
AFLA_021020	8.59059	16.3385	11.8977	0.883177	0.435022	up	no	0.381031	0.53234	up	no	hypothetical protein
AFLA_021030	40.1394	89.9266	61.8006	1.15987	0.100805	up	no	0.567772	0.248267	up	no	serine/threonine protein kinase, putative
AFLA_021040	29.2367	43.2259	36.1615	0.557991	0.527573	up	no	0.286127	0.484695	up	no	C6 finger domain protein Acr-2, putative
AFLA_021050	20.1383	29.8776	32.871	0.531597	0.577996	up	no	0.638798	0.212754	up	no	hypothetical protein
AFLA_021060	2.30255	3.47404	1.74776	0.532685	0.923589	up	no	-0.427789	0.904909	down	no	hypothetical protein
AFLA_021070	9.9605	7.87004	6.03119	-0.342963	0.937985	down	no	-0.753033	0.40625	down	no	hypothetical protein
AFLA_021080	2156.35	1357.09	1649.05	-0.653999	0.552862	down	no	-0.400465	0.143939	down	no	ribosomal S30/ubiquitin fusion
AFLA_021090	5.68786	3.93343	1.57251	-0.480747	0.789134	down	no	-1.83853	0.000200905	down	yes	sporulation associated protein
AFLA_021100	7.80875	2.18676	0.797295	-1.80123	0.146398	down	no	-3.272	2.17e-22	down	yes	prostaglandin G/H synthase 2/cyclooxygenase 2, pgh2/cox2, putative
AFLA_021110	18.384	15.854	13.6786	-0.213753	0.863822	down	no	-0.427392	0.189781	down	no	histone transcription regulator Hir1, putative
AFLA_021120	35.0088	61.9041	62.3874	0.818235	0.247061	up	no	0.806406	0.011556	up	no	stomatin family protein
AFLA_021130	66.8076	29.2173	24.5774	-1.23048	0.242485	down	no	-1.44026	2.08e-10	down	yes	lupus la ribonucleoprotein, putative
AFLA_021140	9.04223	12.9178	16.1796	0.531564	0.582477	up	no	0.831462	0.0207936	up	no	UPF0171 domain protein
AFLA_021150	53.8859	128.561	149.699	1.25653	0.0633532	up	no	1.43291	3.43e-05	up	yes	cytochrome c oxidase assembly protein Cox19, putative
AFLA_021160	49.6491	82.6758	98.6956	0.673744	0.500292	up	no	0.935704	0.122086	up	no	aldehyde reductase (AKR1), putative
AFLA_021170	0.0385736	0	0.0374073	#NAME?	1	down	no	-0.0333335	1	down	no	hypothetical protein
AFLA_021180	0.549336	1.6669	0.757886	1.53279	0.462498	up	no	0.351807	0.948398	up	no	profilin, putative
AFLA_021190	17.7776	19.039	17.4959	0.101488	0.984411	up	no	-0.0460264	0.957427	down	no	PAP2 domain protein
AFLA_021200	27.9751	35.5171	36.5534	0.358307	0.756789	up	no	0.369894	0.468027	up	no	conserved hypothetical protein
AFLA_021210	191.72	117.741	171.612	-0.737018	0.376898	down	no	-0.215202	0.635521	down	no	ankyrin repeat protein
AFLA_021220	22.0769	25.4199	19.5978	0.156241	0.971431	up	no	-0.208231	0.633838	down	no	tRNA ligase
AFLA_021230	46.3945	59.078	50.7236	0.332159	0.809907	up	no	0.107391	0.934732	up	no	hypothetical protein
AFLA_021240	84.8529	110.764	69.7223	0.38602	0.734929	up	no	-0.318455	0.297346	down	no	HLH transcription factor (GlcD gamma), putative
AFLA_021250	177.54	337.567	316.355	0.904569	0.183372	up	no	0.777893	0.00436747	up	no	mitochondrial 2-oxodicarboxylate carrier protein, putative
AFLA_021260	6.84235	7.07296	9.28246	0.067052	1	up	no	0.435684	0.456659	up	no	GPI anchored protein, putative
AFLA_021270	0.494736	0.54297	0.903245	0.102709	1	up	no	0.844417	0.890466	up	no	hypothetical protein
AFLA_021280	0	0	0.0948028					Inf	1	up	no	conserved hypothetical protein
AFLA_021290	29.4816	18.4563	9.28398	-0.695734	0.431427	down	no	-1.69604	5.64e-05	down	yes	conserved hypothetical protein
AFLA_021300	0.979358	0.413439	0.762013	-1.29182	0.262354	down	no	-0.417909	0.663011	down	no	piwil3 protein, putative
AFLA_021310	27.2843	6.44515	7.62073	-2.09644	0.000246083	down	yes	-1.8565	2.98e-10	down	yes	conserved hypothetical protein
AFLA_021320	477.557	13.7347	15.8413	-5.23668	0.000226109	down	yes	-4.98567	6.38e-39	down	yes	NAD dependent epimerase/dehydratase, putative
AFLA_021330	55.153	57.4395	65.6138	0.0594252	1	up	no	0.232757	0.568897	up	no	conserved hypothetical protein
AFLA_021340	9.38949	10.4988	13.2255	0.175437	0.980981	up	no	0.503064	0.320217	up	no	C6 transcription factor (Acr-2), putative
AFLA_021350	13.2067	7.26018	4.62518	-0.830951	0.395203	down	no	-1.51304	6.94e-05	down	yes	transulfuration enzyme family protein, putative
AFLA_021360	119.608	217.326	163.654	0.870449	0.291276	up	no	0.409997	0.190787	up	no	transcriptional regulator, putative
AFLA_021370	6.75244	8.316	14.5382	0.29811	0.847737	up	no	1.07358	0.0212781	up	yes	O-acetyltransferase, putative
AFLA_021380	0.432998	0.413989	0	0.0909487	1	up	no	#NAME?	0.709707	down	no	hypothetical protein
AFLA_021390	36.1307	50.6663	28.9124	0.452555	0.781361	up	no	-0.411977	0.214249	down	no	dihydroxy-acid dehydratase, putative
AFLA_021400	8.4994	14.0632	9.99757	0.686739	0.455387	up	no	0.148796	0.824068	up	no	vanillate O-demethylase oxidoreductase, putative
AFLA_021410	4.06524	6.29316	5.24165	0.606229	0.627502	up	no	0.32942	0.66828	up	no	conserved hypothetical protein
AFLA_021430	0	0	0.117863					Inf	1	up	no	conserved hypothetical protein
AFLA_021440	0.20115	0.0509585	0.113133	-1.99795	0.575483	down	no	-0.829028	0.737854	down	no	hypothetical protein
AFLA_021460	0.14466	0.267374	0.0577181	0.832879	0.704416	up	no	-1.36705	0.567194	down	no	phosphate-repressible Na+/phosphate cotransporter Pho89, putative
AFLA_021470	1.7953	5.81251	4.52629	1.73764	0.0866397	up	no	1.32869	0.0664846	up	no	conserved hypothetical protein
AFLA_021480	19.1032	32.939	27.9474	0.794572	0.268696	up	no	0.526298	0.0938781	up	no	actin-interacting protein (Bud6/Aip3), putative
[truncated: 11,209 more rows]

## Sheet: Differentially expressed genes 
a: the average from each genes triplicate FPKM value. P: untreated A. flavus samples, P02: 0.2% (w/v) gallic acid treated A. flavus samples, P08: 0.8% (w/v) gallic acid treated A. flavus samples.
b: genes expression level in P02 compare with P, ratio: the mean value of the count number of each gene in P02/in P, significant: gene with |log2Ratio|≥1 and q<0.05 was consider as significantly differentially expressed, described as 'yes".
c: genes expression level in P08 compare with P, ratio: the mean value of the count number of each gene in P08/in P, significant: gene with |log2Ratio|≥1 and q<0.05 was consider as significantly differentially expressed, described as 'yes".
	FPKMa			P02_Pb				P08_Pc
Gene ID	P	P02	P08	Log2 ratio	p value	Up/Down	Significant	Log2 ratio	p value	Up/Down	Significant	Description
AFLA_001690	54.203	12.5689	29.2425	-2.07437	0.0011718	down	yes	-0.849006	0.00360583	down	no	conserved hypothetical protein
AFLA_001850	10.777	29.3666	8.83307	1.45414	0.0286243	up	yes	-0.321535	0.684555	down	no	conserved hypothetical protein
AFLA_002560	2573.76	901.635	1620.8	-1.49698	0.017667	down	yes	-0.666038	0.00402482	down	no	60S ribosomal protein L37a
AFLA_003260	71.9324	187.322	97.1143	1.38787	0.0436959	up	yes	0.392323	0.188441	up	no	rhomboid family membrane protein
AFLA_003980	63.1142	15.4047	58.561	-2.08831	0.000113356	down	yes	-0.160498	0.706992	down	no	cation efflux protein/ zinc transporter, putative
AFLA_005030	2.21504	0.611408	1.09107	-1.86859	0.0343908	down	yes	-1.05749	0.174276	down	no	conserved hypothetical protein
AFLA_005320	0.343849	1.18832	0.631824	1.72999	0.0103632	up	yes	0.808582	0.177302	up	no	polyketide synthase, putative
AFLA_006040	26.4468	89.1751	51.7047	1.74545	0.000650073	up	yes	0.932344	0.0040121	up	no	conserved hypothetical protein
AFLA_009800	1.31116	0.242276	0.432358	-2.48029	0.0375171	down	yes	-1.62823	0.190588	down	no	conserved hypothetical protein
AFLA_010990	2.7435	9.78214	3.08091	1.84701	0.00491057	up	yes	0.139925	0.922297	up	no	glucose-methanol-choline (gmc) oxidoreductase, putative
AFLA_011400	6.52594	1.55589	6.31459	-2.0668	0.0332989	down	yes	-0.0421464	1	down	no	conserved hypothetical protein
AFLA_012370	84.0662	34.2016	45.7741	-1.33983	0.0296418	down	yes	-0.911057	0.00118082	down	no	conserved hypothetical protein
AFLA_014210	14.386	4.02755	7.55581	-1.87333	0.00521016	down	yes	-1.00153	0.197545	down	no	MFS transporter, putative
AFLA_014460	1.58198	8.15114	1.76328	2.29724	0.00111608	up	yes	0.0891109	0.98057	up	no	dimethylaniline monooxygenase, putative
AFLA_014490	2.15078	6.95328	2.98333	1.68965	0.0118902	up	yes	0.466913	0.58945	up	no	conserved hypothetical protein
AFLA_014500	24.7425	112.476	49.9181	2.15603	0.00149757	up	yes	0.937599	0.00252081	up	no	plasma membrane channel protein (Aqy1), putative
AFLA_014980	39.3938	16.3627	24.265	-1.29331	0.0441467	down	yes	-0.727282	0.0169874	down	no	conserved hypothetical protein
AFLA_015110	17.919	82.8164	28.6331	2.19014	0.0103632	up	yes	0.592996	0.381897	up	no	conserved hypothetical protein
AFLA_017580	25.9741	63.3584	45.2762	1.26456	0.0255799	up	yes	0.751434	0.0548289	up	no	conserved hypothetical protein
AFLA_017590	44.7917	111.877	82.5719	1.28809	0.0209741	up	yes	0.816562	0.00575522	up	no	integral membrane protein, Mpv17/PMP22 family, putative
AFLA_018490	110.362	464.812	269.174	2.0139	0.0124774	up	yes	1.2019	0.0687996	up	no	conserved hypothetical protein
AFLA_018500	14.1163	39.4094	24.8136	1.44884	0.00816503	up	yes	0.745398	0.0427604	up	no	conserved hypothetical protein
AFLA_019440	238.285	83.2168	180.168	-1.51092	0.0225999	down	yes	-0.401395	0.140482	down	no	conserved hypothetical protein
AFLA_020160	0.390671	2.98613	1.34255	2.88612	0.0313995	up	yes	1.79019	0.146665	up	no	conserved hypothetical protein
AFLA_020310	36.6967	88.1616	72.5517	1.25906	0.0288883	up	yes	0.943966	0.00153291	up	no	F-box domain protein
AFLA_021940	66.7758	226.602	93.586	1.79105	0.00296279	up	yes	0.460489	0.200451	up	no	conserved hypothetical protein
AFLA_022680	29.1014	80.8287	48.6498	1.45261	0.00816503	up	yes	0.689085	0.0651297	up	no	metalloprotease MEP1
AFLA_023990	36.0591	7.45446	21.893	-2.27867	0.00289833	down	yes	-0.750342	0.183377	down	no	conserved hypothetical protein
AFLA_024750	22.009	7.01966	15.3711	-1.60874	0.0343908	down	yes	-0.482025	0.208062	down	no	cytochrome P450 phenylacetate 2-hydroxylase, putative
AFLA_028890	35.1411	8.76787	10.82	-1.97769	0.00517043	down	yes	-1.70328	0.16363	down	no	tartrate dehydrogenase, putative
AFLA_029780	52.6643	201.845	95.216	1.90789	0.00687808	up	yes	0.781041	0.00850433	up	no	Patatin-like serine hydrolase, putative
AFLA_030140	1496.75	555.855	754.178	-1.42601	0.0330514	down	yes	-0.974701	1.4e-05	down	no	60S ribosomal protein P0
AFLA_030430	12.7494	3.22985	4.9858	-2.02682	0.000346182	down	yes	-1.40564	0.0724861	down	no	fatty acid oxygenase PpoC, putative
AFLA_032000	16.2626	86.0721	26.5849	2.41855	3.61e-05	up	yes	0.68002	0.0731786	up	no	calcium-translocating P-type ATPase(PMCA-type),putative
AFLA_032910	44.7243	127.814	78.4343	1.53486	0.0255253	up	yes	0.77489	0.072181	up	no	hypothetical protein
AFLA_033330	21.0614	6.47576	11.5722	-1.70609	0.0101677	down	yes	-0.864701	0.0292812	down	no	tRNAHis guanylyltransferase Thg1, putative
AFLA_033710	22.9016	61.8067	42.3908	1.45169	0.0268124	up	yes	0.884083	0.0331812	up	no	conserved hypothetical protein
AFLA_034340	2285.75	795.023	1263.97	-1.50486	0.025434	down	yes	-0.842938	0.000247485	down	no	40S ribosomal protein S10b
AFLA_034840	31.1246	87.016	51.7472	1.5198	0.0250931	up	yes	0.728719	0.212193	up	no	conserved hypothetical protein
AFLA_035030	18.8633	54.8017	37.2447	1.57464	0.0169571	up	yes	0.976194	0.0312842	up	no	ACN9 family domain containing protein, putative
AFLA_035970	14.8992	49.7534	22.5176	1.72737	0.00286208	up	yes	0.565376	0.100416	up	no	WD repeat protein
AFLA_036090	25.7957	5.95594	22.2953	-2.06503	0.00189098	down	yes	-0.186943	0.659239	down	no	homogentisate 1,2-dioxygenase (HmgA), putative
AFLA_036100	58.4876	15.2047	38.9861	-1.9183	0.00281645	down	yes	-0.569209	0.101983	down	no	conserved hypothetical protein
AFLA_036110	47.74	7.09994	37.3131	-2.73649	0.00183591	down	yes	-0.333227	0.630426	down	no	4-hydroxyphenylpyruvate dioxygenase, putative
AFLA_036240	65.3989	183.751	109.596	1.48317	0.0187751	up	yes	0.683156	0.130193	up	no	conserved hypothetical protein
AFLA_038650	10.8211	38.5309	22.1045	1.85343	0.00315327	up	yes	1.01849	0.102749	up	no	aspartic-type endopeptidase, putative
AFLA_039190	10.437	2.05549	14.5263	-2.38328	0.00903654	down	yes	0.441578	0.530054	up	no	conserved hypothetical protein
AFLA_039300	330.559	108.775	108.361	-1.66776	0.0386929	down	yes	-1.71172	0.0652284	down	no	conserved hypothetical protein
AFLA_039360	3.38275	10.3388	3.90505	1.57045	0.00526219	up	yes	0.157145	0.836486	up	no	multidrug resistance protein 1, 2, putative
AFLA_039650	245.121	1142.75	176.308	2.22062	0.00121019	up	yes	-0.529783	0.097068	down	no	NADH-cytochrome B5 reductase, putative
AFLA_041970	8.87461	24.2918	9.38452	1.42988	0.0387678	up	yes	0.0406067	0.988387	up	no	chitin binding protein, putative
AFLA_042750	15.1319	36.7228	23.8804	1.24838	0.0362045	up	yes	0.601582	0.103459	up	no	conserved hypothetical protein
AFLA_043150	2370.77	848.753	1373.53	-1.47995	0.0169571	down	yes	-0.777839	0.000589279	down	no	40S ribosomal protein S10a
AFLA_044170	1845.63	518.527	961.964	-1.82306	0.00153022	down	yes	-0.928369	2.38e-05	down	no	40S ribosomal protein S11
AFLA_045120	79.8109	23.3017	31.4099	-1.86152	0.00992175	down	yes	-1.4667	0.0718662	down	no	conserved hypothetical protein
AFLA_045500	0.0472296	0.59877	0.201915	3.58316	0.0257572	up	yes	2.03329	0.354868	up	no	cytochrome P450, putative
AFLA_045770	30.1745	70.0177	53.4288	1.20037	0.0449553	up	yes	0.791294	0.0136954	up	no	mitochondrial carrier protein, putative
AFLA_046290	7.46638	34.6252	12.5945	2.25641	0.0019748	up	yes	0.779917	0.346213	up	no	conserved hypothetical protein
AFLA_047300	28.8348	10.2072	18.2523	-1.48041	0.0415074	down	yes	-0.635695	0.0705094	down	no	serine/threonine protein kinase (Ark1), putative
AFLA_048630	70.1558	26.0085	36.0552	-1.43242	0.0445098	down	yes	-0.946113	0.00157094	down	no	conserved hypothetical protein
AFLA_050180	78.6123	30.2579	59.0263	-1.42816	0.042947	down	yes	-0.496671	0.450771	down	no	calcium transporter, putative
AFLA_050300	14.1417	45.6854	26.2409	1.72858	0.00549727	up	yes	0.882565	0.0136565	up	no	HMG box protein, putative
AFLA_050800	1030.34	399.218	805.634	-1.36031	0.031754	down	yes	-0.34263	0.203085	down	no	40S ribosomal protein S12
AFLA_051730	276.736	826.841	576.646	1.56009	0.0137388	up	yes	0.992905	0.000349532	up	no	conserved hypothetical protein
AFLA_052640	32.0951	77.9387	41.2061	1.26606	0.0362695	up	yes	0.321366	0.33205	up	no	PH domain protein
AFLA_054760	1709.48	658.395	917.866	-1.37098	0.03861	down	yes	-0.900768	4.47e-05	down	no	60S ribosomal protein L28
AFLA_057600	414.582	1216.99	837.025	1.53546	0.0352157	up	yes	0.994834	0.100295	up	no	heat shock protein, putative
AFLA_057790	49.9967	16.2984	26.9588	-1.70457	0.0179622	down	yes	-0.999522	0.000239059	down	no	carboxylesterase, putative
AFLA_057900	57.2507	14.7413	17.7847	-2.0766	0.00494095	down	yes	-1.84912	0.325963	down	no	glutathione S-transferase GST-6.0, putative
AFLA_059990	9.90618	1.57055	5.94923	-2.78415	0.00286208	down	yes	-0.94282	0.846613	down	no	O-methyltransferase, putative
AFLA_060100	68.9522	20.0449	25.0293	-1.85982	0.0120534	down	yes	-1.5863	0.351241	down	no	hypothetical protein
AFLA_060340	42.9519	268.689	91.9795	2.61488	0.0280548	up	yes	1.00455	0.177605	up	no	conserved hypothetical protein
AFLA_060680	72.3913	10.7934	57.2471	-2.72994	2.05e-07	down	yes	-0.334921	0.546127	down	no	dimethylallyl tryptophan synthase, putative
AFLA_060690	53.0087	14.9161	62.7445	-1.80324	0.00348414	down	yes	0.259202	0.698354	up	no	cytochrome P450, putative
AFLA_060700	57.687	16.7197	35.893	-1.75413	0.00611808	down	yes	-0.656073	0.0332683	down	no	phenylalanine ammonia-lyase, putative
AFLA_062610	38.0504	12.5199	22.5268	-1.69702	0.0491484	down	yes	-0.870491	0.0259488	down	no	competence/damage-inducible protein CinA, putative
AFLA_065160	0.0941227	0.73149	0.199212	2.9447	0.03861	up	yes	1.07004	0.676915	up	no	hypothetical protein
AFLA_065440	10.7163	2.40183	10.3193	-2.24052	0.0434538	down	yes	-0.173518	0.962936	down	no	conserved hypothetical protein
AFLA_065740	162.721	56.1238	94.5859	-1.62996	0.0137335	down	yes	-0.876188	0.00033282	down	no	7-dehydrocholesterol reductase, putative
AFLA_065850	14.147	33.2548	21.7596	1.23028	0.0432103	up	yes	0.604664	0.169602	up	no	sensor histidine kinase/response regulator, putative
AFLA_065950	32.2107	8.42617	16.7436	-1.92765	0.00190938	down	yes	-0.924005	0.00188024	down	no	conserved hypothetical protein
AFLA_066210	1.25414	0.151145	1.24671	-3.04539	0.0115975	down	yes	0.00658901	1	up	no	class II DAHP synthetase family protein
AFLA_066700	5.8348	0.394905	0.777474	-3.87412	0.0160233	down	yes	-2.87118	0.0690859	down	no	P450 family sporulation-specific N-formyltyrosine oxidase Dit2
AFLA_066720	0.406917	0.109949	0.123949	-1.88054	0.025434	down	yes	-1.70541	0.0731331	down	no	nonribosomal peptide synthase, putative
AFLA_068000	2429.43	855.865	1485.62	-1.49648	0.0306189	down	yes	-0.707708	0.0033426	down	no	60S ribosomal protein L1
AFLA_069190	74.2433	196.666	122.17	1.38751	0.0247826	up	yes	0.66467	0.0354353	up	no	vesicle transport v-SNARE protein Gos1, putative
AFLA_070080	14.9878	64.0942	24.9719	2.06361	0.000373925	up	yes	0.694899	0.203222	up	no	conserved hypothetical protein
AFLA_070780	74.2541	29.251	90.5067	-1.40362	0.0198018	down	yes	0.222156	0.552885	up	no	acetamidase, putative
AFLA_071000	29.1373	88.3406	48.137	1.58815	0.0163478	up	yes	0.681686	0.0356611	up	no	membrane bound C2 domain protein (vp115), putative
AFLA_072420	1.09938	0.155286	0.218983	-2.83623	0.00195649	down	yes	-2.33768	0.0578063	down	no	hypothetical protein
AFLA_072730	0.123259	0.966662	0.493279	2.87476	0.0297111	up	yes	1.93552	0.1185	up	no	amino acid transporter, putative
AFLA_073340	57.2041	143.232	93.3828	1.35257	0.0366978	up	yes	0.702405	0.0341944	up	no	conserved hypothetical protein
AFLA_073450	65.8291	17.0903	58.6168	-1.89149	0.00327683	down	yes	-0.134002	0.715645	down	no	copper amine oxidase, putative
AFLA_074520	9.77012	1.19081	1.68725	-3.03866	1.1e-05	down	yes	-2.54824	0.0553794	down	no	alpha-galactosidase, putative
AFLA_075610	77.2986	185.838	153.864	1.2517	0.0316034	up	yes	0.956814	0.00355863	up	no	conserved hypothetical protein
AFLA_075840	102.225	19.038	52.9022	-2.42477	1.73e-06	down	yes	-0.958056	0.0340241	down	no	hyaluronan synthase, putative
AFLA_075900	6.94812	23.273	14.0496	1.74983	0.00476924	up	yes	0.969931	0.0215951	up	no	conserved hypothetical protein
AFLA_078060	2.79106	7.9323	5.58814	1.48785	0.0250931	up	yes	0.952541	0.0707157	up	no	FAD-binding oxidoreductase, putative
AFLA_078140	19.9359	4.89571	12.5271	-2.12612	0.0113114	down	yes	-0.812052	0.567112	down	no	acetyltransferase, GNAT family
AFLA_078270	73.0502	208.194	119.951	1.47766	0.0205829	up	yes	0.653381	0.0214714	up	no	myosin I MyoA/Myo5
AFLA_078920	192.795	788.709	388.868	2.06493	0.00992767	up	yes	0.994915	0.121867	up	no	C2H2 finger domain protein, putative
AFLA_079110	25.9916	62.4753	51.2868	1.28327	0.031484	up	yes	0.975784	0.0034493	up	no	conserved hypothetical protein
AFLA_079880	2126.18	829.698	1506.97	-1.34209	0.0445098	down	yes	-0.494452	0.0470528	down	no	60S ribosomal protein L22, putative
AFLA_081980	1.16304	0.166711	0.348022	-2.87671	0.0465997	down	yes	-1.81855	0.274915	down	no	ferulic acid esterase (FaeA), putative
AFLA_082190	28.0931	4.29516	13.3145	-2.83227	4.85e-05	down	yes	-1.22186	0.566972	down	no	conserved hypothetical protein
AFLA_082200	151.223	13.9266	43.1145	-3.59859	9.37e-08	down	yes	-1.9887	0.381136	down	no	AAA family ATPase, putative
AFLA_082410	13.2079	3.92701	7.02271	-1.77026	0.0103553	down	yes	-0.952458	0.195471	down	no	conserved hypothetical protein
AFLA_083110	5.02634	33.5375	13.6734	2.73193	0.00121071	up	yes	1.45735	0.0862222	up	no	conidiation-specific protein (Con-10), putative
AFLA_083400	53.439	169.477	61.8579	1.64488	0.00691807	up	yes	0.15143	0.759262	up	no	Auxin Efflux Carrier superfamily
AFLA_084230	31.1897	7.43532	16.8715	-2.16928	0.00122185	down	yes	-0.995713	0.486213	down	no	homoserine acetyltransferase family protein
AFLA_084320	3.89661	14.187	6.23008	1.83887	0.049845	up	yes	0.65922	0.459499	up	no	hypothetical protein
AFLA_084630	12.9155	30.5929	23.2467	1.23571	0.0372926	up	yes	0.810991	0.0044216	up	no	AMP binding domain protein, putative
AFLA_084840	67.6743	274.441	87.6094	2.02278	0.00149757	up	yes	0.330067	0.432324	up	no	conserved hypothetical protein
AFLA_087870	20.2933	56.2641	32.6048	1.45717	0.00866802	up	yes	0.637749	0.0793567	up	no	endoglucanase, putative
AFLA_089580	2.57308	9.84989	4.42181	1.90718	0.0079783	up	yes	0.785622	0.202986	up	no	conserved hypothetical protein
AFLA_090040	16.4768	4.09093	7.17117	-2.06397	0.00125643	down	yes	-1.26935	0.0747362	down	no	hypothetical protein
AFLA_091000	55.7603	16.5715	41.3092	-1.74905	0.001485	down	yes	-0.443277	0.136386	down	no	cytochrome P450 monooxygenase, putative
AFLA_092640	45.6607	109.593	73.4221	1.26753	0.0442702	up	yes	0.654423	0.0271765	up	no	alkaline phosphatase Pho8
AFLA_093460	136.75	739.213	227.011	2.39901	0.000133614	up	yes	0.662019	0.149259	up	no	conserved hypothetical protein
AFLA_093470	24.5567	91.8693	47.9449	1.90466	0.000190593	up	yes	0.938565	0.00180369	up	no	decapping enzyme Dcp2, putative
AFLA_098080	3.26454	12.4153	4.20897	1.90684	0.00832303	up	yes	0.313106	0.784705	up	no	conserved hypothetical protein
AFLA_098090	71.1198	233.511	140.022	1.69603	0.00668104	up	yes	0.910847	0.000768082	up	no	BAR adaptor protein RVS167, putative
AFLA_098430	130.452	54.4983	67.8317	-1.26746	0.0378227	down	yes	-0.952068	0.000195249	down	no	ankyrin repeat protein (Yar1), putative
AFLA_099220	106.721	320.699	158.605	1.56583	0.0194133	up	yes	0.505033	0.0941969	up	no	conserved hypothetical protein
AFLA_099270	52.0666	21.2458	35.1345	-1.32464	0.0339983	down	yes	-0.606731	0.041674	down	no	isovaleryl-CoA dehydrogenase IvdA, putative
AFLA_099930	3.62044	24.9311	5.65076	2.81734	5.7e-05	up	yes	0.615593	0.494688	up	no	conserved hypothetical protein
AFLA_099970	3.04377	12.7806	4.17938	2.08599	0.00660016	up	yes	0.484498	0.605192	up	no	thiol methyltransferase, putative
AFLA_100680	119.517	40.8469	66.5703	-1.65039	0.0220022	down	yes	-0.968895	0.116442	down	no	conserved hypothetical protein
AFLA_101160	1445.38	506.224	907.95	-1.48957	0.0187751	down	yes	-0.65707	0.00493019	down	no	40S ribosomal protein S9
AFLA_101460	1.63723	9.45707	3.09312	2.58616	0.0163478	up	yes	0.896262	0.529855	up	no	hypothetical protein
AFLA_101630	14.7999	5.54923	10.5453	-1.45041	0.0449521	down	yes	-0.534986	0.603664	down	no	conserved hypothetical protein
AFLA_101640	36.1575	9.518	19.9227	-2.033	0.00923844	down	yes	-0.972327	0.494844	down	no	conserved hypothetical protein
AFLA_102850	80.045	241.77	140.712	1.58926	0.0160233	up	yes	0.767761	0.00522739	up	no	Rho GTPase activator (Rgd1), putative
AFLA_103000	90.4114	220.772	155.935	1.25971	0.0331341	up	yes	0.724469	0.0412875	up	no	ubiquinone biosynthesis protein, putative
AFLA_103540	86.3659	35.0756	50.1764	-1.30487	0.0249851	down	yes	-0.778157	0.00243358	down	no	RNA binding protein Rnp24, putative
AFLA_105000	5.78044	1.14601	9.51384	-2.4137	0.0225999	down	yes	0.651942	0.344022	up	no	DUF636 domain protein
AFLA_107560	20.0446	7.47199	12.6012	-1.45471	0.0357714	down	yes	-0.710194	0.0673575	down	no	oxidoreductase, 2OG-Fe(II) oxygenase family, putative
AFLA_107860	213.029	71.1426	142.309	-1.53598	0.0256351	down	yes	-0.546439	0.0655137	down	no	conserved hypothetical protein
AFLA_108020	0.433164	2.39031	0.854643	2.47648	0.0250078	up	yes	0.986544	0.514951	up	no	conserved hypothetical protein
AFLA_108900	15.4272	37.734	18.1401	1.28278	0.0401232	up	yes	0.186265	0.711325	up	no	ABC transporter, putative
AFLA_110050	9.45653	2.36706	4.93138	-1.96123	0.00610103	down	yes	-0.906627	0.0130647	down	no	sodium P-type ATPase, putative
AFLA_110200	6.77214	0	10.5794	#NAME?	0.000358503	down	yes	0.465625	0.735235	up	no	hypothetical protein
AFLA_110510	156.734	438.25	319.16	1.4289	0.0226658	up	yes	0.963194	0.016751	up	no	GPI anchored cell wall protein, putative
AFLA_110960	34.861	85.2574	56.3088	1.2944	0.0270839	up	yes	0.660386	0.195381	up	no	lysophospholipase Plb1
AFLA_111980	2139.78	750.513	1444.92	-1.48489	0.0146487	down	yes	-0.5538	0.0192558	down	no	60S ribosomal protein L38, putative
AFLA_112090	965.904	350.608	644.372	-1.44986	0.0296418	down	yes	-0.58626	0.0166107	down	no	60S ribosomal protein L11
AFLA_112960	16.3956	38.6881	31.4767	1.22028	0.0436677	up	yes	0.885259	0.00588859	up	no	amino acid transporter, putative
AFLA_113220	33.4899	75.7072	45.8738	1.1846	0.0477583	up	yes	0.431127	0.265006	up	no	conserved hypothetical protein
AFLA_114220	216.596	2349.19	309.654	3.39479	0.000349781	up	yes	0.563603	0.669217	up	no	hypothetical protein
AFLA_114940	44.2547	144.588	73.1412	1.69491	0.00195649	up	yes	0.674443	0.104789	up	no	hypothetical protein
AFLA_115990	3.85676	13.7591	4.81073	1.86362	0.0115975	up	yes	0.281762	0.756039	up	no	conserved hypothetical protein
AFLA_116150	10.8771	45.6145	20.9519	2.1018	0.00407652	up	yes	0.931091	0.0799215	up	no	integral membrane protein
AFLA_118060	46.5637	12.2941	11.5832	-1.87483	0.0103166	down	yes	-1.96919	0.0874464	down	no	dihydroflavonal-4-reductase, putative
AFLA_118340	70.1496	8.777	25.1437	-2.95476	5.53e-07	down	yes	-1.47249	0.105539	down	no	flavin containing polyamine oxidase, putative
AFLA_121250	13.2176	4.62756	9.17123	-1.62017	0.0415074	down	yes	-0.645488	0.813292	down	no	conserved hypothetical protein
AFLA_121980	5.72682	0.545679	0.722585	-3.47775	0.000357857	down	yes	-3.12076	0.0520383	down	no	short chain dehydrogenase, putative
AFLA_122200	7.60006	1.71601	7.21776	-2.27272	0.0323702	down	yes	-0.217307	0.93184	down	no	conserved hypothetical protein
AFLA_122210	14.3362	4.40974	12.0472	-1.79017	0.0434538	down	yes	-0.37631	0.66338	down	no	oxidoreductase, putative
AFLA_122400	77.6898	27.233	40.1062	-1.46997	0.0274029	down	yes	-0.936649	0.000135447	down	no	glucan 1,4-alpha-glucosidase, putative
AFLA_124080	64.6698	185.583	86.6311	1.55514	0.0179622	up	yes	0.426331	0.236144	up	no	amino acid transporter, putative
AFLA_124260	0.043931	0.400733	0.0302741	3.30915	0.0476173	up	yes	-0.423503	1	down	no	adam, putative
AFLA_124470	1.07935	0	0.205048	#NAME?	0.0476173	down	yes	-2.44027	0.384386	down	no	conserved hypothetical protein
AFLA_124520	3.6092	1.08995	1.76635	-1.77745	0.0454106	down	yes	-1.09326	0.135894	down	no	tubulin, putative
AFLA_124990	90.9813	9.62575	95.8366	-3.15635	0.00265249	down	yes	0.142239	0.893073	up	no	hypothetical protein
AFLA_125270	1.38403	0.12077	0.359401	-3.47932	0.00424374	down	yes	-1.94441	0.0554494	down	no	tyrosinase
AFLA_125360	49.7606	14.4826	49.5941	-1.8732	0.0491484	down	yes	-0.121057	0.875595	down	no	hypothetical protein
AFLA_126060	5.74216	1.49234	1.67629	-2.07788	0.0251909	down	yes	-1.93436	0.17355	down	no	conserved hypothetical protein
AFLA_126500	5.93052	23.4783	12.3489	1.92138	0.0290214	up	yes	0.989267	0.121226	up	no	hypothetical protein
AFLA_127220	1772.42	629.112	1270.59	-1.47639	0.0294973	down	yes	-0.473671	0.0638727	down	no	60S ribosomal protein L27e
AFLA_131720	142.31	388.131	266.421	1.43738	0.0142508	up	yes	0.858765	0.0046543	up	no	conserved hypothetical protein
AFLA_132180	45.1435	7.26614	24.0479	-2.58903	3.32e-05	down	yes	-0.874547	0.00326094	down	no	aldehyde dehydrogenase ALDH
AFLA_137640	0.588116	8.29568	3.71968	3.78122	0.0257975	up	yes	2.62167	0.0837088	up	no	conserved hypothetical protein
AFLA_137760	7.50413	19.6656	8.96186	1.3698	0.0470593	up	yes	0.244502	0.792951	up	no	thimet oligopeptidase, putative
AFLA_138560	46.4917	133.029	41.4655	1.51631	0.0149497	up	yes	-0.21671	0.612834	down	no	cholestenol delta-isomerase, putative
AFLA_000330	3.9773	2.85453	1.23587	-0.634906	0.832354	down	no	-1.8196	0.000119382	down	yes	Ankyrin domain protein
AFLA_000350	6.0759	1.54646	0.745785	-2.10717	0.169394	down	no	-3.14273	6.68e-08	down	yes	NAD dependent epimerase/dehydratase, putative
AFLA_000510	3.26363	0.609144	0.0758396	-2.57277	0.340802	down	no	-5.55624	1.47e-05	down	yes	conserved hypothetical protein
AFLA_000520	31.3186	24.5331	13.6193	-0.338871	0.815414	down	no	-1.19302	0.000844207	down	yes	conserved hypothetical protein
AFLA_000640	3.91672	1.94031	1.41206	-1.03482	0.271518	down	no	-1.49321	0.00491379	down	yes	polyamine oxidase, putative
AFLA_000660	0.442653	0.102502	0.0443834	-2.13224	0.259267	down	no	-3.31979	0.0161711	down	yes	benzoate 4-monooxygenase cytochrome P450, putative
AFLA_000700	9.88429	3.98438	3.77817	-1.37262	0.297583	down	no	-1.4687	0.0478707	down	yes	hypothetical protein
AFLA_000710	4.66771	3.14321	2.25763	-0.597866	0.646184	down	no	-1.09113	0.0323554	down	yes	6-hydroxy-D-nicotine oxidase, putative
AFLA_000760	5.94396	10.138	14.8089	0.685715	0.558822	up	no	1.24343	0.00280429	up	yes	MFS transporter, putative
AFLA_000830	13.3358	5.48991	4.03161	-1.25386	0.116164	down	no	-1.70913	6.42e-06	down	yes	conserved hypothetical protein
AFLA_000840	0.910375	1.20444	3.75708	0.374716	0.848568	up	no	2.00587	0.00197219	up	yes	efflux pump antibiotic resistance protein, putative
AFLA_000850	0.931534	0.609762	0.264642	-0.642208	0.734836	down	no	-1.82265	0.0396976	down	yes	conserved hypothetical protein
AFLA_000870	1007.26	272.318	365.559	-2.04005	0.320023	down	no	-1.53672	4.86e-13	down	yes	hypothetical protein
AFLA_001080	0.488627	0.091224	0.0539605	-2.47499	0.268574	down	no	-3.16064	0.000154541	down	yes	glycosyltransferase, putative
AFLA_001090	8.83474	1.95342	1.48167	-2.20952	0.0945572	down	no	-2.56542	1.88e-07	down	yes	conserved hypothetical protein
AFLA_001270	9.35447	5.42252	2.01739	-0.908718	0.698926	down	no	-2.27858	0.000216195	down	yes	hypothetical protein
AFLA_001470	27.9044	44.2154	73.7373	0.641241	0.462766	up	no	1.34371	0.000178736	up	yes	conserved hypothetical protein
AFLA_001520	21.0832	8.38936	9.01111	-1.36151	0.0517872	down	no	-1.27086	0.000237265	down	yes	conserved hypothetical protein
AFLA_001530	12.9977	6.3559	5.80304	-1.02494	0.182727	down	no	-1.17418	0.00434194	down	yes	MFS monocarboxylate transporter, putative
AFLA_001650	3.52675	1.69258	1.41485	-1.04148	0.280787	down	no	-1.3213	0.0133394	down	yes	efflux pump antibiotic resistance protein, putative
AFLA_001740	26.7101	7.03583	5.72038	-1.92906	0.0803097	down	no	-2.1964	8.28e-14	down	yes	arginine permease, putative
AFLA_001820	73.1652	55.7813	35.7226	-0.507098	0.766986	down	no	-1.16714	0.010711	down	yes	hypothetical protein
AFLA_001870	0.469486	0.111928	0.0215001	-2.08587	0.487176	down	no	-4.44938	0.0111139	down	yes	MFS transporter, putative
AFLA_001890	18.5634	16.414	5.86866	-0.172145	0.899877	down	no	-1.65683	2.43e-09	down	yes	cellobiose dehydrogenase
AFLA_001950	12.6903	5.63186	3.09165	-1.23535	0.187653	down	no	-2.1201	3.82e-06	down	yes	gluconate 5-dehydrogenase, putative
AFLA_002000	18.7874	32.1235	46.5808	0.706926	0.556044	up	no	1.2388	0.0292812	up	yes	DUF821 domain protein
AFLA_002030	1.8088	1.22721	0.412995	-0.678068	0.770107	down	no	-2.22101	0.00301593	down	yes	MFS monocarboxylate transporter, putative
AFLA_002200	60.3767	26.0818	6.48929	-1.20415	0.068803	down	no	-3.24116	7.1e-06	down	yes	esterase, putative
AFLA_002210	10.6476	4.34263	2.91878	-1.2889	0.223995	down	no	-1.88754	0.0114642	down	yes	hypothetical protein
AFLA_002300	49.9127	21.5786	13.108	-1.24209	0.435427	down	no	-1.91031	9.25e-17	down	yes	conserved hypothetical protein
AFLA_002440	90.3905	33.7175	26.2427	-1.5	0.140425	down	no	-1.83559	1.73e-09	down	yes	hypothetical protein
AFLA_002500	65.1777	52.232	17.6486	-0.291117	0.880167	down	no	-1.89786	2.31e-13	down	yes	succinate:fumarate antiporter (Acr1), putative
AFLA_002510	64.491	100.013	139.507	0.612979	0.413927	up	no	1.06458	0.000159337	up	yes	actin monomer binding protein, putative
AFLA_002690	16.6049	23.3938	37.1863	0.53245	0.661108	up	no	1.17789	0.00143896	up	yes	lectin family integral membrane protein, putative
AFLA_002850	91.8882	70.1219	40.9956	-0.520934	0.810659	down	no	-1.27042	0.0388793	down	yes	calcium binding protein Caleosin, putative
AFLA_002910	30.7497	63.8975	80.3706	1.02656	0.190841	up	no	1.31503	0.00013399	up	yes	conserved hypothetical protein
AFLA_003100	1.11117	3.22003	6.31892	1.44116	0.300125	up	no	2.38855	0.00419737	up	yes	C2H2 finger domain protein, putative
AFLA_003290	2.10639	5.93945	11.1415	1.49576	0.127535	up	no	2.36519	0.000474561	up	yes	hypothetical protein
AFLA_003440	160.437	78.8111	69.1278	-1.06535	0.279431	down	no	-1.23166	9.44e-09	down	yes	translation initiation factor 4B
AFLA_003540	115.993	61.5533	44.9658	-0.929938	0.1657	down	no	-1.3809	1.2e-09	down	yes	DnaJ domain protein (Mas5), putative
AFLA_003780	4.16074	3.59117	1.96347	-0.263493	0.948955	down	no	-1.15268	0.0481079	down	yes	choline/ethanolamine kinase, putative
AFLA_003950	30.3861	35.0104	74.8669	0.170631	0.881756	up	no	1.22989	9.86e-05	up	yes	GNAT family acetyltransferase, putative
AFLA_003960	16.6199	22.9722	177.846	0.419081	0.740028	up	no	3.33007	5.23e-09	up	yes	hypothetical protein
AFLA_004090	198.253	283.41	685.667	0.511935	0.535864	up	no	1.75594	6.21e-10	up	yes	conserved hypothetical protein
AFLA_004140	2.67205	1.59534	16.0428	-0.937455	0.863968	down	no	2.43729	0.00608834	up	yes	hypothetical protein
AFLA_004150	0.608931	0.904323	7.38611	0.535525	0.869167	up	no	3.53708	2.13e-06	up	yes	conserved hypothetical protein
AFLA_004160	0.782937	2.44986	3.12276	1.70252	0.107942	up	no	2.02663	0.000536448	up	yes	ankyrin repeat-containing protein, putative
AFLA_004170	2.81527	1.57779	1.10471	-0.896915	0.548074	down	no	-1.41953	0.0453398	down	yes	cyanamide hydratase, putative
AFLA_004250	6.22764	2.95413	2.69582	-1.12538	0.313938	down	no	-1.29749	0.0213973	down	yes	zinc binding dehydrogenase, putative
AFLA_004260	3.07506	0.693079	0.362079	-2.1661	0.104013	down	no	-3.07761	0.00131633	down	yes	MFS transporter, putative
AFLA_004420	4.1046	3.21116	1.69705	-0.299361	0.914202	down	no	-1.24032	0.0438256	down	yes	phospholipase D precursor, putative
AFLA_004510	530.004	191.263	120.13	-1.54296	0.0963833	down	no	-2.238	4.78e-16	down	yes	peroxidase, putative
AFLA_004530	33.2694	30.0155	9.23906	-0.184927	0.953993	down	no	-1.87313	5.71e-09	down	yes	conserved hypothetical protein
AFLA_004570	6.70818	6.79761	2.74956	-0.044525	1	down	no	-1.31766	0.00312825	down	yes	conserved hypothetical protein
AFLA_004650	467.887	915.84	1452.63	0.929643	0.25292	up	no	1.57235	5.18e-08	up	yes	thiamine biosynthesis protein (Nmt1), putative
AFLA_004710	37.5418	21.7761	17.3262	-0.774062	0.397066	down	no	-1.09231	4.47e-05	down	yes	DNA replication licensing factor Mcm5, putative
AFLA_004730	22.5551	44.9712	68.339	0.988052	0.121922	up	no	1.5624	5.96e-07	up	yes	ribokinase
AFLA_004910	66.1671	30.6009	32.1169	-1.3684	0.708346	down	no	-1.25542	4.43e-07	down	yes	MFS multidrug transporter, putative
AFLA_005210	0.844771	2.77799	2.96612	1.76058	0.0647063	up	no	1.81099	0.00561893	up	yes	hypothetical protein
AFLA_005540	5.8479	7.6633	47.9379	0.370281	0.81485	up	no	3.01602	1.11e-17	up	yes	sugar transporter, putative
AFLA_005550	6.1539	9.26507	58.3859	0.541929	0.673962	up	no	3.20869	4.92e-17	up	yes	conserved hypothetical protein
AFLA_005560	2.86259	7.21563	22.9634	1.29051	0.101204	up	no	2.97643	2.1e-13	up	yes	integral membrane protein, putative
AFLA_005590	48.6915	20.4168	18.6492	-1.29041	0.317386	down	no	-1.37653	6.52e-06	down	yes	conserved hypothetical protein
AFLA_005610	121.926	65.2046	59.2773	-0.882137	0.216435	down	no	-1.03363	1.56e-05	down	yes	NAP family protein
AFLA_005660	2.9186	4.0619	7.12021	0.459621	0.73637	up	no	1.25407	0.00875965	up	yes	conserved hypothetical protein
AFLA_005730	1092.41	466.998	350.768	-1.2359	0.0786663	down	no	-1.63543	1.98e-15	down	yes	60S ribosomal protein L4, putative
AFLA_005760	21.4127	14.535	7.94633	-0.619538	0.618942	down	no	-1.46241	0.00958733	down	yes	conserved hypothetical protein
AFLA_005820	45.3474	16.5389	13.9803	-1.48244	0.381238	down	no	-1.67105	9.9e-13	down	yes	small nucleolar ribonucleoprotein complex subunit (Pwp2), putative
AFLA_005950	141.069	107.999	71.5423	-0.469234	0.755369	down	no	-1.07935	6.39e-05	down	yes	stress response RCI peptide, putative
AFLA_006080	6.43895	13.1501	1.48108	0.940865	0.461092	up	no	-2.18571	0.0114677	down	yes	hypothetical protein
AFLA_006100	131.119	71.8225	47.0074	-0.951756	0.305304	down	no	-1.58302	2.13e-12	down	yes	HypA-like protein, putative
AFLA_006150	11.9736	14.7909	28.5919	0.26808	0.841817	up	no	1.2021	0.000518415	up	yes	flavin dependent monooxygenase, putative
AFLA_006170	2.37584	1.05356	1.10677	-1.17274	0.107942	down	no	-1.10368	0.00585479	down	yes	polyketide synthetase PksP
AFLA_006300	1153.59	1680.51	2741.26	0.567205	0.597371	up	no	1.24022	1.39e-05	up	yes	nucleoside diphosphate kinase
AFLA_006330	33.787	45.3011	75.0919	0.400736	0.699274	up	no	1.11197	0.000172057	up	yes	conserved hypothetical protein
AFLA_006590	33.4435	60.5268	105.18	0.837375	0.248936	up	no	1.61996	5.79e-09	up	yes	class III chitinase ChiA1
AFLA_006760	5.80542	5.5841	2.13147	-0.027028	1	down	no	-1.444	0.00123832	down	yes	integral membrane protein, putative
AFLA_006790	47.3118	21.5564	20.777	-1.15848	0.179928	down	no	-1.18563	5.43e-06	down	yes	tRNA-splicing endonuclease subunit Sen2, putative
AFLA_006990	60.4915	25.4953	25.4554	-1.26238	0.102019	down	no	-1.24392	9.9e-08	down	yes	DNA directed RNA polymerase III subunit Rpc82, putative
AFLA_007360	0.660155	2.15119	2.77248	1.59785	0.227313	up	no	1.98484	0.0133179	up	yes	hypothetical protein
AFLA_007530	147.568	53.3965	43.3046	-1.52917	0.2618	down	no	-1.87561	0.0386033	down	yes	conserved hypothetical protein
AFLA_007580	2.16549	1.55831	0.860069	-0.60698	0.728796	down	no	-1.44296	0.0245891	down	yes	MFS sugar transporter, putative
AFLA_007670	5.10842	6.47095	1.03116	0.169655	0.946855	up	no	-2.41414	2.7e-06	down	yes	sugar transporter, putative
AFLA_007680	6.15166	6.78071	1.17248	-0.0334978	1	down	no	-2.50021	8.97e-07	down	yes	argininosuccinate lyase, putative
AFLA_007690	7.11102	1.98872	21.8463	-1.85212	0.114995	down	no	1.55509	0.0322663	up	yes	conserved hypothetical protein
AFLA_007720	1.53663	3.4348	4.04916	1.18543	0.266144	up	no	1.36821	0.0192476	up	yes	pectin lyase
AFLA_007730	0.916109	0.626508	0.243323	-0.60109	0.842205	down	no	-1.99912	0.0261592	down	yes	conserved hypothetical protein
AFLA_007810	34.8567	21.0082	3.55874	-0.827553	0.447448	down	no	-3.40176	1.82e-24	down	yes	gibberellin 20-oxidase family protein
AFLA_007820	10.947	8.15477	2.76844	-0.487326	0.778188	down	no	-2.04908	0.00106985	down	yes	hypothetical protein
AFLA_007830	13.5773	12.0306	3.31338	-0.262862	0.915275	down	no	-2.12003	7.34e-06	down	yes	conserved hypothetical protein
AFLA_007840	25.2087	13.8892	5.12941	-0.917111	0.238392	down	no	-2.36707	2.21e-06	down	yes	cysteine desulfurylase, putative
AFLA_007850	10.1459	5.72389	2.99512	-0.882282	0.302938	down	no	-1.82153	0.000447437	down	yes	conserved hypothetical protein
AFLA_007860	91.4283	44.9628	17.2354	-1.06679	0.0990346	down	no	-2.44782	1.52e-10	down	yes	oligopeptide transporter, putative
AFLA_007870	7.84936	4.24988	1.99093	-0.953122	0.316574	down	no	-2.04601	3.73e-06	down	yes	phosphatidylserine decarboxylase, putative
AFLA_008080	56.1645	88.3798	172.742	0.658546	0.418857	up	no	1.59737	1.3e-06	up	yes	hypothetical protein
AFLA_008220	2.09027	2.39472	0.816964	0.0979752	0.991398	up	no	-1.42208	0.0204372	down	yes	conserved hypothetical protein
AFLA_008270	89.5472	36.5962	36.028	-1.29549	0.0617706	down	no	-1.30362	7.15e-08	down	yes	U3 small nucleolar ribonucleoprotein protein LCP5, putative
AFLA_008300	199	395.67	439.37	0.980016	0.12745	up	no	1.10286	6.13e-05	up	yes	ubiquitin conjugating enzyme (UbcB), putative
AFLA_008520	5.88315	5.29275	2.77766	-0.283109	1	down	no	-1.16611	0.0279977	down	yes	alpha-amylase, putative
AFLA_008600	19.9724	8.21213	53.4267	-1.36386	0.116024	down	no	1.33025	0.000689526	up	yes	conserved hypothetical protein
AFLA_008750	7.35132	7.06284	29.2946	-0.064945	1	down	no	1.95943	0.00423681	up	yes	hypothetical protein
AFLA_008890	355.268	833.19	1301.75	1.17489	0.160769	up	no	1.79269	1.08e-08	up	yes	glutamate decarboxylase
AFLA_008900	4.75875	10.8425	12.0717	1.13186	0.259267	up	no	1.26494	0.0223502	up	yes	conserved hypothetical protein
AFLA_008930	1.28873	1.65588	4.33991	0.364047	0.874658	up	no	1.74231	0.00122128	up	yes	acid phosphatase AphA
AFLA_008960	54.8795	13.6987	21.8496	-2.14984	0.165753	down	no	-1.45091	0.0264671	down	yes	TPR domain protein
AFLA_009060	3.04575	2.35116	0.77224	-0.400468	0.920955	down	no	-1.9483	0.00338259	down	yes	endo-1,4-beta-xylanase, putative
AFLA_009070	6.06301	3.55017	2.65872	-0.874335	0.56865	down	no	-1.26207	0.00756132	down	yes	conserved hypothetical protein
AFLA_009200	6.43722	4.08723	1.74124	-0.649249	0.585049	down	no	-1.91586	3.41e-05	down	yes	conserved hypothetical protein
AFLA_009210	92.3213	87.3084	34.1617	-0.0480849	1	down	no	-1.44275	1.22e-05	down	yes	hypothetical protein
AFLA_009230	1.47284	0.790742	0	-1.05922	0.953501	down	no	#NAME?	0.0370213	down	yes	hypothetical protein
AFLA_009270	44.5134	61.7107	101.468	0.442409	0.669775	up	no	1.1185	0.000286136	up	yes	conserved hypothetical protein
AFLA_009320	0.468897	0.118658	1.81254	-1.95598	0.52004	down	no	1.91549	0.00541671	up	yes	conserved hypothetical protein
AFLA_009400	1.42791	0.306294	0.256951	-2.1953	0.0990346	down	no	-2.44238	0.00492122	down	yes	conserved hypothetical protein
AFLA_009410	5.34128	2.26356	2.43528	-1.24717	0.2017	down	no	-1.14473	0.0417384	down	yes	delta(3,5)-delta(2,4)-dienoyl-CoA isomerase, mitochondrial precursor, putative
AFLA_009420	2.12232	5.09993	12.7966	1.25426	0.269746	up	no	2.54506	2.59e-07	up	yes	conserved hypothetical protein
AFLA_009430	113.964	175.712	273.381	0.65195	0.462766	up	no	1.24944	2.19e-05	up	yes	hypothetical protein
AFLA_009540	0.0709179	0.383671	1.67512	2.45384	0.698926	up	no	4.6255	0.0187193	up	yes	conserved hypothetical protein
AFLA_009690	8.52241	4.03915	4.19975	-1.14591	0.254149	down	no	-1.10611	0.0224109	down	yes	conserved hypothetical protein
AFLA_009740	0.949452	0.57823	0.0817674	-0.766506	0.957661	down	no	-3.48805	0.0468683	down	yes	hypothetical protein
AFLA_009790	1.81299	0.791697	0.42934	-1.27641	0.393577	down	no	-2.12656	0.000972749	down	yes	conserved hypothetical protein
AFLA_010000	1.27816	0.559917	0.516777	-1.22629	0.159968	down	no	-1.34942	0.0443335	down	yes	polyketide synthase, putative
AFLA_010010	3.69142	2.61156	1.68593	-0.503266	0.68755	down	no	-1.1658	0.00200973	down	yes	nonribosomal peptide synthase, putative
AFLA_010080	12.7654	26.9845	36.6737	1.12561	0.24686	up	no	1.54726	0.000185511	up	yes	ankyrin repeat-containing protein, putative
AFLA_010170	2.30479	4.78912	12.7425	1.03198	0.296529	up	no	2.43785	3.35e-07	up	yes	tropinone reductase, putative
AFLA_010230	6.05968	1.18755	1.28563	-2.41688	0.0894231	down	no	-2.24663	3.3e-05	down	yes	conserved hypothetical protein
AFLA_010240	6.37558	2.14424	0.884269	-1.59538	0.194404	down	no	-2.83907	9.8e-07	down	yes	hypothetical protein
AFLA_010580	32.5638	5.74615	2.14444	-2.5996	0.0876997	down	no	-3.94173	2.4e-87	down	yes	nonribosomal peptide synthase, putative
AFLA_010740	49.229	60.5936	117.697	0.312445	0.835333	up	no	1.23742	0.0014094	up	yes	lysosomal protective protein precursor, putative
AFLA_010770	21.6323	27.3483	44.6171	0.347948	0.758413	up	no	1.02006	0.0026637	up	yes	porphobilinogen deaminase Hem3, putative
AFLA_010790	32.7649	38.1973	160.487	0.161029	0.942753	up	no	2.19919	0.000880008	up	yes	elongation factor 1 gamma, putative
AFLA_010860	17.3203	12.4313	8.01551	-0.464891	0.692664	down	no	-1.12462	0.00151604	down	yes	F-box and wd40 domain protein, putative
AFLA_010970	0.696289	0.492076	0.136448	-0.476236	0.857527	down	no	-2.31612	0.0260433	down	yes	MFS maltose permease, putative
AFLA_011040	13.3994	10.01	3.01609	-0.424547	0.808578	down	no	-2.18943	2.46e-05	down	yes	conserved hypothetical protein
AFLA_011050	13.138	7.99698	4.47186	-0.724145	0.703693	down	no	-1.60989	0.00683966	down	yes	hypothetical protein
AFLA_011130	35.7136	18.4133	14.0748	-0.994665	0.15542	down	no	-1.3751	1.23e-06	down	yes	conserved hypothetical protein
AFLA_011220	0.371152	1.32801	2.54287	1.86356	0.271518	up	no	2.79799	0.00207761	up	yes	glucose dehydrogenase, putative
AFLA_011460	52.1243	26.5464	23.8607	-0.984092	0.391216	down	no	-1.11554	1.41e-05	down	yes	GMC oxidoreductase, putative
AFLA_011470	39.3852	46.4025	13.2184	0.199718	0.930482	up	no	-1.60132	9.08e-09	down	yes	conserved hypothetical protein
AFLA_011530	1029.39	224.442	509.582	-2.31603	0.111151	down	no	-1.09498	0.0265947	down	yes	hypothetical protein
AFLA_011540	8.77252	12.3743	40.4626	0.30632	1	up	no	2.05222	1.73e-06	up	yes	conserved hypothetical protein
AFLA_011640	75.2619	35.618	35.0933	-1.0795	0.107922	down	no	-1.0896	6.74e-06	down	yes	RNA binding protein, putative
AFLA_011730	49.1192	16.8748	19.8748	-1.5391	0.0601591	down	no	-1.28314	9.99e-05	down	yes	DNA-directed RNA polymerase III subunit 22.9 kDa, putative
AFLA_011900	50.6452	25.3977	17.5649	-1.0208	0.474216	down	no	-1.51172	4.83e-11	down	yes	rRNA maturation protein (Nop14), putative
AFLA_012000	18.0588	10.2575	6.47629	-0.770355	0.515218	down	no	-1.4475	0.00276582	down	yes	hypothetical protein
AFLA_012010	20.559	11.5875	6.99751	-0.779876	0.435427	down	no	-1.51899	4.81e-05	down	yes	C6 transcription factor (Ctf1B), putative
AFLA_012070	155.571	123.392	75.5132	-0.43877	0.866644	down	no	-1.09821	0.0479861	down	yes	betaine aldehyde dehydrogenase (BadH), putative
AFLA_012100	29.8278	21.0775	14.1242	-0.508584	0.575223	down	no	-1.09133	0.000108167	down	yes	NDT80_PhoG domain protein PcaG
AFLA_012200	542.848	238.655	188.459	-1.20891	0.264903	down	no	-1.52615	1.47e-12	down	yes	Hsp70 chaperone (HscA), putative
AFLA_012230	248.022	323.512	566.299	0.330244	0.794049	up	no	1.11261	8.89e-05	up	yes	conserved hypothetical protein
AFLA_012910	0.602508	0.221291	0.106873	-1.50669	0.377189	down	no	-2.55574	0.0200032	down	yes	MFS sugar transporter, putative
AFLA_013010	0.538245	0.424955	0.0539826	-0.465416	0.935122	down	no	-3.44405	0.0214697	down	yes	conserved hypothetical protein
AFLA_013020	0.687155	0.364755	0.13764	-0.898709	0.610412	down	no	-2.28421	0.0157113	down	yes	efflux pump antibiotic resistance protein, putative
AFLA_013030	2.6849	1.20144	0.953314	-1.19296	0.368518	down	no	-1.54442	0.0292608	down	yes	conserved hypothetical protein
AFLA_013040	12.3244	6.22154	4.63605	-0.954462	0.438891	down	no	-1.41655	0.000571713	down	yes	conserved hypothetical protein
AFLA_013150	1.40791	1.82433	3.45763	0.399319	0.858474	up	no	1.30193	0.0316938	up	yes	conserved hypothetical protein
AFLA_013160	3.56422	7.73218	14.4349	1.07756	0.178013	up	no	1.95244	1.11e-05	up	yes	methyltransferase family protein
AFLA_013180	116.627	62.6417	14.6816	-1.0267	0.263474	down	no	-3.12976	5.57e-12	down	yes	williams-beuren syndrome chromosome region, putative
AFLA_013220	9.16696	4.37472	2.13106	-1.2034	0.261601	down	no	-2.25148	0.000170557	down	yes	beta-lactamase family protein
AFLA_013350	364.611	360.618	80.6129	-0.0601474	1	down	no	-2.2564	9.98e-11	down	yes	hypothetical protein
AFLA_013370	80.2573	75.2197	30.7806	-0.186028	0.977877	down	no	-1.45574	9.43e-10	down	yes	sugar transporter, putative
AFLA_013400	20.9137	10.2403	9.42614	-1.05362	0.137148	down	no	-1.16342	2.54e-05	down	yes	ankyrin repeat-containing protein, putative
AFLA_013410	29.8309	14.9683	11.759	-1.00142	0.248936	down	no	-1.38856	0.00402482	down	yes	conserved hypothetical protein
AFLA_013500	1.80456	1.66943	0.269757	-0.131294	1	down	no	-2.70249	0.021705	down	yes	conserved hypothetical protein
AFLA_013520	122.078	106.224	53.9946	-0.189987	0.948955	down	no	-1.18544	0.00472317	down	yes	cytochrome P450, putative
AFLA_013530	1.93032	2.38358	0.347559	0.365119	0.983528	up	no	-2.44571	0.0323801	down	yes	conserved hypothetical protein
AFLA_013550	10.3645	8.62936	1.48459	-0.355696	0.956385	down	no	-2.85534	3.49e-05	down	yes	hypothetical protein
AFLA_013560	13.8035	11.5361	6.08997	-0.321459	0.86938	down	no	-1.22157	0.00614083	down	yes	conserved hypothetical protein
AFLA_013610	4.71918	4.28312	12.536	-0.239315	0.936722	down	no	1.29058	0.00552784	up	yes	multidrug resistance protein, putative
AFLA_013620	3.35766	3.9882	10.3292	0.1066	1	up	no	1.4395	0.0461386	up	yes	carboxylesterase, type B, putative
AFLA_013630	3.80001	6.63211	32.6777	0.651255	0.829782	up	no	2.91133	0.0219487	up	yes	conserved hypothetical protein
AFLA_013640	699.519	1022.61	2712.87	0.378115	1	up	no	1.7222	0.00511486	up	yes	hypothetical protein
AFLA_013740	5.0596	3.45934	2.14413	-0.642929	0.64977	down	no	-1.32003	0.0220089	down	yes	Acid phosphatase precursor, putative
AFLA_013790	3.37675	2.01722	0.695466	-0.746417	0.846994	down	no	-2.22284	0.0177862	down	yes	conserved hypothetical protein
AFLA_013820	3.28588	2.07481	0.831444	-0.675509	0.585442	down	no	-1.99076	0.000397765	down	yes	MFS myo-inositol transporter, putative
AFLA_013880	9.56556	19.0903	24.2987	1.03054	0.370237	up	no	1.34391	0.00131203	up	yes	lipase 2 precursor, putative
AFLA_014000	9.91753	11.8373	35.8911	0.201992	0.916175	up	no	1.76596	8.6e-05	up	yes	glutathione-S-transferase theta, GST, putative
AFLA_014010	1.94976	1.40339	9.99718	-0.438234	0.858434	down	no	2.35508	2.16e-06	up	yes	integral membrane protein
AFLA_014020	6.26784	4.67315	20.4592	-0.461943	0.913878	down	no	1.63012	0.000617361	up	yes	conserved hypothetical protein
AFLA_014030	28.8105	9.11065	1.86939	-1.8091	0.270286	down	no	-4.08569	4.94e-05	down	yes	hypothetical protein
AFLA_014050	39.2533	51.751	83.0314	0.389473	0.693884	up	no	1.04237	0.000754826	up	yes	pyrroline-5-carboxylate reductase
AFLA_014140	4.78831	5.62479	12.5646	0.172322	0.957114	up	no	1.33185	0.00236387	up	yes	aldehyde dehydrogenase family protein, putative
AFLA_014300	3.11556	0.565688	0.658822	-2.46956	0.0980691	down	no	-2.23628	0.0301227	down	yes	sodium bile acid symporter family protein
AFLA_014370	133.855	210.844	384.665	0.582332	0.641877	up	no	1.42335	1.6e-06	up	yes	homogentisate 1,2-dioxygenase, putative
AFLA_014510	3.73514	1.12444	18.5102	-1.71715	0.0902327	down	no	2.25668	8.89e-05	up	yes	formate/nitrite transporter family protein, putative
AFLA_014520	0.872196	2.62979	6.23994	1.58882	0.0770124	up	no	2.79976	1.61e-06	up	yes	multicopper oxidase, putative
AFLA_014570	3172.78	4910.21	7021.64	0.539141	0.756377	up	no	1.05372	0.00159833	up	yes	conserved hypothetical protein
AFLA_014730	33.2995	27.1061	14.7919	-0.270807	0.845761	down	no	-1.16905	0.000120729	down	yes	urease accessory protein UreD
AFLA_014760	43.9569	19.7321	12.4418	-1.19014	0.514836	down	no	-1.79988	3.05e-17	down	yes	rRNA biogenesis protein RRP5, putative
AFLA_015260	2.58529	1.4908	0.994979	-0.870549	0.670266	down	no	-1.41672	0.0379635	down	yes	short chain dehydrogenase/oxidoreductase, putative
AFLA_015280	8.37544	5.92057	2.3182	-0.516693	0.714705	down	no	-1.85491	0.000869098	down	yes	hypothetical protein
AFLA_015300	3.28226	3.05348	7.50849	-0.161939	0.964651	down	no	1.15162	0.0061798	up	yes	L-lactate dehydrogenase, putative
AFLA_015350	20.7048	27.5222	57.2301	0.396629	0.73637	up	no	1.4447	3.14e-06	up	yes	aldehyde dehydrogenase family protein, putative
AFLA_015360	6.59139	9.83567	17.5564	0.52287	0.585708	up	no	1.3537	5.06e-05	up	yes	N-methyltransferase, putative
AFLA_015520	2.98593	4.63785	9.89131	0.615158	0.716439	up	no	1.69005	0.00504931	up	yes	hypothetical protein
AFLA_015610	8.84825	15.187	20.9814	0.729099	0.394164	up	no	1.1892	0.00225025	up	yes	conserved hypothetical protein
AFLA_015620	1.88549	4.02674	8.43277	1.03387	0.349915	up	no	2.10919	0.000106315	up	yes	conserved hypothetical protein
AFLA_015660	0.19699	0.485537	1.2632	1.25311	0.557005	up	no	2.58562	0.00878836	up	yes	choline transport protein, putative
AFLA_015680	33.924	38.8463	16.0719	0.208867	0.893668	up	no	-1.11203	3.5e-05	down	yes	conserved hypothetical protein
AFLA_015710	22.6217	22.2892	11.6144	-0.0221533	1	down	no	-1.00075	0.00275311	down	yes	conserved hypothetical protein
AFLA_015760	2.14907	3.02259	8.12599	0.467702	0.772244	up	no	1.87735	0.000976833	up	yes	oligomycin resistance ATP-dependent permease yor1, putative
AFLA_015770	2.20741	2.15925	5.62124	-0.040431	1	down	no	1.30547	0.0293147	up	yes	ABC transporter, putative
AFLA_015880	3.22877	2.04213	1.47642	-0.633025	0.664141	down	no	-1.12393	0.0422186	down	yes	ATP-binding cassette transporter, putative
AFLA_016050	0.830348	2.51437	2.63996	1.58378	0.0995177	up	no	1.63962	0.0124026	up	yes	polysaccharide export protein (CAP59), putative
AFLA_016120	19.445	37.0003	87.5396	0.869006	0.411511	up	no	2.08001	5.09e-06	up	yes	O-methyltransferase family protein
AFLA_016130	22.5009	43.1496	119.459	0.896043	0.224124	up	no	2.3421	1.6e-10	up	yes	hypothetical protein
AFLA_016140	121.139	104.97	287.495	-0.238293	0.987341	down	no	1.17252	6.94e-05	up	yes	conidial pigment biosynthesis scytalone dehydratase Arp1
AFLA_016160	60.9897	23.4567	19.5894	-1.47515	0.102755	down	no	-1.72306	5.3e-12	down	yes	conserved hypothetical protein
AFLA_016320	3.68301	1.52154	0.988294	-1.33059	0.202211	down	no	-1.97361	0.000779103	down	yes	ToxD-like zinc binding oxidoreductase, putative
AFLA_016350	12.6677	2.10683	1.32189	-2.79232	0.315625	down	no	-3.42049	0.0462396	down	yes	NAD(P)H-dependent FMN reductase LOT6, putative
AFLA_016400	158.104	186.088	371.424	0.156961	0.970082	up	no	1.14796	0.00011963	up	yes	glutathione S-transferase, putative
AFLA_016440	0.0554165	0.318353	0.838075	2.27607	0.669049	up	no	3.68556	0.0480826	up	yes	conserved hypothetical protein
AFLA_016520	2.16009	0.593054	0.0709937	-1.9817	0.276695	down	no	-5.02157	0.000315758	down	yes	thioesterase family protein
AFLA_016570	38.9287	19.9465	18.3351	-1.06957	0.28479	down	no	-1.21816	0.0378921	down	yes	epoxide hydrolase, putative
AFLA_016580	44.5275	18.5655	6.34956	-1.24542	0.178013	down	no	-2.79831	5.84e-05	down	yes	conserved hypothetical protein
AFLA_016590	89.5576	31.9968	16.2451	-1.4543	0.211773	down	no	-2.42616	0.001746	down	yes	hypothetical protein
AFLA_016600	108.677	45.9815	22.182	-1.21444	0.165753	down	no	-2.26493	0.000359266	down	yes	conserved hypothetical protein
AFLA_016730	22.4257	24.179	46.4496	0.0739583	1	up	no	1.00643	0.00172402	up	yes	alanine racemase
AFLA_016750	11.5325	5.89849	4.89927	-0.973066	0.515218	down	no	-1.2069	0.000672024	down	yes	exonuclease, putative
AFLA_016790	1.43428	1.3427	0.67063	-0.201404	0.953501	down	no	-1.19873	0.0384368	down	yes	hypothetical protein
AFLA_016860	2.06248	2.0172	0.916932	-0.103189	1	down	no	-1.22458	0.0372724	down	yes	GMC oxidoreductase, putative
AFLA_016970	4.58331	8.79039	2.24913	0.905741	0.382786	up	no	-1.01954	0.0197696	down	yes	Rad21/Rec8 N terminal domain protein
AFLA_016990	615.609	299.12	261.198	-1.05186	0.123161	down	no	-1.24163	3.18e-09	down	yes	fibrillarin
AFLA_017030	4.2003	1.60162	1.86838	-1.35567	0.1784	down	no	-1.16719	0.0448379	down	yes	conserved hypothetical protein
AFLA_017100	7.34033	6.85049	3.17276	-0.165248	0.991398	down	no	-1.29704	0.000536448	down	yes	beta-galactosidase, putative
AFLA_017160	5.3004	2.12012	2.07676	-1.39306	0.0845134	down	no	-1.41118	0.00269758	down	yes	integral membrane protein Pth11-like, putative
AFLA_017300	22.4557	10.7068	6.58131	-1.08901	0.128783	down	no	-1.81229	1.56e-05	down	yes	cytochrome P450 oxidoreductase OrdA-like, putative
AFLA_017340	5.56341	8.94208	12.4898	0.682039	0.456362	up	no	1.1435	0.0216024	up	yes	MFS transporter, putative
AFLA_017350	2.96677	4.89011	6.55206	0.705355	0.45013	up	no	1.10776	0.011744	up	yes	conserved hypothetical protein
AFLA_017410	450.144	522.812	209.093	0.158215	0.934113	up	no	-1.16249	0.032403	down	yes	blue light-inducible protein Bli-3
AFLA_017530	53.7121	29.1929	20.3114	-0.908974	0.500134	down	no	-1.39192	8.82e-11	down	yes	DNA-directed RNA polymerase I subunit (Rpa190), putative
AFLA_017600	136.035	257.074	300.264	0.847214	0.380015	up	no	1.08479	5.23e-05	up	yes	MFS multidrug transporter, putative
AFLA_017830	538.885	234.87	210.14	-1.2116	0.0666932	down	no	-1.35856	7.85e-11	down	yes	small nuclear ribonucleoprotein complex protein Nhp2, putative
AFLA_017840	1.78276	1.80788	0.475259	-0.0352749	1	down	no	-1.89055	0.000571587	down	yes	NRPS-like enzyme, putative
AFLA_017900	75.8568	47.042	34.6012	-0.719112	0.398625	down	no	-1.18938	0.00336894	down	yes	C6 transcription factor FacB/Cat8
AFLA_017910	126.962	197.312	278.872	0.583128	0.662294	up	no	1.11074	4.94e-05	up	yes	transketolase TktA
AFLA_018140	56.6806	63.4307	148.772	0.16025	0.938079	up	no	1.37287	8.28e-07	up	yes	mannose-6-phosphate isomerase, class I
AFLA_018250	18.5052	11.1812	9.03524	-0.765527	0.474301	down	no	-1.04483	4.9e-05	down	yes	conserved hypothetical protein
AFLA_018430	3.49572	2.09222	0.591399	-0.827598	0.756185	down	no	-2.59803	0.000150468	down	yes	hypothetical protein
AFLA_018470	5.04966	26.5121	21.6906	2.44421	0.0585279	up	no	2.11496	0.00193694	up	yes	conserved hypothetical protein
AFLA_018480	34.8497	73.6709	76.3728	1.07338	0.079619	up	no	1.09235	0.000219548	up	yes	cytoskeletal adaptor protein SagA
AFLA_018550	76.3826	101.809	161.432	0.399774	0.731325	up	no	1.05368	0.000107505	up	yes	glycogen phosphorylase GlpV/Gph1, putative
AFLA_018560	34.8745	26.3681	13.2373	-0.359958	0.84563	down	no	-1.38699	9.07e-08	down	yes	ABC fatty acid transporter, putative
AFLA_018660	7.81057	3.94318	3.43152	-0.968348	0.349161	down	no	-1.19803	0.0213689	down	yes	conserved hypothetical protein
AFLA_018710	7.47739	4.40236	3.15883	-0.762736	0.582581	down	no	-1.27199	0.0154712	down	yes	hypothetical protein
AFLA_018720	0.776154	0.532304	0.161828	-0.567877	0.822621	down	no	-2.30307	0.00222335	down	yes	ABC multidrug transporter, putative
AFLA_018730	30.3809	16.0461	10.6645	-0.922262	0.255874	down	no	-1.53648	4.77e-06	down	yes	epoxide hydrolase, putative
AFLA_018790	0.898711	0.409906	28.91	-1.1509	0.607903	down	no	4.92399	7.95e-20	up	yes	nitrate transporter CrnA
AFLA_018800	88.088	136.899	185.84	0.594411	0.583382	up	no	1.01125	0.000208901	up	yes	nitrite reductase NiiA
AFLA_018810	24.7235	42.5916	71.5081	0.779908	0.358185	up	no	1.49795	0.000848655	up	yes	nitrate reductase NiaD
AFLA_018870	234.707	138.629	115.351	-0.837031	0.366672	down	no	-1.11375	4.63e-06	down	yes	conserved hypothetical protein
AFLA_018940	7.05485	8.34734	15.8491	0.213166	0.905053	up	no	1.12183	0.0058551	up	yes	PfkB family carbohydrate kinase (Mak32), putative
AFLA_019030	55.7617	132.13	123.122	1.22533	0.0600457	up	no	1.08214	0.00247283	up	yes	hypothetical protein
AFLA_019090	21.4421	9.65369	8.4992	-1.17807	0.14142	down	no	-1.36935	0.00130094	down	yes	conserved hypothetical protein
AFLA_019120	15.4386	9.35151	4.0979	-0.748642	0.445634	down	no	-1.93007	8.8e-05	down	yes	conserved hypothetical protein
AFLA_019140	4.65484	2.69193	1.50339	-0.788291	0.461622	down	no	-1.6519	0.00411835	down	yes	conserved hypothetical protein
AFLA_019150	5.55335	2.95344	0.983287	-0.908841	0.53425	down	no	-2.51642	7.75e-06	down	yes	conserved hypothetical protein
AFLA_019230	9977.58	10254.7	5152.15	-0.0358867	1	down	no	-1.05058	0.035609	down	yes	mismatched base pair and cruciform DNA recognition protein, putative
AFLA_019280	150.157	282.34	334.949	0.893377	0.17903	up	no	1.10355	6.96e-05	up	yes	peroxiredoxin, putative
AFLA_019300	82.5625	21.0724	31.5762	-1.99197	0.0958253	down	no	-1.37036	5.68e-08	down	yes	conserved hypothetical protein
AFLA_019320	2.65768	2.35221	0.971532	-0.144094	1	down	no	-1.43396	0.0260534	down	yes	hypothetical protein
AFLA_019340	3.93638	0.732509	0.320149	-2.46912	0.0501604	down	no	-3.71352	9.54e-06	down	yes	conserved hypothetical protein
AFLA_019350	1.54589	0.462215	0.200959	-1.78264	0.0880005	down	no	-3.00648	0.00462821	down	yes	conserved hypothetical protein
AFLA_019430	56.4536	51.3149	111.144	-0.0958091	0.993212	down	no	1.00564	0.00481305	up	yes	monoxygenase, putative
AFLA_019510	7.5815	4.10024	2.55986	-0.971946	0.406448	down	no	-1.65581	0.00509262	down	yes	conserved hypothetical protein
AFLA_019520	23.6185	42.4886	54.6078	0.856963	0.222748	up	no	1.19145	7.56e-05	up	yes	conserved hypothetical protein
AFLA_019550	23.0471	4.68002	7.70737	-2.32252	0.489344	down	no	-1.52648	1.3e-06	down	yes	MFS multidrug transporter, putative
AFLA_019610	5.97297	10.5678	23.8006	0.794127	0.393799	up	no	1.90783	0.00110316	up	yes	carboxypeptidase S1, putative
AFLA_019660	17.7721	11.8099	8.69031	-0.617653	0.58839	down	no	-1.08392	0.00550366	down	yes	deoxyribonuclease tatD, putative
AFLA_019740	5.85511	2.37439	1.94789	-1.33992	0.53634	down	no	-1.5702	1.54e-05	down	yes	multidrug resistance protein 1, 2, putative
AFLA_019820	42.0401	24.2149	17.5095	-0.818135	0.524164	down	no	-1.25036	4.66e-07	down	yes	DNA replication licensing factor Mcm2, putative
AFLA_019930	3.46874	1.97789	0.457619	-0.822776	0.558822	down	no	-2.9712	1.84e-05	down	yes	short chain dehydrogenase/reductase, putative
AFLA_019940	6.03407	2.43064	0.698351	-1.28394	0.148497	down	no	-3.11627	9.3e-05	down	yes	sugar transporter, putative
AFLA_020070	14.4667	29.1352	30.4048	0.999251	0.506166	up	no	1.09274	0.00178798	up	yes	DUF1212 domain membrane protein Prm10, putative
AFLA_020280	162.682	358.054	548.872	1.12642	0.07151	up	no	1.71426	5.65e-10	up	yes	glycolipid transfer protein HET-C2, putative
AFLA_020360	14.8961	29.5319	65.554	0.982845	0.137398	up	no	2.11182	3.34e-12	up	yes	potassium ion channel Yvc1, putative
AFLA_020370	23.9096	32.303	52.9745	0.413884	0.707704	up	no	1.10844	0.00184748	up	yes	LRP16 family protein
AFLA_020420	21.238	30.3696	49.6019	0.503015	0.588915	up	no	1.18055	0.00223072	up	yes	conserved hypothetical protein
AFLA_020450	186.967	93.2545	71.2272	-1.01993	0.282734	down	no	-1.38489	3.16e-11	down	yes	nucleolar protein nop5
AFLA_020460	39.0507	67.7269	81.413	0.794622	0.267614	up	no	1.02763	0.000622264	up	yes	vacuolar ATP synthase subunit d, putative
AFLA_020510	998.462	332.397	468.176	-1.60188	0.0995177	down	no	-1.07704	5.07e-07	down	yes	40S ribosomal protein S0
AFLA_020550	36.4368	16.3373	15.2128	-1.17847	0.51239	down	no	-1.23162	7.34e-06	down	yes	DEAD/DEAH box helicase (Sbp4), putative
AFLA_020870	24.5681	15.7672	12.1511	-0.651792	0.405142	down	no	-1.02747	0.000168637	down	yes	kinesin family protein
AFLA_021090	5.68786	3.93343	1.57251	-0.480747	0.789134	down	no	-1.83853	0.000200905	down	yes	sporulation associated protein
AFLA_021100	7.80875	2.18676	0.797295	-1.80123	0.146398	down	no	-3.272	2.17e-22	down	yes	prostaglandin G/H synthase 2/cyclooxygenase 2, pgh2/cox2, putative
AFLA_021130	66.8076	29.2173	24.5774	-1.23048	0.242485	down	no	-1.44026	2.08e-10	down	yes	lupus la ribonucleoprotein, putative
AFLA_021150	53.8859	128.561	149.699	1.25653	0.0633532	up	no	1.43291	3.43e-05	up	yes	cytochrome c oxidase assembly protein Cox19, putative
AFLA_021290	29.4816	18.4563	9.28398	-0.695734	0.431427	down	no	-1.69604	5.64e-05	down	yes	conserved hypothetical protein
AFLA_021350	13.2067	7.26018	4.62518	-0.830951	0.395203	down	no	-1.51304	6.94e-05	down	yes	transulfuration enzyme family protein, putative
AFLA_021370	6.75244	8.316	14.5382	0.29811	0.847737	up	no	1.07358	0.0212781	up	yes	O-acetyltransferase, putative
AFLA_021730	3101.4	1282.72	1460.22	-1.26784	0.0809749	down	no	-1.08501	8.35e-07	down	yes	ribosomal protein S23 (S12)
AFLA_021850	10.1799	14.4178	22.3589	0.488419	0.628339	up	no	1.0959	0.00485119	up	yes	maleylacetate reductase, putative
AFLA_021910	17.7062	12.8463	8.06869	-0.49545	0.637242	down	no	-1.18226	9.96e-06	down	yes	NACHT and Ankyrin domain protein
AFLA_021920	27.4087	21.1813	12.5188	-0.416408	0.739296	down	no	-1.16291	0.00478133	down	yes	cellular morphogenesis protein Boi1-like, putative
AFLA_022810	0.759822	0.705958	0.137018	-0.109382	1	down	no	-2.52021	0.0100907	down	yes	sugar transporter, putative
AFLA_022820	9.47255	1.2005	0.553126	-2.90961	0.134758	down	no	-4.02433	0.0110639	down	yes	conserved hypothetical protein
AFLA_022830	36.4522	4.6543	3.22641	-2.90445	0.0995177	down	no	-3.41815	0.0116394	down	yes	conserved hypothetical protein
AFLA_023010	5.22449	0.689227	0.7937	-2.98788	0.248936	down	no	-2.82055	0.000307715	down	yes	GA4 desaturase family protein
AFLA_023020	0.30329	0.0262272	0.0236354	-3.54334	0.0703404	down	no	-3.68929	0.00657783	down	yes	NRPS-like enzyme, putative
AFLA_023030	0.802305	0.186806	0.206095	-2.14206	0.211998	down	no	-2.04572	0.047165	down	yes	cytochrome P450 oxidoreductase GliC-like, putative
AFLA_023040	7.13124	3.89282	2.05864	-0.876423	0.269791	down	no	-1.77924	3.42e-06	down	yes	C6 transcription factor, putative
AFLA_023100	2.59967	0.890908	0.618526	-1.51693	0.196019	down	no	-2.06012	0.0050111	down	yes	hypothetical protein
AFLA_023140	1.17915	2.94419	18.6155	1.35346	0.469657	up	no	4.00512	5.87e-07	up	yes	conserved hypothetical protein
AFLA_023150	1.52858	4.6154	25.1274	1.54605	0.177347	up	no	3.96976	1.51e-10	up	yes	hypothetical protein
AFLA_023240	2.09629	1.02364	0	-0.965533	0.780598	down	no	#NAME?	0.0126611	down	yes	hypothetical protein
AFLA_023380	32.5648	14.6041	13.2369	-1.17611	0.0666932	down	no	-1.31382	1.63e-06	down	yes	hexokinase family protein
AFLA_023390	26.0527	33.5385	6.61602	0.309037	0.863822	up	no	-2.02562	0.027765	down	yes	cutinase precursor, putative
AFLA_023400	4.00177	2.75485	1.62854	-0.547751	0.664629	down	no	-1.31415	0.0120105	down	yes	pantothenate transporter, putative
AFLA_023410	1.22612	0.601527	0.0613439	-1.0544	0.484704	down	no	-4.36902	0.0264768	down	yes	hypothetical protein
AFLA_023430	32.2845	10.1777	6.58587	-1.62431	0.112802	down	no	-2.25036	0.0239129	down	yes	glycosyl transferase, putative
AFLA_023440	21.1745	9.42787	2.8818	-1.1051	0.259267	down	no	-2.83939	0.00101758	down	yes	acyltransferase, putative
AFLA_023540	1.40507	1.12235	0.622663	-0.326957	0.92753	down	no	-1.20051	0.026923	down	yes	ABC multidrug transporter, putative
AFLA_023680	1.70376	3.32945	7.23082	0.984172	0.429219	up	no	2.04355	0.000267381	up	yes	conserved hypothetical protein
AFLA_023740	11.9473	16.9619	29.7038	0.466696	0.676555	up	no	1.23553	0.00213269	up	yes	glutathione S-transferase, putative
AFLA_023830	27.6609	18.2046	12.8336	-0.673426	0.551741	down	no	-1.18824	0.00200973	down	yes	conserved hypothetical protein
AFLA_023850	22.8537	49.8309	223.178	1.17989	0.16985	up	no	3.2958	4.47e-22	up	yes	conserved hypothetical protein
AFLA_023860	0.592334	0.37658	1.93198	-0.613639	0.916959	down	no	1.68413	0.0273592	up	yes	DNA-binding protein rfxank, putative
AFLA_023900	0.78744	1.36	3.17402	0.769821	0.83493	up	no	1.99406	0.0331812	up	yes	hypothetical protein
AFLA_023970	1.06067	0.310551	0.413849	-1.77257	0.191048	down	no	-1.37978	0.0477983	down	yes	C6 transcription factor, putative
AFLA_024040	6.80478	3.15618	3.2699	-1.12448	0.151363	down	no	-1.06573	0.0169976	down	yes	fungal specific transcription factor, putative
AFLA_024060	6.28662	3.67635	3.1469	-0.830071	0.419916	down	no	-1.06555	0.0334533	down	yes	nonspecific lipid-transfer protein, putative
AFLA_024110	25.9265	10.0056	6.61554	-1.40398	0.272426	down	no	-1.95178	9.77e-05	down	yes	set and mynd domain containing protein, putative
AFLA_024130	12.1606	4.30503	1.98533	-1.59207	0.100805	down	no	-2.7011	9.71e-07	down	yes	conserved hypothetical protein
AFLA_024160	2.09604	3.96207	6.53985	0.914799	0.258719	up	no	1.61483	2.72e-05	up	yes	kinesin light chain, putative
AFLA_024180	3.33749	2.1276	1.11801	-0.626483	0.67122	down	no	-1.53512	0.0173773	down	yes	conserved hypothetical protein
AFLA_024210	5.12643	2.77369	1.81681	-0.895533	0.336451	down	no	-1.5074	0.00166376	down	yes	cytochrome P450, putative
AFLA_024540	3.88486	3.42574	1.80583	-0.224191	0.940641	down	no	-1.10974	0.0261592	down	yes	sensory transduction histidine kinase, putative
AFLA_024560	2.52167	1.66863	0.723401	-0.586658	0.702481	down	no	-1.79461	0.00439338	down	yes	efflux pump antibiotic resistance protein, putative
AFLA_024590	75.7237	66.5328	33.4287	-0.243014	0.914414	down	no	-1.25198	1.89e-07	down	yes	plasma membrane zinc ion transporter, putative
AFLA_024820	20.7958	9.74932	5.21007	-1.15379	0.334237	down	no	-2.03887	0.0342754	down	yes	hypothetical protein
AFLA_024870	76.4071	35.6819	23.9363	-1.13652	0.424102	down	no	-1.66038	5.35e-14	down	yes	nucleolar RNA methyltransferase (Nop2), putative
AFLA_024940	40.0012	13.4192	13.4591	-1.59727	0.413103	down	no	-1.53559	7.08e-09	down	yes	eukaryotic translation initiation factor 3, gamma subunit, putative
AFLA_025060	160.028	234.556	66.8573	0.496688	0.832805	up	no	-1.37402	0.0108099	down	yes	GPI anchored protein, putative
AFLA_025130	2445.42	7119.47	10412.1	1.54018	0.105303	up	no	2.04903	2.67e-08	up	yes	BYS1 domain protein, putative
AFLA_025220	35.5282	51.2444	85.4431	0.477609	0.674771	up	no	1.18922	0.00308398	up	yes	UPF0047 domain protein
AFLA_025280	2.79208	8.75669	7.24566	1.6908	0.0647063	up	no	1.37119	0.0415609	up	yes	hypothetical protein
AFLA_025380	48.3912	92.1524	110.197	0.886458	0.169368	up	no	1.12604	0.00296306	up	yes	conserved hypothetical protein
AFLA_025390	11.6982	27.4983	35.2337	1.2175	0.0603662	up	no	1.55738	1.15e-05	up	yes	high affinity zinc ion transporter, putative
AFLA_025450	0.639413	0.413013	0.0379198	-0.562451	0.90455	down	no	-4.0948	0.0187299	down	yes	oxidoreductase, short chain dehydrogenase/reductase family
AFLA_025510	5.50026	4.48701	2.6494	-0.321189	0.846994	down	no	-1.0556	0.00704914	down	yes	GPI anchored protein, putative
AFLA_025840	9.21666	4.83869	2.15304	-0.927489	0.630192	down	no	-2.06475	5.98e-06	down	yes	indoleamine 2,3-dioxygenase pyrrole 2,3-dioxygenase)
AFLA_025850	13.8777	12.0539	4.68238	-0.234666	0.962138	down	no	-1.54977	0.000241686	down	yes	kynureninase, putative
AFLA_025860	112.213	210.387	255.501	0.895142	0.253506	up	no	1.13955	2.66e-05	up	yes	C6 transcription factor, putative
AFLA_025930	23.482	11.733	9.38663	-1.09393	0.170024	down	no	-1.41871	0.0178813	down	yes	ABC transporter, putative
AFLA_025980	420.437	134.159	199.419	-1.78922	0.313938	down	no	-1.18579	1.14e-07	down	yes	Hsp90 co-chaperone Cdc37
AFLA_026040	11.6964	24.266	30.9791	1.07159	0.10755	up	no	1.40302	1.54e-05	up	yes	class I alpha-mannosidase
AFLA_026080	7.37817	3.86362	2.88796	-1.07782	0.698926	down	no	-1.45684	0.0131932	down	yes	hypothetical protein
AFLA_026090	497.152	220.163	186.766	-1.2976	0.413927	down	no	-1.50822	2.48e-10	down	yes	hypothetical protein
AFLA_026200	64.9782	33.9117	33.8033	-1.05242	0.225289	down	no	-1.04883	0.000397388	down	yes	NAD binding Rossmann fold oxidoreductase, putative
AFLA_026580	34.7719	53.7457	76.9177	0.588119	0.492768	up	no	1.09753	0.00106166	up	yes	mitochondrial chaperone Frataxin, putative
AFLA_026620	98.1976	38.9609	32.503	-1.36253	0.367122	down	no	-1.57497	1.93e-13	down	yes	small nucleolar ribonucleoprotein complex component (Utp5), putative
AFLA_026830	2364.15	972.664	1166.88	-1.27947	0.0857555	down	no	-1.01769	7.1e-06	down	yes	40S ribosomal protein S6
AFLA_026940	17.6604	10.6879	8.38752	-0.738847	0.42	down	no	-1.09157	0.00717873	down	yes	DlpA domain protein
AFLA_026950	308.833	230.414	144.086	-0.404572	0.731685	down	no	-1.08085	0.016751	down	yes	3-ketoacyl-coA thiolase peroxisomal A precursor
AFLA_027050	13.19	6.5014	6.03632	-1.00349	0.191048	down	no	-1.12237	0.00217545	down	yes	cystathionine gamma-synthase, putative
AFLA_027060	13.3631	2.75545	2.74184	-2.28545	0.0771763	down	no	-2.26071	0.0130781	down	yes	conserved hypothetical protein
AFLA_027190	4.38625	2.15501	1.81225	-1.01775	0.227313	down	no	-1.27022	0.00434163	down	yes	pheromone-regulated multispanning membrane protein Prm1, putative
AFLA_027350	59.7631	95.8007	143.831	0.655804	0.39577	up	no	1.22228	7.03e-06	up	yes	saccharopine dehydrogenase Lys9, putative
AFLA_027710	293.829	488.468	841.708	0.726328	0.395203	up	no	1.46406	5.55e-08	up	yes	cyclophilin, putative
AFLA_027810	30.0622	24.3947	200.818	-0.396472	0.801365	down	no	2.6166	0.00384883	up	yes	alkaline serine protease Alp1
AFLA_027850	16.8166	21.242	36.6917	0.303348	0.796641	up	no	1.06038	0.025273	up	yes	glyoxylate reductase
AFLA_027980	74.0471	184.273	164.827	1.30109	0.23079	up	no	1.0888	0.0012941	up	yes	NUDIX domain, putative
AFLA_028110	35.229	20.3721	15.0902	-0.837784	0.377189	down	no	-1.29421	1.13e-05	down	yes	D-lactate dehydrogenase (cytochrome), putative
AFLA_028130	81.6099	54.7698	42.8391	-0.671571	0.554058	down	no	-1.0387	0.000202012	down	yes	thermoresistant gluconokinase family protein
AFLA_028160	87.3851	120.444	184.099	0.465452	0.610427	up	no	1.04846	0.00018061	up	yes	ubiquitin conjugating enzyme (MmsB), putative
AFLA_028190	101.177	36.165	39.8757	-1.52531	0.126403	down	no	-1.33702	6.82e-09	down	yes	TPR domain protein
AFLA_028330	18.1405	7.98547	3.85417	-1.1904	0.281746	down	no	-2.25018	0.000716259	down	yes	hypothetical protein
AFLA_028340	407.218	1015.44	1476.85	1.3464	0.0739307	up	no	1.8545	2.07e-10	up	yes	GPI anchored serine-threonine rich protein
AFLA_028470	230.083	552.793	664.801	1.25474	0.0622689	up	no	1.48393	6.23e-08	up	yes	transmembrane protein 14, putative
AFLA_028660	62.662	33.6601	25.3676	-0.914302	0.429342	down	no	-1.29247	2.43e-09	down	yes	mitochondrial translation initiation factor IF-2, putative
AFLA_028710	22.6364	27.3794	124.947	0.220243	0.917085	up	no	2.37187	6.85e-10	up	yes	short chain type dehydrogenase, putative
AFLA_028780	4.99951	10.3721	11.8539	1.0797	0.1657	up	no	1.24058	0.00522739	up	yes	FAD dependent oxidoreductase, putative
AFLA_028850	1.93511	2.51328	5.05798	0.370985	0.864048	up	no	1.37132	0.0175608	up	yes	Pfs, NB-ARC and TPR domain protein
AFLA_028910	215.768	103.296	85.512	-1.08698	0.338319	down	no	-1.32574	2.44e-10	down	yes	polyadenylate-binding protein
AFLA_028940	47.9043	26.9411	19.8338	-0.85648	0.673834	down	no	-1.24943	1.45e-07	down	yes	small nucleolar ribonucleoprotein complex subunit Utp14, putative
AFLA_029020	2528.14	1145.69	1264.04	-1.14521	0.133946	down	no	-1.00556	8e-06	down	yes	40S ribosomal protein S8e
AFLA_029070	121.113	52.0586	43.0059	-1.2588	0.465687	down	no	-1.47306	1.73e-10	down	yes	ribosome assembly and transport protein Srp40, putative
AFLA_029180	41.9045	17.4438	20.2481	-1.24818	0.120328	down	no	-1.01806	0.000644642	down	yes	PP-loop ATPase superfamily protein, putative
AFLA_029310	50.6942	68.3715	144.097	0.36662	0.773552	up	no	1.43332	9.83e-07	up	yes	alcohol dehydrogenase, zinc-containing, putative
AFLA_029500	79.4741	59.649	36.2282	-0.485546	0.783944	down	no	-1.17087	5.41e-07	down	yes	lysyl-tRNA synthetase, putative
AFLA_029550	0.343411	0.717017	1.60168	1.08585	0.549837	up	no	2.21963	0.00693061	up	yes	conserved hypothetical protein
AFLA_029620	16.5659	7.83118	3.04037	-1.15651	0.361291	down	no	-2.46136	1.44e-10	down	yes	transcription factor AbaA
AFLA_029630	73.7235	33.0728	25.9192	-1.20238	0.271518	down	no	-1.51331	4.76e-12	down	yes	pre-rRNA processing protein Mrd1, putative
AFLA_029640	122.223	217.53	312.274	0.838002	0.255874	up	no	1.323	1.24e-05	up	yes	dynein light chain type 1, putative
AFLA_029660	3.32199	1.95375	12.5822	-0.765188	0.456362	down	no	1.88595	0.00100873	up	yes	urea transporter (Dur3), putative
AFLA_029670	67.9359	106.069	138.923	0.680584	0.416697	up	no	1.0392	0.000426796	up	yes	translocon protein Sec61beta, putative
AFLA_029810	8.80544	4.15442	4.28946	-1.09119	0.258719	down	no	-1.02299	0.00262025	down	yes	RNA polymerase III transcription factor TFIIIC subunit Tfc4
AFLA_029850	577.017	342.805	80.2058	-0.747537	0.656176	down	no	-2.89771	6.4e-06	down	yes	cysteine-rich secreted protein
AFLA_029900	2.16249	1.87104	4.8687	-0.207609	0.964775	down	no	1.15051	0.0291275	up	yes	F-box domain protein
AFLA_029910	8.14821	15.3046	26.2844	0.912715	0.22381	up	no	1.66428	3.14e-06	up	yes	disulfide isomerase, putative
AFLA_029920	62.4894	29.7843	16.9111	-1.10871	0.484688	down	no	-1.87125	4.58e-18	down	yes	nucleolar ATPase Kre33, putative
AFLA_030030	193.744	95.6341	72.0708	-1.04116	0.15733	down	no	-1.437	3.16e-12	down	yes	eukaryotic translation initiation factor 3 subunit EifCa, putative
AFLA_030080	25.8502	13.4778	11.2573	-0.961751	0.459382	down	no	-1.18824	0.000468798	down	yes	C2H2 transcription factor (TFIIIA), putative
AFLA_030110	23.9549	51.7961	74.1943	1.14193	0.0863947	up	no	1.62724	1.04e-07	up	yes	COPII-coated vesicle membrane protein Erv46, putative
AFLA_030150	37.6129	15.0248	14.9632	-1.34408	0.305429	down	no	-1.31078	1.57e-05	down	yes	tRNA methyltransferase, putative
AFLA_030280	30.1491	13.0877	12.661	-1.18622	0.111922	down	no	-1.22848	2.38e-05	down	yes	protein-tyrosine phosphatase, putative
AFLA_030370	13.7573	8.03904	4.34127	-0.79732	0.422276	down	no	-1.72733	0.0110919	down	yes	cinnamoyl-CoA reductase, putative
AFLA_030470	5.43447	8.68999	21.4431	0.586241	0.614077	up	no	1.90895	8.36e-07	up	yes	Methionine synthase, vitamin-B12 independent, putative
AFLA_030480	8.1954	12.6675	20.6198	0.573374	0.596575	up	no	1.26949	0.00232563	up	yes	F-box domain protein
AFLA_030570	20.1666	9.62567	7.1692	-1.24667	0.746727	down	no	-1.62215	0.00366698	down	yes	RAB-33, putative
AFLA_030610	22.6724	31.7642	51.0294	0.477492	0.62743	up	no	1.13802	0.00117222	up	yes	transcription regulator PAB1642, putative
AFLA_030710	154.283	276.62	543.398	0.805585	0.302387	up	no	1.76494	5.42e-10	up	yes	phosphoglucomutase PgmA
AFLA_030770	8.43505	9.58075	21.6674	0.17404	0.934224	up	no	1.33505	3.75e-05	up	yes	beta-N-acetylglucosaminidase, putative
AFLA_030830	95.186	189.188	200.763	0.941813	0.16656	up	no	1.01793	0.000235517	up	yes	oxysterol binding protein (Osh5), putative
AFLA_030910	2.38066	0.849159	0.740242	-1.53136	0.254135	down	no	-1.748	0.0218886	down	yes	oxidoreductase, short chain dehydrogenase/reductase family
AFLA_031040	7.59203	0.241586	0.589226	-4.85043	0.215276	down	no	-3.61751	3.41e-06	down	yes	conserved hypothetical protein
AFLA_031140	27.9921	8.96358	8.73689	-1.65283	0.126197	down	no	-1.72923	3.29e-14	down	yes	LipA and NB-ARC domain protein
AFLA_031520	50.0895	16.2321	15.0154	-1.65673	0.413927	down	no	-1.70604	1.69e-12	down	yes	rRNA processing protein Nop9, putative
AFLA_031650	1.27748	1.05239	0.334426	-0.298185	0.889315	down	no	-1.94948	0.00227114	down	yes	eukaryotic translation initiation factor eIF-2C4, putative
AFLA_031760	7.32289	12.3787	20.585	0.724436	0.345821	up	no	1.43628	8.96e-06	up	yes	glutaminase, putative
AFLA_031850	65.481	40.6115	26.9695	-0.718982	0.499021	down	no	-1.28981	1.15e-05	down	yes	eukaryotic translation initiation factor subunit, putative
AFLA_031860	5.65261	13.2103	13.5464	1.23279	0.088263	up	no	1.22842	0.00103488	up	yes	conserved hypothetical protein
AFLA_032030	56.9001	99.7832	162.313	0.766681	0.380015	up	no	1.48359	7.55e-08	up	yes	hydroxymethylglutaryl-CoA synthase Erg13, putative
AFLA_032370	434.002	1042.14	927.937	1.25372	0.0962938	up	no	1.04578	0.00373894	up	yes	Rho GTPase Rho 2, putative
AFLA_032580	20.5844	10.9339	10.3296	-0.929485	0.222748	down	no	-1.00233	0.00547401	down	yes	cell division control protein (Cdc15), putative
AFLA_032630	20.0358	29.4735	51.2196	0.567377	0.521147	up	no	1.34311	4.25e-06	up	yes	acid phosphatase, putative
AFLA_032730	24.5062	40.5146	50.6218	0.714152	0.368342	up	no	1.01982	0.00232715	up	yes	ubiquinone/menaquinone biosynthesis-related protein
AFLA_032770	18.2812	31.3253	60.1428	0.749765	0.337689	up	no	1.67936	1.83e-07	up	yes	dihydroneopterin aldolase domain protein
AFLA_032830	289.297	185.351	137.38	-0.694147	0.419674	down	no	-1.12872	2.54e-07	down	yes	cyclin-like protein (Clg1), putative
AFLA_032960	0.801601	0.36415	0.159811	-1.22128	0.605527	down	no	-2.36479	0.0398183	down	yes	MFS transporter, putative
AFLA_033050	1.52639	1.45047	0.370956	-0.0938893	1	down	no	-1.9978	0.00552784	down	yes	conserved hypothetical protein
AFLA_033210	1.40008	2.4148	4.8444	0.73356	0.536042	up	no	1.71181	0.00627171	up	yes	MFS allantoate transporter, putative
AFLA_033400	29.2972	45.3484	70.387	0.573991	0.479139	up	no	1.20011	3.82e-05	up	yes	mannosidase MsdS
AFLA_033440	7.16151	3.95227	2.63678	-0.857928	0.345821	down	no	-1.45372	0.000813562	down	yes	general amidase, putative
AFLA_033530	105.151	48.2199	42.6181	-1.14551	0.25174	down	no	-1.2954	7.87e-10	down	yes	nuclear mRNA splicing factor, putative
AFLA_033570	29.5126	16.2358	8.39031	-0.903757	0.531957	down	no	-1.80429	1.51e-10	down	yes	SSU processome component Utp10, putative
AFLA_033600	38.0463	29.2076	17.4847	-0.345146	0.829	down	no	-1.10049	0.00616023	down	yes	conserved hypothetical protein
AFLA_033610	30.0795	64.199	69.0185	1.03893	0.10295	up	no	1.14365	0.000244306	up	yes	mismatch-specific thymine-DNA glycosylase, putative
AFLA_033670	526.032	302.5	213.383	-0.782236	0.455563	down	no	-1.32377	1.78e-09	down	yes	lipid transfer protein, putative
AFLA_033750	135.76	72.393	54.5534	-0.897392	0.211426	down	no	-1.30285	9.83e-06	down	yes	H+/nucleoside cotransporter
AFLA_033950	11.6958	29.7324	38.6099	1.39171	0.0980332	up	no	1.71081	1.27e-06	up	yes	conserved hypothetical protein
AFLA_033960	8.32011	19.0834	18.7779	1.22668	0.129027	up	no	1.1564	0.0127212	up	yes	phenylacrylic acid decarboxylase, putative
AFLA_033970	43.5059	40.2157	19.4102	-0.149585	0.94382	down	no	-1.19672	3.87e-05	down	yes	conserved hypothetical protein
AFLA_033980	1276.01	516.356	554.151	-1.30165	0.068803	down	no	-1.19736	3.89e-08	down	yes	cytosolic large ribosomal subunit protein L7A
AFLA_034060	326.749	192.706	137.946	-0.759264	0.335675	down	no	-1.26499	5.36e-08	down	yes	hypothetical protein
AFLA_034170	57.623	91.2225	128.246	0.656482	0.419553	up	no	1.1325	3.63e-05	up	yes	MAP kinase FUS3/KSS1
AFLA_034180	13.9794	11.5165	29.7	-0.276023	0.866644	down	no	1.07426	0.00519643	up	yes	uroporphyrinogen-III synthase (UroS), putative
AFLA_034320	168.469	312.332	439.602	0.871788	0.181194	up	no	1.33349	1.3e-06	up	yes	HIT domain protein
AFLA_034570	24.1338	11.902	11.3424	-1.03036	0.263318	down	no	-1.09372	0.0280245	down	yes	hypothetical protein
AFLA_034740	16.6451	5.91069	6.86127	-1.55154	0.101202	down	no	-1.3114	0.000539572	down	yes	conserved hypothetical protein
AFLA_034750	28.4161	11.0698	12.9522	-1.4219	0.185092	down	no	-1.16261	0.00222335	down	yes	NADPH-dependent FMN reductase Lot6, putative
AFLA_034870	50.9061	18.3502	21.0275	-1.45656	0.101115	down	no	-1.29686	1.61e-06	down	yes	conserved hypothetical protein
AFLA_034920	4.55349	2.45105	2.01763	-1.00107	0.578558	down	no	-1.21427	0.0153521	down	yes	glucan endo-1,3-alpha-glucosidase agn1 precursor, putative
AFLA_034930	4.22896	3.24442	0.696213	-0.480812	0.923424	down	no	-2.61009	0.0217816	down	yes	hypothetical protein
AFLA_035070	2649.81	915.039	669.111	-1.62359	0.0604709	down	no	-2.09949	6.54e-22	down	yes	conserved hypothetical protein
AFLA_035080	71.7894	29.604	27.0461	-1.34098	0.0896494	down	no	-1.5039	1.85e-10	down	yes	glucose-methanol-choline (gmc) oxidoreductase, putative
AFLA_035370	50.2431	22.2096	18.597	-1.19306	0.325342	down	no	-1.41546	1.57e-09	down	yes	WD repeat protein
AFLA_035380	44.7093	22.1226	18.0933	-1.02407	0.566383	down	no	-1.27159	0.0168122	down	yes	hypothetical protein
AFLA_035630	11.2881	5.27011	3.89295	-1.05853	0.367433	down	no	-1.53684	0.000278715	down	yes	conserved hypothetical protein
AFLA_035640	1.00456	0.451032	0.186311	-1.14359	0.47605	down	no	-2.40363	0.0070597	down	yes	MFS sugar transporter, putative
AFLA_035670	15.9715	5.72834	3.47146	-1.53665	0.18919	down	no	-2.19916	0.000486533	down	yes	conserved hypothetical protein
AFLA_035700	13.9167	6.92419	37.6628	-1.13881	0.331649	down	no	1.32059	0.00463746	up	yes	conserved hypothetical protein
AFLA_035710	11.7453	3.61206	1.28927	-1.7575	0.17219	down	no	-3.18141	0.00144469	down	yes	hscarg dehydrogenase, putative
AFLA_035800	3.15769	2.27488	0.803632	-0.494778	0.86753	down	no	-2.04207	0.00124392	down	yes	endo xylanase, putative
AFLA_035900	3.91314	5.39069	8.95074	0.478644	0.721575	up	no	1.1931	0.00586596	up	yes	integral membrane protein
AFLA_036000	7.96786	11.0848	16.6522	0.458573	0.68744	up	no	1.03048	0.0106513	up	yes	salicylate hydroxylase, putative
AFLA_036030	5.14508	2.99583	1.92357	-0.833842	0.441204	down	no	-1.48889	0.017161	down	yes	asparaginase, putative
AFLA_036130	150.535	393.686	333.64	1.37023	0.0614445	up	no	1.08832	5.06e-05	up	yes	14-alpha sterol demethylase Cyp51A
AFLA_036310	5.32238	2.54186	1.67363	-1.09002	0.567557	down	no	-1.73915	0.0448363	down	yes	hypothetical protein
AFLA_036370	793.514	571.874	381.087	-0.557015	0.70916	down	no	-1.16528	3.95e-07	down	yes	phosphoenolpyruvate carboxykinase AcuF
AFLA_036700	2.73412	3.62989	5.98112	0.417571	0.805443	up	no	1.09941	0.0392103	up	yes	conserved hypothetical protein
AFLA_036800	7.56756	12.7206	3.71265	0.656804	0.563738	up	no	-1.08701	0.0304164	down	yes	ABC transporter, putative
AFLA_036810	158.627	31.6407	62.7354	-2.49917	0.313408	down	no	-1.46785	1.51e-10	down	yes	NAD dependent epimerase/dehydratase, putative
AFLA_036880	40.6779	20.1574	17.9676	-1.03363	0.109502	down	no	-1.1917	1.12e-05	down	yes	spindle checkpoint protein bubr1, putative
AFLA_036890	11.3961	5.36334	4.57629	-1.10874	0.42894	down	no	-1.30314	0.0011113	down	yes	checkpoint protein kinase (SldA), putative
AFLA_036930	15.3624	6.84527	7.62068	-1.16775	0.0822989	down	no	-1.00416	0.00154429	down	yes	conserved hypothetical protein
AFLA_036950	30.346	10.8429	11.4402	-1.52886	0.0611789	down	no	-1.45208	0.00284547	down	yes	hypothetical protein
AFLA_036960	14.2131	5.85771	5.55629	-1.32717	0.100805	down	no	-1.39447	0.00247843	down	yes	O-methyltransferase, putative
AFLA_036990	31.0943	10.0695	6.81281	-1.64557	0.372878	down	no	-2.15883	4.52e-18	down	yes	DNA polymerase V, putative
AFLA_037030	11.9262	24.6896	25.0125	1.05811	0.103114	up	no	1.057	0.000922198	up	yes	SCF ubiquitin ligase subunit CulC, putative
AFLA_037050	11.2889	6.16159	3.25286	-0.911536	0.611266	down	no	-1.77741	5.2e-13	down	yes	HEAT repeat protein (DRIM), putative
AFLA_037100	63.848	33.6115	20.9019	-0.964132	0.425389	down	no	-1.60307	3.94e-14	down	yes	DNA-directed RNA polymerase I subunit beta (Rpa2), putative
AFLA_037130	2.7081	1.66988	0.654814	-0.670879	0.785439	down	no	-2.05571	0.00605876	down	yes	alpha/beta superfamily hydrolase, putative
AFLA_037260	1.30022	0.495264	0.149132	-1.39192	0.252462	down	no	-3.14236	5.76e-05	down	yes	MFS quinate transporter, putative
AFLA_037780	55.9674	95.3268	119.762	0.741659	0.300125	up	no	1.04391	0.000156811	up	yes	actin-related protein 2/3 complex subunit 1A, putative
AFLA_037900	90.3894	40.4688	38.1614	-1.16458	0.0600457	down	no	-1.24054	1.99e-06	down	yes	methyltransferase, putative
AFLA_038200	11.542	4.4623	2.59665	-1.46866	0.144284	down	no	-2.27127	2.88e-06	down	yes	short-chain dehydrogenases/reductase, putative
AFLA_038300	30.1122	13.024	10.4319	-1.31349	0.104013	down	no	-1.63192	1.21e-08	down	yes	sugar transporter, putative
AFLA_038310	2.98536	5.39676	8.36398	0.832899	0.269973	up	no	1.44192	4.12e-05	up	yes	PKS-like enzyme, putative
AFLA_038340	12.6177	4.42208	4.7874	-1.51962	0.164085	down	no	-1.38894	9.27e-05	down	yes	conserved hypothetical protein
AFLA_038390	1.35055	2.20736	3.36585	0.654019	0.678753	up	no	1.27199	0.0366218	up	yes	sarcosine oxidase, putative
AFLA_038530	0.200893	0.140128	0.863609	-0.558895	0.957683	down	no	2.03113	0.0306817	up	yes	elastinolytic metalloproteinase Mep
AFLA_038560	1.06	1.55145	7.19629	0.546875	0.824721	up	no	2.75294	4.29e-06	up	yes	conserved hypothetical protein
AFLA_038780	198.156	147.615	41.3207	-0.385963	0.848568	down	no	-2.23535	0.00275931	down	yes	amino acid transporter, putative
AFLA_038840	3.1418	6.47732	7.25318	1.04679	0.258124	up	no	1.18495	0.0122287	up	yes	conserved hypothetical protein
AFLA_038870	1.37046	5.58232	8.41534	2.05279	0.105796	up	no	2.60195	0.000315273	up	yes	integral membrane protein
AFLA_038940	7.14635	11.0708	16.3133	0.602486	0.538532	up	no	1.13764	0.0110639	up	yes	short-chain dehydrogenase/reductase, putative
AFLA_039010	2.69076	1.50503	6.94127	-0.842699	0.573194	down	no	1.33649	0.00578466	up	yes	conserved hypothetical protein
AFLA_039100	15.7031	5.88768	6.15972	-1.41293	0.151293	down	no	-1.33154	0.00168492	down	yes	conserved hypothetical protein
AFLA_039200	2.06794	0.968822	12.4187	-1.16968	0.305723	down	no	2.5097	2.51e-05	up	yes	cytochrome P450, putative
AFLA_039210	0.278033	0.298037	11.1193	0.0310582	1	up	no	5.25904	2.46e-11	up	yes	cytochrome P450, putative
AFLA_039220	1.6805	0.800377	13.1434	-1.10228	0.607903	down	no	2.86319	0.000107235	up	yes	cytochrome P450, putative
AFLA_039230	0.386805	0.556339	12.8209	0.510215	0.877397	up	no	4.96363	1.15e-13	up	yes	short-chain dehydrogenase, putative
AFLA_039280	0.247737	0.981395	2.42543	1.85511	0.535162	up	no	3.10971	0.0257576	up	yes	conserved hypothetical protein
AFLA_039540	1.48479	0.714241	0.473873	-1.11611	0.537417	down	no	-1.66455	0.048021	down	yes	conserved hypothetical protein
AFLA_039590	9.63428	5.69884	3.15862	-0.75321	0.628339	down	no	-1.60747	0.00599025	down	yes	conserved hypothetical protein
AFLA_039600	696.02	398.802	284.88	-0.839754	0.498371	down	no	-1.31792	0.0362956	down	yes	conserved hypothetical protein
AFLA_039730	2.86347	2.88115	1.01412	0.0336258	1	up	no	-1.51839	0.00613554	down	yes	conserved hypothetical protein
AFLA_039760	3.4031	2.75015	1.5042	-0.324746	0.863822	down	no	-1.20857	0.0127135	down	yes	conserved hypothetical protein
AFLA_039840	2.44358	3.5195	6.57084	0.548454	0.711552	up	no	1.41954	0.00992762	up	yes	alpha/beta hydrolase, putative
AFLA_039890	1.5978	3.59003	30.8976	1.05807	0.675759	up	no	4.11198	1.3e-05	up	yes	conserved hypothetical protein
AFLA_039900	1.50965	2.91028	24.9049	0.918206	0.429342	up	no	3.97188	2.52e-16	up	yes	conserved hypothetical protein
AFLA_039990	0.714786	1.97717	5.54793	1.4452	0.23565	up	no	2.91544	8.04e-06	up	yes	liver carboxylesterase, putative
AFLA_040000	0.245048	1.51389	4.56991	2.59705	0.162521	up	no	4.18086	1.82e-05	up	yes	carboxylesterase, putative
AFLA_040040	11.2303	4.49392	1.72005	-1.38084	0.112802	down	no	-2.77545	0.00664806	down	yes	antigenic cell wall galactomannoprotein, putative
AFLA_040060	3.55824	0.976102	0.988013	-1.80869	0.241705	down	no	-1.82438	0.00599867	down	yes	TPR domain protein
AFLA_040080	0.306364	0.65171	1.11526	1.10834	0.328074	up	no	1.83464	0.00207981	up	yes	hydantoin utilization protein A, putative
AFLA_040190	34.8805	16.2463	7.83106	-1.08267	0.579051	down	no	-2.11783	0.0114109	down	yes	short-chain dehydrogenase/reductase family protein, putative
AFLA_040200	9.06054	13.4215	22.4561	0.544426	0.60653	up	no	1.26559	0.00325753	up	yes	hydroxyacyl dehydrogenase, putative
AFLA_040210	19.7542	29.948	44.4689	0.597308	0.579562	up	no	1.12593	0.00402482	up	yes	conserved hypothetical protein
AFLA_040310	40.8134	56.1733	21.2274	0.389685	0.770671	up	no	-1.00314	2.2e-05	down	yes	poly(A) polymerase pla1, putative
AFLA_040320	13.3084	16.1585	6.43767	0.191551	0.980624	up	no	-1.13016	0.012841	down	yes	P38 MAPK, putative
AFLA_040360	12.1133	6.96837	5.61482	-0.799926	0.358081	down	no	-1.11177	0.0082987	down	yes	conserved hypothetical protein
AFLA_040410	27.0843	11.7297	9.28361	-1.23476	0.239854	down	no	-1.53349	8.22e-08	down	yes	conserved hypothetical protein
AFLA_040760	15.2389	14.0602	33.5565	-0.194332	0.949927	down	no	1.06833	0.0350293	up	yes	conserved hypothetical protein
AFLA_040770	9.30116	7.17187	4.37969	-0.418419	0.783944	down	no	-1.11859	0.0329157	down	yes	early growth response protein 3, egr-3, putative
AFLA_040820	3.36204	4.96261	10.4558	0.555107	0.70409	up	no	1.59111	3.31e-05	up	yes	kinesin light chain, putative
AFLA_040890	2.85762	1.30507	0.686011	-1.18026	0.382093	down	no	-2.13681	0.00312169	down	yes	dienelactone hydrolase, putative
AFLA_040990	2.06153	0.823212	0.640823	-1.28439	0.489455	down	no	-1.67342	0.0267571	down	yes	conserved hypothetical protein
AFLA_041200	3.38964	0.907376	1.35993	-1.96589	0.126322	down	no	-1.35753	0.0311115	down	yes	aminotransferase, putative
AFLA_041260	402.885	147.412	117.324	-1.47826	0.196698	down	no	-1.7688	2.07e-18	down	yes	ribosome associated DnaJ chaperone Zuotin, putative
AFLA_041300	0.484324	0.638939	1.4109	0.357546	0.884757	up	no	1.4888	0.0266201	up	yes	conserved hypothetical protein
AFLA_041440	616.666	482.277	333.386	-0.469484	0.743273	down	no	-1.00082	0.0283313	down	yes	dienelactone hydrolase
AFLA_041580	255.759	159.3	119.158	-0.647179	0.537417	down	no	-1.07295	0.000752014	down	yes	estradiol 17 beta-dehydrogenase, putative
AFLA_041590	211.692	145.529	93.7162	-0.513891	0.641988	down	no	-1.15888	1.71e-05	down	yes	peroxisomal multifunctional beta-oxidation protein (MFP), putative
AFLA_041660	11.0222	4.75874	4.78552	-1.23342	0.110123	down	no	-1.20956	0.000837469	down	yes	dimethylaniline monooxygenase, putative
AFLA_041710	2081.5	615.022	710.406	-1.77833	0.0603662	down	no	-1.54356	1.98e-13	down	yes	60S ribosomal protein L7
AFLA_041840	62.5984	151.337	308.048	1.30535	0.442241	up	no	2.2999	4.07e-12	up	yes	glycine dehydrogenase
AFLA_041910	89.7186	49.6392	20.8019	-0.916353	0.338526	down	no	-2.20225	2.36e-22	down	yes	pyridine nucleotide-disulphide oxidoreductase, putative
AFLA_041990	1666.49	730.08	759.6	-1.18524	0.101115	down	no	-1.13306	1.65e-07	down	yes	60S ribosomal protein L17
AFLA_042150	17.0756	29.2285	50.3362	0.7938	0.303518	up	no	1.54579	4.74e-06	up	yes	catechol dioxygenase, putative
AFLA_042480	64.3058	18.526	8.70626	-1.94273	0.345821	down	no	-3.00592	2.26e-06	down	yes	zinc-binding oxidoreductase CipB
AFLA_042550	58.0284	28.4838	24.038	-1.05488	0.500292	down	no	-1.25383	7.31e-07	down	yes	small nucleolar ribonucleoprotein complex subunit Utp15, putative
AFLA_042970	26.2989	16.0184	12.725	-0.741724	0.619614	down	no	-1.03078	0.000202012	down	yes	nuclear protein (Sgd1), putative
AFLA_043210	12.8174	6.2822	4.40539	-1.04291	0.639088	down	no	-1.50756	0.00158922	down	yes	RNA processing protein Grc3, putative
AFLA_043220	85.791	26.5058	28.5229	-1.72269	0.348736	down	no	-1.56304	1.75e-09	down	yes	conserved hypothetical protein
AFLA_043380	101.174	87.2594	43.322	-0.254888	0.886937	down	no	-1.27478	0.000173018	down	yes	actin cortical patch protein Sur7, putative
AFLA_043390	257.45	153.615	100.224	-0.752615	0.49809	down	no	-1.34594	9.38e-11	down	yes	Hsp70 chaperone (BiP), putative
AFLA_043410	27.6405	12.3942	11.9883	-1.1845	0.285797	down	no	-1.19522	2.09e-05	down	yes	MYB DNA-binding domain protein
AFLA_043420	4.96366	10.2675	11.126	1.04915	0.121573	up	no	1.15004	0.000805375	up	yes	UDP-glucose:glycoprotein glucosyltransferase, putative
AFLA_043510	1.45906	1.88806	4.08715	0.335567	0.832354	up	no	1.41554	0.00539227	up	yes	protein kinase domain-containing protein
AFLA_043550	0.132083	0.588067	1.17312	2.06805	0.521424	up	no	3.06332	0.0314793	up	yes	conserved hypothetical protein
AFLA_043660	12.2387	5.69826	5.24198	-1.09494	0.29318	down	no	-1.19536	0.00243617	down	yes	conserved hypothetical protein
AFLA_043920	22.1175	27.2044	46.8389	0.26649	0.880017	up	no	1.05235	0.0075792	up	yes	alpha-tubulin suppressor protein Aats1, putative
AFLA_043970	18.7785	13.92	9.26247	-0.483852	0.707936	down	no	-1.08158	0.00695393	down	yes	enoyl-CoA hydratase
AFLA_043980	1837.21	836.35	612.366	-1.22487	0.194404	down	no	-1.69241	9.45e-15	down	yes	mannitol-1-phosphate dehydrogenase
AFLA_043990	37.6477	31.5241	17.6367	-0.3263	0.86511	down	no	-1.17339	0.00128375	down	yes	conserved hypothetical protein
AFLA_044070	238.663	98.3917	64.2872	-1.36943	0.0912145	down	no	-2.0156	2.6e-14	down	yes	conserved hypothetical protein
AFLA_044200	6.90123	7.82279	17.6982	0.117612	0.977758	up	no	1.28224	0.00962437	up	yes	NRPS-like enzyme, putative
AFLA_044210	5.99326	11.1213	17.84	0.862159	0.362014	up	no	1.53014	0.00139956	up	yes	AMP dependent CoA ligase, putative
AFLA_044230	183.914	90.9432	80.2901	-1.02715	0.269791	down	no	-1.18486	5.42e-08	down	yes	eukaryotic translation initiation factor 3 subunit EifCl, putative
AFLA_044410	30.4618	30.1863	68.2741	0.000728819	1	up	no	1.15813	0.000283148	up	yes	glycerol dehydrogenase, putative
AFLA_044430	61.7835	43.7045	31.5233	-0.556004	0.62621	down	no	-1.01383	7.5e-06	down	yes	conserved hypothetical protein
AFLA_044490	4.18481	4.91133	12.9107	0.12382	1	up	no	1.54378	0.0113162	up	yes	hypothetical protein
AFLA_044590	93.3805	56.6832	43.3148	-0.754705	0.563083	down	no	-1.10035	3.51e-07	down	yes	nonsense-mediated mRNA decay protein (Nmd5), putative
AFLA_044630	47.8071	19.5387	19.8216	-1.31207	0.503225	down	no	-1.24257	5.4e-06	down	yes	conserved hypothetical protein
AFLA_044710	360.35	179.052	163.328	-1.00616	0.144063	down	no	-1.14677	7.35e-08	down	yes	eukaryotic translation initiation factor 3 subunit EifCg, putative
AFLA_044770	5.26991	9.01049	30.9523	0.781509	0.383191	up	no	2.54141	7.65e-12	up	yes	mandelate racemase/muconate lactonizing enzyme family protein
AFLA_044820	199.912	248.688	489.717	0.258361	0.847737	up	no	1.22469	7.41e-06	up	yes	glucose-6-phosphate isomerase
AFLA_045000	9.70699	7.45541	4.13029	-0.40703	0.846994	down	no	-1.27485	0.0369718	down	yes	hypothetical protein
AFLA_045050	3.45886	1.38797	1.0491	-1.32261	0.133537	down	no	-1.73059	0.000945508	down	yes	conserved hypothetical protein
AFLA_045110	13.2819	5.72703	3.35302	-1.25938	0.16656	down	no	-2.05321	2.56e-07	down	yes	phytanoyl-CoA dioxygenase family protein
AFLA_045260	2880.21	7137.32	6126.92	1.29073	0.150168	up	no	1.02953	0.000383601	up	yes	conserved hypothetical protein
AFLA_045290	92.5323	226.268	446.432	1.22389	0.0686252	up	no	2.20263	2.87e-10	up	yes	extracellular endoglucanase/cellulase, putative
AFLA_045330	132.468	69.8081	51.523	-0.966184	0.401392	down	no	-1.37629	3.6e-11	down	yes	eukaryotic translation initiation factor subunit eIF-4F, putative
AFLA_045380	6.08175	2.16782	1.6991	-1.5278	0.0680413	down	no	-1.8738	0.000178736	down	yes	dimeric dihydrodiol dehydrogenase, putative
AFLA_045630	4.25804	7.85375	9.46433	0.912703	0.327284	up	no	1.15564	0.0197287	up	yes	conserved hypothetical protein
AFLA_045680	56.7999	41.3037	26.161	-0.493753	0.829782	down	no	-1.1963	0.000114774	down	yes	GNAT family acetyltransferase, putative
AFLA_046050	39.4876	51.4592	83.4764	0.384445	0.717762	up	no	1.043	0.000745207	up	yes	GDSL Lipase/Acylhydrolase family protein
AFLA_046200	1.04342	0.812843	4.62742	-0.296265	1	down	no	2.17982	0.0415609	up	yes	hypothetical protein
AFLA_046230	152.05	34.697	12.0643	-2.03974	0.192292	down	no	-3.61347	1.2e-13	down	yes	amino acid permease (Dip5), putative
AFLA_046420	117.722	71.4735	58.048	-0.722029	0.326682	down	no	-1.01109	4.52e-05	down	yes	1-acylglycerol-3-phosphate acyltransferase (AtaAp), putative
AFLA_046530	58.7159	29.5052	26.8288	-1.00826	0.355355	down	no	-1.11728	4.62e-06	down	yes	tRNA pseudouridine synthase, putative
AFLA_046640	10.5448	10.8532	45.7049	-0.031424	1	down	no	2.05175	4.03e-12	up	yes	ankyrin repeat-containing protein, putative
AFLA_046710	6.34025	8.68772	15.2448	0.423903	0.826032	up	no	1.23536	0.0254264	up	yes	hypothetical protein
AFLA_046770	3.39839	3.90218	7.56241	0.177947	0.961503	up	no	1.12692	0.032473	up	yes	C6 transcription factor, putative
AFLA_046820	98.2085	103.315	238.056	0.0595589	1	up	no	1.24729	3.82e-05	up	yes	tubulin-specific chaperone Rbl2, putative
AFLA_046830	44.4297	40.2394	187.996	-0.166774	0.985465	down	no	2.02904	5.36e-11	up	yes	flotillin domain protein
AFLA_046860	4.4852	3.80284	1.80324	-0.264626	0.924219	down	no	-1.36438	0.00714333	down	yes	MFS monosaccharide transporter (Hxt8), putative
AFLA_046980	1.88922	3.30017	14.5823	0.745036	0.528048	up	no	2.88518	2.48e-10	up	yes	diphosphonucleoside phosphohydrolase, putative
AFLA_047210	17.8916	32.2316	43.8495	0.81748	0.291276	up	no	1.24987	0.00053703	up	yes	cyclin-dependent protein kinase complex component, putative
AFLA_048200	576.721	202.479	235.095	-1.52488	0.0655045	down	no	-1.28757	6.85e-10	down	yes	pseudouridylate synthase family protein
AFLA_048220	30.1654	16.6603	11.4874	-0.883523	0.322367	down	no	-1.40449	0.000882725	down	yes	hypothetical protein
AFLA_048360	109.637	50.2977	52.657	-1.11817	0.0894207	down	no	-1.04633	8.56e-06	down	yes	RNA processing factor 1
AFLA_048550	11.1103	19.7795	24.9347	0.826062	0.382302	up	no	1.11778	0.026655	up	yes	DNA repair protein Swi5/Sae3, putative
AFLA_048730	77.1799	25.1242	18.5343	-1.6548	0.279431	down	no	-2.04136	4.52e-18	down	yes	conserved hypothetical protein
AFLA_048790	93.8044	238.31	245.4	1.3748	0.0576666	up	no	1.37391	4.14e-07	up	yes	BAR domain protein
AFLA_048840	66.5216	74.0353	154.881	0.149607	0.955875	up	no	1.19905	8.06e-06	up	yes	adenosine kinase, putative
AFLA_048940	2.54957	5.88294	7.85137	1.1151	0.400196	up	no	1.53358	0.0419958	up	yes	conserved hypothetical protein
AFLA_049010	312.277	147.704	116.855	-1.09927	0.0909775	down	no	-1.44325	9.47e-10	down	yes	conserved hypothetical protein
AFLA_049040	83.258	41.4885	34.5973	-1.01688	0.253711	down	no	-1.26074	8.73e-08	down	yes	low-temperature viability protein ltv1
AFLA_049060	46.3822	29.1316	9.75847	-0.683324	0.674951	down	no	-2.2976	1.67e-10	down	yes	conserved hypothetical protein
AFLA_049070	46.2226	35.5895	20.1577	-0.42288	0.753121	down	no	-1.26217	2.15e-07	down	yes	sodium P-type ATPase, putative
AFLA_049190	3.20949	6.56128	8.09033	1.05781	0.229622	up	no	1.3431	0.00485137	up	yes	FAD/FMN-containing isoamyl alcohol oxidase MreA
AFLA_049200	7.09192	4.85126	2.35966	-0.577634	0.788423	down	no	-1.62798	0.0383698	down	yes	hypothetical protein
AFLA_049290	89.9799	53.0384	37.7671	-0.771223	0.320023	down	no	-1.28464	0.00196053	down	yes	citrate synthase Cit1, putative
AFLA_049370	29.7382	36.385	68.1632	0.249881	0.827438	up	no	1.12776	0.000147459	up	yes	short-chain dehydrogenase/reductase family protein, putative
AFLA_049400	2.61101	1.5544	0.4773	-0.842442	0.637489	down	no	-2.52511	0.000215581	down	yes	conserved hypothetical protein
AFLA_049480	52.1483	35.2438	110.521	-0.669731	0.710816	down	no	1.02279	0.000829849	up	yes	amino acid transporter, putative
AFLA_049590	14.083	4.85755	5.48432	-1.55265	0.207089	down	no	-1.40917	0.0220237	down	yes	hypothetical protein
AFLA_049800	0.40149	0.509143	3.09379	0.181812	0.961723	up	no	2.84915	2.94e-05	up	yes	conserved hypothetical protein
AFLA_049840	29.6689	9.97113	9.87231	-1.59312	0.222199	down	no	-1.56829	1.3e-06	down	yes	rRNA processing protein Ipi1, putative
AFLA_049920	109.592	154.092	251.334	0.428118	0.711446	up	no	1.12412	9.54e-05	up	yes	dienelactone hydrolase family protein
AFLA_049960	41.7469	20.1745	19.4236	-1.10001	0.168217	down	no	-1.17584	5.88e-05	down	yes	integral membrane protein
AFLA_050000	2587.39	997.187	1242.87	-1.37087	0.0541815	down	no	-1.05244	2.34e-06	down	yes	ribosomal protein L16a
AFLA_050480	12.9479	11.0993	42.3594	-0.340842	0.927472	down	no	1.61705	2.84e-05	up	yes	ESCRT-II complex component (Vps25), putative
AFLA_050490	42.0607	15.454	14.4718	-1.45473	0.399775	down	no	-1.50391	6.94e-07	down	yes	methyltransferase-like protein 1
AFLA_050530	13.5317	19.509	34.6984	0.495993	0.620642	up	no	1.31037	0.000248214	up	yes	nitrilase, putitive
AFLA_050610	9.80439	18.2884	33.4136	0.949077	0.345821	up	no	1.7913	5.19e-06	up	yes	acid phosphatase PHOa
AFLA_050720	88.0136	38.2919	35.8662	-1.22593	0.302871	down	no	-1.28353	3.1e-08	down	yes	ribosome biogenesis protein Kri1
AFLA_050830	41.7111	66.0075	136.848	0.660749	0.396886	up	no	1.6905	2.8e-09	up	yes	uridine nucleosidase Urh1, putative
AFLA_050870	16.0822	10.5541	6.69193	-0.618739	0.51216	down	no	-1.28499	0.000202012	down	yes	conserved hypothetical protein
AFLA_050950	1637.27	691.68	680.178	-1.2449	0.0833121	down	no	-1.26662	3.22e-09	down	yes	40S ribosomal protein S3, putative
AFLA_051020	23.4192	16.5004	7.96849	-0.535022	0.56387	down	no	-1.5778	2.36e-07	down	yes	conserved hypothetical protein
AFLA_051070	6.01796	4.37776	2.03748	-0.448519	0.719973	down	no	-1.55148	0.000733531	down	yes	tRNA-specific adenosine deaminase, putative
AFLA_051190	192.359	48.6976	23.1351	-2.01444	0.487153	down	no	-3.03137	2.88e-43	down	yes	zinc binding dehydrogenase, putative
AFLA_051240	126.059	318.9	266.401	1.33819	0.0827566	up	no	1.03742	0.0168666	up	yes	MAP kinase kinase (Mkk2), putative
AFLA_051360	375.001	328.15	195.84	-0.28903	0.887247	down	no	-1.03938	0.0210255	down	yes	conserved hypothetical protein
AFLA_051370	63.5269	32.3781	30.2137	-0.969946	0.165637	down	no	-1.06167	2.57e-05	down	yes	phosphoribosyl-aminoimidazole carboxylase
AFLA_051540	67.5496	95.949	160.831	0.490359	0.583382	up	no	1.21148	1.04e-05	up	yes	calnexin
AFLA_051640	14.3938	8.9535	5.99787	-0.688853	0.416697	down	no	-1.26445	0.000419666	down	yes	tRNA (adenine-N(1)-)-methyltransferase
AFLA_051770	119.286	224.374	244.16	0.894967	0.253503	up	no	1.01956	0.037889	up	yes	thioredoxin reductase Trr1/Trr2, putative
AFLA_051890	121.015	53.0902	19.8911	-1.20273	0.0732757	down	no	-2.64789	4.75e-20	down	yes	MFS monosaccharide transporter, putative
AFLA_051900	14.9036	13.3152	7.61474	-0.203333	0.952973	down	no	-1.02583	0.00437798	down	yes	zinc knuckle transcription factor (CnjB), putative
AFLA_051910	17.0476	13.7097	5.81764	-0.313347	0.903251	down	no	-1.57903	0.0123772	down	yes	hypothetical protein
AFLA_051980	1213.08	488.721	458.017	-1.31889	0.0603009	down	no	-1.39939	5.63e-11	down	yes	G-protein complex beta subunit CpcB
AFLA_052210	138.507	56.823	35.5316	-1.32733	0.291276	down	no	-1.95307	3.56e-21	down	yes	ATP-dependent RNA helicase, putative
AFLA_052240	1.35669	1.03068	0.554501	-0.389936	0.863822	down	no	-1.3244	0.0485802	down	yes	C6 transcription factor, putative
AFLA_052250	165.885	63.1387	65.8811	-1.37679	0.0573993	down	no	-1.30069	0.00172525	down	yes	conserved hypothetical protein
AFLA_052400	798.892	339.156	262.884	-1.30079	0.0826523	down	no	-1.67563	1.2e-15	down	yes	isocitrate lyase AcuD
AFLA_052460	16.8492	23.251	36.2097	0.434139	0.69679	up	no	1.07273	0.000151113	up	yes	PE repeat family protein
AFLA_052540	532.348	246.733	249.124	-1.10449	0.0996985	down	no	-1.09737	2.82e-07	down	yes	conserved hypothetical protein
AFLA_052560	53.4406	24.0757	24.7618	-1.15987	0.0896494	down	no	-1.10228	0.000205439	down	yes	conserved hypothetical protein
AFLA_053030	16.7943	2.97914	1.822	-2.67802	0.156524	down	no	-3.35962	2.09e-05	down	yes	hscarg dehydrogenase, putative
AFLA_053060	89.9988	169.713	202.611	0.872398	0.180526	up	no	1.10535	7.84e-05	up	yes	peroxiredoxin 5, prdx5, putative
AFLA_053300	0.199083	0.922884	1.98569	2.1821	0.301267	up	no	3.27985	0.00394046	up	yes	cytochrome P450, putative
AFLA_053310	10.8408	19.2022	49.1273	0.888899	0.570821	up	no	2.21879	1.42e-07	up	yes	vitamin H transporter, putative
AFLA_053360	2.15161	4.6303	7.95282	1.10417	0.15545	up	no	1.84743	1.4e-05	up	yes	conserved hypothetical protein
AFLA_053410	22.3978	13.6868	8.12266	-0.751002	0.457788	down	no	-1.5042	0.000767022	down	yes	conserved hypothetical protein
AFLA_053590	5.75546	7.0784	18.4065	0.231619	0.951924	up	no	1.62851	0.00826685	up	yes	hypothetical protein
AFLA_053680	146.029	79.1662	35.7485	-1.03109	0.638544	down	no	-2.14388	0.0104325	down	yes	conserved hypothetical protein
AFLA_053700	186.807	87.3749	26.0712	-1.18331	0.294329	down	no	-2.89606	2.42e-22	down	yes	conserved hypothetical protein
AFLA_053840	10.0005	5.36977	4.61341	-1.02311	0.315755	down	no	-1.25264	0.000607567	down	yes	conserved hypothetical protein
AFLA_053900	2.97687	2.18297	1.03939	-0.47576	0.797691	down	no	-1.52621	0.0261276	down	yes	conserved hypothetical protein
AFLA_053910	4.55134	3.03504	1.18197	-0.615856	0.575294	down	no	-1.97822	0.00384698	down	yes	pantothenate transporter, putative
AFLA_053930	0.316881	0.424873	1.81557	0.404771	1	up	no	2.53722	0.0480826	up	yes	multicopper oxidase, putative
AFLA_053950	14.1631	25.052	39.8871	0.803627	0.349786	up	no	1.44088	3.19e-05	up	yes	conserved hypothetical protein
AFLA_054080	0.785593	0.530902	0.202973	-0.582038	0.841213	down	no	-1.98821	0.0400845	down	yes	Na(+)/H(+) antiporter, putative
AFLA_054240	17.4736	7.34677	3.77262	-1.2869	0.123769	down	no	-2.27679	3.43e-05	down	yes	conserved hypothetical protein
AFLA_054310	1.65727	0.348186	0.27606	-2.21586	0.0569127	down	no	-2.57631	0.00202551	down	yes	conserved hypothetical protein
AFLA_054360	10.0979	4.40135	2.50565	-1.27003	0.367551	down	no	-2.12247	7.22e-05	down	yes	conserved hypothetical protein
AFLA_054390	4.30638	2.82437	2.03377	-0.633076	0.609481	down	no	-1.11748	0.0205169	down	yes	conserved hypothetical protein
AFLA_054400	2.37256	0.521309	0.247303	-2.22804	0.0904098	down	no	-3.2996	0.000484999	down	yes	conserved hypothetical protein
AFLA_054480	54.5891	24.2986	5.01296	-1.12309	0.474977	down	no	-3.42189	9.7e-10	down	yes	conserved hypothetical protein
AFLA_054490	52.1937	49.114	14.3124	-0.020463	1	down	no	-1.83895	2.86e-05	down	yes	neutral amino acid permease
AFLA_054500	10.6119	7.52476	5.26147	-0.506315	0.628339	down	no	-1.02956	0.024891	down	yes	penicillin-binding protein, putative
AFLA_054530	1.66604	0.865693	0.518738	-0.957658	0.429525	down	no	-1.68724	0.0108674	down	yes	conserved hypothetical protein
AFLA_055450	1368.25	480.986	581.988	-1.53279	0.200719	down	no	-1.22468	3.12e-08	down	yes	translation elongation factor eEF-1 subunit gamma, putative
AFLA_055550	408.755	268.1	204.629	-0.715788	0.582581	down	no	-1.13029	3.35e-07	down	yes	conserved hypothetical protein
AFLA_055680	12.3263	5.5342	5.05797	-1.17607	0.118978	down	no	-1.30388	0.0105458	down	yes	esterase, putative
AFLA_055690	10.5405	7.69833	3.66674	-0.494999	0.927472	down	no	-1.50064	0.00017832	down	yes	ABC drug exporter AtrF
AFLA_055700	17.0382	12.5362	6.04458	-0.49649	0.794599	down	no	-1.5026	0.00011134	down	yes	ATP-binding cassette transporter, putative
AFLA_055740	27.6812	10.0757	5.89568	-1.50416	0.484704	down	no	-2.20534	1.28e-15	down	yes	DEAH-box RNA helicase (Dhr1), putative
AFLA_055980	14.6569	29.7459	30.5682	1.01251	0.116791	up	no	1.03285	0.000722519	up	yes	mannosyl-oligosaccharide glucosidase, putative
AFLA_056050	124.313	46.6387	45.7652	-1.43058	0.238255	down	no	-1.4263	1.77e-09	down	yes	ribosomal large subunit biogenesis protein MAK16, putative
AFLA_056130	5.16567	3.54566	1.32781	-0.570838	0.815031	down	no	-1.96918	0.0151218	down	yes	conserved hypothetical protein
AFLA_056280	3985.96	1695.62	1442.22	-1.35834	0.0912379	down	no	-1.5868	0.000194854	down	yes	conserved hypothetical protein
AFLA_056360	48.6264	26.917	20.8215	-0.884501	0.515218	down	no	-1.30274	0.000626989	down	yes	glyoxalase family protein, putative
AFLA_056400	1.17339	0.875439	0.164832	-0.505481	0.927807	down	no	-2.88844	0.0273835	down	yes	conserved hypothetical protein
AFLA_056410	1.39756	0.359482	0.216787	-1.98276	0.140425	down	no	-2.74008	0.0178201	down	yes	hypothetical protein
AFLA_056430	1.46905	1.05981	0.448304	-0.51375	0.812459	down	no	-1.778	0.0127031	down	yes	efflux pump antibiotic resistance protein, putative
AFLA_056440	366.705	329.596	128.467	-0.206738	0.946855	down	no	-1.58824	5.19e-06	down	yes	conserved hypothetical protein
AFLA_056460	56.4285	49.2677	23.8712	-0.243066	0.914118	down	no	-1.30786	3.36e-08	down	yes	histidine kinase 1, 2, 3 plant, putative
AFLA_056520	20.218	8.44268	5.48325	-1.26724	0.377189	down	no	-1.8562	1.74e-10	down	yes	conserved hypothetical protein
AFLA_056580	11.4283	25.2736	51.6418	1.12635	0.0958253	up	no	2.12546	3.22e-09	up	yes	conserved hypothetical protein
AFLA_056630	52.8792	80.1163	106.498	0.643284	0.527816	up	no	1.02188	0.0238056	up	yes	UPF0187 domain membrane protein
AFLA_056700	16.6453	25.7591	38.8063	0.619394	0.447826	up	no	1.18473	0.000240396	up	yes	DUF89 domain protein
AFLA_056760	0.739281	0.172902	0.0872651	-2.16019	0.488044	down	no	-3.22323	0.0464669	down	yes	conserved hypothetical protein
AFLA_056830	138.51	258.266	294.551	0.847815	0.267191	up	no	1.01669	0.00048077	up	yes	RNAse III, putative
AFLA_056930	24.0522	9.10968	11.7561	-1.44896	0.271518	down	no	-1.13169	0.00505985	down	yes	carboxyphosphonoenolpyruvate phosphonomutase-like protein
AFLA_057040	2.14249	0.36713	0.20018	-2.56859	0.597025	down	no	-3.32502	0.016692	down	yes	conserved hypothetical protein
AFLA_057140	85.8394	179.829	366.042	1.00801	0.214354	up	no	2.01834	3.74e-11	up	yes	nucleoside-diphosphate-sugar epimerase, putative
AFLA_057150	14.4258	7.39285	34.04	-0.931124	0.584797	down	no	1.24427	0.0325349	up	yes	conserved hypothetical protein
AFLA_057320	0.618528	0.473535	0.0696647	-0.445615	1	down	no	-3.11087	0.0139289	down	yes	cytochrome P450, putative
AFLA_057330	2.12145	0.88824	0.297702	-1.30318	0.265587	down	no	-2.85676	0.00627171	down	yes	conserved hypothetical protein
AFLA_057510	0.32148	0.143118	0.0224814	-1.24639	0.67503	down	no	-3.88278	0.0249191	down	yes	monocarboxylate transporter, putative
AFLA_057560	5.56678	2.39828	1.44793	-1.23599	0.150901	down	no	-1.99854	0.0091651	down	yes	conserved hypothetical protein
AFLA_057570	3.90332	2.10666	1.17917	-0.910294	0.281971	down	no	-1.75429	1.94e-05	down	yes	conserved hypothetical protein
AFLA_057640	138.412	50.0667	54.2352	-1.53126	0.139185	down	no	-1.37911	1.51e-10	down	yes	60S ribosome biogenesis protein Sqt1, putative
AFLA_057720	1.14597	0.0796134	0	-3.74843	0.152187	down	no	#NAME?	0.00877445	down	yes	hypothetical protein
AFLA_057730	1.70545	0.562515	0.0595095	-1.56053	0.608465	down	no	-4.83249	0.000270518	down	yes	DUF1275 domain protein
AFLA_057810	41.2654	6.40418	7.57888	-2.59919	0.399775	down	no	-2.37769	0.000976833	down	yes	conserved hypothetical protein
AFLA_057940	32.4909	58.6239	78.1879	0.752144	0.602929	up	no	1.15703	0.0148125	up	yes	conserved hypothetical protein
AFLA_057960	1.25397	1.76612	14.7686	0.428058	0.889416	up	no	3.49111	1.96e-08	up	yes	conserved hypothetical protein
AFLA_057980	3524.17	2787.73	1820.92	-0.440024	0.805443	down	no	-1.06691	0.00546681	down	yes	conserved hypothetical protein
AFLA_058070	37.9314	21.7478	17.7988	-0.909606	0.345821	down	no	-1.19317	0.000148564	down	yes	alcohol dehydrogenase, zinc-containing, putative
AFLA_058090	0.638303	0.439253	0.0771337	-0.568376	0.878931	down	no	-3.05184	0.0273592	down	yes	serine/threonine protein phosphatase PP1, putative
AFLA_058240	19.1961	6.94096	7.74024	-1.42013	0.128783	down	no	-1.2935	0.000688288	down	yes	conserved hypothetical protein
AFLA_058290	1.94993	1.56764	8.88799	-0.332551	0.930482	down	no	2.15908	5.87e-05	up	yes	conserved hypothetical protein
AFLA_058470	13.1613	10.9169	6.27441	-0.242463	0.919381	down	no	-1.07793	0.017228	down	yes	C-4 methylsterol oxidase, putative
AFLA_058500	17.643	11.4918	4.99492	-0.708725	0.694533	down	no	-1.93563	9.8e-06	down	yes	WD-repeat protein, putative
AFLA_058630	7.52331	7.2922	1.74827	-0.108395	1	down	no	-2.16271	2.26e-06	down	yes	D-mandelate dehydrogenase, putative
AFLA_058750	2.50404	0.976256	1.10134	-1.35542	0.13425	down	no	-1.20218	0.0301906	down	yes	conserved hypothetical protein
AFLA_058790	55.8892	29.7473	25.2551	-0.906018	0.227206	down	no	-1.13533	0.000154541	down	yes	exosome complex subunit Rrp46, putative
AFLA_058890	8.24584	2.60372	2.76836	-1.75362	0.0755593	down	no	-1.70072	0.0147617	down	yes	oxidoreductase, putative
AFLA_058950	35.6161	34.321	110.609	-0.123741	1	down	no	1.5408	9.07e-07	up	yes	spore wall maturation protein DIT1, putative
AFLA_058960	55.9078	64.6361	143.251	0.158044	0.922167	up	no	1.28508	2.09e-05	up	yes	hypothetical protein
AFLA_058970	58.3734	76.0433	161.914	0.344696	0.719973	up	no	1.40665	8.6e-07	up	yes	cytochrome P450, putative
AFLA_059060	22.2601	8.64521	6.43822	-1.38661	0.0534453	down	no	-1.79553	1.99e-12	down	yes	conserved hypothetical protein
AFLA_059120	1.29819	0.737894	0.4838	-0.88918	0.447089	down	no	-1.50448	0.0350141	down	yes	fumarylacetoacetate hydrolase, putative
AFLA_059210	1.79268	2.53848	6.36013	0.523026	0.74834	up	no	1.81526	0.00119439	up	yes	conserved hypothetical protein
AFLA_059430	3.92054	8.31538	0.885945	1.03469	0.518096	up	no	-2.15382	0.0346672	down	yes	hypothetical protein
AFLA_059460	61.9771	46.5943	9.15346	-0.514027	0.75524	down	no	-2.86314	1.11e-08	down	yes	conserved hypothetical protein
AFLA_059470	61.9695	43.1597	28.5181	-0.527946	0.778837	down	no	-1.16258	3.32e-07	down	yes	LipA and NB-ARC domain protein
AFLA_059690	3.75948	7.03384	14.0935	0.804135	0.670107	up	no	1.79462	0.0164831	up	yes	conserved hypothetical protein
AFLA_059700	0.091556	0.337789	0.947855	1.73696	0.709034	up	no	3.2656	0.0139115	up	yes	conserved hypothetical protein
AFLA_059740	3.89135	1.69702	1.49787	-1.27618	0.214285	down	no	-1.47215	0.0058976	down	yes	conserved hypothetical protein
AFLA_059790	6.7251	10.6805	27.7346	0.654338	0.496603	up	no	2.00222	1.19e-07	up	yes	alcohol dehydrogenase, putative
AFLA_059820	57.7595	70.7244	189.584	0.29545	0.810646	up	no	1.68361	4.9e-09	up	yes	conserved hypothetical protein
AFLA_059830	7.25003	8.6548	30.866	0.26593	0.868342	up	no	2.07947	7.55e-10	up	yes	glucose dehydrogenase, putative
AFLA_059950	9.06655	43.0285	26.0758	2.22739	0.0541815	up	no	1.43875	0.000436538	up	yes	oxidoreductase, FAD-binding, putative
AFLA_059960	11.224	6.63839	5.33764	-0.81546	0.66583	down	no	-1.17994	0.0170415	down	yes	conserved hypothetical protein
AFLA_060290	15.2954	9.11568	6.58285	-0.745609	0.322367	down	no	-1.20898	5.06e-05	down	yes	isochorismatase family protein family
AFLA_060330	0.363144	0.276807	0.0219259	-0.354508	1	down	no	-4.11997	0.0281249	down	yes	conserved hypothetical protein
AFLA_060430	0.373858	0.187457	2.09227	-1.16582	0.832386	down	no	2.37436	0.00688431	up	yes	conserved hypothetical protein
AFLA_060630	2.91404	4.62279	8.72087	0.672242	0.595497	up	no	1.55368	0.0012941	up	yes	conserved hypothetical protein
AFLA_060640	1.86749	2.86853	4.75642	0.600884	0.548062	up	no	1.32373	0.000491831	up	yes	ankyrin repeat domain protein, putative
AFLA_060840	2.78931	1.99276	1.00465	-0.534177	0.739296	down	no	-1.52257	0.0243514	down	yes	multidrug resistance-associated protein, putative
AFLA_060850	3.50574	2.75076	1.58972	-0.386851	0.829782	down	no	-1.18298	0.0392225	down	yes	multidrug resistance-associated protein, putative
AFLA_060860	6.32974	2.45217	1.89069	-1.45895	0.33808	down	no	-1.78615	0.00137979	down	yes	conserved hypothetical protein
AFLA_060870	14.211	6.63622	3.28203	-1.18529	0.431335	down	no	-2.16118	2.21e-05	down	yes	conserved hypothetical protein
AFLA_060880	17.038	9.83875	8.40453	-0.870332	0.327484	down	no	-1.09185	0.000960592	down	yes	amino acid permease, putative
AFLA_061040	8.80102	4.19106	3.13328	-1.14252	0.176025	down	no	-1.56867	3.43e-06	down	yes	alpha-xylosidase, putative
AFLA_061110	132.601	36.7721	20.5313	-1.7888	0.306572	down	no	-2.68364	1.08e-05	down	yes	mono- and diacylglycerol lipase precursor, putative
AFLA_061320	2.97527	1.85497	1.22932	-0.729159	0.543798	down	no	-1.3329	0.0143756	down	yes	pyruvate carboxylase, putative
AFLA_061480	13.6906	28.2196	28.9389	1.03777	0.101868	up	no	1.0496	0.0273859	up	yes	tetracycline-efflux transporter, putative
AFLA_061510	11.4023	7.09115	4.97704	-0.713891	0.435427	down	no	-1.21129	6.86e-05	down	yes	zinc finger protein, cchc domain containing protein, putative
AFLA_062100	410.132	235.312	212.726	-0.886491	0.385013	down	no	-1.05566	2.16e-06	down	yes	HAD superfamily hydrolase, putative
AFLA_062280	0.0508865	0.262441	0.65916	2.47717	0.645272	up	no	3.76988	0.0408959	up	yes	beta-galactosidase, putative
AFLA_062290	8.7299	11.068	33.2154	0.287569	0.876886	up	no	1.90513	3.13e-09	up	yes	ankyrin repeat-containing protein, putative
AFLA_062520	16.4352	33.815	38.2186	1.07575	0.14224	up	no	1.21295	0.000484529	up	yes	COPII-coated vesicle protein (Erv41), putative
AFLA_062640	7.37419	10.2945	22.6593	0.52976	0.821965	up	no	1.65054	0.0397222	up	yes	conserved hypothetical protein
AFLA_062660	2.702	1.3886	0.449571	-0.988572	0.599105	down	no	-2.56502	0.000112089	down	yes	conserved hypothetical protein
AFLA_062670	160.725	57.8598	63.8278	-1.48487	0.0853218	down	no	-1.32001	2.36e-08	down	yes	60S ribosomal subunit biogenesis protein Nop16, putative
AFLA_062740	5.4047	3.8501	2.02554	-0.528158	0.796641	down	no	-1.41678	0.0147042	down	yes	dihydrodiol dehydrogenase, putative
AFLA_062820	3.72382	1.25607	15.6434	-1.60565	0.210611	down	no	2.05765	4.13e-09	up	yes	polyketide synthase, putative
AFLA_062830	110.797	56.6482	437.23	-0.99469	0.167924	down	no	1.92809	6.3e-12	up	yes	monoxygenase, putative
AFLA_062840	66.3928	65.2948	223.486	-0.0456785	1	down	no	1.70677	1.86e-09	up	yes	conserved hypothetical protein
AFLA_062850	63.2248	102.45	138.774	0.68129	0.361011	up	no	1.08936	6.48e-05	up	yes	fatty acid desaturase, putative
AFLA_062860	13.2783	5.31655	54.8707	-1.39093	0.0622689	down	no	1.9784	8.59e-07	up	yes	polyketide synthase, putative
AFLA_062890	93.9824	165.334	581.69	0.757636	0.730768	up	no	2.50631	1.32e-05	up	yes	hypothetical protein
AFLA_063120	5.30212	6.48341	30.5104	0.317282	0.854407	up	no	2.53275	3.98e-12	up	yes	isoamyl alcohol oxidase, putative
AFLA_063200	3.192	3.43911	1.22613	0.0517193	1	up	no	-1.406	0.0246119	down	yes	choline transport protein, putative
AFLA_063340	5.56147	2.57074	2.36984	-1.13091	0.258719	down	no	-1.24142	0.0354353	down	yes	conserved hypothetical protein
AFLA_063410	0.505377	0.534572	2.9523	0.00305509	1	up	no	2.50469	4.05e-06	up	yes	conserved hypothetical protein
AFLA_063440	12.6429	6.34868	4.09021	-1.11908	0.302938	down	no	-1.77392	4.94e-05	down	yes	transesterase (LovD), putative
AFLA_063500	0.26603	1.67604	3.6801	2.52105	0.159919	up	no	3.65126	0.000377522	up	yes	xylosidase/glycosyl hydrolase, putative
AFLA_063570	4.48565	3.66932	1.87797	-0.326506	0.886937	down	no	-1.26485	0.0155369	down	yes	monooxygenase, putative
AFLA_063580	4.51084	3.24788	1.79736	-0.48102	0.741135	down	no	-1.31626	0.0261276	down	yes	short chain type dehydrogenase, putative
AFLA_063620	0.0530128	0.0876233	0.615745	0.644237	1	up	no	3.47019	0.0114591	up	yes	pantothenate transporter, putative
AFLA_063710	0.518686	0.186022	0.0330525	-1.59532	0.599565	down	no	-4.16394	0.0330911	down	yes	conserved hypothetical protein
AFLA_063720	0.800155	0.450385	0.150156	-0.908971	0.543798	down	no	-2.46849	0.001553	down	yes	conserved hypothetical protein
AFLA_064200	2.04898	2.91112	7.1786	0.535361	0.848568	up	no	1.81394	0.00482596	up	yes	conserved hypothetical protein
AFLA_064250	10.2897	5.04631	25.3032	-1.02667	0.270335	down	no	1.27587	0.0247577	up	yes	phenol 2-monooxygenase, putative
AFLA_064270	4.19424	2.19211	37.8957	-1.00317	0.652239	down	no	3.04525	0.000708053	up	yes	gibberellin 2-oxidase, putative
AFLA_064280	0.965119	0.232413	7.36851	-2.09515	0.269791	down	no	2.83874	2.33e-05	up	yes	N-methyltransferase, putative
AFLA_064320	11.0394	9.82945	28.3757	-0.161388	0.977758	down	no	1.33765	0.00361314	up	yes	oligopeptide transporter, putative
AFLA_064360	0.814679	0.237763	0.265357	-1.82335	0.0709793	down	no	-1.69101	0.00884336	down	yes	ABC multidrug transporter, putative
AFLA_064610	60.6559	24.9845	12.3998	-1.2831	0.626185	down	no	-2.25331	8e-07	down	yes	short-chain oxidoreductase, putative
AFLA_064630	0.649748	0.115535	0.181994	-2.46947	0.0696713	down	no	-1.81442	0.0382863	down	yes	hypothetical protein
AFLA_064640	10.3629	5.49454	5.06061	-0.908049	0.361212	down	no	-1.04301	0.0470366	down	yes	oxidoreductase, short-chain dehydrogenase/reductase family
AFLA_064660	4.04598	9.20304	13.6114	1.18271	0.224124	up	no	1.69107	0.000256083	up	yes	conserved hypothetical protein
AFLA_064810	138.281	239.307	296.523	0.80959	0.289082	up	no	1.09874	6.48e-05	up	yes	extracellular proline-serine rich protein
AFLA_064840	15.9363	6.23475	1.48744	-1.34142	0.0890823	down	no	-3.43324	3.88e-13	down	yes	conserved hypothetical protein
AFLA_064900	11134.6	28266.6	31094.7	1.34735	0.248936	up	no	1.4555	0.000227166	up	yes	hypothetical protein
AFLA_065120	1.10355	0.282918	0.220684	-2.03577	0.0850951	down	no	-2.35217	0.000559588	down	yes	alpha-L-rhamnosidase C, putative
AFLA_065200	1.49865	3.67016	9.24556	1.22962	0.387691	up	no	2.56535	0.000504848	up	yes	conserved hypothetical protein
AFLA_065450	2.12525	0.920982	26.4812	-1.20703	0.323732	down	no	3.58029	2.4e-11	up	yes	penicillolysin/deuterolysin metalloprotease, putative
AFLA_065550	11.4045	19.4978	25.2485	0.815775	0.591748	up	no	1.17808	0.0149707	up	yes	MFS transporter, putative
AFLA_065560	5.18215	8.57819	12.1594	0.774806	0.575117	up	no	1.26127	0.0344874	up	yes	conserved hypothetical protein
AFLA_065580	0.483444	0.798444	1.54391	0.772025	0.768502	up	no	1.67538	0.0343238	up	yes	conserved hypothetical protein
AFLA_065960	17.1449	40.1173	5.39237	1.18467	0.0501604	up	no	-1.74113	0.00028027	down	yes	fucose-specific lectin FleA
AFLA_066270	173.419	80.2597	83.6108	-1.13051	0.183694	down	no	-1.05029	3.58e-06	down	yes	RNA-binding La domain protein
AFLA_066330	551.855	579.761	264.204	0.0277299	1	up	no	-1.11617	2.88e-05	down	yes	oleate delta-12 desaturase
AFLA_066380	1.27174	3.0707	5.09006	1.26653	0.243805	up	no	1.9592	0.00155554	up	yes	nf kappa B inhibitor I-kappa-B, putative
AFLA_066420	6.48041	3.43847	3.00343	-0.933334	0.317055	down	no	-1.11287	0.0116394	down	yes	MSF oligopeptide transporter, putative
AFLA_066480	15.9884	6.75544	6.36864	-1.3231	0.243388	down	no	-1.37881	0.000195249	down	yes	conserved hypothetical protein
AFLA_066500	1.95788	1.06692	0.58817	-1.00842	0.728781	down	no	-1.82581	0.0175608	down	yes	gibberellin 20-oxidase, putative
AFLA_066510	3.53679	1.65041	1.2427	-1.09284	0.269791	down	no	-1.51372	0.00562967	down	yes	D-lactate dehydrogenase, putative
AFLA_066520	5.00006	1.65183	1.85695	-1.62359	0.295948	down	no	-1.45665	0.0308343	down	yes	hypothetical protein
AFLA_066870	18.548	10.6061	8.70227	-0.802498	0.391216	down	no	-1.08804	0.025967	down	yes	conserved hypothetical protein
AFLA_066880	2.88826	0.853066	0.915007	-1.84923	0.0949829	down	no	-1.76261	0.0053476	down	yes	monocarboxylate transporter, putative
AFLA_066890	4.8847	1.43576	1.53223	-1.8612	0.0600457	down	no	-1.79985	0.00673162	down	yes	cytochrome P450, putative
AFLA_066940	2.51781	2.7132	0.966413	0.0701965	1	up	no	-1.43486	0.0283793	down	yes	O-methyltransferase, putative
AFLA_066950	49.6353	25.9532	3.71254	-1.10194	0.607903	down	no	-3.88294	2.88e-43	down	yes	conserved hypothetical protein
AFLA_067040	14.9322	11.8219	7.25479	-0.283103	0.907926	down	no	-1.03169	0.0050111	down	yes	GABA permease, putative
AFLA_067100	3295.2	2883.73	1746.86	-0.311833	0.882327	down	no	-1.04471	2.08e-05	down	yes	mitochondrial hypoxia responsive domain protein
AFLA_067470	12.5266	7.90782	6.56901	-0.714328	0.499951	down	no	-1.00019	0.0180569	down	yes	acyl-CoA thioesterase
AFLA_067640	196.159	184.088	97.8589	-0.168377	0.944247	down	no	-1.07279	1.13e-06	down	yes	alternative NADH-dehydrogenase
AFLA_067650	21.5335	5.92417	9.54887	-2.02073	0.429342	down	no	-1.28671	9.36e-05	down	yes	beta-carotene dioxygenase, putative
AFLA_067760	10.714	5.27936	3.39634	-1.08698	0.357993	down	no	-1.7578	0.0010336	down	yes	conserved histidine-rich protein
AFLA_067840	4.83382	1.99441	1.06325	-1.24978	0.182727	down	no	-2.15273	1.74e-05	down	yes	MFS sugar transporter, putative
AFLA_067860	42.335	102.007	209.004	1.32788	0.372175	up	no	2.3156	3.52e-09	up	yes	tyrosinase, putative
AFLA_067890	6.48168	9.44917	17.1005	0.562996	0.662294	up	no	1.41128	0.000211217	up	yes	dimethylaniline monooxygenase, putative
AFLA_068030	5.29909	9.22683	15.0688	0.79384	0.377741	up	no	1.49445	0.000292355	up	yes	ankyrin repeat-containing protein, putative
AFLA_068060	10.1383	5.1915	4.94014	-0.955385	0.25988	down	no	-1.02225	0.00585904	down	yes	conserved hypothetical protein
AFLA_068140	4.59642	9.70258	17.3537	1.07334	0.34644	up	no	1.92968	8.8e-06	up	yes	MFS quinate transporter QutD
AFLA_068160	1.32588	3.35682	6.7947	1.27693	0.415759	up	no	2.25086	0.000992085	up	yes	4-hydroxyphenylpyruvate dioxygenase, putative
AFLA_068170	0.577019	0.470522	1.53424	-0.298568	0.923424	down	no	1.41885	0.0350715	up	yes	ankyrin repeat-containing protein, putative
AFLA_068230	12.7059	9.36036	3.45367	-0.448838	0.815408	down	no	-1.87112	0.0111912	down	yes	hypothetical protein
AFLA_068380	1.46629	1.01488	0.314786	-0.656434	0.878628	down	no	-2.28645	0.00266038	down	yes	DNA mismatch repair protein Msh5
AFLA_068390	79.6231	37.7385	36.4991	-1.09804	0.438319	down	no	-1.10613	2.26e-06	down	yes	Sas10/Utp3 family protein
AFLA_068530	114.198	42.9654	40.5126	-1.43521	0.200719	down	no	-1.4823	5.02e-10	down	yes	ribosomal RNA processing protein, putative
AFLA_068600	16.9808	6.90398	69.3695	-1.2997	0.0731244	down	no	1.98017	0.000121785	up	yes	ammonium transporter MepA
AFLA_068610	20.9531	31.9632	68.6613	0.550043	0.716547	up	no	1.61277	0.00509262	up	yes	conserved hypothetical protein
AFLA_068780	4.15629	5.47777	9.31599	0.391848	0.78759	up	no	1.14669	0.00537214	up	yes	conserved hypothetical protein
AFLA_068840	27.5625	67.4306	123.474	1.31933	0.227206	up	no	2.16608	2.02e-10	up	yes	glycine cleavage system T protein
AFLA_068870	68.2525	38.7095	29.9677	-0.849522	0.45683	down	no	-1.18189	6.19e-08	down	yes	CCAAT-box-binding transcription factor
AFLA_068890	14.5269	17.5482	94.9492	0.278132	0.863822	up	no	2.68111	1.02e-13	up	yes	mutt/nudix hydrolase, putative
AFLA_068940	23.3528	19.3841	49.0663	-0.313292	0.86511	down	no	1.01214	0.00448976	up	yes	proteasome regulatory particle subunit (Nas6), putative
AFLA_069030	357.496	180.035	183.958	-1.02932	0.133946	down	no	-1.00682	8.64e-06	down	yes	conserved hypothetical protein
AFLA_069050	69.0786	45.0065	29.9365	-0.774909	0.863822	down	no	-1.31126	0.000851102	down	yes	conserved hypothetical protein
AFLA_069060	19.8507	9.11843	4.14918	-1.25802	0.598862	down	no	-2.33562	1.18e-05	down	yes	hypothetical protein
AFLA_069110	28.1173	64.1483	61.1003	1.19025	0.0585279	up	no	1.08519	0.00151383	up	yes	glycerol-3-phosphate phosphatase (GppA), putative
AFLA_069120	128.911	51.6364	42.3313	-1.34546	0.211225	down	no	-1.59593	9.45e-14	down	yes	GTP binding protein, putative
AFLA_069270	131.775	47.2763	38.0318	-1.50837	0.333555	down	no	-1.7704	6.69e-17	down	yes	protein PUF6, putative
AFLA_069600	5.46815	1.51953	1.42793	-1.97351	0.136999	down	no	-2.0588	0.00852857	down	yes	conserved hypothetical protein
AFLA_069620	660.855	196.955	33.5583	-1.87725	0.0629034	down	no	-4.44202	0.0224519	down	yes	conserved hypothetical protein
AFLA_069640	3.85599	2.41845	1.4859	-0.738275	0.634543	down	no	-1.45297	0.0306959	down	yes	hypothetical protein
AFLA_069680	5.67731	7.53169	14.0497	0.388859	0.765518	up	no	1.26336	0.00612956	up	yes	3-oxoacyl-(acyl-carrier-protein) reductase
AFLA_069920	333.607	140.838	153.195	-1.27095	0.16656	down	no	-1.124	1.66e-07	down	yes	GTP-binding protein YchF
AFLA_070020	4.70819	6.57042	2.28251	0.426822	0.796112	up	no	-1.07587	0.0367781	down	yes	alpha-L-arabinofuranosidase
AFLA_070100	327.608	143.337	72.154	-1.25141	0.442241	down	no	-2.17608	2.56e-25	down	yes	importin beta-4 subunit, putative
AFLA_070130	5.32337	8.79672	43.7643	0.615767	0.772225	up	no	2.94753	1.22e-10	up	yes	MFS multidrug transporter, putative
AFLA_070230	79.2179	37.0185	24.688	-1.06741	0.218865	down	no	-1.66154	3.53e-06	down	yes	hypothetical protein
AFLA_070250	24.9105	20.4106	73.5459	-0.292459	0.864048	down	no	1.53392	2.49e-06	up	yes	conserved hypothetical protein
AFLA_070280	1.34137	0.279277	0.357768	-2.30159	0.144255	down	no	-1.90673	0.0364343	down	yes	conserved hypothetical protein
AFLA_070340	4.83267	5.08282	9.70916	0.0700406	1	up	no	1.00568	0.0374674	up	yes	F-box domain protein
AFLA_070400	0.469705	0.26375	0.0753263	-0.881911	0.716439	down	no	-2.72475	0.0080181	down	yes	conserved hypothetical protein
AFLA_070440	16.035	11.3294	6.29437	-0.533185	0.693709	down	no	-1.41142	0.00248198	down	yes	hypothetical protein
AFLA_070460	0.469513	0.285616	0	-0.768577	0.882327	down	no	#NAME?	0.0257576	down	yes	pectate lyase precursor, putative
AFLA_070490	18.5462	17.0043	95.8526	-0.212801	1	down	no	2.23436	0.0010418	up	yes	conserved hypothetical protein
AFLA_070540	28.4969	41.8321	60.9795	0.535721	0.586259	up	no	1.07466	0.00262264	up	yes	conserved hypothetical protein
AFLA_070590	3.76216	6.6171	8.14209	0.834466	0.377189	up	no	1.09991	0.0404809	up	yes	alanyl-tRNA synthetase, putative
AFLA_070640	0.603027	2.0433	2.39311	1.7123	0.186872	up	no	1.94035	0.0178975	up	yes	conserved hypothetical protein
AFLA_070670	30.7104	37.3142	69.841	0.259142	0.906461	up	no	1.16481	0.00664806	up	yes	hypothetical protein
AFLA_070680	25.3637	26.0283	68.3996	0.0427353	1	up	no	1.42548	0.00286453	up	yes	molybdopterin synthase small subunit CnxG
AFLA_070690	28.0102	44.0293	68.0839	0.658868	0.41335	up	no	1.26831	2.54e-05	up	yes	cystathionine gamma-synthase
AFLA_070770	33.2881	16.9599	15.5506	-1.05175	0.259267	down	no	-1.16097	4.35e-05	down	yes	conserved hypothetical protein
AFLA_070810	15.5091	7.91282	6.1743	-0.988663	0.16136	down	no	-1.35044	0.0201724	down	yes	cholinesterase, putative
AFLA_070820	106.185	81.4463	54.9339	-0.448289	0.704416	down	no	-1.02024	0.00158922	down	yes	3-hydroxymethyl-3-methylglutaryl-Coenzyme A lyase, putative
AFLA_070880	4.40739	0.410702	0.225099	-3.43332	0.226416	down	no	-4.25223	0.000154122	down	yes	acyl-coenzyme A:Isopenicillin N acyltransferase PenDE
AFLA_070940	2.0674	1.36534	0.607112	-0.722327	0.815734	down	no	-1.85482	0.0282912	down	yes	extracellular rhamnogalacturonase, putative
AFLA_070990	330.216	734.472	964.552	1.14785	0.198197	up	no	1.50156	1.71e-05	up	yes	UTP-glucose-1-phosphate uridylyltransferase Ugp1, putative
AFLA_071150	12.2983	7.83566	5.93174	-0.66202	0.516027	down	no	-1.07321	0.00901486	down	yes	alcohol dehydrogenase, putative
AFLA_071240	70.0849	28.5952	28.0842	-1.31212	0.269791	down	no	-1.30655	4.14e-06	down	yes	RNA polymerase I subunit Rpa43, putative
AFLA_071350	160.207	399.148	483.272	1.31649	0.0904098	up	no	1.54594	3.88e-08	up	yes	UDP-N-acetylglucosamine pyrophosphorylase
AFLA_071360	510.304	222.305	249.732	-1.21621	0.0600457	down	no	-1.03718	1.74e-06	down	yes	zinc knuckle nucleic acid binding protein, putative
AFLA_071370	27.403	22.0784	5.45609	-0.380407	0.86511	down	no	-2.32469	1.87e-12	down	yes	meiotic recombination protein (Dmc1), putative
AFLA_071400	4.43152	6.10545	0.870097	0.38155	0.852113	up	no	-2.33984	7.95e-05	down	yes	conserved hypothetical protein
AFLA_071480	133.845	59.873	57.2007	-1.17665	0.153183	down	no	-1.22072	3.17e-08	down	yes	conserved hypothetical protein
AFLA_071490	19.9247	15.5962	5.9891	-0.374781	0.869082	down	no	-1.71194	2.46e-05	down	yes	conserved hypothetical protein
AFLA_071550	19.7049	9.33538	8.46325	-1.13317	0.309457	down	no	-1.26761	0.0324265	down	yes	conserved hypothetical protein
AFLA_071570	21.083	36.87	47.9026	0.77073	0.264219	up	no	1.1267	0.000214451	up	yes	malate dehydrogenase, putative
AFLA_071590	199.883	392.712	517.938	0.960165	0.152932	up	no	1.34445	1.25e-06	up	yes	hypothetical protein
AFLA_071660	20.8161	27.8466	45.2707	0.382627	0.764043	up	no	1.08488	0.00201682	up	yes	xylitol dehydrogenase
AFLA_072150	0.222688	0.544408	5.26658	1.23925	0.7312	up	no	4.56033	1.62e-09	up	yes	cytochrome P450, putative
AFLA_072160	0.470911	0.710031	2.44965	0.52744	0.852673	up	no	2.29972	0.00182855	up	yes	conserved hypothetical protein
AFLA_072500	4.65554	2.41022	2.15868	-0.974235	0.355355	down	no	-1.10539	0.0179794	down	yes	conserved hypothetical protein
AFLA_072550	11.1713	11.3733	2.12835	-0.018258	1	down	no	-2.37465	0.000199433	down	yes	dimethylaniline monooxygenase, putative
AFLA_072560	39.0227	27.9608	11.1522	-0.513251	0.711446	down	no	-1.80209	3.76e-07	down	yes	5-oxoprolinase, putative
AFLA_072570	250.412	186.711	121.904	-0.40719	0.716439	down	no	-1.03776	1.56e-06	down	yes	conserved hypothetical protein
AFLA_072670	21.6792	13.1299	1.84213	-0.819694	0.623102	down	no	-3.57973	3.67e-13	down	yes	zinc-iron transporter, putative
AFLA_072680	4596.25	3394.82	735.109	-0.53734	0.863822	down	no	-2.70239	8.74e-09	down	yes	hypothetical protein
AFLA_072800	12.3614	19.4615	31.4861	0.646359	0.546862	up	no	1.29747	0.00776416	up	yes	conserved hypothetical protein
AFLA_072810	4.04253	6.59678	9.76213	0.728553	0.50558	up	no	1.26083	0.0158514	up	yes	conserved hypothetical protein
AFLA_072910	1.29799	1.24929	0.37644	-0.108835	1	down	no	-1.74449	0.034042	down	yes	conserved hypothetical protein
AFLA_072920	35.1126	13.7607	13.1135	-1.364	0.309457	down	no	-1.396	9.27e-07	down	yes	amino acid transporter, putative
AFLA_072970	8.84927	7.73921	3.01622	-0.185976	0.98266	down	no	-1.56398	0.0111318	down	yes	hypothetical protein
AFLA_073030	8.03217	8.15214	1.97509	0.0210074	1	up	no	-2.00701	2.84e-06	down	yes	amino acid transporter, putative
AFLA_073090	2.77607	0.82834	0.815811	-1.77354	0.0958253	down	no	-1.78842	0.0112773	down	yes	conserved hypothetical protein
AFLA_073180	898.702	411.252	222.774	-1.06418	0.408758	down	no	-1.98516	4.58e-06	down	yes	MFS monosaccharide transporter, putative
AFLA_073220	11.4496	13.2088	4.70503	0.137942	0.974879	up	no	-1.37549	0.0185797	down	yes	hypothetical protein
AFLA_073240	50.1322	29.4266	24.6472	-0.839809	0.469752	down	no	-1.13274	0.00045994	down	yes	conserved hypothetical protein
AFLA_073260	48.6667	24.8802	21.897	-0.944937	0.22063	down	no	-1.15186	7.03e-06	down	yes	hexokinase, putative
AFLA_073350	22.1868	35.3574	45.2408	0.69424	0.38193	up	no	1.02372	0.000960266	up	yes	protein kinase C substrate, putative
AFLA_073480	673.453	700.279	1442.07	0.0544329	1	up	no	1.0709	9.79e-05	up	yes	tropomyosin, putative
AFLA_073610	6.19664	11.685	16.0277	0.902075	0.281671	up	no	1.31127	0.00537214	up	yes	conserved hypothetical protein
AFLA_073640	2.22444	1.53426	1.0093	-0.517396	0.696302	down	no	-1.13835	0.0354353	down	yes	C6 transcription factor, putative
AFLA_073650	5.17044	2.0754	1.94933	-1.26368	0.291906	down	no	-1.39348	0.0182798	down	yes	mandelate racemase/muconate lactonizing enzyme family protein
AFLA_073680	27.1184	17.7327	14.079	-0.721142	0.517623	down	no	-1.05561	0.00207649	down	yes	alcohol dehydrogenase, putative
AFLA_073720	280.651	107.98	111.878	-1.39742	0.0932891	down	no	-1.32066	1.7e-09	down	yes	ribosome biogenesis protein (Rrs1), putative
AFLA_073780	516.432	470.479	267.593	-0.225572	0.937985	down	no	-1.0519	0.0325854	down	yes	conserved hypothetical protein
AFLA_073840	29.2066	25.455	62.8909	-0.24977	0.866711	down	no	1.0554	0.000109832	up	yes	Na/K ATPase alpha 1 subunit, putative
AFLA_073900	0.28129	0.539117	1.88454	0.919776	0.662073	up	no	2.69512	0.000383504	up	yes	histidinol dehydrogenase, putative
AFLA_073960	9.5897	12.0389	21.8533	0.304043	0.846994	up	no	1.15511	0.00452677	up	yes	conserved hypothetical protein
AFLA_074030	2.86943	6.43964	7.75937	1.18232	0.315625	up	no	1.4343	0.0378921	up	yes	hypothetical protein
AFLA_074070	65.6549	11.7054	10.2371	-2.5292	0.108792	down	no	-2.67185	5.94e-23	down	yes	siderochrome-iron transporter, putative
AFLA_074150	20.4478	7.51172	6.61779	-1.42074	0.0703404	down	no	-1.59345	4.14e-06	down	yes	conserved hypothetical protein
AFLA_074250	0.402096	0.727766	1.61177	0.812982	0.737778	up	no	1.9965	0.00630588	up	yes	polygalacturonase precursor, putative
AFLA_074270	2.06351	3.52997	6.94821	0.669576	0.694217	up	no	1.66136	0.00286074	up	yes	sugar transporter, putative
AFLA_074500	0.431379	0.149775	0.072167	-1.53567	0.476255	down	no	-2.60443	0.0465061	down	yes	short chain type dehydrogenase, putative
AFLA_074610	1.3426	0.700314	0.464084	-0.945115	0.445661	down	no	-1.52034	0.0336365	down	yes	MFS transporter, putative
AFLA_074620	25.5053	25.7091	3.01228	0.0835167	1	up	no	-3.04627	2.24e-09	down	yes	sodium/phosphate symporter, putative
AFLA_074700	7.69838	6.36937	3.69965	-0.305987	0.848568	down	no	-1.06708	0.00500729	down	yes	conserved hypothetical protein
AFLA_074820	1.46979	3.20699	4.14578	1.11145	0.207089	up	no	1.4586	0.00367938	up	yes	conserved hypothetical protein
AFLA_074870	5.64665	2.8383	2.56853	-0.996367	0.281971	down	no	-1.16974	0.0123903	down	yes	hypothetical protein
AFLA_074890	3.3585	4.70557	7.87856	0.463949	0.742246	up	no	1.18588	0.0232851	up	yes	thiamin pyrophosphokinase, putative
AFLA_074930	0.420557	2.76156	6.0752	2.70108	0.101377	up	no	3.79024	0.000143451	up	yes	conserved hypothetical protein
AFLA_075100	467.212	429.149	165.382	-0.186292	0.970509	down	no	-1.59413	0.0033075	down	yes	conserved hypothetical protein
AFLA_075120	128.352	92.0152	64.3942	-0.503058	0.618942	down	no	-1.02672	3.58e-06	down	yes	mitochondrial carrier protein, putative
AFLA_075170	1.6761	0.888159	0.281644	-1.0471	0.680493	down	no	-2.65129	6.63e-05	down	yes	alkaline phosphatase, putative
AFLA_075230	19.3498	55.9303	59.7591	1.49394	0.259267	up	no	1.53383	0.00023921	up	yes	chromatin regulatory protein sir2, putative
AFLA_075390	5.51691	13.5453	16.7568	1.19145	0.377189	up	no	1.52193	0.00348411	up	yes	3-methyl-2-oxobutanoate hydroxymethyltransferase, putative
AFLA_075420	2.70983	1.60788	1.16436	-0.750178	0.514558	down	no	-1.20242	0.0327517	down	yes	homeobox protein meis, putative
AFLA_075430	55.1164	11.8351	7.34781	-2.25908	0.265587	down	no	-2.88035	3.15e-30	down	yes	DEAD box ATP-dependent RNA helicase, putative
AFLA_075470	2.09285	1.04077	0.789498	-1.04318	0.305429	down	no	-1.43564	0.0122293	down	yes	conserved hypothetical protein
AFLA_075480	0.231457	0.242949	3.47299	0.115357	1	up	no	3.91862	4.18e-10	up	yes	conserved hypothetical protein
AFLA_075500	101.025	47.1819	37.1439	-1.10757	0.0852085	down	no	-1.45923	2.57e-10	down	yes	conserved hypothetical protein
AFLA_075760	1.24451	1.31098	3.32494	0.0176127	1	up	no	1.36693	0.00748339	up	yes	conserved hypothetical protein
AFLA_075770	1.78403	1.74149	4.63772	-0.0849219	1	down	no	1.30647	0.0354353	up	yes	dienelactone hydrolase family protein
AFLA_075800	0.811609	1.45845	5.73288	0.788969	0.54158	up	no	2.7526	1.24e-07	up	yes	conserved hypothetical protein
AFLA_075830	86.1099	25.9635	24.5298	-1.74488	0.187745	down	no	-1.78951	2.24e-13	down	yes	dimethyladenosine transferase
AFLA_075880	19.556	58.8287	47.1596	1.5411	0.114995	up	no	1.17956	0.000743635	up	yes	conserved hypothetical protein
AFLA_075960	1.08329	0.546379	0.1704	-1.05138	0.681631	down	no	-2.7338	0.0348965	down	yes	conserved hypothetical protein
AFLA_076010	0.629287	1.04176	3.74945	0.745606	0.557941	up	no	2.56455	3.56e-08	up	yes	zinc finger protein, putative
AFLA_076020	11.2954	9.31718	33.6769	-0.276546	0.935434	down	no	1.54663	0.00107675	up	yes	Tropomyosin-1, putative
AFLA_076170	14.6397	5.70731	0.155405	-1.50225	0.118978	down	no	-6.75558	0.034042	down	yes	conserved hypothetical protein
AFLA_076180	4.61287	1.4886	0	-1.78843	0.137148	down	no	#NAME?	4.73e-12	down	yes	conserved hypothetical protein
AFLA_076190	2.87971	0.296274	0.25231	-3.4599	0.0949829	down	no	-3.67032	0.0110048	down	yes	hypothetical protein
AFLA_076240	4.33849	3.04856	1.60545	-0.51435	0.676516	down	no	-1.42992	0.00612227	down	yes	glutamate-1-semialdehyde 2,1-aminomutase, putative
AFLA_076290	1.83734	0.385351	0.76867	-2.29079	0.0773268	down	no	-1.24983	0.0391154	down	yes	capsule associated protein, putative
AFLA_076430	417.199	1011.2	927.935	1.26287	0.0990346	up	no	1.12037	8.65e-05	up	yes	SUN domain protein (Uth1), putative
AFLA_076440	205.985	90.4682	63.0216	-1.21019	0.355355	down	no	-1.69218	1.98e-15	down	yes	conserved hypothetical protein
AFLA_076470	99.1431	37.8012	48.6405	-1.43838	0.0916653	down	no	-1.11486	0.00038986	down	yes	conserved hypothetical protein
AFLA_076500	11.8198	7.69727	5.24724	-0.637463	0.702969	down	no	-1.15449	0.00100671	down	yes	conserved hypothetical protein
AFLA_076540	2.30775	3.71782	7.0067	0.627212	0.628679	up	no	1.55456	0.00104105	up	yes	cytochrome P450, putative
AFLA_076600	1048.52	916.662	525.8	-0.240456	0.959149	down	no	-1.00564	0.000407633	down	yes	translation elongation factor eEF-3, putative
AFLA_076610	16.9537	8.00272	7.49454	-1.09855	0.435427	down	no	-1.15521	6.63e-05	down	yes	TPR domain protein
AFLA_076630	110.275	43.7209	50.3622	-1.36226	0.23565	down	no	-1.12336	9.87e-07	down	yes	ribose phosphate diphosphokinase Prs1, putative
AFLA_076780	179.413	74.6229	59.6922	-1.27443	0.164408	down	no	-1.57767	1.28e-12	down	yes	ribonucleoprotein, putative
AFLA_076810	2.9089	1.62744	1.14925	-0.886997	0.535162	down	no	-1.35657	0.0074407	down	yes	conserved hypothetical protein
AFLA_076820	6.153	7.60646	14.8277	0.242888	0.911239	up	no	1.23491	0.00153291	up	yes	glucose oxidase, putative
AFLA_077070	12.3973	12.981	5.22895	0.0233993	1	up	no	-1.2982	0.00579586	down	yes	hypothetical protein
AFLA_077080	6.59649	6.56133	2.58197	-0.0201885	1	down	no	-1.36468	0.00128375	down	yes	conserved hypothetical protein
AFLA_077170	5.6454	4.11934	1.50548	-0.497642	0.96041	down	no	-2.00138	2.13e-05	down	yes	hypothetical protein
AFLA_077180	2.99472	2.88544	0.329491	-0.0981285	1	down	no	-3.25975	0.000960266	down	yes	hypothetical protein
AFLA_077250	57.6564	37.1401	21.0161	-0.609063	0.514907	down	no	-1.45728	0.000434502	down	yes	fatty-acyl coenzyme A oxidase (Pox1), putative
AFLA_077260	13.8385	8.76256	5.14358	-0.687567	0.505105	down	no	-1.46288	0.0256768	down	yes	aldo-keto reductase (YakC), putative
AFLA_077410	6.11645	3.2902	1.77479	-0.941436	0.380007	down	no	-1.84842	9.54e-05	down	yes	acyl-CoA dehydrogenase, putative
AFLA_077420	2.64136	1.36626	0.721665	-1.02034	0.454756	down	no	-1.95577	0.00279702	down	yes	CAIB/BAIF family enzyme
AFLA_077460	0.570457	1.66473	4.90828	1.56839	0.0569321	up	no	3.10442	6.3e-11	up	yes	ankyrin, putative
AFLA_077540	80.9543	50.7982	31.6433	-0.726531	0.528684	down	no	-1.43223	0.000732614	down	yes	hypothetical protein
AFLA_077550	63.7998	44.7108	29.7247	-0.570847	0.657203	down	no	-1.177	0.00284108	down	yes	hypothetical protein
AFLA_077560	154.337	77.087	61.4447	-1.01985	0.118978	down	no	-1.34319	3.91e-10	down	yes	choline transport protein, putative
AFLA_077590	8.41156	16.6406	21.6361	0.94844	0.250625	up	no	1.33992	0.013997	up	yes	conserved hypothetical protein
AFLA_077760	1.60385	1.11491	0.197995	-0.635642	0.90573	down	no	-3.18003	0.0464774	down	yes	conserved hypothetical protein
AFLA_077770	2.2601	1.11558	0.606941	-1.09809	0.411363	down	no	-1.99261	0.00182493	down	yes	hypothetical protein
AFLA_077850	14.6346	9.62142	6.38127	-0.626369	0.483682	down	no	-1.21668	0.000332794	down	yes	phenylalanine ammonia-lyase, putative
AFLA_077870	792.074	153.772	96.9966	-2.48496	0.0902327	down	no	-3.10979	4.14e-55	down	yes	conserved hypothetical protein
AFLA_078000	25.875	15.2159	8.58602	-0.739039	0.555509	down	no	-1.56077	0.00115019	down	yes	conserved hypothetical protein
AFLA_078130	0.529745	2.09847	4.46338	1.87726	0.278177	up	no	2.92797	0.00149004	up	yes	mannan endo-1,6-alpha-mannosidase DCW1 precursor, putative
AFLA_078230	20.8448	48.5496	68.7956	1.23921	0.0669606	up	no	1.70616	5.27e-07	up	yes	acetyltransferase, GNAT family
AFLA_078250	12.1327	5.90682	5.34988	-1.03498	0.162521	down	no	-1.17319	0.00302512	down	yes	serine/threonine protein kinase, putative
AFLA_078370	65.2057	21.2775	9.99222	-1.59293	0.368342	down	no	-2.65481	6.04e-20	down	yes	oxidoreductase, short chain dehydrogenase/reductase family
AFLA_078530	36.431	19.4705	15.5944	-0.914662	0.346011	down	no	-1.21605	8.7e-06	down	yes	ribosome biogenesis protein Noc4, putative
AFLA_078550	6.79548	6.96535	2.85581	-0.00178323	1	down	no	-1.27031	0.0464142	down	yes	conserved hypothetical protein
AFLA_078570	4.36023	4.3998	1.74872	-0.0401262	1	down	no	-1.35022	0.000362769	down	yes	conserved hypothetical protein
AFLA_078820	338.081	234.52	127.196	-0.617645	0.637761	down	no	-1.52689	2.85e-12	down	yes	conserved hypothetical protein
AFLA_078850	3.59125	1.70156	0.845106	-1.09422	0.274846	down	no	-2.08611	0.000107208	down	yes	neutral amino acid permease
AFLA_078990	68.695	35.6185	29.1235	-0.999179	0.200884	down	no	-1.31248	5.03e-08	down	yes	choline transporter Hnm1, putative
AFLA_079220	4.00187	1.49563	0.463707	-1.42844	0.138298	down	no	-3.13526	4.55e-07	down	yes	glucose dehydrogenase, putative
AFLA_079380	1.39023	1.03657	3.30363	-0.436859	0.803478	down	no	1.21829	0.0122201	up	yes	NRPS-like enzyme, putative
AFLA_079400	40.8631	18.4229	18.0339	-1.16114	0.334751	down	no	-1.16488	8.15e-07	down	yes	NRPS-like enzyme, putative
AFLA_079410	9.19159	4.21444	3.97889	-1.12065	0.162521	down	no	-1.20495	0.0391554	down	yes	MFS transporter, putative
AFLA_079680	29.6313	64.9901	60.6825	1.14007	0.0731244	up	no	1.0209	0.000359266	up	yes	vesicular fusion ATPase, putative
AFLA_079700	106.906	25.4033	24.2181	-2.09092	0.300468	down	no	-2.10567	1.53e-21	down	yes	protein arginine methyltransferase RmtB
AFLA_080000	3.24812	3.41294	1.11539	0.0547334	1	up	no	-1.51203	0.020323	down	yes	DnaJ domain protein
AFLA_080010	7.84579	7.14259	1.8485	-0.141608	1	down	no	-2.05064	0.0103954	down	yes	hypothetical protein
AFLA_080110	16.3449	34.9566	43.1789	1.07868	0.123858	up	no	1.37544	0.000224864	up	yes	adenylate kinase 2
AFLA_080150	147.773	57.8564	32.7508	-1.39813	0.315625	down	no	-2.16392	2.86e-10	down	yes	hypothetical protein
AFLA_080310	36.2696	26.4152	17.0418	-0.43005	0.73637	down	no	-1.08258	0.0148573	down	yes	hypothetical protein
AFLA_080390	155.919	187.875	351.034	0.211019	0.883676	up	no	1.09913	0.000125165	up	yes	6-phosphogluconolactonase, putative
AFLA_080440	18.4855	7.1088	5.14936	-1.39601	0.563738	down	no	-1.8051	5.03e-08	down	yes	MYND domain protein, putative
AFLA_080740	38.3297	20.2194	16.4305	-0.952874	0.435022	down	no	-1.21312	5.13e-07	down	yes	small nucleolar ribonucleoprotein complex subunit Dip2, putative
AFLA_080790	23.5792	28.015	103.8	0.154418	0.985465	up	no	2.02752	7.62e-09	up	yes	TPR domain protein
AFLA_080830	104.086	45.0276	37.2387	-1.23727	0.262944	down	no	-1.47425	9.06e-10	down	yes	rRNA processing protein, putative
AFLA_080850	62.7556	26.2597	22.4785	-1.29052	0.506771	down	no	-1.45534	2.8e-09	down	yes	rRNA processing protein Pwp1, putative
AFLA_080870	67.9955	37.1957	28.1921	-0.909671	0.515218	down	no	-1.26222	5.82e-08	down	yes	RNA polymerase I specific transcription initiation factor RRN3
AFLA_081080	1.64445	5.89745	6.54091	1.8954	0.0888336	up	no	2.00726	0.00925189	up	yes	hypothetical protein
AFLA_081110	141.271	273.383	462.142	0.811335	0.722636	up	no	1.58321	5.34e-07	up	yes	MFS transporter, putative
AFLA_081260	173.418	53.2198	69.3264	-1.71553	0.0694408	down	no	-1.3068	3.36e-09	down	yes	60S ribosome biogenesis protein Brx1, putative
AFLA_081340	32.383	71.883	72.0795	1.08886	0.227313	up	no	1.06471	0.000293397	up	yes	glycogen debranching enzyme Gdb1, putative
AFLA_081420	29.0751	62.5448	65.3207	1.05322	0.361648	up	no	1.0706	0.0397057	up	yes	extracellular SCP domain protein Pry1, putative
AFLA_081430	259.219	115.544	92.7662	-1.17987	0.111922	down	no	-1.48178	4.87e-13	down	yes	eukaryotic translation initiation factor 3 subunit EifCb, putative
AFLA_081470	57.4538	18.7381	20.6678	-1.62012	0.153866	down	no	-1.4497	8.37e-09	down	yes	ribosome biogenesis protein Rsa4, putative
AFLA_081480	3213.44	5918.83	7469.92	0.856611	0.435022	up	no	1.15707	0.000442341	up	yes	IgE-binding protein
AFLA_081500	61.9752	40.3566	5.00787	-0.647217	0.922255	down	no	-3.57431	0.00270917	down	yes	conserved hypothetical protein
AFLA_081720	0.327276	0.726493	1.65025	1.07939	0.586723	up	no	2.22728	0.0237031	up	yes	conserved hypothetical protein
AFLA_081900	218.017	346.133	33.0861	0.642797	0.438891	up	no	-2.77329	9.21e-12	down	yes	hypothetical protein
AFLA_082000	58.2958	83.5451	164.845	0.530549	0.610412	up	no	1.49248	1.81e-05	up	yes	hypothetical protein
AFLA_082330	7.38954	10.8522	16.4045	0.581994	0.609481	up	no	1.16102	0.00537214	up	yes	phosphatidylinositol:UDP-GlcNAc transferase subunit PIG-A
AFLA_082680	35.9687	18.7474	13.6884	-0.966918	0.323597	down	no	-1.39338	1.56e-05	down	yes	conserved hypothetical protein
AFLA_082690	54.199	15.9376	15.726	-1.77708	0.189073	down	no	-1.7574	8.26e-14	down	yes	pseudouridine synthase TruD/Pus7, putative
AFLA_082730	1.48706	1.76967	3.39836	0.249316	0.928892	up	no	1.17735	0.027543	up	yes	conserved hypothetical protein
AFLA_082960	26.892	19.7809	1.70917	-0.47196	0.771254	down	no	-4.0554	1.62e-09	down	yes	conserved hypothetical protein
AFLA_083060	91.4755	112.406	209.247	0.198633	0.962388	up	no	1.08632	0.000877733	up	yes	heme/steroid binding domain protein, putative
AFLA_083160	11.2018	12.4405	23.8037	0.131955	0.992116	up	no	1.06622	0.000976833	up	yes	molybdopterin cofactor biosynthetic protein
AFLA_083180	93.0289	41.9432	29.7025	-1.17462	0.432481	down	no	-1.62598	5.38e-14	down	yes	ribosome assembly protein Noc2, putative
AFLA_083220	27.9763	10.0767	11.1793	-1.48032	0.243679	down	no	-1.29495	3.95e-05	down	yes	ATP dependent RNA helicase (Rok1), putative
AFLA_083250	0.583968	0.169041	3.12282	-1.82314	0.355551	down	no	2.32676	0.00158922	up	yes	dimethylallyl tryptophan synthase, putative
AFLA_083640	23.6307	51.3914	60.6132	1.1268	0.0980195	up	no	1.3211	1.69e-05	up	yes	3-isopropylmalate dehydrogenase Leu2A
AFLA_084020	35.47	19.3513	18.559	-0.944855	0.280787	down	no	-1.0203	0.000123196	down	yes	homeobox and C2H2 transcription factor, putative
AFLA_084390	13.2234	29.4391	29.5081	1.17623	0.0962938	up	no	1.14405	0.00125031	up	yes	conserved hypothetical protein
AFLA_084490	28.3611	43.4067	70.34	0.655426	0.516183	up	no	1.31817	3.04e-05	up	yes	conserved hypothetical protein
AFLA_084560	17.7444	8.49837	6.59316	-1.05501	0.290104	down	no	-1.42441	0.000631062	down	yes	pyridoxal reductase, putative
AFLA_084580	20.7294	7.27374	8.64356	-1.519	0.0775024	down	no	-1.24753	0.000107871	down	yes	mtDNA inheritance protein Dml1, putative
AFLA_084610	70.326	36.905	28.1871	-0.948525	0.291276	down	no	-1.31353	3.36e-09	down	yes	SDA1 domain protein
AFLA_084650	50.1037	67.2629	135.765	0.440289	0.671114	up	no	1.41537	1.94e-06	up	yes	palmitoyltransferase with autoacylation activity Pfa4, putative
AFLA_084670	77.6065	36.7107	31.3324	-1.12	0.391216	down	no	-1.2967	3.8e-09	down	yes	ATP-dependent RNA helicase (Drs1), putative
AFLA_084720	45.2112	21.318	10.3183	-1.20125	0.285797	down	no	-2.23773	9.62e-10	down	yes	C6 transcription factor, putative
AFLA_084910	22.2627	12.4189	10.1565	-0.865663	0.550752	down	no	-1.1166	0.00070564	down	yes	exosome complex exonuclease Rrp6, putative
AFLA_085140	604.954	253.482	167.097	-1.29228	0.229622	down	no	-1.86664	1.98e-12	down	yes	extracellular thaumatin domain protein, putative
AFLA_085160	5.84469	3.2124	2.35741	-0.853642	0.355835	down	no	-1.28868	0.000870917	down	yes	ABC efflux transporter, putative
AFLA_085280	317.272	154.572	122.24	-1.0537	0.137148	down	no	-1.37943	2.67e-11	down	yes	pre-rRNA processing nucleolar protein Sik1, putative
AFLA_085290	9.64262	16.3019	20.9621	0.768418	0.391216	up	no	1.12552	0.00584659	up	yes	conserved hypothetical protein
AFLA_085330	17.8431	14.2244	8.52601	-0.365349	0.825782	down	no	-1.11653	0.01683	down	yes	hypothetical protein
AFLA_085440	63.0747	25.6321	22.4257	-1.34148	0.312198	down	no	-1.47867	3.39e-09	down	yes	PDCD2_C domain protein, putative
AFLA_085480	32.1455	61.2784	72.2351	0.958844	0.302387	up	no	1.18821	0.000551064	up	yes	cell wall glucanase, putative
AFLA_085850	9.08823	10.5937	1.95688	0.270228	0.923413	up	no	-2.20136	1.45e-07	down	yes	conserved hypothetical protein
AFLA_086010	56.1783	30.6722	24.1705	-0.881045	0.254578	down	no	-1.24528	1.94e-05	down	yes	conserved hypothetical protein
AFLA_086120	1.3203	1.11676	14.2225	-0.123188	1	down	no	3.50131	0.000415736	up	yes	hypothetical protein
AFLA_086180	37.4635	77.9929	109.369	1.04397	0.0892293	up	no	1.50103	1.65e-07	up	yes	conserved hypothetical protein
AFLA_086470	140.479	85.5395	25.5374	-0.796623	0.435022	down	no	-2.5523	3.2e-18	down	yes	DUF124 domain protein
AFLA_086800	45.4499	60.3292	129.565	0.357719	0.770045	up	no	1.42918	3.7e-06	up	yes	epoxide hydrolase, putative
AFLA_086830	31.8394	49.1613	67.2629	0.649808	0.438891	up	no	1.07731	0.00143896	up	yes	conserved hypothetical protein
AFLA_086860	6.4562	7.31489	13.8863	0.136736	0.963859	up	no	1.05007	0.0268206	up	yes	NUDIX domain protein
AFLA_086940	1039.07	545.037	408.512	-0.975311	0.53291	down	no	-1.35609	7.24e-10	down	yes	eukaryotic translation initiation factor 4, putative
AFLA_086960	25.4465	55.7194	53.4977	1.1288	0.0989455	up	no	1.0274	0.00355863	up	yes	fumarylacetoacetate hydrolase family protein
AFLA_087040	229.727	138.679	104.817	-0.737515	0.29926	down	no	-1.13222	3.95e-07	down	yes	60S ribosomal protein Nsa2, putative
AFLA_087100	2.7159	3.31451	7.64914	0.258563	0.947043	up	no	1.46649	0.010025	up	yes	benzoate 4-monooxygenase cytochrome P450, putative
AFLA_087240	101.664	177.418	425.259	0.803691	0.32721	up	no	2.01884	1.07e-12	up	yes	glutathione S-transferase, putative
AFLA_087310	15.7233	29.9214	33.9057	0.910245	0.172822	up	no	1.05879	0.00220063	up	yes	conserved hypothetical protein
AFLA_087470	34.1967	25.6016	15.8785	-0.521904	0.815031	down	no	-1.16627	0.000114942	down	yes	plasma membrane low affinity zinc ion transporter, putative
AFLA_087480	120.412	192.603	281.848	0.66806	0.360281	up	no	1.18541	4.01e-05	up	yes	FKBP-type peptidyl-prolyl isomerase, putative
AFLA_087490	10.7757	21.548	22.9073	1.00528	0.166938	up	no	1.07225	0.00857289	up	yes	heme/steroid binding protein, putative
AFLA_087500	13.8377	32.3149	40.7898	1.17883	0.12828	up	no	1.55052	2.47e-07	up	yes	ATP-dependent DNA helicase, putative
AFLA_087530	58.2121	24.9213	17.9933	-1.25102	0.329203	down	no	-1.67848	2.92e-14	down	yes	small nucleolar ribonucleoprotein complex subunit, putative
AFLA_087580	32.0951	49.0548	85.8317	0.579651	0.489876	up	no	1.37444	4.07e-06	up	yes	DUF52 domain protein
AFLA_087620	186.959	80.7999	59.9172	-1.31125	0.100805	down	no	-1.76959	0.00627796	down	yes	NmrA family transcriptional regulator, putative
AFLA_087640	158.504	63.2844	66.8687	-1.45725	0.444989	down	no	-1.34357	2.83e-10	down	yes	alpha,alpha-trehalose phosphate synthase subunit, putative
AFLA_087750	6.45054	6.0182	2.95217	-0.15595	1	down	no	-1.11987	0.0246618	down	yes	conserved hypothetical protein
AFLA_087840	10.7403	4.02052	3.91036	-1.43826	0.0732757	down	no	-1.45483	8.25e-06	down	yes	WD repeat protein
AFLA_087850	2.29983	1.29171	0.640492	-0.896226	0.671573	down	no	-1.86148	0.00753112	down	yes	conserved hypothetical protein
AFLA_088160	2.82454	3.55263	1.14864	0.338176	0.862004	up	no	-1.3016	0.0301446	down	yes	conserved hypothetical protein
AFLA_088270	33.653	18.6549	15.7817	-0.85642	0.372068	down	no	-1.08024	0.0022094	down	yes	nucleolus protein required for cell viability, putative
AFLA_088280	42.05	21.923	16.0309	-0.964365	0.288849	down	no	-1.39288	1.71e-07	down	yes	DUF6 domain protein, putative
AFLA_088460	78.954	34.135	29.6256	-1.23864	0.392525	down	no	-1.39861	4.63e-10	down	yes	ribosome biogenesis protein Erb1, putative
AFLA_088570	1235.01	1918.47	4123.29	0.639915	0.537417	up	no	1.72196	1.69e-08	up	yes	conserved hypothetical protein
AFLA_088720	89.2215	111.947	187.402	0.32904	0.770107	up	no	1.04612	0.000248671	up	yes	iron/copper transporter Atx1, putative
AFLA_089130	64.887	25.9251	24.1615	-1.33362	0.115701	down	no	-1.41547	3.97e-08	down	yes	DNA-binding protein HGH1, putative
AFLA_089180	54.6875	22.5298	21.4634	-1.30317	0.273681	down	no	-1.33706	2.51e-08	down	yes	N2,N2-dimethylguanosine tRNA methyltransferase
AFLA_089260	151.041	59.9782	58.0873	-1.35452	0.221493	down	no	-1.36615	3.11e-10	down	yes	rRNA processing protein Bystin, putative
AFLA_089430	7.49369	4.48347	3.21597	-0.755555	0.421036	down	no	-1.22257	0.0111735	down	yes	hypothetical protein
AFLA_089510	23.8046	40.7525	57.7079	0.819972	0.329187	up	no	1.2854	6.53e-05	up	yes	vacuolar calcium ion transporter, putative
AFLA_089530	6.9967	9.70137	15.3591	0.489206	0.66583	up	no	1.1299	0.00418733	up	yes	vacuolar calcium ion transporter, putative
AFLA_089540	4.47599	7.43743	9.9706	0.741393	0.43522	up	no	1.13786	0.0168272	up	yes	conserved hypothetical protein
AFLA_089630	2.31054	0.430848	0.381943	-2.45265	0.136999	down	no	-2.58796	0.000168296	down	yes	choline transport protein, putative
AFLA_089740	15.494	6.49239	5.8534	-1.24868	0.229622	down	no	-1.39329	0.04508	down	yes	short-chain dehydrogenase, putative
AFLA_089790	3.55857	1.32193	1.18743	-1.42367	0.106268	down	no	-1.59248	0.00384698	down	yes	conserved hypothetical protein
AFLA_089800	7.77223	2.89422	1.49623	-1.4556	0.173364	down	no	-2.44053	0.000575925	down	yes	conserved hypothetical protein
AFLA_089830	21.9004	7.58903	3.35003	-1.59537	0.0731244	down	no	-2.82707	0.0249391	down	yes	hypothetical protein
AFLA_089860	117.577	235.515	324.285	0.932849	0.354109	up	no	1.36608	4.23e-06	up	yes	lipase 1 precursor, putative
AFLA_089890	12.8188	10.9308	6.46474	-0.29729	0.878581	down	no	-1.03763	0.00753112	down	yes	MFS monocarboxylate transporter, putative
AFLA_089910	17.7708	7.2545	2.8477	-1.46434	0.284498	down	no	-2.79297	1.91e-13	down	yes	actin Act1
AFLA_090060	0.29803	1.10588	4.21471	1.8639	0.20341	up	no	3.71941	8.06e-06	up	yes	aspergillopepsin, putative
AFLA_090070	60.3101	46.876	27.2685	-0.375507	0.943094	down	no	-1.0958	0.00105185	down	yes	allergen, putative
AFLA_090090	5.90809	7.34372	1.25532	0.276686	0.948955	up	no	-2.23323	0.0019858	down	yes	conserved hypothetical protein
AFLA_090220	10.1431	13.1602	3.00212	0.34933	0.809907	up	no	-1.80648	0.000509217	down	yes	integral membrane protein
AFLA_090310	2.10974	6.66414	7.34111	1.65391	0.23565	up	no	1.7863	0.049828	up	yes	hypothetical protein
AFLA_090420	8.66482	6.52849	2.95076	-0.429449	0.810772	down	no	-1.60546	0.00174706	down	yes	short-chain type dehydrogenase, putative
AFLA_090500	427.104	266.585	161.002	-0.780826	0.498943	down	no	-1.53684	3.87e-13	down	yes	mitochondrial phosphate carrier protein, putative
AFLA_090580	11.6032	17.4685	4.29679	0.632014	0.582477	up	no	-1.43854	0.00124191	down	yes	conserved hypothetical protein
AFLA_090720	1.54493	0.751826	0.223432	-1.16221	0.619432	down	no	-2.86983	0.000293024	down	yes	male sterility domain containing protein, putative
AFLA_090850	2.65998	2.17214	1.17573	-0.342206	0.868161	down	no	-1.188	0.00159225	down	yes	tRNA-splicing endonuclease, putative
AFLA_090940	37.1783	54.7768	79.795	0.572526	0.540851	up	no	1.08966	0.00225218	up	yes	peptidyl prolyl cis-trans isomerase (CypC), putative
AFLA_090970	14.5299	19.3033	34.7238	0.377762	0.768023	up	no	1.2274	0.00103771	up	yes	GNAT family acetyltransferase, putative
AFLA_091040	9.9542	5.08983	4.48821	-1.01262	0.279965	down	no	-1.1687	0.000754826	down	yes	ribonuclease P complex subunit Pop1, putative
AFLA_091050	9.39849	4.10756	3.32408	-1.17691	0.2717	down	no	-1.48717	0.0162971	down	yes	hypothetical protein
AFLA_091060	830.325	1296.03	2168.52	0.585119	0.587215	up	no	1.30209	1.28e-05	up	yes	allergen Asp F3
AFLA_091180	56.5754	118.242	137.908	1.05525	0.0970146	up	no	1.24462	1.77e-05	up	yes	ARP2/3 complex 20 kDa subunit (p20-ARC), putative
AFLA_091210	5.98391	2.87	1.50763	-1.02035	0.33808	down	no	-1.93801	0.00137325	down	yes	MFS drug efflux pump, putative
AFLA_091240	2.55289	1.50614	0.832778	-0.782798	0.543763	down	no	-1.63958	0.0140199	down	yes	conserved hypothetical protein
AFLA_091380	104.257	251.828	249.781	1.22962	0.107917	up	no	1.18334	9.32e-05	up	yes	phosphoglycerate mutase family protein
AFLA_091700	7.80334	5.25454	3.48914	-0.566425	0.574171	down	no	-1.1607	0.00235757	down	yes	asparagine synthetase, putative
AFLA_091970	12.8363	12.9808	33.9373	-0.081777	1	down	no	1.30898	0.0370343	up	yes	hypothetical protein
AFLA_091990	1370.97	1858.39	3101.46	0.446647	0.739986	up	no	1.14636	9.91e-05	up	yes	peptidyl-prolyl cis-trans isomerase
AFLA_092100	578.99	215.708	205.212	-1.45387	0.219114	down	no	-1.48672	3.93e-13	down	yes	IMP dehydrogenase, putative
AFLA_092220	73.2322	30.32	26.8414	-1.31331	0.0739153	down	no	-1.48121	8.17e-05	down	yes	hypothetical protein
AFLA_092230	96.7889	52.9098	21.5541	-0.961936	0.487037	down	no	-2.20458	1.09e-10	down	yes	sugar transporter, putative
AFLA_092290	8.32891	11.2729	28.8644	0.460498	0.760923	up	no	1.77682	3.92e-07	up	yes	conserved hypothetical protein
AFLA_092670	8.01996	4.20929	3.56466	-0.91912	0.357993	down	no	-1.14557	0.013864	down	yes	conserved hypothetical protein
AFLA_092690	15.8644	10.2298	7.17182	-0.675693	0.608283	down	no	-1.14116	5.51e-05	down	yes	Leucine carboxyl methyltransferase family
AFLA_092980	2.5585	1.64135	0.853591	-0.762126	0.792026	down	no	-1.65423	0.00611808	down	yes	conserved hypothetical protein
AFLA_093010	104.006	28.7906	30.7574	-1.8538	0.0573654	down	no	-1.73534	4.84e-09	down	yes	eukaryotic translation initation factor eIF1a-like protein, putative
AFLA_093100	55.7467	30.6205	19.2836	-0.895767	0.325761	down	no	-1.58483	4.68e-05	down	yes	hypothetical protein
AFLA_093130	92.4693	50.0055	41.932	-0.893647	0.558822	down	no	-1.11291	1.95e-06	down	yes	rRNA methyltransferase Spb1, putative
AFLA_093300	251.271	90.8034	82.7962	-1.48257	0.0936643	down	no	-1.59068	4.61e-14	down	yes	rRNA processing protein (Ebp2), putative
AFLA_093580	1.62523	1.62069	0.370518	-0.00607854	1	down	no	-2.16678	0.00192096	down	yes	membrane oxidoreductase TmpA, putative
AFLA_093590	447.599	206.983	214.31	-1.19617	0.0980195	down	no	-1.14374	5.19e-05	down	yes	arrestin (or S-antigen), N-terminal domain protein
AFLA_093600	12.1895	7.57461	4.13054	-0.685206	0.627502	down	no	-1.55926	0.0169976	down	yes	oxidoreductase, putative
AFLA_093650	62.3401	28.9388	17.7986	-1.1828	0.129151	down	no	-1.89314	6.52e-16	down	yes	GTP binding protein (GTPBP1), putative
AFLA_093660	1549.2	1576	629.922	-0.119593	1	down	no	-1.41313	0.0220733	down	yes	solid-state culture expressed protein (Aos23), putative
AFLA_093690	10.1419	15.0563	22.0797	0.56505	0.594535	up	no	1.11942	0.00174636	up	yes	CorA family metal ion transporter, putative
AFLA_093990	33.4577	31.7432	11.2878	-0.146374	1	down	no	-1.65951	6.1e-05	down	yes	arylsulfatase, putative
AFLA_094190	22.4948	42.0291	60.3598	0.846181	0.361212	up	no	1.34255	0.00034567	up	yes	conserved hypothetical protein
AFLA_094200	69.994	22.2761	33.8889	-1.65359	0.128917	down	no	-1.02031	0.00033282	down	yes	hypothetical protein
AFLA_094280	0.116347	0.177949	0.931459	0.54362	1	up	no	2.96191	0.0361407	up	yes	agmatinase, putative
AFLA_094300	0.117088	0.224911	0.832819	0.880122	0.939084	up	no	2.76884	0.0282912	up	yes	conserved hypothetical protein
AFLA_094310	777.651	412.784	366.945	-0.896394	0.208974	down	no	-1.08268	1.11e-06	down	yes	conserved hypothetical protein
AFLA_094450	10.5295	12.4249	126.264	0.252094	0.863822	up	no	3.52976	5.75e-13	up	yes	aspartic endopeptidase Pep1/aspergillopepsin F
AFLA_094570	7.96222	9.30025	21.0118	0.196064	0.913878	up	no	1.31964	0.0156987	up	yes	hypothetical protein
AFLA_094610	7.39057	3.26375	1.10895	-1.19181	0.229622	down	no	-2.76992	3.8e-07	down	yes	hypothetical protein
AFLA_094630	371.908	729.871	1245.1	0.957239	0.255874	up	no	1.68633	2.36e-09	up	yes	triosephosphate isomerase
AFLA_094650	204.554	73.6437	77.8272	-1.49335	0.225289	down	no	-1.3762	1.62e-09	down	yes	60S acidic ribosomal protein P0, putative
AFLA_094740	10.6389	1.30991	4.44952	-3.22687	0.253711	down	no	-1.40757	0.0481079	down	yes	alcohol dehydrogenase, putative
AFLA_094790	135.558	62.2599	53.993	-1.21097	0.125143	down	no	-1.42931	2.34e-10	down	yes	thioredoxin, putative
AFLA_095070	9.41775	7.08812	4.38069	-0.446422	0.768062	down	no	-1.17067	0.00492155	down	yes	MFS multidrug transporter, putative
AFLA_095170	0.319075	0.132988	0.0234588	-1.27882	0.780656	down	no	-3.84797	0.0465795	down	yes	cytochrome P450, putative
AFLA_095220	4.69524	7.31646	1.3218	0.605296	0.67635	up	no	-1.86018	0.0099012	down	yes	conserved hypothetical protein
AFLA_095230	1.45334	2.83487	0.32264	0.906285	0.602497	up	no	-2.18326	0.0261983	down	yes	conserved hypothetical protein
AFLA_095430	4.53656	6.50486	2.17095	0.525089	0.648002	up	no	-1.08127	0.0351948	down	yes	conserved hypothetical protein
AFLA_095450	5.05072	5.13122	1.872	-0.0765521	1	down	no	-1.55441	0.0237524	down	yes	conserved hypothetical protein
AFLA_095460	41.6007	13.987	5.02288	-1.53234	0.107841	down	no	-3.01422	1.52e-21	down	yes	conserved hypothetical protein
AFLA_095480	4.72336	2.45981	0.912405	-0.958145	0.500292	down	no	-2.34971	0.000385157	down	yes	hypothetical protein
AFLA_095520	11.2394	11.3568	5.50767	-0.0612354	1	down	no	-1.10949	0.0401257	down	yes	alcohol dehydrogenase, putative
AFLA_095530	0.361604	0.237975	0.0202424	-0.578269	0.958533	down	no	-4.23436	0.0136305	down	yes	neuroligin, putative
[truncated: 904 more rows]

## Sheet: 361 shared genes
a: the average from each genes triplicate FPKM value. P: untreated A. flavus samples, P02: 0.2% (w/v) gallic acid treated A. flavus samples, P08: 0.8% (w/v) gallic acid treated A. flavus samples.
[truncated: 365 more rows]
